# Supplementary material
Source: HighWire-hosted journal article supplement (doi:10.1101/rna.073353.119)
Supplement: Supplemental_Tab_S1.xlsx [file Supplemental_Tab_S1.xlsx]

## Sheet: Legend
Supplementary Table 1. Differentially expressed genes (DEGs) in A549 and MCF-7 cells under hypoxia.
Genes were filtered for an absolute fold change > 1.5 (given as log2-transformed fold change, ‘log2FoldChange’) and an adjusted P value < 0.05 (‘padj’) from DESeq2.
‘baseMean’ refers to the mean read count after library size correction, and ‘maxTPM’ gives the maximum expression level in transcript per million (TPM) in any sample.
Information is given for (i) 2,490 DEGs in A549 (blue), (ii) 4,503 DEGs in MCF-7 (red), (iii) 1,224 DEGs that are shared between both cell lines, requiring a minimum expression of TPM > 1 in at least one sample.

## Sheet: A549_DEGs
GENCODE_gene_id	gene_name	gene_type	A549.baseMean	A549.log2FoldChange	A549.pvalue	A549.padj	A549.maxTPM	description
ENSG00000000460.16	C1orf112	protein_coding	1634.65	-0.710327	0.000371654	0.00241649	20.7507	chromosome 1 open reading frame 112 [Source:HGNC Symbol;Acc:HGNC:25565]
ENSG00000001497.16	LAS1L	protein_coding	4559.14	-0.869931	2.58426e-10	8.26862e-09	57.143	LAS1 like, ribosome biogenesis factor [Source:HGNC Symbol;Acc:HGNC:25726]
ENSG00000001617.11	SEMA3F	protein_coding	323.761	-0.978306	0.000369483	0.00240625	5.24345	semaphorin 3F [Source:HGNC Symbol;Acc:HGNC:10728]
ENSG00000003096.13	KLHL13	protein_coding	165.478	-1.25426	2.75735e-05	0.000256413	2.15691	kelch like family member 13 [Source:HGNC Symbol;Acc:HGNC:22931]
ENSG00000004478.7	FKBP4	protein_coding	12732.5	-0.636307	2.73444e-06	3.39759e-05	168.337	FK506 binding protein 4 [Source:HGNC Symbol;Acc:HGNC:3720]
ENSG00000004799.7	PDK4	protein_coding	6682.8	-2.78372	7.69209e-31	2.54153e-28	143.076	pyruvate dehydrogenase kinase 4 [Source:HGNC Symbol;Acc:HGNC:8812]
ENSG00000004848.6	ARX	protein_coding	212.664	-1.47499	9.07194e-06	9.7011e-05	6.01212	aristaless related homeobox [Source:HGNC Symbol;Acc:HGNC:18060]
ENSG00000005001.9	PRSS22	protein_coding	34.0641	1.31364	0.00181488	0.0092341	1.23684	protease, serine 22 [Source:HGNC Symbol;Acc:HGNC:14368]
ENSG00000005022.5	SLC25A5	protein_coding	17838.8	-0.646493	5.82556e-07	8.5586e-06	778.535	solute carrier family 25 member 5 [Source:HGNC Symbol;Acc:HGNC:10991]
ENSG00000005100.12	DHX33	protein_coding	2558.5	-0.765009	1.62947e-07	2.72532e-06	29.5466	DEAH-box helicase 33 [Source:HGNC Symbol;Acc:HGNC:16718]
ENSG00000005243.9	COPZ2	protein_coding	464.702	0.870068	0.000644942	0.00386154	19.2465	coatomer protein complex subunit zeta 2 [Source:HGNC Symbol;Acc:HGNC:19356]
ENSG00000005249.12	PRKAR2B	protein_coding	605.002	-0.799244	0.000317478	0.00210914	10.3642	protein kinase cAMP-dependent type II regulatory subunit beta [Source:HGNC Symbol;Acc:HGNC:9392]
ENSG00000005448.16	WDR54	protein_coding	3167.21	0.849722	2.25049e-09	5.69305e-08	75.2821	WD repeat domain 54 [Source:HGNC Symbol;Acc:HGNC:25770]
ENSG00000005884.17	ITGA3	protein_coding	26982.9	0.613688	3.6164e-06	4.35961e-05	161.817	integrin subunit alpha 3 [Source:HGNC Symbol;Acc:HGNC:6139]
ENSG00000006327.13	TNFRSF12A	protein_coding	4034.63	1.57359	2.50041e-16	2.30009e-14	177.111	TNF receptor superfamily member 12A [Source:HGNC Symbol;Acc:HGNC:18152]
ENSG00000006459.10	KDM7A	protein_coding	2106.07	1.34861	5.89162e-17	5.96158e-15	16.8855	lysine demethylase 7A [Source:HGNC Symbol;Acc:HGNC:22224]
ENSG00000006576.16	PHTF2	protein_coding	2434.45	-0.62184	7.79119e-05	0.000627559	20.3492	putative homeodomain transcription factor 2 [Source:HGNC Symbol;Acc:HGNC:13411]
ENSG00000006625.17	GGCT	protein_coding	1076.1	-0.966967	2.68275e-08	5.41567e-07	51.0851	gamma-glutamylcyclotransferase [Source:HGNC Symbol;Acc:HGNC:21705]
ENSG00000006634.7	DBF4	protein_coding	2051.19	-1.29815	3.94922e-11	1.49934e-09	40.2279	DBF4 zinc finger [Source:HGNC Symbol;Acc:HGNC:17364]
ENSG00000006747.14	SCIN	protein_coding	203.277	0.852094	0.00266614	0.0126176	1.24873	scinderin [Source:HGNC Symbol;Acc:HGNC:21695]
ENSG00000006756.15	ARSD	protein_coding	4853.35	0.592483	0.00138836	0.00740854	48.263	arylsulfatase D [Source:HGNC Symbol;Acc:HGNC:717]
ENSG00000007080.10	CCDC124	protein_coding	1073.79	-0.964749	5.90414e-09	1.38133e-07	44.8251	coiled-coil domain containing 124 [Source:HGNC Symbol;Acc:HGNC:25171]
ENSG00000007384.15	RHBDF1	protein_coding	1977.36	1.21173	1.09638e-10	3.80094e-09	29.8639	rhomboid 5 homolog 1 [Source:HGNC Symbol;Acc:HGNC:20561]
ENSG00000007968.6	E2F2	protein_coding	670.265	-1.7399	1.16783e-16	1.11877e-14	10.7515	E2F transcription factor 2 [Source:HGNC Symbol;Acc:HGNC:3114]
ENSG00000008256.15	CYTH3	protein_coding	3348.98	0.789828	1.28587e-08	2.78319e-07	36.2781	cytohesin 3 [Source:HGNC Symbol;Acc:HGNC:9504]
ENSG00000009844.15	VTA1	protein_coding	3071.03	-0.608352	4.65062e-05	0.000402424	29.2737	vesicle trafficking 1 [Source:HGNC Symbol;Acc:HGNC:20954]
ENSG00000009950.15	MLXIPL	protein_coding	159.814	-0.910271	0.00144487	0.00765208	2.3125	MLX interacting protein like [Source:HGNC Symbol;Acc:HGNC:12744]
ENSG00000010165.19	METTL13	protein_coding	3434.77	-0.644332	2.50948e-05	0.000235664	58.274	methyltransferase like 13 [Source:HGNC Symbol;Acc:HGNC:24248]
ENSG00000010292.12	NCAPD2	protein_coding	14449.7	-0.771825	1.14372e-07	1.99966e-06	152.691	non-SMC condensin I complex subunit D2 [Source:HGNC Symbol;Acc:HGNC:24305]
ENSG00000010810.17	FYN	protein_coding	200.645	0.692182	0.0099604	0.0366414	1.67591	FYN proto-oncogene, Src family tyrosine kinase [Source:HGNC Symbol;Acc:HGNC:4037]
ENSG00000010818.8	HIVEP2	protein_coding	2443.52	0.616994	1.4528e-05	0.00014573	15.0175	human immunodeficiency virus type I enhancer binding protein 2 [Source:HGNC Symbol;Acc:HGNC:4921]
ENSG00000011028.13	MRC2	protein_coding	10316.5	0.83516	2.76747e-10	8.76816e-09	96.8297	mannose receptor C type 2 [Source:HGNC Symbol;Acc:HGNC:16875]
ENSG00000011304.17	PTBP1	protein_coding	12732.6	-0.594758	4.68368e-06	5.49484e-05	118.614	polypyrimidine tract binding protein 1 [Source:HGNC Symbol;Acc:HGNC:9583]
ENSG00000011376.9	LARS2	protein_coding	2059.84	-0.702542	5.89421e-06	6.71549e-05	25.5799	leucyl-tRNA synthetase 2, mitochondrial [Source:HGNC Symbol;Acc:HGNC:17095]
ENSG00000011638.10	TMEM159	protein_coding	1302.79	0.820438	0.000553214	0.00339006	38.2464	transmembrane protein 159 [Source:HGNC Symbol;Acc:HGNC:30136]
ENSG00000012048.20	BRCA1	protein_coding	7080.41	-1.10285	8.07748e-12	3.49664e-10	63.9541	BRCA1, DNA repair associated [Source:HGNC Symbol;Acc:HGNC:1100]
ENSG00000012174.11	MBTPS2	protein_coding	3438.95	-0.616686	0.00178034	0.00909263	25.3358	membrane bound transcription factor peptidase, site 2 [Source:HGNC Symbol;Acc:HGNC:15455]
ENSG00000012779.10	ALOX5	protein_coding	128.547	1.21848	0.000680443	0.00403678	3.27157	arachidonate 5-lipoxygenase [Source:HGNC Symbol;Acc:HGNC:435]
ENSG00000012822.15	CALCOCO1	protein_coding	4797.03	1.14835	3.15347e-16	2.75972e-14	37.7337	calcium binding and coiled-coil domain 1 [Source:HGNC Symbol;Acc:HGNC:29306]
ENSG00000012963.13	UBR7	protein_coding	2467.06	-0.631587	4.26766e-05	0.000375712	42.2517	ubiquitin protein ligase E3 component n-recognin 7 (putative) [Source:HGNC Symbol;Acc:HGNC:20344]
ENSG00000013503.9	POLR3B	protein_coding	1057.33	-0.609433	0.000273682	0.00186016	13.9443	RNA polymerase III subunit B [Source:HGNC Symbol;Acc:HGNC:30348]
ENSG00000013810.18	TACC3	protein_coding	3356.86	-0.599614	0.000527845	0.00325307	34.9948	transforming acidic coiled-coil containing protein 3 [Source:HGNC Symbol;Acc:HGNC:11524]
ENSG00000014138.8	POLA2	protein_coding	2054.01	-1.18861	1.2174e-14	8.64459e-13	26.9998	DNA polymerase alpha 2, accessory subunit [Source:HGNC Symbol;Acc:HGNC:30073]
ENSG00000020577.13	SAMD4A	protein_coding	1595.17	1.73093	2.2404e-27	5.75748e-25	9.83235	sterile alpha motif domain containing 4A [Source:HGNC Symbol;Acc:HGNC:23023]
ENSG00000021826.14	CPS1	protein_coding	8648.7	-1.37483	5.52805e-10	1.65433e-08	66.2852	carbamoyl-phosphate synthase 1 [Source:HGNC Symbol;Acc:HGNC:2323]
ENSG00000022267.16	FHL1	protein_coding	2368.61	0.807233	0.00111446	0.00614128	31.2605	four and a half LIM domains 1 [Source:HGNC Symbol;Acc:HGNC:3702]
ENSG00000022567.9	SLC45A4	protein_coding	2909.18	-1.0107	1.53369e-07	2.58113e-06	25.031	solute carrier family 45 member 4 [Source:HGNC Symbol;Acc:HGNC:29196]
ENSG00000023572.8	GLRX2	protein_coding	948.452	-0.742671	0.000185197	0.0013265	55.7162	glutaredoxin 2 [Source:HGNC Symbol;Acc:HGNC:16065]
ENSG00000023734.10	STRAP	protein_coding	10301.3	-0.592369	2.32208e-05	0.000219722	316.06	serine/threonine kinase receptor associated protein [Source:HGNC Symbol;Acc:HGNC:30796]
ENSG00000023839.10	ABCC2	protein_coding	46749.8	-0.629057	2.73998e-07	4.3363e-06	472.426	ATP binding cassette subfamily C member 2 [Source:HGNC Symbol;Acc:HGNC:53]
ENSG00000023909.9	GCLM	protein_coding	8934.42	-1.10058	8.49709e-11	2.98412e-09	137.606	glutamate-cysteine ligase modifier subunit [Source:HGNC Symbol;Acc:HGNC:4312]
ENSG00000024422.11	EHD2	protein_coding	8071.03	0.798782	1.21285e-07	2.10235e-06	136.722	EH domain containing 2 [Source:HGNC Symbol;Acc:HGNC:3243]
ENSG00000024526.16	DEPDC1	protein_coding	3220.19	-1.23065	3.5551e-10	1.09842e-08	48.6359	DEP domain containing 1 [Source:HGNC Symbol;Acc:HGNC:22949]
ENSG00000025039.14	RRAGD	protein_coding	1084.97	1.08217	4.04179e-10	1.24168e-08	14.2337	Ras related GTP binding D [Source:HGNC Symbol;Acc:HGNC:19903]
ENSG00000026103.19	FAS	protein_coding	1078.65	-1.28086	1.82804e-12	8.78217e-11	23.58	Fas cell surface death receptor [Source:HGNC Symbol;Acc:HGNC:11920]
ENSG00000028116.16	VRK2	protein_coding	1666.97	-0.959823	0.000179225	0.0012902	38.2933	vaccinia related kinase 2 [Source:HGNC Symbol;Acc:HGNC:12719]
ENSG00000029534.19	ANK1	protein_coding	2489.5	1.13182	4.11927e-06	4.88838e-05	19.3541	ankyrin 1 [Source:HGNC Symbol;Acc:HGNC:492]
ENSG00000029993.14	HMGB3	protein_coding	8452.44	-0.865049	1.595e-09	4.24722e-08	150.26	high mobility group box 3 [Source:HGNC Symbol;Acc:HGNC:5004]
ENSG00000030066.13	NUP160	protein_coding	5292.22	-0.689001	1.30411e-07	2.23423e-06	40.9106	nucleoporin 160 [Source:HGNC Symbol;Acc:HGNC:18017]
ENSG00000030582.16	GRN	protein_coding	13730.8	0.770809	5.21622e-09	1.23286e-07	231.212	granulin precursor [Source:HGNC Symbol;Acc:HGNC:4601]
ENSG00000032444.15	PNPLA6	protein_coding	4432.46	0.703688	0.0015661	0.00818173	45.6642	patatin like phospholipase domain containing 6 [Source:HGNC Symbol;Acc:HGNC:16268]
ENSG00000033327.12	GAB2	protein_coding	1575.53	1.1243	3.59736e-09	8.79696e-08	16.2307	GRB2 associated binding protein 2 [Source:HGNC Symbol;Acc:HGNC:14458]
ENSG00000034510.5	TMSB10	protein_coding	80595.2	0.802844	9.93735e-10	2.77868e-08	10286.2	thymosin beta 10 [Source:HGNC Symbol;Acc:HGNC:11879]
ENSG00000035499.12	DEPDC1B	protein_coding	1369.41	-0.950999	2.91826e-08	5.85461e-07	27.2865	DEP domain containing 1B [Source:HGNC Symbol;Acc:HGNC:24902]
ENSG00000035664.11	DAPK2	protein_coding	629.594	0.639133	0.00105751	0.00586943	2.79716	death associated protein kinase 2 [Source:HGNC Symbol;Acc:HGNC:2675]
ENSG00000037897.16	METTL1	protein_coding	934.208	-0.809718	2.17596e-06	2.75871e-05	23.8556	methyltransferase like 1 [Source:HGNC Symbol;Acc:HGNC:7030]
ENSG00000038382.17	TRIO	protein_coding	17236.2	0.892355	6.67921e-12	2.95455e-10	61.939	trio Rho guanine nucleotide exchange factor [Source:HGNC Symbol;Acc:HGNC:12303]
ENSG00000039123.15	SKIV2L2	protein_coding	6975.15	-0.754688	1.19756e-06	1.60368e-05	78.3775	Ski2 like RNA helicase 2 [Source:HGNC Symbol;Acc:HGNC:18734]
ENSG00000039560.13	RAI14	protein_coding	10801.9	0.849989	4.35916e-08	8.34218e-07	98.5135	retinoic acid induced 14 [Source:HGNC Symbol;Acc:HGNC:14873]
ENSG00000041353.9	RAB27B	protein_coding	9703.9	-1.08382	5.13252e-08	9.62868e-07	101.698	RAB27B, member RAS oncogene family [Source:HGNC Symbol;Acc:HGNC:9767]
ENSG00000041880.14	PARP3	protein_coding	1035.61	1.06479	2.11152e-09	5.36664e-08	24.1663	poly(ADP-ribose) polymerase family member 3 [Source:HGNC Symbol;Acc:HGNC:273]
ENSG00000044090.8	CUL7	protein_coding	2900.98	0.800053	5.08191e-08	9.5448e-07	36.8483	cullin 7 [Source:HGNC Symbol;Acc:HGNC:21024]
ENSG00000044115.20	CTNNA1	protein_coding	33100.4	0.599154	9.80543e-07	1.34877e-05	227.1	catenin alpha 1 [Source:HGNC Symbol;Acc:HGNC:2509]
ENSG00000044574.7	HSPA5	protein_coding	24708.9	-0.926772	1.21658e-10	4.15537e-09	435.832	heat shock protein family A (Hsp70) member 5 [Source:HGNC Symbol;Acc:HGNC:5238]
ENSG00000047457.13	CP	protein_coding	29272.7	1.02513	0.0141812	0.0487903	405.283	ceruloplasmin [Source:HGNC Symbol;Acc:HGNC:2295]
ENSG00000047579.19	DTNBP1	protein_coding	223.027	-0.80858	0.00649951	0.0260915	5.28038	dystrobrevin binding protein 1 [Source:HGNC Symbol;Acc:HGNC:17328]
ENSG00000047634.14	SCML1	protein_coding	621.183	-0.790627	0.000173445	0.00125692	8.46736	Scm polycomb group protein like 1 [Source:HGNC Symbol;Acc:HGNC:10580]
ENSG00000048162.19	NOP16	protein_coding	1469.24	-1.14818	1.55682e-13	9.30074e-12	37.7763	NOP16 nucleolar protein [Source:HGNC Symbol;Acc:HGNC:26934]
ENSG00000048392.11	RRM2B	protein_coding	5557.72	-0.753164	6.33616e-07	9.22909e-06	72.936	ribonucleotide reductase regulatory TP53 inducible subunit M2B [Source:HGNC Symbol;Acc:HGNC:17296]
ENSG00000048471.13	SNX29	protein_coding	1587.43	0.958431	0.000281662	0.00190735	11.7456	sorting nexin 29 [Source:HGNC Symbol;Acc:HGNC:30542]
ENSG00000048544.5	MRPS10	protein_coding	2063.27	-0.636037	4.46259e-05	0.000388647	66.1159	mitochondrial ribosomal protein S10 [Source:HGNC Symbol;Acc:HGNC:14502]
ENSG00000048991.16	R3HDM1	protein_coding	2092.17	-0.955894	4.89734e-11	1.8208e-09	18.6596	R3H domain containing 1 [Source:HGNC Symbol;Acc:HGNC:9757]
ENSG00000049239.12	H6PD	protein_coding	4671.34	0.846254	6.44524e-08	1.18443e-06	35.3691	hexose-6-phosphate dehydrogenase/glucose 1-dehydrogenase [Source:HGNC Symbol;Acc:HGNC:4795]
ENSG00000049541.10	RFC2	protein_coding	2279.62	-0.73287	3.33564e-07	5.16784e-06	70.4177	replication factor C subunit 2 [Source:HGNC Symbol;Acc:HGNC:9970]
ENSG00000049769.12	PPP1R3F	protein_coding	858.101	0.779717	0.000787335	0.00457536	14.7596	protein phosphatase 1 regulatory subunit 3F [Source:HGNC Symbol;Acc:HGNC:14944]
ENSG00000049883.14	PTCD2	protein_coding	1813.2	-0.62391	3.9591e-05	0.000351607	9.96408	pentatricopeptide repeat domain 2 [Source:HGNC Symbol;Acc:HGNC:25734]
ENSG00000050344.8	NFE2L3	protein_coding	758.858	-0.725558	0.000134085	0.00100969	12.2712	nuclear factor, erythroid 2 like 3 [Source:HGNC Symbol;Acc:HGNC:7783]
ENSG00000050438.16	SLC4A8	protein_coding	274.63	-0.873379	0.00670647	0.0267763	1.32521	solute carrier family 4 member 8 [Source:HGNC Symbol;Acc:HGNC:11034]
ENSG00000051128.18	HOMER3	protein_coding	863.857	1.20855	2.10171e-07	3.43357e-06	20.2121	homer scaffolding protein 3 [Source:HGNC Symbol;Acc:HGNC:17514]
ENSG00000051180.16	RAD51	protein_coding	471.957	-1.02418	3.70758e-06	4.45295e-05	12.0034	RAD51 recombinase [Source:HGNC Symbol;Acc:HGNC:9817]
ENSG00000051341.13	POLQ	protein_coding	3648.08	-0.889644	3.22236e-07	5.02118e-06	31.4991	DNA polymerase theta [Source:HGNC Symbol;Acc:HGNC:9186]
ENSG00000052749.13	RRP12	protein_coding	3645.39	-0.742731	1.64807e-05	0.000163494	29.0726	ribosomal RNA processing 12 homolog [Source:HGNC Symbol;Acc:HGNC:29100]
ENSG00000053108.16	FSTL4	protein_coding	703.575	-1.00551	2.67944e-06	3.33951e-05	8.09278	follistatin like 4 [Source:HGNC Symbol;Acc:HGNC:21389]
ENSG00000053254.15	FOXN3	protein_coding	3025.34	0.858666	6.47641e-10	1.90296e-08	18.2154	forkhead box N3 [Source:HGNC Symbol;Acc:HGNC:1928]
ENSG00000053372.4	MRTO4	protein_coding	2967.3	-0.769072	2.26335e-08	4.69189e-07	70.4909	MRT4 homolog, ribosome maturation factor [Source:HGNC Symbol;Acc:HGNC:18477]
ENSG00000054277.12	OPN3	protein_coding	6807.78	0.733584	3.477e-06	4.21037e-05	136.181	opsin 3 [Source:HGNC Symbol;Acc:HGNC:14007]
ENSG00000054611.13	TBC1D22A	protein_coding	1898.34	0.913718	8.25267e-10	2.36061e-08	24.3034	TBC1 domain family member 22A [Source:HGNC Symbol;Acc:HGNC:1309]
ENSG00000054654.15	SYNE2	protein_coding	20027.2	0.699054	2.41923e-07	3.8818e-06	42.2797	spectrin repeat containing nuclear envelope protein 2 [Source:HGNC Symbol;Acc:HGNC:17084]
ENSG00000054967.12	RELT	protein_coding	904.498	0.621273	0.00187889	0.00949119	9.10638	RELT, TNF receptor [Source:HGNC Symbol;Acc:HGNC:13764]
ENSG00000055044.10	NOP58	protein_coding	4552.08	-0.95424	4.09994e-12	1.8698e-10	100.687	NOP58 ribonucleoprotein [Source:HGNC Symbol;Acc:HGNC:29926]
ENSG00000055813.5	CCDC85A	protein_coding	295.66	1.04785	8.07068e-06	8.7753e-05	5.34902	coiled-coil domain containing 85A [Source:HGNC Symbol;Acc:HGNC:29400]
ENSG00000056050.6	C4orf27	protein_coding	973.851	-0.882454	1.09746e-05	0.00011441	51.6681	histone PARylation factor 1 [Source:HGNC Symbol;Acc:HGNC:26051]
ENSG00000058056.8	USP13	protein_coding	1517.28	-1.01216	6.73964e-08	1.23433e-06	12.5783	ubiquitin specific peptidase 13 [Source:HGNC Symbol;Acc:HGNC:12611]
ENSG00000058085.14	LAMC2	protein_coding	2601.7	1.06212	1.04579e-12	5.27454e-11	26.7414	laminin subunit gamma 2 [Source:HGNC Symbol;Acc:HGNC:6493]
ENSG00000058729.10	RIOK2	protein_coding	1934.65	-0.621573	0.000101547	0.000792695	24.2169	RIO kinase 2 [Source:HGNC Symbol;Acc:HGNC:18999]
ENSG00000059728.10	MXD1	protein_coding	483.006	0.887874	6.90792e-05	0.000568578	5.11358	MAX dimerization protein 1 [Source:HGNC Symbol;Acc:HGNC:6761]
ENSG00000060491.16	OGFR	protein_coding	2936.4	0.596252	4.04251e-05	0.000358228	36.3526	opioid growth factor receptor [Source:HGNC Symbol;Acc:HGNC:15768]
ENSG00000060688.12	SNRNP40	protein_coding	3235.98	-0.700757	1.05525e-06	1.44052e-05	57.0356	small nuclear ribonucleoprotein U5 subunit 40 [Source:HGNC Symbol;Acc:HGNC:30857]
ENSG00000061656.9	SPAG4	protein_coding	641.432	2.6967	1.18832e-41	6.87106e-39	25.2657	sperm associated antigen 4 [Source:HGNC Symbol;Acc:HGNC:11214]
ENSG00000062038.13	CDH3	protein_coding	86.5189	1.76185	6.44495e-07	9.35818e-06	1.26196	cadherin 3 [Source:HGNC Symbol;Acc:HGNC:1762]
ENSG00000062282.14	DGAT2	protein_coding	139.336	-1.45986	1.07051e-05	0.000111889	1.57806	diacylglycerol O-acyltransferase 2 [Source:HGNC Symbol;Acc:HGNC:16940]
ENSG00000063127.15	SLC6A16	protein_coding	379.15	0.641299	0.00716118	0.0281391	6.74643	solute carrier family 6 member 16 [Source:HGNC Symbol;Acc:HGNC:13622]
ENSG00000064199.6	SPA17	protein_coding	1047.68	-0.71174	1.94035e-05	0.00018766	13.689	sperm autoantigenic protein 17 [Source:HGNC Symbol;Acc:HGNC:11210]
ENSG00000064205.10	WISP2	protein_coding	3968.42	4.04834	7.62734e-101	3.08717e-97	85.4957	WNT1 inducible signaling pathway protein 2 [Source:HGNC Symbol;Acc:HGNC:12770]
ENSG00000064393.15	HIPK2	protein_coding	6292.97	-0.840067	1.58043e-06	2.06849e-05	30.5319	homeodomain interacting protein kinase 2 [Source:HGNC Symbol;Acc:HGNC:14402]
ENSG00000064547.13	LPAR2	protein_coding	223.418	0.75396	0.00376505	0.016797	4.60165	lysophosphatidic acid receptor 2 [Source:HGNC Symbol;Acc:HGNC:3168]
ENSG00000064651.13	SLC12A2	protein_coding	38859	-1.2308	3.30256e-14	2.16471e-12	271.795	solute carrier family 12 member 2 [Source:HGNC Symbol;Acc:HGNC:10911]
ENSG00000064655.18	EYA2	protein_coding	354.595	0.906056	0.00172551	0.00885452	8.68748	EYA transcriptional coactivator and phosphatase 2 [Source:HGNC Symbol;Acc:HGNC:3520]
ENSG00000065183.15	WDR3	protein_coding	4302.47	-0.657281	7.03003e-06	7.79029e-05	29.1922	WD repeat domain 3 [Source:HGNC Symbol;Acc:HGNC:12755]
ENSG00000065308.4	TRAM2	protein_coding	5338.69	0.588794	3.1297e-05	0.000284822	49.2722	translocation associated membrane protein 2 [Source:HGNC Symbol;Acc:HGNC:16855]
ENSG00000065328.16	MCM10	protein_coding	3357.4	-1.49053	3.83783e-21	6.03247e-19	53.0413	minichromosome maintenance 10 replication initiation factor [Source:HGNC Symbol;Acc:HGNC:18043]
ENSG00000065548.17	ZC3H15	protein_coding	5570.12	-0.645912	1.35059e-05	0.000137356	124.811	zinc finger CCCH-type containing 15 [Source:HGNC Symbol;Acc:HGNC:29528]
ENSG00000065911.11	MTHFD2	protein_coding	6285.76	-1.07122	1.1656e-09	3.20938e-08	107.944	methylenetetrahydrofolate dehydrogenase (NADP+ dependent) 2, methenyltetrahydrofolate cyclohydrolase [Source:HGNC Symbol;Acc:HGNC:7434]
ENSG00000065978.17	YBX1	protein_coding	17971.6	-0.592427	4.73126e-06	5.53062e-05	594.006	Y-box binding protein 1 [Source:HGNC Symbol;Acc:HGNC:8014]
ENSG00000066248.14	NGEF	protein_coding	525.131	0.778112	0.00117897	0.00645943	8.62284	neuronal guanine nucleotide exchange factor [Source:HGNC Symbol;Acc:HGNC:7807]
ENSG00000066279.16	ASPM	protein_coding	12501	-0.822772	4.03542e-06	4.81101e-05	84.898	abnormal spindle microtubule assembly [Source:HGNC Symbol;Acc:HGNC:19048]
ENSG00000066468.20	FGFR2	protein_coding	317.303	-1.04865	0.000926967	0.00525108	3.7996	fibroblast growth factor receptor 2 [Source:HGNC Symbol;Acc:HGNC:3689]
ENSG00000066557.5	LRRC40	protein_coding	1747	-0.593914	0.00294383	0.0137351	45.532	leucine rich repeat containing 40 [Source:HGNC Symbol;Acc:HGNC:26004]
ENSG00000066583.11	ISOC1	protein_coding	1115.02	-1.01004	1.70981e-09	4.4938e-08	42.8809	isochorismatase domain containing 1 [Source:HGNC Symbol;Acc:HGNC:24254]
ENSG00000067057.16	PFKP	protein_coding	29491.7	1.38585	5.5533e-30	1.729e-27	447.965	phosphofructokinase, platelet [Source:HGNC Symbol;Acc:HGNC:8878]
ENSG00000067082.14	KLF6	protein_coding	3064.51	0.605308	8.85686e-05	0.000700501	32.9933	Kruppel like factor 6 [Source:HGNC Symbol;Acc:HGNC:2235]
ENSG00000067182.7	TNFRSF1A	protein_coding	14920.1	-0.727924	6.23711e-05	0.000519706	245.469	TNF receptor superfamily member 1A [Source:HGNC Symbol;Acc:HGNC:11916]
ENSG00000067225.17	PKM	protein_coding	390940	1.1533	2.65721e-16	2.41687e-14	3117.95	pyruvate kinase M1/2 [Source:HGNC Symbol;Acc:HGNC:9021]
ENSG00000067248.9	DHX29	protein_coding	6914.95	-0.790156	3.83921e-08	7.48877e-07	103.758	DExH-box helicase 29 [Source:HGNC Symbol;Acc:HGNC:15815]
ENSG00000067334.13	DNTTIP2	protein_coding	4340.57	-0.622459	9.59202e-06	0.000101633	39.1434	deoxynucleotidyltransferase terminal interacting protein 2 [Source:HGNC Symbol;Acc:HGNC:24013]
ENSG00000067533.5	RRP15	protein_coding	2458.72	-0.761687	8.2784e-07	1.16242e-05	22.3554	ribosomal RNA processing 15 homolog [Source:HGNC Symbol;Acc:HGNC:24255]
ENSG00000067840.12	PDZD4	protein_coding	289.784	1.18151	3.69506e-06	4.4412e-05	4.98264	PDZ domain containing 4 [Source:HGNC Symbol;Acc:HGNC:21167]
ENSG00000067992.12	PDK3	protein_coding	1686.43	0.781648	3.83413e-07	5.83956e-06	38.1184	pyruvate dehydrogenase kinase 3 [Source:HGNC Symbol;Acc:HGNC:8811]
ENSG00000068028.17	RASSF1	protein_coding	603.474	0.659041	0.000595999	0.0036018	9.7299	Ras association domain family member 1 [Source:HGNC Symbol;Acc:HGNC:9882]
ENSG00000068305.17	MEF2A	protein_coding	3952.51	0.640659	2.16193e-06	2.74512e-05	34.1126	myocyte enhancer factor 2A [Source:HGNC Symbol;Acc:HGNC:6993]
ENSG00000068354.15	TBC1D25	protein_coding	1051.96	0.657817	0.000255939	0.00175281	14.8259	TBC1 domain family member 25 [Source:HGNC Symbol;Acc:HGNC:8092]
ENSG00000068489.12	PRR11	protein_coding	2875.21	-0.585054	0.00164437	0.00850828	45.3317	proline rich 11 [Source:HGNC Symbol;Acc:HGNC:25619]
ENSG00000068903.19	SIRT2	protein_coding	2781.77	0.870635	5.89145e-07	8.64756e-06	29.3484	sirtuin 2 [Source:HGNC Symbol;Acc:HGNC:10886]
ENSG00000068971.13	PPP2R5B	protein_coding	1169.68	1.33432	3.94046e-12	1.80215e-10	25.4512	protein phosphatase 2 regulatory subunit B'beta [Source:HGNC Symbol;Acc:HGNC:9310]
ENSG00000069275.12	NUCKS1	protein_coding	43215.9	-0.640318	6.37737e-05	0.000529757	445.504	nuclear casein kinase and cyclin dependent kinase substrate 1 [Source:HGNC Symbol;Acc:HGNC:29923]
ENSG00000069493.14	CLEC2D	protein_coding	466.358	1.03236	7.74279e-07	1.09673e-05	4.72115	C-type lectin domain family 2 member D [Source:HGNC Symbol;Acc:HGNC:14351]
ENSG00000069869.15	NEDD4	protein_coding	33246.5	1.50537	2.20321e-13	1.27849e-11	310.556	neural precursor cell expressed, developmentally down-regulated 4, E3 ubiquitin protein ligase [Source:HGNC Symbol;Acc:HGNC:7727]
ENSG00000070087.13	PFN2	protein_coding	6335.62	-0.718511	0.000579538	0.00351544	133.488	profilin 2 [Source:HGNC Symbol;Acc:HGNC:8882]
ENSG00000070182.17	SPTB	protein_coding	1253.48	0.950515	4.91108e-05	0.000421359	6.47954	spectrin beta, erythrocytic [Source:HGNC Symbol;Acc:HGNC:11274]
ENSG00000070371.15	CLTCL1	protein_coding	1885.53	0.973978	3.07381e-10	9.68191e-09	13.1396	clathrin heavy chain like 1 [Source:HGNC Symbol;Acc:HGNC:2093]
ENSG00000070404.9	FSTL3	protein_coding	7239.71	1.46385	2.29537e-29	6.88185e-27	180.888	follistatin like 3 [Source:HGNC Symbol;Acc:HGNC:3973]
ENSG00000070669.16	ASNS	protein_coding	2760.33	-1.74866	1.00333e-23	1.99021e-21	58.5309	asparagine synthetase (glutamine-hydrolyzing) [Source:HGNC Symbol;Acc:HGNC:753]
ENSG00000070785.16	EIF2B3	protein_coding	1021.51	-0.756673	7.10856e-05	0.000581838	24.4191	eukaryotic translation initiation factor 2B subunit gamma [Source:HGNC Symbol;Acc:HGNC:3259]
ENSG00000070814.17	TCOF1	protein_coding	5999.9	-0.726368	1.07707e-07	1.90162e-06	36.9791	treacle ribosome biogenesis factor 1 [Source:HGNC Symbol;Acc:HGNC:11654]
ENSG00000070950.9	RAD18	protein_coding	2133.34	-0.644292	8.43253e-05	0.000670214	21.4573	RAD18, E3 ubiquitin protein ligase [Source:HGNC Symbol;Acc:HGNC:18278]
ENSG00000071539.13	TRIP13	protein_coding	2782.39	-1.03135	9.5683e-12	4.09817e-10	58.8251	thyroid hormone receptor interactor 13 [Source:HGNC Symbol;Acc:HGNC:12307]
ENSG00000072195.14	SPEG	protein_coding	336.786	1.26856	1.83908e-07	3.03514e-06	1.50763	SPEG complex locus [Source:HGNC Symbol;Acc:HGNC:16901]
ENSG00000072210.18	ALDH3A2	protein_coding	20899.7	-0.871724	3.53335e-10	1.09378e-08	227.733	aldehyde dehydrogenase 3 family member A2 [Source:HGNC Symbol;Acc:HGNC:403]
ENSG00000072422.16	RHOBTB1	protein_coding	4954.42	-0.69955	0.00391118	0.0173628	67.9251	Rho related BTB domain containing 1 [Source:HGNC Symbol;Acc:HGNC:18738]
ENSG00000072501.17	SMC1A	protein_coding	15062	-0.774819	6.69997e-09	1.54519e-07	96.7016	structural maintenance of chromosomes 1A [Source:HGNC Symbol;Acc:HGNC:11111]
ENSG00000072571.19	HMMR	protein_coding	4948.47	-1.07001	3.15254e-08	6.27794e-07	104.63	hyaluronan mediated motility receptor [Source:HGNC Symbol;Acc:HGNC:5012]
ENSG00000072682.18	P4HA2	protein_coding	7850.19	1.59458	2.46555e-35	1.02352e-32	70.5299	prolyl 4-hydroxylase subunit alpha 2 [Source:HGNC Symbol;Acc:HGNC:8547]
ENSG00000072858.10	SIDT1	protein_coding	594.253	-0.942728	6.60862e-05	0.000546164	5.56872	SID1 transmembrane family member 1 [Source:HGNC Symbol;Acc:HGNC:25967]
ENSG00000072954.6	TMEM38A	protein_coding	168.594	1.07206	0.000176655	0.0012751	3.91296	transmembrane protein 38A [Source:HGNC Symbol;Acc:HGNC:28462]
ENSG00000073060.15	SCARB1	protein_coding	10551.5	1.04554	8.74088e-10	2.47837e-08	106.038	scavenger receptor class B member 1 [Source:HGNC Symbol;Acc:HGNC:1664]
ENSG00000073111.13	MCM2	protein_coding	6265.77	-1.03298	3.97404e-13	2.17115e-11	96.2857	minichromosome maintenance complex component 2 [Source:HGNC Symbol;Acc:HGNC:6944]
ENSG00000073711.10	PPP2R3A	protein_coding	1127.65	0.657442	0.000234074	0.00162298	9.85521	protein phosphatase 2 regulatory subunit B''alpha [Source:HGNC Symbol;Acc:HGNC:9307]
ENSG00000073969.18	NSF	protein_coding	3130.91	-0.722003	2.16536e-07	3.5198e-06	40.881	N-ethylmaleimide sensitive factor, vesicle fusing ATPase [Source:HGNC Symbol;Acc:HGNC:8016]
ENSG00000074181.8	NOTCH3	protein_coding	1640.57	-0.690383	0.000283428	0.0019129	12.3088	notch 3 [Source:HGNC Symbol;Acc:HGNC:7883]
ENSG00000074410.13	CA12	protein_coding	84134.6	0.676549	6.24428e-05	0.000520036	804.159	carbonic anhydrase 12 [Source:HGNC Symbol;Acc:HGNC:1371]
ENSG00000074416.13	MGLL	protein_coding	8984.94	0.935568	6.72764e-09	1.54717e-07	60.1055	monoglyceride lipase [Source:HGNC Symbol;Acc:HGNC:17038]
ENSG00000074527.11	NTN4	protein_coding	8053.43	0.831458	0.000208185	0.0014686	147.013	netrin 4 [Source:HGNC Symbol;Acc:HGNC:13658]
ENSG00000074582.12	BCS1L	protein_coding	895.004	-0.626934	0.000461075	0.0028967	18.0764	BCS1 homolog, ubiquinol-cytochrome c reductase complex chaperone [Source:HGNC Symbol;Acc:HGNC:1020]
ENSG00000074590.13	NUAK1	protein_coding	3915.16	1.19277	0.00269669	0.0127547	55.2313	NUAK family kinase 1 [Source:HGNC Symbol;Acc:HGNC:14311]
ENSG00000074800.13	ENO1	protein_coding	193514	1.04074	3.18512e-12	1.4678e-10	3335.26	enolase 1 [Source:HGNC Symbol;Acc:HGNC:3350]
ENSG00000074935.13	TUBE1	protein_coding	644.757	-0.712519	0.000761153	0.00445037	7.00915	tubulin epsilon 1 [Source:HGNC Symbol;Acc:HGNC:20775]
ENSG00000075131.9	TIPIN	protein_coding	1154.45	-1.27855	1.56637e-13	9.32335e-12	34.1012	TIMELESS interacting protein [Source:HGNC Symbol;Acc:HGNC:30750]
ENSG00000075188.8	NUP37	protein_coding	2749.32	-0.727513	4.92773e-06	5.73132e-05	57.1346	nucleoporin 37 [Source:HGNC Symbol;Acc:HGNC:29929]
ENSG00000075218.18	GTSE1	protein_coding	1283.87	-0.764912	1.85935e-06	2.40247e-05	20.898	G2 and S-phase expressed 1 [Source:HGNC Symbol;Acc:HGNC:13698]
ENSG00000075336.11	TIMM21	protein_coding	1290.05	-0.971035	2.41605e-09	6.06448e-08	18.3682	translocase of inner mitochondrial membrane 21 [Source:HGNC Symbol;Acc:HGNC:25010]
ENSG00000075399.12	VPS9D1	protein_coding	789.095	1.02093	1.13165e-07	1.98714e-06	15.4132	VPS9 domain containing 1 [Source:HGNC Symbol;Acc:HGNC:13526]
ENSG00000075426.11	FOSL2	protein_coding	12847.2	0.72004	1.06999e-06	1.45695e-05	123.698	FOS like 2, AP-1 transcription factor subunit [Source:HGNC Symbol;Acc:HGNC:3798]
ENSG00000075461.5	CACNG4	protein_coding	737.098	1.37437	1.59727e-14	1.11465e-12	15.9216	calcium voltage-gated channel auxiliary subunit gamma 4 [Source:HGNC Symbol;Acc:HGNC:1408]
ENSG00000075702.16	WDR62	protein_coding	2329.43	-1.13771	5.73233e-10	1.70287e-08	19.0525	WD repeat domain 62 [Source:HGNC Symbol;Acc:HGNC:24502]
ENSG00000076003.4	MCM6	protein_coding	4166.79	-1.11665	1.42119e-11	5.85473e-10	75.1893	minichromosome maintenance complex component 6 [Source:HGNC Symbol;Acc:HGNC:6949]
ENSG00000076067.11	RBMS2	protein_coding	8270.5	0.7853	3.50688e-07	5.40728e-06	63.7892	RNA binding motif single stranded interacting protein 2 [Source:HGNC Symbol;Acc:HGNC:9909]
ENSG00000076344.15	RGS11	protein_coding	412.611	0.882633	0.000425397	0.0027051	6.39378	regulator of G protein signaling 11 [Source:HGNC Symbol;Acc:HGNC:9993]
ENSG00000076382.16	SPAG5	protein_coding	7343.77	-1.03605	2.10234e-12	9.89442e-11	101.967	sperm associated antigen 5 [Source:HGNC Symbol;Acc:HGNC:13452]
ENSG00000076513.16	ANKRD13A	protein_coding	3215.8	1.02863	7.88101e-12	3.42074e-10	29.4409	ankyrin repeat domain 13A [Source:HGNC Symbol;Acc:HGNC:21268]
ENSG00000076641.4	PAG1	protein_coding	159.265	2.20682	1.28522e-09	3.4971e-08	1.74848	phosphoprotein membrane anchor with glycosphingolipid microdomains 1 [Source:HGNC Symbol;Acc:HGNC:30043]
ENSG00000076662.9	ICAM3	protein_coding	216.485	-0.767335	0.00303514	0.0140719	4.97771	intercellular adhesion molecule 3 [Source:HGNC Symbol;Acc:HGNC:5346]
ENSG00000076864.19	RAP1GAP	protein_coding	3352.81	-1.12497	1.81806e-06	2.35663e-05	48.2772	RAP1 GTPase activating protein [Source:HGNC Symbol;Acc:HGNC:9858]
ENSG00000077152.9	UBE2T	protein_coding	2141.6	-0.881554	8.55145e-09	1.92556e-07	147.025	ubiquitin conjugating enzyme E2 T [Source:HGNC Symbol;Acc:HGNC:25009]
ENSG00000078070.11	MCCC1	protein_coding	3273.21	1.17019	3.59831e-13	1.98152e-11	52.9756	methylcrotonoyl-CoA carboxylase 1 [Source:HGNC Symbol;Acc:HGNC:6936]
ENSG00000078114.18	NEBL	protein_coding	4367.26	0.845138	1.99934e-07	3.27957e-06	20.8284	nebulette [Source:HGNC Symbol;Acc:HGNC:16932]
ENSG00000078237.6	TIGAR	protein_coding	1977.39	-0.811947	1.57533e-06	2.06348e-05	34.9284	TP53 induced glycolysis regulatory phosphatase [Source:HGNC Symbol;Acc:HGNC:1185]
ENSG00000078319.8	PMS2P1	unprocessed_pseudogene	368.998	-0.605612	0.00655721	0.0262906	22.7665	PMS1 homolog 2, mismatch repair system component pseudogene 1 [Source:HGNC Symbol;Acc:HGNC:9123]
ENSG00000078804.12	TP53INP2	protein_coding	674.745	0.697767	0.00691404	0.0273889	11.7363	tumor protein p53 inducible nuclear protein 2 [Source:HGNC Symbol;Acc:HGNC:16104]
ENSG00000079156.16	OSBPL6	protein_coding	224.166	-1.1395	4.79182e-05	0.000412657	1.68249	oxysterol binding protein like 6 [Source:HGNC Symbol;Acc:HGNC:16388]
ENSG00000079257.7	LXN	protein_coding	4527.47	-1.11119	9.30425e-09	2.07202e-07	240.095	latexin [Source:HGNC Symbol;Acc:HGNC:13347]
ENSG00000079616.12	KIF22	protein_coding	4411.03	-0.997514	9.62979e-12	4.10238e-10	76.2013	kinesin family member 22 [Source:HGNC Symbol;Acc:HGNC:6391]
ENSG00000079739.15	PGM1	protein_coding	6176.12	0.758024	8.54948e-07	1.1953e-05	102.097	phosphoglucomutase 1 [Source:HGNC Symbol;Acc:HGNC:8905]
ENSG00000080224.17	EPHA6	protein_coding	96.7218	0.919932	0.0134091	0.0466064	1.44569	EPH receptor A6 [Source:HGNC Symbol;Acc:HGNC:19296]
ENSG00000080546.13	SESN1	protein_coding	858.9	-0.779313	7.69299e-06	8.42689e-05	11.7288	sestrin 1 [Source:HGNC Symbol;Acc:HGNC:21595]
ENSG00000080608.9	PUM3	protein_coding	4411.54	-0.656658	5.1157e-06	5.92864e-05	112.324	pumilio RNA binding family member 3 [Source:HGNC Symbol;Acc:HGNC:29676]
ENSG00000080824.18	HSP90AA1	protein_coding	92372.5	-0.988512	4.5708e-13	2.44603e-11	1301.64	heat shock protein 90 alpha family class A member 1 [Source:HGNC Symbol;Acc:HGNC:5253]
ENSG00000080839.11	RBL1	protein_coding	3112.11	-0.7422	1.53226e-05	0.000153226	38.9218	RB transcriptional corepressor like 1 [Source:HGNC Symbol;Acc:HGNC:9893]
ENSG00000080986.12	NDC80	protein_coding	1052.18	-1.12258	8.5774e-09	1.92872e-07	22.4686	NDC80, kinetochore complex component [Source:HGNC Symbol;Acc:HGNC:16909]
ENSG00000081181.7	ARG2	protein_coding	309.989	1.46244	1.8236e-05	0.000179151	12.9256	arginase 2 [Source:HGNC Symbol;Acc:HGNC:664]
ENSG00000082213.17	C5orf22	protein_coding	1744.4	-0.694029	4.76688e-05	0.000411165	28.139	chromosome 5 open reading frame 22 [Source:HGNC Symbol;Acc:HGNC:25639]
ENSG00000082497.11	SERTAD4	protein_coding	260.394	0.912076	0.00109275	0.00603396	3.74953	SERTA domain containing 4 [Source:HGNC Symbol;Acc:HGNC:25236]
ENSG00000082516.8	GEMIN5	protein_coding	4783.64	-0.633205	2.78573e-06	3.44545e-05	56.6944	gem nuclear organelle associated protein 5 [Source:HGNC Symbol;Acc:HGNC:20043]
ENSG00000082684.14	SEMA5B	protein_coding	83.3112	3.35192	8.40548e-14	5.17433e-12	1.81125	semaphorin 5B [Source:HGNC Symbol;Acc:HGNC:10737]
ENSG00000083290.19	ULK2	protein_coding	4072.28	0.674849	6.3733e-06	7.20054e-05	27.9303	unc-51 like autophagy activating kinase 2 [Source:HGNC Symbol;Acc:HGNC:13480]
ENSG00000083635.7	NUFIP1	protein_coding	664.822	-0.703354	0.000283184	0.0019129	13.6283	NUFIP1, FMR1 interacting protein 1 [Source:HGNC Symbol;Acc:HGNC:8057]
ENSG00000083750.12	RRAGB	protein_coding	1329.1	0.586518	0.000467585	0.00293419	29.0096	Ras related GTP binding B [Source:HGNC Symbol;Acc:HGNC:19901]
ENSG00000083844.10	ZNF264	protein_coding	2475.43	0.62719	2.84725e-05	0.000263713	12.8713	zinc finger protein 264 [Source:HGNC Symbol;Acc:HGNC:13057]
ENSG00000084073.8	ZMPSTE24	protein_coding	6458.24	-0.606546	0.000173889	0.0012585	122.98	zinc metallopeptidase STE24 [Source:HGNC Symbol;Acc:HGNC:12877]
ENSG00000084731.13	KIF3C	protein_coding	6308.83	0.718665	0.00136895	0.00732186	72.1441	kinesin family member 3C [Source:HGNC Symbol;Acc:HGNC:6321]
ENSG00000084733.10	RAB10	protein_coding	17666.7	-0.672961	4.51767e-06	5.3271e-05	342.717	RAB10, member RAS oncogene family [Source:HGNC Symbol;Acc:HGNC:9759]
ENSG00000085063.14	CD59	protein_coding	16099.6	0.658091	3.30682e-07	5.14288e-06	207.335	CD59 molecule (CD59 blood group) [Source:HGNC Symbol;Acc:HGNC:1689]
ENSG00000085415.15	SEH1L	protein_coding	2447.3	-0.588795	0.000161886	0.00118433	15.7414	SEH1 like nucleoporin [Source:HGNC Symbol;Acc:HGNC:30379]
ENSG00000085644.13	ZNF213	protein_coding	380.872	-0.624366	0.00545799	0.0227334	3.76266	zinc finger protein 213 [Source:HGNC Symbol;Acc:HGNC:13005]
ENSG00000085721.12	RRN3	protein_coding	4436.05	-0.595555	1.55788e-05	0.000155404	70.8823	RRN3 homolog, RNA polymerase I transcription factor [Source:HGNC Symbol;Acc:HGNC:30346]
ENSG00000085840.12	ORC1	protein_coding	1632.74	-1.06139	3.22415e-10	1.00576e-08	39.9668	origin recognition complex subunit 1 [Source:HGNC Symbol;Acc:HGNC:8487]
ENSG00000085872.14	CHERP	protein_coding	872.153	-0.850479	6.93688e-05	0.000570381	11.0602	calcium homeostasis endoplasmic reticulum protein [Source:HGNC Symbol;Acc:HGNC:16930]
ENSG00000085982.13	USP40	protein_coding	4941.79	-0.605516	3.76516e-06	4.5154e-05	34.1549	ubiquitin specific peptidase 40 [Source:HGNC Symbol;Acc:HGNC:20069]
ENSG00000085999.11	RAD54L	protein_coding	593.518	-1.32326	1.63989e-11	6.67079e-10	15.0377	RAD54 like [Source:HGNC Symbol;Acc:HGNC:9826]
ENSG00000086189.9	DIMT1	protein_coding	1322.4	-0.607099	0.00280636	0.0131772	24.9176	DIM1 dimethyladenosine transferase 1 homolog [Source:HGNC Symbol;Acc:HGNC:30217]
ENSG00000086200.16	IPO11	protein_coding	2392.41	-0.836902	4.39393e-07	6.61746e-06	23.8409	importin 11 [Source:HGNC Symbol;Acc:HGNC:20628]
ENSG00000086548.8	CEACAM6	protein_coding	31828.4	-0.991744	1.44149e-07	2.4463e-06	818.428	carcinoembryonic antigen related cell adhesion molecule 6 [Source:HGNC Symbol;Acc:HGNC:1818]
ENSG00000087074.7	PPP1R15A	protein_coding	2197.77	0.680199	2.04042e-05	0.000196167	42.8422	protein phosphatase 1 regulatory subunit 15A [Source:HGNC Symbol;Acc:HGNC:14375]
ENSG00000087086.13	FTL	protein_coding	280727	-0.639533	1.16157e-07	2.01996e-06	20228.5	ferritin light chain [Source:HGNC Symbol;Acc:HGNC:3999]
ENSG00000087087.18	SRRT	protein_coding	5477.94	-0.603403	0.000440306	0.00278895	75.981	serrate, RNA effector molecule [Source:HGNC Symbol;Acc:HGNC:24101]
ENSG00000087088.19	BAX	protein_coding	4859.22	-0.690645	7.49481e-06	8.22651e-05	122.729	BCL2 associated X, apoptosis regulator [Source:HGNC Symbol;Acc:HGNC:959]
ENSG00000087191.12	PSMC5	protein_coding	3810.26	-0.843207	1.33693e-09	3.62561e-08	57.3891	proteasome 26S subunit, ATPase 5 [Source:HGNC Symbol;Acc:HGNC:9552]
ENSG00000087266.15	SH3BP2	protein_coding	2085.68	1.37566	2.70933e-07	4.29198e-06	15.4354	SH3 domain binding protein 2 [Source:HGNC Symbol;Acc:HGNC:10825]
ENSG00000087299.11	L2HGDH	protein_coding	1102.83	-1.03768	5.09475e-10	1.53031e-08	11.9064	L-2-hydroxyglutarate dehydrogenase [Source:HGNC Symbol;Acc:HGNC:20499]
ENSG00000087586.17	AURKA	protein_coding	6058.02	-1.14263	2.95962e-16	2.6059e-14	160.651	aurora kinase A [Source:HGNC Symbol;Acc:HGNC:11393]
ENSG00000087842.10	PIR	protein_coding	4307.2	-0.739609	1.1206e-06	1.51314e-05	117.655	pirin [Source:HGNC Symbol;Acc:HGNC:30048]
ENSG00000088002.11	SULT2B1	protein_coding	1553.71	0.75122	1.11617e-05	0.000116136	38.5403	sulfotransferase family 2B member 1 [Source:HGNC Symbol;Acc:HGNC:11459]
ENSG00000088035.15	ALG6	protein_coding	872.198	-0.724652	0.000538631	0.00331198	13.3668	ALG6, alpha-1,3-glucosyltransferase [Source:HGNC Symbol;Acc:HGNC:23157]
ENSG00000088038.17	CNOT3	protein_coding	2172.25	-0.680573	4.05229e-06	4.82757e-05	20.9205	CCR4-NOT transcription complex subunit 3 [Source:HGNC Symbol;Acc:HGNC:7879]
ENSG00000088247.15	KHSRP	protein_coding	5279.88	-0.655728	1.1051e-06	1.4972e-05	76.7962	KH-type splicing regulatory protein [Source:HGNC Symbol;Acc:HGNC:6316]
ENSG00000088325.15	TPX2	protein_coding	12339.8	-0.927535	1.17422e-10	4.04481e-09	244.377	TPX2, microtubule nucleation factor [Source:HGNC Symbol;Acc:HGNC:1249]
ENSG00000088340.15	FER1L4	unitary_pseudogene	1446.14	1.93629	8.19343e-32	2.88373e-29	13.1334	fer-1 like family member 4, pseudogene [Source:HGNC Symbol;Acc:HGNC:15801]
ENSG00000088543.14	C3orf18	protein_coding	525.001	0.614128	0.00725643	0.0284115	10.5315	chromosome 3 open reading frame 18 [Source:HGNC Symbol;Acc:HGNC:24837]
ENSG00000088727.12	KIF9	protein_coding	421.367	-0.729034	0.000564128	0.0034452	5.02124	kinesin family member 9 [Source:HGNC Symbol;Acc:HGNC:16666]
ENSG00000088854.12	C20orf194	protein_coding	2719.48	0.929393	2.04588e-09	5.22441e-08	20.8055	chromosome 20 open reading frame 194 [Source:HGNC Symbol;Acc:HGNC:17721]
ENSG00000088881.20	EBF4	protein_coding	532.977	0.701306	0.00152939	0.00802099	9.64781	early B-cell factor 4 [Source:HGNC Symbol;Acc:HGNC:29278]
ENSG00000088899.14	RP5-1187M17.10	protein_coding	1296.69	1.46452	2.96161e-16	2.6059e-14	18.157	leucine zipper tumor suppressor family member 3 [Source:HGNC Symbol;Acc:HGNC:30139]
ENSG00000089048.14	ESF1	protein_coding	3361.5	-0.869203	1.42642e-08	3.0669e-07	76.4364	ESF1 nucleolar pre-rRNA processing protein homolog [Source:HGNC Symbol;Acc:HGNC:15898]
ENSG00000089057.14	SLC23A2	protein_coding	12947.5	-0.640756	4.90598e-05	0.000421144	114.431	solute carrier family 23 member 2 [Source:HGNC Symbol;Acc:HGNC:10973]
ENSG00000089280.18	FUS	protein_coding	5465.32	-1.03484	2.36418e-12	1.10625e-10	40.5122	FUS RNA binding protein [Source:HGNC Symbol;Acc:HGNC:4010]
ENSG00000089685.14	BIRC5	protein_coding	6237.42	-1.08318	3.67892e-14	2.38247e-12	124.352	baculoviral IAP repeat containing 5 [Source:HGNC Symbol;Acc:HGNC:593]
ENSG00000089775.11	ZBTB25	protein_coding	2711.51	0.705218	2.58234e-06	3.23342e-05	13.7528	zinc finger and BTB domain containing 25 [Source:HGNC Symbol;Acc:HGNC:13112]
ENSG00000089820.15	ARHGAP4	protein_coding	284.829	1.48114	1.13804e-09	3.14418e-08	3.70364	Rho GTPase activating protein 4 [Source:HGNC Symbol;Acc:HGNC:674]
ENSG00000089847.12	ANKRD24	protein_coding	78.6723	1.05551	0.00360421	0.0162099	1.34373	ankyrin repeat domain 24 [Source:HGNC Symbol;Acc:HGNC:29424]
ENSG00000089876.11	DHX32	protein_coding	7325.76	0.720066	0.000167709	0.00122197	127.655	DEAH-box helicase 32 (putative) [Source:HGNC Symbol;Acc:HGNC:16717]
ENSG00000090061.17	CCNK	protein_coding	1311.63	-0.770807	8.16828e-06	8.86356e-05	10.6061	cyclin K [Source:HGNC Symbol;Acc:HGNC:1596]
ENSG00000090097.20	PCBP4	protein_coding	886.379	0.678437	0.000105649	0.000819974	15.5943	poly(rC) binding protein 4 [Source:HGNC Symbol;Acc:HGNC:8652]
ENSG00000090238.11	YPEL3	protein_coding	399.017	1.14226	5.68931e-07	8.38889e-06	9.36246	yippee like 3 [Source:HGNC Symbol;Acc:HGNC:18327]
ENSG00000090273.13	NUDC	protein_coding	3919.23	-0.821399	9.25338e-09	2.06353e-07	94.6172	nuclear distribution C, dynein complex regulator [Source:HGNC Symbol;Acc:HGNC:8045]
ENSG00000090339.8	ICAM1	protein_coding	116.847	1.22247	0.000933834	0.00528259	2.8569	intercellular adhesion molecule 1 [Source:HGNC Symbol;Acc:HGNC:5344]
ENSG00000090520.10	DNAJB11	protein_coding	4709.5	-0.974021	2.66912e-13	1.51625e-11	56.8935	DnaJ heat shock protein family (Hsp40) member B11 [Source:HGNC Symbol;Acc:HGNC:14889]
ENSG00000090539.15	CHRD	protein_coding	82.1477	1.80356	1.4778e-06	1.94834e-05	1.19951	chordin [Source:HGNC Symbol;Acc:HGNC:1949]
ENSG00000090581.9	GNPTG	protein_coding	1723.92	0.643133	7.09559e-05	0.000581365	26.5715	N-acetylglucosamine-1-phosphate transferase gamma subunit [Source:HGNC Symbol;Acc:HGNC:23026]
ENSG00000090674.15	MCOLN1	protein_coding	243.567	-0.677622	0.0130627	0.0456377	4.23716	mucolipin 1 [Source:HGNC Symbol;Acc:HGNC:13356]
ENSG00000090861.15	AARS	protein_coding	18934.2	-0.7222	4.69322e-06	5.49806e-05	283.668	alanyl-tRNA synthetase [Source:HGNC Symbol;Acc:HGNC:20]
ENSG00000090889.11	KIF4A	protein_coding	3794.03	-1.00129	3.19616e-11	1.24091e-09	60.8421	kinesin family member 4A [Source:HGNC Symbol;Acc:HGNC:13339]
ENSG00000091140.12	DLD	protein_coding	6038.07	-0.679891	1.33962e-06	1.7792e-05	77.7978	dihydrolipoamide dehydrogenase [Source:HGNC Symbol;Acc:HGNC:2898]
ENSG00000091428.17	RAPGEF4	protein_coding	258.062	1.00167	6.93165e-05	0.000570241	2.6699	Rap guanine nucleotide exchange factor 4 [Source:HGNC Symbol;Acc:HGNC:16626]
ENSG00000091436.16	AC013461.1	protein_coding	9675.19	-0.751359	7.02971e-05	0.000576426	52.0441	mitogen-activated protein kinase kinase kinase 20 [Source:HGNC Symbol;Acc:HGNC:17797]
ENSG00000091622.15	PITPNM3	protein_coding	456.137	0.995786	0.000124122	0.000948339	3.589	PITPNM family member 3 [Source:HGNC Symbol;Acc:HGNC:21043]
ENSG00000091651.8	ORC6	protein_coding	1346.8	-0.883861	2.1413e-06	2.7233e-05	24.387	origin recognition complex subunit 6 [Source:HGNC Symbol;Acc:HGNC:17151]
ENSG00000092140.14	G2E3	protein_coding	2790.43	-0.757291	0.000896127	0.00509957	24.3696	G2/M-phase specific E3 ubiquitin protein ligase [Source:HGNC Symbol;Acc:HGNC:20338]
ENSG00000092201.9	SUPT16H	protein_coding	17389	-0.707512	3.12183e-08	6.22443e-07	161.712	SPT16 homolog, facilitates chromatin remodeling subunit [Source:HGNC Symbol;Acc:HGNC:11465]
ENSG00000092470.11	WDR76	protein_coding	2017.93	-1.03821	1.81937e-11	7.34554e-10	37.4515	WD repeat domain 76 [Source:HGNC Symbol;Acc:HGNC:25773]
ENSG00000092621.11	PHGDH	protein_coding	2273.87	-1.59443	9.18124e-17	9.00875e-15	37.0687	phosphoglycerate dehydrogenase [Source:HGNC Symbol;Acc:HGNC:8923]
ENSG00000092841.18	MYL6	protein_coding	43204.5	0.993318	1.16084e-13	7.06544e-12	605.162	myosin light chain 6 [Source:HGNC Symbol;Acc:HGNC:7587]
ENSG00000092853.13	CLSPN	protein_coding	2124.02	-1.43498	1.1479e-18	1.37663e-16	33.3203	claspin [Source:HGNC Symbol;Acc:HGNC:19715]
ENSG00000092929.11	UNC13D	protein_coding	1001.34	1.10422	7.65132e-10	2.22023e-08	9.78091	unc-13 homolog D [Source:HGNC Symbol;Acc:HGNC:23147]
ENSG00000092964.16	DPYSL2	protein_coding	41284.3	1.07041	2.36126e-09	5.9408e-08	431.58	dihydropyrimidinase like 2 [Source:HGNC Symbol;Acc:HGNC:3014]
ENSG00000093009.9	CDC45	protein_coding	1336.33	-1.09948	7.51994e-12	3.28161e-10	35.6442	cell division cycle 45 [Source:HGNC Symbol;Acc:HGNC:1739]
ENSG00000093217.9	XYLB	protein_coding	457.043	-0.824055	8.96383e-05	0.000707924	5.94133	xylulokinase [Source:HGNC Symbol;Acc:HGNC:12839]
ENSG00000094804.9	CDC6	protein_coding	4926.83	-1.05789	9.12198e-12	3.91737e-10	75.3945	cell division cycle 6 [Source:HGNC Symbol;Acc:HGNC:1744]
ENSG00000095002.12	MSH2	protein_coding	4630.31	-0.639178	4.37407e-05	0.00038279	72.5364	mutS homolog 2 [Source:HGNC Symbol;Acc:HGNC:7325]
ENSG00000095015.5	MAP3K1	protein_coding	4965.98	0.590924	7.1795e-05	0.000586163	38.1641	mitogen-activated protein kinase kinase kinase 1 [Source:HGNC Symbol;Acc:HGNC:6848]
ENSG00000095066.11	HOOK2	protein_coding	837.805	0.873749	5.05284e-07	7.51889e-06	9.44844	hook microtubule tethering protein 2 [Source:HGNC Symbol;Acc:HGNC:19885]
ENSG00000095303.14	PTGS1	protein_coding	315.482	1.86275	1.48344e-07	2.51485e-06	7.32157	prostaglandin-endoperoxide synthase 1 [Source:HGNC Symbol;Acc:HGNC:9604]
ENSG00000095319.14	NUP188	protein_coding	4631.24	-0.720746	1.62046e-07	2.71305e-06	39.3052	nucleoporin 188 [Source:HGNC Symbol;Acc:HGNC:17859]
ENSG00000095637.21	SORBS1	protein_coding	201.692	-1.16579	3.63443e-05	0.000325991	1.42996	sorbin and SH3 domain containing 1 [Source:HGNC Symbol;Acc:HGNC:14565]
ENSG00000095752.6	IL11	protein_coding	880.02	1.3997	8.02055e-10	2.30644e-08	29.6749	interleukin 11 [Source:HGNC Symbol;Acc:HGNC:5966]
ENSG00000096006.11	CRISP3	protein_coding	75.1523	-1.68383	4.8618e-05	0.000418238	4.23339	cysteine rich secretory protein 3 [Source:HGNC Symbol;Acc:HGNC:16904]
ENSG00000096060.14	FKBP5	protein_coding	1148.28	-1.1715	0.00449534	0.0194598	25.5597	FK506 binding protein 5 [Source:HGNC Symbol;Acc:HGNC:3721]
ENSG00000096696.13	DSP	protein_coding	27944	0.903097	1.29478e-07	2.22295e-06	208.85	desmoplakin [Source:HGNC Symbol;Acc:HGNC:3052]
ENSG00000096717.11	SIRT1	protein_coding	2930.21	-0.636536	5.27382e-05	0.000448441	44.8394	sirtuin 1 [Source:HGNC Symbol;Acc:HGNC:14929]
ENSG00000096746.17	HNRNPH3	protein_coding	2732.42	-1.26915	1.2743e-14	9.00914e-13	40.9984	heterogeneous nuclear ribonucleoprotein H3 [Source:HGNC Symbol;Acc:HGNC:5043]
ENSG00000097021.19	ACOT7	protein_coding	1576.21	-0.746748	8.02498e-07	1.13076e-05	25.2343	acyl-CoA thioesterase 7 [Source:HGNC Symbol;Acc:HGNC:24157]
ENSG00000097046.12	CDC7	protein_coding	1197.93	-1.07543	2.06646e-07	3.37965e-06	26.9102	cell division cycle 7 [Source:HGNC Symbol;Acc:HGNC:1745]
ENSG00000099308.10	MAST3	protein_coding	532.846	-0.704565	0.000459235	0.00289163	5.39906	microtubule associated serine/threonine kinase 3 [Source:HGNC Symbol;Acc:HGNC:19036]
ENSG00000099338.22	CATSPERG	protein_coding	129.418	0.925375	0.00336831	0.0153225	1.10758	cation channel sperm associated auxiliary subunit gamma [Source:HGNC Symbol;Acc:HGNC:25243]
ENSG00000099377.13	HSD3B7	protein_coding	2660.61	1.1846	1.0474e-07	1.8553e-06	83.3003	hydroxy-delta-5-steroid dehydrogenase, 3 beta- and steroid delta-isomerase 7 [Source:HGNC Symbol;Acc:HGNC:18324]
ENSG00000099783.11	HNRNPM	protein_coding	6718.54	-0.943579	5.70353e-10	1.69743e-08	86.9156	heterogeneous nuclear ribonucleoprotein M [Source:HGNC Symbol;Acc:HGNC:5046]
ENSG00000099785.10	2002-03-01	protein_coding	1668.98	0.896923	2.68257e-07	4.25791e-06	49.7308	membrane associated ring-CH-type finger 2 [Source:HGNC Symbol;Acc:HGNC:28038]
ENSG00000099822.2	HCN2	protein_coding	1074.21	0.995393	4.69648e-07	7.02735e-06	24.1148	hyperpolarization activated cyclic nucleotide gated potassium and sodium channel 2 [Source:HGNC Symbol;Acc:HGNC:4846]
ENSG00000099840.13	IZUMO4	protein_coding	44.7709	1.0516	0.00888901	0.0334555	1.37798	IZUMO family member 4 [Source:HGNC Symbol;Acc:HGNC:26950]
ENSG00000099849.14	RASSF7	protein_coding	4275.51	1.0185	7.71724e-10	2.2351e-08	122.139	Ras association domain family member 7 [Source:HGNC Symbol;Acc:HGNC:1166]
ENSG00000099860.8	GADD45B	protein_coding	1159.87	0.927919	2.15477e-05	0.000205331	38.6648	growth arrest and DNA damage inducible beta [Source:HGNC Symbol;Acc:HGNC:4096]
ENSG00000099875.14	MKNK2	protein_coding	4518.67	-0.59606	0.000120515	0.000922962	58.1358	MAP kinase interacting serine/threonine kinase 2 [Source:HGNC Symbol;Acc:HGNC:7111]
ENSG00000099901.16	RANBP1	protein_coding	4740.96	-0.776	3.66897e-09	8.91901e-08	67.8073	RAN binding protein 1 [Source:HGNC Symbol;Acc:HGNC:9847]
ENSG00000099994.10	SUSD2	protein_coding	1106.05	-1.19009	4.46233e-10	1.35544e-08	16.1212	sushi domain containing 2 [Source:HGNC Symbol;Acc:HGNC:30667]
ENSG00000099995.18	SF3A1	protein_coding	3775.81	-0.683254	1.40185e-05	0.00014185	38.7302	splicing factor 3a subunit 1 [Source:HGNC Symbol;Acc:HGNC:10765]
ENSG00000099999.14	RNF215	protein_coding	1918.26	0.647574	0.000409109	0.00261819	11.3122	ring finger protein 215 [Source:HGNC Symbol;Acc:HGNC:33434]
ENSG00000100003.17	SEC14L2	protein_coding	534.729	0.910377	4.35918e-05	0.000381693	6.80278	SEC14 like lipid binding 2 [Source:HGNC Symbol;Acc:HGNC:10699]
ENSG00000100027.14	YPEL1	protein_coding	175.737	1.27924	0.000211401	0.00148614	3.91945	yippee like 1 [Source:HGNC Symbol;Acc:HGNC:12845]
ENSG00000100028.11	SNRPD3	protein_coding	4176.36	-0.612988	3.5942e-06	4.33665e-05	105.212	small nuclear ribonucleoprotein D3 polypeptide [Source:HGNC Symbol;Acc:HGNC:11160]
ENSG00000100060.17	MFNG	protein_coding	155.568	1.04048	0.000321852	0.00213295	3.43256	MFNG O-fucosylpeptide 3-beta-N-acetylglucosaminyltransferase [Source:HGNC Symbol;Acc:HGNC:7038]
ENSG00000100092.20	SH3BP1	protein_coding	147.188	-0.938322	0.00432912	0.0188562	1.822	SH3 domain binding protein 1 [Source:HGNC Symbol;Acc:HGNC:10824]
ENSG00000100116.16	GCAT	protein_coding	136.848	-0.876757	0.0042024	0.0184033	4.76253	glycine C-acetyltransferase [Source:HGNC Symbol;Acc:HGNC:4188]
ENSG00000100139.13	MICALL1	protein_coding	1884.36	0.707477	0.00195918	0.00982016	22.9265	MICAL like 1 [Source:HGNC Symbol;Acc:HGNC:29804]
ENSG00000100147.13	CCDC134	protein_coding	328.238	-0.6092	0.0095929	0.0356295	17.0291	coiled-coil domain containing 134 [Source:HGNC Symbol;Acc:HGNC:26185]
ENSG00000100162.14	CENPM	protein_coding	643.993	-0.975493	2.12274e-07	3.46094e-06	26.3445	centromere protein M [Source:HGNC Symbol;Acc:HGNC:18352]
ENSG00000100206.9	DMC1	protein_coding	164.321	-0.761955	0.0107807	0.039196	4.33566	DNA meiotic recombinase 1 [Source:HGNC Symbol;Acc:HGNC:2927]
ENSG00000100219.16	XBP1	protein_coding	11834.9	-1.21305	4.82187e-11	1.80291e-09	303.367	X-box binding protein 1 [Source:HGNC Symbol;Acc:HGNC:12801]
ENSG00000100234.11	TIMP3	protein_coding	68.809	1.47243	0.000386982	0.00249693	2.13429	TIMP metallopeptidase inhibitor 3 [Source:HGNC Symbol;Acc:HGNC:11822]
ENSG00000100281.13	HMGXB4	protein_coding	1472.99	-0.766622	4.38725e-06	5.18464e-05	16.3734	HMG-box containing 4 [Source:HGNC Symbol;Acc:HGNC:5003]
ENSG00000100297.15	MCM5	protein_coding	6721.87	-0.826611	9.38274e-10	2.64646e-08	64.132	minichromosome maintenance complex component 5 [Source:HGNC Symbol;Acc:HGNC:6948]
ENSG00000100299.17	ARSA	protein_coding	1375.05	0.617299	0.000193815	0.00137807	27.3782	arylsulfatase A [Source:HGNC Symbol;Acc:HGNC:713]
ENSG00000100311.16	PDGFB	protein_coding	736.843	2.43975	3.92039e-34	1.51122e-31	16.4576	platelet derived growth factor subunit B [Source:HGNC Symbol;Acc:HGNC:8800]
ENSG00000100325.14	ASCC2	protein_coding	1846.98	-0.627313	4.28379e-05	0.000376314	22.258	activating signal cointegrator 1 complex subunit 2 [Source:HGNC Symbol;Acc:HGNC:24103]
ENSG00000100345.20	MYH9	protein_coding	51508.3	0.78401	1.59628e-07	2.67533e-06	408.573	myosin heavy chain 9 [Source:HGNC Symbol;Acc:HGNC:7579]
ENSG00000100350.14	FOXRED2	protein_coding	1682.83	-0.857657	1.60169e-08	3.41202e-07	20.4844	FAD dependent oxidoreductase domain containing 2 [Source:HGNC Symbol;Acc:HGNC:26264]
ENSG00000100442.10	FKBP3	protein_coding	5013	-0.590232	0.00068089	0.0040374	149.686	FK506 binding protein 3 [Source:HGNC Symbol;Acc:HGNC:3719]
ENSG00000100462.15	PRMT5	protein_coding	5812.67	-0.682372	2.93329e-07	4.61067e-06	108.177	protein arginine methyltransferase 5 [Source:HGNC Symbol;Acc:HGNC:10894]
ENSG00000100479.12	POLE2	protein_coding	793.985	-1.46361	4.75782e-14	3.05671e-12	23.3331	DNA polymerase epsilon 2, accessory subunit [Source:HGNC Symbol;Acc:HGNC:9178]
ENSG00000100504.16	PYGL	protein_coding	9806.76	0.860641	8.11154e-10	2.32435e-08	127.728	glycogen phosphorylase L [Source:HGNC Symbol;Acc:HGNC:9725]
ENSG00000100522.8	GNPNAT1	protein_coding	4899.87	-0.904609	2.7302e-10	8.66703e-09	89.8121	glucosamine-phosphate N-acetyltransferase 1 [Source:HGNC Symbol;Acc:HGNC:19980]
ENSG00000100526.19	CDKN3	protein_coding	1706.75	-0.946114	8.3798e-06	9.04459e-05	71.1014	cyclin dependent kinase inhibitor 3 [Source:HGNC Symbol;Acc:HGNC:1791]
ENSG00000100578.14	KIAA0586	protein_coding	2265.05	-0.609245	5.8925e-05	0.000494298	15.1229	KIAA0586 [Source:HGNC Symbol;Acc:HGNC:19960]
ENSG00000100591.7	AHSA1	protein_coding	10782.1	-0.646856	2.22417e-06	2.81104e-05	240.386	activator of HSP90 ATPase activity 1 [Source:HGNC Symbol;Acc:HGNC:1189]
ENSG00000100592.15	DAAM1	protein_coding	1346.41	0.799225	3.78702e-07	5.77869e-06	8.0328	dishevelled associated activator of morphogenesis 1 [Source:HGNC Symbol;Acc:HGNC:18142]
ENSG00000100593.17	ISM2	protein_coding	49.9827	2.12033	3.93207e-07	5.97187e-06	1.08369	isthmin 2 [Source:HGNC Symbol;Acc:HGNC:23176]
ENSG00000100629.16	CEP128	protein_coding	1312.15	-0.722941	8.09097e-06	8.78557e-05	9.47465	centrosomal protein 128 [Source:HGNC Symbol;Acc:HGNC:20359]
ENSG00000100632.10	ERH	protein_coding	7522.28	-0.659912	9.33074e-07	1.29447e-05	352.179	ERH, mRNA splicing and mitosis factor [Source:HGNC Symbol;Acc:HGNC:3447]
ENSG00000100644.16	HIF1A	protein_coding	36768.9	-1.15256	3.31437e-07	5.14473e-06	528.371	hypoxia inducible factor 1 alpha subunit [Source:HGNC Symbol;Acc:HGNC:4910]
ENSG00000100714.15	MTHFD1	protein_coding	10258	-0.627406	6.81488e-07	9.80737e-06	68.7919	methylenetetrahydrofolate dehydrogenase, cyclohydrolase and formyltetrahydrofolate synthetase 1 [Source:HGNC Symbol;Acc:HGNC:7432]
ENSG00000100911.13	PSME2	protein_coding	4290.05	-0.673	1.15023e-06	1.54798e-05	77.361	proteasome activator subunit 2 [Source:HGNC Symbol;Acc:HGNC:9569]
ENSG00000100941.8	PNN	protein_coding	7298.48	-0.624644	5.97366e-05	0.000500329	111.244	pinin, desmosome associated protein [Source:HGNC Symbol;Acc:HGNC:9162]
ENSG00000101003.9	GINS1	protein_coding	4685.38	-0.916453	7.59457e-10	2.21144e-08	85.1802	GINS complex subunit 1 [Source:HGNC Symbol;Acc:HGNC:28980]
ENSG00000101004.14	NINL	protein_coding	3782.93	0.627752	6.59069e-05	0.000544961	38.4817	ninein like [Source:HGNC Symbol;Acc:HGNC:29163]
ENSG00000101057.15	MYBL2	protein_coding	3441.78	-0.953496	2.01543e-08	4.23764e-07	95.7857	MYB proto-oncogene like 2 [Source:HGNC Symbol;Acc:HGNC:7548]
ENSG00000101096.19	NFATC2	protein_coding	279.601	-1.32376	4.33118e-07	6.53512e-06	2.753	nuclear factor of activated T-cells 2 [Source:HGNC Symbol;Acc:HGNC:7776]
ENSG00000101187.15	SLCO4A1	protein_coding	2918.08	1.24934	0.00218698	0.010749	94.4908	solute carrier organic anion transporter family member 4A1 [Source:HGNC Symbol;Acc:HGNC:10953]
ENSG00000101197.12	BIRC7	protein_coding	324.801	0.976246	0.000154429	0.00113594	16.5928	baculoviral IAP repeat containing 7 [Source:HGNC Symbol;Acc:HGNC:13702]
ENSG00000101210.10	EEF1A2	protein_coding	7497.34	0.787978	2.97636e-06	3.67281e-05	314.039	eukaryotic translation elongation factor 1 alpha 2 [Source:HGNC Symbol;Acc:HGNC:3192]
ENSG00000101213.6	PTK6	protein_coding	234.085	1.50334	1.17802e-07	2.04636e-06	7.09022	protein tyrosine kinase 6 [Source:HGNC Symbol;Acc:HGNC:9617]
ENSG00000101224.17	CDC25B	protein_coding	8325.88	-0.769849	1.08472e-09	3.01228e-08	139.797	cell division cycle 25B [Source:HGNC Symbol;Acc:HGNC:1726]
ENSG00000101236.16	RNF24	protein_coding	3094.41	1.33028	1.10277e-14	7.86515e-13	29.7461	ring finger protein 24 [Source:HGNC Symbol;Acc:HGNC:13779]
ENSG00000101255.10	TRIB3	protein_coding	6715.42	1.15102	9.0667e-07	1.26325e-05	163.543	tribbles pseudokinase 3 [Source:HGNC Symbol;Acc:HGNC:16228]
ENSG00000101276.14	SLC52A3	protein_coding	286.914	0.998595	0.00111349	0.00613804	6.86731	solute carrier family 52 member 3 [Source:HGNC Symbol;Acc:HGNC:16187]
ENSG00000101353.14	MROH8	protein_coding	218.909	0.706337	0.0114626	0.0411575	4.13257	maestro heat like repeat family member 8 [Source:HGNC Symbol;Acc:HGNC:16125]
ENSG00000101361.14	NOP56	protein_coding	10497.6	-0.709904	2.26988e-08	4.69341e-07	126.888	NOP56 ribonucleoprotein [Source:HGNC Symbol;Acc:HGNC:15911]
ENSG00000101363.12	MANBAL	protein_coding	1772.21	-0.665204	2.88013e-05	0.000266149	56.9477	mannosidase beta like [Source:HGNC Symbol;Acc:HGNC:15799]
ENSG00000101400.5	SNTA1	protein_coding	1002.34	1.07962	8.53721e-10	2.42487e-08	30.6443	syntrophin alpha 1 [Source:HGNC Symbol;Acc:HGNC:11167]
ENSG00000101412.12	E2F1	protein_coding	1529.81	-0.919372	7.44575e-09	1.70264e-07	43.2662	E2F transcription factor 1 [Source:HGNC Symbol;Acc:HGNC:3113]
ENSG00000101447.13	FAM83D	protein_coding	3857.22	-0.619009	3.33926e-05	0.000302025	105.81	family with sequence similarity 83 member D [Source:HGNC Symbol;Acc:HGNC:16122]
ENSG00000101557.14	USP14	protein_coding	2537.26	-0.6595	0.00109508	0.00604478	27.4655	ubiquitin specific peptidase 14 [Source:HGNC Symbol;Acc:HGNC:12612]
ENSG00000101574.14	METTL4	protein_coding	563.251	-0.710886	0.000767779	0.00448102	7.30408	methyltransferase like 4 [Source:HGNC Symbol;Acc:HGNC:24726]
ENSG00000101608.12	MYL12A	protein_coding	15980.5	0.651027	1.48944e-07	2.51975e-06	298.831	myosin light chain 12A [Source:HGNC Symbol;Acc:HGNC:16701]
ENSG00000101665.8	SMAD7	protein_coding	1649.92	1.1903	3.21353e-15	2.44258e-13	31.0284	SMAD family member 7 [Source:HGNC Symbol;Acc:HGNC:6773]
ENSG00000101782.14	RIOK3	protein_coding	3068.16	0.896632	5.23249e-11	1.9297e-09	38.1505	RIO kinase 3 [Source:HGNC Symbol;Acc:HGNC:11451]
ENSG00000101811.13	CSTF2	protein_coding	2319.91	-0.728778	5.66534e-06	6.4867e-05	74.3931	cleavage stimulation factor subunit 2 [Source:HGNC Symbol;Acc:HGNC:2484]
ENSG00000101846.6	STS	protein_coding	1705.83	1.24074	2.22163e-09	5.63766e-08	22.3513	steroid sulfatase [Source:HGNC Symbol;Acc:HGNC:11425]
ENSG00000101868.10	POLA1	protein_coding	4900.51	-0.774675	2.33551e-07	3.76612e-06	56.354	DNA polymerase alpha 1, catalytic subunit [Source:HGNC Symbol;Acc:HGNC:9173]
ENSG00000101871.14	MID1	protein_coding	20529.6	-0.644816	6.30441e-06	7.13266e-05	186.243	midline 1 [Source:HGNC Symbol;Acc:HGNC:7095]
ENSG00000101928.12	MOSPD1	protein_coding	2258.41	0.994386	2.45534e-07	3.93195e-06	60.8544	motile sperm domain containing 1 [Source:HGNC Symbol;Acc:HGNC:25235]
ENSG00000101935.9	AMMECR1	protein_coding	2124.53	-0.637857	0.000220912	0.00154429	21.6231	Alport syndrome, mental retardation, midface hypoplasia and elliptocytosis chromosomal region gene 1 [Source:HGNC Symbol;Acc:HGNC:467]
ENSG00000101945.16	SUV39H1	protein_coding	1304.17	-0.746396	1.70994e-06	2.22361e-05	28.0824	suppressor of variegation 3-9 homolog 1 [Source:HGNC Symbol;Acc:HGNC:11479]
ENSG00000101955.14	SRPX	protein_coding	767.688	0.924014	1.00892e-06	1.38428e-05	24.8925	sushi repeat containing protein, X-linked [Source:HGNC Symbol;Acc:HGNC:11309]
ENSG00000102109.8	PCSK1N	protein_coding	761.349	1.08339	1.16055e-05	0.000120213	38.989	proprotein convertase subtilisin/kexin type 1 inhibitor [Source:HGNC Symbol;Acc:HGNC:17301]
ENSG00000102144.13	PGK1	protein_coding	156502	2.26842	5.62156e-66	8.27391e-63	2405.29	phosphoglycerate kinase 1 [Source:HGNC Symbol;Acc:HGNC:8896]
ENSG00000102241.11	HTATSF1	protein_coding	6283.1	-0.595297	1.24034e-05	0.000127498	131.652	HIV-1 Tat specific factor 1 [Source:HGNC Symbol;Acc:HGNC:5276]
ENSG00000102271.13	KLHL4	protein_coding	828.83	0.61141	0.00754212	0.0293668	10.3594	kelch like family member 4 [Source:HGNC Symbol;Acc:HGNC:6355]
ENSG00000102393.9	GLA	protein_coding	4610.75	-0.588865	0.00173222	0.00888051	146.753	galactosidase alpha [Source:HGNC Symbol;Acc:HGNC:4296]
ENSG00000102738.7	MRPS31	protein_coding	1164.82	-0.606797	0.000370634	0.00241083	37.3515	mitochondrial ribosomal protein S31 [Source:HGNC Symbol;Acc:HGNC:16632]
ENSG00000102743.14	SLC25A15	protein_coding	740.497	-0.840417	7.53925e-06	8.26898e-05	28.4999	solute carrier family 25 member 15 [Source:HGNC Symbol;Acc:HGNC:10985]
ENSG00000102871.15	TRADD	protein_coding	1194.74	0.968668	6.49789e-08	1.19275e-06	34.3834	TNFRSF1A associated via death domain [Source:HGNC Symbol;Acc:HGNC:12030]
ENSG00000102878.16	HSF4	protein_coding	575.568	0.729687	0.00178655	0.00912151	12.7542	heat shock transcription factor 4 [Source:HGNC Symbol;Acc:HGNC:5227]
ENSG00000102967.11	DHODH	protein_coding	1174.8	-0.721141	1.16846e-05	0.000120878	11.3335	dihydroorotate dehydrogenase (quinone) [Source:HGNC Symbol;Acc:HGNC:2867]
ENSG00000102978.12	POLR2C	protein_coding	7836.97	-0.625118	1.03386e-06	1.4137e-05	125.094	RNA polymerase II subunit C [Source:HGNC Symbol;Acc:HGNC:9189]
ENSG00000102984.14	ZNF821	protein_coding	437.304	0.908586	0.000190562	0.00135852	9.29169	zinc finger protein 821 [Source:HGNC Symbol;Acc:HGNC:28043]
ENSG00000103018.16	CYB5B	protein_coding	26212.4	-0.728348	4.25734e-06	5.03479e-05	247.823	cytochrome b5 type B [Source:HGNC Symbol;Acc:HGNC:24374]
ENSG00000103034.14	NDRG4	protein_coding	2520.26	1.13855	8.7294e-08	1.56165e-06	20.4306	NDRG family member 4 [Source:HGNC Symbol;Acc:HGNC:14466]
ENSG00000103145.10	HCFC1R1	protein_coding	4721.75	1.15325	8.86546e-16	7.32305e-14	223.004	host cell factor C1 regulator 1 [Source:HGNC Symbol;Acc:HGNC:21198]
ENSG00000103196.11	CRISPLD2	protein_coding	164.789	1.66515	1.49736e-07	2.52921e-06	1.77489	cysteine rich secretory protein LCCL domain containing 2 [Source:HGNC Symbol;Acc:HGNC:25248]
ENSG00000103226.17	NOMO3	protein_coding	432.3	-0.695156	0.00423027	0.0184903	3.50484	NODAL modulator 3 [Source:HGNC Symbol;Acc:HGNC:25242]
ENSG00000103356.15	EARS2	protein_coding	4451	-0.741259	2.26968e-08	4.69341e-07	51.3261	glutamyl-tRNA synthetase 2, mitochondrial [Source:HGNC Symbol;Acc:HGNC:29419]
ENSG00000103507.13	BCKDK	protein_coding	2558.69	0.668097	2.75275e-06	3.4151e-05	39.6771	branched chain ketoacid dehydrogenase kinase [Source:HGNC Symbol;Acc:HGNC:16902]
ENSG00000103876.11	FAH	protein_coding	1215.92	-0.747886	0.00208391	0.010346	11.5432	fumarylacetoacetate hydrolase [Source:HGNC Symbol;Acc:HGNC:3579]
ENSG00000103995.13	CEP152	protein_coding	1435.92	-0.833072	2.17152e-05	0.000206683	13.56	centrosomal protein 152 [Source:HGNC Symbol;Acc:HGNC:29298]
ENSG00000104081.13	BMF	protein_coding	296.123	0.743937	0.00851511	0.0323159	4.42079	Bcl2 modifying factor [Source:HGNC Symbol;Acc:HGNC:24132]
ENSG00000104131.12	EIF3J	protein_coding	2767.57	-0.928785	9.54378e-10	2.6872e-08	64.272	eukaryotic translation initiation factor 3 subunit J [Source:HGNC Symbol;Acc:HGNC:3270]
ENSG00000104140.6	RHOV	protein_coding	743.66	-1.3481	2.65989e-07	4.22606e-06	33.3394	ras homolog family member V [Source:HGNC Symbol;Acc:HGNC:18313]
ENSG00000104147.8	OIP5	protein_coding	534.615	-0.642229	0.0136737	0.0472626	34.1289	Opa interacting protein 5 [Source:HGNC Symbol;Acc:HGNC:20300]
ENSG00000104205.12	SGK3	protein_coding	139.048	-0.923083	0.00252829	0.0121068	1.85489	serum/glucocorticoid regulated kinase family member 3 [Source:HGNC Symbol;Acc:HGNC:10812]
ENSG00000104213.12	PDGFRL	protein_coding	1044.65	-0.82204	2.23094e-06	2.81739e-05	29.8489	platelet derived growth factor receptor like [Source:HGNC Symbol;Acc:HGNC:8805]
ENSG00000104267.9	CA2	protein_coding	266.234	-0.850105	0.00609734	0.0248093	9.32966	carbonic anhydrase 2 [Source:HGNC Symbol;Acc:HGNC:1373]
ENSG00000104419.14	NDRG1	protein_coding	26223.5	3.79655	1.75945e-63	2.1912e-60	296.206	N-myc downstream regulated 1 [Source:HGNC Symbol;Acc:HGNC:7679]
ENSG00000104442.9	ARMC1	protein_coding	4578.58	-0.708419	2.15795e-05	0.000205513	100.08	armadillo repeat containing 1 [Source:HGNC Symbol;Acc:HGNC:17684]
ENSG00000104490.17	NCALD	protein_coding	1743.16	-1.14447	2.09137e-06	2.6724e-05	16.6244	neurocalcin delta [Source:HGNC Symbol;Acc:HGNC:7655]
ENSG00000104687.12	GSR	protein_coding	21485.6	-0.60976	7.12581e-07	1.02004e-05	427.397	glutathione-disulfide reductase [Source:HGNC Symbol;Acc:HGNC:4623]
ENSG00000104691.14	UBXN8	protein_coding	1362.99	-0.827923	5.80942e-07	8.54264e-06	30.0858	UBX domain protein 8 [Source:HGNC Symbol;Acc:HGNC:30307]
ENSG00000104731.13	KLHDC4	protein_coding	1764.58	-0.729528	1.21155e-06	1.61974e-05	11.9833	kelch domain containing 4 [Source:HGNC Symbol;Acc:HGNC:25272]
ENSG00000104738.16	MCM4	protein_coding	12394.8	-0.980098	7.38466e-12	3.24004e-10	134.928	minichromosome maintenance complex component 4 [Source:HGNC Symbol;Acc:HGNC:6947]
ENSG00000104765.14	BNIP3L	protein_coding	21443.2	1.95683	4.07036e-57	3.87642e-54	405.664	BCL2 interacting protein 3 like [Source:HGNC Symbol;Acc:HGNC:1085]
ENSG00000104812.14	GYS1	protein_coding	5174.35	1.37264	3.93106e-17	4.02809e-15	90.8953	glycogen synthase 1 [Source:HGNC Symbol;Acc:HGNC:4706]
ENSG00000104880.17	ARHGEF18	protein_coding	536.789	0.881359	7.22451e-06	7.9778e-05	5.63062	Rho/Rac guanine nucleotide exchange factor 18 [Source:HGNC Symbol;Acc:HGNC:17090]
ENSG00000104881.14	PPP1R13L	protein_coding	653.666	1.32833	1.23471e-12	6.0945e-11	9.10254	protein phosphatase 1 regulatory subunit 13 like [Source:HGNC Symbol;Acc:HGNC:18838]
ENSG00000104889.4	RNASEH2A	protein_coding	1872.11	-0.79943	2.26307e-07	3.65659e-06	64.2963	ribonuclease H2 subunit A [Source:HGNC Symbol;Acc:HGNC:18518]
ENSG00000104980.7	TIMM44	protein_coding	1295.81	-0.627611	0.000493569	0.00307105	17.5447	translocase of inner mitochondrial membrane 44 [Source:HGNC Symbol;Acc:HGNC:17316]
ENSG00000105011.8	ASF1B	protein_coding	1381.15	-0.67089	5.10437e-05	0.000436324	39.5682	anti-silencing function 1B histone chaperone [Source:HGNC Symbol;Acc:HGNC:20996]
ENSG00000105048.16	TNNT1	protein_coding	5456.85	1.226	3.32097e-18	3.81322e-16	172.074	troponin T1, slow skeletal type [Source:HGNC Symbol;Acc:HGNC:11948]
ENSG00000105072.8	C19orf44	protein_coding	440.365	-0.626561	0.00245593	0.0118338	6.40544	chromosome 19 open reading frame 44 [Source:HGNC Symbol;Acc:HGNC:26141]
ENSG00000105137.12	SYDE1	protein_coding	1719.96	0.979933	8.07677e-08	1.45131e-06	30.2333	synapse defective Rho GTPase homolog 1 [Source:HGNC Symbol;Acc:HGNC:25824]
ENSG00000105204.13	DYRK1B	protein_coding	2384.52	0.639485	1.41086e-05	0.000142583	43.9199	dual specificity tyrosine phosphorylation regulated kinase 1B [Source:HGNC Symbol;Acc:HGNC:3092]
ENSG00000105220.14	GPI	protein_coding	98552.2	1.53498	9.71607e-20	1.33308e-17	935.621	glucose-6-phosphate isomerase [Source:HGNC Symbol;Acc:HGNC:4458]
ENSG00000105321.12	CCDC9	protein_coding	703.851	-0.625523	0.000514795	0.00318233	13.057	coiled-coil domain containing 9 [Source:HGNC Symbol;Acc:HGNC:24560]
ENSG00000105329.9	TGFB1	protein_coding	2960.44	0.62183	9.969e-06	0.000105009	54.2836	transforming growth factor beta 1 [Source:HGNC Symbol;Acc:HGNC:11766]
ENSG00000105339.10	DENND3	protein_coding	1769.62	0.647294	7.02049e-05	0.000576378	7.74469	DENN domain containing 3 [Source:HGNC Symbol;Acc:HGNC:29134]
ENSG00000105357.15	MYH14	protein_coding	591.311	-0.993865	2.35026e-06	2.96115e-05	4.78738	myosin heavy chain 14 [Source:HGNC Symbol;Acc:HGNC:23212]
ENSG00000105419.17	MEIS3	protein_coding	2754.6	0.609335	5.141e-05	0.00043876	34.6111	Meis homeobox 3 [Source:HGNC Symbol;Acc:HGNC:29537]
ENSG00000105447.12	GRWD1	protein_coding	4876.41	-0.615417	0.00086127	0.00492873	55.5385	glutamate rich WD repeat containing 1 [Source:HGNC Symbol;Acc:HGNC:21270]
ENSG00000105486.13	LIG1	protein_coding	4378.25	-0.867637	1.79215e-10	5.87346e-09	46.6329	DNA ligase 1 [Source:HGNC Symbol;Acc:HGNC:6598]
ENSG00000105519.13	CAPS	protein_coding	480.83	0.684982	0.00564008	0.0232941	8.00534	calcyphosine [Source:HGNC Symbol;Acc:HGNC:1487]
ENSG00000105617.3	LENG1	protein_coding	529.068	-0.725618	0.000214603	0.00150473	23.2597	leukocyte receptor cluster member 1 [Source:HGNC Symbol;Acc:HGNC:15502]
ENSG00000105619.13	TFPT	protein_coding	694.277	-0.590842	0.00214605	0.0105961	36.7925	TCF3 fusion partner [Source:HGNC Symbol;Acc:HGNC:13630]
ENSG00000105643.9	ARRDC2	protein_coding	1940.81	-0.625164	2.88786e-05	0.000266711	26.529	arrestin domain containing 2 [Source:HGNC Symbol;Acc:HGNC:25225]
ENSG00000105668.7	UPK1A	protein_coding	247.63	3.37118	4.59801e-23	8.36424e-21	17.2655	uroplakin 1A [Source:HGNC Symbol;Acc:HGNC:12577]
ENSG00000105671.11	DDX49	protein_coding	1645.69	-0.6059	0.0010259	0.00573525	39.0008	DEAD-box helicase 49 [Source:HGNC Symbol;Acc:HGNC:18684]
ENSG00000105821.14	DNAJC2	protein_coding	2844.56	-0.847392	1.83762e-09	4.78312e-08	30.2892	DnaJ heat shock protein family (Hsp40) member C2 [Source:HGNC Symbol;Acc:HGNC:13192]
ENSG00000105849.5	TWISTNB	protein_coding	2994.52	-0.678758	4.5318e-05	0.000393826	53.7598	TWIST neighbor [Source:HGNC Symbol;Acc:HGNC:18027]
ENSG00000105855.9	ITGB8	protein_coding	1274.28	0.992851	0.000141561	0.00105617	6.98244	integrin subunit beta 8 [Source:HGNC Symbol;Acc:HGNC:6163]
ENSG00000105856.13	HBP1	protein_coding	5760.67	0.586706	2.76853e-05	0.000257293	58.4016	HMG-box transcription factor 1 [Source:HGNC Symbol;Acc:HGNC:23200]
ENSG00000105877.17	DNAH11	protein_coding	352.95	2.82998	2.2654e-22	3.94374e-20	2.49322	dynein axonemal heavy chain 11 [Source:HGNC Symbol;Acc:HGNC:2942]
ENSG00000105929.15	ATP6V0A4	protein_coding	173.295	1.94552	5.28214e-07	7.81699e-06	5.19875	ATPase H+ transporting V0 subunit a4 [Source:HGNC Symbol;Acc:HGNC:866]
ENSG00000105971.14	CAV2	protein_coding	8428.65	0.803735	2.96282e-07	4.64807e-06	81.8298	caveolin 2 [Source:HGNC Symbol;Acc:HGNC:1528]
ENSG00000105974.11	CAV1	protein_coding	18289.6	1.0797	2.08606e-14	1.41905e-12	326.94	caveolin 1 [Source:HGNC Symbol;Acc:HGNC:1527]
ENSG00000106025.8	TSPAN12	protein_coding	117.301	-0.887366	0.00573833	0.0236064	2.62256	tetraspanin 12 [Source:HGNC Symbol;Acc:HGNC:21641]
ENSG00000106070.17	GRB10	protein_coding	8520.54	1.28249	2.24029e-20	3.23841e-18	65.5392	growth factor receptor bound protein 10 [Source:HGNC Symbol;Acc:HGNC:4564]
ENSG00000106105.13	GARS	protein_coding	10602.8	-0.606369	4.68747e-06	5.4953e-05	165.367	glycyl-tRNA synthetase [Source:HGNC Symbol;Acc:HGNC:4162]
ENSG00000106258.13	CYP3A5	protein_coding	2047.78	0.802916	0.000250848	0.00172378	19.7134	cytochrome P450 family 3 subfamily A member 5 [Source:HGNC Symbol;Acc:HGNC:2638]
ENSG00000106268.15	NUDT1	protein_coding	1181.92	-1.04472	3.17409e-10	9.92058e-09	44.5923	nudix hydrolase 1 [Source:HGNC Symbol;Acc:HGNC:8048]
ENSG00000106327.12	TFR2	protein_coding	270.376	0.700516	0.00532848	0.0223161	3.40958	transferrin receptor 2 [Source:HGNC Symbol;Acc:HGNC:11762]
ENSG00000106351.12	AGFG2	protein_coding	7897.63	1.17323	0.00304383	0.0141	140.478	ArfGAP with FG repeats 2 [Source:HGNC Symbol;Acc:HGNC:5177]
ENSG00000106355.9	LSM5	protein_coding	2886.26	-0.819463	3.22201e-06	3.93693e-05	47.5879	LSM5 homolog, U6 small nuclear RNA and mRNA degradation associated [Source:HGNC Symbol;Acc:HGNC:17162]
ENSG00000106399.11	RPA3	protein_coding	2312.27	-0.865599	7.05333e-07	1.01235e-05	55.5693	replication protein A3 [Source:HGNC Symbol;Acc:HGNC:10291]
ENSG00000106443.15	PHF14	protein_coding	5360.6	-0.604146	1.23552e-05	0.000127165	38.7669	PHD finger protein 14 [Source:HGNC Symbol;Acc:HGNC:22203]
ENSG00000106462.10	EZH2	protein_coding	1829.81	-0.74269	9.39452e-06	9.98669e-05	27.5237	enhancer of zeste 2 polycomb repressive complex 2 subunit [Source:HGNC Symbol;Acc:HGNC:3527]
ENSG00000106477.18	CEP41	protein_coding	1700.38	-0.687741	3.47093e-05	0.000313061	9.63203	centrosomal protein 41 [Source:HGNC Symbol;Acc:HGNC:12370]
ENSG00000106537.7	TSPAN13	protein_coding	2366.05	-1.52617	3.49743e-15	2.62778e-13	88.0487	tetraspanin 13 [Source:HGNC Symbol;Acc:HGNC:21643]
ENSG00000106546.12	AHR	protein_coding	11095.9	-0.613526	0.000639634	0.00383686	109.463	aryl hydrocarbon receptor [Source:HGNC Symbol;Acc:HGNC:348]
ENSG00000106628.10	POLD2	protein_coding	5128.4	-0.848998	2.59398e-10	8.28334e-09	95.3563	DNA polymerase delta 2, accessory subunit [Source:HGNC Symbol;Acc:HGNC:9176]
ENSG00000106665.15	CLIP2	protein_coding	8391.78	1.06489	0.00472012	0.020281	103.526	CAP-Gly domain containing linker protein 2 [Source:HGNC Symbol;Acc:HGNC:2586]
ENSG00000106688.11	SLC1A1	protein_coding	713.629	0.71881	0.000345353	0.00226845	11.7985	solute carrier family 1 member 1 [Source:HGNC Symbol;Acc:HGNC:10939]
ENSG00000106785.14	TRIM14	protein_coding	1369.23	-0.687457	0.00373066	0.0166573	17.3005	tripartite motif containing 14 [Source:HGNC Symbol;Acc:HGNC:16283]
ENSG00000106799.12	TGFBR1	protein_coding	8688.41	0.690409	1.2931e-05	0.000132258	81.082	transforming growth factor beta receptor 1 [Source:HGNC Symbol;Acc:HGNC:11772]
ENSG00000106853.16	PTGR1	protein_coding	20481.6	0.734837	3.09345e-07	4.83426e-06	348.056	prostaglandin reductase 1 [Source:HGNC Symbol;Acc:HGNC:18429]
ENSG00000107020.9	PLGRKT	protein_coding	793.864	-0.937379	1.52976e-06	2.01029e-05	38.688	plasminogen receptor with a C-terminal lysine [Source:HGNC Symbol;Acc:HGNC:23633]
ENSG00000107104.18	KANK1	protein_coding	5649.08	0.850043	0.000124424	0.000949752	37.8756	KN motif and ankyrin repeat domains 1 [Source:HGNC Symbol;Acc:HGNC:19309]
ENSG00000107159.12	CA9	protein_coding	6655.63	2.01531	3.79356e-08	7.40865e-07	420.386	carbonic anhydrase 9 [Source:HGNC Symbol;Acc:HGNC:1383]
ENSG00000107201.9	DDX58	protein_coding	2025.77	0.962469	0.0146022	0.049802	42.8571	DExD/H-box helicase 58 [Source:HGNC Symbol;Acc:HGNC:19102]
ENSG00000107338.9	SHB	protein_coding	1584.5	1.32885	3.49509e-09	8.58658e-08	46.8601	SH2 domain containing adaptor protein B [Source:HGNC Symbol;Acc:HGNC:10838]
ENSG00000107518.16	ATRNL1	protein_coding	652.222	0.904287	4.77618e-05	0.000411748	4.48193	attractin like 1 [Source:HGNC Symbol;Acc:HGNC:29063]
ENSG00000107651.12	SEC23IP	protein_coding	8137.01	-0.678927	9.5613e-08	1.70596e-06	67.1482	SEC23 interacting protein [Source:HGNC Symbol;Acc:HGNC:17018]
ENSG00000107672.14	NSMCE4A	protein_coding	4546.82	-0.660567	1.01401e-05	0.000106672	85.1894	NSE4 homolog A, SMC5-SMC6 complex component [Source:HGNC Symbol;Acc:HGNC:25935]
ENSG00000107679.14	PLEKHA1	protein_coding	5936.78	0.677503	2.93812e-06	3.62839e-05	16.2693	pleckstrin homology domain containing A1 [Source:HGNC Symbol;Acc:HGNC:14335]
ENSG00000107796.12	ACTA2	protein_coding	1005.65	-0.799169	0.000236217	0.00163644	22.9643	actin, alpha 2, smooth muscle, aorta [Source:HGNC Symbol;Acc:HGNC:130]
ENSG00000107815.7	C10orf2	protein_coding	1647.7	-0.901344	1.64674e-09	4.37016e-08	32.5954	twinkle mtDNA helicase [Source:HGNC Symbol;Acc:HGNC:1160]
ENSG00000107819.13	SFXN3	protein_coding	3554.17	1.15686	4.45067e-13	2.3939e-11	56.9734	sideroflexin 3 [Source:HGNC Symbol;Acc:HGNC:16087]
ENSG00000107833.10	NPM3	protein_coding	1237.84	-1.21186	8.46917e-12	3.6467e-10	109.314	nucleophosmin/nucleoplasmin 3 [Source:HGNC Symbol;Acc:HGNC:7931]
ENSG00000107937.18	GTPBP4	protein_coding	7969.15	-0.706316	1.69444e-06	2.20878e-05	84.8164	GTP binding protein 4 [Source:HGNC Symbol;Acc:HGNC:21535]
ENSG00000107949.16	BCCIP	protein_coding	3798.43	-0.900002	1.21695e-09	3.33374e-08	62.6961	BRCA2 and CDKN1A interacting protein [Source:HGNC Symbol;Acc:HGNC:978]
ENSG00000107957.16	SH3PXD2A	protein_coding	1806.55	-1.19619	5.39322e-12	2.42545e-10	11.3567	SH3 and PX domains 2A [Source:HGNC Symbol;Acc:HGNC:23664]
ENSG00000107968.9	MAP3K8	protein_coding	3288.21	0.792297	3.69534e-08	7.22555e-07	56.8596	mitogen-activated protein kinase kinase kinase 8 [Source:HGNC Symbol;Acc:HGNC:6860]
ENSG00000107984.9	DKK1	protein_coding	22525.6	-1.99031	1.12027e-20	1.69506e-18	905.702	dickkopf WNT signaling pathway inhibitor 1 [Source:HGNC Symbol;Acc:HGNC:2891]
ENSG00000108055.9	SMC3	protein_coding	7326.94	-0.627367	4.98562e-06	5.78617e-05	114.865	structural maintenance of chromosomes 3 [Source:HGNC Symbol;Acc:HGNC:2468]
ENSG00000108064.10	TFAM	protein_coding	5416.15	-0.746745	1.2744e-05	0.000130751	73.4992	transcription factor A, mitochondrial [Source:HGNC Symbol;Acc:HGNC:11741]
ENSG00000108100.17	CCNY	protein_coding	6396.53	0.952106	1.15208e-07	2.00562e-06	90.7035	cyclin Y [Source:HGNC Symbol;Acc:HGNC:23354]
ENSG00000108176.14	DNAJC12	protein_coding	3109.89	-0.867979	1.28602e-05	0.000131776	100.426	DnaJ heat shock protein family (Hsp40) member C12 [Source:HGNC Symbol;Acc:HGNC:28908]
ENSG00000108312.14	UBTF	protein_coding	7071.92	-0.685385	2.21184e-06	2.79763e-05	66.2089	upstream binding transcription factor, RNA polymerase I [Source:HGNC Symbol;Acc:HGNC:12511]
ENSG00000108352.11	RAPGEFL1	protein_coding	217.532	0.7077	0.00705929	0.0278145	2.37978	Rap guanine nucleotide exchange factor like 1 [Source:HGNC Symbol;Acc:HGNC:17428]
ENSG00000108370.15	RGS9	protein_coding	71.4033	1.46704	6.39614e-05	0.000530772	1.62051	regulator of G protein signaling 9 [Source:HGNC Symbol;Acc:HGNC:10004]
ENSG00000108384.14	RAD51C	protein_coding	2228.38	-1.00642	1.29717e-09	3.5237e-08	28.3452	RAD51 paralog C [Source:HGNC Symbol;Acc:HGNC:9820]
ENSG00000108439.9	PNPO	protein_coding	3415.45	-0.766222	2.60234e-06	3.25091e-05	81.7108	pyridoxamine 5'-phosphate oxidase [Source:HGNC Symbol;Acc:HGNC:30260]
ENSG00000108561.8	C1QBP	protein_coding	16178	-0.632437	5.49959e-06	6.33274e-05	443.021	complement C1q binding protein [Source:HGNC Symbol;Acc:HGNC:1243]
ENSG00000108669.16	CYTH1	protein_coding	4417.8	0.851107	5.80047e-10	1.71681e-08	35.5052	cytohesin 1 [Source:HGNC Symbol;Acc:HGNC:9501]
ENSG00000108813.10	DLX4	protein_coding	241.056	0.772574	0.00232015	0.0112904	4.19064	distal-less homeobox 4 [Source:HGNC Symbol;Acc:HGNC:2917]
ENSG00000108828.15	VAT1	protein_coding	16296.4	0.788236	7.25117e-07	1.03524e-05	304.12	vesicle amine transport 1 [Source:HGNC Symbol;Acc:HGNC:16919]
ENSG00000108829.9	LRRC59	protein_coding	16612.8	-0.693949	1.19741e-07	2.07782e-06	233.016	leucine rich repeat containing 59 [Source:HGNC Symbol;Acc:HGNC:28817]
ENSG00000108840.15	HDAC5	protein_coding	1729.64	0.806809	1.07427e-06	1.46032e-05	14.2088	histone deacetylase 5 [Source:HGNC Symbol;Acc:HGNC:14068]
ENSG00000108852.14	MPP2	protein_coding	730.225	-0.657366	0.0040707	0.0179235	8.80204	membrane palmitoylated protein 2 [Source:HGNC Symbol;Acc:HGNC:7220]
ENSG00000108861.8	DUSP3	protein_coding	13221.9	0.883575	7.70985e-08	1.39311e-06	178.128	dual specificity phosphatase 3 [Source:HGNC Symbol;Acc:HGNC:3069]
ENSG00000108947.4	EFNB3	protein_coding	463.346	1.21077	1.12233e-06	1.51422e-05	10.0624	ephrin B3 [Source:HGNC Symbol;Acc:HGNC:3228]
ENSG00000108984.13	MAP2K6	protein_coding	2817.61	-0.752081	5.39988e-06	6.23122e-05	30.782	mitogen-activated protein kinase kinase 6 [Source:HGNC Symbol;Acc:HGNC:6846]
ENSG00000109046.14	WSB1	protein_coding	7438.44	1.13259	1.31908e-14	9.24496e-13	63.4758	WD repeat and SOCS box containing 1 [Source:HGNC Symbol;Acc:HGNC:19221]
ENSG00000109062.9	SLC9A3R1	protein_coding	2403.3	-0.800972	5.48715e-05	0.000463659	73.9228	SLC9A3 regulator 1 [Source:HGNC Symbol;Acc:HGNC:11075]
ENSG00000109084.13	TMEM97	protein_coding	12283.7	-0.604927	4.10718e-06	4.8786e-05	259.68	transmembrane protein 97 [Source:HGNC Symbol;Acc:HGNC:28106]
ENSG00000109107.13	ALDOC	protein_coding	2699.57	2.38698	2.4282e-09	6.08553e-08	94.6769	aldolase, fructose-bisphosphate C [Source:HGNC Symbol;Acc:HGNC:418]
ENSG00000109265.12	KIAA1211	protein_coding	505.037	-0.588375	0.00530356	0.0222505	5.42032	KIAA1211 [Source:HGNC Symbol;Acc:HGNC:29219]
ENSG00000109321.10	AREG	protein_coding	1553.77	-1.54559	3.80475e-17	3.9235e-15	84.8133	amphiregulin [Source:HGNC Symbol;Acc:HGNC:651]
ENSG00000109472.13	CPE	protein_coding	1193.29	1.00673	1.7133e-07	2.85374e-06	26.9139	carboxypeptidase E [Source:HGNC Symbol;Acc:HGNC:2303]
ENSG00000109534.16	GAR1	protein_coding	338.962	-1.48071	7.80485e-09	1.77973e-07	14.7828	GAR1 ribonucleoprotein [Source:HGNC Symbol;Acc:HGNC:14264]
ENSG00000109586.11	GALNT7	protein_coding	5424.84	-0.655629	0.000938857	0.00530138	51.1544	polypeptide N-acetylgalactosaminyltransferase 7 [Source:HGNC Symbol;Acc:HGNC:4129]
ENSG00000109654.14	TRIM2	protein_coding	877.402	0.621878	0.00069727	0.0041215	6.14479	tripartite motif containing 2 [Source:HGNC Symbol;Acc:HGNC:15974]
ENSG00000109674.3	NEIL3	protein_coding	1772.04	-1.06403	9.76724e-09	2.16619e-07	49.6425	nei like DNA glycosylase 3 [Source:HGNC Symbol;Acc:HGNC:24573]
ENSG00000109736.14	MFSD10	protein_coding	2610.15	0.618535	1.66817e-05	0.000165387	50.1367	major facilitator superfamily domain containing 10 [Source:HGNC Symbol;Acc:HGNC:16894]
ENSG00000109762.15	SNX25	protein_coding	2346.86	0.820512	0.000101064	0.000789305	37.1708	sorting nexin 25 [Source:HGNC Symbol;Acc:HGNC:21883]
ENSG00000109805.9	NCAPG	protein_coding	3865.88	-0.797864	1.33905e-06	1.7792e-05	58.9603	non-SMC condensin I complex subunit G [Source:HGNC Symbol;Acc:HGNC:24304]
ENSG00000109861.15	CTSC	protein_coding	4666.53	-0.845394	1.76944e-07	2.93217e-06	27.6496	cathepsin C [Source:HGNC Symbol;Acc:HGNC:2528]
ENSG00000109881.16	CCDC34	protein_coding	2068.34	-1.46469	2.58333e-20	3.70125e-18	45.3151	coiled-coil domain containing 34 [Source:HGNC Symbol;Acc:HGNC:25079]
ENSG00000110090.12	CPT1A	protein_coding	4695.18	-0.881065	3.44775e-06	4.18121e-05	52.6204	carnitine palmitoyltransferase 1A [Source:HGNC Symbol;Acc:HGNC:2328]
ENSG00000110104.11	CCDC86	protein_coding	1904.38	-0.784346	0.000136162	0.00101993	62.2271	coiled-coil domain containing 86 [Source:HGNC Symbol;Acc:HGNC:28359]
ENSG00000110107.8	PRPF19	protein_coding	5682.57	-0.644603	6.04673e-07	8.85942e-06	134.759	pre-mRNA processing factor 19 [Source:HGNC Symbol;Acc:HGNC:17896]
ENSG00000110172.11	CHORDC1	protein_coding	6707.22	-0.871877	1.00334e-09	2.80071e-08	46.3526	cysteine and histidine rich domain containing 1 [Source:HGNC Symbol;Acc:HGNC:14525]
ENSG00000110328.5	GALNT18	protein_coding	1349.6	1.05607	3.25673e-11	1.25839e-09	24.5296	polypeptide N-acetylgalactosaminyltransferase 18 [Source:HGNC Symbol;Acc:HGNC:30488]
ENSG00000110400.10	PVRL1	protein_coding	779.671	-0.95242	9.52948e-07	1.31416e-05	6.99302	nectin cell adhesion molecule 1 [Source:HGNC Symbol;Acc:HGNC:9706]
ENSG00000110958.15	PTGES3	protein_coding	15446.2	-0.93002	3.4175e-08	6.73106e-07	364.025	prostaglandin E synthase 3 [Source:HGNC Symbol;Acc:HGNC:16049]
ENSG00000111052.7	LIN7A	protein_coding	643.561	-0.751407	0.000223519	0.00155981	6.97217	lin-7 homolog A, crumbs cell polarity complex component [Source:HGNC Symbol;Acc:HGNC:17787]
ENSG00000111181.12	SLC6A12	protein_coding	2268.07	0.694129	0.00057789	0.00350676	74.2613	solute carrier family 6 member 12 [Source:HGNC Symbol;Acc:HGNC:11045]
ENSG00000111196.9	MAGOHB	protein_coding	1463.37	-0.804342	4.78736e-06	5.58411e-05	22.0699	mago homolog B, exon junction complex core component [Source:HGNC Symbol;Acc:HGNC:25504]
ENSG00000111199.10	TRPV4	protein_coding	62.9867	1.03175	0.00653639	0.0262201	1.16586	transient receptor potential cation channel subfamily V member 4 [Source:HGNC Symbol;Acc:HGNC:18083]
ENSG00000111206.12	FOXM1	protein_coding	4216.7	-1.13403	1.36401e-17	1.48211e-15	63.9386	forkhead box M1 [Source:HGNC Symbol;Acc:HGNC:3818]
ENSG00000111231.8	GPN3	protein_coding	1354.85	-0.810249	8.47233e-06	9.13838e-05	39.7413	GPN-loop GTPase 3 [Source:HGNC Symbol;Acc:HGNC:30186]
ENSG00000111247.14	RAD51AP1	protein_coding	1586.38	-1.05207	5.34908e-08	9.97714e-07	51.816	RAD51 associated protein 1 [Source:HGNC Symbol;Acc:HGNC:16956]
ENSG00000111328.6	CDK2AP1	protein_coding	3967.84	0.601707	0.00809088	0.0310627	91.1228	cyclin dependent kinase 2 associated protein 1 [Source:HGNC Symbol;Acc:HGNC:14002]
ENSG00000111331.12	OAS3	protein_coding	4486.4	-0.859887	8.39584e-11	2.95497e-09	37.1111	2'-5'-oligoadenylate synthetase 3 [Source:HGNC Symbol;Acc:HGNC:8088]
ENSG00000111364.15	DDX55	protein_coding	3483.27	-0.601732	4.058e-05	0.000359404	40.388	DEAD-box helicase 55 [Source:HGNC Symbol;Acc:HGNC:20085]
ENSG00000111445.13	RFC5	protein_coding	2836.67	-0.972159	4.9352e-09	1.17319e-07	67.0428	replication factor C subunit 5 [Source:HGNC Symbol;Acc:HGNC:9973]
ENSG00000111490.12	TBC1D30	protein_coding	202.669	-1.61017	2.34878e-08	4.83801e-07	1.89417	TBC1 domain family member 30 [Source:HGNC Symbol;Acc:HGNC:29164]
ENSG00000111581.9	NUP107	protein_coding	6867.29	-0.813459	1.12169e-07	1.97608e-06	61.6584	nucleoporin 107 [Source:HGNC Symbol;Acc:HGNC:29914]
ENSG00000111602.11	TIMELESS	protein_coding	6425.49	-1.14218	1.40183e-15	1.10711e-13	85.874	timeless circadian regulator [Source:HGNC Symbol;Acc:HGNC:11813]
ENSG00000111615.12	KRR1	protein_coding	6270.69	-0.585081	7.97177e-05	0.000640511	40.1204	KRR1, small subunit processome component homolog [Source:HGNC Symbol;Acc:HGNC:5176]
ENSG00000111640.14	GAPDH	protein_coding	419954	1.05836	2.31238e-16	2.13928e-14	9877.83	glyceraldehyde-3-phosphate dehydrogenase [Source:HGNC Symbol;Acc:HGNC:4141]
ENSG00000111641.10	NOP2	protein_coding	6326.88	-0.628103	0.0016878	0.00869682	86.7569	NOP2 nucleolar protein [Source:HGNC Symbol;Acc:HGNC:7867]
ENSG00000111653.19	ING4	protein_coding	1923.59	0.632725	7.15346e-05	0.000584332	45.6766	inhibitor of growth family member 4 [Source:HGNC Symbol;Acc:HGNC:19423]
ENSG00000111665.11	CDCA3	protein_coding	1941.92	-0.641059	2.18676e-05	0.000208012	23.0965	cell division cycle associated 3 [Source:HGNC Symbol;Acc:HGNC:14624]
ENSG00000111669.14	TPI1	protein_coding	74891.5	1.25185	6.63295e-21	1.01309e-18	1910.93	triosephosphate isomerase 1 [Source:HGNC Symbol;Acc:HGNC:12009]
ENSG00000111674.8	ENO2	protein_coding	7035.11	2.13919	2.49975e-51	1.92719e-48	145.806	enolase 2 [Source:HGNC Symbol;Acc:HGNC:3353]
ENSG00000111711.9	GOLT1B	protein_coding	5439.77	-0.649132	0.00104232	0.00580299	113.168	golgi transport 1B [Source:HGNC Symbol;Acc:HGNC:20175]
ENSG00000111788.10	RP11-22B23.1	unprocessed_pseudogene	275.833	-0.845666	0.000939119	0.00530138	6.86526
ENSG00000111799.20	COL12A1	protein_coding	6078.61	2.34129	4.5268e-30	1.43704e-27	44.7782	collagen type XII alpha 1 chain [Source:HGNC Symbol;Acc:HGNC:2188]
ENSG00000111845.4	PAK1IP1	protein_coding	1262.42	-0.745971	0.000108218	0.000837503	49.6064	PAK1 interacting protein 1 [Source:HGNC Symbol;Acc:HGNC:20882]
ENSG00000111875.7	ASF1A	protein_coding	1326.95	-0.789886	1.8367e-05	0.000179892	38.7294	anti-silencing function 1A histone chaperone [Source:HGNC Symbol;Acc:HGNC:20995]
ENSG00000111880.15	RNGTT	protein_coding	2648.63	-0.646557	5.92567e-05	0.000496824	38.2855	RNA guanylyltransferase and 5'-phosphatase [Source:HGNC Symbol;Acc:HGNC:10073]
ENSG00000111897.6	SERINC1	protein_coding	11146.8	0.636737	1.85496e-06	2.39871e-05	219.243	serine incorporator 1 [Source:HGNC Symbol;Acc:HGNC:13464]
ENSG00000111981.4	ULBP1	protein_coding	149.726	-0.895418	0.00283114	0.0132781	3.78234	UL16 binding protein 1 [Source:HGNC Symbol;Acc:HGNC:14893]
ENSG00000112029.9	FBXO5	protein_coding	1784.73	-0.844512	3.28833e-05	0.000298252	35.4739	F-box protein 5 [Source:HGNC Symbol;Acc:HGNC:13584]
ENSG00000112096.16	SOD2	protein_coding	6635.57	0.607621	0.000468643	0.00293969	22.1305	superoxide dismutase 2 [Source:HGNC Symbol;Acc:HGNC:11180]
ENSG00000112110.9	MRPL18	protein_coding	3613.52	-0.732748	3.08098e-07	4.81942e-06	178.817	mitochondrial ribosomal protein L18 [Source:HGNC Symbol;Acc:HGNC:14477]
ENSG00000112118.17	MCM3	protein_coding	8100.01	-0.773306	1.74859e-09	4.58627e-08	151.708	minichromosome maintenance complex component 3 [Source:HGNC Symbol;Acc:HGNC:6945]
ENSG00000112149.9	CD83	protein_coding	82.4284	-0.905014	0.0117185	0.0419	2.85967	CD83 molecule [Source:HGNC Symbol;Acc:HGNC:1703]
ENSG00000112208.11	BAG2	protein_coding	2560.48	-0.660347	9.39605e-05	0.000738098	28.0659	BCL2 associated athanogene 2 [Source:HGNC Symbol;Acc:HGNC:938]
ENSG00000112245.9	PTP4A1	protein_coding	22201.8	-0.722378	9.11039e-07	1.26825e-05	271.807	protein tyrosine phosphatase type IVA, member 1 [Source:HGNC Symbol;Acc:HGNC:9634]
ENSG00000112294.12	ALDH5A1	protein_coding	1249.47	-0.648575	0.000958743	0.00540085	14.7855	aldehyde dehydrogenase 5 family member A1 [Source:HGNC Symbol;Acc:HGNC:408]
ENSG00000112312.9	GMNN	protein_coding	1370.59	-1.00836	6.09035e-09	1.41875e-07	41.122	geminin, DNA replication inhibitor [Source:HGNC Symbol;Acc:HGNC:17493]
ENSG00000112378.11	PERP	protein_coding	28063.6	1.14956	2.02271e-10	6.56266e-09	490.359	PERP, TP53 apoptosis effector [Source:HGNC Symbol;Acc:HGNC:17637]
ENSG00000112379.8	ARFGEF3	protein_coding	3289.37	0.872119	3.71329e-07	5.68616e-06	14.4788	ARFGEF family member 3 [Source:HGNC Symbol;Acc:HGNC:21213]
ENSG00000112406.4	HECA	protein_coding	968.643	1.06975	1.5144e-09	4.05258e-08	12.0201	hdc homolog, cell cycle regulator [Source:HGNC Symbol;Acc:HGNC:21041]
ENSG00000112419.14	PHACTR2	protein_coding	3502.11	-0.821442	1.97362e-09	5.05585e-08	20.8615	phosphatase and actin regulator 2 [Source:HGNC Symbol;Acc:HGNC:20956]
ENSG00000112511.17	PHF1	protein_coding	1022.79	0.62939	0.000311765	0.002078	16.9155	PHD finger protein 1 [Source:HGNC Symbol;Acc:HGNC:8919]
ENSG00000112576.12	CCND3	protein_coding	6178.17	-1.05355	5.47679e-09	1.2888e-07	76.253	cyclin D3 [Source:HGNC Symbol;Acc:HGNC:1585]
ENSG00000112578.9	BYSL	protein_coding	851.316	-0.956683	6.85756e-08	1.25168e-06	26.647	bystin like [Source:HGNC Symbol;Acc:HGNC:1157]
ENSG00000112679.14	DUSP22	protein_coding	973.95	0.737341	1.47482e-05	0.000147756	10.3927	dual specificity phosphatase 22 [Source:HGNC Symbol;Acc:HGNC:16077]
ENSG00000112697.15	TMEM30A	protein_coding	13657.4	-0.631433	0.000136201	0.00101993	181.255	transmembrane protein 30A [Source:HGNC Symbol;Acc:HGNC:16667]
ENSG00000112699.10	GMDS	protein_coding	737.426	-0.640046	0.0055012	0.0228669	12.2094	GDP-mannose 4,6-dehydratase [Source:HGNC Symbol;Acc:HGNC:4369]
ENSG00000112715.20	VEGFA	protein_coding	7527.27	2.159	3.73448e-46	2.74824e-43	42.2005	vascular endothelial growth factor A [Source:HGNC Symbol;Acc:HGNC:12680]
ENSG00000112742.9	TTK	protein_coding	3542.43	-1.15332	4.17891e-12	1.89514e-10	63.4692	TTK protein kinase [Source:HGNC Symbol;Acc:HGNC:12401]
ENSG00000112773.15	FAM46A	protein_coding	3237.18	-1.2124	5.413e-07	7.99603e-06	40.9359	family with sequence similarity 46 member A [Source:HGNC Symbol;Acc:HGNC:18345]
ENSG00000112972.14	HMGCS1	protein_coding	7412.29	-0.716172	0.000459375	0.00289163	104.241	3-hydroxy-3-methylglutaryl-CoA synthase 1 [Source:HGNC Symbol;Acc:HGNC:5007]
ENSG00000113070.7	HBEGF	protein_coding	135.101	0.827692	0.00622536	0.0252098	3.18528	heparin binding EGF like growth factor [Source:HGNC Symbol;Acc:HGNC:3059]
ENSG00000113083.12	LOX	protein_coding	255.837	2.61539	2.32814e-14	1.57053e-12	5.89474	lysyl oxidase [Source:HGNC Symbol;Acc:HGNC:6664]
ENSG00000113161.15	HMGCR	protein_coding	4976.37	-0.82057	3.6791e-06	4.42531e-05	55.7026	3-hydroxy-3-methylglutaryl-CoA reductase [Source:HGNC Symbol;Acc:HGNC:5006]
ENSG00000113231.13	PDE8B	protein_coding	2611.71	0.966712	2.95052e-08	5.912e-07	24.7914	phosphodiesterase 8B [Source:HGNC Symbol;Acc:HGNC:8794]
ENSG00000113300.11	CNOT6	protein_coding	2846.74	-0.634934	0.00181863	0.00925025	27.717	CCR4-NOT transcription complex subunit 6 [Source:HGNC Symbol;Acc:HGNC:14099]
ENSG00000113356.10	POLR3G	protein_coding	643.263	-1.60729	1.27258e-10	4.31027e-09	15.9837	RNA polymerase III subunit G [Source:HGNC Symbol;Acc:HGNC:30075]
ENSG00000113360.16	DROSHA	protein_coding	4993.95	-0.64715	2.18718e-06	2.77077e-05	41.2759	drosha ribonuclease III [Source:HGNC Symbol;Acc:HGNC:17904]
ENSG00000113368.11	LMNB1	protein_coding	5392.9	-0.929924	4.39556e-08	8.392e-07	113.15	lamin B1 [Source:HGNC Symbol;Acc:HGNC:6637]
ENSG00000113369.8	ARRDC3	protein_coding	17781.2	1.74829	1.00093e-19	1.36177e-17	338.335	arrestin domain containing 3 [Source:HGNC Symbol;Acc:HGNC:29263]
ENSG00000113460.12	BRIX1	protein_coding	3098.11	-1.0304	2.56569e-11	1.0206e-09	47.8167	BRX1, biogenesis of ribosomes [Source:HGNC Symbol;Acc:HGNC:24170]
ENSG00000113569.15	NUP155	protein_coding	9772	-0.600622	9.19307e-06	9.81119e-05	70.9084	nucleoporin 155 [Source:HGNC Symbol;Acc:HGNC:8063]
ENSG00000113719.15	ERGIC1	protein_coding	21995.9	0.766912	7.93763e-09	1.80746e-07	94.8701	endoplasmic reticulum-golgi intermediate compartment 1 [Source:HGNC Symbol;Acc:HGNC:29205]
ENSG00000113739.10	STC2	protein_coding	5985.47	3.46879	3.35556e-112	1.81088e-108	89.2036	stanniocalcin 2 [Source:HGNC Symbol;Acc:HGNC:11374]
ENSG00000113810.15	SMC4	protein_coding	13503.1	-0.982165	1.14328e-08	2.50809e-07	122.94	structural maintenance of chromosomes 4 [Source:HGNC Symbol;Acc:HGNC:14013]
ENSG00000113916.17	BCL6	protein_coding	3022.88	0.650459	0.00399118	0.0176405	34.2549	B-cell CLL/lymphoma 6 [Source:HGNC Symbol;Acc:HGNC:1001]
ENSG00000114019.14	AMOTL2	protein_coding	8597.18	1.09863	9.89492e-10	2.77161e-08	95.8848	angiomotin like 2 [Source:HGNC Symbol;Acc:HGNC:17812]
ENSG00000114023.15	FAM162A	protein_coding	3824.68	1.9422	3.12124e-38	1.5313e-35	84.3575	family with sequence similarity 162 member A [Source:HGNC Symbol;Acc:HGNC:17865]
ENSG00000114120.11	SLC25A36	protein_coding	3265.06	0.595884	0.000401181	0.00257437	23.3052	solute carrier family 25 member 36 [Source:HGNC Symbol;Acc:HGNC:25554]
ENSG00000114268.11	PFKFB4	protein_coding	2837	3.34023	3.94291e-94	1.27671e-90	40.8886	6-phosphofructo-2-kinase/fructose-2,6-biphosphatase 4 [Source:HGNC Symbol;Acc:HGNC:8875]
ENSG00000114270.15	COL7A1	protein_coding	20440.2	1.58869	1.00801e-23	1.99021e-21	146.529	collagen type VII alpha 1 chain [Source:HGNC Symbol;Acc:HGNC:2214]
ENSG00000114315.3	HES1	protein_coding	910.484	-0.678996	0.00984649	0.0363278	29.6275	hes family bHLH transcription factor 1 [Source:HGNC Symbol;Acc:HGNC:5192]
ENSG00000114346.13	ECT2	protein_coding	21554.5	-0.60356	0.00138555	0.00739843	276.636	epithelial cell transforming 2 [Source:HGNC Symbol;Acc:HGNC:3155]
ENSG00000114405.10	C3orf14	protein_coding	539.42	-0.781465	0.000928918	0.00525845	9.60677	chromosome 3 open reading frame 14 [Source:HGNC Symbol;Acc:HGNC:25024]
ENSG00000114480.12	GBE1	protein_coding	8182.22	1.20851	1.27781e-21	2.111e-19	111.671	1,4-alpha-glucan branching enzyme 1 [Source:HGNC Symbol;Acc:HGNC:4180]
ENSG00000114554.11	PLXNA1	protein_coding	4594.44	0.612728	7.76087e-06	8.48976e-05	24.4573	plexin A1 [Source:HGNC Symbol;Acc:HGNC:9099]
ENSG00000114646.9	CSPG5	protein_coding	157.529	0.85973	0.00960574	0.035669	3.11926	chondroitin sulfate proteoglycan 5 [Source:HGNC Symbol;Acc:HGNC:2467]
ENSG00000114670.13	NEK11	protein_coding	830.373	0.617072	0.000675965	0.00401463	9.2749	NIMA related kinase 11 [Source:HGNC Symbol;Acc:HGNC:18593]
ENSG00000114686.8	MRPL3	protein_coding	5008.77	-0.769892	1.60839e-08	3.4218e-07	128.26	mitochondrial ribosomal protein L3 [Source:HGNC Symbol;Acc:HGNC:10379]
ENSG00000114767.6	RRP9	protein_coding	1019.46	-1.00762	3.05506e-09	7.55135e-08	46.0688	ribosomal RNA processing 9, U3 small nucleolar RNA binding protein [Source:HGNC Symbol;Acc:HGNC:16829]
ENSG00000114790.12	ARHGEF26	protein_coding	882.194	-0.98683	5.06741e-08	9.52861e-07	12.0445	Rho guanine nucleotide exchange factor 26 [Source:HGNC Symbol;Acc:HGNC:24490]
ENSG00000114796.15	KLHL24	protein_coding	3064.79	0.855085	4.7825e-08	9.04541e-07	23.8831	kelch like family member 24 [Source:HGNC Symbol;Acc:HGNC:25947]
ENSG00000114923.16	SLC4A3	protein_coding	263.447	0.914525	0.000175644	0.00127007	3.37852	solute carrier family 4 member 3 [Source:HGNC Symbol;Acc:HGNC:11029]
ENSG00000115053.15	NCL	protein_coding	22000.2	-1.26259	9.34044e-15	6.75097e-13	234.702	nucleolin [Source:HGNC Symbol;Acc:HGNC:7667]
ENSG00000115073.7	ACTR1B	protein_coding	2728.15	0.938907	1.81871e-09	4.74917e-08	61.5686	ARP1 actin related protein 1 homolog B [Source:HGNC Symbol;Acc:HGNC:168]
ENSG00000115107.19	STEAP3	protein_coding	5512.23	1.64185	4.51741e-16	3.89026e-14	103.579	STEAP3 metalloreductase [Source:HGNC Symbol;Acc:HGNC:24592]
ENSG00000115163.14	CENPA	protein_coding	1529.27	-0.996377	1.9095e-09	4.94151e-08	59.1741	centromere protein A [Source:HGNC Symbol;Acc:HGNC:1851]
ENSG00000115255.10	REEP6	protein_coding	460.438	-0.59537	0.0123511	0.0436508	12.1429	receptor accessory protein 6 [Source:HGNC Symbol;Acc:HGNC:30078]
ENSG00000115295.19	CLIP4	protein_coding	6721.24	0.610513	0.000433247	0.00275069	53.8484	CAP-Gly domain containing linker protein family member 4 [Source:HGNC Symbol;Acc:HGNC:26108]
ENSG00000115365.11	LANCL1	protein_coding	5179.56	-1.05942	2.19916e-08	4.56614e-07	75.9271	LanC like 1 [Source:HGNC Symbol;Acc:HGNC:6508]
ENSG00000115368.9	WDR75	protein_coding	3513.6	-0.65305	1.55454e-05	0.000155262	48.3543	WD repeat domain 75 [Source:HGNC Symbol;Acc:HGNC:25725]
ENSG00000115419.12	GLS	protein_coding	35011.2	1.21439	0.00254301	0.0121629	356.86	glutaminase [Source:HGNC Symbol;Acc:HGNC:4331]
ENSG00000115461.4	IGFBP5	protein_coding	621.19	2.37213	4.75603e-19	6.01563e-17	10.6434	insulin like growth factor binding protein 5 [Source:HGNC Symbol;Acc:HGNC:5474]
ENSG00000115507.9	OTX1	protein_coding	144.947	-0.743557	0.0129732	0.0454162	2.12666	orthodenticle homeobox 1 [Source:HGNC Symbol;Acc:HGNC:8521]
ENSG00000115541.10	HSPE1	protein_coding	1941.34	-0.890047	7.50263e-07	1.06907e-05	76.6021	heat shock protein family E (Hsp10) member 1 [Source:HGNC Symbol;Acc:HGNC:5269]
ENSG00000115548.16	KDM3A	protein_coding	7064.62	1.60425	6.20221e-29	1.7931e-26	43.7607	lysine demethylase 3A [Source:HGNC Symbol;Acc:HGNC:20815]
ENSG00000115616.2	SLC9A2	protein_coding	1606.64	-1.55744	3.49633e-23	6.58205e-21	21.2518	solute carrier family 9 member A2 [Source:HGNC Symbol;Acc:HGNC:11072]
ENSG00000115641.18	FHL2	protein_coding	1599.25	0.725764	2.75641e-06	3.41702e-05	15.5324	four and a half LIM domains 2 [Source:HGNC Symbol;Acc:HGNC:3703]
ENSG00000115687.13	PASK	protein_coding	1122.55	-0.641197	0.000170158	0.00123621	7.25383	PAS domain containing serine/threonine kinase [Source:HGNC Symbol;Acc:HGNC:17270]
ENSG00000115756.12	HPCAL1	protein_coding	2885.9	1.0597	7.31054e-14	4.53478e-12	33.879	hippocalcin like 1 [Source:HGNC Symbol;Acc:HGNC:5145]
ENSG00000115758.12	ODC1	protein_coding	4601.51	-1.46663	3.42007e-24	6.92137e-22	122.864	ornithine decarboxylase 1 [Source:HGNC Symbol;Acc:HGNC:8109]
ENSG00000115761.15	NOL10	protein_coding	3797.47	-0.754661	2.61884e-08	5.31983e-07	67.7998	nucleolar protein 10 [Source:HGNC Symbol;Acc:HGNC:25862]
ENSG00000115816.13	CEBPZ	protein_coding	8702.88	-0.686333	3.25277e-07	5.06369e-06	164.815	CCAAT/enhancer binding protein zeta [Source:HGNC Symbol;Acc:HGNC:24218]
ENSG00000115866.10	DARS	protein_coding	7417.64	0.602717	6.55547e-06	7.36013e-05	111.892	aspartyl-tRNA synthetase [Source:HGNC Symbol;Acc:HGNC:2678]
ENSG00000115902.10	SLC1A4	protein_coding	1536.2	-0.849367	1.71706e-07	2.85706e-06	15.9154	solute carrier family 1 member 4 [Source:HGNC Symbol;Acc:HGNC:10942]
ENSG00000115919.14	KYNU	protein_coding	14286.4	-1.12475	2.434e-15	1.88548e-13	63.6515	kynureninase [Source:HGNC Symbol;Acc:HGNC:6469]
ENSG00000115946.7	PNO1	protein_coding	2452.6	-0.769466	5.71882e-06	6.5433e-05	64.4827	partner of NOB1 homolog [Source:HGNC Symbol;Acc:HGNC:32790]
ENSG00000115963.13	RND3	protein_coding	6205.38	0.700985	8.27114e-05	0.000660957	114.353	Rho family GTPase 3 [Source:HGNC Symbol;Acc:HGNC:671]
ENSG00000115970.18	THADA	protein_coding	5467.96	-0.670026	1.23233e-06	1.64616e-05	26.2352	THADA, armadillo repeat containing [Source:HGNC Symbol;Acc:HGNC:19217]
ENSG00000116016.13	EPAS1	protein_coding	12104.4	0.608525	0.00144961	0.00766717	110.902	endothelial PAS domain protein 1 [Source:HGNC Symbol;Acc:HGNC:3374]
ENSG00000116032.5	GRIN3B	protein_coding	222.712	1.33234	1.37949e-06	1.82766e-05	5.41467	glutamate ionotropic receptor NMDA type subunit 3B [Source:HGNC Symbol;Acc:HGNC:16768]
ENSG00000116117.17	PARD3B	protein_coding	1416.01	0.826614	8.49282e-07	1.18841e-05	9.15053	par-3 family cell polarity regulator beta [Source:HGNC Symbol;Acc:HGNC:14446]
ENSG00000116120.9	FARSB	protein_coding	3147.32	-1.10988	9.65225e-15	6.9146e-13	70.8835	phenylalanyl-tRNA synthetase beta subunit [Source:HGNC Symbol;Acc:HGNC:17800]
ENSG00000116128.9	BCL9	protein_coding	1026.38	-0.597984	0.00720049	0.0282481	10.3145	B-cell CLL/lymphoma 9 [Source:HGNC Symbol;Acc:HGNC:1008]
ENSG00000116133.11	DHCR24	protein_coding	11798.6	-0.591342	0.00694627	0.0274695	190.781	24-dehydrocholesterol reductase [Source:HGNC Symbol;Acc:HGNC:2859]
ENSG00000116161.17	CACYBP	protein_coding	5779.09	-0.660486	2.6404e-05	0.000246671	90.4622	calcyclin binding protein [Source:HGNC Symbol;Acc:HGNC:30423]
ENSG00000116199.11	FAM20B	protein_coding	6767.84	-0.710266	2.98955e-07	4.68546e-06	72.4132	FAM20B, glycosaminoglycan xylosylkinase [Source:HGNC Symbol;Acc:HGNC:23017]
ENSG00000116260.16	QSOX1	protein_coding	7655.35	1.47525	2.05501e-21	3.36066e-19	66.7603	quiescin sulfhydryl oxidase 1 [Source:HGNC Symbol;Acc:HGNC:9756]
ENSG00000116285.12	ERRFI1	protein_coding	15448.9	1.58116	7.76988e-12	3.38157e-10	372.338	ERBB receptor feedback inhibitor 1 [Source:HGNC Symbol;Acc:HGNC:18185]
ENSG00000116473.14	RAP1A	protein_coding	954.355	-0.663003	0.00112375	0.00618825	12.5798	RAP1A, member of RAS oncogene family [Source:HGNC Symbol;Acc:HGNC:9855]
ENSG00000116574.5	RHOU	protein_coding	1244.34	-0.70982	7.02537e-05	0.000576426	18.844	ras homolog family member U [Source:HGNC Symbol;Acc:HGNC:17794]
ENSG00000116649.9	SRM	protein_coding	1142.1	-1.06496	5.44963e-11	2.00067e-09	42.3631	spermidine synthase [Source:HGNC Symbol;Acc:HGNC:11296]
ENSG00000116661.9	FBXO2	protein_coding	1341.95	1.95297	9.65416e-12	4.10238e-10	60.8733	F-box protein 2 [Source:HGNC Symbol;Acc:HGNC:13581]
ENSG00000116717.11	GADD45A	protein_coding	481.19	-0.886558	9.68227e-05	0.000759109	16.4264	growth arrest and DNA damage inducible alpha [Source:HGNC Symbol;Acc:HGNC:4095]
ENSG00000116729.13	WLS	protein_coding	1132.12	-0.712321	0.000181467	0.00130286	16.4226	wntless Wnt ligand secretion mediator [Source:HGNC Symbol;Acc:HGNC:30238]
ENSG00000116750.13	UCHL5	protein_coding	2177.99	-0.885518	1.50722e-06	1.98551e-05	24.5118	ubiquitin C-terminal hydrolase L5 [Source:HGNC Symbol;Acc:HGNC:19678]
ENSG00000116771.5	AGMAT	protein_coding	722.198	-1.07996	2.53314e-07	4.04853e-06	20.8775	agmatinase [Source:HGNC Symbol;Acc:HGNC:18407]
ENSG00000116774.11	OLFML3	protein_coding	987.285	0.949473	2.4821e-08	5.06748e-07	24.293	olfactomedin like 3 [Source:HGNC Symbol;Acc:HGNC:24956]
ENSG00000116830.11	TTF2	protein_coding	2635.92	-0.694133	6.40354e-06	7.22462e-05	18.3137	transcription termination factor 2 [Source:HGNC Symbol;Acc:HGNC:12398]
ENSG00000116833.13	NR5A2	protein_coding	8964.9	1.26615	5.31288e-21	8.27072e-19	82.6089	nuclear receptor subfamily 5 group A member 2 [Source:HGNC Symbol;Acc:HGNC:7984]
ENSG00000116863.10	ADPRHL2	protein_coding	1451	0.991705	4.25837e-08	8.18801e-07	59.9048	ADP-ribosylhydrolase like 2 [Source:HGNC Symbol;Acc:HGNC:21304]
ENSG00000116883.8	RP11-268J15.5	antisense	44.7992	1.52402	0.000226073	0.00157492	2.58948
ENSG00000116918.13	TSNAX	protein_coding	2908.53	-0.597239	0.00177746	0.00908082	33.9411	translin associated factor X [Source:HGNC Symbol;Acc:HGNC:12380]
ENSG00000117010.15	ZNF684	protein_coding	182.08	-0.827693	0.0069023	0.0273624	4.72083	zinc finger protein 684 [Source:HGNC Symbol;Acc:HGNC:28418]
ENSG00000117115.12	PADI2	protein_coding	1337.66	1.70936	2.78506e-12	1.29569e-10	20.4154	peptidyl arginine deiminase 2 [Source:HGNC Symbol;Acc:HGNC:18341]
ENSG00000117139.16	KDM5B	protein_coding	10924.2	0.821371	1.22543e-10	4.1768e-09	57.287	lysine demethylase 5B [Source:HGNC Symbol;Acc:HGNC:18039]
ENSG00000117155.16	SSX2IP	protein_coding	2188.25	-0.804436	1.05268e-06	1.43822e-05	18.9139	SSX family member 2 interacting protein [Source:HGNC Symbol;Acc:HGNC:16509]
ENSG00000117174.10	ZNHIT6	protein_coding	1441.34	-0.958484	2.54689e-09	6.35348e-08	37.7423	zinc finger HIT-type containing 6 [Source:HGNC Symbol;Acc:HGNC:26089]
ENSG00000117305.14	HMGCL	protein_coding	1670.94	0.644506	7.14301e-05	0.000583773	19.7389	3-hydroxymethyl-3-methylglutaryl-CoA lyase [Source:HGNC Symbol;Acc:HGNC:5005]
ENSG00000117360.12	PRPF3	protein_coding	7723.45	-0.621773	3.99125e-05	0.000354073	91.3224	pre-mRNA processing factor 3 [Source:HGNC Symbol;Acc:HGNC:17348]
ENSG00000117394.19	SLC2A1	protein_coding	21416.4	2.19439	6.04437e-58	6.11614e-55	346.77	solute carrier family 2 member 1 [Source:HGNC Symbol;Acc:HGNC:11005]
ENSG00000117399.13	CDC20	protein_coding	3512.12	-1.16743	2.83125e-15	2.16217e-13	131.151	cell division cycle 20 [Source:HGNC Symbol;Acc:HGNC:1723]
ENSG00000117425.13	PTCH2	protein_coding	524.642	-1.10942	3.24494e-06	3.95883e-05	8.93068	patched 2 [Source:HGNC Symbol;Acc:HGNC:9586]
ENSG00000117461.14	PIK3R3	protein_coding	262.5	-1.30744	9.85409e-06	0.000104001	2.81361	phosphoinositide-3-kinase regulatory subunit 3 [Source:HGNC Symbol;Acc:HGNC:8981]
ENSG00000117479.12	SLC19A2	protein_coding	1473.83	-0.611859	0.000255643	0.00175242	26.3796	solute carrier family 19 member 2 [Source:HGNC Symbol;Acc:HGNC:10938]
ENSG00000117525.13	F3	protein_coding	873.07	2.48299	5.66292e-19	7.05251e-17	32.8254	coagulation factor III, tissue factor [Source:HGNC Symbol;Acc:HGNC:3541]
ENSG00000117593.9	DARS2	protein_coding	6006.54	-0.701143	4.05387e-07	6.13958e-06	112.071	aspartyl-tRNA synthetase 2, mitochondrial [Source:HGNC Symbol;Acc:HGNC:25538]
ENSG00000117650.12	NEK2	protein_coding	3093.27	-1.02031	3.79361e-10	1.16988e-08	79.7764	NIMA related kinase 2 [Source:HGNC Symbol;Acc:HGNC:7745]
ENSG00000117724.12	CENPF	protein_coding	25964.5	-0.784749	3.98679e-08	7.72082e-07	158.939	centromere protein F [Source:HGNC Symbol;Acc:HGNC:1857]
ENSG00000117748.9	RPA2	protein_coding	1815.85	-0.683307	4.12146e-06	4.88838e-05	58.8349	replication protein A2 [Source:HGNC Symbol;Acc:HGNC:10290]
ENSG00000117791.15	2002-03-01	protein_coding	1105.67	0.617339	0.000194965	0.00138442	27.345	mitochondrial amidoxime reducing component 2 [Source:HGNC Symbol;Acc:HGNC:26064]
ENSG00000117868.15	ESYT2	protein_coding	19044.4	0.728642	3.95753e-08	7.68255e-07	179.088	extended synaptotagmin 2 [Source:HGNC Symbol;Acc:HGNC:22211]
ENSG00000117877.10	CD3EAP	protein_coding	1789.72	-0.912624	8.1516e-08	1.46151e-06	33.4557	CD3e molecule associated protein [Source:HGNC Symbol;Acc:HGNC:24219]
ENSG00000118193.11	KIF14	protein_coding	5004.16	-0.837193	4.7394e-06	5.53614e-05	54.9304	kinesin family member 14 [Source:HGNC Symbol;Acc:HGNC:19181]
ENSG00000118246.13	FASTKD2	protein_coding	3213.75	-0.592592	0.000331275	0.0021918	37.3201	FAST kinase domains 2 [Source:HGNC Symbol;Acc:HGNC:29160]
ENSG00000118263.14	KLF7	protein_coding	4568.89	1.58405	4.46558e-31	1.53825e-28	39.044	Kruppel like factor 7 [Source:HGNC Symbol;Acc:HGNC:6350]
ENSG00000118363.11	SPCS2	protein_coding	990.16	-0.867233	6.59737e-07	9.53673e-06	23.7561	signal peptidase complex subunit 2 [Source:HGNC Symbol;Acc:HGNC:28962]
ENSG00000118369.12	USP35	protein_coding	766.391	0.653563	0.000201458	0.00142615	8.96002	ubiquitin specific peptidase 35 [Source:HGNC Symbol;Acc:HGNC:20061]
ENSG00000118418.14	HMGN3	protein_coding	2982.94	-0.683837	1.02422e-06	1.4017e-05	220.717	high mobility group nucleosomal binding domain 3 [Source:HGNC Symbol;Acc:HGNC:12312]
ENSG00000118495.18	PLAGL1	protein_coding	753.941	0.804982	5.32151e-05	0.000452258	8.59674	PLAG1 like zinc finger 1 [Source:HGNC Symbol;Acc:HGNC:9046]
ENSG00000118508.4	RAB32	protein_coding	2335.8	0.9329	2.65062e-06	3.30612e-05	139.03	RAB32, member RAS oncogene family [Source:HGNC Symbol;Acc:HGNC:9772]
ENSG00000118655.4	DCLRE1B	protein_coding	759.609	-0.657441	0.000450676	0.00284684	13.5189	DNA cross-link repair 1B [Source:HGNC Symbol;Acc:HGNC:17641]
ENSG00000118689.14	FOXO3	protein_coding	1301.79	0.709909	0.000126812	0.000962988	12.6578	forkhead box O3 [Source:HGNC Symbol;Acc:HGNC:3821]
ENSG00000118707.9	TGIF2	protein_coding	683.783	0.858657	4.08689e-05	0.000361369	13.599	TGFB induced factor homeobox 2 [Source:HGNC Symbol;Acc:HGNC:15764]
ENSG00000118777.10	ABCG2	protein_coding	5974.99	-1.10438	3.09442e-10	9.72791e-09	87.8198	ATP binding cassette subfamily G member 2 (Junior blood group) [Source:HGNC Symbol;Acc:HGNC:74]
ENSG00000118804.8	STBD1	protein_coding	110.159	1.04109	0.00119124	0.006509	2.18791	starch binding domain 1 [Source:HGNC Symbol;Acc:HGNC:24854]
ENSG00000118894.14	EEF2KMT	protein_coding	721.927	-0.826911	6.6798e-06	7.46865e-05	15.471	eukaryotic elongation factor 2 lysine methyltransferase [Source:HGNC Symbol;Acc:HGNC:32221]
ENSG00000118898.15	PPL	protein_coding	2123.88	1.51055	6.70516e-20	9.27834e-18	22.1822	periplakin [Source:HGNC Symbol;Acc:HGNC:9273]
ENSG00000119227.7	PIGZ	protein_coding	181.752	1.10615	6.88508e-05	0.000566986	3.868	phosphatidylinositol glycan anchor biosynthesis class Z [Source:HGNC Symbol;Acc:HGNC:30596]
ENSG00000119285.10	HEATR1	protein_coding	11173.3	-0.708095	2.78398e-07	4.40163e-06	86.5837	HEAT repeat containing 1 [Source:HGNC Symbol;Acc:HGNC:25517]
ENSG00000119314.15	PTBP3	protein_coding	33157.6	0.686291	5.55931e-06	6.38788e-05	273.679	polypyrimidine tract binding protein 3 [Source:HGNC Symbol;Acc:HGNC:10253]
ENSG00000119397.16	CNTRL	protein_coding	2353.7	-0.668261	0.000233429	0.00162059	17.9407	centriolin [Source:HGNC Symbol;Acc:HGNC:1858]
ENSG00000119408.16	NEK6	protein_coding	3215.39	1.18702	1.55378e-10	5.17608e-09	62.1893	NIMA related kinase 6 [Source:HGNC Symbol;Acc:HGNC:7749]
ENSG00000119616.11	FCF1	protein_coding	3037.63	-0.597082	0.000509838	0.0031541	40.7214	FCF1, rRNA-processing protein [Source:HGNC Symbol;Acc:HGNC:20220]
ENSG00000119640.8	ACYP1	protein_coding	393.228	-0.864904	0.0011805	0.0064634	17.592	acylphosphatase 1 [Source:HGNC Symbol;Acc:HGNC:179]
ENSG00000119655.8	NPC2	protein_coding	5179.55	0.944017	3.29569e-10	1.0261e-08	124.228	NPC intracellular cholesterol transporter 2 [Source:HGNC Symbol;Acc:HGNC:14537]
ENSG00000119681.11	LTBP2	protein_coding	2200.37	0.780259	2.52678e-07	4.04234e-06	16.4214	latent transforming growth factor beta binding protein 2 [Source:HGNC Symbol;Acc:HGNC:6715]
ENSG00000119686.9	FLVCR2	protein_coding	504.72	0.864439	0.000152748	0.00112613	7.5102	feline leukemia virus subgroup C cellular receptor family member 2 [Source:HGNC Symbol;Acc:HGNC:20105]
ENSG00000119705.9	SLIRP	protein_coding	2855.21	-0.595146	2.15066e-05	0.000205132	68.0257	SRA stem-loop interacting RNA binding protein [Source:HGNC Symbol;Acc:HGNC:20495]
ENSG00000119801.12	YPEL5	protein_coding	5048.44	0.700908	1.13975e-07	1.99703e-06	94.5086	yippee like 5 [Source:HGNC Symbol;Acc:HGNC:18329]
ENSG00000119812.18	FAM98A	protein_coding	2583.11	-0.794501	1.42103e-08	3.05937e-07	35.2239	family with sequence similarity 98 member A [Source:HGNC Symbol;Acc:HGNC:24520]
ENSG00000119899.12	SLC17A5	protein_coding	2269.88	0.674427	0.000739939	0.00434659	42.6257	solute carrier family 17 member 5 [Source:HGNC Symbol;Acc:HGNC:10933]
ENSG00000119927.13	GPAM	protein_coding	1788.31	-0.652193	2.25262e-05	0.000213525	12.4388	glycerol-3-phosphate acyltransferase, mitochondrial [Source:HGNC Symbol;Acc:HGNC:24865]
ENSG00000119938.8	PPP1R3C	protein_coding	4320.62	2.01418	4.42396e-25	9.18254e-23	140.102	protein phosphatase 1 regulatory subunit 3C [Source:HGNC Symbol;Acc:HGNC:9293]
ENSG00000119950.20	MXI1	protein_coding	2807.47	1.9326	9.81388e-25	2.01122e-22	57.8533	MAX interactor 1, dimerization protein [Source:HGNC Symbol;Acc:HGNC:7534]
ENSG00000119953.12	SMNDC1	protein_coding	1561.32	-0.710325	3.3249e-05	0.000301063	20.9503	survival motor neuron domain containing 1 [Source:HGNC Symbol;Acc:HGNC:16900]
ENSG00000119969.14	HELLS	protein_coding	6274.86	-0.954823	5.45988e-09	1.28669e-07	49.1143	helicase, lymphoid specific [Source:HGNC Symbol;Acc:HGNC:4861]
ENSG00000119977.20	TCTN3	protein_coding	5014.36	-0.590505	1.18789e-05	0.000122575	99.2456	tectonic family member 3 [Source:HGNC Symbol;Acc:HGNC:24519]
ENSG00000120053.10	GOT1	protein_coding	2458.35	-0.586286	0.000335891	0.0022142	65.1263	glutamic-oxaloacetic transaminase 1 [Source:HGNC Symbol;Acc:HGNC:4432]
ENSG00000120129.5	DUSP1	protein_coding	12501.7	1.68297	1.01963e-15	8.29534e-14	529.092	dual specificity phosphatase 1 [Source:HGNC Symbol;Acc:HGNC:3064]
ENSG00000120254.15	MTHFD1L	protein_coding	3927.19	0.982551	2.73443e-11	1.08506e-09	51.8658	methylenetetrahydrofolate dehydrogenase (NADP+ dependent) 1 like [Source:HGNC Symbol;Acc:HGNC:21055]
ENSG00000120519.14	SLC10A7	protein_coding	392.743	-0.59024	0.00625877	0.0253134	3.798	solute carrier family 10 member 7 [Source:HGNC Symbol;Acc:HGNC:23088]
ENSG00000120539.14	MASTL	protein_coding	3122.54	-0.876969	1.35229e-07	2.30458e-06	65.6656	microtubule associated serine/threonine kinase like [Source:HGNC Symbol;Acc:HGNC:19042]
ENSG00000120647.9	CCDC77	protein_coding	1311.87	-0.84126	7.9708e-07	1.12411e-05	26.8994	coiled-coil domain containing 77 [Source:HGNC Symbol;Acc:HGNC:28203]
ENSG00000120699.12	EXOSC8	protein_coding	1419.1	-0.864967	5.69507e-07	8.38974e-06	29.5238	exosome component 8 [Source:HGNC Symbol;Acc:HGNC:17035]
ENSG00000120708.16	TGFBI	protein_coding	112929	1.92872	6.63366e-57	5.96661e-54	1138.52	transforming growth factor beta induced [Source:HGNC Symbol;Acc:HGNC:11771]
ENSG00000120800.4	UTP20	protein_coding	7466.04	-0.634754	6.77624e-05	0.00055908	52.8699	UTP20, small subunit processome component [Source:HGNC Symbol;Acc:HGNC:17897]
ENSG00000120802.13	TMPO	protein_coding	19032.4	-0.967697	1.21011e-11	5.02352e-10	168.907	thymopoietin [Source:HGNC Symbol;Acc:HGNC:11875]
ENSG00000120913.23	PDLIM2	protein_coding	1089.65	1.92693	1.41444e-26	3.2714e-24	6.8281	PDZ and LIM domain 2 [Source:HGNC Symbol;Acc:HGNC:13992]
ENSG00000120942.13	UBIAD1	protein_coding	917.334	-0.63618	0.000184373	0.00132138	11.5976	UbiA prenyltransferase domain containing 1 [Source:HGNC Symbol;Acc:HGNC:30791]
ENSG00000120948.15	TARDBP	protein_coding	1773.07	-1.09506	2.25785e-11	9.04816e-10	22.8201	TAR DNA binding protein [Source:HGNC Symbol;Acc:HGNC:11571]
ENSG00000121152.9	NCAPH	protein_coding	2331.36	-1.06418	8.71806e-13	4.43853e-11	53.777	non-SMC condensin I complex subunit H [Source:HGNC Symbol;Acc:HGNC:1112]
ENSG00000121211.7	MND1	protein_coding	484.995	-1.4177	2.43004e-10	7.82154e-09	28.4843	meiotic nuclear divisions 1 [Source:HGNC Symbol;Acc:HGNC:24839]
ENSG00000121413.12	ZSCAN18	protein_coding	279.633	0.911502	0.000129543	0.00097959	2.33717	zinc finger and SCAN domain containing 18 [Source:HGNC Symbol;Acc:HGNC:21037]
ENSG00000121454.5	LHX4	protein_coding	510.11	-0.616077	0.00236365	0.0114573	5.75861	LIM homeobox 4 [Source:HGNC Symbol;Acc:HGNC:21734]
ENSG00000121579.12	NAA50	protein_coding	10983.4	-0.587672	0.000276018	0.00187368	122.522	N(alpha)-acetyltransferase 50, NatE catalytic subunit [Source:HGNC Symbol;Acc:HGNC:29533]
ENSG00000121621.6	KIF18A	protein_coding	4643.4	-1.07145	5.7494e-10	1.70481e-08	80.2293	kinesin family member 18A [Source:HGNC Symbol;Acc:HGNC:29441]
ENSG00000121653.11	MAPK8IP1	protein_coding	616.622	0.626658	0.000781989	0.00454919	11.0736	mitogen-activated protein kinase 8 interacting protein 1 [Source:HGNC Symbol;Acc:HGNC:6882]
ENSG00000121851.12	POLR3GL	protein_coding	453.88	-0.858656	0.000153314	0.00112928	18.558	RNA polymerase III subunit G like [Source:HGNC Symbol;Acc:HGNC:28466]
ENSG00000121897.13	LIAS	protein_coding	579.621	-0.611956	0.00142638	0.00758892	15.6859	lipoic acid synthetase [Source:HGNC Symbol;Acc:HGNC:16429]
ENSG00000121905.9	HPCA	protein_coding	37.4023	1.18807	0.00400366	0.0176909	1.45727	hippocalcin [Source:HGNC Symbol;Acc:HGNC:5144]
ENSG00000121966.6	CXCR4	protein_coding	426.217	3.64611	1.21975e-32	4.38838e-30	21.6547	C-X-C motif chemokine receptor 4 [Source:HGNC Symbol;Acc:HGNC:2561]
ENSG00000121988.17	ZRANB3	protein_coding	1093.72	-0.586558	0.000511278	0.0031618	8.12341	zinc finger RANBP2-type containing 3 [Source:HGNC Symbol;Acc:HGNC:25249]
ENSG00000122035.6	RASL11A	protein_coding	182.089	0.899719	0.00119898	0.00654466	8.15374	RAS like family 11 member A [Source:HGNC Symbol;Acc:HGNC:23802]
ENSG00000122140.10	MRPS2	protein_coding	2474.17	-0.591835	2.9692e-05	0.000272977	62.8185	mitochondrial ribosomal protein S2 [Source:HGNC Symbol;Acc:HGNC:14495]
ENSG00000122435.9	TRMT13	protein_coding	750.615	-0.819923	0.000169285	0.00123123	14.4678	tRNA methyltransferase 13 homolog [Source:HGNC Symbol;Acc:HGNC:25502]
ENSG00000122566.20	HNRNPA2B1	protein_coding	31119	-1.16192	6.89918e-18	7.65053e-16	315.144	heterogeneous nuclear ribonucleoprotein A2/B1 [Source:HGNC Symbol;Acc:HGNC:5033]
ENSG00000122694.15	GLIPR2	protein_coding	380.732	0.793374	0.00379823	0.0169263	11.4611	GLI pathogenesis related 2 [Source:HGNC Symbol;Acc:HGNC:18007]
ENSG00000122863.5	CHST3	protein_coding	4680.42	0.621692	6.19283e-06	7.01623e-05	39.9501	carbohydrate sulfotransferase 3 [Source:HGNC Symbol;Acc:HGNC:1971]
ENSG00000122884.12	P4HA1	protein_coding	11741.5	1.5569	2.9683e-27	7.39335e-25	322.839	prolyl 4-hydroxylase subunit alpha 1 [Source:HGNC Symbol;Acc:HGNC:8546]
ENSG00000122952.16	ZWINT	protein_coding	4732.51	-1.07674	9.4384e-15	6.79145e-13	149.993	ZW10 interacting kinetochore protein [Source:HGNC Symbol;Acc:HGNC:13195]
ENSG00000122958.14	VPS26A	protein_coding	2260.56	-0.701127	0.000422752	0.00269251	44.6126	VPS26, retromer complex component A [Source:HGNC Symbol;Acc:HGNC:12711]
ENSG00000122966.13	CIT	protein_coding	5361.55	-0.779958	3.12418e-06	3.82895e-05	27.021	citron rho-interacting serine/threonine kinase [Source:HGNC Symbol;Acc:HGNC:1985]
ENSG00000123200.16	ZC3H13	protein_coding	4032.7	-0.689979	2.51497e-05	0.00023597	25.7718	zinc finger CCCH-type containing 13 [Source:HGNC Symbol;Acc:HGNC:20368]
ENSG00000123219.12	CENPK	protein_coding	1908.23	-1.15186	2.46535e-09	6.16909e-08	38.2	centromere protein K [Source:HGNC Symbol;Acc:HGNC:29479]
ENSG00000123240.16	OPTN	protein_coding	4812.44	1.34323	5.79456e-16	4.91173e-14	69.0421	optineurin [Source:HGNC Symbol;Acc:HGNC:17142]
ENSG00000123358.19	NR4A1	protein_coding	1269.45	-1.57159	1.53828e-10	5.13501e-09	15.2194	nuclear receptor subfamily 4 group A member 1 [Source:HGNC Symbol;Acc:HGNC:7980]
ENSG00000123374.10	CDK2	protein_coding	3339.75	-0.659011	8.07751e-06	8.77684e-05	59.5534	cyclin dependent kinase 2 [Source:HGNC Symbol;Acc:HGNC:1771]
ENSG00000123384.13	LRP1	protein_coding	8818.98	1.32454	8.26095e-11	2.92019e-09	38.1754	LDL receptor related protein 1 [Source:HGNC Symbol;Acc:HGNC:6692]
ENSG00000123416.15	TUBA1B	protein_coding	37981.4	-0.624504	1.61249e-05	0.000160456	710.596	tubulin alpha 1b [Source:HGNC Symbol;Acc:HGNC:18809]
ENSG00000123473.15	STIL	protein_coding	2594.5	-0.806803	2.40248e-08	4.92981e-07	24.9929	STIL, centriolar assembly protein [Source:HGNC Symbol;Acc:HGNC:10879]
ENSG00000123485.11	HJURP	protein_coding	6180.61	-0.685802	5.96845e-06	6.7953e-05	113.596	Holliday junction recognition protein [Source:HGNC Symbol;Acc:HGNC:25444]
ENSG00000123595.6	RAB9A	protein_coding	1731.92	0.795797	1.91972e-05	0.000185998	57.0685	RAB9A, member RAS oncogene family [Source:HGNC Symbol;Acc:HGNC:9792]
ENSG00000123700.4	KCNJ2	protein_coding	744.637	-1.21468	8.01007e-06	8.72698e-05	11.6746	potassium voltage-gated channel subfamily J member 2 [Source:HGNC Symbol;Acc:HGNC:6263]
ENSG00000123737.12	EXOSC9	protein_coding	2236.87	-0.875296	4.69301e-09	1.12065e-07	34.1237	exosome component 9 [Source:HGNC Symbol;Acc:HGNC:9137]
ENSG00000123933.14	MXD4	protein_coding	3307.27	0.646394	1.06491e-05	0.000111447	29.5039	MAX dimerization protein 4 [Source:HGNC Symbol;Acc:HGNC:13906]
ENSG00000123975.4	CKS2	protein_coding	4858.2	-0.863188	2.52961e-08	5.15798e-07	580.819	CDC28 protein kinase regulatory subunit 2 [Source:HGNC Symbol;Acc:HGNC:2000]
ENSG00000123999.4	INHA	protein_coding	245.272	2.72173	2.70375e-15	2.07459e-13	16.9085	inhibin alpha subunit [Source:HGNC Symbol;Acc:HGNC:6065]
ENSG00000124006.14	OBSL1	protein_coding	3261.58	1.1218	1.26348e-15	1.01266e-13	22.7846	obscurin like 1 [Source:HGNC Symbol;Acc:HGNC:29092]
ENSG00000124207.16	CSE1L	protein_coding	15830.7	-0.843316	1.42004e-07	2.41496e-06	327.011	chromosome segregation 1 like [Source:HGNC Symbol;Acc:HGNC:2431]
ENSG00000124225.15	PMEPA1	protein_coding	13259.3	0.835473	6.21597e-07	9.08272e-06	147.262	prostate transmembrane protein, androgen induced 1 [Source:HGNC Symbol;Acc:HGNC:14107]
ENSG00000124249.6	KCNK15	protein_coding	132.818	1.6965	1.39108e-06	1.8415e-05	5.03343	potassium two pore domain channel subfamily K member 15 [Source:HGNC Symbol;Acc:HGNC:13814]
ENSG00000124383.8	MPHOSPH10	protein_coding	3017.84	-0.700484	1.64381e-06	2.14921e-05	43.5428	M-phase phosphoprotein 10 [Source:HGNC Symbol;Acc:HGNC:7213]
ENSG00000124507.10	PACSIN1	protein_coding	90.0448	-1.22758	0.00114447	0.0062981	1.57777	protein kinase C and casein kinase substrate in neurons 1 [Source:HGNC Symbol;Acc:HGNC:8570]
ENSG00000124562.9	SNRPC	protein_coding	2829.71	-0.614612	9.50098e-06	0.0001008	138.856	small nuclear ribonucleoprotein polypeptide C [Source:HGNC Symbol;Acc:HGNC:11157]
ENSG00000124575.6	HIST1H1D	protein_coding	13017.8	-0.83164	1.17587e-06	1.57724e-05	1350.44	histone cluster 1 H1 family member d [Source:HGNC Symbol;Acc:HGNC:4717]
ENSG00000124588.19	NQO2	protein_coding	1885.93	-0.947453	2.63657e-08	5.34243e-07	11.9125	N-ribosyldihydronicotinamide:quinone reductase 2 [Source:HGNC Symbol;Acc:HGNC:7856]
ENSG00000124593.14	PRICKLE4	protein_coding	324.195	0.62707	0.00543001	0.0226482	4.50297
ENSG00000124635.8	HIST1H2BJ	protein_coding	6760.95	-0.71862	6.36809e-08	1.17158e-06	463.362	histone cluster 1 H2B family member j [Source:HGNC Symbol;Acc:HGNC:4761]
ENSG00000124664.10	SPDEF	protein_coding	2350.67	-1.12806	1.87129e-06	2.41336e-05	97.9826	SAM pointed domain containing ETS transcription factor [Source:HGNC Symbol;Acc:HGNC:17257]
ENSG00000124762.13	CDKN1A	protein_coding	5377.83	-0.85341	4.57259e-08	8.68899e-07	129.295	cyclin dependent kinase inhibitor 1A [Source:HGNC Symbol;Acc:HGNC:1784]
ENSG00000124787.13	RPP40	protein_coding	595.324	-0.791634	9.99581e-05	0.00078142	21.2	ribonuclease P/MRP subunit p40 [Source:HGNC Symbol;Acc:HGNC:20992]
ENSG00000124795.14	DEK	protein_coding	12001.7	-0.588972	5.87778e-05	0.000493319	191.272	DEK proto-oncogene [Source:HGNC Symbol;Acc:HGNC:2768]
ENSG00000124839.12	RAB17	protein_coding	574.277	0.928421	0.00265308	0.0125668	18.4964	RAB17, member RAS oncogene family [Source:HGNC Symbol;Acc:HGNC:16523]
ENSG00000124942.13	AHNAK	protein_coding	69686.4	0.941631	1.64638e-07	2.74792e-06	279.76	AHNAK nucleoprotein [Source:HGNC Symbol;Acc:HGNC:347]
ENSG00000125148.6	MT2A	protein_coding	2969.68	1.31182	2.932e-11	1.15216e-09	180.45	metallothionein 2A [Source:HGNC Symbol;Acc:HGNC:7406]
ENSG00000125170.10	DOK4	protein_coding	10535.8	-0.690356	3.69671e-05	0.000331027	142.552	docking protein 4 [Source:HGNC Symbol;Acc:HGNC:19868]
ENSG00000125319.14	C17orf53	protein_coding	608.9	-0.783772	0.000136015	0.00101993	15.2313	chromosome 17 open reading frame 53 [Source:HGNC Symbol;Acc:HGNC:28460]
ENSG00000125351.10	UPF3B	protein_coding	715.619	-0.854645	7.83261e-06	8.55091e-05	19.7123	UPF3B, regulator of nonsense mediated mRNA decay [Source:HGNC Symbol;Acc:HGNC:20439]
ENSG00000125434.10	SLC25A35	protein_coding	501.923	-0.752955	0.00143403	0.00761069	8.87393	solute carrier family 25 member 35 [Source:HGNC Symbol;Acc:HGNC:31921]
ENSG00000125449.6	ARMC7	protein_coding	782.586	-0.734786	3.82419e-05	0.000340559	18.3693	armadillo repeat containing 7 [Source:HGNC Symbol;Acc:HGNC:26168]
ENSG00000125454.11	SLC25A19	protein_coding	521.643	-0.80223	0.000110722	0.000855648	11.0304	solute carrier family 25 member 19 [Source:HGNC Symbol;Acc:HGNC:14409]
ENSG00000125459.14	MSTO1	protein_coding	355.867	-0.945478	2.23061e-05	0.000211685	5.86461	misato 1, mitochondrial distribution and morphology regulator [Source:HGNC Symbol;Acc:HGNC:29678]
ENSG00000125510.15	OPRL1	protein_coding	359.695	1.03673	0.000106387	0.000825302	7.7881	opioid related nociceptin receptor 1 [Source:HGNC Symbol;Acc:HGNC:8155]
ENSG00000125629.14	INSIG2	protein_coding	1645.79	1.4488	1.10283e-21	1.84071e-19	31.3361	insulin induced gene 2 [Source:HGNC Symbol;Acc:HGNC:20452]
ENSG00000125630.15	POLR1B	protein_coding	2924.42	-0.759837	1.07133e-07	1.89354e-06	32.6668	RNA polymerase I subunit B [Source:HGNC Symbol;Acc:HGNC:20454]
ENSG00000125637.15	PSD4	protein_coding	3363.89	1.78094	6.55136e-14	4.11111e-12	23.1526	pleckstrin and Sec7 domain containing 4 [Source:HGNC Symbol;Acc:HGNC:19096]
ENSG00000125703.14	ATG4C	protein_coding	957.353	-0.803042	0.000155255	0.0011405	24.2185	autophagy related 4C cysteine peptidase [Source:HGNC Symbol;Acc:HGNC:16040]
ENSG00000125826.19	RBCK1	protein_coding	8134.31	0.724675	8.59482e-06	9.252e-05	130.696	RANBP2-type and C3HC4-type zinc finger containing 1 [Source:HGNC Symbol;Acc:HGNC:15864]
ENSG00000125848.9	FLRT3	protein_coding	5735.48	-0.674147	0.00245417	0.0118288	74.4911	fibronectin leucine rich transmembrane protein 3 [Source:HGNC Symbol;Acc:HGNC:3762]
ENSG00000125864.11	BFSP1	protein_coding	1236.54	1.38675	2.27427e-08	4.69648e-07	33.6246	beaded filament structural protein 1 [Source:HGNC Symbol;Acc:HGNC:1040]
ENSG00000125895.5	TMEM74B	protein_coding	615.365	1.3291	1.10909e-09	3.07468e-08	22.7088	transmembrane protein 74B [Source:HGNC Symbol;Acc:HGNC:15893]
ENSG00000125944.18	HNRNPR	protein_coding	9954.27	-0.632327	6.40809e-07	9.31301e-06	75.4978	heterogeneous nuclear ribonucleoprotein R [Source:HGNC Symbol;Acc:HGNC:5047]
ENSG00000126005.16	MMP24-AS1	protein_coding	1830.82	0.67364	0.000481969	0.00300697	24.0192	MMP24 opposite strand [Source:HGNC Symbol;Acc:HGNC:44421]
ENSG00000126215.13	XRCC3	protein_coding	1892.94	-0.977689	2.02552e-07	3.31914e-06	19.7171	X-ray repair cross complementing 3 [Source:HGNC Symbol;Acc:HGNC:12830]
ENSG00000126216.12	TUBGCP3	protein_coding	1291.39	-0.704962	6.35493e-06	7.1848e-05	12.1123	tubulin gamma complex associated protein 3 [Source:HGNC Symbol;Acc:HGNC:18598]
ENSG00000126249.7	PDCD2L	protein_coding	708.242	-0.685688	0.000528222	0.00325415	34.5284	programmed cell death 2 like [Source:HGNC Symbol;Acc:HGNC:28194]
ENSG00000126453.9	BCL2L12	protein_coding	797.314	-0.820961	1.85751e-05	0.000181382	32.1868	BCL2 like 12 [Source:HGNC Symbol;Acc:HGNC:13787]
ENSG00000126602.10	TRAP1	protein_coding	7084.64	-0.903236	8.39045e-11	2.95497e-09	91.8589	TNF receptor associated protein 1 [Source:HGNC Symbol;Acc:HGNC:16264]
ENSG00000126653.15	NSRP1	protein_coding	1423.69	-0.721505	0.000299548	0.00201231	19.5482	nuclear speckle splicing regulatory protein 1 [Source:HGNC Symbol;Acc:HGNC:25305]
ENSG00000126787.12	DLGAP5	protein_coding	5768.8	-0.979899	5.42681e-11	1.99682e-09	120.743	DLG associated protein 5 [Source:HGNC Symbol;Acc:HGNC:16864]
ENSG00000126803.9	HSPA2	protein_coding	13262.8	1.32833	0.000654745	0.00390723	238.05	heat shock protein family A (Hsp70) member 2 [Source:HGNC Symbol;Acc:HGNC:5235]
ENSG00000126804.13	ZBTB1	protein_coding	4946.48	0.768551	2.75018e-06	3.41452e-05	59.2752	zinc finger and BTB domain containing 1 [Source:HGNC Symbol;Acc:HGNC:20259]
ENSG00000126883.16	NUP214	protein_coding	4832.2	-0.661832	3.0192e-06	3.72e-05	23.5622	nucleoporin 214 [Source:HGNC Symbol;Acc:HGNC:8064]
ENSG00000126953.5	TIMM8A	protein_coding	561.038	-1.01594	1.08038e-06	1.46739e-05	16.8802	translocase of inner mitochondrial membrane 8A [Source:HGNC Symbol;Acc:HGNC:11817]
ENSG00000127129.9	EDN2	protein_coding	185.607	2.26594	1.90395e-10	6.20221e-09	14.2319	endothelin 2 [Source:HGNC Symbol;Acc:HGNC:3177]
ENSG00000127152.17	BCL11B	protein_coding	406.371	-0.674442	0.00275175	0.0129659	3.6733	B-cell CLL/lymphoma 11B [Source:HGNC Symbol;Acc:HGNC:13222]
ENSG00000127423.10	AUNIP	protein_coding	429.012	-1.14557	2.15734e-07	3.51028e-06	16.4695	aurora kinase A and ninein interacting protein [Source:HGNC Symbol;Acc:HGNC:28363]
ENSG00000127561.14	SYNGR3	protein_coding	1007.98	1.81	3.74227e-18	4.22109e-16	26.1246	synaptogyrin 3 [Source:HGNC Symbol;Acc:HGNC:11501]
ENSG00000127564.16	PKMYT1	protein_coding	1013.59	-0.854379	3.31043e-07	5.14356e-06	14.2284	protein kinase, membrane associated tyrosine/threonine 1 [Source:HGNC Symbol;Acc:HGNC:29650]
ENSG00000127585.11	FBXL16	protein_coding	118.222	0.95185	0.00251079	0.0120443	2.13821	F-box and leucine rich repeat protein 16 [Source:HGNC Symbol;Acc:HGNC:14150]
ENSG00000127586.16	CHTF18	protein_coding	995.902	-0.913708	1.29756e-05	0.000132539	14.7231	chromosome transmission fidelity factor 18 [Source:HGNC Symbol;Acc:HGNC:18435]
ENSG00000127603.23	MACF1	protein_coding	32183.7	0.674428	5.22329e-05	0.000444906	48.3136	microtubule-actin crosslinking factor 1 [Source:HGNC Symbol;Acc:HGNC:13664]
ENSG00000127663.14	KDM4B	protein_coding	1857.23	1.23073	6.35195e-16	5.30093e-14	9.08843	lysine demethylase 4B [Source:HGNC Symbol;Acc:HGNC:29136]
ENSG00000127774.6	EMC6	protein_coding	1380.4	-0.643343	5.1404e-05	0.00043876	116.493	ER membrane protein complex subunit 6 [Source:HGNC Symbol;Acc:HGNC:28430]
ENSG00000127804.12	METTL16	protein_coding	5702.81	-0.85643	1.67472e-10	5.51091e-09	44.2745	methyltransferase like 16 [Source:HGNC Symbol;Acc:HGNC:28484]
ENSG00000127946.16	HIP1	protein_coding	17363.1	0.898749	6.07366e-09	1.4169e-07	129.328	huntingtin interacting protein 1 [Source:HGNC Symbol;Acc:HGNC:4913]
ENSG00000128228.4	SDF2L1	protein_coding	661.235	-1.62674	1.38791e-17	1.49801e-15	49.3917	stromal cell derived factor 2 like 1 [Source:HGNC Symbol;Acc:HGNC:10676]
ENSG00000128242.12	GAL3ST1	protein_coding	3825.46	2.17325	2.45455e-28	6.51461e-26	110.507	galactose-3-O-sulfotransferase 1 [Source:HGNC Symbol;Acc:HGNC:24240]
ENSG00000128335.13	APOL2	protein_coding	3287.16	2.5342	7.19214e-69	1.16441e-65	77.5369	apolipoprotein L2 [Source:HGNC Symbol;Acc:HGNC:619]
ENSG00000128408.8	RIBC2	protein_coding	225.716	-1.09525	2.19459e-05	0.000208634	9.55614	RIB43A domain with coiled-coils 2 [Source:HGNC Symbol;Acc:HGNC:13241]
ENSG00000128487.16	SPECC1	protein_coding	15057	0.608688	1.147e-06	1.54492e-05	68.5798	sperm antigen with calponin homology and coiled-coil domains 1 [Source:HGNC Symbol;Acc:HGNC:30615]
ENSG00000128512.19	DOCK4	protein_coding	3326.51	1.04371	1.52001e-06	1.9991e-05	22.9099	dedicator of cytokinesis 4 [Source:HGNC Symbol;Acc:HGNC:19192]
ENSG00000128513.14	POT1	protein_coding	2278.17	-0.599103	0.000265298	0.00180926	25.8352	protection of telomeres 1 [Source:HGNC Symbol;Acc:HGNC:17284]
ENSG00000128578.9	STRIP2	protein_coding	874.288	-0.679937	0.000358365	0.00234327	10.7593	striatin interacting protein 2 [Source:HGNC Symbol;Acc:HGNC:22209]
ENSG00000128585.17	MKLN1	protein_coding	17205.9	0.861037	3.71026e-05	0.000332057	99.1326	muskelin 1 [Source:HGNC Symbol;Acc:HGNC:7109]
ENSG00000128626.11	MRPS12	protein_coding	4599.88	-0.631847	4.43113e-05	0.000386322	138.424	mitochondrial ribosomal protein S12 [Source:HGNC Symbol;Acc:HGNC:10380]
ENSG00000128694.11	OSGEPL1	protein_coding	633.521	-0.663847	0.00290026	0.0135631	13.4615	O-sialoglycoprotein endopeptidase like 1 [Source:HGNC Symbol;Acc:HGNC:23075]
ENSG00000128708.12	HAT1	protein_coding	2977.49	-0.914796	1.51083e-09	4.04971e-08	32.3873	histone acetyltransferase 1 [Source:HGNC Symbol;Acc:HGNC:4821]
ENSG00000128872.9	TMOD2	protein_coding	912.96	0.946149	4.4262e-08	8.44054e-07	5.31738	tropomodulin 2 [Source:HGNC Symbol;Acc:HGNC:11872]
ENSG00000128923.10	FAM63B	protein_coding	2844.28	0.957589	1.61956e-09	4.30554e-08	19.4855	MINDY lysine 48 deubiquitinase 2 [Source:HGNC Symbol;Acc:HGNC:26954]
ENSG00000128965.11	CHAC1	protein_coding	247.695	-0.725813	0.0139605	0.0481818	8.71392	ChaC glutathione specific gamma-glutamylcyclotransferase 1 [Source:HGNC Symbol;Acc:HGNC:28680]
ENSG00000129003.15	VPS13C	protein_coding	24825.1	0.595128	7.28546e-06	8.03486e-05	76.2999	vacuolar protein sorting 13 homolog C [Source:HGNC Symbol;Acc:HGNC:23594]
ENSG00000129028.8	THAP10	protein_coding	537.418	-0.786915	0.000248227	0.00170794	16.825	THAP domain containing 10 [Source:HGNC Symbol;Acc:HGNC:23193]
ENSG00000129173.12	E2F8	protein_coding	553.493	-1.46094	2.05574e-12	9.73171e-11	10.3961	E2F transcription factor 8 [Source:HGNC Symbol;Acc:HGNC:24727]
ENSG00000129195.15	FAM64A	protein_coding	1825.53	-0.762206	3.44293e-07	5.32387e-06	44.0696	PICALM interacting mitotic regulator [Source:HGNC Symbol;Acc:HGNC:25483]
ENSG00000129347.19	KRI1	protein_coding	958.827	-0.738024	2.65063e-05	0.000247484	15.8702	KRI1 homolog [Source:HGNC Symbol;Acc:HGNC:25769]
ENSG00000129474.15	AJUBA	protein_coding	9253.4	1.30696	6.81685e-15	4.99389e-13	116.107	ajuba LIM protein [Source:HGNC Symbol;Acc:HGNC:20250]
ENSG00000129484.13	PARP2	protein_coding	1447.39	-1.08726	4.33208e-09	1.0437e-07	25.7336	poly(ADP-ribose) polymerase 2 [Source:HGNC Symbol;Acc:HGNC:272]
ENSG00000129514.5	FOXA1	protein_coding	1884.85	-0.90681	3.35276e-07	5.18941e-06	34.1282	forkhead box A1 [Source:HGNC Symbol;Acc:HGNC:5021]
ENSG00000129521.13	EGLN3	protein_coding	9470.62	3.64079	1.0502e-77	2.12535e-74	132.034	egl-9 family hypoxia inducible factor 3 [Source:HGNC Symbol;Acc:HGNC:14661]
ENSG00000129667.12	RHBDF2	protein_coding	2908.18	0.656846	0.000246017	0.00169562	27.1641	rhomboid 5 homolog 2 [Source:HGNC Symbol;Acc:HGNC:20788]
ENSG00000129810.14	SGOL1	protein_coding	1396.69	-1.2291	5.5673e-10	1.663e-08	30.402	shugoshin 1 [Source:HGNC Symbol;Acc:HGNC:25088]
ENSG00000129946.10	SHC2	protein_coding	369.547	1.82778	1.91068e-09	4.94151e-08	9.36537	SHC adaptor protein 2 [Source:HGNC Symbol;Acc:HGNC:29869]
ENSG00000129951.18	PLPPR3	protein_coding	230.126	0.767166	0.0144318	0.0494529	7.25505	phospholipid phosphatase related 3 [Source:HGNC Symbol;Acc:HGNC:23497]
ENSG00000130038.9	CRACR2A	protein_coding	286.659	-0.769926	0.00839472	0.0319714	1.71505	calcium release activated channel regulator 2A [Source:HGNC Symbol;Acc:HGNC:28657]
ENSG00000130119.15	GNL3L	protein_coding	4082.55	-0.622789	4.64639e-05	0.000402273	101.936	G protein nucleolar 3 like [Source:HGNC Symbol;Acc:HGNC:25553]
ENSG00000130204.12	TOMM40	protein_coding	6162.75	-0.807845	7.93926e-08	1.42977e-06	113.841	translocase of outer mitochondrial membrane 40 [Source:HGNC Symbol;Acc:HGNC:18001]
ENSG00000130254.11	SAFB2	protein_coding	2055.41	-0.77247	9.27813e-07	1.28828e-05	21.9455	scaffold attachment factor B2 [Source:HGNC Symbol;Acc:HGNC:21605]
ENSG00000130347.12	RTN4IP1	protein_coding	710.799	-0.757909	7.2215e-05	0.000588701	24.705	reticulon 4 interacting protein 1 [Source:HGNC Symbol;Acc:HGNC:18647]
ENSG00000130449.5	ZSWIM6	protein_coding	2630.06	-0.777949	0.000478874	0.00299112	32.7557	zinc finger SWIM-type containing 6 [Source:HGNC Symbol;Acc:HGNC:29316]
ENSG00000130508.10	PXDN	protein_coding	2549.16	1.42492	2.80724e-16	2.49721e-14	17.7995	peroxidasin [Source:HGNC Symbol;Acc:HGNC:14966]
ENSG00000130518.16	KIAA1683	protein_coding	463.451	1.33887	4.92275e-11	1.82378e-09	3.71715	KIAA1683 [Source:HGNC Symbol;Acc:HGNC:29350]
ENSG00000130520.10	LSM4	protein_coding	5602.85	-0.602534	3.05121e-05	0.000279366	119.506	LSM4 homolog, U6 small nuclear RNA and mRNA degradation associated [Source:HGNC Symbol;Acc:HGNC:17259]
ENSG00000130584.10	ZBTB46	protein_coding	274.762	1.27154	2.04185e-06	2.61163e-05	3.58491	zinc finger and BTB domain containing 46 [Source:HGNC Symbol;Acc:HGNC:16094]
ENSG00000130635.15	COL5A1	protein_coding	8242.51	1.63293	1.00459e-15	8.21434e-14	65.9576	collagen type V alpha 1 chain [Source:HGNC Symbol;Acc:HGNC:2209]
ENSG00000130695.13	CEP85	protein_coding	1950.33	-0.588334	6.83174e-05	0.00056288	24.5342	centrosomal protein 85 [Source:HGNC Symbol;Acc:HGNC:25309]
ENSG00000130699.16	TAF4	protein_coding	646.729	-0.619944	0.00459809	0.0198409	4.20266	TATA-box binding protein associated factor 4 [Source:HGNC Symbol;Acc:HGNC:11537]
ENSG00000130707.17	ASS1	protein_coding	1478.61	0.608084	0.0121394	0.0431001	37.8996	argininosuccinate synthase 1 [Source:HGNC Symbol;Acc:HGNC:758]
ENSG00000130713.15	EXOSC2	protein_coding	3891.84	-0.658264	5.5872e-06	6.41538e-05	64.0171	exosome component 2 [Source:HGNC Symbol;Acc:HGNC:17097]
ENSG00000130725.7	UBE2M	protein_coding	3695.52	-0.608029	6.52014e-06	7.33572e-05	129.606	ubiquitin conjugating enzyme E2 M [Source:HGNC Symbol;Acc:HGNC:12491]
ENSG00000130766.4	SESN2	protein_coding	787.665	-0.661416	0.000355113	0.00232482	14.7124	sestrin 2 [Source:HGNC Symbol;Acc:HGNC:20746]
ENSG00000130816.14	DNMT1	protein_coding	6931.79	-0.832277	1.14296e-07	1.99966e-06	49.2587	DNA methyltransferase 1 [Source:HGNC Symbol;Acc:HGNC:2976]
ENSG00000130821.15	SLC6A8	protein_coding	444.841	1.21023	2.52669e-05	0.000236706	7.8339	solute carrier family 6 member 8 [Source:HGNC Symbol;Acc:HGNC:11055]
ENSG00000130822.15	PNCK	protein_coding	32.9246	1.35992	0.00067439	0.00400821	1.06447	pregnancy up-regulated nonubiquitous CaM kinase [Source:HGNC Symbol;Acc:HGNC:13415]
ENSG00000130826.15	DKC1	protein_coding	5051.58	-0.945144	3.83928e-12	1.76085e-10	86.5152	dyskerin pseudouridine synthase 1 [Source:HGNC Symbol;Acc:HGNC:2890]
ENSG00000130827.6	PLXNA3	protein_coding	996.445	1.24483	9.67321e-09	2.14827e-07	7.27576	plexin A3 [Source:HGNC Symbol;Acc:HGNC:9101]
ENSG00000130935.9	NOL11	protein_coding	6299.11	-0.775884	9.87835e-08	1.75748e-06	96.4214	nucleolar protein 11 [Source:HGNC Symbol;Acc:HGNC:24557]
ENSG00000131016.16	AKAP12	protein_coding	17571.5	0.884648	2.32218e-08	4.7893e-07	186.932	A-kinase anchoring protein 12 [Source:HGNC Symbol;Acc:HGNC:370]
ENSG00000131018.22	SYNE1	protein_coding	9506.53	0.730689	1.77858e-08	3.76408e-07	13.3043	spectrin repeat containing nuclear envelope protein 1 [Source:HGNC Symbol;Acc:HGNC:17089]
ENSG00000131094.3	C1QL1	protein_coding	542.312	1.26511	3.9315e-09	9.5286e-08	29.7946	complement C1q like 1 [Source:HGNC Symbol;Acc:HGNC:24182]
ENSG00000131153.8	GINS2	protein_coding	1937.58	-1.17306	2.61725e-13	1.49201e-11	46.7258	GINS complex subunit 2 [Source:HGNC Symbol;Acc:HGNC:24575]
ENSG00000131351.14	HAUS8	protein_coding	585.978	-0.979751	4.1386e-06	4.90512e-05	8.48502	HAUS augmin like complex subunit 8 [Source:HGNC Symbol;Acc:HGNC:30532]
ENSG00000131370.15	SH3BP5	protein_coding	844.484	-0.817931	1.19392e-05	0.000123119	14.0673	SH3 domain binding protein 5 [Source:HGNC Symbol;Acc:HGNC:10827]
ENSG00000131389.16	SLC6A6	protein_coding	19773	1.35163	4.96466e-20	6.92913e-18	191.063	solute carrier family 6 member 6 [Source:HGNC Symbol;Acc:HGNC:11052]
ENSG00000131398.13	KCNC3	protein_coding	97.6197	1.26241	0.000334884	0.00220936	1.3056	potassium voltage-gated channel subfamily C member 3 [Source:HGNC Symbol;Acc:HGNC:6235]
ENSG00000131459.12	GFPT2	protein_coding	2408.26	1.07459	1.12653e-12	5.61187e-11	33.4103	glutamine-fructose-6-phosphate transaminase 2 [Source:HGNC Symbol;Acc:HGNC:4242]
ENSG00000131467.10	PSME3	protein_coding	10849.7	-0.592448	6.5369e-06	7.34948e-05	138.566	proteasome activator subunit 3 [Source:HGNC Symbol;Acc:HGNC:9570]
ENSG00000131470.14	PSMC3IP	protein_coding	669.96	-0.830686	7.46903e-06	8.21492e-05	18.3711	PSMC3 interacting protein [Source:HGNC Symbol;Acc:HGNC:17928]
ENSG00000131747.14	TOP2A	protein_coding	53706.2	-0.967495	1.41375e-08	3.04776e-07	641.271	DNA topoisomerase II alpha [Source:HGNC Symbol;Acc:HGNC:11989]
ENSG00000131759.17	RARA	protein_coding	1653.19	0.593526	0.00038392	0.00248174	23.3177	retinoic acid receptor alpha [Source:HGNC Symbol;Acc:HGNC:9864]
ENSG00000131845.14	ZNF304	protein_coding	679.434	1.00152	5.06062e-08	9.52691e-07	9.69161	zinc finger protein 304 [Source:HGNC Symbol;Acc:HGNC:13505]
ENSG00000131943.17	C19orf12	protein_coding	2759.98	0.609309	0.000176104	0.00127282	51.7394	chromosome 19 open reading frame 12 [Source:HGNC Symbol;Acc:HGNC:25443]
ENSG00000131944.9	FAAP24	protein_coding	670.83	-0.802548	0.000160289	0.00117371	20.9385	Fanconi anemia core complex associated protein 24 [Source:HGNC Symbol;Acc:HGNC:28467]
ENSG00000131981.15	LGALS3	protein_coding	3177.22	0.595195	6.82905e-05	0.00056288	86.8156	galectin 3 [Source:HGNC Symbol;Acc:HGNC:6563]
ENSG00000132003.9	ZSWIM4	protein_coding	660.247	0.841486	7.1001e-05	0.00058144	9.53676	zinc finger SWIM-type containing 4 [Source:HGNC Symbol;Acc:HGNC:25704]
ENSG00000132141.13	CCT6B	protein_coding	208.067	0.903964	0.000937022	0.00529693	3.30031	chaperonin containing TCP1 subunit 6B [Source:HGNC Symbol;Acc:HGNC:1621]
ENSG00000132199.18	ENOSF1	protein_coding	4820.47	1.0224	6.18171e-11	2.2541e-09	30.6872	enolase superfamily member 1 [Source:HGNC Symbol;Acc:HGNC:30365]
ENSG00000132334.16	PTPRE	protein_coding	502.879	1.42258	1.10924e-10	3.83731e-09	3.43936	protein tyrosine phosphatase, receptor type E [Source:HGNC Symbol;Acc:HGNC:9669]
ENSG00000132359.13	RAP1GAP2	protein_coding	3749.9	0.776625	2.57859e-06	3.23123e-05	36.0703	RAP1 GTPase activating protein 2 [Source:HGNC Symbol;Acc:HGNC:29176]
ENSG00000132383.11	RPA1	protein_coding	5390.52	-0.855633	1.33458e-08	2.88477e-07	70.97	replication protein A1 [Source:HGNC Symbol;Acc:HGNC:10289]
ENSG00000132423.10	COQ3	protein_coding	448.72	-1.21343	3.45833e-08	6.79494e-07	25.2607	coenzyme Q3, methyltransferase [Source:HGNC Symbol;Acc:HGNC:18175]
ENSG00000132436.11	FIGNL1	protein_coding	2649.56	-0.974765	6.91136e-08	1.26008e-06	43.5191	fidgetin like 1 [Source:HGNC Symbol;Acc:HGNC:13286]
ENSG00000132467.3	UTP3	protein_coding	1310.25	-0.908299	8.20528e-06	8.89776e-05	46.2757	UTP3, small subunit processome component [Source:HGNC Symbol;Acc:HGNC:24477]
ENSG00000132470.13	ITGB4	protein_coding	14239.3	1.1475	3.62559e-09	8.82681e-08	177.649	integrin subunit beta 4 [Source:HGNC Symbol;Acc:HGNC:6158]
ENSG00000132481.6	TRIM47	protein_coding	3422.66	0.610826	0.000800054	0.00464005	70.2782	tripartite motif containing 47 [Source:HGNC Symbol;Acc:HGNC:19020]
ENSG00000132507.17	EIF5A	protein_coding	17534.1	-0.8277	1.26021e-10	4.27732e-09	425.195	eukaryotic translation initiation factor 5A [Source:HGNC Symbol;Acc:HGNC:3300]
ENSG00000132541.10	HRSP12	protein_coding	1346.8	-0.665073	0.000896662	0.00510083	64.8056	reactive intermediate imine deaminase A homolog [Source:HGNC Symbol;Acc:HGNC:16897]
ENSG00000132623.15	ANKEF1	protein_coding	3743.73	-0.642176	2.13306e-06	2.71709e-05	42.5495	ankyrin repeat and EF-hand domain containing 1 [Source:HGNC Symbol;Acc:HGNC:15803]
ENSG00000132646.10	PCNA	protein_coding	19557	-1.38004	1.38527e-25	2.99034e-23	1071.37	proliferating cell nuclear antigen [Source:HGNC Symbol;Acc:HGNC:8729]
ENSG00000132768.13	DPH2	protein_coding	1684.73	-0.611839	0.00245011	0.0118198	37.8927	DPH2 homolog [Source:HGNC Symbol;Acc:HGNC:3004]
ENSG00000132773.11	TOE1	protein_coding	641.508	-0.802922	2.1514e-05	0.000205132	16.3408	target of EGR1, exonuclease [Source:HGNC Symbol;Acc:HGNC:15954]
ENSG00000132780.16	NASP	protein_coding	7203.35	-0.832364	1.86335e-09	4.84231e-08	61.0006	nuclear autoantigenic sperm protein [Source:HGNC Symbol;Acc:HGNC:7644]
ENSG00000132793.11	LPIN3	protein_coding	2483.3	0.927216	1.84564e-07	3.04287e-06	37.4413	lipin 3 [Source:HGNC Symbol;Acc:HGNC:14451]
ENSG00000132849.19	INADL	protein_coding	7658.95	0.595104	6.021e-06	6.8455e-05	39.2902	PATJ, crumbs cell polarity complex component [Source:HGNC Symbol;Acc:HGNC:28881]
ENSG00000132879.13	FBXO44	protein_coding	1650.59	0.704022	0.00025375	0.0017415	31.0813	F-box protein 44 [Source:HGNC Symbol;Acc:HGNC:24847]
ENSG00000133119.12	RFC3	protein_coding	2550.07	-1.32552	7.70033e-13	3.97033e-11	81.8898	replication factor C subunit 3 [Source:HGNC Symbol;Acc:HGNC:9971]
ENSG00000133121.20	STARD13	protein_coding	554.444	0.754074	0.000315129	0.00209783	4.26613	StAR related lipid transfer domain containing 13 [Source:HGNC Symbol;Acc:HGNC:19164]
ENSG00000133216.16	EPHB2	protein_coding	4814.94	1.11993	6.05714e-16	5.08109e-14	28.1056	EPH receptor B2 [Source:HGNC Symbol;Acc:HGNC:3393]
ENSG00000133226.16	SRRM1	protein_coding	4957.76	-0.795287	2.81413e-09	6.98786e-08	40.1051	serine and arginine repetitive matrix 1 [Source:HGNC Symbol;Acc:HGNC:16638]
ENSG00000133302.12	SLF1	protein_coding	2098.63	-0.946695	1.79923e-06	2.33597e-05	24.4154	SMC5-SMC6 complex localization factor 1 [Source:HGNC Symbol;Acc:HGNC:25408]
ENSG00000133315.10	MACROD1	protein_coding	665.072	0.655101	0.00332739	0.0151619	20.0765	MACRO domain containing 1 [Source:HGNC Symbol;Acc:HGNC:29598]
ENSG00000133393.12	FOPNL	protein_coding	4664.09	-0.690713	9.82333e-06	0.00010388	140.872	FGFR1OP N-terminal like [Source:HGNC Symbol;Acc:HGNC:26435]
ENSG00000133519.12	ZDHHC8P1	transcribed_unprocessed_pseudogene	591.832	-0.663823	0.00860535	0.0326049	13.5041	zinc finger DHHC-type containing 8 pseudogene 1 [Source:HGNC Symbol;Acc:HGNC:26461]
ENSG00000133619.17	KRBA1	protein_coding	695.83	0.783	0.000129224	0.00097763	8.53618	KRAB-A domain containing 1 [Source:HGNC Symbol;Acc:HGNC:22228]
ENSG00000133627.17	ACTR3B	protein_coding	297.72	-0.987618	4.9024e-05	0.000421144	3.84784	ARP3 actin related protein 3 homolog B [Source:HGNC Symbol;Acc:HGNC:17256]
ENSG00000133661.15	SFTPD	protein_coding	37.3765	1.15546	0.00557452	0.0231	2.24737	surfactant protein D [Source:HGNC Symbol;Acc:HGNC:10803]
ENSG00000133704.9	IPO8	protein_coding	4555.41	-0.710177	8.08995e-05	0.000648719	44.0252	importin 8 [Source:HGNC Symbol;Acc:HGNC:9853]
ENSG00000133739.15	LRRCC1	protein_coding	457.809	-1.04918	2.34437e-06	2.95603e-05	7.25035	leucine rich repeat and coiled-coil centrosomal protein 1 [Source:HGNC Symbol;Acc:HGNC:29373]
ENSG00000133805.15	AMPD3	protein_coding	650.305	1.47672	1.05623e-13	6.45298e-12	7.54703	adenosine monophosphate deaminase 3 [Source:HGNC Symbol;Acc:HGNC:470]
ENSG00000133818.12	RRAS2	protein_coding	2105.73	0.64672	0.000130133	0.000983135	38.4264	RAS related 2 [Source:HGNC Symbol;Acc:HGNC:17271]
ENSG00000133874.1	RNF122	protein_coding	415.737	0.807238	0.000144662	0.00107484	15.1108	ring finger protein 122 [Source:HGNC Symbol;Acc:HGNC:21147]
ENSG00000133985.2	TTC9	protein_coding	996.332	0.788729	1.87225e-06	2.41336e-05	12.0496	tetratricopeptide repeat domain 9 [Source:HGNC Symbol;Acc:HGNC:20267]
ENSG00000134007.3	ADAM20	protein_coding	33.0912	1.13479	0.00712062	0.0280017	1.18377	ADAM metallopeptidase domain 20 [Source:HGNC Symbol;Acc:HGNC:199]
ENSG00000134013.15	LOXL2	protein_coding	25824.3	3.26104	6.58991e-130	1.06691e-125	398.014	lysyl oxidase like 2 [Source:HGNC Symbol;Acc:HGNC:6666]
ENSG00000134030.13	CTIF	protein_coding	2463.29	1.07491	5.25612e-13	2.76288e-11	21.2928	cap binding complex dependent translation initiation factor [Source:HGNC Symbol;Acc:HGNC:23925]
ENSG00000134049.4	IER3IP1	protein_coding	1621.79	-0.622347	0.00295811	0.0137818	35.0806	immediate early response 3 interacting protein 1 [Source:HGNC Symbol;Acc:HGNC:18550]
ENSG00000134057.14	CCNB1	protein_coding	9452.18	-1.01372	1.83397e-12	8.78459e-11	284.088	cyclin B1 [Source:HGNC Symbol;Acc:HGNC:1579]
ENSG00000134107.4	BHLHE40	protein_coding	17565.4	1.12497	1.60687e-13	9.4946e-12	318.083	basic helix-loop-helix family member e40 [Source:HGNC Symbol;Acc:HGNC:1046]
ENSG00000134186.11	PRPF38B	protein_coding	2563.85	-0.843735	8.42977e-09	1.90346e-07	30.5161	pre-mRNA processing factor 38B [Source:HGNC Symbol;Acc:HGNC:25512]
ENSG00000134198.9	TSPAN2	protein_coding	121.053	1.77944	8.1397e-08	1.46099e-06	3.17841	tetraspanin 2 [Source:HGNC Symbol;Acc:HGNC:20659]
ENSG00000134202.10	GSTM3	protein_coding	780.673	1.02083	3.30556e-06	4.02383e-05	26.209	glutathione S-transferase mu 3 [Source:HGNC Symbol;Acc:HGNC:4635]
ENSG00000134215.15	VAV3	protein_coding	3506.28	0.750819	0.000944089	0.00532572	35.7737	vav guanine nucleotide exchange factor 3 [Source:HGNC Symbol;Acc:HGNC:12659]
ENSG00000134222.16	PSRC1	protein_coding	1210.11	-0.860534	1.73329e-07	2.87815e-06	29.5317	proline and serine rich coiled-coil 1 [Source:HGNC Symbol;Acc:HGNC:24472]
ENSG00000134250.17	NOTCH2	protein_coding	11134.1	0.616576	0.00125657	0.0068108	48.1246	notch 2 [Source:HGNC Symbol;Acc:HGNC:7882]
ENSG00000134258.16	VTCN1	protein_coding	265.3	0.917987	0.0115483	0.041401	9.12319	V-set domain containing T-cell activation inhibitor 1 [Source:HGNC Symbol;Acc:HGNC:28873]
ENSG00000134294.13	SLC38A2	protein_coding	77978.2	1.11024	6.90702e-13	3.59565e-11	832.024	solute carrier family 38 member 2 [Source:HGNC Symbol;Acc:HGNC:13448]
ENSG00000134297.6	PLEKHA8P1	transcribed_processed_pseudogene	384.558	0.99813	4.22599e-05	0.000372448	11.7382	pleckstrin homology domain containing A8 pseudogene 1 [Source:HGNC Symbol;Acc:HGNC:30222]
ENSG00000134333.13	LDHA	protein_coding	149052	1.37021	1.24643e-28	3.47927e-26	1733.48	lactate dehydrogenase A [Source:HGNC Symbol;Acc:HGNC:6535]
ENSG00000134369.15	NAV1	protein_coding	2064.54	0.979494	1.13744e-07	1.99514e-06	7.19459	neuron navigator 1 [Source:HGNC Symbol;Acc:HGNC:15989]
ENSG00000134490.13	TMEM241	protein_coding	566.598	-0.637827	0.000846194	0.00485467	7.09225	transmembrane protein 241 [Source:HGNC Symbol;Acc:HGNC:31723]
ENSG00000134504.12	KCTD1	protein_coding	2607.43	0.796222	2.11045e-08	4.4088e-07	22.1521	potassium channel tetramerization domain containing 1 [Source:HGNC Symbol;Acc:HGNC:18249]
ENSG00000134533.6	RERG	protein_coding	539.248	1.62101	4.83285e-08	9.12996e-07	12.6735	RAS like estrogen regulated growth inhibitor [Source:HGNC Symbol;Acc:HGNC:15980]
ENSG00000134590.13	FAM127A	protein_coding	2995.96	0.774377	1.44605e-06	1.90803e-05	172.214	retrotransposon Gag like 8C [Source:HGNC Symbol;Acc:HGNC:2569]
ENSG00000134668.12	SPOCD1	protein_coding	147.924	0.848582	0.00401359	0.0177202	1.37014	SPOC domain containing 1 [Source:HGNC Symbol;Acc:HGNC:26338]
ENSG00000134684.10	YARS	protein_coding	5497.5	-1.01277	1.41487e-12	6.89962e-11	50.716	tyrosyl-tRNA synthetase [Source:HGNC Symbol;Acc:HGNC:12840]
ENSG00000134686.16	PHC2	protein_coding	3039.46	0.693594	4.07238e-05	0.00036048	38.6989	polyhomeotic homolog 2 [Source:HGNC Symbol;Acc:HGNC:3183]
ENSG00000134690.10	CDCA8	protein_coding	1690.31	-0.921184	6.935e-08	1.26297e-06	49.6077	cell division cycle associated 8 [Source:HGNC Symbol;Acc:HGNC:14629]
ENSG00000134697.12	GNL2	protein_coding	3126.85	-0.61478	1.93644e-05	0.000187408	34.3276	G protein nucleolar 2 [Source:HGNC Symbol;Acc:HGNC:29925]
ENSG00000134698.10	AGO4	protein_coding	1217.17	0.587428	0.000460042	0.00289246	9.76577	argonaute 4, RISC catalytic component [Source:HGNC Symbol;Acc:HGNC:18424]
ENSG00000134709.10	HOOK1	protein_coding	575.377	-0.684248	0.000861644	0.00492873	5.84214	hook microtubule tethering protein 1 [Source:HGNC Symbol;Acc:HGNC:19884]
ENSG00000134748.12	PRPF38A	protein_coding	1967.75	-0.780039	5.2496e-07	7.78306e-06	23.464	pre-mRNA processing factor 38A [Source:HGNC Symbol;Acc:HGNC:25930]
ENSG00000134755.14	DSC2	protein_coding	1707.89	1.17862	3.15216e-10	9.87448e-09	11.18	desmocollin 2 [Source:HGNC Symbol;Acc:HGNC:3036]
ENSG00000134758.13	RNF138	protein_coding	842.514	-0.716581	0.00212445	0.0105055	17.6042	ring finger protein 138 [Source:HGNC Symbol;Acc:HGNC:17765]
ENSG00000134809.8	TIMM10	protein_coding	1778.56	-0.739205	6.52268e-07	9.43719e-06	150.4	translocase of inner mitochondrial membrane 10 [Source:HGNC Symbol;Acc:HGNC:11814]
ENSG00000134901.12	KDELC1	protein_coding	659.834	-0.595938	0.0015643	0.00817495	18.5677	KDEL motif containing 1 [Source:HGNC Symbol;Acc:HGNC:19350]
ENSG00000134962.6	KLB	protein_coding	753.99	0.931945	0.00191614	0.00963126	19.4922	klotho beta [Source:HGNC Symbol;Acc:HGNC:15527]
ENSG00000134986.13	NREP	protein_coding	1455.1	0.602047	0.00123582	0.00671407	10.8409	neuronal regeneration related protein [Source:HGNC Symbol;Acc:HGNC:16834]
ENSG00000135047.14	CTSL	protein_coding	19575.7	-0.995933	7.72126e-11	2.73707e-09	585.7	cathepsin L [Source:HGNC Symbol;Acc:HGNC:2537]
ENSG00000135111.14	TBX3	protein_coding	3255.01	-1.08745	9.81358e-12	4.14835e-10	43.4375	T-box 3 [Source:HGNC Symbol;Acc:HGNC:11602]
ENSG00000135119.14	RNFT2	protein_coding	2034.61	-0.7372	1.42472e-05	0.000143446	20.4867	ring finger protein, transmembrane 2 [Source:HGNC Symbol;Acc:HGNC:25905]
ENSG00000135127.11	CCDC64	protein_coding	1714.37	0.600638	0.00925694	0.034604	20.5131	BICD family like cargo adaptor 1 [Source:HGNC Symbol;Acc:HGNC:28095]
ENSG00000135148.11	TRAFD1	protein_coding	3835.54	0.812432	1.23886e-05	0.000127428	75.8846	TRAF-type zinc finger domain containing 1 [Source:HGNC Symbol;Acc:HGNC:24808]
ENSG00000135245.9	HILPDA	protein_coding	9472.44	1.45796	1.39757e-28	3.83502e-26	352.606	hypoxia inducible lipid droplet associated [Source:HGNC Symbol;Acc:HGNC:28859]
ENSG00000135249.7	RINT1	protein_coding	2192.98	-0.602491	6.23097e-05	0.000519462	40.1161	RAD50 interactor 1 [Source:HGNC Symbol;Acc:HGNC:21876]
ENSG00000135269.17	TES	protein_coding	4760.9	0.676699	4.52454e-07	6.7952e-06	71.5549	testin LIM domain protein [Source:HGNC Symbol;Acc:HGNC:14620]
ENSG00000135318.11	NT5E	protein_coding	5485.25	-0.656283	0.000125274	0.000953542	94.2178	5'-nucleotidase ecto [Source:HGNC Symbol;Acc:HGNC:8021]
ENSG00000135334.8	AKIRIN2	protein_coding	748.501	-0.634965	0.00309105	0.0142779	24.5835	akirin 2 [Source:HGNC Symbol;Acc:HGNC:21407]
ENSG00000135336.14	ORC3	protein_coding	2414.64	-0.758632	9.94129e-07	1.3652e-05	47.4613	origin recognition complex subunit 3 [Source:HGNC Symbol;Acc:HGNC:8489]
ENSG00000135378.3	PRRG4	protein_coding	731.429	1.45653	2.21379e-07	3.58823e-06	12.3528	proline rich and Gla domain 4 [Source:HGNC Symbol;Acc:HGNC:30799]
ENSG00000135406.13	PRPH	protein_coding	66.3194	1.04049	0.00532195	0.0223045	1.26658	peripherin [Source:HGNC Symbol;Acc:HGNC:9461]
ENSG00000135407.10	AVIL	protein_coding	255.263	0.96025	0.00321738	0.0147688	4.16901	advillin [Source:HGNC Symbol;Acc:HGNC:14188]
ENSG00000135414.9	GDF11	protein_coding	511.284	-0.592024	0.00403611	0.0178002	3.94519	growth differentiation factor 11 [Source:HGNC Symbol;Acc:HGNC:4216]
ENSG00000135451.12	TROAP	protein_coding	1420.95	-0.892681	5.97598e-08	1.10699e-06	25.2903	trophinin associated protein [Source:HGNC Symbol;Acc:HGNC:12327]
ENSG00000135521.8	LTV1	protein_coding	1243.68	-1.06165	8.40434e-10	2.39553e-08	51.1844	LTV1 ribosome biogenesis factor [Source:HGNC Symbol;Acc:HGNC:21173]
ENSG00000135525.18	MAP7	protein_coding	9707.83	-1.18144	2.74641e-16	2.4817e-14	166.625	microtubule associated protein 7 [Source:HGNC Symbol;Acc:HGNC:6869]
ENSG00000135549.14	PKIB	protein_coding	242.015	-0.855109	0.00239036	0.0115695	5.7009	cAMP-dependent protein kinase inhibitor beta [Source:HGNC Symbol;Acc:HGNC:9018]
ENSG00000135624.15	CCT7	protein_coding	25810.6	-0.598877	7.14384e-06	7.90559e-05	488.859	chaperonin containing TCP1 subunit 7 [Source:HGNC Symbol;Acc:HGNC:1622]
ENSG00000135643.4	KCNMB4	protein_coding	201.292	1.99477	2.56153e-10	8.21212e-09	3.95814	potassium calcium-activated channel subfamily M regulatory beta subunit 4 [Source:HGNC Symbol;Acc:HGNC:6289]
ENSG00000135677.10	GNS	protein_coding	21543.7	0.589321	2.59658e-06	3.24623e-05	201.722	glucosamine (N-acetyl)-6-sulfatase [Source:HGNC Symbol;Acc:HGNC:4422]
ENSG00000135679.21	MDM2	protein_coding	12821.7	-0.744366	7.10647e-09	1.62966e-07	66.3735	MDM2 proto-oncogene [Source:HGNC Symbol;Acc:HGNC:6973]
ENSG00000135698.9	MPHOSPH6	protein_coding	975.079	-0.804528	3.13554e-06	3.83997e-05	31.8015	M-phase phosphoprotein 6 [Source:HGNC Symbol;Acc:HGNC:7214]
ENSG00000135709.12	KIAA0513	protein_coding	1063.94	0.938157	1.43135e-05	0.000143845	8.7646	KIAA0513 [Source:HGNC Symbol;Acc:HGNC:29058]
ENSG00000135722.8	FBXL8	protein_coding	316.626	0.698951	0.00278926	0.0131121	6.85021	F-box and leucine rich repeat protein 8 [Source:HGNC Symbol;Acc:HGNC:17875]
ENSG00000135763.9	URB2	protein_coding	2866.73	-0.648534	0.000442796	0.00280143	33.3895	URB2 ribosome biogenesis 2 homolog (S. cerevisiae) [Source:HGNC Symbol;Acc:HGNC:28967]
ENSG00000135842.16	FAM129A	protein_coding	191.85	-0.97813	0.0010248	0.00573107	1.9758	family with sequence similarity 129 member A [Source:HGNC Symbol;Acc:HGNC:16784]
ENSG00000135924.15	DNAJB2	protein_coding	3115.88	1.45677	3.98515e-13	2.17115e-11	43.2834	DnaJ heat shock protein family (Hsp40) member B2 [Source:HGNC Symbol;Acc:HGNC:5228]
ENSG00000135926.12	TMBIM1	protein_coding	5813.75	0.84276	6.44679e-09	1.49105e-07	71.0549	transmembrane BAX inhibitor motif containing 1 [Source:HGNC Symbol;Acc:HGNC:23410]
ENSG00000135976.16	ANKRD36	protein_coding	2201.89	0.597386	4.68139e-05	0.00040487	15.2985	ankyrin repeat domain 36 [Source:HGNC Symbol;Acc:HGNC:24079]
ENSG00000136002.16	ARHGEF4	protein_coding	173.909	-0.752215	0.00680694	0.0270554	1.21481	Rho guanine nucleotide exchange factor 4 [Source:HGNC Symbol;Acc:HGNC:684]
ENSG00000136003.15	ISCU	protein_coding	3535.75	-0.587596	5.2295e-05	0.000444906	50.4449	iron-sulfur cluster assembly enzyme [Source:HGNC Symbol;Acc:HGNC:29882]
ENSG00000136048.13	DRAM1	protein_coding	4742.66	0.680233	0.000185642	0.00132812	75.2575	DNA damage regulated autophagy modulator 1 [Source:HGNC Symbol;Acc:HGNC:25645]
ENSG00000136052.9	SLC41A2	protein_coding	5952.88	0.614076	6.37944e-06	7.20245e-05	74.0746	solute carrier family 41 member 2 [Source:HGNC Symbol;Acc:HGNC:31045]
ENSG00000136108.14	CKAP2	protein_coding	3908.01	-0.902009	9.66822e-08	1.72199e-06	63.8217	cytoskeleton associated protein 2 [Source:HGNC Symbol;Acc:HGNC:1990]
ENSG00000136111.12	TBC1D4	protein_coding	3349.88	0.602576	0.00834693	0.0317974	35.9554	TBC1 domain family member 4 [Source:HGNC Symbol;Acc:HGNC:19165]
ENSG00000136114.15	THSD1	protein_coding	303.617	-0.835177	0.000835827	0.00480258	6.87539	thrombospondin type 1 domain containing 1 [Source:HGNC Symbol;Acc:HGNC:17754]
ENSG00000136122.15	BORA	protein_coding	920.137	-1.03612	8.20516e-09	1.85792e-07	24.0493	bora, aurora kinase A activator [Source:HGNC Symbol;Acc:HGNC:24724]
ENSG00000136158.10	SPRY2	protein_coding	1458.41	0.686323	0.000517619	0.00319857	31.9857	sprouty RTK signaling antagonist 2 [Source:HGNC Symbol;Acc:HGNC:11270]
ENSG00000136235.15	GPNMB	protein_coding	297.26	0.795141	0.00124233	0.00674266	3.14507	glycoprotein nmb [Source:HGNC Symbol;Acc:HGNC:4462]
ENSG00000136279.18	DBNL	protein_coding	7001.72	0.735339	1.2725e-08	2.75794e-07	35.4876	drebrin like [Source:HGNC Symbol;Acc:HGNC:2696]
ENSG00000136379.11	ABHD17C	protein_coding	1379.48	-0.681891	1.42765e-05	0.000143652	25.0761	abhydrolase domain containing 17C [Source:HGNC Symbol;Acc:HGNC:26925]
ENSG00000136383.6	ALPK3	protein_coding	245.444	1.34483	6.15555e-07	9.00256e-06	1.58945	alpha kinase 3 [Source:HGNC Symbol;Acc:HGNC:17574]
ENSG00000136444.9	RSAD1	protein_coding	2489.67	-0.651741	0.000269778	0.00183748	39.046	radical S-adenosyl methionine domain containing 1 [Source:HGNC Symbol;Acc:HGNC:25634]
ENSG00000136527.17	TRA2B	protein_coding	10741.4	-0.683714	6.33015e-07	9.22909e-06	62.2335	transformer 2 beta homolog [Source:HGNC Symbol;Acc:HGNC:10781]
ENSG00000136628.17	EPRS	protein_coding	17606.2	-0.603076	3.39021e-06	4.1176e-05	215.248	glutamyl-prolyl-tRNA synthetase [Source:HGNC Symbol;Acc:HGNC:3418]
ENSG00000136811.16	ODF2	protein_coding	3516.04	-0.721577	4.484e-07	6.74683e-06	37.6295	outer dense fiber of sperm tails 2 [Source:HGNC Symbol;Acc:HGNC:8114]
ENSG00000136824.18	SMC2	protein_coding	8852.28	-0.772956	2.17778e-07	3.53644e-06	100.53	structural maintenance of chromosomes 2 [Source:HGNC Symbol;Acc:HGNC:14011]
ENSG00000136830.11	FAM129B	protein_coding	18265.4	0.765315	1.54101e-09	4.11022e-08	258.96	family with sequence similarity 129 member B [Source:HGNC Symbol;Acc:HGNC:25282]
ENSG00000136861.17	CDK5RAP2	protein_coding	4770.49	-0.660642	5.82169e-06	6.6469e-05	30.938	CDK5 regulatory subunit associated protein 2 [Source:HGNC Symbol;Acc:HGNC:18672]
ENSG00000136875.12	PRPF4	protein_coding	4786.45	-0.786229	6.76853e-08	1.23822e-06	90.9882	pre-mRNA processing factor 4 [Source:HGNC Symbol;Acc:HGNC:17349]
ENSG00000136897.7	MRPL50	protein_coding	3733.55	-0.598054	5.3617e-05	0.000454958	75.9764	mitochondrial ribosomal protein L50 [Source:HGNC Symbol;Acc:HGNC:16654]
ENSG00000136933.16	RABEPK	protein_coding	1206.57	-0.865907	4.95807e-07	7.38628e-06	26.8229	Rab9 effector protein with kelch motifs [Source:HGNC Symbol;Acc:HGNC:16896]
ENSG00000136937.12	NCBP1	protein_coding	6241.8	-0.682095	1.07485e-05	0.00011227	79.9025	nuclear cap binding protein subunit 1 [Source:HGNC Symbol;Acc:HGNC:7658]
ENSG00000136938.8	ANP32B	protein_coding	3425.6	-1.24197	7.45092e-11	2.66292e-09	140.63	acidic nuclear phosphoprotein 32 family member B [Source:HGNC Symbol;Acc:HGNC:16677]
ENSG00000136943.10	CTSV	protein_coding	812.032	-0.710152	0.00240738	0.0116414	32.7423	cathepsin V [Source:HGNC Symbol;Acc:HGNC:2538]
ENSG00000136982.5	DSCC1	protein_coding	934.747	-1.37291	1.36559e-10	4.58692e-09	32.8843	DNA replication and sister chromatid cohesion 1 [Source:HGNC Symbol;Acc:HGNC:24453]
ENSG00000137133.10	HINT2	protein_coding	1463.29	-0.643187	4.69399e-05	0.000405743	39.795	histidine triad nucleotide binding protein 2 [Source:HGNC Symbol;Acc:HGNC:18344]
ENSG00000137145.20	DENND4C	protein_coding	12568.6	0.939336	1.04429e-11	4.39338e-10	101.71	DENN domain containing 4C [Source:HGNC Symbol;Acc:HGNC:26079]
ENSG00000137168.7	PPIL1	protein_coding	2600.64	-0.861254	1.28643e-07	2.21332e-06	100.794	peptidylprolyl isomerase like 1 [Source:HGNC Symbol;Acc:HGNC:9260]
ENSG00000137193.13	PIM1	protein_coding	1902.99	0.81656	2.53256e-06	3.176e-05	46.5061	Pim-1 proto-oncogene, serine/threonine kinase [Source:HGNC Symbol;Acc:HGNC:8986]
ENSG00000137310.11	TCF19	protein_coding	1313.44	-0.723546	6.9383e-06	7.70975e-05	25.7523	transcription factor 19 [Source:HGNC Symbol;Acc:HGNC:11629]
ENSG00000137331.11	IER3	protein_coding	8556.81	1.49414	3.03399e-13	1.70557e-11	527.867	immediate early response 3 [Source:HGNC Symbol;Acc:HGNC:5392]
ENSG00000137337.14	MDC1	protein_coding	2011.07	-0.967023	6.44442e-10	1.897e-08	18.4017	mediator of DNA damage checkpoint 1 [Source:HGNC Symbol;Acc:HGNC:21163]
ENSG00000137364.4	TPMT	protein_coding	1020.87	-0.876503	8.26939e-06	8.95528e-05	25.2767	thiopurine S-methyltransferase [Source:HGNC Symbol;Acc:HGNC:12014]
ENSG00000137474.19	MYO7A	protein_coding	685.233	0.865963	0.00117312	0.00643825	5.34836	myosin VIIA [Source:HGNC Symbol;Acc:HGNC:7606]
ENSG00000137496.17	IL18BP	protein_coding	764.465	0.691644	0.000275483	0.00187083	12.0452	interleukin 18 binding protein [Source:HGNC Symbol;Acc:HGNC:5987]
ENSG00000137501.17	SYTL2	protein_coding	3350.53	1.4684	3.53896e-11	1.35293e-09	25.7355	synaptotagmin like 2 [Source:HGNC Symbol;Acc:HGNC:15585]
ENSG00000137563.11	GGH	protein_coding	3913.22	-0.680408	5.34616e-05	0.000453877	88.7299	gamma-glutamyl hydrolase [Source:HGNC Symbol;Acc:HGNC:4248]
ENSG00000137692.11	DCUN1D5	protein_coding	1575.6	-0.689588	8.76101e-05	0.000693259	66.2538	defective in cullin neddylation 1 domain containing 5 [Source:HGNC Symbol;Acc:HGNC:28409]
ENSG00000137699.16	TRIM29	protein_coding	266.815	0.677818	0.00522452	0.0220006	1.7202	tripartite motif containing 29 [Source:HGNC Symbol;Acc:HGNC:17274]
ENSG00000137726.16	FXYD6	protein_coding	173.412	1.65162	1.06999e-06	1.45695e-05	3.31088	FXYD domain containing ion transport regulator 6 [Source:HGNC Symbol;Acc:HGNC:4030]
ENSG00000137801.10	THBS1	protein_coding	10908.8	-0.733652	0.000546573	0.00335317	80.8184	thrombospondin 1 [Source:HGNC Symbol;Acc:HGNC:11785]
ENSG00000137807.13	KIF23	protein_coding	9782.85	-0.745892	1.04506e-07	1.85317e-06	109.054	kinesin family member 23 [Source:HGNC Symbol;Acc:HGNC:6392]
ENSG00000137812.19	CASC5	protein_coding	4628.56	-0.69933	5.49057e-06	6.32686e-05	32.3229	kinetochore scaffold 1 [Source:HGNC Symbol;Acc:HGNC:24054]
ENSG00000137819.13	PAQR5	protein_coding	11438.3	0.669144	0.00170986	0.00878813	131.416	progestin and adipoQ receptor family member 5 [Source:HGNC Symbol;Acc:HGNC:29645]
ENSG00000137831.14	UACA	protein_coding	13538.7	1.36643	1.47994e-20	2.19818e-18	98.318	uveal autoantigen with coiled-coil domains and ankyrin repeats [Source:HGNC Symbol;Acc:HGNC:15947]
ENSG00000137878.16	GCOM1	protein_coding	92.8741	1.54725	0.000105063	0.000816985	1.44404	GRINL1A complex locus 1 [Source:HGNC Symbol;Acc:HGNC:26424]
ENSG00000137936.16	BCAR3	protein_coding	2862.23	0.62741	0.00539216	0.0225288	40.4028	breast cancer anti-estrogen resistance 3 [Source:HGNC Symbol;Acc:HGNC:973]
ENSG00000137962.12	ARHGAP29	protein_coding	4806.28	0.616106	7.21956e-06	7.9778e-05	19.8068	Rho GTPase activating protein 29 [Source:HGNC Symbol;Acc:HGNC:30207]
ENSG00000138035.14	PNPT1	protein_coding	3634.53	-0.717976	1.88655e-05	0.000183553	49.8826	polyribonucleotide nucleotidyltransferase 1 [Source:HGNC Symbol;Acc:HGNC:23166]
ENSG00000138050.14	THUMPD2	protein_coding	1119.35	-0.59801	0.00118167	0.00646543	20.9339	THUMP domain containing 2 [Source:HGNC Symbol;Acc:HGNC:14890]
ENSG00000138071.13	ACTR2	protein_coding	13396.7	-0.810099	6.31849e-07	9.2242e-06	247.133	ARP2 actin related protein 2 homolog [Source:HGNC Symbol;Acc:HGNC:169]
ENSG00000138074.14	SLC5A6	protein_coding	2997.15	-0.712074	3.46741e-05	0.000312918	37.2509	solute carrier family 5 member 6 [Source:HGNC Symbol;Acc:HGNC:11041]
ENSG00000138092.10	CENPO	protein_coding	3375.3	-0.802461	2.19987e-08	4.56614e-07	42.9697	centromere protein O [Source:HGNC Symbol;Acc:HGNC:28152]
ENSG00000138119.16	MYOF	protein_coding	50979.5	1.02712	1.0305e-12	5.23002e-11	400.226	myoferlin [Source:HGNC Symbol;Acc:HGNC:3656]
ENSG00000138160.5	KIF11	protein_coding	9013.09	-1.14752	6.84306e-11	2.48406e-09	152.721	kinesin family member 11 [Source:HGNC Symbol;Acc:HGNC:6388]
ENSG00000138162.18	TACC2	protein_coding	6477.39	-0.963443	1.45743e-09	3.93264e-08	23.8981	transforming acidic coiled-coil containing protein 2 [Source:HGNC Symbol;Acc:HGNC:11523]
ENSG00000138166.5	DUSP5	protein_coding	2975.17	1.10674	7.80037e-07	1.10392e-05	91.2348	dual specificity phosphatase 5 [Source:HGNC Symbol;Acc:HGNC:3071]
ENSG00000138182.14	KIF20B	protein_coding	4995.24	-0.782094	1.68918e-06	2.2037e-05	54.1181	kinesin family member 20B [Source:HGNC Symbol;Acc:HGNC:7212]
ENSG00000138346.14	DNA2	protein_coding	2970.39	-0.991787	8.80215e-08	1.57292e-06	50.5734	DNA replication helicase/nuclease 2 [Source:HGNC Symbol;Acc:HGNC:2939]
ENSG00000138356.13	AOX1	protein_coding	430.495	0.700622	0.00709162	0.0278944	6.04734	aldehyde oxidase 1 [Source:HGNC Symbol;Acc:HGNC:553]
ENSG00000138363.14	ATIC	protein_coding	4859.73	-0.79358	6.11814e-09	1.42317e-07	86.8397	5-aminoimidazole-4-carboxamide ribonucleotide formyltransferase/IMP cyclohydrolase [Source:HGNC Symbol;Acc:HGNC:794]
ENSG00000138378.17	STAT4	protein_coding	902.757	-0.762566	0.000284145	0.00191679	16.2738	signal transducer and activator of transcription 4 [Source:HGNC Symbol;Acc:HGNC:11365]
ENSG00000138385.15	SSB	protein_coding	6818.13	-0.82212	2.98377e-08	5.97122e-07	96.72	Sjogren syndrome antigen B [Source:HGNC Symbol;Acc:HGNC:11316]
ENSG00000138398.15	PPIG	protein_coding	3956.44	-0.609147	2.42386e-05	0.000228326	34.2204	peptidylprolyl isomerase G [Source:HGNC Symbol;Acc:HGNC:14650]
ENSG00000138442.9	WDR12	protein_coding	2562.08	-0.676087	2.69492e-05	0.000250896	19.2699	WD repeat domain 12 [Source:HGNC Symbol;Acc:HGNC:14098]
ENSG00000138448.11	ITGAV	protein_coding	27995.5	0.865713	5.72494e-05	0.00048149	253.557	integrin subunit alpha V [Source:HGNC Symbol;Acc:HGNC:6150]
ENSG00000138587.5	MNS1	protein_coding	379.589	-1.52787	1.48715e-07	2.51852e-06	13.2761	meiosis specific nuclear structural 1 [Source:HGNC Symbol;Acc:HGNC:29636]
ENSG00000138640.14	FAM13A	protein_coding	4912.15	1.32305	1.54338e-13	9.25457e-12	31.5475	family with sequence similarity 13 member A [Source:HGNC Symbol;Acc:HGNC:19367]
ENSG00000138658.15	ZGRF1	protein_coding	1382.29	-0.888825	3.55869e-06	4.29964e-05	12.1183	zinc finger GRF-type containing 1 [Source:HGNC Symbol;Acc:HGNC:25654]
ENSG00000138668.18	HNRNPD	protein_coding	2622.95	-0.824748	2.99598e-05	0.000275127	25.5736	heterogeneous nuclear ribonucleoprotein D [Source:HGNC Symbol;Acc:HGNC:5036]
ENSG00000138678.10	GPAT3	protein_coding	1789.67	-1.25718	6.33416e-13	3.30806e-11	41.9551	glycerol-3-phosphate acyltransferase 3 [Source:HGNC Symbol;Acc:HGNC:28157]
ENSG00000138735.15	PDE5A	protein_coding	1191.72	0.881726	2.12652e-06	2.71089e-05	8.1727	phosphodiesterase 5A [Source:HGNC Symbol;Acc:HGNC:8784]
ENSG00000138759.17	FRAS1	protein_coding	10005.9	0.587488	0.000277188	0.00188005	32.5465	Fraser extracellular matrix complex subunit 1 [Source:HGNC Symbol;Acc:HGNC:19185]
ENSG00000138764.13	CCNG2	protein_coding	1715.75	1.09917	2.49645e-10	8.01934e-09	17.7935	cyclin G2 [Source:HGNC Symbol;Acc:HGNC:1593]
ENSG00000138772.12	ANXA3	protein_coding	8811.63	1.03821	5.49081e-11	2.01123e-09	118.249	annexin A3 [Source:HGNC Symbol;Acc:HGNC:541]
ENSG00000138778.11	CENPE	protein_coding	4426.83	-1.16175	7.48523e-11	2.66929e-09	38.5525	centromere protein E [Source:HGNC Symbol;Acc:HGNC:1856]
ENSG00000138792.9	ENPEP	protein_coding	249.373	-1.36752	2.40508e-06	3.02315e-05	2.98297	glutamyl aminopeptidase [Source:HGNC Symbol;Acc:HGNC:3355]
ENSG00000138796.15	HADH	protein_coding	1244.9	-0.737091	2.41123e-05	0.00022736	28.8425	hydroxyacyl-CoA dehydrogenase [Source:HGNC Symbol;Acc:HGNC:4799]
ENSG00000138834.12	MAPK8IP3	protein_coding	4824.33	0.90565	7.99842e-09	1.81619e-07	31.066	mitogen-activated protein kinase 8 interacting protein 3 [Source:HGNC Symbol;Acc:HGNC:6884]
ENSG00000139112.10	GABARAPL1	protein_coding	3659.36	1.13114	3.27746e-15	2.47953e-13	59.6712	GABA type A receptor associated protein like 1 [Source:HGNC Symbol;Acc:HGNC:4068]
ENSG00000139132.14	FGD4	protein_coding	2370	0.700311	3.32903e-05	0.000301269	15.6723	FYVE, RhoGEF and PH domain containing 4 [Source:HGNC Symbol;Acc:HGNC:19125]
ENSG00000139133.6	ALG10	protein_coding	681.16	-0.647106	0.00697326	0.0275426	12.1359	ALG10, alpha-1,2-glucosyltransferase [Source:HGNC Symbol;Acc:HGNC:23162]
ENSG00000139211.6	AMIGO2	protein_coding	57923.1	0.810312	0.000162659	0.00118946	1082.02	adhesion molecule with Ig like domain 2 [Source:HGNC Symbol;Acc:HGNC:24073]
ENSG00000139278.9	GLIPR1	protein_coding	4809.31	1.71639	6.05874e-14	3.83168e-12	70.4096	GLI pathogenesis related 1 [Source:HGNC Symbol;Acc:HGNC:17001]
ENSG00000139289.13	PHLDA1	protein_coding	9627.88	-0.867043	4.97638e-08	9.38109e-07	91.2679	pleckstrin homology like domain family A member 1 [Source:HGNC Symbol;Acc:HGNC:8933]
ENSG00000139343.10	SNRPF	protein_coding	2175.93	-1.05913	1.62686e-13	9.57777e-12	50.348	small nuclear ribonucleoprotein polypeptide F [Source:HGNC Symbol;Acc:HGNC:11162]
ENSG00000139410.14	SDSL	protein_coding	462.344	-1.21687	1.82269e-07	3.01423e-06	17.0066	serine dehydratase like [Source:HGNC Symbol;Acc:HGNC:30404]
ENSG00000139579.12	NABP2	protein_coding	2657.43	-0.776561	1.25237e-07	2.16161e-06	78.9045	nucleic acid binding protein 2 [Source:HGNC Symbol;Acc:HGNC:28412]
ENSG00000139618.14	BRCA2	protein_coding	2775.81	-0.971397	7.63395e-08	1.38494e-06	18.3064	BRCA2, DNA repair associated [Source:HGNC Symbol;Acc:HGNC:1101]
ENSG00000139718.10	SETD1B	protein_coding	1033.07	-0.757124	3.94447e-05	0.000350499	8.78251	SET domain containing 1B [Source:HGNC Symbol;Acc:HGNC:29187]
ENSG00000139734.17	DIAPH3	protein_coding	1817.23	-0.989643	1.28053e-06	1.70914e-05	19.3509	diaphanous related formin 3 [Source:HGNC Symbol;Acc:HGNC:15480]
ENSG00000139793.18	MBNL2	protein_coding	5554.33	1.03033	6.45816e-07	9.36057e-06	86.1634	muscleblind like splicing regulator 2 [Source:HGNC Symbol;Acc:HGNC:16746]
ENSG00000139832.4	RAB20	protein_coding	342.413	1.5898	1.47149e-09	3.96397e-08	19.6192	RAB20, member RAS oncogene family [Source:HGNC Symbol;Acc:HGNC:18260]
ENSG00000139899.10	CBLN3	protein_coding	162.143	0.782639	0.00628312	0.0253865	4.24883	cerebellin 3 precursor [Source:HGNC Symbol;Acc:HGNC:20146]
ENSG00000139910.19	NOVA1	protein_coding	962.977	-0.602904	0.00270407	0.0127821	6.49951	NOVA alternative splicing regulator 1 [Source:HGNC Symbol;Acc:HGNC:7886]
ENSG00000139974.15	SLC38A6	protein_coding	1384.49	-0.787078	4.40777e-05	0.000384828	21.1651	solute carrier family 38 member 6 [Source:HGNC Symbol;Acc:HGNC:19863]
ENSG00000140105.17	WARS	protein_coding	5930.2	-0.593415	0.000150208	0.00110993	59.0385	tryptophanyl-tRNA synthetase [Source:HGNC Symbol;Acc:HGNC:12729]
ENSG00000140263.13	SORD	protein_coding	1148.82	-1.07763	1.09005e-10	3.78712e-09	13.5416	sorbitol dehydrogenase [Source:HGNC Symbol;Acc:HGNC:11184]
ENSG00000140332.15	TLE3	protein_coding	1369.6	-0.758025	0.00122072	0.00664319	7.45886	transducin like enhancer of split 3 [Source:HGNC Symbol;Acc:HGNC:11839]
ENSG00000140350.15	ANP32A	protein_coding	9592.67	-0.690327	4.60595e-07	6.90466e-06	84.059	acidic nuclear phosphoprotein 32 family member A [Source:HGNC Symbol;Acc:HGNC:13233]
ENSG00000140386.12	SCAPER	protein_coding	1706.03	0.606407	0.000383067	0.00247975	9.92392	S-phase cyclin A associated protein in the ER [Source:HGNC Symbol;Acc:HGNC:13081]
ENSG00000140398.13	NEIL1	protein_coding	601.727	1.41225	1.92975e-12	9.18899e-11	6.26558	nei like DNA glycosylase 1 [Source:HGNC Symbol;Acc:HGNC:18448]
ENSG00000140416.19	TPM1	protein_coding	29032.9	0.846339	3.19556e-07	4.98421e-06	174.034	tropomyosin 1 [Source:HGNC Symbol;Acc:HGNC:12010]
ENSG00000140451.12	PIF1	protein_coding	679.267	-0.865148	7.79638e-05	0.000627664	11.118	PIF1 5'-to-3' DNA helicase [Source:HGNC Symbol;Acc:HGNC:26220]
ENSG00000140479.16	PCSK6	protein_coding	3247.31	0.629288	0.0122299	0.043336	19.6318	proprotein convertase subtilisin/kexin type 6 [Source:HGNC Symbol;Acc:HGNC:8569]
ENSG00000140519.12	RHCG	protein_coding	273.063	1.00286	8.36826e-05	0.00066576	6.94108	Rh family C glycoprotein [Source:HGNC Symbol;Acc:HGNC:18140]
ENSG00000140525.17	FANCI	protein_coding	9778.76	-0.80036	7.79515e-08	1.40695e-06	92.499	Fanconi anemia complementation group I [Source:HGNC Symbol;Acc:HGNC:25568]
ENSG00000140534.13	TICRR	protein_coding	2801.88	-0.801266	2.69961e-08	5.43615e-07	22.8031	TOPBP1 interacting checkpoint and replication regulator [Source:HGNC Symbol;Acc:HGNC:28704]
ENSG00000140545.14	MFGE8	protein_coding	5776.56	0.620703	9.46019e-06	0.000100433	49.8153	milk fat globule-EGF factor 8 protein [Source:HGNC Symbol;Acc:HGNC:7036]
ENSG00000140564.10	FURIN	protein_coding	8660.71	0.91067	6.99433e-11	2.52764e-09	120.513	furin, paired basic amino acid cleaving enzyme [Source:HGNC Symbol;Acc:HGNC:8568]
ENSG00000140848.16	CPNE2	protein_coding	3761.31	0.60071	1.71412e-05	0.000169424	28.01	copine 2 [Source:HGNC Symbol;Acc:HGNC:2315]
ENSG00000140931.19	CMTM3	protein_coding	2923.78	0.825592	1.9173e-09	4.94835e-08	59.7423	CKLF like MARVEL transmembrane domain containing 3 [Source:HGNC Symbol;Acc:HGNC:19174]
ENSG00000140939.14	NOL3	protein_coding	2733.99	1.34684	2.40782e-13	1.38728e-11	77.4418	nucleolar protein 3 [Source:HGNC Symbol;Acc:HGNC:7869]
ENSG00000140950.15	TLDC1	protein_coding	3434.07	0.703612	7.52582e-07	1.07068e-05	25.0612	TBC/LysM-associated domain containing 1 [Source:HGNC Symbol;Acc:HGNC:29325]
ENSG00000140961.12	OSGIN1	protein_coding	1323.72	-0.858923	1.14703e-07	2.00311e-06	26.6268	oxidative stress induced growth inhibitor 1 [Source:HGNC Symbol;Acc:HGNC:30093]
ENSG00000140993.10	TIGD7	protein_coding	545.037	0.733855	0.000252563	0.0017341	8.88125	tigger transposable element derived 7 [Source:HGNC Symbol;Acc:HGNC:18331]
ENSG00000141030.12	COPS3	protein_coding	7299.21	-0.652423	5.20932e-07	7.73042e-06	173.787	COP9 signalosome subunit 3 [Source:HGNC Symbol;Acc:HGNC:2239]
ENSG00000141232.4	TOB1	protein_coding	5318.1	-1.267	1.91329e-22	3.36698e-20	158.621	transducer of ERBB2, 1 [Source:HGNC Symbol;Acc:HGNC:11979]
ENSG00000141279.15	NPEPPS	protein_coding	10957.9	0.622368	3.51078e-05	0.000315951	64.5215	aminopeptidase puromycin sensitive [Source:HGNC Symbol;Acc:HGNC:7900]
ENSG00000141448.8	GATA6	protein_coding	499.827	0.788554	9.24715e-05	0.000728522	8.51686	GATA binding protein 6 [Source:HGNC Symbol;Acc:HGNC:4174]
ENSG00000141449.14	GREB1L	protein_coding	460.096	0.94723	0.00014598	0.00108265	3.24519	growth regulation by estrogen in breast cancer 1 like [Source:HGNC Symbol;Acc:HGNC:31042]
ENSG00000141480.17	ARRB2	protein_coding	3353.77	-1.39563	5.52373e-15	4.06496e-13	60.3404	arrestin beta 2 [Source:HGNC Symbol;Acc:HGNC:712]
ENSG00000141499.16	WRAP53	protein_coding	1865.85	-0.84404	1.82722e-06	2.36548e-05	25.6664	WD repeat containing antisense to TP53 [Source:HGNC Symbol;Acc:HGNC:25522]
ENSG00000141510.16	TP53	protein_coding	7069.79	-0.685532	1.55591e-05	0.000155303	101.645	tumor protein p53 [Source:HGNC Symbol;Acc:HGNC:11998]
ENSG00000141522.11	ARHGDIA	protein_coding	8576.69	-0.614827	1.854e-05	0.000181258	189.941	Rho GDP dissociation inhibitor alpha [Source:HGNC Symbol;Acc:HGNC:678]
ENSG00000141526.14	SLC16A3	protein_coding	12436.8	2.47457	1.66132e-37	7.91081e-35	119.257	solute carrier family 16 member 3 [Source:HGNC Symbol;Acc:HGNC:10924]
ENSG00000141574.7	SECTM1	protein_coding	85.0763	1.32161	0.00039153	0.00252143	2.16606	secreted and transmembrane 1 [Source:HGNC Symbol;Acc:HGNC:10707]
ENSG00000141655.15	TNFRSF11A	protein_coding	1098.29	0.614921	0.00143505	0.00761253	7.14885	TNF receptor superfamily member 11a [Source:HGNC Symbol;Acc:HGNC:11908]
ENSG00000141867.17	BRD4	protein_coding	1953.02	-0.604073	4.28333e-05	0.000376314	10.4382	bromodomain containing 4 [Source:HGNC Symbol;Acc:HGNC:13575]
ENSG00000141905.17	NFIC	protein_coding	2645.59	-0.882162	4.95916e-07	7.38628e-06	19.1746	nuclear factor I C [Source:HGNC Symbol;Acc:HGNC:7786]
ENSG00000141959.16	PFKL	protein_coding	7391.61	1.03481	3.10449e-14	2.04316e-12	59.6091	phosphofructokinase, liver type [Source:HGNC Symbol;Acc:HGNC:8876]
ENSG00000142039.3	CCDC97	protein_coding	2085.12	-0.605313	5.51457e-05	0.000465733	34.3945	coiled-coil domain containing 97 [Source:HGNC Symbol;Acc:HGNC:28289]
ENSG00000142046.14	TMEM91	protein_coding	589.313	0.926671	9.34632e-06	9.94852e-05	13.8179	transmembrane protein 91 [Source:HGNC Symbol;Acc:HGNC:32393]
ENSG00000142156.14	COL6A1	protein_coding	1222.36	0.789316	4.79886e-06	5.59349e-05	15.7255	collagen type VI alpha 1 chain [Source:HGNC Symbol;Acc:HGNC:2211]
ENSG00000142173.14	COL6A2	protein_coding	1011.08	0.638309	0.0010374	0.00577962	13.1851	collagen type VI alpha 2 chain [Source:HGNC Symbol;Acc:HGNC:2212]
ENSG00000142192.20	APP	protein_coding	62088.8	1.21394	9.16799e-18	1.0029e-15	678.621	amyloid beta precursor protein [Source:HGNC Symbol;Acc:HGNC:620]
ENSG00000142207.6	URB1	protein_coding	4563.6	-0.619715	9.19096e-05	0.000724801	26.9972	URB1 ribosome biogenesis 1 homolog (S. cerevisiae) [Source:HGNC Symbol;Acc:HGNC:17344]
ENSG00000142279.12	WTIP	protein_coding	1896.28	1.36136	3.85107e-20	5.4692e-18	9.97508	WT1 interacting protein [Source:HGNC Symbol;Acc:HGNC:20964]
ENSG00000142494.13	SLC47A1	protein_coding	1898.4	-0.934737	4.94203e-09	1.17319e-07	24.4868	solute carrier family 47 member 1 [Source:HGNC Symbol;Acc:HGNC:25588]
ENSG00000142530.10	FAM71E1	protein_coding	158.13	0.960998	0.001165	0.006398	6.92349	family with sequence similarity 71 member E1 [Source:HGNC Symbol;Acc:HGNC:25107]
ENSG00000142687.17	KIAA0319L	protein_coding	5471.24	0.590957	2.11753e-05	0.000202737	34.458	KIAA0319 like [Source:HGNC Symbol;Acc:HGNC:30071]
ENSG00000142694.6	EVA1B	protein_coding	460.624	1.21224	1.24752e-05	0.000128074	29.8436	eva-1 homolog B [Source:HGNC Symbol;Acc:HGNC:25558]
ENSG00000142731.10	PLK4	protein_coding	2008.7	-0.8696	4.72962e-07	7.0704e-06	34.4817	polo like kinase 4 [Source:HGNC Symbol;Acc:HGNC:11397]
ENSG00000142856.16	ITGB3BP	protein_coding	1384.36	-0.916254	3.11718e-06	3.82327e-05	20.3185	integrin subunit beta 3 binding protein [Source:HGNC Symbol;Acc:HGNC:6157]
ENSG00000142864.14	SERBP1	protein_coding	10521.6	-0.735464	7.85848e-07	1.11117e-05	96.1429	SERPINE1 mRNA binding protein 1 [Source:HGNC Symbol;Acc:HGNC:17860]
ENSG00000142892.14	PIGK	protein_coding	3307.46	-0.729491	2.1228e-06	2.70829e-05	43.0257	phosphatidylinositol glycan anchor biosynthesis class K [Source:HGNC Symbol;Acc:HGNC:8965]
ENSG00000142945.12	KIF2C	protein_coding	2890.15	-0.897572	6.11651e-10	1.80705e-08	55.5436	kinesin family member 2C [Source:HGNC Symbol;Acc:HGNC:6393]
ENSG00000143149.12	ALDH9A1	protein_coding	4687.24	-0.630709	6.59763e-06	7.39721e-05	89.9915	aldehyde dehydrogenase 9 family member A1 [Source:HGNC Symbol;Acc:HGNC:412]
ENSG00000143153.12	ATP1B1	protein_coding	54100.7	1.34888	3.46409e-18	3.94955e-16	1342.93	ATPase Na+/K+ transporting subunit beta 1 [Source:HGNC Symbol;Acc:HGNC:804]
ENSG00000143156.13	NME7	protein_coding	1295.6	-0.656305	0.000196264	0.00139181	14.5844	NME/NM23 family member 7 [Source:HGNC Symbol;Acc:HGNC:20461]
ENSG00000143179.12	UCK2	protein_coding	5576.13	-0.611787	9.92863e-06	0.000104651	52.4386	uridine-cytidine kinase 2 [Source:HGNC Symbol;Acc:HGNC:12562]
ENSG00000143228.12	NUF2	protein_coding	2037.28	-1.01516	1.49538e-09	4.01495e-08	47.1789	NUF2, NDC80 kinetochore complex component [Source:HGNC Symbol;Acc:HGNC:14621]
ENSG00000143256.4	PFDN2	protein_coding	745.647	-0.987241	4.48263e-08	8.53809e-07	79.7841	prefoldin subunit 2 [Source:HGNC Symbol;Acc:HGNC:8867]
ENSG00000143314.12	MRPL24	protein_coding	3910.64	-0.774399	6.20573e-09	1.44147e-07	154.532	mitochondrial ribosomal protein L24 [Source:HGNC Symbol;Acc:HGNC:14037]
ENSG00000143315.6	PIGM	protein_coding	1234.56	-0.588318	0.000522865	0.00322852	18.2696	phosphatidylinositol glycan anchor biosynthesis class M [Source:HGNC Symbol;Acc:HGNC:18858]
ENSG00000143320.8	CRABP2	protein_coding	246.127	2.32638	4.04179e-19	5.15248e-17	20.006	cellular retinoic acid binding protein 2 [Source:HGNC Symbol;Acc:HGNC:2339]
ENSG00000143367.15	TUFT1	protein_coding	1902.18	0.936835	1.72976e-07	2.87523e-06	33.5761	tuftelin 1 [Source:HGNC Symbol;Acc:HGNC:12422]
ENSG00000143368.9	SF3B4	protein_coding	2439.73	-0.681458	4.27459e-05	0.000376118	73.3687	splicing factor 3b subunit 4 [Source:HGNC Symbol;Acc:HGNC:10771]
ENSG00000143387.12	CTSK	protein_coding	297.694	0.609187	0.00868111	0.0328535	9.93912	cathepsin K [Source:HGNC Symbol;Acc:HGNC:2536]
ENSG00000143401.14	ANP32E	protein_coding	7225.66	-1.1379	5.50275e-10	1.64981e-08	157.463	acidic nuclear phosphoprotein 32 family member E [Source:HGNC Symbol;Acc:HGNC:16673]
ENSG00000143416.20	SELENBP1	protein_coding	1791.63	-0.782318	0.00319863	0.0146993	41.9993	selenium binding protein 1 [Source:HGNC Symbol;Acc:HGNC:10719]
ENSG00000143476.17	DTL	protein_coding	3927.1	-1.14038	1.65913e-11	6.73216e-10	65.7114	denticleless E3 ubiquitin protein ligase homolog [Source:HGNC Symbol;Acc:HGNC:30288]
ENSG00000143493.12	INTS7	protein_coding	2734.83	-0.653322	2.93006e-05	0.000269685	35.4898	integrator complex subunit 7 [Source:HGNC Symbol;Acc:HGNC:24484]
ENSG00000143494.15	VASH2	protein_coding	324.791	-1.12999	1.67497e-05	0.000165959	4.15162	vasohibin 2 [Source:HGNC Symbol;Acc:HGNC:25723]
ENSG00000143498.17	TAF1A	protein_coding	719.368	-0.658396	0.000647359	0.00387458	17.8564	TATA-box binding protein associated factor, RNA polymerase I subunit A [Source:HGNC Symbol;Acc:HGNC:11532]
ENSG00000143499.13	SMYD2	protein_coding	3260.63	0.810872	1.62373e-08	3.44989e-07	41.0946	SET and MYND domain containing 2 [Source:HGNC Symbol;Acc:HGNC:20982]
ENSG00000143502.14	SUSD4	protein_coding	250.081	1.13857	2.69224e-05	0.00025079	4.46496	sushi domain containing 4 [Source:HGNC Symbol;Acc:HGNC:25470]
ENSG00000143507.17	DUSP10	protein_coding	1367.16	0.624931	0.00101491	0.00568366	29.923	dual specificity phosphatase 10 [Source:HGNC Symbol;Acc:HGNC:3065]
ENSG00000143512.12	HHIPL2	protein_coding	1081.9	-0.724837	0.000700172	0.00413715	22.5338	HHIP like 2 [Source:HGNC Symbol;Acc:HGNC:25842]
ENSG00000143545.8	RAB13	protein_coding	1759.61	-0.621689	0.00012525	0.000953542	42.0238	RAB13, member RAS oncogene family [Source:HGNC Symbol;Acc:HGNC:9762]
ENSG00000143590.13	EFNA3	protein_coding	239.258	2.04033	1.72184e-14	1.19642e-12	10.3458	ephrin A3 [Source:HGNC Symbol;Acc:HGNC:3223]
ENSG00000143633.12	C1orf131	protein_coding	1213.24	-0.774183	1.40529e-06	1.8588e-05	14.9134	chromosome 1 open reading frame 131 [Source:HGNC Symbol;Acc:HGNC:25332]
ENSG00000143742.12	SRP9	protein_coding	7544.26	-0.721761	0.000317189	0.00210895	356.714	signal recognition particle 9 [Source:HGNC Symbol;Acc:HGNC:11304]
ENSG00000143815.14	LBR	protein_coding	5599.68	-0.785849	4.63651e-06	5.44739e-05	79.5904	lamin B receptor [Source:HGNC Symbol;Acc:HGNC:6518]
ENSG00000143816.7	WNT9A	protein_coding	213.114	1.06137	0.000114104	0.000878016	3.7618	Wnt family member 9A [Source:HGNC Symbol;Acc:HGNC:12778]
ENSG00000143845.14	ETNK2	protein_coding	573.403	0.902193	2.96601e-05	0.000272839	8.71896	ethanolamine kinase 2 [Source:HGNC Symbol;Acc:HGNC:25575]
ENSG00000143847.15	PPFIA4	protein_coding	1149.3	4.4136	7.5544e-89	2.03843e-85	11.3209	PTPRF interacting protein alpha 4 [Source:HGNC Symbol;Acc:HGNC:9248]
ENSG00000143878.9	RHOB	protein_coding	6040.28	1.08696	4.80057e-17	4.88813e-15	172.859	ras homolog family member B [Source:HGNC Symbol;Acc:HGNC:668]
ENSG00000143919.14	CAMKMT	protein_coding	371.755	-0.632293	0.00463728	0.0199728	6.08959	calmodulin-lysine N-methyltransferase [Source:HGNC Symbol;Acc:HGNC:26276]
ENSG00000143924.18	EML4	protein_coding	13697.1	-0.841541	2.44235e-07	3.91501e-06	109.483	echinoderm microtubule associated protein like 4 [Source:HGNC Symbol;Acc:HGNC:1316]
ENSG00000143942.4	CHAC2	protein_coding	514.104	-1.312	3.78822e-06	4.53859e-05	36.512	ChaC cation transport regulator homolog 2 [Source:HGNC Symbol;Acc:HGNC:32363]
ENSG00000144026.11	ZNF514	protein_coding	2186.47	0.841808	9.56769e-08	1.70596e-06	19.9336	zinc finger protein 514 [Source:HGNC Symbol;Acc:HGNC:25894]
ENSG00000144034.14	TPRKB	protein_coding	1661.64	-0.87098	3.8109e-06	4.55676e-05	64.3849	TP53RK binding protein [Source:HGNC Symbol;Acc:HGNC:24259]
ENSG00000144182.16	LIPT1	protein_coding	142.967	-0.800757	0.00667638	0.0266693	4.33604	lipoyltransferase 1 [Source:HGNC Symbol;Acc:HGNC:29569]
ENSG00000144320.13	KIAA1715	protein_coding	3423.35	0.972415	4.02188e-09	9.71854e-08	24.8326	lunapark, ER junction formation factor [Source:HGNC Symbol;Acc:HGNC:21610]
ENSG00000144354.13	CDCA7	protein_coding	2322.49	-1.29946	7.79562e-10	2.24575e-08	52.9742	cell division cycle associated 7 [Source:HGNC Symbol;Acc:HGNC:14628]
ENSG00000144369.12	FAM171B	protein_coding	1940.9	-0.660424	6.30434e-05	0.000524228	22.6588	family with sequence similarity 171 member B [Source:HGNC Symbol;Acc:HGNC:29412]
ENSG00000144381.16	HSPD1	protein_coding	34725.7	-0.744959	1.2023e-06	1.6087e-05	603.564	heat shock protein family D (Hsp60) member 1 [Source:HGNC Symbol;Acc:HGNC:5261]
ENSG00000144401.14	METTL21A	protein_coding	719.332	-0.702095	0.00039327	0.00253163	11.5613	methyltransferase like 21A [Source:HGNC Symbol;Acc:HGNC:30476]
ENSG00000144455.13	SUMF1	protein_coding	3517.46	0.825685	2.46197e-08	5.03275e-07	31.748	sulfatase modifying factor 1 [Source:HGNC Symbol;Acc:HGNC:20376]
ENSG00000144468.16	RHBDD1	protein_coding	1248.7	-0.651919	8.34781e-05	0.000665098	12.4439	rhomboid domain containing 1 [Source:HGNC Symbol;Acc:HGNC:23081]
ENSG00000144554.10	FANCD2	protein_coding	4005.28	-1.01758	2.00473e-10	6.5174e-09	37.6539	Fanconi anemia complementation group D2 [Source:HGNC Symbol;Acc:HGNC:3585]
ENSG00000144567.10	FAM134A	protein_coding	4687.14	0.62891	1.61631e-05	0.000160639	49.3365	reticulophagy regulator family member 2 [Source:HGNC Symbol;Acc:HGNC:28450]
ENSG00000144579.7	CTDSP1	protein_coding	4400.72	0.671853	7.80461e-06	8.52609e-05	61.8077	CTD small phosphatase 1 [Source:HGNC Symbol;Acc:HGNC:21614]
ENSG00000144580.13	RQCD1	protein_coding	3364.19	-0.76866	2.60627e-07	4.1531e-06	43.9471	CCR4-NOT transcription complex subunit 9 [Source:HGNC Symbol;Acc:HGNC:10445]
ENSG00000144655.14	CSRNP1	protein_coding	1745.77	0.99461	4.39782e-11	1.65969e-09	35.7164	cysteine and serine rich nuclear protein 1 [Source:HGNC Symbol;Acc:HGNC:14300]
ENSG00000144736.13	SHQ1	protein_coding	1888.13	-0.664475	7.4629e-05	0.000604424	22.124	SHQ1, H/ACA ribonucleoprotein assembly factor [Source:HGNC Symbol;Acc:HGNC:25543]
ENSG00000144815.14	NXPE3	protein_coding	3902.56	-0.7497	2.37048e-08	4.87512e-07	30.3028	neurexophilin and PC-esterase domain family member 3 [Source:HGNC Symbol;Acc:HGNC:28238]
ENSG00000144827.8	ABHD10	protein_coding	2572.83	-0.622444	4.96108e-05	0.000425423	58.9367	abhydrolase domain containing 10 [Source:HGNC Symbol;Acc:HGNC:25656]
ENSG00000144848.10	ATG3	protein_coding	2633.28	-0.605686	1.36734e-05	0.000138792	27.7866	autophagy related 3 [Source:HGNC Symbol;Acc:HGNC:20962]
ENSG00000144909.7	OSBPL11	protein_coding	1601.83	-0.614312	0.000146922	0.00108863	25.9294	oxysterol binding protein like 11 [Source:HGNC Symbol;Acc:HGNC:16397]
ENSG00000144935.14	TRPC1	protein_coding	3222.82	0.842395	7.50796e-07	1.06907e-05	44.1445	transient receptor potential cation channel subfamily C member 1 [Source:HGNC Symbol;Acc:HGNC:12333]
ENSG00000145012.12	LPP	protein_coding	21246.1	0.666248	7.45216e-05	0.000604387	55.9317	LIM domain containing preferred translocation partner in lipoma [Source:HGNC Symbol;Acc:HGNC:6679]
ENSG00000145014.17	TMEM44	protein_coding	1427.37	0.788907	4.07259e-06	4.84461e-05	21.3559	transmembrane protein 44 [Source:HGNC Symbol;Acc:HGNC:25120]
ENSG00000145040.3	UCN2	protein_coding	249.42	2.37778	1.1359e-16	1.09465e-14	15.7416	urocortin 2 [Source:HGNC Symbol;Acc:HGNC:18414]
ENSG00000145041.15	VPRBP	protein_coding	2714.8	-0.650488	6.84291e-06	7.62469e-05	29.0978	DDB1 and CUL4 associated factor 1 [Source:HGNC Symbol;Acc:HGNC:30911]
ENSG00000145050.15	MANF	protein_coding	2569.31	-0.721719	3.0716e-07	4.80941e-06	79.3979	mesencephalic astrocyte derived neurotrophic factor [Source:HGNC Symbol;Acc:HGNC:15461]
ENSG00000145220.13	LYAR	protein_coding	840.253	-0.734516	0.000262982	0.00179725	24.6538	Ly1 antibody reactive [Source:HGNC Symbol;Acc:HGNC:26021]
ENSG00000145386.9	CCNA2	protein_coding	3981.79	-0.961388	6.04008e-09	1.4111e-07	110.796	cyclin A2 [Source:HGNC Symbol;Acc:HGNC:1578]
ENSG00000145414.8	NAF1	protein_coding	743.071	-0.711847	0.000360993	0.0023576	11.0783	nuclear assembly factor 1 ribonucleoprotein [Source:HGNC Symbol;Acc:HGNC:25126]
ENSG00000145494.11	NDUFS6	protein_coding	2124.13	-0.818119	1.27192e-07	2.19068e-06	98.3205	NADH:ubiquinone oxidoreductase subunit S6 [Source:HGNC Symbol;Acc:HGNC:7713]
ENSG00000145555.14	MYO10	protein_coding	19947.1	-0.593098	2.9077e-05	0.000267932	121.675	myosin X [Source:HGNC Symbol;Acc:HGNC:7593]
ENSG00000145623.12	OSMR	protein_coding	11732.9	0.818807	2.01846e-08	4.2385e-07	115.496	oncostatin M receptor [Source:HGNC Symbol;Acc:HGNC:8507]
ENSG00000145685.13	LHFPL2	protein_coding	8564.41	0.616461	0.000459737	0.00289246	69.5097	LHFPL tetraspan subfamily member 2 [Source:HGNC Symbol;Acc:HGNC:6588]
ENSG00000145730.20	PAM	protein_coding	11765.7	1.98801	7.12789e-44	4.80835e-41	114.666	peptidylglycine alpha-amidating monooxygenase [Source:HGNC Symbol;Acc:HGNC:8596]
ENSG00000145779.7	TNFAIP8	protein_coding	3948.91	1.16584	1.20863e-08	2.63716e-07	35.135	TNF alpha induced protein 8 [Source:HGNC Symbol;Acc:HGNC:17260]
ENSG00000145833.15	DDX46	protein_coding	9939.91	-0.797772	1.48618e-09	3.99688e-08	73.7039	DEAD-box helicase 46 [Source:HGNC Symbol;Acc:HGNC:18681]
ENSG00000145882.10	PCYOX1L	protein_coding	653.508	-1.31032	3.75832e-07	5.74573e-06	8.29342	prenylcysteine oxidase 1 like [Source:HGNC Symbol;Acc:HGNC:28477]
ENSG00000145901.14	TNIP1	protein_coding	8048.56	1.08213	4.90345e-11	1.8208e-09	107.187	TNFAIP3 interacting protein 1 [Source:HGNC Symbol;Acc:HGNC:16903]
ENSG00000145911.5	N4BP3	protein_coding	80.4082	0.996121	0.00488126	0.0208296	1.02307	NEDD4 binding protein 3 [Source:HGNC Symbol;Acc:HGNC:29852]
ENSG00000145912.8	NHP2	protein_coding	4398.76	-0.802939	2.1065e-09	5.36231e-08	193.484	NHP2 ribonucleoprotein [Source:HGNC Symbol;Acc:HGNC:14377]
ENSG00000146112.11	PPP1R18	protein_coding	1962.63	0.70215	2.87164e-05	0.000265516	29.4073	protein phosphatase 1 regulatory subunit 18 [Source:HGNC Symbol;Acc:HGNC:29413]
ENSG00000146143.17	PRIM2	protein_coding	1462.18	-0.796365	3.86863e-06	4.61896e-05	23.193	DNA primase subunit 2 [Source:HGNC Symbol;Acc:HGNC:9370]
ENSG00000146205.13	ANO7	protein_coding	131.502	0.842143	0.0057881	0.0237625	1.53906	anoctamin 7 [Source:HGNC Symbol;Acc:HGNC:31677]
ENSG00000146242.8	TPBG	protein_coding	8110.51	1.12642	1.04227e-07	1.85025e-06	99.5437	trophoblast glycoprotein [Source:HGNC Symbol;Acc:HGNC:12004]
ENSG00000146250.6	PRSS35	protein_coding	866.432	0.728205	0.00341783	0.0154996	58.5585	protease, serine 35 [Source:HGNC Symbol;Acc:HGNC:21387]
ENSG00000146263.11	MMS22L	protein_coding	2159.44	-1.00322	6.03546e-08	1.11673e-06	8.111	MMS22 like, DNA repair protein [Source:HGNC Symbol;Acc:HGNC:21475]
ENSG00000146278.10	PNRC1	protein_coding	5802.65	0.61866	9.20631e-06	9.81885e-05	123.683	proline rich nuclear receptor coactivator 1 [Source:HGNC Symbol;Acc:HGNC:17278]
ENSG00000146410.11	MTFR2	protein_coding	458.001	-1.49367	5.02572e-10	1.51239e-08	16.9555	mitochondrial fission regulator 2 [Source:HGNC Symbol;Acc:HGNC:21115]
ENSG00000146540.14	C7orf50	protein_coding	2849.25	-0.635146	1.91648e-05	0.000185795	36.6664	chromosome 7 open reading frame 50 [Source:HGNC Symbol;Acc:HGNC:22421]
ENSG00000146555.18	SDK1	protein_coding	649.824	1.78149	1.56055e-17	1.67319e-15	4.30742	sidekick cell adhesion molecule 1 [Source:HGNC Symbol;Acc:HGNC:19307]
ENSG00000146648.15	EGFR	protein_coding	34775.4	1.79762	4.29065e-20	6.04049e-18	241.846	epidermal growth factor receptor [Source:HGNC Symbol;Acc:HGNC:3236]
ENSG00000146670.9	CDCA5	protein_coding	2629.32	-1.17816	4.59291e-13	2.44603e-11	53.4502	cell division cycle associated 5 [Source:HGNC Symbol;Acc:HGNC:14626]
ENSG00000146674.14	IGFBP3	protein_coding	45776.8	1.6456	5.15179e-05	0.00043945	1216.04	insulin like growth factor binding protein 3 [Source:HGNC Symbol;Acc:HGNC:5472]
ENSG00000146701.11	MDH2	protein_coding	10909.4	-0.586902	1.7499e-05	0.000172605	192.951	malate dehydrogenase 2 [Source:HGNC Symbol;Acc:HGNC:6971]
ENSG00000146731.10	CCT6A	protein_coding	19075.6	-0.876823	1.75066e-09	4.58627e-08	364.831	chaperonin containing TCP1 subunit 6A [Source:HGNC Symbol;Acc:HGNC:1620]
ENSG00000146757.13	ZNF92	protein_coding	1345.21	-0.74906	0.00020201	0.00142943	29.7163	zinc finger protein 92 [Source:HGNC Symbol;Acc:HGNC:13168]
ENSG00000146842.16	TMEM209	protein_coding	2399.34	-0.781964	6.02546e-06	6.84577e-05	36.9291	transmembrane protein 209 [Source:HGNC Symbol;Acc:HGNC:21898]
ENSG00000146858.7	ZC3HAV1L	protein_coding	1035.29	0.933492	5.26977e-08	9.85192e-07	41.774	zinc finger CCCH-type containing, antiviral 1 like [Source:HGNC Symbol;Acc:HGNC:22423]
ENSG00000146859.6	TMEM140	protein_coding	263.939	1.08513	0.00124776	0.0067676	8.49566	transmembrane protein 140 [Source:HGNC Symbol;Acc:HGNC:21870]
ENSG00000146909.7	NOM1	protein_coding	2213.68	-0.691231	2.35232e-06	2.96143e-05	19.0882	nucleolar protein with MIF4G domain 1 [Source:HGNC Symbol;Acc:HGNC:13244]
ENSG00000146918.19	NCAPG2	protein_coding	4521.4	-0.842886	7.67175e-09	1.75184e-07	46.4844	non-SMC condensin II complex subunit G2 [Source:HGNC Symbol;Acc:HGNC:21904]
ENSG00000147003.5	TMEM27	protein_coding	159.822	2.46214	6.8014e-11	2.47449e-09	12.4191	transmembrane protein 27 [Source:HGNC Symbol;Acc:HGNC:29437]
ENSG00000147041.11	SYTL5	protein_coding	920.067	-0.699427	0.000175007	0.00126602	13.6027	synaptotagmin like 5 [Source:HGNC Symbol;Acc:HGNC:15589]
ENSG00000147162.13	OGT	protein_coding	23862.3	0.635161	5.61704e-06	6.4405e-05	145.268	O-linked N-acetylglucosamine (GlcNAc) transferase [Source:HGNC Symbol;Acc:HGNC:8127]
ENSG00000147174.11	ACRC	protein_coding	182.528	0.898868	0.0029484	0.0137458	3.78148	germ cell nuclear acidic peptidase [Source:HGNC Symbol;Acc:HGNC:15805]
ENSG00000147224.10	PRPS1	protein_coding	4353.3	-0.841797	7.52236e-10	2.19436e-08	136.279	phosphoribosyl pyrophosphate synthetase 1 [Source:HGNC Symbol;Acc:HGNC:9462]
ENSG00000147394.18	ZNF185	protein_coding	2020.16	0.962718	2.35959e-07	3.80116e-06	33.8729	zinc finger protein 185 with LIM domain [Source:HGNC Symbol;Acc:HGNC:12976]
ENSG00000147403.16	RPL10	protein_coding	38166	0.594526	1.40461e-05	0.00014204	516.453	ribosomal protein L10 [Source:HGNC Symbol;Acc:HGNC:10298]
ENSG00000147437.9	GNRH1	protein_coding	187.215	0.787	0.00461323	0.0198956	7.70235	gonadotropin releasing hormone 1 [Source:HGNC Symbol;Acc:HGNC:4419]
ENSG00000147535.16	PLPP5	protein_coding	1486.95	-0.610198	0.000819921	0.00472908	22.9196	phospholipid phosphatase 5 [Source:HGNC Symbol;Acc:HGNC:25026]
ENSG00000147536.11	GINS4	protein_coding	2302.08	-0.822533	1.8826e-07	3.09748e-06	30.8888	GINS complex subunit 4 [Source:HGNC Symbol;Acc:HGNC:28226]
ENSG00000147601.13	TERF1	protein_coding	1622.58	-0.612937	0.00030413	0.00203803	12.0752	telomeric repeat binding factor 1 [Source:HGNC Symbol;Acc:HGNC:11728]
ENSG00000147687.16	TATDN1	protein_coding	1539.22	-0.592871	0.000301554	0.00202411	22.1052	TatD DNase domain containing 1 [Source:HGNC Symbol;Acc:HGNC:24220]
ENSG00000147689.16	FAM83A	protein_coding	161.169	-0.912288	0.00172629	0.00885571	1.92282	family with sequence similarity 83 member A [Source:HGNC Symbol;Acc:HGNC:28210]
ENSG00000147852.15	VLDLR	protein_coding	3661.02	1.58971	2.79383e-17	2.93715e-15	34.3977	very low density lipoprotein receptor [Source:HGNC Symbol;Acc:HGNC:12698]
ENSG00000147872.9	PLIN2	protein_coding	9680.08	2.44621	1.75244e-43	1.13488e-40	189.902	perilipin 2 [Source:HGNC Symbol;Acc:HGNC:248]
ENSG00000147955.16	SIGMAR1	protein_coding	4587.16	-0.602032	1.08299e-05	0.000113047	133.463	sigma non-opioid intracellular receptor 1 [Source:HGNC Symbol;Acc:HGNC:8157]
ENSG00000148154.9	UGCG	protein_coding	3580.73	0.955951	6.37304e-09	1.4761e-07	58.2023	UDP-glucose ceramide glucosyltransferase [Source:HGNC Symbol;Acc:HGNC:12524]
ENSG00000148180.17	GSN	protein_coding	10683.2	1.16757	2.11584e-12	9.92913e-11	69.5391	gelsolin [Source:HGNC Symbol;Acc:HGNC:4620]
ENSG00000148219.16	ASTN2	protein_coding	540.602	-0.842791	0.000351703	0.00230343	4.69625	astrotactin 2 [Source:HGNC Symbol;Acc:HGNC:17021]
ENSG00000148229.12	POLE3	protein_coding	4358.52	-0.814574	3.57594e-09	8.75861e-08	115.369	DNA polymerase epsilon 3, accessory subunit [Source:HGNC Symbol;Acc:HGNC:13546]
ENSG00000148335.14	NTMT1	protein_coding	2102.84	-0.785703	3.53565e-07	5.44127e-06	53.8324	N-terminal Xaa-Pro-Lys N-methyltransferase 1 [Source:HGNC Symbol;Acc:HGNC:23373]
ENSG00000148426.12	PROSER2	protein_coding	1077.99	0.685164	0.000247066	0.00170213	18.6767	proline and serine rich 2 [Source:HGNC Symbol;Acc:HGNC:23728]
ENSG00000148459.15	PDSS1	protein_coding	461.502	-0.904049	1.88206e-05	0.000183227	16.6483	decaprenyl diphosphate synthase subunit 1 [Source:HGNC Symbol;Acc:HGNC:17759]
ENSG00000148773.12	MKI67	protein_coding	20479.5	-1.11891	4.63508e-07	6.94191e-06	123.978	marker of proliferation Ki-67 [Source:HGNC Symbol;Acc:HGNC:7107]
ENSG00000148803.11	FUOM	protein_coding	355.772	0.635223	0.00512417	0.0216663	16.662	fucose mutarotase [Source:HGNC Symbol;Acc:HGNC:24733]
ENSG00000148832.14	PAOX	protein_coding	297.82	0.70577	0.00234639	0.0113873	8.15399	polyamine oxidase [Source:HGNC Symbol;Acc:HGNC:20837]
ENSG00000148840.10	PPRC1	protein_coding	3464.09	-0.617278	6.73936e-06	7.51966e-05	37.6927	peroxisome proliferator-activated receptor gamma, coactivator-related 1 [Source:HGNC Symbol;Acc:HGNC:30025]
ENSG00000148843.13	PDCD11	protein_coding	7151.81	-0.8995	7.36784e-12	3.24004e-10	67.187	programmed cell death 11 [Source:HGNC Symbol;Acc:HGNC:13408]
ENSG00000148926.9	ADM	protein_coding	6800.51	2.63729	8.55552e-54	7.29021e-51	229.046	adrenomedullin [Source:HGNC Symbol;Acc:HGNC:259]
ENSG00000148943.11	LIN7C	protein_coding	5256.78	-0.615664	0.00107864	0.00596217	85.3681	lin-7 homolog C, crumbs cell polarity complex component [Source:HGNC Symbol;Acc:HGNC:17789]
ENSG00000148950.9	IMMP1L	protein_coding	547.266	-0.683006	0.00535491	0.0223998	13.7863	inner mitochondrial membrane peptidase subunit 1 [Source:HGNC Symbol;Acc:HGNC:26317]
ENSG00000149136.8	SSRP1	protein_coding	17865.1	-0.742684	5.04661e-09	1.19451e-07	186.748	structure specific recognition protein 1 [Source:HGNC Symbol;Acc:HGNC:11327]
ENSG00000149212.11	SESN3	protein_coding	919.714	-0.935732	1.97466e-06	2.53327e-05	6.22254	sestrin 3 [Source:HGNC Symbol;Acc:HGNC:23060]
ENSG00000149218.4	ENDOD1	protein_coding	1447.44	-0.702859	7.5078e-05	0.000607453	20.049	endonuclease domain containing 1 [Source:HGNC Symbol;Acc:HGNC:29129]
ENSG00000149346.14	SLX4IP	protein_coding	2614.11	-0.797504	8.71256e-08	1.56036e-06	28.778	SLX4 interacting protein [Source:HGNC Symbol;Acc:HGNC:16225]
ENSG00000149428.18	HYOU1	protein_coding	8283.67	-0.775286	1.5203e-09	4.06165e-08	70.7477	hypoxia up-regulated 1 [Source:HGNC Symbol;Acc:HGNC:16931]
ENSG00000149483.11	TMEM138	protein_coding	1872.21	-0.646552	1.33127e-05	0.000135641	19.1511	transmembrane protein 138 [Source:HGNC Symbol;Acc:HGNC:26944]
ENSG00000149503.12	INCENP	protein_coding	4070.34	-0.916053	7.26303e-10	2.12253e-08	66.7685	inner centromere protein [Source:HGNC Symbol;Acc:HGNC:6058]
ENSG00000149554.12	CHEK1	protein_coding	2828.19	-0.785875	7.69432e-07	1.09177e-05	33.8471	checkpoint kinase 1 [Source:HGNC Symbol;Acc:HGNC:1925]
ENSG00000149582.15	TMEM25	protein_coding	83.6178	1.11616	0.00127443	0.00687539	1.09094	transmembrane protein 25 [Source:HGNC Symbol;Acc:HGNC:25890]
ENSG00000149591.16	TAGLN	protein_coding	1187.86	2.37883	6.84975e-45	4.82163e-42	27.213	transgelin [Source:HGNC Symbol;Acc:HGNC:11553]
ENSG00000149596.6	JPH2	protein_coding	406.052	1.17343	3.70537e-07	5.68087e-06	4.89066	junctophilin 2 [Source:HGNC Symbol;Acc:HGNC:14202]
ENSG00000149636.15	DSN1	protein_coding	2395.84	-0.820143	5.39523e-06	6.2303e-05	65.5107	DSN1 homolog, MIS12 kinetochore complex component [Source:HGNC Symbol;Acc:HGNC:16165]
ENSG00000149922.10	TBX6	protein_coding	69.5253	1.3387	0.000575254	0.00349732	2.15828	T-box 6 [Source:HGNC Symbol;Acc:HGNC:11605]
ENSG00000149925.16	ALDOA	protein_coding	87646.4	1.46177	7.66253e-29	2.17643e-26	1070.27	aldolase, fructose-bisphosphate A [Source:HGNC Symbol;Acc:HGNC:414]
ENSG00000149929.15	HIRIP3	protein_coding	630.891	-0.61936	0.00170025	0.00875263	10.8071	HIRA interacting protein 3 [Source:HGNC Symbol;Acc:HGNC:4917]
ENSG00000150551.10	LYPD1	protein_coding	1284.59	1.19225	2.02531e-06	2.59412e-05	50.054	LY6/PLAUR domain containing 1 [Source:HGNC Symbol;Acc:HGNC:28431]
ENSG00000150627.15	WDR17	protein_coding	678.726	-0.901556	7.13935e-05	0.000583768	7.06859	WD repeat domain 17 [Source:HGNC Symbol;Acc:HGNC:16661]
ENSG00000150667.6	FSIP1	protein_coding	163.134	-0.877917	0.00233996	0.0113629	4.00901	fibrous sheath interacting protein 1 [Source:HGNC Symbol;Acc:HGNC:21674]
ENSG00000150753.11	CCT5	protein_coding	29162.2	-0.668996	5.15963e-07	7.6637e-06	339.629	chaperonin containing TCP1 subunit 5 [Source:HGNC Symbol;Acc:HGNC:1618]
ENSG00000150764.13	DIXDC1	protein_coding	2329.24	0.603409	0.0108382	0.0393431	19.7412	DIX domain containing 1 [Source:HGNC Symbol;Acc:HGNC:23695]
ENSG00000150990.7	DHX37	protein_coding	3520.62	-0.594197	0.000205564	0.00145193	36.2947	DEAH-box helicase 37 [Source:HGNC Symbol;Acc:HGNC:17210]
ENSG00000150991.14	UBC	protein_coding	53207.7	0.77781	8.40219e-10	2.39553e-08	860.927	ubiquitin C [Source:HGNC Symbol;Acc:HGNC:12468]
ENSG00000150995.18	ITPR1	protein_coding	2730.84	0.973037	2.10177e-08	4.39634e-07	16.6033	inositol 1,4,5-trisphosphate receptor type 1 [Source:HGNC Symbol;Acc:HGNC:6180]
ENSG00000151006.7	PRSS53	protein_coding	169.319	0.787481	0.0066023	0.0264255	2.04498	protease, serine 53 [Source:HGNC Symbol;Acc:HGNC:34407]
ENSG00000151012.13	SLC7A11	protein_coding	20597.1	-0.86641	1.12385e-07	1.97677e-06	162.067	solute carrier family 7 member 11 [Source:HGNC Symbol;Acc:HGNC:11059]
ENSG00000151117.8	TMEM86A	protein_coding	119.458	1.83533	6.28534e-08	1.15768e-06	2.49533	transmembrane protein 86A [Source:HGNC Symbol;Acc:HGNC:26890]
ENSG00000151233.10	GXYLT1	protein_coding	1607.66	-0.88866	1.27994e-05	0.000131237	16.366	glucoside xylosyltransferase 1 [Source:HGNC Symbol;Acc:HGNC:27482]
ENSG00000151247.12	EIF4E	protein_coding	1893.63	-0.710524	1.7645e-05	0.000173767	9.71166	eukaryotic translation initiation factor 4E [Source:HGNC Symbol;Acc:HGNC:3287]
ENSG00000151503.12	NCAPD3	protein_coding	3321.63	-0.906304	1.87271e-10	6.12509e-09	26.1552	non-SMC condensin II complex subunit D3 [Source:HGNC Symbol;Acc:HGNC:28952]
ENSG00000151552.11	QDPR	protein_coding	618.426	-0.912481	6.54311e-05	0.000542117	15.6799	quinoid dihydropteridine reductase [Source:HGNC Symbol;Acc:HGNC:9752]
ENSG00000151576.10	QTRTD1	protein_coding	3267.45	-0.837767	2.89963e-07	4.56663e-06	30.0561	queuine tRNA-ribosyltransferase accessory subunit 2 [Source:HGNC Symbol;Acc:HGNC:25771]
ENSG00000151617.15	EDNRA	protein_coding	255.456	-1.05813	0.000643644	0.0038552	4.88777	endothelin receptor type A [Source:HGNC Symbol;Acc:HGNC:3179]
ENSG00000151640.12	DPYSL4	protein_coding	1324.09	1.49895	3.11208e-17	3.25062e-15	34.7787	dihydropyrimidinase like 4 [Source:HGNC Symbol;Acc:HGNC:3016]
ENSG00000151715.7	TMEM45B	protein_coding	172.318	1.85145	4.14437e-08	7.98778e-07	5.43313	transmembrane protein 45B [Source:HGNC Symbol;Acc:HGNC:25194]
ENSG00000151725.11	CENPU	protein_coding	1404.01	-0.988608	5.55597e-06	6.38788e-05	38.8302	centromere protein U [Source:HGNC Symbol;Acc:HGNC:21348]
ENSG00000151849.14	CENPJ	protein_coding	1901.23	-0.671528	7.32194e-06	8.0641e-05	25.4789	centromere protein J [Source:HGNC Symbol;Acc:HGNC:17272]
ENSG00000151882.11	CCL28	protein_coding	112.08	1.33279	0.00015839	0.00116191	2.22782	C-C motif chemokine ligand 28 [Source:HGNC Symbol;Acc:HGNC:17700]
ENSG00000151914.18	DST	protein_coding	45414.7	0.88926	2.15506e-13	1.25505e-11	70.0179	dystonin [Source:HGNC Symbol;Acc:HGNC:1090]
ENSG00000151929.9	BAG3	protein_coding	2757.5	-0.63563	2.5044e-05	0.00023546	64.5837	BCL2 associated athanogene 3 [Source:HGNC Symbol;Acc:HGNC:939]
ENSG00000152076.18	CCDC74B	protein_coding	96.6521	-0.92052	0.00671599	0.0268011	1.71799	coiled-coil domain containing 74B [Source:HGNC Symbol;Acc:HGNC:25267]
ENSG00000152133.14	GPATCH11	protein_coding	1001.1	-0.745445	7.77612e-06	8.5007e-05	16.8017	G-patch domain containing 11 [Source:HGNC Symbol;Acc:HGNC:26768]
ENSG00000152137.6	HSPB8	protein_coding	1666.47	1.0325	6.83423e-08	1.24883e-06	41.06	heat shock protein family B (small) member 8 [Source:HGNC Symbol;Acc:HGNC:30171]
ENSG00000152217.16	SETBP1	protein_coding	2109.22	0.772267	0.000210946	0.00148386	12.4528	SET binding protein 1 [Source:HGNC Symbol;Acc:HGNC:15573]
ENSG00000152253.8	SPC25	protein_coding	411.303	-0.983429	4.54972e-05	0.000394959	17.9991	SPC25, NDC80 kinetochore complex component [Source:HGNC Symbol;Acc:HGNC:24031]
ENSG00000152256.13	PDK1	protein_coding	2619.28	2.44226	3.0432e-35	1.23174e-32	17.4113	pyruvate dehydrogenase kinase 1 [Source:HGNC Symbol;Acc:HGNC:8809]
ENSG00000152377.13	SPOCK1	protein_coding	593.383	0.856075	8.04859e-05	0.000646362	6.29373	SPARC/osteonectin, cwcv and kazal like domains proteoglycan 1 [Source:HGNC Symbol;Acc:HGNC:11251]
ENSG00000152422.15	XRCC4	protein_coding	1125.87	-0.613763	0.00163904	0.00848883	30.4973	X-ray repair cross complementing 4 [Source:HGNC Symbol;Acc:HGNC:12831]
ENSG00000152439.12	ZNF773	protein_coding	481.465	0.665013	0.000869311	0.00496268	3.68325	zinc finger protein 773 [Source:HGNC Symbol;Acc:HGNC:30487]
ENSG00000152455.15	SUV39H2	protein_coding	1510.03	-0.782595	0.000193642	0.00137744	32.4796	suppressor of variegation 3-9 homolog 2 [Source:HGNC Symbol;Acc:HGNC:17287]
ENSG00000152475.6	ZNF837	protein_coding	296.704	0.771749	0.00233452	0.0113417	9.63613	zinc finger protein 837 [Source:HGNC Symbol;Acc:HGNC:25164]
ENSG00000152518.6	ZFP36L2	protein_coding	1680.36	-1.08902	1.01746e-07	1.8082e-06	32.4962	ZFP36 ring finger protein like 2 [Source:HGNC Symbol;Acc:HGNC:1108]
ENSG00000152763.16	WDR78	protein_coding	409.359	0.651648	0.00300328	0.0139521	3.69771	WD repeat domain 78 [Source:HGNC Symbol;Acc:HGNC:26252]
ENSG00000152782.16	PANK1	protein_coding	880.388	-0.697489	0.000107982	0.000836071	19.5306	pantothenate kinase 1 [Source:HGNC Symbol;Acc:HGNC:8598]
ENSG00000152818.18	UTRN	protein_coding	10095.2	0.918585	3.10725e-11	1.21513e-09	45.9586	utrophin [Source:HGNC Symbol;Acc:HGNC:12635]
ENSG00000152926.14	ZNF117	protein_coding	394.021	0.796783	0.00101845	0.00570151	2.5969	zinc finger protein 117 [Source:HGNC Symbol;Acc:HGNC:12897]
ENSG00000152952.11	PLOD2	protein_coding	51856.5	2.01641	8.23124e-52	6.66319e-49	523.695	procollagen-lysine,2-oxoglutarate 5-dioxygenase 2 [Source:HGNC Symbol;Acc:HGNC:9082]
ENSG00000153015.15	CWC27	protein_coding	1453.65	-0.653846	3.77805e-05	0.000337378	26.3939	CWC27 spliceosome associated protein homolog [Source:HGNC Symbol;Acc:HGNC:10664]
ENSG00000153044.9	CENPH	protein_coding	1202.52	-1.04833	1.93382e-06	2.48678e-05	45.9221	centromere protein H [Source:HGNC Symbol;Acc:HGNC:17268]
ENSG00000153048.10	CARHSP1	protein_coding	8058.78	1.12236	8.12513e-12	3.50789e-10	102.741	calcium regulated heat stable protein 1 [Source:HGNC Symbol;Acc:HGNC:17150]
ENSG00000153234.13	NR4A2	protein_coding	272.15	-0.963566	0.000816096	0.00471373	5.30328	nuclear receptor subfamily 4 group A member 2 [Source:HGNC Symbol;Acc:HGNC:7981]
ENSG00000153294.11	ADGRF4	protein_coding	662.03	1.27019	9.83988e-10	2.76576e-08	14.5942	adhesion G protein-coupled receptor F4 [Source:HGNC Symbol;Acc:HGNC:19011]
ENSG00000153395.9	LPCAT1	protein_coding	9252	1.14023	1.46286e-10	4.90347e-09	116.227	lysophosphatidylcholine acyltransferase 1 [Source:HGNC Symbol;Acc:HGNC:25718]
ENSG00000153558.13	FBXL2	protein_coding	1519.65	0.645634	0.000696624	0.00411919	12.8451	F-box and leucine rich repeat protein 2 [Source:HGNC Symbol;Acc:HGNC:13598]
ENSG00000153560.11	UBP1	protein_coding	4989.28	-0.636146	4.63158e-06	5.44555e-05	34.5435	upstream binding protein 1 [Source:HGNC Symbol;Acc:HGNC:12507]
ENSG00000153574.8	RPIA	protein_coding	449.843	-1.00374	2.48327e-06	3.11659e-05	18.742	ribose 5-phosphate isomerase A [Source:HGNC Symbol;Acc:HGNC:10297]
ENSG00000153721.17	CNKSR3	protein_coding	1770.59	0.974901	9.94173e-07	1.3652e-05	6.5777	CNKSR family member 3 [Source:HGNC Symbol;Acc:HGNC:23034]
ENSG00000153989.7	NUS1	protein_coding	1014.76	-0.932814	6.47403e-06	7.29906e-05	16.5084	NUS1 dehydrodolichyl diphosphate synthase subunit [Source:HGNC Symbol;Acc:HGNC:21042]
ENSG00000154040.20	CABYR	protein_coding	481.658	-0.743561	0.000268585	0.00183013	9.55604	calcium binding tyrosine phosphorylation regulated [Source:HGNC Symbol;Acc:HGNC:15569]
ENSG00000154102.10	C16orf74	protein_coding	334.098	0.813854	0.000763515	0.00446095	11.1489	chromosome 16 open reading frame 74 [Source:HGNC Symbol;Acc:HGNC:23362]
ENSG00000154127.9	UBASH3B	protein_coding	7731.7	0.741624	0.000191729	0.00136504	60.3247	ubiquitin associated and SH3 domain containing B [Source:HGNC Symbol;Acc:HGNC:29884]
ENSG00000154146.12	NRGN	protein_coding	76.6478	-0.894444	0.0131776	0.0459695	4.33491	neurogranin [Source:HGNC Symbol;Acc:HGNC:8000]
ENSG00000154153.13	FAM134B	protein_coding	873.57	1.03458	4.97737e-08	9.38109e-07	13.0933	reticulophagy regulator 1 [Source:HGNC Symbol;Acc:HGNC:25964]
ENSG00000154222.14	CC2D1B	protein_coding	3401.5	0.655362	3.51344e-05	0.000316015	28.0964	coiled-coil and C2 domain containing 1B [Source:HGNC Symbol;Acc:HGNC:29386]
ENSG00000154263.17	ABCA10	protein_coding	144.685	1.26514	0.000347454	0.00227929	1.60489	ATP binding cassette subfamily A member 10 [Source:HGNC Symbol;Acc:HGNC:30]
ENSG00000154265.15	ABCA5	protein_coding	1930.25	1.03434	9.68447e-11	3.37186e-09	9.63654	ATP binding cassette subfamily A member 5 [Source:HGNC Symbol;Acc:HGNC:35]
ENSG00000154358.19	OBSCN	protein_coding	3169.52	1.04387	4.64638e-10	1.40806e-08	6.4761	obscurin, cytoskeletal calmodulin and titin-interacting RhoGEF [Source:HGNC Symbol;Acc:HGNC:15719]
ENSG00000154640.14	BTG3	protein_coding	791.549	-0.721583	0.00226539	0.0110772	24.5607	BTG anti-proliferation factor 3 [Source:HGNC Symbol;Acc:HGNC:1132]
ENSG00000154642.10	C21orf91	protein_coding	385.303	-0.838812	0.000168054	0.00122338	4.59337	chromosome 21 open reading frame 91 [Source:HGNC Symbol;Acc:HGNC:16459]
ENSG00000154723.12	ATP5J	protein_coding	1561.55	-0.638645	4.32913e-05	0.000379268	48.6857	ATP synthase, H+ transporting, mitochondrial Fo complex subunit F6 [Source:HGNC Symbol;Acc:HGNC:847]
ENSG00000154814.13	OXNAD1	protein_coding	1244.43	-0.63051	0.000103689	0.000807464	13.3742	oxidoreductase NAD binding domain containing 1 [Source:HGNC Symbol;Acc:HGNC:25128]
ENSG00000154839.9	SKA1	protein_coding	1377.51	-1.12079	3.95441e-11	1.49934e-09	36.3111	spindle and kinetochore associated complex subunit 1 [Source:HGNC Symbol;Acc:HGNC:28109]
ENSG00000154898.15	CCDC144CP	transcribed_processed_pseudogene	265.559	0.681916	0.00664123	0.0265485	2.27951	coiled-coil domain containing 144C, pseudogene [Source:HGNC Symbol;Acc:HGNC:29073]
ENSG00000154914.16	USP43	protein_coding	809.806	0.787996	2.08421e-05	0.00020002	9.78273	ubiquitin specific peptidase 43 [Source:HGNC Symbol;Acc:HGNC:20072]
ENSG00000154917.10	RAB6B	protein_coding	586.934	1.51854	1.67033e-12	8.04838e-11	8.44376	RAB6B, member RAS oncogene family [Source:HGNC Symbol;Acc:HGNC:14902]
ENSG00000154920.14	EME1	protein_coding	1335.57	-1.21044	1.27815e-10	4.32011e-09	31.9827	essential meiotic structure-specific endonuclease 1 [Source:HGNC Symbol;Acc:HGNC:24965]
ENSG00000155085.15	AK9	protein_coding	373.396	0.663843	0.00430482	0.0187705	2.31443	adenylate kinase 9 [Source:HGNC Symbol;Acc:HGNC:33814]
ENSG00000155100.10	OTUD6B	protein_coding	1646.56	-0.87931	3.04851e-06	3.75041e-05	32.7627	OTU domain containing 6B [Source:HGNC Symbol;Acc:HGNC:24281]
ENSG00000155111.14	CDK19	protein_coding	2456.86	0.593657	5.11189e-05	0.000436736	19.2469	cyclin dependent kinase 19 [Source:HGNC Symbol;Acc:HGNC:19338]
ENSG00000155265.10	GOLGA7B	protein_coding	263.332	0.731059	0.00372018	0.0166243	2.63786	golgin A7 family member B [Source:HGNC Symbol;Acc:HGNC:31668]
ENSG00000155438.11	NIFK	protein_coding	2674.99	-0.621163	4.98937e-05	0.00042717	75.5837	nucleolar protein interacting with the FHA domain of MKI67 [Source:HGNC Symbol;Acc:HGNC:17838]
ENSG00000155660.10	PDIA4	protein_coding	27741.5	-0.827012	6.56782e-10	1.92632e-08	566.653	protein disulfide isomerase family A member 4 [Source:HGNC Symbol;Acc:HGNC:30167]
ENSG00000155755.18	TMEM237	protein_coding	1424.15	-0.629016	0.00223206	0.0109374	13.4986	transmembrane protein 237 [Source:HGNC Symbol;Acc:HGNC:14432]
ENSG00000155846.16	PPARGC1B	protein_coding	410.226	-1.05522	1.08145e-06	1.46762e-05	2.30924	PPARG coactivator 1 beta [Source:HGNC Symbol;Acc:HGNC:30022]
ENSG00000155876.5	RRAGA	protein_coding	4560.76	0.726495	2.32805e-07	3.75784e-06	173.401	Ras related GTP binding A [Source:HGNC Symbol;Acc:HGNC:16963]
ENSG00000155903.11	RASA2	protein_coding	3179.15	0.712365	1.01793e-05	0.000107015	32.3427	RAS p21 protein activator 2 [Source:HGNC Symbol;Acc:HGNC:9872]
ENSG00000156017.12	CARNMT1	protein_coding	3157.65	-0.655361	0.000141783	0.00105733	50.5826	carnosine N-methyltransferase 1 [Source:HGNC Symbol;Acc:HGNC:23435]
ENSG00000156136.9	DCK	protein_coding	1146.12	-0.948933	7.89236e-07	1.11498e-05	28.4332	deoxycytidine kinase [Source:HGNC Symbol;Acc:HGNC:2704]
ENSG00000156273.15	BACH1	protein_coding	5806.13	1.34934	6.52557e-19	8.00371e-17	60.0446	BTB domain and CNC homolog 1 [Source:HGNC Symbol;Acc:HGNC:935]
ENSG00000156299.12	TIAM1	protein_coding	144.592	-1.33967	9.84657e-06	0.000104001	1.40697	T-cell lymphoma invasion and metastasis 1 [Source:HGNC Symbol;Acc:HGNC:11805]
ENSG00000156304.14	SCAF4	protein_coding	1116.44	-0.625041	0.000187935	0.00134275	12.147	SR-related CTD associated factor 4 [Source:HGNC Symbol;Acc:HGNC:19304]
ENSG00000156381.8	ANKRD9	protein_coding	3203.04	0.922854	4.35589e-08	8.34218e-07	30.1463	ankyrin repeat domain 9 [Source:HGNC Symbol;Acc:HGNC:20096]
ENSG00000156453.13	PCDH1	protein_coding	292.167	1.01722	0.000194831	0.00138408	3.75106	protocadherin 1 [Source:HGNC Symbol;Acc:HGNC:8655]
ENSG00000156469.8	MTERF3	protein_coding	1444.41	-0.703493	7.22881e-06	7.9778e-05	54.0077	mitochondrial transcription termination factor 3 [Source:HGNC Symbol;Acc:HGNC:24258]
ENSG00000156508.17	EEF1A1	protein_coding	276867	0.706713	9.16898e-07	1.27514e-05	2896.26	eukaryotic translation elongation factor 1 alpha 1 [Source:HGNC Symbol;Acc:HGNC:3189]
ENSG00000156509.13	FBXO43	protein_coding	394.167	-0.632803	0.00459703	0.0198409	7.02016	F-box protein 43 [Source:HGNC Symbol;Acc:HGNC:28521]
ENSG00000156515.21	HK1	protein_coding	8540.83	0.814781	1.83581e-05	0.000179892	97.9239	hexokinase 1 [Source:HGNC Symbol;Acc:HGNC:4922]
ENSG00000156531.16	PHF6	protein_coding	5180.57	-0.635505	7.31843e-05	0.000595105	46.419	PHD finger protein 6 [Source:HGNC Symbol;Acc:HGNC:18145]
ENSG00000156535.13	CD109	protein_coding	17659.8	0.899442	3.38721e-13	1.8845e-11	127.286	CD109 molecule [Source:HGNC Symbol;Acc:HGNC:21685]
ENSG00000156697.12	UTP14A	protein_coding	3989.31	-0.785462	4.34134e-08	8.32777e-07	65.4363	UTP14A, small subunit processome component [Source:HGNC Symbol;Acc:HGNC:10665]
ENSG00000156709.13	AIFM1	protein_coding	3790.49	-1.07	1.92345e-15	1.49714e-13	80.9944	apoptosis inducing factor mitochondria associated 1 [Source:HGNC Symbol;Acc:HGNC:8768]
ENSG00000156787.16	TBC1D31	protein_coding	1907.36	-0.656993	4.00872e-05	0.000355428	15.5356	TBC1 domain family member 31 [Source:HGNC Symbol;Acc:HGNC:30888]
ENSG00000156795.6	WDYHV1	protein_coding	1023.49	-0.765067	5.55123e-06	6.38767e-05	33.5956	WDYHV motif containing 1 [Source:HGNC Symbol;Acc:HGNC:25490]
ENSG00000156802.12	ATAD2	protein_coding	7888.68	-0.940466	8.01977e-09	1.81849e-07	83.7576	ATPase family, AAA domain containing 2 [Source:HGNC Symbol;Acc:HGNC:30123]
ENSG00000156804.7	FBXO32	protein_coding	706.269	0.823002	8.41136e-05	0.00066886	6.64635	F-box protein 32 [Source:HGNC Symbol;Acc:HGNC:16731]
ENSG00000156876.9	SASS6	protein_coding	1239.82	-1.10333	2.63202e-08	5.3399e-07	26.4695	SAS-6 centriolar assembly protein [Source:HGNC Symbol;Acc:HGNC:25403]
ENSG00000156970.12	BUB1B	protein_coding	3724.46	-1.04608	2.51653e-13	1.44478e-11	62.191	BUB1 mitotic checkpoint serine/threonine kinase B [Source:HGNC Symbol;Acc:HGNC:1149]
ENSG00000157111.12	TMEM171	protein_coding	92.9869	1.5232	0.000225959	0.0015748	9.01982	transmembrane protein 171 [Source:HGNC Symbol;Acc:HGNC:27031]
ENSG00000157193.14	LRP8	protein_coding	4726.88	-0.804261	1.30748e-05	0.000133469	31.2812	LDL receptor related protein 8 [Source:HGNC Symbol;Acc:HGNC:6700]
ENSG00000157216.15	SSBP3	protein_coding	462.752	-0.615041	0.0068045	0.0270542	5.70449	single stranded DNA binding protein 3 [Source:HGNC Symbol;Acc:HGNC:15674]
ENSG00000157456.7	CCNB2	protein_coding	4040.83	-0.897944	1.13971e-08	2.50365e-07	160.772	cyclin B2 [Source:HGNC Symbol;Acc:HGNC:1580]
ENSG00000157514.16	TSC22D3	protein_coding	1922.11	0.83735	0.00114665	0.0063058	32.2972	TSC22 domain family member 3 [Source:HGNC Symbol;Acc:HGNC:3051]
ENSG00000157827.19	FMNL2	protein_coding	6304.71	0.786578	1.72813e-05	0.000170705	64.1218	formin like 2 [Source:HGNC Symbol;Acc:HGNC:18267]
ENSG00000158055.15	GRHL3	protein_coding	338.408	-1.33297	4.4885e-05	0.000390463	7.98132	grainyhead like transcription factor 3 [Source:HGNC Symbol;Acc:HGNC:25839]
ENSG00000158169.11	FANCC	protein_coding	940.995	-0.953269	2.59204e-08	5.272e-07	10.1328	Fanconi anemia complementation group C [Source:HGNC Symbol;Acc:HGNC:3584]
ENSG00000158292.6	GPR153	protein_coding	313.096	1.67563	1.09312e-12	5.47914e-11	5.7237	G protein-coupled receptor 153 [Source:HGNC Symbol;Acc:HGNC:23618]
ENSG00000158373.8	HIST1H2BD	protein_coding	14181.8	-0.642106	1.21881e-05	0.000125605	1047.1	histone cluster 1 H2B family member d [Source:HGNC Symbol;Acc:HGNC:4747]
ENSG00000158402.18	CDC25C	protein_coding	935.268	-0.782315	1.05521e-05	0.000110504	21.8211	cell division cycle 25C [Source:HGNC Symbol;Acc:HGNC:1727]
ENSG00000158417.10	EIF5B	protein_coding	3614.3	-1.17244	3.66371e-14	2.38215e-12	33.5203	eukaryotic translation initiation factor 5B [Source:HGNC Symbol;Acc:HGNC:30793]
ENSG00000158486.13	DNAH3	protein_coding	226.964	1.19821	8.52932e-05	0.000676578	1.26575	dynein axonemal heavy chain 3 [Source:HGNC Symbol;Acc:HGNC:2949]
ENSG00000158545.15	ZC3H18	protein_coding	2599.27	-0.709896	9.49144e-07	1.31003e-05	20.6316	zinc finger CCCH-type containing 18 [Source:HGNC Symbol;Acc:HGNC:25091]
ENSG00000158710.14	TAGLN2	protein_coding	26476.3	0.749475	8.57215e-07	1.19641e-05	722.294	transgelin 2 [Source:HGNC Symbol;Acc:HGNC:11554]
ENSG00000158715.5	SLC45A3	protein_coding	469.945	0.707852	0.00583677	0.0239113	8.89622	solute carrier family 45 member 3 [Source:HGNC Symbol;Acc:HGNC:8642]
ENSG00000158828.5	PINK1	protein_coding	4750.5	1.25282	1.55198e-07	2.6092e-06	84.4477	PTEN induced putative kinase 1 [Source:HGNC Symbol;Acc:HGNC:14581]
ENSG00000158856.17	DMTN	protein_coding	3956.13	0.679048	3.77603e-05	0.000337378	57.5705	dematin actin binding protein [Source:HGNC Symbol;Acc:HGNC:3382]
ENSG00000159055.3	MIS18A	protein_coding	575.525	-0.837936	0.000126359	0.000959994	25.7874	MIS18 kinetochore protein A [Source:HGNC Symbol;Acc:HGNC:1286]
ENSG00000159131.16	GART	protein_coding	6859.53	-0.778299	7.16211e-09	1.64009e-07	62.0547	phosphoribosylglycinamide formyltransferase, phosphoribosylglycinamide synthetase, phosphoribosylaminoimidazole synthetase [Source:HGNC Symbol;Acc:HGNC:4163]
ENSG00000159167.11	STC1	protein_coding	4987.48	2.3901	3.78176e-27	9.13832e-25	111.249	stanniocalcin 1 [Source:HGNC Symbol;Acc:HGNC:11373]
ENSG00000159199.13	ATP5G1	protein_coding	4509.1	-1.00885	1.3495e-13	8.1221e-12	120.819	ATP synthase, H+ transporting, mitochondrial Fo complex subunit C1 (subunit 9) [Source:HGNC Symbol;Acc:HGNC:841]
ENSG00000159208.15	CIART	protein_coding	53.8487	1.36195	0.00050789	0.00314325	1.8353	circadian associated repressor of transcription [Source:HGNC Symbol;Acc:HGNC:25200]
ENSG00000159231.5	CBR3	protein_coding	201.674	-0.798282	0.00549504	0.0228605	12.2849	carbonyl reductase 3 [Source:HGNC Symbol;Acc:HGNC:1549]
ENSG00000159259.7	CHAF1B	protein_coding	1415.87	-1.42837	1.13297e-16	1.09465e-14	22.1638	chromatin assembly factor 1 subunit B [Source:HGNC Symbol;Acc:HGNC:1911]
ENSG00000159348.12	CYB5R1	protein_coding	1564.2	0.761495	6.59144e-06	7.39539e-05	21.7668	cytochrome b5 reductase 1 [Source:HGNC Symbol;Acc:HGNC:13397]
ENSG00000159388.5	BTG2	protein_coding	1078.98	-1.03497	3.44839e-05	0.000311548	29.3944	BTG anti-proliferation factor 2 [Source:HGNC Symbol;Acc:HGNC:1131]
ENSG00000159399.9	HK2	protein_coding	734.278	2.99878	6.91086e-23	1.24319e-20	13.234	hexokinase 2 [Source:HGNC Symbol;Acc:HGNC:4923]
ENSG00000159403.15	C1R	protein_coding	3129.13	1.48899	1.68734e-09	4.4492e-08	53.7366	complement C1r [Source:HGNC Symbol;Acc:HGNC:1246]
ENSG00000159461.14	AMFR	protein_coding	15252.4	0.802961	7.24859e-11	2.60788e-09	169.392	autocrine motility factor receptor [Source:HGNC Symbol;Acc:HGNC:463]
ENSG00000159840.15	ZYX	protein_coding	2773.96	0.658498	3.5096e-06	4.2435e-05	50.2496	zyxin [Source:HGNC Symbol;Acc:HGNC:13200]
ENSG00000160172.10	FAM86C2P	transcribed_unprocessed_pseudogene	361.962	-0.720681	0.000985442	0.00553585	7.26979	family with sequence similarity 86 member C2, pseudogene [Source:HGNC Symbol;Acc:HGNC:42392]
ENSG00000160179.18	ABCG1	protein_coding	2661.13	1.71465	1.42949e-05	0.000143748	46.6196	ATP binding cassette subfamily G member 1 [Source:HGNC Symbol;Acc:HGNC:73]
ENSG00000160182.2	TFF1	protein_coding	225.973	-0.933938	0.0108372	0.0393431	42.7408	trefoil factor 1 [Source:HGNC Symbol;Acc:HGNC:11755]
ENSG00000160191.17	PDE9A	protein_coding	689.79	1.3023	4.87035e-11	1.81684e-09	10.3804	phosphodiesterase 9A [Source:HGNC Symbol;Acc:HGNC:8795]
ENSG00000160193.11	WDR4	protein_coding	622.752	-0.985315	3.01416e-06	3.71662e-05	16.6775	WD repeat domain 4 [Source:HGNC Symbol;Acc:HGNC:12756]
ENSG00000160209.18	PDXK	protein_coding	37316.5	0.814054	2.809e-11	1.10651e-09	198.813	pyridoxal kinase [Source:HGNC Symbol;Acc:HGNC:8819]
ENSG00000160211.15	G6PD	protein_coding	54988.2	-1.02935	9.55636e-16	7.85368e-14	1039.37	glucose-6-phosphate dehydrogenase [Source:HGNC Symbol;Acc:HGNC:4057]
ENSG00000160233.7	LRRC3	protein_coding	160.387	0.847721	0.00688224	0.0273097	2.22409	leucine rich repeat containing 3 [Source:HGNC Symbol;Acc:HGNC:14965]
ENSG00000160271.14	RALGDS	protein_coding	2230.43	0.957444	1.52226e-08	3.25996e-07	22.6627	ral guanine nucleotide dissociation stimulator [Source:HGNC Symbol;Acc:HGNC:9842]
ENSG00000160310.16	PRMT2	protein_coding	3851.6	0.760149	6.1866e-08	1.14339e-06	29.0544	protein arginine methyltransferase 2 [Source:HGNC Symbol;Acc:HGNC:5186]
ENSG00000160325.14	CACFD1	protein_coding	881.591	0.655431	0.000851542	0.00488362	17.1105	calcium channel flower domain containing 1 [Source:HGNC Symbol;Acc:HGNC:1365]
ENSG00000160352.15	ZNF714	protein_coding	996.958	-0.76492	8.49013e-05	0.000674131	9.42293	zinc finger protein 714 [Source:HGNC Symbol;Acc:HGNC:27124]
ENSG00000160408.14	ST6GALNAC6	protein_coding	2309.49	1.31875	7.92255e-07	1.11827e-05	40.1022	ST6 N-acetylgalactosaminide alpha-2,6-sialyltransferase 6 [Source:HGNC Symbol;Acc:HGNC:23364]
ENSG00000160469.16	BRSK1	protein_coding	427.446	0.867815	4.63492e-05	0.00040171	7.50834	BR serine/threonine kinase 1 [Source:HGNC Symbol;Acc:HGNC:18994]
ENSG00000160633.12	SAFB	protein_coding	2998.8	-0.790196	9.79575e-09	2.16954e-07	28.6909	scaffold attachment factor B [Source:HGNC Symbol;Acc:HGNC:10520]
ENSG00000160691.18	SHC1	protein_coding	10941.6	-0.674931	4.29853e-05	0.000377274	165.256	SHC adaptor protein 1 [Source:HGNC Symbol;Acc:HGNC:10840]
ENSG00000160712.12	IL6R	protein_coding	645.777	-1.00145	2.95512e-07	4.64048e-06	7.49109	interleukin 6 receptor [Source:HGNC Symbol;Acc:HGNC:6019]
ENSG00000160781.15	PAQR6	protein_coding	905.734	1.14187	1.12911e-10	3.89772e-09	30.5497	progestin and adipoQ receptor family member 6 [Source:HGNC Symbol;Acc:HGNC:30132]
ENSG00000160818.16	GPATCH4	protein_coding	1873.58	-1.34641	8.08083e-18	8.8999e-16	32.9252	G-patch domain containing 4 [Source:HGNC Symbol;Acc:HGNC:25982]
ENSG00000160949.16	TONSL	protein_coding	1658.27	-0.666134	7.52403e-05	0.000608462	16.6301	tonsoku like, DNA repair protein [Source:HGNC Symbol;Acc:HGNC:7801]
ENSG00000160957.12	RECQL4	protein_coding	2073.98	-0.823916	5.3272e-07	7.87647e-06	36.5095	RecQ like helicase 4 [Source:HGNC Symbol;Acc:HGNC:9949]
ENSG00000160973.7	FOXH1	protein_coding	51.8997	1.07709	0.00789452	0.0304823	1.68793	forkhead box H1 [Source:HGNC Symbol;Acc:HGNC:3814]
ENSG00000161082.12	CELF5	protein_coding	146.398	1.04551	0.000835832	0.00480258	1.91654	CUGBP Elav-like family member 5 [Source:HGNC Symbol;Acc:HGNC:14058]
ENSG00000161091.12	MFSD12	protein_coding	3470.95	0.784696	1.144e-06	1.54216e-05	42.0569	major facilitator superfamily domain containing 12 [Source:HGNC Symbol;Acc:HGNC:28299]
ENSG00000161328.10	LRRC56	protein_coding	150.194	1.03516	0.0020659	0.0102693	4.22807	leucine rich repeat containing 56 [Source:HGNC Symbol;Acc:HGNC:25430]
ENSG00000161513.11	FDXR	protein_coding	2594.01	-1.3626	3.64515e-14	2.37964e-12	58.0538	ferredoxin reductase [Source:HGNC Symbol;Acc:HGNC:3642]
ENSG00000161638.10	ITGA5	protein_coding	7563.39	1.16745	1.4859e-19	1.98816e-17	68.2876	integrin subunit alpha 5 [Source:HGNC Symbol;Acc:HGNC:6141]
ENSG00000161692.17	DBF4B	protein_coding	1398.08	-0.738139	0.000299017	0.00200958	14.443	DBF4 zinc finger B [Source:HGNC Symbol;Acc:HGNC:17883]
ENSG00000161800.12	RACGAP1	protein_coding	7029.84	-0.686904	4.84707e-07	7.2393e-06	107.005	Rac GTPase activating protein 1 [Source:HGNC Symbol;Acc:HGNC:9804]
ENSG00000161847.13	RAVER1	protein_coding	688.277	-0.670494	0.000240044	0.00166083	9.03874	ribonucleoprotein, PTB binding 1 [Source:HGNC Symbol;Acc:HGNC:30296]
ENSG00000161888.11	SPC24	protein_coding	1646.64	-0.697251	3.86304e-06	4.61569e-05	37.6365	SPC24, NDC80 kinetochore complex component [Source:HGNC Symbol;Acc:HGNC:26913]
ENSG00000161960.14	EIF4A1	protein_coding	7341.3	0.744011	3.68761e-07	5.659e-06	93.8657	eukaryotic translation initiation factor 4A1 [Source:HGNC Symbol;Acc:HGNC:3282]
ENSG00000161980.5	POLR3K	protein_coding	581.183	-1.0213	2.60964e-06	3.25752e-05	22.6711	RNA polymerase III subunit K [Source:HGNC Symbol;Acc:HGNC:14121]
ENSG00000161981.10	SNRNP25	protein_coding	1588.21	-0.793534	1.02226e-06	1.40093e-05	36.5977	small nuclear ribonucleoprotein U11/U12 subunit 25 [Source:HGNC Symbol;Acc:HGNC:14161]
ENSG00000162032.15	SPSB3	protein_coding	1312.29	0.690347	3.10141e-05	0.000283043	24.5741	splA/ryanodine receptor domain and SOCS box containing 3 [Source:HGNC Symbol;Acc:HGNC:30629]
ENSG00000162062.14	C16orf59	protein_coding	820.112	-0.904588	2.14041e-05	0.000204444	21.9268	tubulin epsilon and delta complex 2 [Source:HGNC Symbol;Acc:HGNC:25849]
ENSG00000162063.12	CCNF	protein_coding	2235.85	-0.656448	2.01056e-05	0.000193525	24.2927	cyclin F [Source:HGNC Symbol;Acc:HGNC:1591]
ENSG00000162086.14	ZNF75A	protein_coding	2089.3	0.645842	9.84408e-05	0.000770675	15.5428	zinc finger protein 75a [Source:HGNC Symbol;Acc:HGNC:13146]
ENSG00000162104.9	ADCY9	protein_coding	3350.93	1.03907	3.09733e-06	3.80225e-05	24.9302	adenylate cyclase 9 [Source:HGNC Symbol;Acc:HGNC:240]
ENSG00000162174.12	ASRGL1	protein_coding	748.33	-1.21169	7.36181e-11	2.6369e-09	12.2742	asparaginase like 1 [Source:HGNC Symbol;Acc:HGNC:16448]
ENSG00000162241.12	SLC25A45	protein_coding	836.23	0.655706	0.00353292	0.0159415	7.14771	solute carrier family 25 member 45 [Source:HGNC Symbol;Acc:HGNC:27442]
ENSG00000162377.5	COA7	protein_coding	1621	-0.660636	0.0018192	0.00925025	28.0063	cytochrome c oxidase assembly factor 7 (putative) [Source:HGNC Symbol;Acc:HGNC:25716]
ENSG00000162415.6	ZSWIM5	protein_coding	777.286	1.00779	1.09699e-06	1.48747e-05	8.85415	zinc finger SWIM-type containing 5 [Source:HGNC Symbol;Acc:HGNC:29299]
ENSG00000162433.14	AK4	protein_coding	2972.5	1.77344	2.50332e-25	5.29082e-23	32.2935	adenylate kinase 4 [Source:HGNC Symbol;Acc:HGNC:363]
ENSG00000162458.12	FBLIM1	protein_coding	2728.91	0.761125	1.07096e-06	1.45704e-05	36.1368	filamin binding LIM protein 1 [Source:HGNC Symbol;Acc:HGNC:24686]
ENSG00000162520.14	SYNC	protein_coding	1159.55	1.27306	1.31344e-12	6.44384e-11	23.7943	syncoilin, intermediate filament protein [Source:HGNC Symbol;Acc:HGNC:28897]
ENSG00000162545.5	CAMK2N1	protein_coding	4297.58	1.06234	3.45255e-11	1.32457e-09	110.331	calcium/calmodulin dependent protein kinase II inhibitor 1 [Source:HGNC Symbol;Acc:HGNC:24190]
ENSG00000162591.15	MEGF6	protein_coding	2294.92	2.67481	9.02958e-63	1.04421e-59	30.9492	multiple EGF like domains 6 [Source:HGNC Symbol;Acc:HGNC:3232]
ENSG00000162607.12	USP1	protein_coding	3762.2	-0.739779	8.73137e-06	9.37407e-05	65.449	ubiquitin specific peptidase 1 [Source:HGNC Symbol;Acc:HGNC:12607]
ENSG00000162613.16	FUBP1	protein_coding	9038.89	-0.663106	2.7103e-06	3.37019e-05	106.469	far upstream element binding protein 1 [Source:HGNC Symbol;Acc:HGNC:4004]
ENSG00000162616.8	DNAJB4	protein_coding	1675.25	-0.646687	0.000374824	0.00243223	31.3438	DnaJ heat shock protein family (Hsp40) member B4 [Source:HGNC Symbol;Acc:HGNC:14886]
ENSG00000162623.15	TYW3	protein_coding	1634.76	-0.859534	1.05534e-08	2.32461e-07	24.6535	tRNA-yW synthesizing protein 3 homolog [Source:HGNC Symbol;Acc:HGNC:24757]
ENSG00000162645.12	GBP2	protein_coding	1221.43	2.27767	5.68784e-22	9.5923e-20	18.6737	guanylate binding protein 2 [Source:HGNC Symbol;Acc:HGNC:4183]
ENSG00000162734.12	PEA15	protein_coding	3322.08	1.10149	3.98849e-15	2.97575e-13	81.5171	proliferation and apoptosis adaptor protein 15 [Source:HGNC Symbol;Acc:HGNC:8822]
ENSG00000162769.12	FLVCR1	protein_coding	2501.2	-0.647153	0.000105557	0.000819974	27.6801	feline leukemia virus subgroup C cellular receptor 1 [Source:HGNC Symbol;Acc:HGNC:24682]
ENSG00000162814.10	SPATA17	protein_coding	703.911	0.744816	7.78166e-05	0.000627103	6.68335	spermatogenesis associated 17 [Source:HGNC Symbol;Acc:HGNC:25184]
ENSG00000162851.7	TFB2M	protein_coding	1571.8	-0.817871	5.81414e-08	1.08197e-06	57.2689	transcription factor B2, mitochondrial [Source:HGNC Symbol;Acc:HGNC:18559]
ENSG00000162909.17	CAPN2	protein_coding	31586.4	0.825781	4.1977e-05	0.000370157	262.176	calpain 2 [Source:HGNC Symbol;Acc:HGNC:1479]
ENSG00000162913.9	C1orf145	protein_coding	180.553	1.03062	0.000245352	0.00169248	3.3358	OBSCN antisense RNA 1 [Source:HGNC Symbol;Acc:HGNC:32047]
ENSG00000162975.4	KCNF1	protein_coding	149.328	-1.50659	9.35579e-07	1.29573e-05	5.35555	potassium voltage-gated channel modifier subfamily F member 1 [Source:HGNC Symbol;Acc:HGNC:6246]
ENSG00000163006.11	CCDC138	protein_coding	830.268	-0.771351	0.000446995	0.00282469	11.4342	coiled-coil domain containing 138 [Source:HGNC Symbol;Acc:HGNC:26531]
ENSG00000163040.14	CCDC74A	protein_coding	229.195	-0.697354	0.0072651	0.0284285	5.20185	coiled-coil domain containing 74A [Source:HGNC Symbol;Acc:HGNC:25197]
ENSG00000163053.10	SLC16A14	protein_coding	187.646	-1.46784	6.61597e-06	7.40751e-05	3.48511	solute carrier family 16 member 14 [Source:HGNC Symbol;Acc:HGNC:26417]
ENSG00000163082.9	SGPP2	protein_coding	456.596	0.93084	0.000365485	0.00238405	9.91802	sphingosine-1-phosphate phosphatase 2 [Source:HGNC Symbol;Acc:HGNC:19953]
ENSG00000163110.14	PDLIM5	protein_coding	52368.1	-0.674945	1.82176e-05	0.000179079	328.558	PDZ and LIM domain 5 [Source:HGNC Symbol;Acc:HGNC:17468]
ENSG00000163170.11	BOLA3	protein_coding	1024.82	-0.764266	1.83235e-05	0.000179684	22.6273	bolA family member 3 [Source:HGNC Symbol;Acc:HGNC:24415]
ENSG00000163171.7	CDC42EP3	protein_coding	8100.66	0.77169	2.4764e-09	6.18718e-08	51.7315	CDC42 effector protein 3 [Source:HGNC Symbol;Acc:HGNC:16943]
ENSG00000163249.9	CCNYL1	protein_coding	718.892	-0.717593	0.000290646	0.00195576	10.645	cyclin Y like 1 [Source:HGNC Symbol;Acc:HGNC:26868]
ENSG00000163281.11	GNPDA2	protein_coding	1169.38	-0.71177	1.69382e-05	0.000167622	11.2679	glucosamine-6-phosphate deaminase 2 [Source:HGNC Symbol;Acc:HGNC:21526]
ENSG00000163291.14	PAQR3	protein_coding	941.349	-0.603271	0.00624041	0.0252641	5.60656	progestin and adipoQ receptor family member 3 [Source:HGNC Symbol;Acc:HGNC:30130]
ENSG00000163328.13	GPR155	protein_coding	255.259	1.40329	3.24254e-08	6.44132e-07	2.93941	G protein-coupled receptor 155 [Source:HGNC Symbol;Acc:HGNC:22951]
ENSG00000163344.5	PMVK	protein_coding	785.801	-0.668912	0.00016785	0.00122245	40.9855	phosphomevalonate kinase [Source:HGNC Symbol;Acc:HGNC:9141]
ENSG00000163354.14	DCST2	protein_coding	73.4326	1.24998	0.000577631	0.0035065	1.82327	DC-STAMP domain containing 2 [Source:HGNC Symbol;Acc:HGNC:26562]
ENSG00000163364.9	LINC01116	lincRNA	387.451	1.18179	9.40737e-07	1.30175e-05	15.9369	long intergenic non-protein coding RNA 1116 [Source:HGNC Symbol;Acc:HGNC:49259]
ENSG00000163376.11	KBTBD8	protein_coding	84.7429	-1.3909	0.000244568	0.00168851	1.7407	kelch repeat and BTB domain containing 8 [Source:HGNC Symbol;Acc:HGNC:30691]
ENSG00000163472.18	TMEM79	protein_coding	381.139	-0.620667	0.00373023	0.0166573	8.15693	transmembrane protein 79 [Source:HGNC Symbol;Acc:HGNC:28196]
ENSG00000163507.13	KIAA1524	protein_coding	3486.97	-0.915966	1.6395e-07	2.73927e-06	60.7766	cell proliferation regulating inhibitor of protein phosphatase 2A [Source:HGNC Symbol;Acc:HGNC:29302]
ENSG00000163510.13	CWC22	protein_coding	1810.73	-0.588154	0.000141181	0.00105382	35.9135	CWC22 spliceosome associated protein homolog [Source:HGNC Symbol;Acc:HGNC:29322]
ENSG00000163516.13	ANKZF1	protein_coding	3783.28	1.38618	2.33266e-17	2.46835e-15	43.5486	ankyrin repeat and zinc finger domain containing 1 [Source:HGNC Symbol;Acc:HGNC:25527]
ENSG00000163517.14	HDAC11	protein_coding	889.72	0.804918	8.96435e-06	9.59889e-05	11.6088	histone deacetylase 11 [Source:HGNC Symbol;Acc:HGNC:19086]
ENSG00000163528.12	CHCHD4	protein_coding	1497.54	-0.603205	0.000169373	0.00123132	53.0789	coiled-coil-helix-coiled-coil-helix domain containing 4 [Source:HGNC Symbol;Acc:HGNC:26467]
ENSG00000163535.17	SGOL2	protein_coding	2300.69	-1.31674	2.79451e-11	1.10349e-09	34.1798	shugoshin 2 [Source:HGNC Symbol;Acc:HGNC:30812]
ENSG00000163576.17	EFHB	protein_coding	269.837	0.878754	0.000284511	0.00191846	4.53915	EF-hand domain family member B [Source:HGNC Symbol;Acc:HGNC:26330]
ENSG00000163584.17	RPL22L1	protein_coding	2534.88	-0.817026	2.89536e-05	0.000267099	85.6375	ribosomal protein L22 like 1 [Source:HGNC Symbol;Acc:HGNC:27610]
ENSG00000163659.12	TIPARP	protein_coding	6509.31	1.30678	1.10632e-23	2.158e-21	91.3903	TCDD inducible poly(ADP-ribose) polymerase [Source:HGNC Symbol;Acc:HGNC:23696]
ENSG00000163738.18	MTHFD2L	protein_coding	1174.09	-0.809213	1.13574e-05	0.000117945	9.08469	methylenetetrahydrofolate dehydrogenase (NADP+ dependent) 2 like [Source:HGNC Symbol;Acc:HGNC:31865]
ENSG00000163808.16	KIF15	protein_coding	1830.21	-1.18877	4.30486e-10	1.31056e-08	28.3107	kinesin family member 15 [Source:HGNC Symbol;Acc:HGNC:17273]
ENSG00000163811.11	WDR43	protein_coding	8296.74	-0.705269	6.25404e-08	1.15322e-06	136.047	WD repeat domain 43 [Source:HGNC Symbol;Acc:HGNC:28945]
ENSG00000163872.15	YEATS2	protein_coding	4727.78	0.955581	2.57831e-12	1.20297e-10	30.6081	YEATS domain containing 2 [Source:HGNC Symbol;Acc:HGNC:25489]
ENSG00000163898.9	LIPH	protein_coding	5167.8	0.80332	9.35174e-07	1.29573e-05	82.4168	lipase H [Source:HGNC Symbol;Acc:HGNC:18483]
ENSG00000163918.10	RFC4	protein_coding	2076.46	-0.9889	3.56186e-08	6.97299e-07	52.6568	replication factor C subunit 4 [Source:HGNC Symbol;Acc:HGNC:9972]
ENSG00000163923.9	RPL39L	protein_coding	1064.45	-0.686234	0.000147171	0.00108998	69.7432	ribosomal protein L39 like [Source:HGNC Symbol;Acc:HGNC:17094]
ENSG00000163933.9	RFT1	protein_coding	1636.2	-0.82255	2.92808e-07	4.60696e-06	20.9817	RFT1 homolog [Source:HGNC Symbol;Acc:HGNC:30220]
ENSG00000163938.16	GNL3	protein_coding	5585.13	-0.655317	9.45581e-07	1.30623e-05	110.42	G protein nucleolar 3 [Source:HGNC Symbol;Acc:HGNC:29931]
ENSG00000163975.11	MFI2	protein_coding	3232.69	1.52696	2.29763e-27	5.81228e-25	28.365	melanotransferrin [Source:HGNC Symbol;Acc:HGNC:7037]
ENSG00000163993.6	S100P	protein_coding	728.596	-0.899463	9.09258e-06	9.71646e-05	42.6775	S100 calcium binding protein P [Source:HGNC Symbol;Acc:HGNC:10504]
ENSG00000163995.18	ABLIM2	protein_coding	77.7703	1.10027	0.00301368	0.0139924	1.05309	actin binding LIM protein family member 2 [Source:HGNC Symbol;Acc:HGNC:19195]
ENSG00000164022.16	AIMP1	protein_coding	3219.87	-0.734665	6.03012e-06	6.84626e-05	70.7756	aminoacyl tRNA synthetase complex interacting multifunctional protein 1 [Source:HGNC Symbol;Acc:HGNC:10648]
ENSG00000164032.11	H2AFZ	protein_coding	11520.7	-0.774411	4.50792e-06	5.32336e-05	384.418	H2A histone family member Z [Source:HGNC Symbol;Acc:HGNC:4741]
ENSG00000164045.11	CDC25A	protein_coding	825.303	-1.10429	2.23136e-09	5.65347e-08	15.6942	cell division cycle 25A [Source:HGNC Symbol;Acc:HGNC:1725]
ENSG00000164070.11	HSPA4L	protein_coding	3329.35	-1.01567	3.15325e-10	9.87448e-09	22.383	heat shock protein family A (Hsp70) member 4 like [Source:HGNC Symbol;Acc:HGNC:17041]
ENSG00000164077.13	MON1A	protein_coding	290.512	-0.671905	0.013019	0.0455166	4.46494	MON1 homolog A, secretory trafficking associated [Source:HGNC Symbol;Acc:HGNC:28207]
ENSG00000164087.7	POC1A	protein_coding	841.113	-0.78588	9.45725e-06	0.000100433	26.5874	POC1 centriolar protein A [Source:HGNC Symbol;Acc:HGNC:24488]
ENSG00000164088.17	PPM1M	protein_coding	610.13	0.624809	0.00352129	0.0158979	12.1941	protein phosphatase, Mg2+/Mn2+ dependent 1M [Source:HGNC Symbol;Acc:HGNC:26506]
ENSG00000164096.12	C4orf3	protein_coding	3805.09	1.39275	1.13825e-22	2.02508e-20	89.2471	chromosome 4 open reading frame 3 [Source:HGNC Symbol;Acc:HGNC:19225]
ENSG00000164104.11	HMGB2	protein_coding	3597.37	-0.933145	6.78436e-07	9.77214e-06	94.7759	high mobility group box 2 [Source:HGNC Symbol;Acc:HGNC:5000]
ENSG00000164105.3	SAP30	protein_coding	968.187	0.768795	2.78978e-05	0.000258834	46.8533	Sin3A associated protein 30 [Source:HGNC Symbol;Acc:HGNC:10532]
ENSG00000164109.13	MAD2L1	protein_coding	2940.11	-1.07351	1.08522e-08	2.38718e-07	42.9151	mitotic arrest deficient 2 like 1 [Source:HGNC Symbol;Acc:HGNC:6763]
ENSG00000164134.12	NAA15	protein_coding	7121.89	-0.941511	9.12171e-10	2.57732e-08	56.3101	N(alpha)-acetyltransferase 15, NatA auxiliary subunit [Source:HGNC Symbol;Acc:HGNC:30782]
ENSG00000164142.15	FAM160A1	protein_coding	199.615	2.22986	1.8443e-13	1.08186e-11	3.6772	family with sequence similarity 160 member A1 [Source:HGNC Symbol;Acc:HGNC:34237]
ENSG00000164163.10	ABCE1	protein_coding	8029.28	-0.807648	1.59616e-07	2.67533e-06	95.1871	ATP binding cassette subfamily E member 1 [Source:HGNC Symbol;Acc:HGNC:69]
ENSG00000164182.10	NDUFAF2	protein_coding	655.842	-0.933533	7.14146e-07	1.02138e-05	45.4259	NADH:ubiquinone oxidoreductase complex assembly factor 2 [Source:HGNC Symbol;Acc:HGNC:28086]
ENSG00000164237.8	CMBL	protein_coding	735.976	-1.06467	5.18906e-08	9.71223e-07	16.8777	carboxymethylenebutenolidase homolog [Source:HGNC Symbol;Acc:HGNC:25090]
ENSG00000164306.10	PRIMPOL	protein_coding	710.346	-0.627142	0.0027201	0.0128467	18.1892	primase and DNA directed polymerase [Source:HGNC Symbol;Acc:HGNC:26575]
ENSG00000164338.9	UTP15	protein_coding	2567.69	-0.690317	0.000332537	0.00219656	36.36	UTP15, small subunit processome component [Source:HGNC Symbol;Acc:HGNC:25758]
ENSG00000164442.9	CITED2	protein_coding	2037.5	1.72855	1.87872e-14	1.28884e-12	79.9937	Cbp/p300 interacting transactivator with Glu/Asp rich carboxy-terminal domain 2 [Source:HGNC Symbol;Acc:HGNC:1987]
ENSG00000164463.12	CREBRF	protein_coding	1868.27	1.09733	8.96333e-11	3.13426e-09	10.9699	CREB3 regulatory factor [Source:HGNC Symbol;Acc:HGNC:24050]
ENSG00000164543.5	STK17A	protein_coding	4440.72	1.17339	2.31187e-16	2.13928e-14	60.8294	serine/threonine kinase 17a [Source:HGNC Symbol;Acc:HGNC:11395]
ENSG00000164603.11	C7orf60	protein_coding	1712.46	0.736699	0.000111444	0.000860822	25.365	base methyltransferase of 25S rRNA 2 homolog [Source:HGNC Symbol;Acc:HGNC:26475]
ENSG00000164611.12	PTTG1	protein_coding	3352.62	-0.814227	1.80419e-09	4.71887e-08	113.34	pituitary tumor-transforming 1 [Source:HGNC Symbol;Acc:HGNC:9690]
ENSG00000164638.10	SLC29A4	protein_coding	6566.98	1.44418	4.22588e-13	2.2882e-11	100.223	solute carrier family 29 member 4 [Source:HGNC Symbol;Acc:HGNC:23097]
ENSG00000164684.13	ZNF704	protein_coding	3158.87	0.590396	0.00040071	0.00257236	13.4952	zinc finger protein 704 [Source:HGNC Symbol;Acc:HGNC:32291]
ENSG00000164687.10	FABP5	protein_coding	446.423	-0.81248	8.09684e-05	0.000648813	14.9488	fatty acid binding protein 5 [Source:HGNC Symbol;Acc:HGNC:3560]
ENSG00000164815.10	ORC5	protein_coding	2304.58	-0.681964	1.94458e-05	0.000187817	43.5559	origin recognition complex subunit 5 [Source:HGNC Symbol;Acc:HGNC:8491]
ENSG00000164828.17	SUN1	protein_coding	7976.68	0.603582	8.72915e-05	0.000691076	41.0206	Sad1 and UNC84 domain containing 1 [Source:HGNC Symbol;Acc:HGNC:18587]
ENSG00000164849.8	GPR146	protein_coding	251.984	2.46774	3.68309e-19	4.73248e-17	7.13599	G protein-coupled receptor 146 [Source:HGNC Symbol;Acc:HGNC:21718]
ENSG00000164850.14	GPER1	protein_coding	57.3993	1.62383	5.64739e-05	0.000475957	1.79427	G protein-coupled estrogen receptor 1 [Source:HGNC Symbol;Acc:HGNC:4485]
ENSG00000164855.15	TMEM184A	protein_coding	2539.77	0.641465	5.68034e-05	0.000478485	20.6908	transmembrane protein 184A [Source:HGNC Symbol;Acc:HGNC:28797]
ENSG00000164877.18	MICALL2	protein_coding	952.711	0.95405	4.19601e-07	6.33707e-06	7.01283	MICAL like 2 [Source:HGNC Symbol;Acc:HGNC:29672]
ENSG00000164904.15	ALDH7A1	protein_coding	3098.08	-0.587682	0.00190974	0.00961103	28.4663	aldehyde dehydrogenase 7 family member A1 [Source:HGNC Symbol;Acc:HGNC:877]
ENSG00000164934.13	DCAF13	protein_coding	5103.4	-0.78807	7.40713e-06	8.15237e-05	39.845	DDB1 and CUL4 associated factor 13 [Source:HGNC Symbol;Acc:HGNC:24535]
ENSG00000164941.13	INTS8	protein_coding	5643.78	-0.625962	4.42037e-05	0.000385591	50.6874	integrator complex subunit 8 [Source:HGNC Symbol;Acc:HGNC:26048]
ENSG00000164970.14	FAM219A	protein_coding	1516.92	1.23333	2.13715e-14	1.44772e-12	29.9536	family with sequence similarity 219 member A [Source:HGNC Symbol;Acc:HGNC:19920]
ENSG00000164985.14	PSIP1	protein_coding	8045.22	-0.7051	1.35065e-05	0.000137356	81.0179	PC4 and SFRS1 interacting protein 1 [Source:HGNC Symbol;Acc:HGNC:9527]
ENSG00000165029.15	ABCA1	protein_coding	6407.74	0.82337	1.18446e-06	1.58746e-05	40.0113	ATP binding cassette subfamily A member 1 [Source:HGNC Symbol;Acc:HGNC:29]
ENSG00000165060.11	FXN	protein_coding	407.099	-0.835857	0.000103289	0.000804741	10.2731	frataxin [Source:HGNC Symbol;Acc:HGNC:3951]
ENSG00000165061.14	ZMAT4	protein_coding	565.973	0.629015	0.00878302	0.0331381	11.4266	zinc finger matrin-type 4 [Source:HGNC Symbol;Acc:HGNC:25844]
ENSG00000165097.13	KDM1B	protein_coding	1021.17	-0.665342	0.000823618	0.00474533	16.648	lysine demethylase 1B [Source:HGNC Symbol;Acc:HGNC:21577]
ENSG00000165215.6	CLDN3	protein_coding	268.197	0.723097	0.00919643	0.0344255	14.1666	claudin 3 [Source:HGNC Symbol;Acc:HGNC:2045]
ENSG00000165244.6	ZNF367	protein_coding	1100.66	-0.776001	1.8023e-05	0.000177274	22.1117	zinc finger protein 367 [Source:HGNC Symbol;Acc:HGNC:18320]
ENSG00000165271.16	NOL6	protein_coding	4223.15	-0.725565	2.76486e-06	3.42488e-05	47.722	nucleolar protein 6 [Source:HGNC Symbol;Acc:HGNC:19910]
ENSG00000165304.7	MELK	protein_coding	5222.03	-0.898962	3.04276e-10	9.60279e-09	124.862	maternal embryonic leucine zipper kinase [Source:HGNC Symbol;Acc:HGNC:16870]
ENSG00000165312.6	OTUD1	protein_coding	489.169	0.693281	0.000664446	0.00395534	10.7325	OTU deubiquitinase 1 [Source:HGNC Symbol;Acc:HGNC:27346]
ENSG00000165389.6	SPTSSA	protein_coding	3952.75	-0.817203	0.000361426	0.00235947	108.703	serine palmitoyltransferase small subunit A [Source:HGNC Symbol;Acc:HGNC:20361]
ENSG00000165434.7	PGM2L1	protein_coding	7419.64	1.09267	2.12201e-08	4.42299e-07	59.5996	phosphoglucomutase 2 like 1 [Source:HGNC Symbol;Acc:HGNC:20898]
ENSG00000165480.15	SKA3	protein_coding	1195.85	-1.37785	1.62471e-11	6.6257e-10	33.0536	spindle and kinetochore associated complex subunit 3 [Source:HGNC Symbol;Acc:HGNC:20262]
ENSG00000165490.12	DDIAS	protein_coding	1320.69	-1.51753	1.46125e-15	1.14843e-13	22.3715	DNA damage induced apoptosis suppressor [Source:HGNC Symbol;Acc:HGNC:26351]
ENSG00000165501.16	LRR1	protein_coding	1354.67	-0.928456	9.17562e-07	1.27514e-05	45.3854	leucine rich repeat protein 1 [Source:HGNC Symbol;Acc:HGNC:19742]
ENSG00000165507.8	C10orf10	protein_coding	64.3937	1.23706	0.00148837	0.00784102	1.96501	chromosome 10 open reading frame 10 [Source:HGNC Symbol;Acc:HGNC:23355]
ENSG00000165572.7	KBTBD6	protein_coding	962.703	-0.587694	0.00363073	0.016301	12.8299	kelch repeat and BTB domain containing 6 [Source:HGNC Symbol;Acc:HGNC:25340]
ENSG00000165632.7	TAF3	protein_coding	821.293	-0.723482	2.79876e-05	0.000259518	11.0536	TATA-box binding protein associated factor 3 [Source:HGNC Symbol;Acc:HGNC:17303]
ENSG00000165730.14	STOX1	protein_coding	296.57	-0.88935	0.000147609	0.00109273	6.01636	storkhead box 1 [Source:HGNC Symbol;Acc:HGNC:23508]
ENSG00000165732.12	DDX21	protein_coding	18654.3	-0.689389	1.75872e-07	2.91738e-06	272.762	DExD-box helicase 21 [Source:HGNC Symbol;Acc:HGNC:2744]
ENSG00000165775.17	FUNDC2	protein_coding	4307.14	0.990799	2.69642e-08	5.43615e-07	33.0075	FUN14 domain containing 2 [Source:HGNC Symbol;Acc:HGNC:24925]
ENSG00000165891.15	E2F7	protein_coding	1139.71	-0.91157	4.67954e-08	8.87139e-07	13.2153	E2F transcription factor 7 [Source:HGNC Symbol;Acc:HGNC:23820]
ENSG00000165915.13	SLC39A13	protein_coding	2440.23	1.00478	4.30647e-10	1.31056e-08	35.5117	solute carrier family 39 member 13 [Source:HGNC Symbol;Acc:HGNC:20859]
ENSG00000165916.8	PSMC3	protein_coding	7541.49	-0.634663	3.18693e-06	3.89995e-05	218.277	proteasome 26S subunit, ATPase 3 [Source:HGNC Symbol;Acc:HGNC:9549]
ENSG00000165943.4	MOAP1	protein_coding	1896.75	0.831797	3.87397e-07	5.88916e-06	47.8927	modulator of apoptosis 1 [Source:HGNC Symbol;Acc:HGNC:16658]
ENSG00000166033.11	HTRA1	protein_coding	4794.04	1.08207	9.71987e-12	4.1195e-10	156.212	HtrA serine peptidase 1 [Source:HGNC Symbol;Acc:HGNC:9476]
ENSG00000166046.10	TCP11L2	protein_coding	2926.73	1.41602	3.46986e-19	4.49416e-17	34.333	t-complex 11 like 2 [Source:HGNC Symbol;Acc:HGNC:28627]
ENSG00000166073.8	GPR176	protein_coding	331.819	0.919953	0.00162528	0.00842566	5.35596	G protein-coupled receptor 176 [Source:HGNC Symbol;Acc:HGNC:32370]
ENSG00000166145.14	SPINT1	protein_coding	141.111	0.788165	0.0144576	0.0494965	2.88701	serine peptidase inhibitor, Kunitz type 1 [Source:HGNC Symbol;Acc:HGNC:11246]
ENSG00000166171.12	DPCD	protein_coding	1079.87	0.7392	1.64641e-05	0.00016343	38.3461	deleted in primary ciliary dyskinesia homolog (mouse) [Source:HGNC Symbol;Acc:HGNC:24542]
ENSG00000166173.10	LARP6	protein_coding	2670.26	0.831278	9.85158e-06	0.000104001	33.0856	La ribonucleoprotein domain family member 6 [Source:HGNC Symbol;Acc:HGNC:24012]
ENSG00000166197.16	NOLC1	protein_coding	9533.6	-1.02825	5.16413e-13	2.73226e-11	173.005	nucleolar and coiled-body phosphoprotein 1 [Source:HGNC Symbol;Acc:HGNC:15608]
ENSG00000166261.10	ZNF202	protein_coding	998.801	-0.729885	1.2962e-05	0.000132484	14.2403	zinc finger protein 202 [Source:HGNC Symbol;Acc:HGNC:12994]
ENSG00000166311.9	SMPD1	protein_coding	686.202	0.628152	0.00674921	0.0268806	17.7013	sphingomyelin phosphodiesterase 1 [Source:HGNC Symbol;Acc:HGNC:11120]
ENSG00000166321.13	NUDT13	protein_coding	396.729	1.28738	1.18917e-08	2.5982e-07	12.0745	nudix hydrolase 13 [Source:HGNC Symbol;Acc:HGNC:18827]
ENSG00000166343.9	MSS51	protein_coding	107.072	0.797616	0.0130219	0.0455166	2.99629	MSS51 mitochondrial translational activator [Source:HGNC Symbol;Acc:HGNC:21000]
ENSG00000166411.13	IDH3A	protein_coding	4666.58	-0.744512	3.52152e-08	6.91072e-07	46.9033	isocitrate dehydrogenase 3 (NAD(+)) alpha [Source:HGNC Symbol;Acc:HGNC:5384]
ENSG00000166451.13	CENPN	protein_coding	2855.63	-0.790947	2.15061e-07	3.50286e-06	57.3129	centromere protein N [Source:HGNC Symbol;Acc:HGNC:30873]
ENSG00000166473.16	PKD1L2	polymorphic_pseudogene	1534.56	1.48732	0.000209361	0.00147372	8.80009	polycystin 1 like 2 (gene/pseudogene) [Source:HGNC Symbol;Acc:HGNC:21715]
ENSG00000166477.12	LEO1	protein_coding	4596.35	-0.749601	1.95003e-07	3.20518e-06	117.123	LEO1 homolog, Paf1/RNA polymerase II complex component [Source:HGNC Symbol;Acc:HGNC:30401]
ENSG00000166484.19	MAPK7	protein_coding	1386.29	0.731863	6.29905e-06	7.13158e-05	16.3333	mitogen-activated protein kinase 7 [Source:HGNC Symbol;Acc:HGNC:6880]
ENSG00000166503.8	RP11-382A20.3	protein_coding	5020.68	-0.585716	0.000158897	0.0011651	21.5505	HDGF like 3 [Source:HGNC Symbol;Acc:HGNC:24937]
ENSG00000166508.17	MCM7	protein_coding	14777.3	-0.978817	1.86994e-14	1.28827e-12	245.337	minichromosome maintenance complex component 7 [Source:HGNC Symbol;Acc:HGNC:6950]
ENSG00000166562.8	SEC11C	protein_coding	2017.71	-0.664467	0.000173457	0.00125692	28.9199	SEC11 homolog C, signal peptidase complex subunit [Source:HGNC Symbol;Acc:HGNC:23400]
ENSG00000166669.13	ATF7IP2	protein_coding	791.198	-0.644383	0.00226848	0.011089	8.85064	activating transcription factor 7 interacting protein 2 [Source:HGNC Symbol;Acc:HGNC:20397]
ENSG00000166704.11	ZNF606	protein_coding	975.907	0.847776	6.71261e-06	7.49498e-05	9.1778	zinc finger protein 606 [Source:HGNC Symbol;Acc:HGNC:25879]
ENSG00000166780.10	C16orf45	protein_coding	2621.92	1.02857	1.05251e-07	1.86232e-06	52.1307	chromosome 16 open reading frame 45 [Source:HGNC Symbol;Acc:HGNC:19213]
ENSG00000166803.10	KIAA0101	protein_coding	1132.98	-1.2995	1.15118e-07	2.00562e-06	29.4613	PCNA clamp associated factor [Source:HGNC Symbol;Acc:HGNC:28961]
ENSG00000166823.5	MESP1	protein_coding	207.835	-0.682784	0.00974168	0.0360745	5.96459	mesoderm posterior bHLH transcription factor 1 [Source:HGNC Symbol;Acc:HGNC:29658]
ENSG00000166845.13	C18orf54	protein_coding	438.152	-1.09333	6.11219e-05	0.000510348	6.56797	chromosome 18 open reading frame 54 [Source:HGNC Symbol;Acc:HGNC:13796]
ENSG00000166851.14	PLK1	protein_coding	3679.8	-1.14528	1.56953e-16	1.486e-14	58.7166	polo like kinase 1 [Source:HGNC Symbol;Acc:HGNC:9077]
ENSG00000166881.9	NEMP1	protein_coding	3931.64	-0.634931	0.000260986	0.00178511	50.184	nuclear envelope integral membrane protein 1 [Source:HGNC Symbol;Acc:HGNC:29001]
ENSG00000166886.12	NAB2	protein_coding	1055.17	0.680685	3.27909e-05	0.000297581	21.323	NGFI-A binding protein 2 [Source:HGNC Symbol;Acc:HGNC:7627]
ENSG00000166896.7	XRCC6BP1	protein_coding	368.04	-0.80922	0.00165598	0.00855465	21.2101	ATP23 metallopeptidase and ATP synthase assembly factor homolog [Source:HGNC Symbol;Acc:HGNC:29452]
ENSG00000166920.10	C15orf48	protein_coding	423.873	1.93333	2.45216e-08	5.01902e-07	34.2368	chromosome 15 open reading frame 48 [Source:HGNC Symbol;Acc:HGNC:29898]
ENSG00000166924.8	NYAP1	protein_coding	407.48	1.76484	4.10961e-10	1.25774e-08	10.7028	neuronal tyrosine phosphorylated phosphoinositide-3-kinase adaptor 1 [Source:HGNC Symbol;Acc:HGNC:22009]
ENSG00000166925.8	TSC22D4	protein_coding	1938.56	0.659901	0.000228644	0.0015901	33.4188	TSC22 domain family member 4 [Source:HGNC Symbol;Acc:HGNC:21696]
ENSG00000166974.12	MAPRE2	protein_coding	2857.57	-0.656659	2.98556e-05	0.000274326	29.3873	microtubule associated protein RP/EB family member 2 [Source:HGNC Symbol;Acc:HGNC:6891]
ENSG00000166986.12	MARS	protein_coding	10582	-0.944006	1.4246e-07	2.42017e-06	110.339	methionyl-tRNA synthetase [Source:HGNC Symbol;Acc:HGNC:6898]
ENSG00000167074.14	TEF	protein_coding	525.85	0.701036	0.00174385	0.0089288	8.16539	TEF, PAR bZIP transcription factor [Source:HGNC Symbol;Acc:HGNC:11722]
ENSG00000167088.10	SNRPD1	protein_coding	3613.27	-0.820017	2.01545e-09	5.15485e-08	50.7622	small nuclear ribonucleoprotein D1 polypeptide [Source:HGNC Symbol;Acc:HGNC:11158]
ENSG00000167103.11	PIP5KL1	protein_coding	149.487	1.16429	0.000107646	0.000834353	3.21585	phosphatidylinositol-4-phosphate 5-kinase like 1 [Source:HGNC Symbol;Acc:HGNC:28711]
ENSG00000167123.18	CERCAM	protein_coding	3083.39	0.75901	2.79651e-08	5.61732e-07	32.6472	cerebral endothelial cell adhesion molecule [Source:HGNC Symbol;Acc:HGNC:23723]
ENSG00000167182.12	SP2	protein_coding	399.654	-0.808454	0.000233858	0.00162218	8.72493	Sp2 transcription factor [Source:HGNC Symbol;Acc:HGNC:11207]
ENSG00000167191.11	GPRC5B	protein_coding	2275.49	0.971778	1.92963e-08	4.07309e-07	23.111	G protein-coupled receptor class C group 5 member B [Source:HGNC Symbol;Acc:HGNC:13308]
ENSG00000167196.13	FBXO22	protein_coding	6435.19	-0.698577	2.90101e-05	0.000267468	39.4537	F-box protein 22 [Source:HGNC Symbol;Acc:HGNC:13593]
ENSG00000167306.18	MYO5B	protein_coding	1088.55	0.616615	0.00205376	0.0102214	7.31024	myosin VB [Source:HGNC Symbol;Acc:HGNC:7603]
ENSG00000167325.14	RRM1	protein_coding	11263.4	-0.8088	1.85423e-08	3.91906e-07	189.701	ribonucleotide reductase catalytic subunit M1 [Source:HGNC Symbol;Acc:HGNC:10451]
ENSG00000167397.14	VKORC1	protein_coding	1814.45	0.706123	4.81211e-06	5.60489e-05	52.3498	vitamin K epoxide reductase complex subunit 1 [Source:HGNC Symbol;Acc:HGNC:23663]
ENSG00000167470.12	MIDN	protein_coding	1540.26	-0.719215	4.40163e-05	0.0003847	25.4776	midnolin [Source:HGNC Symbol;Acc:HGNC:16298]
ENSG00000167513.8	CDT1	protein_coding	942.128	-0.890351	6.95465e-05	0.000571262	21.3262	chromatin licensing and DNA replication factor 1 [Source:HGNC Symbol;Acc:HGNC:24576]
ENSG00000167528.12	ZNF641	protein_coding	2620.89	0.809963	1.03093e-05	0.0001081	20.964	zinc finger protein 641 [Source:HGNC Symbol;Acc:HGNC:31834]
ENSG00000167535.7	CACNB3	protein_coding	1787.28	0.953734	3.37557e-10	1.04695e-08	17.4646	calcium voltage-gated channel auxiliary subunit beta 3 [Source:HGNC Symbol;Acc:HGNC:1403]
ENSG00000167536.13	DHRS13	protein_coding	1016.97	1.45531	3.98881e-16	3.47198e-14	24.725	dehydrogenase/reductase 13 [Source:HGNC Symbol;Acc:HGNC:28326]
ENSG00000167552.13	TUBA1A	protein_coding	13511.3	1.05262	1.37721e-11	5.688e-10	301.791	tubulin alpha 1a [Source:HGNC Symbol;Acc:HGNC:20766]
ENSG00000167642.12	SPINT2	protein_coding	27820	0.790283	8.33639e-06	9.00976e-05	356.355	serine peptidase inhibitor, Kunitz type 2 [Source:HGNC Symbol;Acc:HGNC:11247]
ENSG00000167644.11	C19orf33	protein_coding	1109.05	0.808714	1.5431e-06	2.02618e-05	122.964	chromosome 19 open reading frame 33 [Source:HGNC Symbol;Acc:HGNC:16668]
ENSG00000167657.11	DAPK3	protein_coding	2159.1	1.14292	6.37107e-12	2.83373e-10	42.2537	death associated protein kinase 3 [Source:HGNC Symbol;Acc:HGNC:2676]
ENSG00000167670.15	CHAF1A	protein_coding	1928.36	-0.996922	4.54386e-09	1.08663e-07	33.5463	chromatin assembly factor 1 subunit A [Source:HGNC Symbol;Acc:HGNC:1910]
ENSG00000167680.15	SEMA6B	protein_coding	847.636	-0.659464	0.000538184	0.00331049	13.2617	semaphorin 6B [Source:HGNC Symbol;Acc:HGNC:10739]
ENSG00000167693.16	NXN	protein_coding	3034.29	0.835351	8.55954e-07	1.19568e-05	37.9872	nucleoredoxin [Source:HGNC Symbol;Acc:HGNC:18008]
ENSG00000167695.14	FAM57A	protein_coding	2112.75	0.887209	1.25285e-08	2.7263e-07	48.4872	family with sequence similarity 57 member A [Source:HGNC Symbol;Acc:HGNC:29646]
ENSG00000167702.11	KIFC2	protein_coding	3399.6	0.945918	2.36311e-09	5.9408e-08	51.0053	kinesin family member C2 [Source:HGNC Symbol;Acc:HGNC:29530]
ENSG00000167703.14	SLC43A2	protein_coding	385.243	-2.20036	1.56238e-20	2.29954e-18	3.22525	solute carrier family 43 member 2 [Source:HGNC Symbol;Acc:HGNC:23087]
ENSG00000167711.13	SERPINF2	protein_coding	412.367	0.657778	0.00789684	0.030484	11.4798	serpin family F member 2 [Source:HGNC Symbol;Acc:HGNC:9075]
ENSG00000167733.13	HSD11B1L	protein_coding	212.386	0.846471	0.00248259	0.0119354	4.98809	hydroxysteroid 11-beta dehydrogenase 1 like [Source:HGNC Symbol;Acc:HGNC:30419]
ENSG00000167740.9	CYB5D2	protein_coding	2464.04	0.58539	0.000867258	0.00495794	69.0284	cytochrome b5 domain containing 2 [Source:HGNC Symbol;Acc:HGNC:28471]
ENSG00000167767.13	KRT80	protein_coding	4273.29	0.736443	1.50344e-05	0.00015053	70.9343	keratin 80 [Source:HGNC Symbol;Acc:HGNC:27056]
ENSG00000167772.11	ANGPTL4	protein_coding	6547.97	4.29167	3.66921e-80	8.48637e-77	279.265	angiopoietin like 4 [Source:HGNC Symbol;Acc:HGNC:16039]
ENSG00000167779.7	IGFBP6	protein_coding	4468.36	0.680775	7.65795e-07	1.08852e-05	214.063	insulin like growth factor binding protein 6 [Source:HGNC Symbol;Acc:HGNC:5475]
ENSG00000167861.15	HID1	protein_coding	2346.93	0.691981	0.000651096	0.00389407	24.8597	HID1 domain containing [Source:HGNC Symbol;Acc:HGNC:15736]
ENSG00000167881.14	SRP68	protein_coding	3563.98	-0.621604	0.000271134	0.00184517	30.686	signal recognition particle 68 [Source:HGNC Symbol;Acc:HGNC:11302]
ENSG00000167889.12	MGAT5B	protein_coding	2137.88	-0.708992	2.70455e-06	3.36562e-05	23.086	mannosyl (alpha-1,6-)-glycoprotein beta-1,6-N-acetyl-glucosaminyltransferase, isozyme B [Source:HGNC Symbol;Acc:HGNC:24140]
ENSG00000167971.15	CASKIN1	protein_coding	156.033	0.711374	0.0140871	0.0485475	1.66822	CASK interacting protein 1 [Source:HGNC Symbol;Acc:HGNC:20879]
ENSG00000167972.13	ABCA3	protein_coding	5070.09	1.09183	1.08681e-12	5.46444e-11	44.5493	ATP binding cassette subfamily A member 3 [Source:HGNC Symbol;Acc:HGNC:33]
ENSG00000167994.11	RAB3IL1	protein_coding	248.452	-0.942926	0.000166836	0.00121725	6.00143	RAB3A interacting protein like 1 [Source:HGNC Symbol;Acc:HGNC:9780]
ENSG00000167996.15	FTH1	protein_coding	48834.8	-0.837195	4.43887e-12	2.00182e-10	1621.78	ferritin heavy chain 1 [Source:HGNC Symbol;Acc:HGNC:3976]
ENSG00000168002.11	POLR2G	protein_coding	3907.57	-0.616994	3.09822e-05	0.000282911	132.48	RNA polymerase II subunit G [Source:HGNC Symbol;Acc:HGNC:9194]
ENSG00000168066.20	SF1	protein_coding	6381.13	-0.639918	1.87168e-06	2.41336e-05	69.2905	splicing factor 1 [Source:HGNC Symbol;Acc:HGNC:12950]
ENSG00000168078.9	PBK	protein_coding	4445.84	-1.31879	7.56503e-16	6.28092e-14	175.11	PDZ binding kinase [Source:HGNC Symbol;Acc:HGNC:18282]
ENSG00000168079.16	SCARA5	protein_coding	1705.26	-1.23406	1.03396e-09	2.88119e-08	30.4132	scavenger receptor class A member 5 [Source:HGNC Symbol;Acc:HGNC:28701]
ENSG00000168090.9	COPS6	protein_coding	2921.04	-0.645906	2.92361e-05	0.000269245	67.9878	COP9 signalosome subunit 6 [Source:HGNC Symbol;Acc:HGNC:21749]
ENSG00000168116.13	KIAA1586	protein_coding	763.566	-0.665112	0.00369087	0.0165207	18.3658	KIAA1586 [Source:HGNC Symbol;Acc:HGNC:21360]
ENSG00000168209.4	DDIT4	protein_coding	30199.5	1.76738	6.14203e-37	2.76221e-34	1113.17	DNA damage inducible transcript 4 [Source:HGNC Symbol;Acc:HGNC:24944]
ENSG00000168243.10	GNG4	protein_coding	233.881	0.972296	0.00157202	0.00820276	10.8842	G protein subunit gamma 4 [Source:HGNC Symbol;Acc:HGNC:4407]
ENSG00000168275.14	COA6	protein_coding	1225.22	-0.779182	1.84815e-05	0.000180795	71.4187	cytochrome c oxidase assembly factor 6 [Source:HGNC Symbol;Acc:HGNC:18025]
ENSG00000168283.13	BMI1	protein_coding	1465.69	-0.746606	0.000853569	0.00489244	28.1721	BMI1 proto-oncogene, polycomb ring finger [Source:HGNC Symbol;Acc:HGNC:1066]
ENSG00000168298.6	HIST1H1E	protein_coding	16287.3	-0.943626	3.34175e-11	1.28511e-09	1491.87	histone cluster 1 H1 family member e [Source:HGNC Symbol;Acc:HGNC:4718]
ENSG00000168301.12	KCTD6	protein_coding	793.496	-0.883885	3.14799e-05	0.000286165	18.6001	potassium channel tetramerization domain containing 6 [Source:HGNC Symbol;Acc:HGNC:22235]
ENSG00000168350.7	DEGS2	protein_coding	584.975	2.04494	1.40268e-18	1.65762e-16	11.8494	delta 4-desaturase, sphingolipid 2 [Source:HGNC Symbol;Acc:HGNC:20113]
ENSG00000168386.18	FILIP1L	protein_coding	148.984	1.53904	8.9645e-06	9.59889e-05	2.12007	filamin A interacting protein 1 like [Source:HGNC Symbol;Acc:HGNC:24589]
ENSG00000168404.12	MLKL	protein_coding	1832.18	-0.618681	2.3937e-05	0.000225839	20.6341	mixed lineage kinase domain like pseudokinase [Source:HGNC Symbol;Acc:HGNC:26617]
ENSG00000168434.12	COG7	protein_coding	1567.37	-0.591415	0.000186525	0.00133385	22.8279	component of oligomeric golgi complex 7 [Source:HGNC Symbol;Acc:HGNC:18622]
ENSG00000168476.11	REEP4	protein_coding	1529.04	-0.75383	4.75931e-06	5.55539e-05	46.6102	receptor accessory protein 4 [Source:HGNC Symbol;Acc:HGNC:26176]
ENSG00000168487.17	BMP1	protein_coding	5809.4	0.885369	1.22481e-11	5.07154e-10	50.6241	bone morphogenetic protein 1 [Source:HGNC Symbol;Acc:HGNC:1067]
ENSG00000168496.3	FEN1	protein_coding	4610.34	-0.926696	7.46118e-12	3.26477e-10	132.296	flap structure-specific endonuclease 1 [Source:HGNC Symbol;Acc:HGNC:3650]
ENSG00000168528.11	SERINC2	protein_coding	1844.23	0.991206	1.27036e-07	2.19032e-06	36.7278	serine incorporator 2 [Source:HGNC Symbol;Acc:HGNC:23231]
ENSG00000168610.14	STAT3	protein_coding	20153.5	0.60588	5.68916e-05	0.000478978	139.519	signal transducer and activator of transcription 3 [Source:HGNC Symbol;Acc:HGNC:11364]
ENSG00000168615.11	ADAM9	protein_coding	50239.1	0.675693	1.33511e-07	2.28252e-06	470.048	ADAM metallopeptidase domain 9 [Source:HGNC Symbol;Acc:HGNC:216]
ENSG00000168675.18	LDLRAD4	protein_coding	840.159	0.890003	1.28722e-05	0.000131815	3.4595	low density lipoprotein receptor class A domain containing 4 [Source:HGNC Symbol;Acc:HGNC:1224]
ENSG00000168874.12	ATOH8	protein_coding	499.665	0.737642	0.000421752	0.00268826	5.07683	atonal bHLH transcription factor 8 [Source:HGNC Symbol;Acc:HGNC:24126]
ENSG00000168883.19	USP39	protein_coding	4555.38	-0.677708	2.57309e-07	4.10427e-06	75.5548	ubiquitin specific peptidase 39 [Source:HGNC Symbol;Acc:HGNC:20071]
ENSG00000169019.10	COMMD8	protein_coding	799.897	-0.646333	0.00440419	0.0191471	35.7689	COMM domain containing 8 [Source:HGNC Symbol;Acc:HGNC:26036]
ENSG00000169031.18	COL4A3	protein_coding	1798.57	2.37405	7.55173e-31	2.54153e-28	18.2041	collagen type IV alpha 3 chain [Source:HGNC Symbol;Acc:HGNC:2204]
ENSG00000169116.11	PARM1	protein_coding	1077.23	-1.20209	7.68959e-08	1.39256e-06	18.5111	prostate androgen-regulated mucin-like protein 1 [Source:HGNC Symbol;Acc:HGNC:24536]
ENSG00000169129.14	AFAP1L2	protein_coding	3666.57	1.02966	1.04228e-12	5.27327e-11	41.4763	actin filament associated protein 1 like 2 [Source:HGNC Symbol;Acc:HGNC:25901]
ENSG00000169230.9	PRELID1	protein_coding	5294.82	-0.78464	1.03335e-08	2.27929e-07	189.362	PRELI domain containing 1 [Source:HGNC Symbol;Acc:HGNC:30255]
ENSG00000169231.13	THBS3	protein_coding	2279.67	0.936327	2.67339e-08	5.40351e-07	31.8953	thrombospondin 3 [Source:HGNC Symbol;Acc:HGNC:11787]
ENSG00000169239.12	CA5B	protein_coding	2637.46	1.19348	0.00409434	0.0180178	33.433	carbonic anhydrase 5B [Source:HGNC Symbol;Acc:HGNC:1378]
ENSG00000169242.11	EFNA1	protein_coding	1716.39	1.25327	6.54904e-12	2.9049e-10	54.0462	ephrin A1 [Source:HGNC Symbol;Acc:HGNC:3221]
ENSG00000169379.15	ARL13B	protein_coding	1931.17	-0.660149	1.60503e-05	0.000159812	35.214	ADP ribosylation factor like GTPase 13B [Source:HGNC Symbol;Acc:HGNC:25419]
ENSG00000169403.11	PTAFR	protein_coding	212.428	2.29769	7.7476e-13	3.98202e-11	5.02393	platelet activating factor receptor [Source:HGNC Symbol;Acc:HGNC:9582]
ENSG00000169418.9	NPR1	protein_coding	417.085	1.71676	3.3294e-13	1.85872e-11	6.67438	natriuretic peptide receptor 1 [Source:HGNC Symbol;Acc:HGNC:7943]
ENSG00000169439.11	SDC2	protein_coding	71.4461	1.27747	0.000575895	0.0034999	1.20074	syndecan 2 [Source:HGNC Symbol;Acc:HGNC:10659]
ENSG00000169499.14	PLEKHA2	protein_coding	4089.08	1.44709	4.47946e-23	8.24118e-21	49.8651	pleckstrin homology domain containing A2 [Source:HGNC Symbol;Acc:HGNC:14336]
ENSG00000169564.6	PCBP1	protein_coding	4103.96	-0.595874	1.8609e-05	0.000181529	156.681	poly(rC) binding protein 1 [Source:HGNC Symbol;Acc:HGNC:8647]
ENSG00000169583.12	CLIC3	protein_coding	34.3275	1.2121	0.00380385	0.0169467	2.72251	chloride intracellular channel 3 [Source:HGNC Symbol;Acc:HGNC:2064]
ENSG00000169607.12	CKAP2L	protein_coding	1523.57	-0.836404	1.42449e-05	0.000143446	21.7041	cytoskeleton associated protein 2 like [Source:HGNC Symbol;Acc:HGNC:26877]
ENSG00000169660.15	HEXDC	protein_coding	1470.44	0.646719	0.00017062	0.00123871	21.7803	hexosaminidase D [Source:HGNC Symbol;Acc:HGNC:26307]
ENSG00000169679.14	BUB1	protein_coding	3966.28	-0.984831	1.58807e-10	5.27942e-09	50.8364	BUB1 mitotic checkpoint serine/threonine kinase [Source:HGNC Symbol;Acc:HGNC:1148]
ENSG00000169684.13	CHRNA5	protein_coding	1764.23	-1.00801	1.28364e-09	3.4971e-08	37.7369	cholinergic receptor nicotinic alpha 5 subunit [Source:HGNC Symbol;Acc:HGNC:1959]
ENSG00000169740.13	ZNF32	protein_coding	1862.36	0.67517	9.32666e-05	0.000733359	88.847	zinc finger protein 32 [Source:HGNC Symbol;Acc:HGNC:13095]
ENSG00000169891.17	REPS2	protein_coding	823.866	0.983096	1.3836e-07	2.35546e-06	5.04105	RALBP1 associated Eps domain containing 2 [Source:HGNC Symbol;Acc:HGNC:9963]
ENSG00000169902.13	TPST1	protein_coding	1130.79	0.593713	0.000214418	0.00150408	23.6848	tyrosylprotein sulfotransferase 1 [Source:HGNC Symbol;Acc:HGNC:12020]
ENSG00000170089.15	RP11-423H2.1	transcribed_unprocessed_pseudogene	349.261	-0.917507	4.63983e-05	0.00040192	6.67066
ENSG00000170144.18	HNRNPA3	protein_coding	3443.55	-1.19949	2.34804e-10	7.57266e-09	45.3244	heterogeneous nuclear ribonucleoprotein A3 [Source:HGNC Symbol;Acc:HGNC:24941]
ENSG00000170175.10	CHRNB1	protein_coding	363.19	1.09363	2.46876e-06	3.10079e-05	5.89098	cholinergic receptor nicotinic beta 1 subunit [Source:HGNC Symbol;Acc:HGNC:1961]
ENSG00000170312.15	CDK1	protein_coding	6670.18	-0.986238	4.04131e-08	7.81705e-07	136.22	cyclin dependent kinase 1 [Source:HGNC Symbol;Acc:HGNC:1722]
ENSG00000170379.19	TCAF2	protein_coding	104.241	2.24141	1.12972e-09	3.12652e-08	1.85112	TRPM8 channel associated factor 2 [Source:HGNC Symbol;Acc:HGNC:26878]
ENSG00000170382.11	LRRN2	protein_coding	863.133	0.768242	1.17747e-05	0.000121654	10.1945	leucine rich repeat neuronal 2 [Source:HGNC Symbol;Acc:HGNC:16914]
ENSG00000170385.9	SLC30A1	protein_coding	4789.9	-0.876514	6.24374e-08	1.15264e-06	67.4187	solute carrier family 30 member 1 [Source:HGNC Symbol;Acc:HGNC:11012]
ENSG00000170417.14	TMEM182	protein_coding	315.836	-0.739463	0.0120744	0.0429355	4.82765	transmembrane protein 182 [Source:HGNC Symbol;Acc:HGNC:26391]
ENSG00000170439.6	METTL7B	protein_coding	975.438	-0.846696	2.37225e-06	2.9842e-05	44.889	methyltransferase like 7B [Source:HGNC Symbol;Acc:HGNC:28276]
ENSG00000170458.13	CD14	protein_coding	667.51	0.683548	0.00421829	0.0184565	21.9126	CD14 molecule [Source:HGNC Symbol;Acc:HGNC:1628]
ENSG00000170502.12	NUDT9	protein_coding	1303.54	-0.833936	2.8874e-07	4.55181e-06	29.2712	nudix hydrolase 9 [Source:HGNC Symbol;Acc:HGNC:8056]
ENSG00000170515.13	PA2G4	protein_coding	8774.13	-0.867344	1.04475e-11	4.39338e-10	155.49	proliferation-associated 2G4 [Source:HGNC Symbol;Acc:HGNC:8550]
ENSG00000170522.9	ELOVL6	protein_coding	1883.28	-1.22704	6.7698e-17	6.76562e-15	19.0447	ELOVL fatty acid elongase 6 [Source:HGNC Symbol;Acc:HGNC:15829]
ENSG00000170523.3	KRT83	protein_coding	423.614	-0.8551	0.000189284	0.00135161	17.1303	keratin 83 [Source:HGNC Symbol;Acc:HGNC:6460]
ENSG00000170525.18	PFKFB3	protein_coding	46532.2	1.38325	2.32484e-28	6.2732e-26	631.447	6-phosphofructo-2-kinase/fructose-2,6-biphosphatase 3 [Source:HGNC Symbol;Acc:HGNC:8874]
ENSG00000170606.13	HSPA4	protein_coding	24268.6	-0.609522	1.41538e-05	0.000142772	320.649	heat shock protein family A (Hsp70) member 4 [Source:HGNC Symbol;Acc:HGNC:5237]
ENSG00000170629.14	DPY19L2P2	transcribed_unprocessed_pseudogene	509.643	1.19285	5.93662e-08	1.10222e-06	6.68663	DPY19L2 pseudogene 2 [Source:HGNC Symbol;Acc:HGNC:21764]
ENSG00000170647.3	TMEM133	protein_coding	360.637	0.606486	0.00905944	0.0340149	11.4419	transmembrane protein 133 [Source:HGNC Symbol;Acc:HGNC:24033]
ENSG00000170775.2	GPR37	protein_coding	989.932	-0.723935	0.000244763	0.00168913	23.2795	G protein-coupled receptor 37 [Source:HGNC Symbol;Acc:HGNC:4494]
ENSG00000170855.3	TRIAP1	protein_coding	2029.16	-0.654596	9.97576e-06	0.000105011	93.5883	TP53 regulated inhibitor of apoptosis 1 [Source:HGNC Symbol;Acc:HGNC:26937]
ENSG00000170860.3	LSM3	protein_coding	2755.02	-0.835099	1.65189e-09	4.37016e-08	49.2664	LSM3 homolog, U6 small nuclear RNA and mRNA degradation associated [Source:HGNC Symbol;Acc:HGNC:17874]
ENSG00000170876.7	TMEM43	protein_coding	6056.67	0.594451	5.63256e-06	6.45373e-05	103.218	transmembrane protein 43 [Source:HGNC Symbol;Acc:HGNC:28472]
ENSG00000170899.10	GSTA4	protein_coding	758.085	-0.69789	0.000596687	0.00360461	22.5895	glutathione S-transferase alpha 4 [Source:HGNC Symbol;Acc:HGNC:4629]
ENSG00000170915.8	PAQR8	protein_coding	580.302	1.06416	3.12338e-05	0.000284406	9.1296	progestin and adipoQ receptor family member 8 [Source:HGNC Symbol;Acc:HGNC:15708]
ENSG00000170921.14	TANC2	protein_coding	8988.44	0.895472	1.17312e-08	2.57008e-07	29.0312	tetratricopeptide repeat, ankyrin repeat and coiled-coil containing 2 [Source:HGNC Symbol;Acc:HGNC:30212]
ENSG00000170949.17	ZNF160	protein_coding	3078.02	0.960517	1.65197e-09	4.37016e-08	23.4027	zinc finger protein 160 [Source:HGNC Symbol;Acc:HGNC:12948]
ENSG00000171045.14	TSNARE1	protein_coding	695.486	0.594163	0.00216887	0.0106762	10.3556	t-SNARE domain containing 1 [Source:HGNC Symbol;Acc:HGNC:26437]
ENSG00000171055.14	FEZ2	protein_coding	5887.57	0.654857	5.80299e-05	0.000487548	41.1182	fasciculation and elongation protein zeta 2 [Source:HGNC Symbol;Acc:HGNC:3660]
ENSG00000171105.13	INSR	protein_coding	2453.22	0.708623	3.79229e-05	0.000338463	16.6066	insulin receptor [Source:HGNC Symbol;Acc:HGNC:6091]
ENSG00000171174.13	RBKS	protein_coding	517.442	0.635482	0.00255822	0.0122248	9.71386	ribokinase [Source:HGNC Symbol;Acc:HGNC:30325]
ENSG00000171223.5	JUNB	protein_coding	5059.62	1.00115	5.24737e-13	2.76288e-11	198.255	JunB proto-oncogene, AP-1 transcription factor subunit [Source:HGNC Symbol;Acc:HGNC:6205]
ENSG00000171227.6	TMEM37	protein_coding	2388.07	1.93976	3.40896e-23	6.49306e-21	80.3072	transmembrane protein 37 [Source:HGNC Symbol;Acc:HGNC:18216]
ENSG00000171241.8	SHCBP1	protein_coding	3251.92	-1.15571	3.33063e-11	1.28388e-09	59.4147	SHC binding and spindle associated 1 [Source:HGNC Symbol;Acc:HGNC:29547]
ENSG00000171246.5	NPTX1	protein_coding	856.069	-0.77034	0.00706952	0.0278426	12.0114	neuronal pentraxin 1 [Source:HGNC Symbol;Acc:HGNC:7952]
ENSG00000171262.11	FAM98B	protein_coding	747.012	-1.19388	3.5667e-07	5.48384e-06	8.81392	family with sequence similarity 98 member B [Source:HGNC Symbol;Acc:HGNC:26773]
ENSG00000171314.8	PGAM1	protein_coding	5593.61	1.18432	5.23458e-19	6.5696e-17	147.774	phosphoglycerate mutase 1 [Source:HGNC Symbol;Acc:HGNC:8888]
ENSG00000171320.14	ESCO2	protein_coding	2990.59	-1.29296	1.98306e-12	9.41518e-11	32.886	establishment of sister chromatid cohesion N-acetyltransferase 2 [Source:HGNC Symbol;Acc:HGNC:27230]
ENSG00000171346.13	KRT15	protein_coding	244.894	-1.03382	0.00362606	0.0162873	3.42946	keratin 15 [Source:HGNC Symbol;Acc:HGNC:6421]
ENSG00000171425.9	ZNF581	protein_coding	1358.49	0.9056	1.3412e-07	2.29051e-06	56.7055	zinc finger protein 581 [Source:HGNC Symbol;Acc:HGNC:25017]
ENSG00000171435.13	KSR2	protein_coding	476.231	1.18536	1.28875e-06	1.71589e-05	2.03308	kinase suppressor of ras 2 [Source:HGNC Symbol;Acc:HGNC:18610]
ENSG00000171462.14	DLK2	protein_coding	151.033	0.995228	0.000586779	0.00355537	4.65755	delta like non-canonical Notch ligand 2 [Source:HGNC Symbol;Acc:HGNC:21113]
ENSG00000171497.4	PPID	protein_coding	2542.49	-0.831479	2.06662e-07	3.37965e-06	73.7373	peptidylprolyl isomerase D [Source:HGNC Symbol;Acc:HGNC:9257]
ENSG00000171503.11	ETFDH	protein_coding	964.272	-0.601833	0.00028929	0.00194825	13.6183	electron transfer flavoprotein dehydrogenase [Source:HGNC Symbol;Acc:HGNC:3483]
ENSG00000171522.5	PTGER4	protein_coding	139.973	-1.11747	0.00025466	0.00174701	2.94622	prostaglandin E receptor 4 [Source:HGNC Symbol;Acc:HGNC:9596]
ENSG00000171606.17	ZNF274	protein_coding	1879.98	0.585785	0.000325149	0.00215391	13.1455	zinc finger protein 274 [Source:HGNC Symbol;Acc:HGNC:13068]
ENSG00000171680.20	PLEKHG5	protein_coding	393.601	0.810379	0.000155052	0.00114	3.85272	pleckstrin homology and RhoGEF domain containing G5 [Source:HGNC Symbol;Acc:HGNC:29105]
ENSG00000171681.12	ATF7IP	protein_coding	4134.83	-0.805259	1.06574e-06	1.45361e-05	22.3441	activating transcription factor 7 interacting protein [Source:HGNC Symbol;Acc:HGNC:20092]
ENSG00000171763.17	SPATA5L1	protein_coding	625.157	-0.639956	0.00128848	0.00694194	12.8879	spermatogenesis associated 5 like 1 [Source:HGNC Symbol;Acc:HGNC:28762]
ENSG00000171791.12	BCL2	protein_coding	149.502	-1.01989	0.00421875	0.0184565	1.04198	BCL2, apoptosis regulator [Source:HGNC Symbol;Acc:HGNC:990]
ENSG00000171798.17	KNDC1	protein_coding	298.13	0.812933	0.00069041	0.00408842	2.34879	kinase non-catalytic C-lobe domain containing 1 [Source:HGNC Symbol;Acc:HGNC:29374]
ENSG00000171848.13	RRM2	protein_coding	3803.95	-0.950331	8.65199e-05	0.000685638	56.3416	ribonucleotide reductase regulatory subunit M2 [Source:HGNC Symbol;Acc:HGNC:10452]
ENSG00000171903.16	CYP4F11	protein_coding	796.159	-1.09585	3.54975e-09	8.70763e-08	14.5514	cytochrome P450 family 4 subfamily F member 11 [Source:HGNC Symbol;Acc:HGNC:13265]
ENSG00000171960.10	PPIH	protein_coding	1062.71	-1.12782	1.49211e-11	6.12319e-10	53.7237	peptidylprolyl isomerase H [Source:HGNC Symbol;Acc:HGNC:14651]
ENSG00000171970.12	ZNF57	protein_coding	293.036	-0.704884	0.0064665	0.0260041	10.0995	zinc finger protein 57 [Source:HGNC Symbol;Acc:HGNC:13125]
ENSG00000171984.14	C20orf196	protein_coding	409.7	-0.842321	8.29092e-05	0.000661557	16.6584	chromosome 20 open reading frame 196 [Source:HGNC Symbol;Acc:HGNC:26318]
ENSG00000172006.11	ZNF554	protein_coding	274.761	0.843765	0.000835928	0.00480258	3.94398	zinc finger protein 554 [Source:HGNC Symbol;Acc:HGNC:26629]
ENSG00000172037.13	LAMB2	protein_coding	14850.1	1.27625	8.09016e-19	9.7746e-17	166.693	laminin subunit beta 2 [Source:HGNC Symbol;Acc:HGNC:6487]
ENSG00000172059.10	KLF11	protein_coding	665.027	0.696364	0.000355683	0.00232761	9.72453	Kruppel like factor 11 [Source:HGNC Symbol;Acc:HGNC:11811]
ENSG00000172115.8	CYCS	protein_coding	6233.16	-0.933409	1.6722e-07	2.78814e-06	113.934	cytochrome c, somatic [Source:HGNC Symbol;Acc:HGNC:19986]
ENSG00000172159.15	FRMD3	protein_coding	2411.03	0.792429	2.67858e-05	0.000249661	25.1031	FERM domain containing 3 [Source:HGNC Symbol;Acc:HGNC:24125]
ENSG00000172167.7	MTBP	protein_coding	1010.14	-0.942616	6.88345e-06	7.65932e-05	10.0365	MDM2 binding protein [Source:HGNC Symbol;Acc:HGNC:7417]
ENSG00000172175.12	MALT1	protein_coding	10050.1	0.734361	0.000129217	0.00097763	63.5364	MALT1 paracaspase [Source:HGNC Symbol;Acc:HGNC:6819]
ENSG00000172201.10	ID4	protein_coding	163.76	-1.37612	3.21569e-06	3.93217e-05	5.86934	inhibitor of DNA binding 4, HLH protein [Source:HGNC Symbol;Acc:HGNC:5363]
ENSG00000172216.5	CEBPB	protein_coding	2480.44	-0.784711	3.75677e-06	4.50868e-05	86.456	CCAAT/enhancer binding protein beta [Source:HGNC Symbol;Acc:HGNC:1834]
ENSG00000172244.8	C5orf34	protein_coding	629.782	-1.05237	4.67363e-06	5.48703e-05	17.441	chromosome 5 open reading frame 34 [Source:HGNC Symbol;Acc:HGNC:24738]
ENSG00000172264.16	MACROD2	protein_coding	206.301	0.899208	0.000639931	0.00383721	1.18826	MACRO domain containing 2 [Source:HGNC Symbol;Acc:HGNC:16126]
ENSG00000172336.4	POP7	protein_coding	1408.44	-0.791719	4.6246e-06	5.4413e-05	98.8826	POP7 homolog, ribonuclease P/MRP subunit [Source:HGNC Symbol;Acc:HGNC:19949]
ENSG00000172382.9	PRSS27	protein_coding	251.147	1.0767	4.16744e-05	0.00036809	2.97453	protease, serine 27 [Source:HGNC Symbol;Acc:HGNC:15475]
ENSG00000172426.15	RSPH9	protein_coding	75.4964	1.35359	0.000369692	0.00240664	2.59252	radial spoke head 9 homolog [Source:HGNC Symbol;Acc:HGNC:21057]
ENSG00000172469.14	MANEA	protein_coding	995.506	-0.685085	0.00565965	0.0233571	14.8408	mannosidase endo-alpha [Source:HGNC Symbol;Acc:HGNC:21072]
ENSG00000172534.13	HCFC1	protein_coding	6208.36	-0.596448	0.000116709	0.00089678	47.1705	host cell factor C1 [Source:HGNC Symbol;Acc:HGNC:4839]
ENSG00000172575.11	RASGRP1	protein_coding	371.57	1.51656	6.08284e-11	2.22305e-09	4.51116	RAS guanyl releasing protein 1 [Source:HGNC Symbol;Acc:HGNC:9878]
ENSG00000172638.12	EFEMP2	protein_coding	189.452	1.5921	1.2577e-08	2.73046e-07	2.65435	EGF containing fibulin like extracellular matrix protein 2 [Source:HGNC Symbol;Acc:HGNC:3219]
ENSG00000173041.11	ZNF680	protein_coding	904.8	-0.715358	0.000308623	0.00206131	12.2187	zinc finger protein 680 [Source:HGNC Symbol;Acc:HGNC:26897]
ENSG00000173083.14	HPSE	protein_coding	94.8249	-1.28298	0.000893138	0.00508435	1.87096	heparanase [Source:HGNC Symbol;Acc:HGNC:5164]
ENSG00000173156.6	RHOD	protein_coding	785.758	0.641337	0.000327793	0.00217054	36.5067	ras homolog family member D [Source:HGNC Symbol;Acc:HGNC:670]
ENSG00000173175.14	ADCY5	protein_coding	275.489	-0.883251	0.00726778	0.0284285	2.72179	adenylate cyclase 5 [Source:HGNC Symbol;Acc:HGNC:236]
ENSG00000173207.12	CKS1B	protein_coding	2243.1	-0.869131	1.34888e-09	3.65191e-08	64.614	CDC28 protein kinase regulatory subunit 1B [Source:HGNC Symbol;Acc:HGNC:19083]
ENSG00000173210.19	ABLIM3	protein_coding	349.142	0.746014	0.00110312	0.00608503	3.34357	actin binding LIM protein family member 3 [Source:HGNC Symbol;Acc:HGNC:29132]
ENSG00000173227.13	SYT12	protein_coding	1031.02	1.95058	1.04151e-15	8.43103e-14	8.91143	synaptotagmin 12 [Source:HGNC Symbol;Acc:HGNC:18381]
ENSG00000173262.11	SLC2A14	protein_coding	190.815	2.05568	1.31024e-07	2.24236e-06	4.90429	solute carrier family 2 member 14 [Source:HGNC Symbol;Acc:HGNC:18301]
ENSG00000173281.4	PPP1R3B	protein_coding	3374.04	1.14691	5.3203e-14	3.40457e-12	43.909	protein phosphatase 1 regulatory subunit 3B [Source:HGNC Symbol;Acc:HGNC:14942]
ENSG00000173409.13	ARV1	protein_coding	1354.27	-0.68613	2.89485e-05	0.000267099	44.2104	ARV1 homolog, fatty acid homeostasis modulator [Source:HGNC Symbol;Acc:HGNC:29561]
ENSG00000173418.11	NAA20	protein_coding	3559.57	-0.588431	5.48e-05	0.000463296	93.6361	N(alpha)-acetyltransferase 20, NatB catalytic subunit [Source:HGNC Symbol;Acc:HGNC:15908]
ENSG00000173456.4	RNF26	protein_coding	1236.63	-0.935639	8.824e-06	9.46724e-05	31.7505	ring finger protein 26 [Source:HGNC Symbol;Acc:HGNC:14646]
ENSG00000173531.15	MST1	protein_coding	256.29	0.614646	0.014337	0.049198	3.11437	macrophage stimulating 1 [Source:HGNC Symbol;Acc:HGNC:7380]
ENSG00000173535.13	TNFRSF10C	protein_coding	425.012	0.688148	0.00232918	0.0113241	9.88959	TNF receptor superfamily member 10c [Source:HGNC Symbol;Acc:HGNC:11906]
ENSG00000173548.8	SNX33	protein_coding	5390.94	1.01919	5.84081e-12	2.61947e-10	49.2419	sorting nexin 33 [Source:HGNC Symbol;Acc:HGNC:28468]
ENSG00000173588.14	CEP83	protein_coding	1245.79	-0.960568	6.63709e-08	1.21693e-06	13.9921	centrosomal protein 83 [Source:HGNC Symbol;Acc:HGNC:17966]
ENSG00000173599.13	PC	protein_coding	3999.94	1.06628	6.45269e-07	9.36057e-06	52.8347	pyruvate carboxylase [Source:HGNC Symbol;Acc:HGNC:8636]
ENSG00000173621.8	LRFN4	protein_coding	2950.02	1.0895	3.43591e-09	8.45402e-08	76.2635	leucine rich repeat and fibronectin type III domain containing 4 [Source:HGNC Symbol;Acc:HGNC:28456]
ENSG00000173674.10	EIF1AX	protein_coding	3908.91	-0.641266	0.000694579	0.0041086	64.9592	eukaryotic translation initiation factor 1A, X-linked [Source:HGNC Symbol;Acc:HGNC:3250]
ENSG00000173706.12	HEG1	protein_coding	2294.73	1.31839	3.19127e-12	1.4678e-10	16.1858	heart development protein with EGF like domains 1 [Source:HGNC Symbol;Acc:HGNC:29227]
ENSG00000173715.15	C11orf80	protein_coding	1040.7	1.01685	2.05453e-09	5.23823e-08	18.8369	chromosome 11 open reading frame 80 [Source:HGNC Symbol;Acc:HGNC:26197]
ENSG00000173727.11	CMB9-22P13.1	lincRNA	870.767	1.84876	1.29998e-10	4.37561e-09	60.1885
ENSG00000173757.9	STAT5B	protein_coding	5590.23	0.871714	7.2e-10	2.10792e-08	54.2184	signal transducer and activator of transcription 5B [Source:HGNC Symbol;Acc:HGNC:11367]
ENSG00000173890.16	GPR160	protein_coding	444.49	1.01876	1.29318e-05	0.000132258	7.24081	G protein-coupled receptor 160 [Source:HGNC Symbol;Acc:HGNC:23693]
ENSG00000173926.5	2003-03-01	protein_coding	129.641	1.13141	0.00037571	0.00243602	2.04726	membrane associated ring-CH-type finger 3 [Source:HGNC Symbol;Acc:HGNC:28728]
ENSG00000174013.7	FBXO45	protein_coding	1120.52	-0.596491	0.00221526	0.0108649	13.6876	F-box protein 45 [Source:HGNC Symbol;Acc:HGNC:29148]
ENSG00000174080.10	CTSF	protein_coding	4521.03	0.981366	1.54013e-12	7.46547e-11	107.834	cathepsin F [Source:HGNC Symbol;Acc:HGNC:2531]
ENSG00000174177.12	CTU2	protein_coding	712.462	-1.10121	6.26331e-09	1.45276e-07	15.1108	cytosolic thiouridylase subunit 2 [Source:HGNC Symbol;Acc:HGNC:28005]
ENSG00000174206.12	C12orf66	protein_coding	1610.13	-0.608566	8.27942e-05	0.000660966	17.963	chromosome 12 open reading frame 66 [Source:HGNC Symbol;Acc:HGNC:26517]
ENSG00000174231.16	PRPF8	protein_coding	45391.5	-0.6893	6.61495e-06	7.40751e-05	263.035	pre-mRNA processing factor 8 [Source:HGNC Symbol;Acc:HGNC:17340]
ENSG00000174371.16	EXO1	protein_coding	2647.8	-1.28322	2.55643e-16	2.33834e-14	52.3425	exonuclease 1 [Source:HGNC Symbol;Acc:HGNC:3511]
ENSG00000174428.16	GTF2IRD2B	protein_coding	135.236	0.988465	0.00224234	0.0109745	1.72307	GTF2I repeat domain containing 2B [Source:HGNC Symbol;Acc:HGNC:33125]
ENSG00000174442.11	ZWILCH	protein_coding	3830.25	-1.32839	2.3623e-13	1.36591e-11	70.1249	zwilch kinetochore protein [Source:HGNC Symbol;Acc:HGNC:25468]
ENSG00000174473.15	GALNTL6	protein_coding	108.442	-2.06786	1.56557e-07	2.62932e-06	1.10065	polypeptide N-acetylgalactosaminyltransferase like 6 [Source:HGNC Symbol;Acc:HGNC:33844]
ENSG00000174672.15	BRSK2	protein_coding	675.915	0.814403	2.05709e-05	0.000197652	6.05512	BR serine/threonine kinase 2 [Source:HGNC Symbol;Acc:HGNC:11405]
ENSG00000174780.15	SRP72	protein_coding	6838.87	-0.63449	3.59468e-06	4.33665e-05	93.4333	signal recognition particle 72 [Source:HGNC Symbol;Acc:HGNC:11303]
ENSG00000174839.12	DENND6A	protein_coding	1913.72	-0.595504	0.00072067	0.00424587	24.4467	DENN domain containing 6A [Source:HGNC Symbol;Acc:HGNC:26635]
ENSG00000175063.16	UBE2C	protein_coding	2960.36	-1.02254	1.49392e-11	6.12319e-10	166.591	ubiquitin conjugating enzyme E2 C [Source:HGNC Symbol;Acc:HGNC:15937]
ENSG00000175105.5	ZNF654	protein_coding	1494.31	0.768461	2.27367e-05	0.000215394	21.7872	zinc finger protein 654 [Source:HGNC Symbol;Acc:HGNC:25612]
ENSG00000175155.8	YPEL2	protein_coding	2276.84	0.879327	4.35133e-07	6.5594e-06	17.7793	yippee like 2 [Source:HGNC Symbol;Acc:HGNC:18326]
ENSG00000175193.12	PARL	protein_coding	1577.72	-0.690798	1.99969e-05	0.000192594	51.9003	presenilin associated rhomboid like [Source:HGNC Symbol;Acc:HGNC:18253]
ENSG00000175197.10	DDIT3	protein_coding	525.384	0.665206	0.000831622	0.00478464	26.8373	DNA damage inducible transcript 3 [Source:HGNC Symbol;Acc:HGNC:2726]
ENSG00000175265.17	GOLGA8A	protein_coding	442.09	0.675662	0.000972648	0.00547134	4.09101	golgin A8 family member A [Source:HGNC Symbol;Acc:HGNC:31972]
ENSG00000175279.21	APITD1	protein_coding	120.34	-1.00984	0.00222851	0.0109266	6.09508	centromere protein S [Source:HGNC Symbol;Acc:HGNC:23163]
ENSG00000175305.16	CCNE2	protein_coding	440.295	-0.668448	0.00337561	0.0153514	7.21959	cyclin E2 [Source:HGNC Symbol;Acc:HGNC:1590]
ENSG00000175322.11	ZNF519	protein_coding	328.179	-0.759211	0.00142704	0.00758996	1.54964	zinc finger protein 519 [Source:HGNC Symbol;Acc:HGNC:30574]
ENSG00000175334.7	BANF1	protein_coding	2222.07	-0.907699	1.91943e-09	4.94835e-08	99.0262	barrier to autointegration factor 1 [Source:HGNC Symbol;Acc:HGNC:17397]
ENSG00000175467.14	SART1	protein_coding	3077.75	-0.721588	2.84425e-07	4.48865e-06	46.6966	SART1, U4/U6.U5 tri-snRNP-associated protein 1 [Source:HGNC Symbol;Acc:HGNC:10538]
ENSG00000175575.12	PAAF1	protein_coding	1247.76	-0.681967	6.72587e-05	0.000555571	10.3058	proteasomal ATPase associated factor 1 [Source:HGNC Symbol;Acc:HGNC:25687]
ENSG00000175591.11	P2RY2	protein_coding	487.715	0.661968	0.000901068	0.00512049	10.3932	purinergic receptor P2Y2 [Source:HGNC Symbol;Acc:HGNC:8541]
ENSG00000175592.8	FOSL1	protein_coding	344.404	-0.863676	0.000177284	0.00127906	12.8473	FOS like 1, AP-1 transcription factor subunit [Source:HGNC Symbol;Acc:HGNC:13718]
ENSG00000175602.3	CCDC85B	protein_coding	640.729	-0.667337	0.000445506	0.00281638	27.5728	coiled-coil domain containing 85B [Source:HGNC Symbol;Acc:HGNC:24926]
ENSG00000175643.8	RMI2	protein_coding	1088.09	-0.919132	1.16929e-06	1.57102e-05	29.1939	RecQ mediated genome instability 2 [Source:HGNC Symbol;Acc:HGNC:28349]
ENSG00000175792.11	RUVBL1	protein_coding	5963.03	-0.613043	1.91531e-05	0.000185794	56.2789	RuvB like AAA ATPase 1 [Source:HGNC Symbol;Acc:HGNC:10474]
ENSG00000175874.9	CREG2	protein_coding	254.266	1.16984	9.58681e-05	0.000752354	3.28875	cellular repressor of E1A stimulated genes 2 [Source:HGNC Symbol;Acc:HGNC:14272]
ENSG00000175938.6	ORAI3	protein_coding	1077.95	1.35742	7.65228e-11	2.72287e-09	29.7941	ORAI calcium release-activated calcium modulator 3 [Source:HGNC Symbol;Acc:HGNC:28185]
ENSG00000176014.12	TUBB6	protein_coding	5384.01	0.647822	7.36641e-07	1.05077e-05	79.0808	tubulin beta 6 class V [Source:HGNC Symbol;Acc:HGNC:20776]
ENSG00000176102.11	CSTF3	protein_coding	2940.38	-0.593102	0.000135077	0.00101433	45.177	cleavage stimulation factor subunit 3 [Source:HGNC Symbol;Acc:HGNC:2485]
ENSG00000176170.13	SPHK1	protein_coding	156.607	0.992227	0.00206349	0.010262	2.77796	sphingosine kinase 1 [Source:HGNC Symbol;Acc:HGNC:11240]
ENSG00000176171.11	BNIP3	protein_coding	8841.93	2.12496	3.94454e-62	4.25748e-59	138.91	BCL2 interacting protein 3 [Source:HGNC Symbol;Acc:HGNC:1084]
ENSG00000176208.8	ATAD5	protein_coding	2752.08	-0.970822	3.05376e-08	6.10375e-07	31.1735	ATPase family, AAA domain containing 5 [Source:HGNC Symbol;Acc:HGNC:25752]
ENSG00000176225.12	RTTN	protein_coding	2789.18	-0.634512	0.000345382	0.00226845	21.787	rotatin [Source:HGNC Symbol;Acc:HGNC:18654]
ENSG00000176248.8	ANAPC2	protein_coding	1645.72	-0.846146	1.5758e-08	3.37017e-07	20.8055	anaphase promoting complex subunit 2 [Source:HGNC Symbol;Acc:HGNC:19989]
ENSG00000176273.14	SLC35G1	protein_coding	924.575	-0.736988	0.000129211	0.00097763	9.4187	solute carrier family 35 member G1 [Source:HGNC Symbol;Acc:HGNC:26607]
ENSG00000176383.8	B3GNT4	protein_coding	155.501	0.947402	0.00847088	0.0322009	2.77315	UDP-GlcNAc:betaGal beta-1,3-N-acetylglucosaminyltransferase 4 [Source:HGNC Symbol;Acc:HGNC:15683]
ENSG00000176399.3	DMRTA1	protein_coding	748.528	0.812423	1.94546e-05	0.000187817	8.45328	DMRT like family A1 [Source:HGNC Symbol;Acc:HGNC:13826]
ENSG00000176593.7	CTD-2368P22.1	processed_transcript	172.142	0.963226	0.000601815	0.00363288	1.28603
ENSG00000176619.10	LMNB2	protein_coding	7992.99	-0.633844	5.04e-06	5.8451e-05	97.7808	lamin B2 [Source:HGNC Symbol;Acc:HGNC:6638]
ENSG00000176720.4	BOK	protein_coding	863.24	1.20141	3.62321e-09	8.82681e-08	24.0494	BOK, BCL2 family apoptosis regulator [Source:HGNC Symbol;Acc:HGNC:1087]
ENSG00000176788.8	BASP1	protein_coding	14766	-0.589824	2.14088e-06	2.7233e-05	446.578	brain abundant membrane attached signal protein 1 [Source:HGNC Symbol;Acc:HGNC:957]
ENSG00000176809.10	LRRC37A3	protein_coding	335.199	0.794256	0.00493034	0.0210058	3.33348	leucine rich repeat containing 37 member A3 [Source:HGNC Symbol;Acc:HGNC:32427]
ENSG00000176834.13	VSIG10	protein_coding	3835.04	0.618514	0.00171394	0.00880344	30.5475	V-set and immunoglobulin domain containing 10 [Source:HGNC Symbol;Acc:HGNC:26078]
ENSG00000176845.12	METRNL	protein_coding	205.823	1.65443	8.72437e-09	1.95634e-07	7.23181	meteorin like, glial cell differentiation regulator [Source:HGNC Symbol;Acc:HGNC:27584]
ENSG00000176890.15	TYMS	protein_coding	2899.23	-1.46827	1.37832e-15	1.09926e-13	93.4319	thymidylate synthetase [Source:HGNC Symbol;Acc:HGNC:12441]
ENSG00000176973.7	FAM89B	protein_coding	333.704	0.594744	0.00870057	0.0329117	13.8009	family with sequence similarity 89 member B [Source:HGNC Symbol;Acc:HGNC:16708]
ENSG00000177034.14	MTX3	protein_coding	1288.99	-0.635238	0.000150993	0.00111522	18.3301	metaxin 3 [Source:HGNC Symbol;Acc:HGNC:24812]
ENSG00000177084.16	POLE	protein_coding	6387.05	-0.70104	2.38843e-07	3.84381e-06	25.0755	DNA polymerase epsilon, catalytic subunit [Source:HGNC Symbol;Acc:HGNC:9177]
ENSG00000177119.15	ANO6	protein_coding	27402.1	1.51493	1.29365e-14	9.1062e-13	278.73	anoctamin 6 [Source:HGNC Symbol;Acc:HGNC:25240]
ENSG00000177181.14	RIMKLA	protein_coding	1347.93	1.72223	2.78272e-21	4.46062e-19	11.8058	ribosomal modification protein rimK like family member A [Source:HGNC Symbol;Acc:HGNC:28725]
ENSG00000177192.13	PUS1	protein_coding	1358.8	-0.681106	0.000281685	0.00190735	17.072	pseudouridylate synthase 1 [Source:HGNC Symbol;Acc:HGNC:15508]
ENSG00000177374.12	HIC1	protein_coding	126.147	1.25929	0.00123316	0.00670414	1.6009	HIC ZBTB transcriptional repressor 1 [Source:HGNC Symbol;Acc:HGNC:4909]
ENSG00000177427.12	MIEF2	protein_coding	1178.17	0.636908	0.00109965	0.00606796	19.1862	mitochondrial elongation factor 2 [Source:HGNC Symbol;Acc:HGNC:17920]
ENSG00000177453.7	NIM1K	protein_coding	55.8793	1.54888	7.45871e-05	0.000604387	1.4193	NIM1 serine/threonine protein kinase [Source:HGNC Symbol;Acc:HGNC:28646]
ENSG00000177469.12	PTRF	protein_coding	33181.2	1.28002	6.91917e-14	4.32515e-12	650.321	caveolae associated protein 1 [Source:HGNC Symbol;Acc:HGNC:9688]
ENSG00000177542.10	SLC25A22	protein_coding	784.376	-0.686847	0.000302196	0.00202674	12.0727	solute carrier family 25 member 22 [Source:HGNC Symbol;Acc:HGNC:19954]
ENSG00000177602.5	GSG2	protein_coding	1115.98	-0.703337	0.000317351	0.00210914	28.0197	histone H3 associated protein kinase [Source:HGNC Symbol;Acc:HGNC:19682]
ENSG00000177606.6	JUN	protein_coding	3425.19	2.34331	4.62879e-42	2.77556e-39	89.428	Jun proto-oncogene, AP-1 transcription factor subunit [Source:HGNC Symbol;Acc:HGNC:6204]
ENSG00000177679.15	SRRM3	protein_coding	634.077	1.28994	1.61375e-10	5.34288e-09	7.29511	serine/arginine repetitive matrix 3 [Source:HGNC Symbol;Acc:HGNC:26729]
ENSG00000177697.17	CD151	protein_coding	21254.2	0.617218	6.90625e-06	7.6794e-05	342.823	CD151 molecule (Raph blood group) [Source:HGNC Symbol;Acc:HGNC:1630]
ENSG00000177989.13	ODF3B	protein_coding	282.192	0.724352	0.0121337	0.0430894	10.0555	outer dense fiber of sperm tails 3B [Source:HGNC Symbol;Acc:HGNC:34388]
ENSG00000178026.12	LRRC75B	protein_coding	781.379	0.643686	0.000802441	0.0046448	15.6573	leucine rich repeat containing 75B [Source:HGNC Symbol;Acc:HGNC:33155]
ENSG00000178038.16	ALS2CL	protein_coding	848.08	0.609945	0.0037118	0.0165914	6.48292	ALS2 C-terminal like [Source:HGNC Symbol;Acc:HGNC:20605]
ENSG00000178074.5	C2orf69	protein_coding	1226.11	-0.659885	0.00143602	0.00761271	22.1181	chromosome 2 open reading frame 69 [Source:HGNC Symbol;Acc:HGNC:26799]
ENSG00000178105.9	DDX10	protein_coding	2472.79	-0.724729	6.3417e-07	9.22909e-06	20.0563	DEAD-box helicase 10 [Source:HGNC Symbol;Acc:HGNC:2735]
ENSG00000178149.16	DALRD3	protein_coding	1493.38	0.679994	8.03434e-06	8.74755e-05	25.7118	DALR anticodon binding domain containing 3 [Source:HGNC Symbol;Acc:HGNC:25536]
ENSG00000178409.13	BEND3	protein_coding	438.584	-0.906507	1.32112e-05	0.000134691	5.12872	BEN domain containing 3 [Source:HGNC Symbol;Acc:HGNC:23040]
ENSG00000178573.6	MAF	protein_coding	93.3853	2.45146	2.34729e-09	5.9194e-08	1.81036	MAF bZIP transcription factor [Source:HGNC Symbol;Acc:HGNC:6776]
ENSG00000178773.14	CPNE7	protein_coding	1775.1	0.667669	1.11812e-05	0.000116204	37.8472	copine 7 [Source:HGNC Symbol;Acc:HGNC:2320]
ENSG00000178802.17	MPI	protein_coding	5977.22	0.974995	4.57263e-11	1.71765e-09	43.2924	mannose phosphate isomerase [Source:HGNC Symbol;Acc:HGNC:7216]
ENSG00000178921.13	PFAS	protein_coding	7253.18	-0.923543	3.67766e-09	8.92673e-08	83.3879	phosphoribosylformylglycinamidine synthase [Source:HGNC Symbol;Acc:HGNC:8863]
ENSG00000178922.16	HYI	protein_coding	287.744	1.33107	2.12271e-08	4.42299e-07	8.38076	hydroxypyruvate isomerase (putative) [Source:HGNC Symbol;Acc:HGNC:26948]
ENSG00000178966.15	RMI1	protein_coding	592.572	-1.38989	2.58683e-09	6.44321e-08	14.1501	RecQ mediated genome instability 1 [Source:HGNC Symbol;Acc:HGNC:25764]
ENSG00000178999.12	AURKB	protein_coding	2571.54	-0.810008	1.49816e-07	2.52921e-06	80.6923	aurora kinase B [Source:HGNC Symbol;Acc:HGNC:11390]
ENSG00000179041.3	RRS1	protein_coding	1290.72	-1.47821	3.7544e-18	4.22109e-16	63.6988	ribosome biogenesis regulator homolog [Source:HGNC Symbol;Acc:HGNC:17083]
ENSG00000179085.7	DPM3	protein_coding	660.714	-0.809248	1.16274e-05	0.000120363	71.2614	dolichyl-phosphate mannosyltransferase subunit 3 [Source:HGNC Symbol;Acc:HGNC:3007]
ENSG00000179218.13	CALR	protein_coding	52345.8	-0.628375	8.36396e-07	1.17342e-05	1237.06	calreticulin [Source:HGNC Symbol;Acc:HGNC:1455]
ENSG00000179409.10	GEMIN4	protein_coding	4414.31	-0.679476	1.11154e-06	1.50341e-05	52.6943	gem nuclear organelle associated protein 4 [Source:HGNC Symbol;Acc:HGNC:15717]
ENSG00000179715.12	PCED1B	protein_coding	6234.16	1.29038	2.75914e-16	2.4817e-14	172.535	PC-esterase domain containing 1B [Source:HGNC Symbol;Acc:HGNC:28255]
ENSG00000179750.15	APOBEC3B	protein_coding	379.074	-1.36138	1.44749e-09	3.91233e-08	15.4441	apolipoprotein B mRNA editing enzyme catalytic subunit 3B [Source:HGNC Symbol;Acc:HGNC:17352]
ENSG00000179820.15	MYADM	protein_coding	9859.48	0.631268	0.000283391	0.0019129	168.157	myeloid associated differentiation marker [Source:HGNC Symbol;Acc:HGNC:7544]
ENSG00000179832.17	MROH1	protein_coding	1392.23	0.774732	8.14963e-07	1.14533e-05	8.02035	maestro heat like repeat family member 1 [Source:HGNC Symbol;Acc:HGNC:26958]
ENSG00000179841.8	AKAP5	protein_coding	624.509	0.801202	2.11723e-05	0.000202737	5.54541	A-kinase anchoring protein 5 [Source:HGNC Symbol;Acc:HGNC:375]
ENSG00000179862.6	CITED4	protein_coding	523.789	0.641956	0.00289397	0.0135375	23.904	Cbp/p300 interacting transactivator with Glu/Asp rich carboxy-terminal domain 4 [Source:HGNC Symbol;Acc:HGNC:18696]
ENSG00000179958.8	DCTPP1	protein_coding	1733.54	-1.01047	2.43695e-11	9.74177e-10	78.5205	dCTP pyrophosphatase 1 [Source:HGNC Symbol;Acc:HGNC:28777]
ENSG00000180376.16	CCDC66	protein_coding	1316.3	-0.712417	8.26072e-05	0.000660449	10.4615	coiled-coil domain containing 66 [Source:HGNC Symbol;Acc:HGNC:27709]
ENSG00000180448.10	HMHA1	protein_coding	206.488	1.19779	6.01902e-05	0.000503347	2.97637	Rho GTPase activating protein 45 [Source:HGNC Symbol;Acc:HGNC:17102]
ENSG00000180479.13	ZNF571	protein_coding	259.107	0.682092	0.00764487	0.0297025	3.80981	zinc finger protein 571 [Source:HGNC Symbol;Acc:HGNC:25000]
ENSG00000180573.9	HIST1H2AC	protein_coding	10392.2	-0.624618	2.33395e-06	2.94518e-05	412.274	histone cluster 1 H2A family member c [Source:HGNC Symbol;Acc:HGNC:4733]
ENSG00000180596.7	HIST1H2BC	protein_coding	10175.8	-0.896188	4.09329e-08	7.89874e-07	838.99	histone cluster 1 H2B family member c [Source:HGNC Symbol;Acc:HGNC:4757]
ENSG00000180758.11	GPR157	protein_coding	993.943	0.646739	0.000152214	0.00112373	10.9347	G protein-coupled receptor 157 [Source:HGNC Symbol;Acc:HGNC:23687]
ENSG00000180914.10	OXTR	protein_coding	562.963	1.12984	5.1827e-08	9.71156e-07	8.98832	oxytocin receptor [Source:HGNC Symbol;Acc:HGNC:8529]
ENSG00000180938.5	ZNF572	protein_coding	253.481	0.618559	0.0121303	0.0430867	4.7627	zinc finger protein 572 [Source:HGNC Symbol;Acc:HGNC:26758]
ENSG00000180957.17	PITPNB	protein_coding	1593.29	-0.728143	0.000235814	0.00163435	21.1668	phosphatidylinositol transfer protein beta [Source:HGNC Symbol;Acc:HGNC:9002]
ENSG00000181026.14	AEN	protein_coding	5349.15	-0.981098	5.87373e-14	3.72924e-12	62.2851	apoptosis enhancing nuclease [Source:HGNC Symbol;Acc:HGNC:25722]
ENSG00000181045.14	SLC26A11	protein_coding	1175.08	0.620045	0.000182018	0.00130624	14.0778	solute carrier family 26 member 11 [Source:HGNC Symbol;Acc:HGNC:14471]
ENSG00000181284.2	TMEM102	protein_coding	1022.88	0.827544	0.00034564	0.00226922	35.218	transmembrane protein 102 [Source:HGNC Symbol;Acc:HGNC:26722]
ENSG00000181449.3	SOX2	protein_coding	978.092	-1.09338	6.97973e-06	7.75047e-05	30.2063	SRY-box 2 [Source:HGNC Symbol;Acc:HGNC:11195]
ENSG00000181458.10	TMEM45A	protein_coding	1572.77	2.84409	1.65215e-42	1.02878e-39	25.235	transmembrane protein 45A [Source:HGNC Symbol;Acc:HGNC:25480]
ENSG00000181544.13	FANCB	protein_coding	954.337	-0.825126	0.000128387	0.00097403	24.1769	Fanconi anemia complementation group B [Source:HGNC Symbol;Acc:HGNC:3583]
ENSG00000181588.16	MEX3D	protein_coding	1174.46	0.777853	1.94662e-06	2.49927e-05	25.7773	mex-3 RNA binding family member D [Source:HGNC Symbol;Acc:HGNC:16734]
ENSG00000181649.5	PHLDA2	protein_coding	198.245	-0.787796	0.00416458	0.0182665	14.0706	pleckstrin homology like domain family A member 2 [Source:HGNC Symbol;Acc:HGNC:12385]
ENSG00000181938.13	GINS3	protein_coding	1714.46	-0.692627	0.000630435	0.0037901	22.7865	GINS complex subunit 3 [Source:HGNC Symbol;Acc:HGNC:25851]
ENSG00000182004.12	SNRPE	protein_coding	1776.52	-0.770363	6.01335e-05	0.000503132	93.663	small nuclear ribonucleoprotein polypeptide E [Source:HGNC Symbol;Acc:HGNC:11161]
ENSG00000182010.10	RTKN2	protein_coding	538.943	-0.820859	0.00012716	0.000965173	4.24982	rhotekin 2 [Source:HGNC Symbol;Acc:HGNC:19364]
ENSG00000182054.9	IDH2	protein_coding	6819.36	1.46301	1.31093e-26	3.07593e-24	178.764	isocitrate dehydrogenase (NADP(+)) 2, mitochondrial [Source:HGNC Symbol;Acc:HGNC:5383]
ENSG00000182134.15	TDRKH	protein_coding	921.92	-0.88192	1.28877e-06	1.71589e-05	13.1202	tudor and KH domain containing [Source:HGNC Symbol;Acc:HGNC:11713]
ENSG00000182240.15	BACE2	protein_coding	3319.63	1.23842	4.70916e-15	3.48134e-13	27.013	beta-site APP-cleaving enzyme 2 [Source:HGNC Symbol;Acc:HGNC:934]
ENSG00000182253.14	SYNM	protein_coding	4463.82	-0.632838	7.48e-06	8.2214e-05	38.8602	synemin [Source:HGNC Symbol;Acc:HGNC:24466]
ENSG00000182272.11	B4GALNT4	protein_coding	1333.82	0.765877	2.51722e-05	0.00023598	25.4725	beta-1,4-N-acetyl-galactosaminyltransferase 4 [Source:HGNC Symbol;Acc:HGNC:26315]
ENSG00000182472.8	CAPN12	protein_coding	560.218	1.08605	7.30699e-06	8.05311e-05	7.21938	calpain 12 [Source:HGNC Symbol;Acc:HGNC:13249]
ENSG00000182481.8	KPNA2	protein_coding	23741.2	-0.744164	5.59373e-09	1.31441e-07	521.614	karyopherin subunit alpha 2 [Source:HGNC Symbol;Acc:HGNC:6395]
ENSG00000182534.13	MXRA7	protein_coding	3627.1	1.01582	7.78483e-10	2.24575e-08	29.5457	matrix remodeling associated 7 [Source:HGNC Symbol;Acc:HGNC:7541]
ENSG00000182580.2	EPHB3	protein_coding	131.607	-1.36403	1.61536e-05	0.000160639	2.52689	EPH receptor B3 [Source:HGNC Symbol;Acc:HGNC:3394]
ENSG00000182600.9	C2orf82	protein_coding	975.243	1.31244	1.94415e-09	4.98823e-08	20.7492	chromosome 2 open reading frame 82 [Source:HGNC Symbol;Acc:HGNC:33763]
ENSG00000182648.11	LINC01006	lincRNA	522.743	0.871239	8.23302e-06	8.92186e-05	8.79701	long intergenic non-protein coding RNA 1006 [Source:HGNC Symbol;Acc:HGNC:48971]
ENSG00000182749.5	PAQR7	protein_coding	947.769	0.628498	0.000168223	0.00122406	17.9661	progestin and adipoQ receptor family member 7 [Source:HGNC Symbol;Acc:HGNC:23146]
ENSG00000182795.12	C1orf116	protein_coding	1656.33	0.659247	0.00193394	0.00970266	18.1516	chromosome 1 open reading frame 116 [Source:HGNC Symbol;Acc:HGNC:28667]
ENSG00000182796.12	TMEM198B	unitary_pseudogene	518.222	0.775404	0.000136101	0.00101993	10.0488	transmembrane protein 198B (pseudogene) [Source:HGNC Symbol;Acc:HGNC:43629]
ENSG00000182836.9	PLCXD3	protein_coding	3010.28	1.07653	3.45741e-08	6.79494e-07	29.2305	phosphatidylinositol specific phospholipase C X domain containing 3 [Source:HGNC Symbol;Acc:HGNC:31822]
ENSG00000182871.14	COL18A1	protein_coding	13894.9	0.614966	6.47466e-07	9.3761e-06	109.065	collagen type XVIII alpha 1 chain [Source:HGNC Symbol;Acc:HGNC:2195]
ENSG00000182903.15	ZNF721	protein_coding	1118.97	-0.632855	0.000473899	0.0029692	11.8541	zinc finger protein 721 [Source:HGNC Symbol;Acc:HGNC:29425]
ENSG00000183010.16	PYCR1	protein_coding	3369.86	-0.890583	1.93854e-09	4.98173e-08	82.8393	pyrroline-5-carboxylate reductase 1 [Source:HGNC Symbol;Acc:HGNC:9721]
ENSG00000183018.8	SPNS2	protein_coding	178.334	2.38159	3.31576e-13	1.85752e-11	4.32131	sphingolipid transporter 2 [Source:HGNC Symbol;Acc:HGNC:26992]
ENSG00000183049.12	CAMK1D	protein_coding	2769.34	0.641727	0.000348483	0.00228511	22.4112	calcium/calmodulin dependent protein kinase ID [Source:HGNC Symbol;Acc:HGNC:19341]
ENSG00000183098.10	GPC6	protein_coding	2673.64	0.733926	1.11522e-06	1.50713e-05	28.0248	glypican 6 [Source:HGNC Symbol;Acc:HGNC:4454]
ENSG00000183111.11	ARHGEF37	protein_coding	1032.58	1.35509	6.25068e-14	3.93768e-12	14.0067	Rho guanine nucleotide exchange factor 37 [Source:HGNC Symbol;Acc:HGNC:34430]
ENSG00000183255.11	PTTG1IP	protein_coding	14510.3	0.896485	3.65378e-11	1.39187e-09	269.436	PTTG1 interacting protein [Source:HGNC Symbol;Acc:HGNC:13524]
ENSG00000183386.9	FHL3	protein_coding	281.441	0.858431	0.000309399	0.00206564	8.91206	four and a half LIM domains 3 [Source:HGNC Symbol;Acc:HGNC:3704]
ENSG00000183421.11	RIPK4	protein_coding	1397.03	0.813755	8.68437e-06	9.33599e-05	26.0033	receptor interacting serine/threonine kinase 4 [Source:HGNC Symbol;Acc:HGNC:496]
ENSG00000183495.13	EP400	protein_coding	3101.73	-0.585495	3.60283e-05	0.000323695	10.4758	E1A binding protein p400 [Source:HGNC Symbol;Acc:HGNC:11958]
ENSG00000183496.5	MEX3B	protein_coding	515.925	0.75112	0.000420761	0.002683	7.56955	mex-3 RNA binding family member B [Source:HGNC Symbol;Acc:HGNC:25297]
ENSG00000183527.11	PSMG1	protein_coding	1589.27	-0.736711	1.34962e-06	1.78955e-05	43.1237	proteasome assembly chaperone 1 [Source:HGNC Symbol;Acc:HGNC:3043]
ENSG00000183579.15	ZNRF3	protein_coding	2428.88	-0.925887	4.12538e-07	6.24204e-06	24.9145	zinc and ring finger 3 [Source:HGNC Symbol;Acc:HGNC:18126]
ENSG00000183598.3	HIST2H3D	protein_coding	2250.73	-0.711	5.14581e-06	5.95927e-05	388.27	histone cluster 2 H3 family member d [Source:HGNC Symbol;Acc:HGNC:25311]
ENSG00000183605.16	SFXN4	protein_coding	1549.76	-0.780893	3.6766e-07	5.64745e-06	57.4581	sideroflexin 4 [Source:HGNC Symbol;Acc:HGNC:16088]
ENSG00000183615.5	FAM167B	protein_coding	143.02	1.17431	0.000598442	0.00361387	13.4326	family with sequence similarity 167 member B [Source:HGNC Symbol;Acc:HGNC:28133]
ENSG00000183624.13	HMCES	protein_coding	1501.01	-0.618505	4.49068e-05	0.000390463	34.6622	5-hydroxymethylcytosine binding, ES cell specific [Source:HGNC Symbol;Acc:HGNC:24446]
ENSG00000183684.7	ALYREF	protein_coding	5332.79	-0.859579	1.14817e-07	2.00311e-06	235.045	Aly/REF export factor [Source:HGNC Symbol;Acc:HGNC:19071]
ENSG00000183688.4	FAM101B	protein_coding	2113.36	-0.784707	0.000124686	0.00095041	42.5329	refilin B [Source:HGNC Symbol;Acc:HGNC:28705]
ENSG00000183763.8	TRAIP	protein_coding	573.214	-0.892588	1.22606e-05	0.000126272	13.3707	TRAF interacting protein [Source:HGNC Symbol;Acc:HGNC:30764]
ENSG00000183765.20	CHEK2	protein_coding	1183.24	-0.58696	0.00034373	0.00226035	18.5204	checkpoint kinase 2 [Source:HGNC Symbol;Acc:HGNC:16627]
ENSG00000183779.6	ZNF703	protein_coding	549.462	-0.793036	0.00100873	0.00565491	11.1823	zinc finger protein 703 [Source:HGNC Symbol;Acc:HGNC:25883]
ENSG00000183798.4	EMILIN3	protein_coding	72.9994	1.56064	0.000176567	0.00127503	2.49416	elastin microfibril interfacer 3 [Source:HGNC Symbol;Acc:HGNC:16123]
ENSG00000183814.15	LIN9	protein_coding	1201.24	-0.849801	5.19211e-06	6.00859e-05	20.9091	lin-9 DREAM MuvB core complex component [Source:HGNC Symbol;Acc:HGNC:30830]
ENSG00000183873.15	SCN5A	protein_coding	113.05	1.73539	4.95331e-06	5.75693e-05	1.28899	sodium voltage-gated channel alpha subunit 5 [Source:HGNC Symbol;Acc:HGNC:10593]
ENSG00000184009.9	ACTG1	protein_coding	234075	0.704688	2.84457e-07	4.48865e-06	5319.88	actin gamma 1 [Source:HGNC Symbol;Acc:HGNC:144]
ENSG00000184014.7	DENND5A	protein_coding	6580.96	0.836841	1.83025e-09	4.77161e-08	52.5725	DENN domain containing 5A [Source:HGNC Symbol;Acc:HGNC:19344]
ENSG00000184160.7	ADRA2C	protein_coding	535.234	1.11592	7.22768e-06	7.9778e-05	18.4547	adrenoceptor alpha 2C [Source:HGNC Symbol;Acc:HGNC:283]
ENSG00000184164.14	CRELD2	protein_coding	1152.63	-0.738938	1.17121e-05	0.000121085	15.1002	cysteine rich with EGF like domains 2 [Source:HGNC Symbol;Acc:HGNC:28150]
ENSG00000184178.15	SCFD2	protein_coding	1003.97	-0.587479	0.000486612	0.00303009	19.9915	sec1 family domain containing 2 [Source:HGNC Symbol;Acc:HGNC:30676]
ENSG00000184205.14	TSPYL2	protein_coding	1208.52	-0.645574	0.00556996	0.0230929	15.8173	TSPY like 2 [Source:HGNC Symbol;Acc:HGNC:24358]
ENSG00000184220.10	CMSS1	protein_coding	1535.54	-0.708949	3.24727e-06	3.95883e-05	24.5951	cms1 ribosomal small subunit homolog (yeast) [Source:HGNC Symbol;Acc:HGNC:28666]
ENSG00000184232.8	OAF	protein_coding	409.874	-1.02604	7.99897e-06	8.72076e-05	9.63956	out at first homolog [Source:HGNC Symbol;Acc:HGNC:28752]
ENSG00000184260.5	HIST2H2AC	protein_coding	8119.93	-0.760453	4.40649e-09	1.06005e-07	1372.52	histone cluster 2 H2A family member c [Source:HGNC Symbol;Acc:HGNC:4738]
ENSG00000184270.4	HIST2H2AB	protein_coding	5033.65	-1.12613	5.20416e-16	4.4345e-14	946.414	histone cluster 2 H2A family member b [Source:HGNC Symbol;Acc:HGNC:20508]
ENSG00000184349.12	EFNA5	protein_coding	2854.38	0.676741	0.000134281	0.0010107	35.2144	ephrin A5 [Source:HGNC Symbol;Acc:HGNC:3225]
ENSG00000184357.4	HIST1H1B	protein_coding	4590.56	-1.37454	6.07342e-12	2.71626e-10	578.948	histone cluster 1 H1 family member b [Source:HGNC Symbol;Acc:HGNC:4719]
ENSG00000184363.9	PKP3	protein_coding	3002.86	0.69475	1.3919e-05	0.000140931	50.6574	plakophilin 3 [Source:HGNC Symbol;Acc:HGNC:9025]
ENSG00000184384.13	MAML2	protein_coding	1324.12	0.906226	2.51566e-05	0.00023597	14.6622	mastermind like transcriptional coactivator 2 [Source:HGNC Symbol;Acc:HGNC:16259]
ENSG00000184414.2	RP11-44M6.3	processed_pseudogene	64.8852	1.47052	0.000373067	0.00242277	7.43801	insulin receptor substrate 3, pseudogene [Source:HGNC Symbol;Acc:HGNC:6127]
ENSG00000184441.4	AP001062.7	antisense	224.128	1.54355	2.57601e-08	5.24599e-07	4.17366
ENSG00000184481.16	FOXO4	protein_coding	477.778	0.669765	0.00136389	0.00729965	8.73567	forkhead box O4 [Source:HGNC Symbol;Acc:HGNC:7139]
ENSG00000184489.11	PTP4A3	protein_coding	477.27	0.649527	0.00189249	0.00954497	14.9155	protein tyrosine phosphatase type IVA, member 3 [Source:HGNC Symbol;Acc:HGNC:9636]
ENSG00000184545.10	DUSP8	protein_coding	244.138	0.84023	0.00121004	0.00659837	3.87078	dual specificity phosphatase 8 [Source:HGNC Symbol;Acc:HGNC:3074]
ENSG00000184557.4	SOCS3	protein_coding	1512.92	0.707308	8.49268e-06	9.14814e-05	36.2992	suppressor of cytokine signaling 3 [Source:HGNC Symbol;Acc:HGNC:19391]
ENSG00000184575.11	XPOT	protein_coding	14034.2	-0.703585	2.66375e-05	0.000248566	134.87	exportin for tRNA [Source:HGNC Symbol;Acc:HGNC:12826]
ENSG00000184678.9	HIST2H2BE	protein_coding	7313.79	-0.899077	9.87423e-10	2.7706e-08	230.589	histone cluster 2 H2B family member e [Source:HGNC Symbol;Acc:HGNC:4760]
ENSG00000184831.13	APOO	protein_coding	1109.14	-0.677032	4.44412e-05	0.000387246	31.4868	apolipoprotein O [Source:HGNC Symbol;Acc:HGNC:28727]
ENSG00000184845.3	DRD1	protein_coding	403.633	-0.863235	0.00304129	0.0140923	7.2098	dopamine receptor D1 [Source:HGNC Symbol;Acc:HGNC:3020]
ENSG00000184860.9	SDR42E1	protein_coding	504.618	0.614726	0.00183838	0.00932146	2.63885	short chain dehydrogenase/reductase family 42E, member 1 [Source:HGNC Symbol;Acc:HGNC:29834]
ENSG00000184903.9	IMMP2L	protein_coding	1302.11	-0.665696	0.00167433	0.00863569	26.7425	inner mitochondrial membrane peptidase subunit 2 [Source:HGNC Symbol;Acc:HGNC:14598]
ENSG00000184916.8	JAG2	protein_coding	1135.06	0.885993	3.80885e-07	5.80652e-06	12.4936	jagged 2 [Source:HGNC Symbol;Acc:HGNC:6189]
ENSG00000184939.15	ZFP90	protein_coding	4261.5	0.688026	1.85679e-05	0.000181382	37.5998	ZFP90 zinc finger protein [Source:HGNC Symbol;Acc:HGNC:23329]
ENSG00000184985.16	SORCS2	protein_coding	531.949	2.37039	4.03335e-22	6.9468e-20	8.7668	sortilin related VPS10 domain containing receptor 2 [Source:HGNC Symbol;Acc:HGNC:16698]
ENSG00000184992.10	BRI3BP	protein_coding	6220.54	-0.867379	7.65217e-10	2.22023e-08	66.9634	BRI3 binding protein [Source:HGNC Symbol;Acc:HGNC:14251]
ENSG00000185010.13	F8	protein_coding	824.758	0.639593	0.000709622	0.00418686	5.82606	coagulation factor VIII [Source:HGNC Symbol;Acc:HGNC:3546]
ENSG00000185022.11	MAFF	protein_coding	447.092	1.94316	1.21117e-13	7.34415e-12	6.58149	MAF bZIP transcription factor F [Source:HGNC Symbol;Acc:HGNC:6780]
ENSG00000185033.14	SEMA4B	protein_coding	6472.6	0.683722	4.32206e-05	0.000378853	65.4791	semaphorin 4B [Source:HGNC Symbol;Acc:HGNC:10730]
ENSG00000185043.10	CIB1	protein_coding	4990.9	0.635684	0.000181225	0.00130228	280.964	calcium and integrin binding 1 [Source:HGNC Symbol;Acc:HGNC:16920]
ENSG00000185046.18	ANKS1B	protein_coding	547.663	0.847826	0.000125893	0.000957357	3.39472	ankyrin repeat and sterile alpha motif domain containing 1B [Source:HGNC Symbol;Acc:HGNC:24600]
ENSG00000185055.10	EFCAB10	protein_coding	136.66	-1.47494	6.54187e-06	7.34996e-05	4.90053	EF-hand calcium binding domain 10 [Source:HGNC Symbol;Acc:HGNC:34531]
ENSG00000185088.13	RPS27L	protein_coding	10680.6	-0.653033	1.41287e-05	0.000142609	82.9991	ribosomal protein S27 like [Source:HGNC Symbol;Acc:HGNC:18476]
ENSG00000185101.12	ANO9	protein_coding	136.497	0.986812	0.00273923	0.0129182	1.84485	anoctamin 9 [Source:HGNC Symbol;Acc:HGNC:20679]
ENSG00000185130.5	HIST1H2BL	protein_coding	6076.8	-1.10289	9.2406e-11	3.22425e-09	915.969	histone cluster 1 H2B family member l [Source:HGNC Symbol;Acc:HGNC:4748]
ENSG00000185168.5	LINC00482	lincRNA	241.139	1.1956	4.19932e-06	4.97344e-05	8.25786	long intergenic non-protein coding RNA 482 [Source:HGNC Symbol;Acc:HGNC:26816]
ENSG00000185189.15	NRBP2	protein_coding	1753.11	0.641705	0.000500056	0.00310054	25.2939	nuclear receptor binding protein 2 [Source:HGNC Symbol;Acc:HGNC:19339]
ENSG00000185238.12	PRMT3	protein_coding	2307.31	-1.03454	6.81013e-12	3.00425e-10	31.5102	protein arginine methyltransferase 3 [Source:HGNC Symbol;Acc:HGNC:30163]
ENSG00000185332.6	TMEM105	protein_coding	207.619	1.1784	1.06719e-05	0.000111613	3.85054	transmembrane protein 105 [Source:HGNC Symbol;Acc:HGNC:26794]
ENSG00000185480.11	PARPBP	protein_coding	2794.53	-0.889986	7.70179e-06	8.43083e-05	47.8348	PARP1 binding protein [Source:HGNC Symbol;Acc:HGNC:26074]
ENSG00000185513.14	L3MBTL1	protein_coding	250.367	0.812073	0.0038146	0.0169759	1.65955	L3MBTL1, histone methyl-lysine binding protein [Source:HGNC Symbol;Acc:HGNC:15905]
ENSG00000185519.8	FAM131C	protein_coding	331.895	0.881305	0.00253869	0.0121458	15.0223	family with sequence similarity 131 member C [Source:HGNC Symbol;Acc:HGNC:26717]
ENSG00000185522.8	LMNTD2	protein_coding	530.193	1.05214	6.91487e-07	9.94243e-06	12.2658	lamin tail domain containing 2 [Source:HGNC Symbol;Acc:HGNC:28561]
ENSG00000185551.12	NR2F2	protein_coding	1528.97	-0.718072	0.00284986	0.0133543	16.6577	nuclear receptor subfamily 2 group F member 2 [Source:HGNC Symbol;Acc:HGNC:7976]
ENSG00000185567.6	AHNAK2	protein_coding	61889	0.747665	4.53829e-09	1.08663e-07	209.516	AHNAK nucleoprotein 2 [Source:HGNC Symbol;Acc:HGNC:20125]
ENSG00000185585.19	OLFML2A	protein_coding	3432.11	0.817254	1.10163e-05	0.000114697	38.8178	olfactomedin like 2A [Source:HGNC Symbol;Acc:HGNC:27270]
ENSG00000185650.9	ZFP36L1	protein_coding	11144.6	0.625816	8.72379e-06	9.37214e-05	129.14	ZFP36 ring finger protein like 1 [Source:HGNC Symbol;Acc:HGNC:1107]
ENSG00000185745.9	IFIT1	protein_coding	339.306	-0.871718	0.00011822	0.000907101	13.1837	interferon induced protein with tetratricopeptide repeats 1 [Source:HGNC Symbol;Acc:HGNC:5407]
ENSG00000185798.7	WDR53	protein_coding	345.997	-0.605026	0.00696441	0.0275211	12.3329	WD repeat domain 53 [Source:HGNC Symbol;Acc:HGNC:28786]
ENSG00000185875.12	THNSL1	protein_coding	1232.65	-0.597122	0.00187292	0.00946692	23.0211	threonine synthase like 1 [Source:HGNC Symbol;Acc:HGNC:26160]
[truncated: 491 more rows]

## Sheet: MCF-7_DEGs
GENCODE_gene_id	gene_name	gene_type	MCF-7.baseMean	MCF-7.log2FoldChange	MCF-7.pvalue	MCF-7.padj	MCF7.maxTPM	description
ENSG00000001497.16	LAS1L	protein_coding	1739.56	-0.71991	0.00371085	0.017219	27.5086	LAS1 like, ribosome biogenesis factor [Source:HGNC Symbol;Acc:HGNC:25726]
ENSG00000002330.13	BAD	protein_coding	1572.19	0.692881	0.00491888	0.0215806	67.4409	BCL2 associated agonist of cell death [Source:HGNC Symbol;Acc:HGNC:936]
ENSG00000002549.12	LAP3	protein_coding	1748.81	-1.34005	5.61953e-09	1.51844e-07	47.337	leucine aminopeptidase 3 [Source:HGNC Symbol;Acc:HGNC:18449]
ENSG00000002822.15	MAD1L1	protein_coding	1677.17	-0.750771	0.000953052	0.0055672	19.6932	mitotic arrest deficient 1 like 1 [Source:HGNC Symbol;Acc:HGNC:6762]
ENSG00000003137.8	CYP26B1	protein_coding	52.493	-2.40011	4.46256e-06	5.6034e-05	1.25895	cytochrome P450 family 26 subfamily B member 1 [Source:HGNC Symbol;Acc:HGNC:20581]
ENSG00000003249.13	DBNDD1	protein_coding	3092.13	0.857376	0.00154613	0.00837401	49.3339	dysbindin domain containing 1 [Source:HGNC Symbol;Acc:HGNC:28455]
ENSG00000003989.16	SLC7A2	protein_coding	65970.2	-0.585926	0.0105236	0.0396442	739.042	solute carrier family 7 member 2 [Source:HGNC Symbol;Acc:HGNC:11060]
ENSG00000004139.13	SARM1	protein_coding	959.849	-0.807037	0.000538266	0.00344121	7.2575	sterile alpha and TIR motif containing 1 [Source:HGNC Symbol;Acc:HGNC:17074]
ENSG00000004142.11	POLDIP2	protein_coding	4298.4	-0.814425	8.20113e-05	0.000698775	167.465	DNA polymerase delta interacting protein 2 [Source:HGNC Symbol;Acc:HGNC:23781]
ENSG00000004478.7	FKBP4	protein_coding	22949.5	-1.27526	3.54991e-09	1.01382e-07	430.133	FK506 binding protein 4 [Source:HGNC Symbol;Acc:HGNC:3720]
ENSG00000004700.15	RECQL	protein_coding	1608.17	-1.27445	2.40786e-08	5.52876e-07	42.2908	RecQ like helicase [Source:HGNC Symbol;Acc:HGNC:9948]
ENSG00000004766.15	VPS50	protein_coding	2202.97	-0.593036	0.00552318	0.0236537	23.3269	VPS50, EARP/GARPII complex subunit [Source:HGNC Symbol;Acc:HGNC:25956]
ENSG00000004779.9	NDUFAB1	protein_coding	3510.93	-0.804857	0.000141191	0.00111826	184.539	NADH:ubiquinone oxidoreductase subunit AB1 [Source:HGNC Symbol;Acc:HGNC:7694]
ENSG00000004864.13	SLC25A13	protein_coding	1645.85	-0.874664	0.000169128	0.00129904	38.0275	solute carrier family 25 member 13 [Source:HGNC Symbol;Acc:HGNC:10983]
ENSG00000004866.18	ST7	protein_coding	655.006	-1.0383	0.000157115	0.00122358	8.8095	suppression of tumorigenicity 7 [Source:HGNC Symbol;Acc:HGNC:11351]
ENSG00000005022.5	SLC25A5	protein_coding	12995.8	-0.790481	0.000291307	0.00204847	741.634	solute carrier family 25 member 5 [Source:HGNC Symbol;Acc:HGNC:10991]
ENSG00000005059.15	CCDC109B	protein_coding	819.063	-0.816368	0.00373583	0.0173131	19.6526	mitochondrial calcium uniporter dominant negative beta subunit [Source:HGNC Symbol;Acc:HGNC:26076]
ENSG00000005187.11	ACSM3	protein_coding	181.213	1.29674	0.00013172	0.00105349	2.12651	acyl-CoA synthetase medium chain family member 3 [Source:HGNC Symbol;Acc:HGNC:10522]
ENSG00000005189.19	AC004381.6	protein_coding	929.24	-1.00979	0.000493899	0.00320151	22.3011	RNA exonuclease 5 [Source:HGNC Symbol;Acc:HGNC:24661]
ENSG00000005194.14	CIAPIN1	protein_coding	1040.45	-0.624592	0.0110585	0.0411914	25.8219	cytokine induced apoptosis inhibitor 1 [Source:HGNC Symbol;Acc:HGNC:28050]
ENSG00000005238.19	FAM214B	protein_coding	828.339	1.38105	5.38217e-06	6.60134e-05	12.8621	family with sequence similarity 214 member B [Source:HGNC Symbol;Acc:HGNC:25666]
ENSG00000005436.13	GCFC2	protein_coding	689.827	-0.840879	0.000796724	0.00479741	10.697	GC-rich sequence DNA-binding factor 2 [Source:HGNC Symbol;Acc:HGNC:1317]
ENSG00000005448.16	WDR54	protein_coding	2808.31	1.35179	7.02564e-08	1.42947e-06	91.5956	WD repeat domain 54 [Source:HGNC Symbol;Acc:HGNC:25770]
ENSG00000005483.19	KMT2E	protein_coding	12243.8	0.880225	3.01434e-05	0.000294501	111.182	lysine methyltransferase 2E [Source:HGNC Symbol;Acc:HGNC:18541]
ENSG00000005486.16	RHBDD2	protein_coding	2260.03	-0.972528	0.000492104	0.00319093	84.0531	rhomboid domain containing 2 [Source:HGNC Symbol;Acc:HGNC:23082]
ENSG00000005882.11	PDK2	protein_coding	1526.58	-0.781095	0.00122559	0.00687587	25.2487	pyruvate dehydrogenase kinase 2 [Source:HGNC Symbol;Acc:HGNC:8810]
ENSG00000006015.17	C19orf60	protein_coding	768.143	-1.03596	8.2387e-05	0.000701365	22.8362	required for excision 1-B domain containing [Source:HGNC Symbol;Acc:HGNC:26098]
ENSG00000006071.11	ABCC8	protein_coding	129.233	-1.15798	0.00154389	0.00836651	1.9469	ATP binding cassette subfamily C member 8 [Source:HGNC Symbol;Acc:HGNC:59]
ENSG00000006432.15	MAP3K9	protein_coding	3308.62	0.79906	0.00094219	0.00551815	24.5045	mitogen-activated protein kinase kinase kinase 9 [Source:HGNC Symbol;Acc:HGNC:6861]
ENSG00000006453.13	BAIAP2L1	protein_coding	1733.99	1.4142	6.41465e-10	2.21322e-08	31.0711	BAI1 associated protein 2 like 1 [Source:HGNC Symbol;Acc:HGNC:21649]
ENSG00000006459.10	KDM7A	protein_coding	5758.29	1.37913	9.62446e-09	2.4389e-07	55.5926	lysine demethylase 7A [Source:HGNC Symbol;Acc:HGNC:22224]
ENSG00000006530.15	AGK	protein_coding	1264.79	-1.15425	1.4505e-06	2.10975e-05	19.0352	acylglycerol kinase [Source:HGNC Symbol;Acc:HGNC:21869]
ENSG00000006534.15	ALDH3B1	protein_coding	472.626	1.18465	0.00117161	0.00662241	7.6579	aldehyde dehydrogenase 3 family member B1 [Source:HGNC Symbol;Acc:HGNC:410]
ENSG00000006625.17	GGCT	protein_coding	2006.51	-0.923647	4.75167e-05	0.000438476	115.705	gamma-glutamylcyclotransferase [Source:HGNC Symbol;Acc:HGNC:21705]
ENSG00000006704.10	GTF2IRD1	protein_coding	3371.86	1.13377	1.61935e-07	2.9983e-06	41.9155	GTF2I repeat domain containing 1 [Source:HGNC Symbol;Acc:HGNC:4661]
ENSG00000006740.16	ARHGAP44	protein_coding	1759.82	1.3685	4.52836e-10	1.62753e-08	17.4143	Rho GTPase activating protein 44 [Source:HGNC Symbol;Acc:HGNC:29096]
ENSG00000006744.18	ELAC2	protein_coding	3428.01	-0.917097	0.000329824	0.00227837	51.232	elaC ribonuclease Z 2 [Source:HGNC Symbol;Acc:HGNC:14198]
ENSG00000006756.15	ARSD	protein_coding	5290.19	-1.14411	9.09532e-08	1.79006e-06	71.9854	arylsulfatase D [Source:HGNC Symbol;Acc:HGNC:717]
ENSG00000007047.14	MARK4	protein_coding	2088.49	1.75285	1.46924e-11	7.11503e-10	31.5975	microtubule affinity regulating kinase 4 [Source:HGNC Symbol;Acc:HGNC:13538]
ENSG00000007202.14	KIAA0100	protein_coding	18471	-0.679381	0.0049665	0.0217357	162.262	KIAA0100 [Source:HGNC Symbol;Acc:HGNC:28960]
ENSG00000007255.10	TRAPPC6A	protein_coding	1159.96	-0.663937	0.004451	0.0199165	102.054	trafficking protein particle complex 6A [Source:HGNC Symbol;Acc:HGNC:23069]
ENSG00000007341.18	ST7L	protein_coding	849.22	-0.884823	0.000420956	0.00279917	9.85708	suppression of tumorigenicity 7 like [Source:HGNC Symbol;Acc:HGNC:18441]
ENSG00000007541.15	PIGQ	protein_coding	742.91	-1.29595	1.82093e-06	2.56095e-05	10.8625	phosphatidylinositol glycan anchor biosynthesis class Q [Source:HGNC Symbol;Acc:HGNC:14135]
ENSG00000007968.6	E2F2	protein_coding	749.037	-2.84606	2.16445e-12	1.24016e-10	17.6048	E2F transcription factor 2 [Source:HGNC Symbol;Acc:HGNC:3114]
ENSG00000008256.15	CYTH3	protein_coding	1315.88	0.854579	0.000771897	0.00466357	17.6753	cytohesin 3 [Source:HGNC Symbol;Acc:HGNC:9504]
ENSG00000008277.14	ADAM22	protein_coding	951.859	-0.950396	0.000912608	0.00537751	7.04525	ADAM metallopeptidase domain 22 [Source:HGNC Symbol;Acc:HGNC:201]
ENSG00000008283.15	CYB561	protein_coding	11646.7	-0.758587	0.00178379	0.00945187	199.87	cytochrome b561 [Source:HGNC Symbol;Acc:HGNC:2571]
ENSG00000008294.20	SPAG9	protein_coding	21116.3	0.974189	5.7341e-05	0.000515278	152.189	sperm associated antigen 9 [Source:HGNC Symbol;Acc:HGNC:14524]
ENSG00000008382.15	MPND	protein_coding	678.348	-0.683341	0.00647352	0.0268251	28.4537	MPN domain containing [Source:HGNC Symbol;Acc:HGNC:25934]
ENSG00000008405.11	CRY1	protein_coding	1015.69	-0.853761	0.00521036	0.022594	17.0865	cryptochrome circadian regulator 1 [Source:HGNC Symbol;Acc:HGNC:2384]
ENSG00000008513.14	ST3GAL1	protein_coding	5570.26	1.61427	3.95504e-15	3.34945e-13	61.3099	ST3 beta-galactoside alpha-2,3-sialyltransferase 1 [Source:HGNC Symbol;Acc:HGNC:10862]
ENSG00000008710.17	PKD1	protein_coding	4786.62	0.688083	0.00263396	0.012963	19.3934	polycystin 1, transient receptor potential channel interacting [Source:HGNC Symbol;Acc:HGNC:9008]
ENSG00000009307.15	CSDE1	protein_coding	287484	0.725035	0.000785229	0.0047368	3667.91	cold shock domain containing E1 [Source:HGNC Symbol;Acc:HGNC:29905]
ENSG00000009780.15	FAM76A	protein_coding	643.094	-0.909639	0.000617642	0.00386283	14.0718	family with sequence similarity 76 member A [Source:HGNC Symbol;Acc:HGNC:28530]
ENSG00000010072.15	SPRTN	protein_coding	885.244	-1.43031	3.23404e-07	5.6138e-06	15.2083	SprT-like N-terminal domain [Source:HGNC Symbol;Acc:HGNC:25356]
ENSG00000010278.11	CD9	protein_coding	16292.6	-0.620517	0.00576947	0.0244649	433.654	CD9 molecule [Source:HGNC Symbol;Acc:HGNC:1709]
ENSG00000010310.8	GIPR	protein_coding	131.303	2.08872	2.16379e-07	3.91584e-06	2.74016	gastric inhibitory polypeptide receptor [Source:HGNC Symbol;Acc:HGNC:4271]
ENSG00000010361.13	FUZ	protein_coding	595.865	-1.2573	1.85645e-05	0.000194212	18.992	fuzzy planar cell polarity protein [Source:HGNC Symbol;Acc:HGNC:26219]
ENSG00000010404.17	IDS	protein_coding	3384.43	1.09775	1.64599e-05	0.000175002	32.6508	iduronate 2-sulfatase [Source:HGNC Symbol;Acc:HGNC:5389]
ENSG00000010810.17	FYN	protein_coding	96.963	1.2108	0.0090411	0.0349192	1.46267	FYN proto-oncogene, Src family tyrosine kinase [Source:HGNC Symbol;Acc:HGNC:4037]
ENSG00000010818.8	HIVEP2	protein_coding	3319.05	1.2024	1.60178e-08	3.85906e-07	29.412	human immunodeficiency virus type I enhancer binding protein 2 [Source:HGNC Symbol;Acc:HGNC:4921]
ENSG00000011028.13	MRC2	protein_coding	1797.89	1.66456	8.52169e-14	6.04021e-12	24.7858	mannose receptor C type 2 [Source:HGNC Symbol;Acc:HGNC:16875]
ENSG00000011105.11	TSPAN9	protein_coding	759.103	-1.0303	5.60149e-05	0.000504986	12.6644	tetraspanin 9 [Source:HGNC Symbol;Acc:HGNC:21640]
ENSG00000011143.16	MKS1	protein_coding	1937.86	-1.26461	5.89119e-09	1.58092e-07	44.9248	Meckel syndrome, type 1 [Source:HGNC Symbol;Acc:HGNC:7121]
ENSG00000011198.7	ABHD5	protein_coding	826.27	-0.968763	0.000609087	0.00382117	24.1557	abhydrolase domain containing 5 [Source:HGNC Symbol;Acc:HGNC:21396]
ENSG00000011258.15	MBTD1	protein_coding	7058.79	0.604931	0.00537871	0.0231566	81.0457	mbt domain containing 1 [Source:HGNC Symbol;Acc:HGNC:19866]
ENSG00000011295.15	TTC19	protein_coding	2607.61	-0.64857	0.00522748	0.0226325	37.521	tetratricopeptide repeat domain 19 [Source:HGNC Symbol;Acc:HGNC:26006]
ENSG00000011332.19	DPF1	protein_coding	62.7908	-1.62504	0.00690907	0.0282885	1.83674	double PHD fingers 1 [Source:HGNC Symbol;Acc:HGNC:20225]
ENSG00000011376.9	LARS2	protein_coding	907.435	-1.06777	7.74234e-06	9.02642e-05	15.7888	leucyl-tRNA synthetase 2, mitochondrial [Source:HGNC Symbol;Acc:HGNC:17095]
ENSG00000011405.13	PIK3C2A	protein_coding	8421.81	0.668662	0.00108938	0.00624607	69.0457	phosphatidylinositol-4-phosphate 3-kinase catalytic subunit type 2 alpha [Source:HGNC Symbol;Acc:HGNC:8971]
ENSG00000011422.11	PLAUR	protein_coding	288.59	1.69627	2.50884e-06	3.38953e-05	6.94686	plasminogen activator, urokinase receptor [Source:HGNC Symbol;Acc:HGNC:9053]
ENSG00000011478.11	QPCTL	protein_coding	921.708	0.788255	0.00320159	0.0152725	31.565	glutaminyl-peptide cyclotransferase like [Source:HGNC Symbol;Acc:HGNC:25952]
ENSG00000011485.14	PPP5C	protein_coding	2749.15	-0.686924	0.00222611	0.0112852	31.264	protein phosphatase 5 catalytic subunit [Source:HGNC Symbol;Acc:HGNC:9322]
ENSG00000011638.10	TMEM159	protein_coding	3155.77	1.29458	6.00816e-09	1.6079e-07	104.747	transmembrane protein 159 [Source:HGNC Symbol;Acc:HGNC:30136]
ENSG00000012048.20	BRCA1	protein_coding	3556.41	-1.58297	3.8201e-10	1.40211e-08	44.2248	BRCA1, DNA repair associated [Source:HGNC Symbol;Acc:HGNC:1100]
ENSG00000012171.17	SEMA3B	protein_coding	2440.4	0.808733	0.00376525	0.0174136	35.7717	semaphorin 3B [Source:HGNC Symbol;Acc:HGNC:10724]
ENSG00000012211.12	PRICKLE3	protein_coding	621.163	1.34381	4.80447e-06	5.97519e-05	18.1199	prickle planar cell polarity protein 3 [Source:HGNC Symbol;Acc:HGNC:6645]
ENSG00000012660.13	ELOVL5	protein_coding	3271.81	-0.685324	0.013823	0.0493466	81.8114	ELOVL fatty acid elongase 5 [Source:HGNC Symbol;Acc:HGNC:21308]
ENSG00000012779.10	ALOX5	protein_coding	46.4426	4.20502	1.68659e-09	5.22895e-08	1.47817	arachidonate 5-lipoxygenase [Source:HGNC Symbol;Acc:HGNC:435]
ENSG00000012822.15	CALCOCO1	protein_coding	6467.8	0.750617	0.000430379	0.0028531	60.7942	calcium binding and coiled-coil domain 1 [Source:HGNC Symbol;Acc:HGNC:29306]
ENSG00000012963.13	UBR7	protein_coding	3902.92	-0.998053	6.00746e-05	0.000536394	95.2531	ubiquitin protein ligase E3 component n-recognin 7 (putative) [Source:HGNC Symbol;Acc:HGNC:20344]
ENSG00000013275.7	PSMC4	protein_coding	5400.69	-0.826468	0.000646828	0.0040082	189.249	proteasome 26S subunit, ATPase 4 [Source:HGNC Symbol;Acc:HGNC:9551]
ENSG00000013288.8	MAN2B2	protein_coding	1732.95	-1.16875	1.03265e-05	0.000116504	19.1708	mannosidase alpha class 2B member 2 [Source:HGNC Symbol;Acc:HGNC:29623]
ENSG00000013306.15	SLC25A39	protein_coding	5411.3	-1.19532	7.6652e-08	1.53642e-06	142.005	solute carrier family 25 member 39 [Source:HGNC Symbol;Acc:HGNC:24279]
ENSG00000013441.15	CLK1	protein_coding	10151.7	0.821339	0.000676608	0.00416242	160.419	CDC like kinase 1 [Source:HGNC Symbol;Acc:HGNC:2068]
ENSG00000013503.9	POLR3B	protein_coding	755.022	-1.8163	2.24306e-08	5.19916e-07	18.1832	RNA polymerase III subunit B [Source:HGNC Symbol;Acc:HGNC:30348]
ENSG00000013523.9	ANGEL1	protein_coding	2094.09	-0.895353	5.78208e-05	0.000519113	29.3975	angel homolog 1 [Source:HGNC Symbol;Acc:HGNC:19961]
ENSG00000013573.16	DDX11	protein_coding	1663.07	-0.722888	0.00309531	0.0148488	17.3886	DEAD/H-box helicase 11 [Source:HGNC Symbol;Acc:HGNC:2736]
ENSG00000014138.8	POLA2	protein_coding	1681.12	-1.50678	1.44242e-08	3.49666e-07	32.2742	DNA polymerase alpha 2, accessory subunit [Source:HGNC Symbol;Acc:HGNC:30073]
ENSG00000014914.19	MTMR11	protein_coding	999.587	0.996877	0.000400265	0.00267889	18.49	myotubularin related protein 11 [Source:HGNC Symbol;Acc:HGNC:24307]
ENSG00000017260.19	ATP2C1	protein_coding	5459.44	0.750713	0.00090738	0.00535509	49.0324	ATPase secretory pathway Ca2+ transporting 1 [Source:HGNC Symbol;Acc:HGNC:13211]
ENSG00000019485.12	PRDM11	protein_coding	174.459	-2.00934	3.40697e-08	7.53114e-07	4.05416	PR/SET domain 11 [Source:HGNC Symbol;Acc:HGNC:13996]
ENSG00000019995.6	ZRANB1	protein_coding	4739.05	0.664805	0.00421212	0.0190613	57.246	zinc finger RANBP2-type containing 1 [Source:HGNC Symbol;Acc:HGNC:18224]
ENSG00000020129.15	NCDN	protein_coding	1234.06	-1.60571	6.54174e-07	1.0447e-05	28.7232	neurochondrin [Source:HGNC Symbol;Acc:HGNC:17597]
ENSG00000020181.17	ADGRA2	protein_coding	218.084	-0.768841	0.0137878	0.0492658	2.62188	adhesion G protein-coupled receptor A2 [Source:HGNC Symbol;Acc:HGNC:17849]
ENSG00000020577.13	SAMD4A	protein_coding	1692.87	1.60865	4.19123e-08	9.10023e-07	14.2867	sterile alpha motif domain containing 4A [Source:HGNC Symbol;Acc:HGNC:23023]
ENSG00000021300.13	PLEKHB1	protein_coding	1175.05	-1.13974	0.0012163	0.00683553	22.9555	pleckstrin homology domain containing B1 [Source:HGNC Symbol;Acc:HGNC:19079]
ENSG00000021776.10	AQR	protein_coding	5728.17	-0.672103	0.00131409	0.00730951	34.614	aquarius intron-binding spliceosomal factor [Source:HGNC Symbol;Acc:HGNC:29513]
ENSG00000023228.13	NDUFS1	protein_coding	9004.25	-0.901394	9.9348e-06	0.000112474	62.7281	NADH:ubiquinone oxidoreductase core subunit S1 [Source:HGNC Symbol;Acc:HGNC:7707]
ENSG00000023572.8	GLRX2	protein_coding	645.01	-0.903006	0.000823235	0.00493417	47.8356	glutaredoxin 2 [Source:HGNC Symbol;Acc:HGNC:16065]
ENSG00000023608.4	SNAPC1	protein_coding	1067.5	1.09221	5.14714e-06	6.3449e-05	33.3799	small nuclear RNA activating complex polypeptide 1 [Source:HGNC Symbol;Acc:HGNC:11134]
ENSG00000023697.12	DERA	protein_coding	795.686	-0.93812	6.83425e-05	0.000596069	24.3198	deoxyribose-phosphate aldolase [Source:HGNC Symbol;Acc:HGNC:24269]
ENSG00000023902.13	PLEKHO1	protein_coding	482.89	1.36342	2.58997e-05	0.000258245	6.31996	pleckstrin homology domain containing O1 [Source:HGNC Symbol;Acc:HGNC:24310]
ENSG00000024422.11	EHD2	protein_coding	1181.54	2.66794	1.65206e-16	1.6833e-14	34.6665	EH domain containing 2 [Source:HGNC Symbol;Acc:HGNC:3243]
ENSG00000024862.16	CCDC28A	protein_coding	679.165	0.99224	0.00097468	0.00567153	41.6431	coiled-coil domain containing 28A [Source:HGNC Symbol;Acc:HGNC:21098]
ENSG00000025039.14	RRAGD	protein_coding	2276.74	3.98252	1.59636e-27	4.80457e-25	68.4394	Ras related GTP binding D [Source:HGNC Symbol;Acc:HGNC:19903]
ENSG00000025770.18	NCAPH2	protein_coding	1328.44	-0.674397	0.00290184	0.01409	34.2106	non-SMC condensin II complex subunit H2 [Source:HGNC Symbol;Acc:HGNC:25071]
ENSG00000025772.7	TOMM34	protein_coding	1051.34	-0.649567	0.00705959	0.0287782	43.1148	translocase of outer mitochondrial membrane 34 [Source:HGNC Symbol;Acc:HGNC:15746]
ENSG00000025796.13	SEC63	protein_coding	2773.35	0.849082	0.000388603	0.00261425	25.8638	SEC63 homolog, protein translocation regulator [Source:HGNC Symbol;Acc:HGNC:21082]
ENSG00000026297.15	RNASET2	protein_coding	2298.43	0.767847	0.000470194	0.00306921	23.2333	ribonuclease T2 [Source:HGNC Symbol;Acc:HGNC:21686]
ENSG00000027001.9	MIPEP	protein_coding	1018.1	-0.83718	0.00042138	0.00280104	25.335	mitochondrial intermediate peptidase [Source:HGNC Symbol;Acc:HGNC:7104]
ENSG00000027847.13	B4GALT7	protein_coding	766.282	-0.800701	0.00290989	0.0141186	13.6225	beta-1,4-galactosyltransferase 7 [Source:HGNC Symbol;Acc:HGNC:930]
ENSG00000028116.16	VRK2	protein_coding	1144.17	-0.590212	0.0108052	0.0404097	27.4112	vaccinia related kinase 2 [Source:HGNC Symbol;Acc:HGNC:12719]
ENSG00000029153.14	ARNTL2	protein_coding	713.09	-1.75436	6.70458e-12	3.41567e-10	11.1817	aryl hydrocarbon receptor nuclear translocator like 2 [Source:HGNC Symbol;Acc:HGNC:18984]
ENSG00000030110.12	BAK1	protein_coding	479.868	-0.696548	0.00887652	0.034429	19.7854	BCL2 antagonist/killer 1 [Source:HGNC Symbol;Acc:HGNC:949]
ENSG00000032219.18	ARID4A	protein_coding	4606.13	0.668507	0.00152294	0.00826818	47.7337	AT-rich interaction domain 4A [Source:HGNC Symbol;Acc:HGNC:9885]
ENSG00000033011.11	ALG1	protein_coding	883.944	-1.03052	1.54935e-05	0.000165718	17.4189	ALG1, chitobiosyldiphosphodolichol beta-mannosyltransferase [Source:HGNC Symbol;Acc:HGNC:18294]
ENSG00000033050.7	ABCF2	protein_coding	2324.02	-1.28647	1.96898e-05	0.000204672	50.1916	ATP binding cassette subfamily F member 2 [Source:HGNC Symbol;Acc:HGNC:71]
ENSG00000034510.5	TMSB10	protein_coding	54863.5	1.98396	9.75896e-14	6.84281e-12	11215.4	thymosin beta 10 [Source:HGNC Symbol;Acc:HGNC:11879]
ENSG00000034533.11	ASTE1	protein_coding	733.517	-0.744776	0.00178582	0.00946005	17.4163	asteroid homolog 1 [Source:HGNC Symbol;Acc:HGNC:25021]
ENSG00000034677.11	RNF19A	protein_coding	8827.58	0.887618	4.07458e-05	0.000383091	114.253	ring finger protein 19A, RBR E3 ubiquitin protein ligase [Source:HGNC Symbol;Acc:HGNC:13432]
ENSG00000034693.14	PEX3	protein_coding	1025.74	0.853549	0.000271222	0.00193364	35.0181	peroxisomal biogenesis factor 3 [Source:HGNC Symbol;Acc:HGNC:8858]
ENSG00000035115.21	SH3YL1	protein_coding	5382.48	0.915931	2.31528e-05	0.000233956	37.5072	SH3 and SYLF domain containing 1 [Source:HGNC Symbol;Acc:HGNC:29546]
ENSG00000035664.11	DAPK2	protein_coding	2182.74	3.7218	1.80904e-52	2.08177e-49	18.1512	death associated protein kinase 2 [Source:HGNC Symbol;Acc:HGNC:2675]
ENSG00000035862.12	TIMP2	protein_coding	1792.85	1.17782	3.27304e-05	0.000316982	28.8984	TIMP metallopeptidase inhibitor 2 [Source:HGNC Symbol;Acc:HGNC:11821]
ENSG00000037474.14	NSUN2	protein_coding	3777.15	-0.799697	0.000436663	0.00288012	57.8811	NOP2/Sun RNA methyltransferase family member 2 [Source:HGNC Symbol;Acc:HGNC:25994]
ENSG00000037637.10	FBXO42	protein_coding	3049.42	0.865372	0.00014257	0.00112691	26.7735	F-box protein 42 [Source:HGNC Symbol;Acc:HGNC:29249]
ENSG00000037897.16	METTL1	protein_coding	430.741	-2.04198	7.05538e-13	4.40972e-11	18.5982	methyltransferase like 1 [Source:HGNC Symbol;Acc:HGNC:7030]
ENSG00000038002.8	AGA	protein_coding	591.63	-1.01794	0.000234225	0.00171231	22.2687	aspartylglucosaminidase [Source:HGNC Symbol;Acc:HGNC:318]
ENSG00000038382.17	TRIO	protein_coding	8711.4	0.726021	0.000358502	0.00244113	38.395	trio Rho guanine nucleotide exchange factor [Source:HGNC Symbol;Acc:HGNC:12303]
ENSG00000039068.18	CDH1	protein_coding	50014.3	-0.676219	0.00500168	0.0218557	671.477	cadherin 1 [Source:HGNC Symbol;Acc:HGNC:1748]
ENSG00000039650.9	PNKP	protein_coding	1366.18	-1.07836	3.91577e-05	0.000370427	30.1798	polynucleotide kinase 3'-phosphatase [Source:HGNC Symbol;Acc:HGNC:9154]
ENSG00000040531.14	CTNS	protein_coding	536.93	-0.742204	0.0131777	0.0475199	13.8265	cystinosin, lysosomal cystine transporter [Source:HGNC Symbol;Acc:HGNC:2518]
ENSG00000041357.15	PSMA4	protein_coding	10720.7	-0.852177	0.000119199	0.00097	128.621	proteasome subunit alpha 4 [Source:HGNC Symbol;Acc:HGNC:9533]
ENSG00000041802.10	LSG1	protein_coding	4736.85	-0.816096	0.000151848	0.00119014	81.7541	large 60S subunit nuclear export GTPase 1 [Source:HGNC Symbol;Acc:HGNC:25652]
ENSG00000042286.14	AIFM2	protein_coding	585.992	0.792396	0.00236944	0.0118642	9.10502	apoptosis inducing factor, mitochondria associated 2 [Source:HGNC Symbol;Acc:HGNC:21411]
ENSG00000042317.16	SPATA7	protein_coding	735.58	0.710688	0.0057221	0.0243044	8.15894	spermatogenesis associated 7 [Source:HGNC Symbol;Acc:HGNC:20423]
ENSG00000042493.15	CAPG	protein_coding	1565.27	0.843247	0.00837352	0.0328542	57.6383	capping actin protein, gelsolin like [Source:HGNC Symbol;Acc:HGNC:1474]
ENSG00000043355.10	ZIC2	protein_coding	302.513	0.878417	0.00239742	0.0119828	7.80133	Zic family member 2 [Source:HGNC Symbol;Acc:HGNC:12873]
ENSG00000046604.12	DSG2	protein_coding	3007.47	1.19751	1.89617e-05	0.000197839	44.5648	desmoglein 2 [Source:HGNC Symbol;Acc:HGNC:3049]
ENSG00000047188.15	YTHDC2	protein_coding	1949.73	-1.00824	6.35106e-06	7.59448e-05	16.517	YTH domain containing 2 [Source:HGNC Symbol;Acc:HGNC:24721]
ENSG00000047457.13	CP	protein_coding	93.6217	2.92858	1.09329e-11	5.37387e-10	1.5609	ceruloplasmin [Source:HGNC Symbol;Acc:HGNC:2295]
ENSG00000047597.5	XK	protein_coding	121.372	-1.46347	9.78528e-05	0.000817376	2.52405	X-linked Kx blood group [Source:HGNC Symbol;Acc:HGNC:12811]
ENSG00000047621.11	C12orf4	protein_coding	589.752	-1.06251	4.46891e-05	0.000415125	11.1504	chromosome 12 open reading frame 4 [Source:HGNC Symbol;Acc:HGNC:1184]
ENSG00000047849.21	MAP4	protein_coding	9377.98	0.734882	0.00317811	0.0151902	51.346	microtubule associated protein 4 [Source:HGNC Symbol;Acc:HGNC:6862]
ENSG00000048028.11	USP28	protein_coding	2256.05	0.970153	2.82838e-05	0.000278889	32.0477	ubiquitin specific peptidase 28 [Source:HGNC Symbol;Acc:HGNC:12625]
ENSG00000048140.17	TSPAN17	protein_coding	1775.12	-1.15763	8.30099e-05	0.000706361	35.153	tetraspanin 17 [Source:HGNC Symbol;Acc:HGNC:13594]
ENSG00000048162.19	NOP16	protein_coding	725.071	-0.93853	0.000147832	0.00116193	21.9028	NOP16 nucleolar protein [Source:HGNC Symbol;Acc:HGNC:26934]
ENSG00000048392.11	RRM2B	protein_coding	11134.3	0.675856	0.00753114	0.0302405	162.763	ribonucleotide reductase regulatory TP53 inducible subunit M2B [Source:HGNC Symbol;Acc:HGNC:17296]
ENSG00000048471.13	SNX29	protein_coding	2415.24	-0.700331	0.00364158	0.0169666	17.5854	sorting nexin 29 [Source:HGNC Symbol;Acc:HGNC:30542]
ENSG00000048649.13	RSF1	protein_coding	10638.8	0.833569	7.95793e-05	0.000681317	51.1098	remodeling and spacing factor 1 [Source:HGNC Symbol;Acc:HGNC:18118]
ENSG00000049130.13	KITLG	protein_coding	4559.95	-1.34145	1.10678e-08	2.76878e-07	77.5095	KIT ligand [Source:HGNC Symbol;Acc:HGNC:6343]
ENSG00000049167.13	ERCC8	protein_coding	456.191	-0.842654	0.00622527	0.0259836	8.80126	ERCC excision repair 8, CSA ubiquitin ligase complex subunit [Source:HGNC Symbol;Acc:HGNC:3439]
ENSG00000049323.15	LTBP1	protein_coding	2400.05	-0.800773	0.000160434	0.001243	27.1349	latent transforming growth factor beta binding protein 1 [Source:HGNC Symbol;Acc:HGNC:6714]
ENSG00000049449.8	RCN1	protein_coding	396.184	0.793064	0.00510148	0.0222074	4.54544	reticulocalbin 1 [Source:HGNC Symbol;Acc:HGNC:9934]
ENSG00000049541.10	RFC2	protein_coding	2002.17	-1.28927	5.32801e-09	1.4517e-07	89.0766	replication factor C subunit 2 [Source:HGNC Symbol;Acc:HGNC:9970]
ENSG00000049656.13	CLPTM1L	protein_coding	3512.77	-1.14383	3.19774e-06	4.19848e-05	51.9697	CLPTM1 like [Source:HGNC Symbol;Acc:HGNC:24308]
ENSG00000049759.16	NEDD4L	protein_coding	2930.67	0.648258	0.00214024	0.0109606	13.6128	neural precursor cell expressed, developmentally down-regulated 4-like, E3 ubiquitin protein ligase [Source:HGNC Symbol;Acc:HGNC:7728]
ENSG00000049883.14	PTCD2	protein_coding	1052.32	-0.653149	0.012675	0.0460297	7.07063	pentatricopeptide repeat domain 2 [Source:HGNC Symbol;Acc:HGNC:25734]
ENSG00000050405.13	LIMA1	protein_coding	3581.87	0.768263	0.000548313	0.00349402	48.7492	LIM domain and actin binding 1 [Source:HGNC Symbol;Acc:HGNC:24636]
ENSG00000050426.15	LETMD1	protein_coding	4858.86	0.718832	0.00128789	0.00718627	61.069	LETM1 domain containing 1 [Source:HGNC Symbol;Acc:HGNC:24241]
ENSG00000051128.18	HOMER3	protein_coding	808.541	1.63101	1.55023e-07	2.88555e-06	29.5047	homer scaffolding protein 3 [Source:HGNC Symbol;Acc:HGNC:17514]
ENSG00000051180.16	RAD51	protein_coding	428.375	-1.54696	1.14642e-08	2.86065e-07	13.7064	RAD51 recombinase [Source:HGNC Symbol;Acc:HGNC:9817]
ENSG00000051596.9	THOC3	protein_coding	669.895	-0.644856	0.0083646	0.0328325	16.3506	THO complex 3 [Source:HGNC Symbol;Acc:HGNC:19072]
ENSG00000051825.14	MPHOSPH9	protein_coding	5078.76	-0.596665	0.00492319	0.0215947	40.7797	M-phase phosphoprotein 9 [Source:HGNC Symbol;Acc:HGNC:7215]
ENSG00000052749.13	RRP12	protein_coding	1135.06	-1.28953	1.58354e-08	3.81984e-07	12.3389	ribosomal RNA processing 12 homolog [Source:HGNC Symbol;Acc:HGNC:29100]
ENSG00000052802.12	MSMO1	protein_coding	4764.53	1.13829	7.02354e-05	0.000611489	138.835	methylsterol monooxygenase 1 [Source:HGNC Symbol;Acc:HGNC:10545]
ENSG00000053254.15	FOXN3	protein_coding	7588.35	2.41757	2.86741e-24	5.84325e-22	72.571	forkhead box N3 [Source:HGNC Symbol;Acc:HGNC:1928]
ENSG00000053372.4	MRTO4	protein_coding	1614.14	-1.11342	7.68547e-07	1.20376e-05	54.2996	MRT4 homolog, ribosome maturation factor [Source:HGNC Symbol;Acc:HGNC:18477]
ENSG00000054179.11	ENTPD2	protein_coding	292.182	0.875491	0.00867723	0.0337816	9.06197	ectonucleoside triphosphate diphosphohydrolase 2 [Source:HGNC Symbol;Acc:HGNC:3364]
ENSG00000054277.12	OPN3	protein_coding	1419.18	1.07691	1.62849e-06	2.32882e-05	34.0482	opsin 3 [Source:HGNC Symbol;Acc:HGNC:14007]
ENSG00000054392.12	HHAT	protein_coding	325.622	-0.915749	0.00156419	0.00845778	7.77791	hedgehog acyltransferase [Source:HGNC Symbol;Acc:HGNC:18270]
ENSG00000054611.13	TBC1D22A	protein_coding	1168.75	1.12517	7.98745e-06	9.27901e-05	19.165	TBC1 domain family member 22A [Source:HGNC Symbol;Acc:HGNC:1309]
ENSG00000054965.10	FAM168A	protein_coding	11827.9	0.901401	5.86413e-05	0.000524794	120.615	family with sequence similarity 168 member A [Source:HGNC Symbol;Acc:HGNC:28999]
ENSG00000054967.12	RELT	protein_coding	1141.26	1.50491	1.10182e-06	1.6587e-05	17.8952	RELT, TNF receptor [Source:HGNC Symbol;Acc:HGNC:13764]
ENSG00000054983.16	GALC	protein_coding	1771	-0.942434	2.86389e-05	0.000281822	22.7352	galactosylceramidase [Source:HGNC Symbol;Acc:HGNC:4115]
ENSG00000055044.10	NOP58	protein_coding	4655.72	-0.762145	0.000251939	0.00182204	116.005	NOP58 ribonucleoprotein [Source:HGNC Symbol;Acc:HGNC:29926]
ENSG00000055147.17	FAM114A2	protein_coding	1155.94	-0.588838	0.00960421	0.0367039	14.1351	family with sequence similarity 114 member A2 [Source:HGNC Symbol;Acc:HGNC:1333]
ENSG00000055163.18	CYFIP2	protein_coding	2002.76	1.34133	1.59446e-09	4.9908e-08	16.3605	cytoplasmic FMR1 interacting protein 2 [Source:HGNC Symbol;Acc:HGNC:13760]
ENSG00000055208.17	TAB2	protein_coding	6672.87	0.929068	1.00725e-05	0.0001139	102.026	TGF-beta activated kinase 1/MAP3K7 binding protein 2 [Source:HGNC Symbol;Acc:HGNC:17075]
ENSG00000055609.17	KMT2C	protein_coding	24315.7	0.788679	8.78428e-05	0.000743604	95.6334	lysine methyltransferase 2C [Source:HGNC Symbol;Acc:HGNC:13726]
ENSG00000055813.5	CCDC85A	protein_coding	207.117	0.965644	0.00451473	0.0201234	4.22413	coiled-coil domain containing 85A [Source:HGNC Symbol;Acc:HGNC:29400]
ENSG00000056050.6	C4orf27	protein_coding	448.635	-1.17275	8.65714e-06	9.94478e-05	29.0784	histone PARylation factor 1 [Source:HGNC Symbol;Acc:HGNC:26051]
ENSG00000056558.10	TRAF1	protein_coding	65.0251	-1.26926	0.0101384	0.0384375	1.16026	TNF receptor associated factor 1 [Source:HGNC Symbol;Acc:HGNC:12031]
ENSG00000057252.12	SOAT1	protein_coding	1183.76	-0.879058	0.00319875	0.0152664	14.6656	sterol O-acyltransferase 1 [Source:HGNC Symbol;Acc:HGNC:11177]
ENSG00000057757.9	PITHD1	protein_coding	1519.3	-0.629331	0.0069927	0.028577	58.9085	PITH domain containing 1 [Source:HGNC Symbol;Acc:HGNC:25022]
ENSG00000058085.14	LAMC2	protein_coding	532.557	1.5239	1.59247e-06	2.28566e-05	8.57872	laminin subunit gamma 2 [Source:HGNC Symbol;Acc:HGNC:6493]
ENSG00000058262.9	SEC61A1	protein_coding	9853.75	-0.784247	0.000262215	0.00188014	183.172	Sec61 translocon alpha 1 subunit [Source:HGNC Symbol;Acc:HGNC:18276]
ENSG00000058453.16	CROCC	protein_coding	860.569	-0.821077	0.00070463	0.00430906	8.39953	ciliary rootlet coiled-coil, rootletin [Source:HGNC Symbol;Acc:HGNC:21299]
ENSG00000058799.13	YIPF1	protein_coding	918.003	-1.15778	1.11253e-06	1.6729e-05	42.2175	Yip1 domain family member 1 [Source:HGNC Symbol;Acc:HGNC:25231]
ENSG00000059378.12	PARP12	protein_coding	162.436	-1.75989	3.80994e-07	6.46996e-06	2.91412	poly(ADP-ribose) polymerase family member 12 [Source:HGNC Symbol;Acc:HGNC:21919]
ENSG00000059588.9	TARBP1	protein_coding	1063.28	-1.00605	9.67465e-05	0.000809172	13.3182	TAR (HIV-1) RNA binding protein 1 [Source:HGNC Symbol;Acc:HGNC:11568]
ENSG00000059728.10	MXD1	protein_coding	4713.05	1.38675	1.9418e-06	2.71145e-05	76.8353	MAX dimerization protein 1 [Source:HGNC Symbol;Acc:HGNC:6761]
ENSG00000059769.19	DNAJC25	protein_coding	782.153	0.931362	0.00022577	0.00165918	23.5042	DnaJ heat shock protein family (Hsp40) member C25 [Source:HGNC Symbol;Acc:HGNC:34187]
ENSG00000060069.16	CTDP1	protein_coding	1004.21	0.631422	0.00855076	0.0333823	9.72856	CTD phosphatase subunit 1 [Source:HGNC Symbol;Acc:HGNC:2498]
ENSG00000060140.8	STYK1	protein_coding	147.999	2.18574	6.04952e-09	1.61676e-07	4.31224	serine/threonine/tyrosine kinase 1 [Source:HGNC Symbol;Acc:HGNC:18889]
ENSG00000060491.16	OGFR	protein_coding	8493.08	0.737718	0.00209842	0.0107775	145.08	opioid growth factor receptor [Source:HGNC Symbol;Acc:HGNC:15768]
ENSG00000060688.12	SNRNP40	protein_coding	2011.65	-1.2195	6.94522e-07	1.10194e-05	52.688	small nuclear ribonucleoprotein U5 subunit 40 [Source:HGNC Symbol;Acc:HGNC:30857]
ENSG00000060749.14	QSER1	protein_coding	4301	0.608502	0.00356218	0.0167001	31.3556	glutamine and serine rich 1 [Source:HGNC Symbol;Acc:HGNC:26154]
ENSG00000060762.18	MPC1	protein_coding	315.091	-1.04539	0.00108086	0.00620994	18.5859	mitochondrial pyruvate carrier 1 [Source:HGNC Symbol;Acc:HGNC:21606]
ENSG00000061656.9	SPAG4	protein_coding	1087.15	2.75841	3.52422e-23	6.62926e-21	49.9775	sperm associated antigen 4 [Source:HGNC Symbol;Acc:HGNC:11214]
ENSG00000062282.14	DGAT2	protein_coding	482.991	-2.52619	9.46931e-21	1.45865e-18	7.27546	diacylglycerol O-acyltransferase 2 [Source:HGNC Symbol;Acc:HGNC:16940]
ENSG00000062485.18	CS	protein_coding	6304.89	-0.729812	0.00252625	0.0124931	82.192	citrate synthase [Source:HGNC Symbol;Acc:HGNC:2422]
ENSG00000062822.12	POLD1	protein_coding	1796.73	-0.734392	0.00451826	0.02013	32.2115	DNA polymerase delta 1, catalytic subunit [Source:HGNC Symbol;Acc:HGNC:9175]
ENSG00000063046.17	EIF4B	protein_coding	117953	1.01366	2.54317e-05	0.000254097	1624.84	eukaryotic translation initiation factor 4B [Source:HGNC Symbol;Acc:HGNC:3285]
ENSG00000063127.15	SLC6A16	protein_coding	122.352	1.07146	0.00579477	0.0245481	3.58744	solute carrier family 6 member 16 [Source:HGNC Symbol;Acc:HGNC:13622]
ENSG00000063180.8	CA11	protein_coding	652.312	1.81858	1.75833e-09	5.42558e-08	33.8061	carbonic anhydrase 11 [Source:HGNC Symbol;Acc:HGNC:1370]
ENSG00000063438.16	AHRR	protein_coding	111.024	1.00617	0.00897238	0.034744	1.41426	aryl-hydrocarbon receptor repressor [Source:HGNC Symbol;Acc:HGNC:346]
ENSG00000063761.15	ADCK1	protein_coding	254.436	-1.75613	7.69915e-07	1.20376e-05	5.63768	aarF domain containing kinase 1 [Source:HGNC Symbol;Acc:HGNC:19038]
ENSG00000064042.17	LIMCH1	protein_coding	315.518	2.81407	1.2151e-19	1.68589e-17	3.24051	LIM and calponin homology domains 1 [Source:HGNC Symbol;Acc:HGNC:29191]
ENSG00000064115.10	TM7SF3	protein_coding	3836.5	-0.922405	3.61007e-05	0.000345011	88.2014	transmembrane 7 superfamily member 3 [Source:HGNC Symbol;Acc:HGNC:23049]
ENSG00000064199.6	SPA17	protein_coding	243.049	-1.26133	0.000143003	0.00112987	5.07053	sperm autoantigenic protein 17 [Source:HGNC Symbol;Acc:HGNC:11210]
ENSG00000064205.10	WISP2	protein_coding	6685.04	2.14821	2.97387e-12	1.65749e-10	148.64	WNT1 inducible signaling pathway protein 2 [Source:HGNC Symbol;Acc:HGNC:12770]
ENSG00000064309.14	CDON	protein_coding	1536.62	1.51326	3.39275e-08	7.50819e-07	14.4696	cell adhesion associated, oncogene regulated [Source:HGNC Symbol;Acc:HGNC:17104]
ENSG00000064547.13	LPAR2	protein_coding	1022.77	-0.66988	0.00438038	0.0196545	29.4896	lysophosphatidic acid receptor 2 [Source:HGNC Symbol;Acc:HGNC:3168]
ENSG00000064652.10	SNX24	protein_coding	1750.51	-1.368	3.49757e-08	7.70529e-07	53.5149	sorting nexin 24 [Source:HGNC Symbol;Acc:HGNC:21533]
ENSG00000064666.14	CNN2	protein_coding	784.676	0.948465	0.00450997	0.020116	20.954	calponin 2 [Source:HGNC Symbol;Acc:HGNC:2156]
ENSG00000064687.12	ABCA7	protein_coding	273.739	-1.71221	0.000161076	0.00124649	3.75934	ATP binding cassette subfamily A member 7 [Source:HGNC Symbol;Acc:HGNC:37]
ENSG00000064703.11	DDX20	protein_coding	1646.35	-0.928819	0.000219677	0.00162171	24.9197	DEAD-box helicase 20 [Source:HGNC Symbol;Acc:HGNC:2743]
ENSG00000064787.12	BCAS1	protein_coding	12162.4	2.66409	2.45514e-25	5.71784e-23	172.222	breast carcinoma amplified sequence 1 [Source:HGNC Symbol;Acc:HGNC:974]
ENSG00000065183.15	WDR3	protein_coding	2356.7	-0.741628	0.00122519	0.00687559	19.8699	WD repeat domain 3 [Source:HGNC Symbol;Acc:HGNC:12755]
ENSG00000065268.10	WDR18	protein_coding	556.432	-0.793321	0.00208788	0.0107374	20.7884	WD repeat domain 18 [Source:HGNC Symbol;Acc:HGNC:17956]
ENSG00000065328.16	MCM10	protein_coding	2077.37	-2.32823	2.57435e-11	1.15978e-09	48.0358	minichromosome maintenance 10 replication initiation factor [Source:HGNC Symbol;Acc:HGNC:18043]
ENSG00000065413.16	ANKRD44	protein_coding	269.769	-1.37905	0.000164604	0.001269	3.03927	ankyrin repeat domain 44 [Source:HGNC Symbol;Acc:HGNC:25259]
ENSG00000065457.10	ADAT1	protein_coding	2453.67	-1.72424	4.02333e-07	6.7677e-06	59.948	adenosine deaminase, tRNA specific 1 [Source:HGNC Symbol;Acc:HGNC:228]
ENSG00000065526.10	SPEN	protein_coding	6274.65	0.672397	0.00114888	0.00651279	37.633	spen family transcriptional repressor [Source:HGNC Symbol;Acc:HGNC:17575]
ENSG00000065600.12	TMEM206	protein_coding	199.228	-1.07621	0.00773025	0.0308626	7.26528	transmembrane protein 206 [Source:HGNC Symbol;Acc:HGNC:25593]
ENSG00000065665.20	SEC61A2	protein_coding	337.284	-0.730553	0.00805876	0.0318299	7.33508	Sec61 translocon alpha 2 subunit [Source:HGNC Symbol;Acc:HGNC:17702]
ENSG00000065717.14	TLE2	protein_coding	692.474	0.699621	0.0039348	0.0180273	13.0483	transducin like enhancer of split 2 [Source:HGNC Symbol;Acc:HGNC:11838]
ENSG00000065833.8	ME1	protein_coding	2603.74	1.27604	1.10224e-06	1.6587e-05	74.0286	malic enzyme 1 [Source:HGNC Symbol;Acc:HGNC:6983]
ENSG00000065882.15	TBC1D1	protein_coding	2306.65	0.718332	0.000949759	0.0055546	21.0582	TBC1 domain family member 1 [Source:HGNC Symbol;Acc:HGNC:11578]
ENSG00000065923.9	SLC9A7	protein_coding	4042.26	0.705639	0.00102903	0.00594356	78.4426	solute carrier family 9 member A7 [Source:HGNC Symbol;Acc:HGNC:17123]
ENSG00000066248.14	NGEF	protein_coding	481.628	1.47356	0.000359281	0.00244388	12.4916	neuronal guanine nucleotide exchange factor [Source:HGNC Symbol;Acc:HGNC:7807]
ENSG00000066468.20	FGFR2	protein_coding	691.221	-0.79706	0.00318187	0.0152044	8.52345	fibroblast growth factor receptor 2 [Source:HGNC Symbol;Acc:HGNC:3689]
ENSG00000066583.11	ISOC1	protein_coding	10359.7	-1.26098	6.70753e-08	1.37691e-06	517.991	isochorismatase domain containing 1 [Source:HGNC Symbol;Acc:HGNC:24254]
ENSG00000066629.16	EML1	protein_coding	3104.57	-0.927315	0.000175745	0.00134458	31.2234	echinoderm microtubule associated protein like 1 [Source:HGNC Symbol;Acc:HGNC:3330]
ENSG00000066697.14	MSANTD3	protein_coding	1953.54	1.56499	6.38326e-10	2.20629e-08	68.7917	Myb/SANT DNA binding domain containing 3 [Source:HGNC Symbol;Acc:HGNC:23370]
ENSG00000066735.14	KIF26A	protein_coding	753.625	-1.51414	3.61538e-09	1.02376e-07	12.1656	kinesin family member 26A [Source:HGNC Symbol;Acc:HGNC:20226]
ENSG00000066926.10	FECH	protein_coding	922.228	-0.624344	0.0103273	0.039014	17.6628	ferrochelatase [Source:HGNC Symbol;Acc:HGNC:3647]
ENSG00000067057.16	PFKP	protein_coding	25190	2.71515	2.55098e-24	5.25313e-22	534.777	phosphofructokinase, platelet [Source:HGNC Symbol;Acc:HGNC:8878]
ENSG00000067066.16	SP100	protein_coding	1371.14	0.647773	0.0114322	0.0423094	8.4256	SP100 nuclear antigen [Source:HGNC Symbol;Acc:HGNC:11206]
ENSG00000067082.14	KLF6	protein_coding	2216.86	1.34271	9.16811e-07	1.41003e-05	34.5672	Kruppel like factor 6 [Source:HGNC Symbol;Acc:HGNC:2235]
ENSG00000067221.13	STOML1	protein_coding	242.803	-0.860397	0.00415943	0.0188577	2.04328	stomatin like 1 [Source:HGNC Symbol;Acc:HGNC:14560]
ENSG00000067225.17	PKM	protein_coding	125259	1.95242	4.68627e-14	3.43361e-12	1685.06	pyruvate kinase M1/2 [Source:HGNC Symbol;Acc:HGNC:9021]
ENSG00000067248.9	DHX29	protein_coding	3578.65	-1.21275	6.16992e-09	1.64444e-07	69.2831	DExH-box helicase 29 [Source:HGNC Symbol;Acc:HGNC:15815]
ENSG00000067533.5	RRP15	protein_coding	1519.95	-1.3806	1.12719e-08	2.81626e-07	18.21	ribosomal RNA processing 15 homolog [Source:HGNC Symbol;Acc:HGNC:24255]
ENSG00000067596.10	DHX8	protein_coding	4576.43	-0.648087	0.00355484	0.0166731	39.9489	DEAH-box helicase 8 [Source:HGNC Symbol;Acc:HGNC:2749]
ENSG00000067606.15	PRKCZ	protein_coding	2396.3	0.78343	0.000696984	0.00427031	24.3775	protein kinase C zeta [Source:HGNC Symbol;Acc:HGNC:9412]
ENSG00000067836.12	ROGDI	protein_coding	1563.09	-1.22468	4.67706e-08	1.00768e-06	39.9377	rogdi homolog [Source:HGNC Symbol;Acc:HGNC:29478]
ENSG00000067992.12	PDK3	protein_coding	3494.49	0.941444	3.31229e-05	0.00032015	114.562	pyruvate dehydrogenase kinase 3 [Source:HGNC Symbol;Acc:HGNC:8811]
ENSG00000068028.17	RASSF1	protein_coding	1209.77	1.30973	8.59161e-06	9.88111e-05	33.1704	Ras association domain family member 1 [Source:HGNC Symbol;Acc:HGNC:9882]
ENSG00000068079.7	IFI35	protein_coding	206.482	-1.93639	1.76306e-09	5.43161e-08	11.5316	interferon induced protein 35 [Source:HGNC Symbol;Acc:HGNC:5399]
ENSG00000068305.17	MEF2A	protein_coding	6109.95	0.942718	4.1367e-06	5.26179e-05	73.3822	myocyte enhancer factor 2A [Source:HGNC Symbol;Acc:HGNC:6993]
ENSG00000068323.16	TFE3	protein_coding	2343.72	0.991423	7.08969e-06	8.33507e-05	45.4497	transcription factor binding to IGHM enhancer 3 [Source:HGNC Symbol;Acc:HGNC:11752]
ENSG00000068354.15	TBC1D25	protein_coding	756.887	0.7608	0.00156863	0.00847942	13.9227	TBC1 domain family member 25 [Source:HGNC Symbol;Acc:HGNC:8092]
ENSG00000068383.18	INPP5A	protein_coding	1988.12	0.700464	0.00110912	0.00633143	42.3424	inositol polyphosphate-5-phosphatase A [Source:HGNC Symbol;Acc:HGNC:6076]
ENSG00000068394.10	GPKOW	protein_coding	1276.08	-0.684254	0.00327503	0.0155621	63.4632	G-patch domain and KOW motifs [Source:HGNC Symbol;Acc:HGNC:30677]
ENSG00000068438.14	FTSJ1	protein_coding	1003.2	-0.920671	9.47608e-05	0.000795284	31.9499	FtsJ RNA methyltransferase homolog 1 [Source:HGNC Symbol;Acc:HGNC:13254]
ENSG00000068489.12	PRR11	protein_coding	17734.9	1.17639	5.79592e-07	9.38622e-06	378.262	proline rich 11 [Source:HGNC Symbol;Acc:HGNC:25619]
ENSG00000068654.15	POLR1A	protein_coding	3470.24	-1.15309	4.11131e-06	5.2329e-05	26.2288	RNA polymerase I subunit A [Source:HGNC Symbol;Acc:HGNC:17264]
ENSG00000068724.15	TTC7A	protein_coding	2921.78	-1.44373	4.87907e-09	1.34058e-07	46.6013	tetratricopeptide repeat domain 7A [Source:HGNC Symbol;Acc:HGNC:19750]
ENSG00000068903.19	SIRT2	protein_coding	2478.2	0.76363	0.00227842	0.0114938	32.6653	sirtuin 2 [Source:HGNC Symbol;Acc:HGNC:10886]
ENSG00000068971.13	PPP2R5B	protein_coding	858.752	1.83052	1.90543e-13	1.28096e-11	24.3213	protein phosphatase 2 regulatory subunit B'beta [Source:HGNC Symbol;Acc:HGNC:9310]
ENSG00000069011.15	PITX1	protein_coding	285.386	-0.855364	0.00617619	0.0258228	7.19298	paired like homeodomain 1 [Source:HGNC Symbol;Acc:HGNC:9004]
ENSG00000069188.16	SDK2	protein_coding	379.62	-1.00227	0.000576186	0.00364433	3.27552	sidekick cell adhesion molecule 2 [Source:HGNC Symbol;Acc:HGNC:19308]
ENSG00000069535.13	MAOB	protein_coding	518.869	-2.49994	2.15249e-10	8.28922e-09	26.4632	monoamine oxidase B [Source:HGNC Symbol;Acc:HGNC:6834]
ENSG00000069764.9	PLA2G10	protein_coding	46.2025	1.53459	0.00445411	0.0199167	5.6956	phospholipase A2 group X [Source:HGNC Symbol;Acc:HGNC:9029]
ENSG00000069869.15	NEDD4	protein_coding	2428.65	-1.16675	2.31778e-05	0.000234088	28.4782	neural precursor cell expressed, developmentally down-regulated 4, E3 ubiquitin protein ligase [Source:HGNC Symbol;Acc:HGNC:7727]
ENSG00000069956.11	MAPK6	protein_coding	15762.9	0.906887	0.000136135	0.00108349	206.126	mitogen-activated protein kinase 6 [Source:HGNC Symbol;Acc:HGNC:6879]
ENSG00000069998.12	CECR5	protein_coding	2290.63	0.651597	0.0047416	0.0209249	34.7461	haloacid dehalogenase like hydrolase domain containing 5 [Source:HGNC Symbol;Acc:HGNC:1843]
ENSG00000070087.13	PFN2	protein_coding	3195.38	0.692647	0.000938434	0.00550317	71.1002	profilin 2 [Source:HGNC Symbol;Acc:HGNC:8882]
ENSG00000070182.17	SPTB	protein_coding	224.531	2.54743	3.49668e-08	7.70529e-07	2.67194	spectrin beta, erythrocytic [Source:HGNC Symbol;Acc:HGNC:11274]
ENSG00000070404.9	FSTL3	protein_coding	1390.8	1.48106	3.54676e-05	0.000339625	54.1325	follistatin like 3 [Source:HGNC Symbol;Acc:HGNC:3973]
ENSG00000070413.18	DGCR2	protein_coding	2923.2	-0.658239	0.00305114	0.0146665	43.626	DiGeorge syndrome critical region gene 2 [Source:HGNC Symbol;Acc:HGNC:2845]
ENSG00000070423.17	RNF126	protein_coding	1295.19	0.795159	0.000368853	0.0025003	29.7155	ring finger protein 126 [Source:HGNC Symbol;Acc:HGNC:21151]
ENSG00000070495.14	JMJD6	protein_coding	2549.33	1.65147	5.22291e-12	2.74666e-10	38.693	arginine demethylase and lysine hydroxylase [Source:HGNC Symbol;Acc:HGNC:19355]
ENSG00000070501.11	POLB	protein_coding	503.788	-0.851442	0.00157647	0.00851582	11.5117	DNA polymerase beta [Source:HGNC Symbol;Acc:HGNC:9174]
ENSG00000070610.14	GBA2	protein_coding	1677.81	-0.891576	0.000404411	0.00270279	29.9734	glucosylceramidase beta 2 [Source:HGNC Symbol;Acc:HGNC:18986]
ENSG00000070756.13	PABPC1	protein_coding	47610.2	0.743862	0.000283206	0.00200325	778.917	poly(A) binding protein cytoplasmic 1 [Source:HGNC Symbol;Acc:HGNC:8554]
ENSG00000070759.16	TESK2	protein_coding	1227.64	0.917732	0.000203196	0.00151375	34.7998	testis-specific kinase 2 [Source:HGNC Symbol;Acc:HGNC:11732]
ENSG00000070770.8	CSNK2A2	protein_coding	2335.14	0.628584	0.00365429	0.0170212	25.8421	casein kinase 2 alpha 2 [Source:HGNC Symbol;Acc:HGNC:2459]
ENSG00000070785.16	EIF2B3	protein_coding	591.591	-1.60015	2.35148e-09	7.03395e-08	21.7431	eukaryotic translation initiation factor 2B subunit gamma [Source:HGNC Symbol;Acc:HGNC:3259]
ENSG00000070814.17	TCOF1	protein_coding	2672.96	-0.696525	0.0061002	0.025609	22.3858	treacle ribosome biogenesis factor 1 [Source:HGNC Symbol;Acc:HGNC:11654]
ENSG00000070882.12	OSBPL3	protein_coding	95.9748	-2.07783	4.97172e-05	0.000456842	1.92507	oxysterol binding protein like 3 [Source:HGNC Symbol;Acc:HGNC:16370]
ENSG00000071051.13	NCK2	protein_coding	2295.6	1.58744	7.14217e-09	1.86794e-07	90.3486	NCK adaptor protein 2 [Source:HGNC Symbol;Acc:HGNC:7665]
ENSG00000071246.10	VASH1	protein_coding	333.609	-1.67935	7.05772e-06	8.30248e-05	5.30835	vasohibin 1 [Source:HGNC Symbol;Acc:HGNC:19964]
ENSG00000071462.11	WBSCR22	protein_coding	2321.24	-0.601879	0.00554189	0.023713	23.106	BUD23, rRNA methyltransferase and ribosome maturation factor [Source:HGNC Symbol;Acc:HGNC:16405]
ENSG00000071539.13	TRIP13	protein_coding	1354.9	-1.68173	2.17621e-08	5.0562e-07	43.7941	thyroid hormone receptor interactor 13 [Source:HGNC Symbol;Acc:HGNC:12307]
ENSG00000071564.14	TCF3	protein_coding	3786.84	0.735528	0.000796748	0.00479741	50.6578	transcription factor 3 [Source:HGNC Symbol;Acc:HGNC:11633]
ENSG00000071794.15	HLTF	protein_coding	7257.67	-0.773814	0.00380184	0.0175455	98.9444	helicase like transcription factor [Source:HGNC Symbol;Acc:HGNC:11099]
ENSG00000071889.16	FAM3A	protein_coding	3065.17	0.70311	0.0013834	0.00763428	44.1879	family with sequence similarity 3 member A [Source:HGNC Symbol;Acc:HGNC:13749]
ENSG00000072042.12	RDH11	protein_coding	4975.49	0.782321	0.00121978	0.00684918	78.5944	retinol dehydrogenase 11 (all-trans/9-cis/11-cis) [Source:HGNC Symbol;Acc:HGNC:17964]
ENSG00000072071.16	ADGRL1	protein_coding	2167.54	0.750217	0.00180362	0.00952876	23.1314	adhesion G protein-coupled receptor L1 [Source:HGNC Symbol;Acc:HGNC:20973]
ENSG00000072210.18	ALDH3A2	protein_coding	2943.26	-0.860009	0.000368089	0.00249686	40.1161	aldehyde dehydrogenase 3 family member A2 [Source:HGNC Symbol;Acc:HGNC:403]
ENSG00000072364.12	AFF4	protein_coding	16154.4	0.725963	0.000420916	0.00279917	107.654	AF4/FMR2 family member 4 [Source:HGNC Symbol;Acc:HGNC:17869]
ENSG00000072501.17	SMC1A	protein_coding	8680.31	-1.1573	1.18973e-07	2.28182e-06	78.9899	structural maintenance of chromosomes 1A [Source:HGNC Symbol;Acc:HGNC:11111]
ENSG00000072506.12	HSD17B10	protein_coding	2220.93	-1.44555	2.23089e-09	6.71222e-08	199.767	hydroxysteroid 17-beta dehydrogenase 10 [Source:HGNC Symbol;Acc:HGNC:4800]
ENSG00000072682.18	P4HA2	protein_coding	4927.38	2.84891	1.72779e-27	5.12133e-25	64.0775	prolyl 4-hydroxylase subunit alpha 2 [Source:HGNC Symbol;Acc:HGNC:8547]
ENSG00000072756.16	TRNT1	protein_coding	1848.97	-0.796893	0.000388064	0.00261152	29.2004	tRNA nucleotidyl transferase 1 [Source:HGNC Symbol;Acc:HGNC:17341]
ENSG00000072858.10	SIDT1	protein_coding	1969.19	-1.67698	3.12438e-13	2.04422e-11	26.5062	SID1 transmembrane family member 1 [Source:HGNC Symbol;Acc:HGNC:25967]
ENSG00000072954.6	TMEM38A	protein_coding	403.328	0.979634	0.000874179	0.00519016	12.3829	transmembrane protein 38A [Source:HGNC Symbol;Acc:HGNC:28462]
ENSG00000072958.8	AP1M1	protein_coding	1485.64	-0.74786	0.00367018	0.017083	9.67321	adaptor related protein complex 1 mu 1 subunit [Source:HGNC Symbol;Acc:HGNC:13667]
ENSG00000073060.15	SCARB1	protein_coding	4900.62	2.1248	5.9044e-20	8.43123e-18	71.3177	scavenger receptor class B member 1 [Source:HGNC Symbol;Acc:HGNC:1664]
ENSG00000073111.13	MCM2	protein_coding	6624.23	-2.06267	1.34208e-17	1.49177e-15	145.332	minichromosome maintenance complex component 2 [Source:HGNC Symbol;Acc:HGNC:6944]
ENSG00000073150.13	PANX2	protein_coding	119.25	2.06869	1.29058e-05	0.00014216	3.88474	pannexin 2 [Source:HGNC Symbol;Acc:HGNC:8600]
ENSG00000073605.18	GSDMB	protein_coding	827.717	1.41396	1.46334e-07	2.73683e-06	13.4217	gasdermin B [Source:HGNC Symbol;Acc:HGNC:23690]
ENSG00000073792.15	IGF2BP2	protein_coding	76.2576	1.57897	0.000685758	0.00421209	1.63146	insulin like growth factor 2 mRNA binding protein 2 [Source:HGNC Symbol;Acc:HGNC:28867]
ENSG00000074181.8	NOTCH3	protein_coding	11849.9	1.38061	6.61818e-09	1.74725e-07	125.445	notch 3 [Source:HGNC Symbol;Acc:HGNC:7883]
ENSG00000074370.17	ATP2A3	protein_coding	4287.2	-0.983315	0.00113582	0.00645056	59.6974	ATPase sarcoplasmic/endoplasmic reticulum Ca2+ transporting 3 [Source:HGNC Symbol;Acc:HGNC:813]
ENSG00000074410.13	CA12	protein_coding	8308.55	-0.741095	0.000624098	0.00389491	100.793	carbonic anhydrase 12 [Source:HGNC Symbol;Acc:HGNC:1371]
ENSG00000074416.13	MGLL	protein_coding	2087.98	1.16264	0.000161878	0.00125103	20.8571	monoglyceride lipase [Source:HGNC Symbol;Acc:HGNC:17038]
ENSG00000074527.11	NTN4	protein_coding	604.843	1.75328	4.29428e-10	1.55285e-08	14.1614	netrin 4 [Source:HGNC Symbol;Acc:HGNC:13658]
ENSG00000074582.12	BCS1L	protein_coding	636.796	-1.32224	6.39505e-07	1.02462e-05	20.0821	BCS1 homolog, ubiquinol-cytochrome c reductase complex chaperone [Source:HGNC Symbol;Acc:HGNC:1020]
ENSG00000074590.13	NUAK1	protein_coding	1273.05	1.19636	2.2259e-07	4.02452e-06	16.9685	NUAK family kinase 1 [Source:HGNC Symbol;Acc:HGNC:14311]
ENSG00000074621.13	SLC24A1	protein_coding	1212.15	-0.59074	0.00892654	0.0345939	10.6821	solute carrier family 24 member 1 [Source:HGNC Symbol;Acc:HGNC:10975]
ENSG00000074695.5	LMAN1	protein_coding	10532.3	1.17684	5.59998e-07	9.11417e-06	135.515	lectin, mannose binding 1 [Source:HGNC Symbol;Acc:HGNC:6631]
ENSG00000074696.12	HACD3	protein_coding	13095.4	-0.658845	0.00187761	0.00984829	149.857	3-hydroxyacyl-CoA dehydratase 3 [Source:HGNC Symbol;Acc:HGNC:24175]
ENSG00000074800.13	ENO1	protein_coding	176357	1.91781	2.27616e-15	1.96161e-13	4344.89	enolase 1 [Source:HGNC Symbol;Acc:HGNC:3350]
ENSG00000074935.13	TUBE1	protein_coding	587.786	-2.3785	2.44879e-10	9.28405e-09	13.4675	tubulin epsilon 1 [Source:HGNC Symbol;Acc:HGNC:20775]
ENSG00000075131.9	TIPIN	protein_coding	673.758	-1.43001	7.46005e-08	1.49991e-06	26.1584	TIMELESS interacting protein [Source:HGNC Symbol;Acc:HGNC:30750]
ENSG00000075223.13	SEMA3C	protein_coding	58830.5	-0.663888	0.00604859	0.0254415	841.287	semaphorin 3C [Source:HGNC Symbol;Acc:HGNC:10725]
ENSG00000075234.16	TTC38	protein_coding	519.723	-1.1779	1.06592e-05	0.000120119	14.4981	tetratricopeptide repeat domain 38 [Source:HGNC Symbol;Acc:HGNC:26082]
ENSG00000075239.13	ACAT1	protein_coding	764.645	-0.842646	0.00090515	0.00534484	12.1215	acetyl-CoA acetyltransferase 1 [Source:HGNC Symbol;Acc:HGNC:93]
ENSG00000075407.17	ZNF37A	protein_coding	3232.24	0.769756	0.00112801	0.00641489	30.4919	zinc finger protein 37A [Source:HGNC Symbol;Acc:HGNC:13102]
ENSG00000075420.12	FNDC3B	protein_coding	3192.49	1.17852	8.58498e-08	1.7016e-06	19.91	fibronectin type III domain containing 3B [Source:HGNC Symbol;Acc:HGNC:24670]
ENSG00000075426.11	FOSL2	protein_coding	16794.1	1.08214	2.39426e-06	3.24145e-05	198.532	FOS like 2, AP-1 transcription factor subunit [Source:HGNC Symbol;Acc:HGNC:3798]
ENSG00000075618.17	FSCN1	protein_coding	811.138	1.97052	5.3295e-11	2.247e-09	20.6873	fascin actin-bundling protein 1 [Source:HGNC Symbol;Acc:HGNC:11148]
ENSG00000075643.5	MOCOS	protein_coding	970.428	-1.74868	8.39719e-09	2.15019e-07	16.3458	molybdenum cofactor sulfurase [Source:HGNC Symbol;Acc:HGNC:18234]
ENSG00000075651.15	PLD1	protein_coding	3095.21	0.911564	0.00210532	0.0108101	29.2306	phospholipase D1 [Source:HGNC Symbol;Acc:HGNC:9067]
ENSG00000075702.16	WDR62	protein_coding	1520.96	-1.15819	1.4017e-05	0.000152552	15.7634	WD repeat domain 62 [Source:HGNC Symbol;Acc:HGNC:24502]
ENSG00000075790.10	BCAP29	protein_coding	2521.19	-1.09769	4.66148e-06	5.827e-05	35.9192	B-cell receptor associated protein 29 [Source:HGNC Symbol;Acc:HGNC:24131]
ENSG00000076003.4	MCM6	protein_coding	3546.1	-1.87528	4.82658e-10	1.7199e-08	104.229	minichromosome maintenance complex component 6 [Source:HGNC Symbol;Acc:HGNC:6949]
ENSG00000076067.11	RBMS2	protein_coding	559.256	1.0842	0.000339301	0.00232739	5.92203	RNA binding motif single stranded interacting protein 2 [Source:HGNC Symbol;Acc:HGNC:9909]
ENSG00000076242.14	MLH1	protein_coding	2881.14	-1.3754	1.77792e-08	4.22106e-07	88.2627	mutL homolog 1 [Source:HGNC Symbol;Acc:HGNC:7127]
ENSG00000076248.10	UNG	protein_coding	3163.33	-1.5783	3.67308e-12	2.00157e-10	129.447	uracil DNA glycosylase [Source:HGNC Symbol;Acc:HGNC:12572]
ENSG00000076351.12	SLC46A1	protein_coding	934.038	-1.03036	1.24631e-05	0.000137826	10.9942	solute carrier family 46 member 1 [Source:HGNC Symbol;Acc:HGNC:30521]
ENSG00000076554.15	TPD52	protein_coding	6424.93	1.19416	6.41041e-07	1.02624e-05	66.2498	tumor protein D52 [Source:HGNC Symbol;Acc:HGNC:12005]
ENSG00000076641.4	PAG1	protein_coding	699.304	1.14086	3.17272e-06	4.17404e-05	5.19575	phosphoprotein membrane anchor with glycosphingolipid microdomains 1 [Source:HGNC Symbol;Acc:HGNC:30043]
ENSG00000076826.9	CAMSAP3	protein_coding	1565.13	0.831848	0.000304408	0.00212683	28.4661	calmodulin regulated spectrin associated protein family member 3 [Source:HGNC Symbol;Acc:HGNC:29307]
ENSG00000076864.19	RAP1GAP	protein_coding	1396.95	1.89986	2.40561e-09	7.17392e-08	28.742	RAP1 GTPase activating protein [Source:HGNC Symbol;Acc:HGNC:9858]
ENSG00000077044.9	DGKD	protein_coding	3834.73	1.07269	1.50477e-06	2.18058e-05	32.8922	diacylglycerol kinase delta [Source:HGNC Symbol;Acc:HGNC:2851]
ENSG00000077150.17	NFKB2	protein_coding	1640.39	1.10067	3.15513e-05	0.000306626	32.5886	nuclear factor kappa B subunit 2 [Source:HGNC Symbol;Acc:HGNC:7795]
ENSG00000077152.9	UBE2T	protein_coding	2840.01	-1.11845	1.27303e-06	1.8725e-05	238.977	ubiquitin conjugating enzyme E2 T [Source:HGNC Symbol;Acc:HGNC:25009]
ENSG00000077232.16	DNAJC10	protein_coding	4407.99	-1.18575	2.99539e-06	3.96742e-05	18.5216	DnaJ heat shock protein family (Hsp40) member C10 [Source:HGNC Symbol;Acc:HGNC:24637]
ENSG00000077235.17	GTF3C1	protein_coding	11078.7	-0.651426	0.00167062	0.0089418	77.6498	general transcription factor IIIC subunit 1 [Source:HGNC Symbol;Acc:HGNC:4664]
ENSG00000077348.8	EXOSC5	protein_coding	673.642	-1.25136	1.07775e-05	0.000121243	45.7238	exosome component 5 [Source:HGNC Symbol;Acc:HGNC:24662]
ENSG00000077514.8	POLD3	protein_coding	2321.23	-1.38731	1.84328e-09	5.65206e-08	40.026	DNA polymerase delta 3, accessory subunit [Source:HGNC Symbol;Acc:HGNC:20932]
ENSG00000077585.13	GPR137B	protein_coding	1635.18	0.914924	2.71857e-05	0.000269692	57.2646	G protein-coupled receptor 137B [Source:HGNC Symbol;Acc:HGNC:11862]
ENSG00000077721.15	UBE2A	protein_coding	3182.12	-0.685137	0.0010519	0.00605778	48.2765	ubiquitin conjugating enzyme E2 A [Source:HGNC Symbol;Acc:HGNC:12472]
ENSG00000078043.15	PIAS2	protein_coding	2935.7	1.85814	8.08715e-16	7.25729e-14	16.2223	protein inhibitor of activated STAT 2 [Source:HGNC Symbol;Acc:HGNC:17311]
ENSG00000078114.18	NEBL	protein_coding	13427.8	1.10758	2.97076e-07	5.1983e-06	83.5521	nebulette [Source:HGNC Symbol;Acc:HGNC:16932]
ENSG00000078124.11	ACER3	protein_coding	1399.91	-0.872958	0.00262074	0.0129045	14.2854	alkaline ceramidase 3 [Source:HGNC Symbol;Acc:HGNC:16066]
ENSG00000078237.6	TIGAR	protein_coding	375.866	-1.10482	0.000175878	0.00134481	8.37413	TP53 induced glycolysis regulatory phosphatase [Source:HGNC Symbol;Acc:HGNC:1185]
ENSG00000078403.16	MLLT10	protein_coding	4780.99	0.637574	0.00700936	0.0286391	52.7	MLLT10, histone lysine methyltransferase DOT1L cofactor [Source:HGNC Symbol;Acc:HGNC:16063]
ENSG00000078967.12	UBE2D4	protein_coding	515.034	-1.89271	7.9503e-13	4.89094e-11	12.2376	ubiquitin conjugating enzyme E2 D4 (putative) [Source:HGNC Symbol;Acc:HGNC:21647]
ENSG00000079246.15	XRCC5	protein_coding	26487.3	-0.890569	1.09671e-05	0.000122951	421.427	X-ray repair cross complementing 5 [Source:HGNC Symbol;Acc:HGNC:12833]
ENSG00000079387.13	SENP1	protein_coding	2769.48	-0.782982	0.00131371	0.00730949	36.4578	SUMO1/sentrin specific peptidase 1 [Source:HGNC Symbol;Acc:HGNC:17927]
ENSG00000079432.7	CIC	protein_coding	2579.79	0.666328	0.00382399	0.0176145	23.4815	capicua transcriptional repressor [Source:HGNC Symbol;Acc:HGNC:14214]
ENSG00000079462.7	PAFAH1B3	protein_coding	2313.74	-0.758884	0.000918707	0.00540694	145.827	platelet activating factor acetylhydrolase 1b catalytic subunit 3 [Source:HGNC Symbol;Acc:HGNC:8576]
ENSG00000079482.12	OPHN1	protein_coding	740.261	-0.63982	0.011262	0.0417903	7.19359	oligophrenin 1 [Source:HGNC Symbol;Acc:HGNC:8148]
ENSG00000079616.12	KIF22	protein_coding	10896.3	-0.815193	8.35379e-05	0.000710236	211.067	kinesin family member 22 [Source:HGNC Symbol;Acc:HGNC:6391]
ENSG00000079739.15	PGM1	protein_coding	2030.16	4.14196	4.25445e-70	1.38716e-66	59.9483	phosphoglucomutase 1 [Source:HGNC Symbol;Acc:HGNC:8905]
ENSG00000079785.14	DDX1	protein_coding	3852.71	-0.72563	0.000526356	0.00337878	81.7206	DEAD-box helicase 1 [Source:HGNC Symbol;Acc:HGNC:2734]
ENSG00000079805.16	DNM2	protein_coding	15336.3	1.291	3.61772e-10	1.33033e-08	106.776	dynamin 2 [Source:HGNC Symbol;Acc:HGNC:2974]
ENSG00000079974.17	RABL2B	protein_coding	258.976	-0.973776	0.00376189	0.0174027	4.05244	RAB, member of RAS oncogene family like 2B [Source:HGNC Symbol;Acc:HGNC:9800]
ENSG00000080031.9	PTPRH	protein_coding	105.749	2.45289	1.38703e-08	3.37915e-07	3.38373	protein tyrosine phosphatase, receptor type H [Source:HGNC Symbol;Acc:HGNC:9672]
ENSG00000080200.9	CRYBG3	protein_coding	1626.86	0.958659	0.000312543	0.0021759	12.6204	crystallin beta-gamma domain containing 3 [Source:HGNC Symbol;Acc:HGNC:34427]
ENSG00000080298.15	RFX3	protein_coding	1497.49	1.50567	6.30445e-10	2.1829e-08	12.5194	regulatory factor X3 [Source:HGNC Symbol;Acc:HGNC:9984]
ENSG00000080561.13	MID2	protein_coding	4154.05	0.708259	0.0071137	0.0289445	126.522	midline 2 [Source:HGNC Symbol;Acc:HGNC:7096]
ENSG00000080608.9	PUM3	protein_coding	1723.1	-0.945897	2.03493e-05	0.00021052	55.6178	pumilio RNA binding family member 3 [Source:HGNC Symbol;Acc:HGNC:29676]
ENSG00000080822.16	CLDND1	protein_coding	3392.17	0.914587	0.00027689	0.00196845	55.2766	claudin domain containing 1 [Source:HGNC Symbol;Acc:HGNC:1322]
ENSG00000080823.21	MOK	protein_coding	481.547	-1.15863	0.000222443	0.00163719	4.03644	MOK protein kinase [Source:HGNC Symbol;Acc:HGNC:9833]
ENSG00000080839.11	RBL1	protein_coding	1708.69	-0.838722	0.000129886	0.00104377	23.9116	RB transcriptional corepressor like 1 [Source:HGNC Symbol;Acc:HGNC:9893]
ENSG00000080845.17	DLGAP4	protein_coding	1454.47	0.747777	0.00230275	0.0115955	12.9631	DLG associated protein 4 [Source:HGNC Symbol;Acc:HGNC:24476]
ENSG00000081019.13	RSBN1	protein_coding	9465.93	1.41736	2.89656e-11	1.28703e-09	118.585	round spermatid basic protein 1 [Source:HGNC Symbol;Acc:HGNC:25642]
ENSG00000081154.11	PCNP	protein_coding	4714.92	0.605713	0.0138408	0.049374	116.001	PEST proteolytic signal containing nuclear protein [Source:HGNC Symbol;Acc:HGNC:30023]
ENSG00000081320.10	STK17B	protein_coding	3244.4	1.19896	2.22465e-08	5.16261e-07	45.7643	serine/threonine kinase 17b [Source:HGNC Symbol;Acc:HGNC:11396]
ENSG00000081692.12	JMJD4	protein_coding	967.053	-0.613815	0.0103931	0.0391981	18.7973	jumonji domain containing 4 [Source:HGNC Symbol;Acc:HGNC:25724]
ENSG00000081853.14	PCDHGA2	protein_coding	531.603	-0.859979	0.000915453	0.00539103	6.64892	protocadherin gamma subfamily A, 2 [Source:HGNC Symbol;Acc:HGNC:8700]
ENSG00000081913.13	PHLPP1	protein_coding	1526.58	0.72756	0.00117835	0.0066567	12.2906	PH domain and leucine rich repeat protein phosphatase 1 [Source:HGNC Symbol;Acc:HGNC:20610]
ENSG00000082014.16	SMARCD3	protein_coding	225.872	-0.98123	0.00362456	0.0169222	4.30339	SWI/SNF related, matrix associated, actin dependent regulator of chromatin, subfamily d, member 3 [Source:HGNC Symbol;Acc:HGNC:11108]
ENSG00000082641.15	NFE2L1	protein_coding	21623.6	0.78834	0.000232067	0.00169907	278.807	nuclear factor, erythroid 2 like 1 [Source:HGNC Symbol;Acc:HGNC:7781]
ENSG00000082684.14	SEMA5B	protein_coding	105.924	5.43127	6.62404e-15	5.42201e-13	2.2404	semaphorin 5B [Source:HGNC Symbol;Acc:HGNC:10737]
ENSG00000082781.11	ITGB5	protein_coding	2060.53	-0.995574	0.00372051	0.0172515	28.8324	integrin subunit beta 5 [Source:HGNC Symbol;Acc:HGNC:6160]
ENSG00000083099.10	LYRM2	protein_coding	3130	-0.847365	7.6855e-05	0.000662341	30.6909	LYR motif containing 2 [Source:HGNC Symbol;Acc:HGNC:25229]
ENSG00000083290.19	ULK2	protein_coding	2000.51	-0.62666	0.00704711	0.0287533	17.2263	unc-51 like autophagy activating kinase 2 [Source:HGNC Symbol;Acc:HGNC:13480]
ENSG00000083444.16	PLOD1	protein_coding	2543.54	0.713586	0.00453258	0.0201754	39.0796	procollagen-lysine,2-oxoglutarate 5-dioxygenase 1 [Source:HGNC Symbol;Acc:HGNC:9081]
ENSG00000083457.11	ITGAE	protein_coding	527.64	-0.67924	0.0101876	0.0385867	6.91236	integrin subunit alpha E [Source:HGNC Symbol;Acc:HGNC:6147]
ENSG00000083720.12	OXCT1	protein_coding	927.387	-2.64783	2.0345e-25	4.7953e-23	26.5965	3-oxoacid CoA-transferase 1 [Source:HGNC Symbol;Acc:HGNC:8527]
ENSG00000083799.17	CYLD	protein_coding	858.712	-1.09795	0.000134144	0.00107026	6.73995	CYLD lysine 63 deubiquitinase [Source:HGNC Symbol;Acc:HGNC:2584]
ENSG00000083844.10	ZNF264	protein_coding	216.675	0.989118	0.00994103	0.0377918	1.56093	zinc finger protein 264 [Source:HGNC Symbol;Acc:HGNC:13057]
ENSG00000084073.8	ZMPSTE24	protein_coding	2484.98	-1.41247	5.70029e-06	6.93931e-05	70.0007	zinc metallopeptidase STE24 [Source:HGNC Symbol;Acc:HGNC:12877]
ENSG00000084090.13	STARD7	protein_coding	11039.2	-0.762698	0.00147049	0.00803208	215.199	StAR related lipid transfer domain containing 7 [Source:HGNC Symbol;Acc:HGNC:18063]
ENSG00000084092.6	NOA1	protein_coding	4162.87	0.886465	0.000124594	0.00100762	95.8095	nitric oxide associated 1 [Source:HGNC Symbol;Acc:HGNC:28473]
ENSG00000084628.9	NKAIN1	protein_coding	185.9	-2.43849	8.95119e-13	5.40469e-11	6.9995	sodium/potassium transporting ATPase interacting 1 [Source:HGNC Symbol;Acc:HGNC:25743]
ENSG00000084652.15	TXLNA	protein_coding	3859.67	-0.962225	2.06069e-05	0.000212399	68.5052	taxilin alpha [Source:HGNC Symbol;Acc:HGNC:30685]
ENSG00000084693.15	AGBL5	protein_coding	2834.68	0.780122	0.000837491	0.00500423	39.9549	ATP/GTP binding protein like 5 [Source:HGNC Symbol;Acc:HGNC:26147]
ENSG00000084731.13	KIF3C	protein_coding	1102.87	1.29279	0.000131204	0.00104979	20.8985	kinesin family member 3C [Source:HGNC Symbol;Acc:HGNC:6321]
ENSG00000084733.10	RAB10	protein_coding	9855.73	-0.684085	0.00355136	0.0166607	249.929	RAB10, member RAS oncogene family [Source:HGNC Symbol;Acc:HGNC:9759]
ENSG00000084774.13	CAD	protein_coding	2332.12	-2.18313	9.43273e-13	5.66051e-11	31.1885	carbamoyl-phosphate synthetase 2, aspartate transcarbamylase, and dihydroorotase [Source:HGNC Symbol;Acc:HGNC:1424]
ENSG00000085185.15	BCORL1	protein_coding	487.837	1.47466	3.61243e-06	4.66161e-05	7.11405	BCL6 corepressor like 1 [Source:HGNC Symbol;Acc:HGNC:25657]
ENSG00000085224.20	ATRX	protein_coding	16415	0.828784	0.000120144	0.000976478	72.8324	ATRX, chromatin remodeler [Source:HGNC Symbol;Acc:HGNC:886]
ENSG00000085831.15	TTC39A	protein_coding	5785.41	-1.11274	3.79977e-07	6.4583e-06	59.4988	tetratricopeptide repeat domain 39A [Source:HGNC Symbol;Acc:HGNC:18657]
ENSG00000085982.13	USP40	protein_coding	2542.53	-0.80742	0.000185143	0.00140168	22.5973	ubiquitin specific peptidase 40 [Source:HGNC Symbol;Acc:HGNC:20069]
ENSG00000085998.13	POMGNT1	protein_coding	1767.8	-0.928621	8.1989e-05	0.000698775	26.2415	protein O-linked mannose N-acetylglucosaminyltransferase 1 (beta 1,2-) [Source:HGNC Symbol;Acc:HGNC:19139]
ENSG00000085999.11	RAD54L	protein_coding	726.316	-1.02453	9.06397e-05	0.000763646	20.7608	RAD54 like [Source:HGNC Symbol;Acc:HGNC:9826]
ENSG00000086619.13	ERO1B	protein_coding	253.88	1.88733	4.9118e-09	1.34768e-07	5.55775	endoplasmic reticulum oxidoreductase 1 beta [Source:HGNC Symbol;Acc:HGNC:14355]
ENSG00000087074.7	PPP1R15A	protein_coding	3494.6	1.40985	9.23758e-06	0.000105435	124.274	protein phosphatase 1 regulatory subunit 15A [Source:HGNC Symbol;Acc:HGNC:14375]
ENSG00000087076.8	HSD17B14	protein_coding	56.6697	1.787	0.00028295	0.00200266	5.00913	hydroxysteroid 17-beta dehydrogenase 14 [Source:HGNC Symbol;Acc:HGNC:23238]
ENSG00000087086.13	FTL	protein_coding	42569	1.79281	5.35512e-10	1.89787e-08	5385.59	ferritin light chain [Source:HGNC Symbol;Acc:HGNC:3999]
ENSG00000087088.19	BAX	protein_coding	1833.45	0.71031	0.00276883	0.0135349	52.1859	BCL2 associated X, apoptosis regulator [Source:HGNC Symbol;Acc:HGNC:959]
ENSG00000087206.16	UIMC1	protein_coding	4108.9	0.684692	0.00278698	0.0136032	67.5805	ubiquitin interaction motif containing 1 [Source:HGNC Symbol;Acc:HGNC:30298]
ENSG00000087263.16	OGFOD1	protein_coding	1747.36	-1.58239	7.34418e-13	4.56391e-11	30.4075	2-oxoglutarate and iron dependent oxygenase domain containing 1 [Source:HGNC Symbol;Acc:HGNC:25585]
ENSG00000087266.15	SH3BP2	protein_coding	4708.29	1.21953	6.85555e-08	1.40141e-06	28.5736	SH3 domain binding protein 2 [Source:HGNC Symbol;Acc:HGNC:10825]
ENSG00000087301.8	TXNDC16	protein_coding	2197.8	0.659725	0.00270422	0.0132688	33.2589	thioredoxin domain containing 16 [Source:HGNC Symbol;Acc:HGNC:19965]
ENSG00000087448.9	KLHL42	protein_coding	2450.87	-1.15398	1.90226e-06	2.66384e-05	29.8517	kelch like family member 42 [Source:HGNC Symbol;Acc:HGNC:29252]
ENSG00000087470.17	DNM1L	protein_coding	3844.1	-0.694235	0.0024192	0.0120639	45.8411	dynamin 1 like [Source:HGNC Symbol;Acc:HGNC:2973]
ENSG00000087494.15	PTHLH	protein_coding	38.3971	-1.47588	0.00662231	0.027349	1.50992	parathyroid hormone like hormone [Source:HGNC Symbol;Acc:HGNC:9607]
ENSG00000088035.15	ALG6	protein_coding	858.86	-1.16716	7.54544e-07	1.18621e-05	16.3285	ALG6, alpha-1,3-glucosyltransferase [Source:HGNC Symbol;Acc:HGNC:23157]
ENSG00000088280.18	ASAP3	protein_coding	976.626	-0.693233	0.00359715	0.0168231	16.8883	ArfGAP with SH3 domain, ankyrin repeat and PH domain 3 [Source:HGNC Symbol;Acc:HGNC:14987]
ENSG00000088305.18	DNMT3B	protein_coding	616.931	-1.17508	0.000161918	0.00125103	15.3685	DNA methyltransferase 3 beta [Source:HGNC Symbol;Acc:HGNC:2979]
ENSG00000088340.15	FER1L4	unitary_pseudogene	3717.16	2.22966	8.03913e-16	7.24744e-14	48.5832	fer-1 like family member 4, pseudogene [Source:HGNC Symbol;Acc:HGNC:15801]
ENSG00000088356.5	PDRG1	protein_coding	933.981	-0.670978	0.00379954	0.017539	37.208	p53 and DNA damage regulated 1 [Source:HGNC Symbol;Acc:HGNC:16119]
ENSG00000088448.14	ANKRD10	protein_coding	3070.11	0.892632	0.000184149	0.0013947	54.3417	ankyrin repeat domain 10 [Source:HGNC Symbol;Acc:HGNC:20265]
ENSG00000088682.13	COQ9	protein_coding	952.25	-0.59865	0.0135209	0.0484894	17.9557	coenzyme Q9 [Source:HGNC Symbol;Acc:HGNC:25302]
ENSG00000088727.12	KIF9	protein_coding	127.835	-1.23362	0.000685699	0.00421209	2.26955	kinesin family member 9 [Source:HGNC Symbol;Acc:HGNC:16666]
ENSG00000088826.17	SMOX	protein_coding	169.626	1.25298	0.000275226	0.00195862	4.94832	spermine oxidase [Source:HGNC Symbol;Acc:HGNC:15862]
ENSG00000088899.14	RP5-1187M17.10	protein_coding	278.504	1.99247	3.38156e-08	7.49889e-07	5.236	leucine zipper tumor suppressor family member 3 [Source:HGNC Symbol;Acc:HGNC:30139]
ENSG00000089053.12	ANAPC5	protein_coding	9231	-0.623263	0.00431889	0.019441	60.6611	anaphase promoting complex subunit 5 [Source:HGNC Symbol;Acc:HGNC:15713]
ENSG00000089154.10	GCN1	protein_coding	10578.2	-0.618798	0.00434079	0.0195216	91.9536	GCN1, eIF2 alpha kinase activator homolog [Source:HGNC Symbol;Acc:HGNC:4199]
ENSG00000089177.17	KIF16B	protein_coding	3141.41	1.00555	0.000114641	0.000935638	42.1539	kinesin family member 16B [Source:HGNC Symbol;Acc:HGNC:15869]
ENSG00000089195.14	TRMT6	protein_coding	651.081	-1.10738	0.000198281	0.00148229	16.4699	tRNA methyltransferase 6 [Source:HGNC Symbol;Acc:HGNC:20900]
ENSG00000089289.15	IGBP1	protein_coding	5379.67	0.76482	0.00023529	0.00171881	221.25	immunoglobulin binding protein 1 [Source:HGNC Symbol;Acc:HGNC:5461]
ENSG00000089351.14	GRAMD1A	protein_coding	1819.31	1.18172	7.02934e-08	1.42947e-06	25.573	GRAM domain containing 1A [Source:HGNC Symbol;Acc:HGNC:29305]
ENSG00000089682.16	RBM41	protein_coding	1722.97	0.840557	0.000261846	0.00187843	25.1128	RNA binding motif protein 41 [Source:HGNC Symbol;Acc:HGNC:25617]
ENSG00000089723.9	OTUB2	protein_coding	516.544	0.727323	0.013526	0.0484965	9.74795	OTU deubiquitinase, ubiquitin aldehyde binding 2 [Source:HGNC Symbol;Acc:HGNC:20351]
ENSG00000089775.11	ZBTB25	protein_coding	4706.14	1.47416	4.31687e-09	1.19619e-07	37.3157	zinc finger and BTB domain containing 25 [Source:HGNC Symbol;Acc:HGNC:13112]
ENSG00000089818.16	NECAP1	protein_coding	2376.64	-0.876989	4.86609e-05	0.0004484	48.815	NECAP endocytosis associated 1 [Source:HGNC Symbol;Acc:HGNC:24539]
ENSG00000089876.11	DHX32	protein_coding	4133.42	1.34142	3.98928e-10	1.45873e-08	101.044	DEAH-box helicase 32 (putative) [Source:HGNC Symbol;Acc:HGNC:16717]
ENSG00000089916.17	GPATCH2L	protein_coding	6266.69	0.721294	0.000585014	0.00369301	22.9618	G-patch domain containing 2 like [Source:HGNC Symbol;Acc:HGNC:20210]
ENSG00000090006.17	LTBP4	protein_coding	1955.18	0.905584	0.000451715	0.00296341	18.986	latent transforming growth factor beta binding protein 4 [Source:HGNC Symbol;Acc:HGNC:6717]
ENSG00000090266.12	NDUFB2	protein_coding	2215.05	-1.50527	1.38362e-10	5.49043e-09	52.0064	NADH:ubiquinone oxidoreductase subunit B2 [Source:HGNC Symbol;Acc:HGNC:7697]
ENSG00000090273.13	NUDC	protein_coding	2308.29	-0.946188	1.08983e-05	0.00012239	71.8563	nuclear distribution C, dynein complex regulator [Source:HGNC Symbol;Acc:HGNC:8045]
ENSG00000090339.8	ICAM1	protein_coding	310.697	1.32136	0.000172823	0.00132482	8.8589	intercellular adhesion molecule 1 [Source:HGNC Symbol;Acc:HGNC:5344]
ENSG00000090539.15	CHRD	protein_coding	107.415	1.41955	0.00707988	0.0288489	2.62045	chordin [Source:HGNC Symbol;Acc:HGNC:1949]
ENSG00000090612.20	ZNF268	protein_coding	2459.24	-0.755464	0.000772305	0.00466459	14.7297	zinc finger protein 268 [Source:HGNC Symbol;Acc:HGNC:13061]
ENSG00000090621.13	PABPC4	protein_coding	4090.6	0.644605	0.00206007	0.0106251	45.2994	poly(A) binding protein cytoplasmic 4 [Source:HGNC Symbol;Acc:HGNC:8557]
ENSG00000091136.13	LAMB1	protein_coding	383.958	-0.799824	0.00674896	0.0277491	4.53499	laminin subunit beta 1 [Source:HGNC Symbol;Acc:HGNC:6486]
ENSG00000091140.12	DLD	protein_coding	4597.01	-0.810109	0.000142219	0.00112458	74.2382	dihydrolipoamide dehydrogenase [Source:HGNC Symbol;Acc:HGNC:2898]
ENSG00000091164.12	TXNL1	protein_coding	3318.53	0.73102	0.00363015	0.0169329	23.4128	thioredoxin like 1 [Source:HGNC Symbol;Acc:HGNC:12436]
ENSG00000091317.7	CMTM6	protein_coding	4663.45	-0.690461	0.00264941	0.013026	89.3812	CKLF like MARVEL transmembrane domain containing 6 [Source:HGNC Symbol;Acc:HGNC:19177]
ENSG00000091409.14	ITGA6	protein_coding	1008.4	-0.832278	0.00640392	0.0265874	13.0859	integrin subunit alpha 6 [Source:HGNC Symbol;Acc:HGNC:6142]
ENSG00000091428.17	RAPGEF4	protein_coding	200.335	2.73824	7.53147e-12	3.79737e-10	4.34668	Rap guanine nucleotide exchange factor 4 [Source:HGNC Symbol;Acc:HGNC:16626]
ENSG00000091483.6	FH	protein_coding	1693.33	-1.18995	1.4187e-06	2.06811e-05	75.1756	fumarate hydratase [Source:HGNC Symbol;Acc:HGNC:3700]
ENSG00000091542.8	ALKBH5	protein_coding	9788.03	0.845626	6.41786e-05	0.000565573	233.96	alkB homolog 5, RNA demethylase [Source:HGNC Symbol;Acc:HGNC:25996]
ENSG00000091651.8	ORC6	protein_coding	758.9	-0.748466	0.00233297	0.0117236	15.4236	origin recognition complex subunit 6 [Source:HGNC Symbol;Acc:HGNC:17151]
ENSG00000091732.15	ZC3HC1	protein_coding	532.892	-1.29052	3.59532e-06	4.64259e-05	18.645	zinc finger C3HC-type containing 1 [Source:HGNC Symbol;Acc:HGNC:29913]
ENSG00000091844.7	RGS17	protein_coding	2152.49	1.45522	4.59902e-10	1.6448e-08	24.2123	regulator of G protein signaling 17 [Source:HGNC Symbol;Acc:HGNC:14088]
ENSG00000091947.9	TMEM101	protein_coding	1883.03	0.635204	0.00855002	0.0333823	47.5514	transmembrane protein 101 [Source:HGNC Symbol;Acc:HGNC:28653]
ENSG00000091986.15	CCDC80	protein_coding	141.411	1.7762	1.0193e-06	1.55542e-05	1.20559	coiled-coil domain containing 80 [Source:HGNC Symbol;Acc:HGNC:30649]
ENSG00000092094.10	OSGEP	protein_coding	1681.17	-0.586893	0.00888826	0.0344658	26.3656	O-sialoglycoprotein endopeptidase [Source:HGNC Symbol;Acc:HGNC:18028]
ENSG00000092201.9	SUPT16H	protein_coding	14138.3	-0.887329	2.35492e-05	0.000236982	173.28	SPT16 homolog, facilitates chromatin remodeling subunit [Source:HGNC Symbol;Acc:HGNC:11465]
ENSG00000092445.11	TYRO3	protein_coding	325.117	-1.07908	0.00108492	0.00622779	3.11292	TYRO3 protein tyrosine kinase [Source:HGNC Symbol;Acc:HGNC:12446]
ENSG00000092470.11	WDR76	protein_coding	861.277	-2.34526	1.50214e-09	4.74741e-08	24.5623	WD repeat domain 76 [Source:HGNC Symbol;Acc:HGNC:25773]
ENSG00000092531.9	SNAP23	protein_coding	1348.91	-0.700354	0.00191597	0.0100026	19.3416	synaptosome associated protein 23 [Source:HGNC Symbol;Acc:HGNC:11131]
ENSG00000092621.11	PHGDH	protein_coding	2537.05	-1.74544	0.0061468	0.0257384	86.1677	phosphoglycerate dehydrogenase [Source:HGNC Symbol;Acc:HGNC:8923]
ENSG00000092853.13	CLSPN	protein_coding	1204	-1.84943	0.00239889	0.0119841	30.2951	claspin [Source:HGNC Symbol;Acc:HGNC:19715]
ENSG00000092964.16	DPYSL2	protein_coding	7682.76	1.37814	4.40235e-08	9.5269e-07	94.876	dihydropyrimidinase like 2 [Source:HGNC Symbol;Acc:HGNC:3014]
ENSG00000092969.11	TGFB2	protein_coding	725.063	0.972545	0.0103325	0.0390221	14.4528	transforming growth factor beta 2 [Source:HGNC Symbol;Acc:HGNC:11768]
ENSG00000092978.10	GPATCH2	protein_coding	8000.81	-1.2902	7.44095e-08	1.49761e-06	88.074	G-patch domain containing 2 [Source:HGNC Symbol;Acc:HGNC:25499]
ENSG00000093000.18	NUP50	protein_coding	3277.55	-0.591981	0.00483635	0.0212785	30.7101	nucleoporin 50 [Source:HGNC Symbol;Acc:HGNC:8065]
ENSG00000093009.9	CDC45	protein_coding	1231.83	-2.36013	4.58601e-12	2.43133e-10	49.245	cell division cycle 45 [Source:HGNC Symbol;Acc:HGNC:1739]
ENSG00000093144.18	ECHDC1	protein_coding	2035.51	-0.767943	0.00172594	0.00919262	33.6232	ethylmalonyl-CoA decarboxylase 1 [Source:HGNC Symbol;Acc:HGNC:21489]
ENSG00000093167.17	LRRFIP2	protein_coding	4184.08	-0.689873	0.00231458	0.0116461	34.8957	LRR binding FLII interacting protein 2 [Source:HGNC Symbol;Acc:HGNC:6703]
ENSG00000093217.9	XYLB	protein_coding	167.027	-1.02753	0.00187773	0.00984829	2.87432	xylulokinase [Source:HGNC Symbol;Acc:HGNC:12839]
ENSG00000094804.9	CDC6	protein_coding	1477.18	-1.4478	0.000111548	0.000913822	34.3055	cell division cycle 6 [Source:HGNC Symbol;Acc:HGNC:1744]
ENSG00000094914.12	AAAS	protein_coding	2453.95	-0.745541	0.000852504	0.00507688	52.3848	aladin WD repeat nucleoporin [Source:HGNC Symbol;Acc:HGNC:13666]
ENSG00000094916.13	CBX5	protein_coding	19707	-1.10901	8.61491e-06	9.90208e-05	122.908	chromobox 5 [Source:HGNC Symbol;Acc:HGNC:1555]
ENSG00000095059.15	DHPS	protein_coding	7743.11	0.702304	0.013369	0.0480681	220.406	deoxyhypusine synthase [Source:HGNC Symbol;Acc:HGNC:2869]
ENSG00000095203.14	EPB41L4B	protein_coding	4167.52	1.14546	1.5618e-06	2.25155e-05	46.1444	erythrocyte membrane protein band 4.1 like 4B [Source:HGNC Symbol;Acc:HGNC:19818]
ENSG00000095303.14	PTGS1	protein_coding	50.3347	3.29635	1.66447e-09	5.16973e-08	1.36051	prostaglandin-endoperoxide synthase 1 [Source:HGNC Symbol;Acc:HGNC:9604]
ENSG00000095319.14	NUP188	protein_coding	6066.35	-0.931562	0.000195053	0.00146256	75.9078	nucleoporin 188 [Source:HGNC Symbol;Acc:HGNC:17859]
ENSG00000095321.16	CRAT	protein_coding	153.358	-1.13093	0.00140752	0.00773467	3.73913	carnitine O-acetyltransferase [Source:HGNC Symbol;Acc:HGNC:2342]
ENSG00000095383.19	TBC1D2	protein_coding	2301.72	1.0358	3.61816e-06	4.66592e-05	50.8203	TBC1 domain family member 2 [Source:HGNC Symbol;Acc:HGNC:18026]
ENSG00000095397.13	DFNB31	protein_coding	1295.43	1.33959	2.11672e-09	6.43003e-08	20.7523	whirlin [Source:HGNC Symbol;Acc:HGNC:16361]
ENSG00000095539.15	SEMA4G	protein_coding	116.49	1.62011	1.18903e-05	0.00013209	2.10495	semaphorin 4G [Source:HGNC Symbol;Acc:HGNC:10735]
ENSG00000095564.13	BTAF1	protein_coding	7509.06	0.764712	0.00175214	0.0093043	81.1982	B-TFIID TATA-box binding protein associated factor 1 [Source:HGNC Symbol;Acc:HGNC:17307]
ENSG00000095637.21	SORBS1	protein_coding	106.985	-1.76654	1.42713e-05	0.000154419	1.23548	sorbin and SH3 domain containing 1 [Source:HGNC Symbol;Acc:HGNC:14565]
ENSG00000095787.21	WAC	protein_coding	18330.8	0.732843	0.000506136	0.0032685	121.291	WW domain containing adaptor with coiled-coil [Source:HGNC Symbol;Acc:HGNC:17327]
ENSG00000095906.16	NUBP2	protein_coding	2190.78	-0.661161	0.00300007	0.0144914	37.6095	nucleotide binding protein 2 [Source:HGNC Symbol;Acc:HGNC:8042]
ENSG00000096006.11	CRISP3	protein_coding	262.534	-1.15023	0.000373905	0.00253017	12.6314	cysteine rich secretory protein 3 [Source:HGNC Symbol;Acc:HGNC:16904]
ENSG00000096060.14	FKBP5	protein_coding	1212.48	-1.21388	2.30501e-07	4.15602e-06	30.8525	FK506 binding protein 5 [Source:HGNC Symbol;Acc:HGNC:3721]
ENSG00000096063.14	SRPK1	protein_coding	5660.48	-0.672595	0.00565169	0.0241038	69.2211	SRSF protein kinase 1 [Source:HGNC Symbol;Acc:HGNC:11305]
ENSG00000096092.5	TMEM14A	protein_coding	848.635	-1.01228	0.000119408	0.000970893	84.6313	transmembrane protein 14A [Source:HGNC Symbol;Acc:HGNC:21076]
ENSG00000096696.13	DSP	protein_coding	103812	1.80302	2.44676e-19	3.3011e-17	1004.84	desmoplakin [Source:HGNC Symbol;Acc:HGNC:3052]
ENSG00000096968.12	JAK2	protein_coding	1845.39	-1.7836	4.84379e-10	1.72289e-08	37.9797	Janus kinase 2 [Source:HGNC Symbol;Acc:HGNC:6192]
ENSG00000097021.19	ACOT7	protein_coding	752.393	-1.45722	1.56044e-08	3.76874e-07	19.723	acyl-CoA thioesterase 7 [Source:HGNC Symbol;Acc:HGNC:24157]
ENSG00000099194.5	SCD	protein_coding	194709	2.31679	8.05595e-13	4.94039e-11	4284.3	stearoyl-CoA desaturase [Source:HGNC Symbol;Acc:HGNC:10571]
ENSG00000099204.18	ABLIM1	protein_coding	637.607	1.13726	1.42639e-05	0.000154419	6.26332	actin binding LIM protein 1 [Source:HGNC Symbol;Acc:HGNC:78]
ENSG00000099250.17	NRP1	protein_coding	3187.78	0.729085	0.00116293	0.00658288	25.5508	neuropilin 1 [Source:HGNC Symbol;Acc:HGNC:8004]
ENSG00000099251.14	HSD17B7P2	transcribed_unprocessed_pseudogene	228.698	1.16301	0.000165995	0.00127799	12.6582	hydroxysteroid 17-beta dehydrogenase 7 pseudogene 2 [Source:HGNC Symbol;Acc:HGNC:28120]
ENSG00000099625.12	CBARP	protein_coding	128.857	1.03308	0.012291	0.0449267	3.05956	CACN beta subunit associated regulatory protein [Source:HGNC Symbol;Acc:HGNC:28617]
ENSG00000099783.11	HNRNPM	protein_coding	4228.66	-1.00199	0.000486163	0.00316184	68.0911	heterogeneous nuclear ribonucleoprotein M [Source:HGNC Symbol;Acc:HGNC:5046]
ENSG00000099785.10	2002-03-01	protein_coding	325.678	-1.11905	0.000206631	0.0015366	13.9889	membrane associated ring-CH-type finger 2 [Source:HGNC Symbol;Acc:HGNC:28038]
ENSG00000099849.14	RASSF7	protein_coding	1975.69	1.02689	4.86589e-06	6.04774e-05	62.8231	Ras association domain family member 7 [Source:HGNC Symbol;Acc:HGNC:1166]
ENSG00000099860.8	GADD45B	protein_coding	3766.95	0.855182	0.00194143	0.0101065	147.878	growth arrest and DNA damage inducible beta [Source:HGNC Symbol;Acc:HGNC:4096]
ENSG00000099864.17	PALM	protein_coding	1258.89	1.41451	7.68531e-08	1.53887e-06	22.4161	paralemmin [Source:HGNC Symbol;Acc:HGNC:8594]
ENSG00000099875.14	MKNK2	protein_coding	6098.81	0.966469	5.42114e-05	0.000491217	98.9777	MAP kinase interacting serine/threonine kinase 2 [Source:HGNC Symbol;Acc:HGNC:7111]
ENSG00000099899.14	TRMT2A	protein_coding	1272.48	-0.720706	0.0020644	0.0106418	26.0788	tRNA methyltransferase 2 homolog A [Source:HGNC Symbol;Acc:HGNC:24974]
ENSG00000099901.16	RANBP1	protein_coding	3364.3	-1.14991	5.21283e-08	1.11209e-06	65.2884	RAN binding protein 1 [Source:HGNC Symbol;Acc:HGNC:9847]
ENSG00000099910.16	KLHL22	protein_coding	1055.12	-0.738901	0.00198849	0.0102933	19.5149	kelch like family member 22 [Source:HGNC Symbol;Acc:HGNC:25888]
ENSG00000099917.17	MED15	protein_coding	1790.39	0.702824	0.00165432	0.00886663	12.567	mediator complex subunit 15 [Source:HGNC Symbol;Acc:HGNC:14248]
ENSG00000099942.12	CRKL	protein_coding	7652.36	0.660331	0.00183603	0.00966221	103.187	CRK like proto-oncogene, adaptor protein [Source:HGNC Symbol;Acc:HGNC:2363]
ENSG00000099949.18	LZTR1	protein_coding	787.063	-1.15392	0.000212879	0.00157808	10.5689	leucine zipper like transcription regulator 1 [Source:HGNC Symbol;Acc:HGNC:6742]
ENSG00000099968.17	BCL2L13	protein_coding	5065.93	0.907021	6.39802e-05	0.000565077	54.8515	BCL2 like 13 [Source:HGNC Symbol;Acc:HGNC:17164]
ENSG00000099974.7	DDTL	protein_coding	75.1103	1.40003	0.0011062	0.00631865	4.71407	D-dopachrome tautomerase like [Source:HGNC Symbol;Acc:HGNC:33446]
ENSG00000099977.13	DDT	protein_coding	1270.25	1.05385	1.26949e-05	0.000139995	60.4146	D-dopachrome tautomerase [Source:HGNC Symbol;Acc:HGNC:2732]
ENSG00000099994.10	SUSD2	protein_coding	384.295	-2.45302	1.52011e-16	1.55696e-14	8.69541	sushi domain containing 2 [Source:HGNC Symbol;Acc:HGNC:30667]
ENSG00000100003.17	SEC14L2	protein_coding	79.9048	1.37604	0.00297439	0.0143851	1.34967	SEC14 like lipid binding 2 [Source:HGNC Symbol;Acc:HGNC:10699]
ENSG00000100028.11	SNRPD3	protein_coding	4208.15	-0.782128	0.00026625	0.00190305	144.303	small nuclear ribonucleoprotein D3 polypeptide [Source:HGNC Symbol;Acc:HGNC:11160]
ENSG00000100034.13	PPM1F	protein_coding	1021.95	-0.866041	0.000682682	0.00419714	9.59557	protein phosphatase, Mg2+/Mn2+ dependent 1F [Source:HGNC Symbol;Acc:HGNC:19388]
ENSG00000100060.17	MFNG	protein_coding	22.7993	1.65519	0.00893417	0.0346166	1.17612	MFNG O-fucosylpeptide 3-beta-N-acetylglucosaminyltransferase [Source:HGNC Symbol;Acc:HGNC:7038]
ENSG00000100097.11	LGALS1	protein_coding	8325.53	1.71501	1.09666e-08	2.74698e-07	836.858	galectin 1 [Source:HGNC Symbol;Acc:HGNC:6561]
ENSG00000100109.16	TFIP11	protein_coding	2307.08	-0.78367	0.00030236	0.00211479	36.1742	tuftelin interacting protein 11 [Source:HGNC Symbol;Acc:HGNC:17165]
ENSG00000100116.16	GCAT	protein_coding	410.085	-1.19225	1.50042e-05	0.000161279	18.8157	glycine C-acetyltransferase [Source:HGNC Symbol;Acc:HGNC:4188]
ENSG00000100162.14	CENPM	protein_coding	407.832	-2.29232	5.85902e-16	5.48421e-14	27.64	centromere protein M [Source:HGNC Symbol;Acc:HGNC:18352]
ENSG00000100219.16	XBP1	protein_coding	54653	-0.813508	0.00406174	0.0184996	1565.58	X-box binding protein 1 [Source:HGNC Symbol;Acc:HGNC:12801]
ENSG00000100228.12	RAB36	protein_coding	206.752	-2.07909	5.79303e-10	2.02735e-08	6.16299	RAB36, member RAS oncogene family [Source:HGNC Symbol;Acc:HGNC:9775]
ENSG00000100239.15	PPP6R2	protein_coding	1589.72	-0.589557	0.0101547	0.038477	23.6387	protein phosphatase 6 regulatory subunit 2 [Source:HGNC Symbol;Acc:HGNC:19253]
ENSG00000100242.15	SUN2	protein_coding	2463.59	0.731592	0.000819858	0.00492141	28.5089	Sad1 and UNC84 domain containing 2 [Source:HGNC Symbol;Acc:HGNC:14210]
[truncated: 3,973 more rows]

## Sheet: both_DEGs
GENCODE_gene_id	gene_name	gene_type	A549.baseMean	A549.log2FoldChange	A549.pvalue	A549.padj	A549.maxTPM	MCF-7.baseMean	MCF-7.log2FoldChange	MCF-7.pvalue	MCF-7.padj	MCF-7.maxTPM	description
[truncated: 1,224 more rows]
