# Supplementary material
Source: HighWire-hosted journal article supplement (doi:10.1101/rna.073353.119)
Supplement: Supplemental_Tab_S2.xlsx [file Supplemental_Tab_S2.xlsx]

## Sheet: Legend
Supplementary Table 2. Alternative splicing events in A549 and MCF-7 cells under hypoxia.
Alternative splicing events were detected using rMATS considering only reads mapped to splice junctions, and filtered for a false discovery rate (FDR) < 0.05
and an absolute change in ‘percent spliced in’ (|ΔPSI|) ≥ 10% (referred to as inclusion level difference, ‘IncLevelDifference’) (for additional criteria, see Material and Methods).
Information is given for cassette exons (CE), mutually exclusive exons (MXE), alternative 5’ splice sites (A5SS), alternative 3’ splice sites (A3SS), and retained introns (RI) that are regulated in A549 (blue), MCF-7 (red) or both.
0-based coordinates are given for the alternative exon (exonStart/End), and the upstream (upstreamES/E) and downstream exons (downstreamES/E).
IJC and SJC provide comma-separated numbers of inclusion and skipping junction reads for all replicates of a given sample.

## Sheet: A549_CE
GENCODE_GeneID	geneSymbol	chr	strand	exonStart_0base	exonEnd	upstreamES	upstreamEE	downstreamES	downstreamEE	IJC_SAMPLE_1	SJC_SAMPLE_1	IJC_SAMPLE_2	SJC_SAMPLE_2	FDR	IncLevel1	IncLevel2	A549.IncLevelDifference
ENSG00000103591.12	AAGAB	chr15	-	67231229	67231332	67226698	67226950	67231813	67231897	15,13	3,3	10,15	1,0	0.0394734	0.714,0.684	0.833,1.0	-0.217
ENSG00000150967.17	ABCB9	chr12	-	122940806	122940995	122940110	122940284	122944390	122944519	20,9	1,4	20,27	0,0	0.019641	0.909,0.529	1.0,1.0	-0.281
ENSG00000103222.18	ABCC1	chr16	+	16016583	16016621	16014539	16014628	16033108	16033170	43,28	1,1	45,57	6,8	0.0408652	0.966,0.948	0.831,0.823	0.13
ENSG00000136754.16	ABI1	chr10	-	26771074	26771089	26770244	26770345	26777064	26777241	23,21	97126	3,5	73118	0.00073495	0.165,0.122	0.033,0.034	0.11
ENSG00000143322.19	ABL2	chr1	-	179117331	179117516	179114877	179115030	179118586	179118764	46,44	5,2	26,43	0,0	0.0192998	0.821,0.917	1.0,1.0	-0.131
ENSG00000099204.18	ABLIM1	chr10	-	114473878	114473956	114472976	114473132	114487957	114488016	106186	2,2	122208	7,20	0.00196767	0.964,0.979	0.897,0.839	0.104
ENSG00000196295.11	AC005154.6	chr7	-	30561465	30562128	30552099	30552179	30563730	30563888	4,21	0,0	5,3	3,3	7.0737e-05	1.0,1.0	0.455,0.333	0.606
ENSG00000196295.11	AC005154.6	chr7	-	30579230	30579314	30568832	30568989	30585329	30585479	2,26	0,0	4,6	3,1	0.018147	1.0,1.0	0.4,0.75	0.425
ENSG00000231312.6	AC007246.3	chr2	+	39518582	39518710	39516413	39516541	39599365	39601344	4,25	0,0	12,20	0,6	0.018696	1.0,1.0	1.0,0.625	0.188
ENSG00000238045.9	AC009133.12	chr16	-	29820183	29820337	29819539	29819601	29820877	29821252	0,1	11,7	1,5	2,2	0.0133032	0.0,0.067	0.2,0.556	-0.345
ENSG00000225205.5	AC093818.1	chr2	-	172496131	172496226	172495374	172495516	172512333	172512518	3,8	34,2	0,0	2,1	0.026474	0.042,0.667	0.0,0.0	0.355
ENSG00000152117.17	AC093838.4	chr2	+	131519813	131519942	131519534	131519666	131520096	131520421	0,0	10,18	3,5	4,13	0.00373494	0.0,0.0	0.273,0.161	-0.217
ENSG00000181513.14	ACBD4	chr17	+	45137018	45137139	45136691	45136776	45137367	45137454	133,99	12,11	76131	3,3	0.0445448	0.847,0.818	0.927,0.956	-0.109
ENSG00000100813.14	ACIN1	chr14	-	23089981	23090101	23081747	23081836	23090521	23090633	63100	33,43	60,58	47,63	0.0391732	0.488,0.538	0.39,0.315	0.16
ENSG00000131473.16	ACLY	chr17	-	41896619	41896649	41893032	41893174	41897748	41897839	608691	336413	9981103	315323	3.17254e-05	0.561,0.542	0.691,0.707	-0.147
ENSG00000161533.11	ACOX1	chr17	-	75960214	75960375	75957458	75957566	75978533	75978693	104131	11,8	116131	2,0	0.00071735	0.825,0.891	0.967,1.0	-0.126
ENSG00000161533.11	ACOX1	chr17	-	75973624	75973785	75957458	75957566	75978533	75978693	66118	11,8	70,75	2,0	0.0041769	0.75,0.881	0.946,1.0	-0.157
ENSG00000133627.17	ACTR3B	chr7	+	152811696	152811733	152801620	152801731	152814549	152814645	16,11	8,8	16,12	29,44	0.0128861	0.569,0.476	0.267,0.153	0.312
ENSG00000196839.12	ADA	chr20	-	44623006	44623078	44622828	44622930	44624201	44624329	78100	0,0	101155	9,5	0.00311168	1.0,1.0	0.849,0.939	0.106
ENSG00000143537.13	ADAM15	chr1	+	155061414	155061489	155060762	155060832	155061903	155062117	4,18	0,2	1,8	3,5	0.018028	1.0,0.818	0.143,0.444	0.616
ENSG00000143537.13	ADAM15	chr1	+	155061417	155061489	155060762	155060832	155061903	155061975	4,17	0,2	2,7	3,5	0.0187016	1.0,0.81	0.25,0.412	0.574
ENSG00000008277.14	ADAM22	chr7	+	87964633	87964684	87935025	87935186	87978335	87978412	0,0	15,7	3,2	3,2	0.00670596	0.0,0.0	0.368,0.368	-0.368
ENSG00000197140.14	ADAM32	chr8	+	39169915	39169997	39165029	39165196	39211143	39211324	5,15	0,0	6,3	1,3	0.0157025	1.0,1.0	0.75,0.333	0.459
ENSG00000197140.14	ADAM32	chr8	+	39167797	39167961	39165029	39165196	39169915	39169997	0,2	5,15	6,3	5,3	0.0157146	0.0,0.063	0.375,0.333	-0.323
ENSG00000197140.14	ADAM32	chr8	+	39160900	39160965	39151376	39151548	39164763	39164835	27,11	1,0	16,11	3,2	0.0475208	0.934,1.0	0.736,0.742	0.228
ENSG00000160323.18	ADAMTS13	chr9	+	133457909	133458094	133456542	133456719	133458973	133459402	0,0	7,5	1,8	2,1	0.00217813	0.0,0.0	0.2,0.8	-0.5
ENSG00000197381.15	ADARB1	chr21	+	45184473	45184593	45183361	45183510	45184922	45185091	15,9	1,0	5,3	2,5	0.00174619	0.882,1.0	0.556,0.231	0.548
ENSG00000065457.10	ADAT1	chr16	-	75618585	75618698	75617141	75617272	75620265	75620334	61,56	0,0	58,72	5,3	0.0201191	1.0,1.0	0.853,0.923	0.112
ENSG00000063761.15	ADCK1	chr14	+	77856315	77856349	77822434	77822518	77859075	77859279	6,0	10,4	0,0	17,2	0.0244475	0.29,0.0	0.0,0.0	0.145
ENSG00000123146.19	ADGRE5	chr19	+	14397076	14397223	14396249	14396473	14397657	14397804	0,2	13,8	4,9	1,2	2.17102e-05	0.0,0.111	0.667,0.692	-0.624
ENSG00000123146.19	ADGRE5	chr19	+	14396341	14396473	14390923	14391079	14397657	14397804	29,19	21,31	4,7	25,24	0.0146953	0.408,0.235	0.074,0.127	0.221
ENSG00000112414.14	ADGRG6	chr6	+	142383759	142383843	142381950	142382019	142390257	142390343	62154	68,49	193292	30,41	0.0110865	0.313,0.611	0.763,0.781	-0.31
ENSG00000100077.14	ADRBK2	chr22	+	25644591	25644665	25604376	25604453	25661575	25661677	16,15	0,0	27,19	2,4	0.00891065	1.0,1.0	0.871,0.704	0.213
ENSG00000169129.14	AFAP1L2	chr10	-	114341673	114341795	114340602	114340731	114362947	114363172	0,0	23,3	2,2	1,0	0.00113574	0.0,0.0	0.5,1.0	-0.75
ENSG00000169129.14	AFAP1L2	chr10	-	114362947	114363172	114340602	114340731	114404439	114404756	23,5	6,16	1,0	4,6	0.0122776	0.657,0.135	0.111,0.0	0.341
ENSG00000223959.8	AFG3L1P	chr16	+	89978809	89978878	89977693	89977802	89980241	89980336	54,32	0,0	35,58	8,6	0.000278099	1.0,1.0	0.689,0.831	0.24
ENSG00000092847.11	AGO1	chr1	+	35892556	35892677	35888426	35888610	35893096	35893278	45,57	6,3	48,61	0,0	0.0041732	0.789,0.905	1.0,1.0	-0.153
ENSG00000135541.20	AHI1	chr6	-	135297431	135297492	135285294	135285647	135300499	135300532	0,0	20,10	2,8	25,15	0.011899	0.0,0.0	0.041,0.223	-0.132
ENSG00000135541.20	AHI1	chr6	-	135495813	135495898	135492227	135492291	135497187	135497247	5,6	9,5	15,23	3,4	0.0136478	0.217,0.375	0.714,0.742	-0.432
ENSG00000063438.16	AHRR	chr5	+	311292	311398	304175	304221	314416	314596	0,0	15,5	3,2	2,8	0.0497447	0.0,0.0	0.429,0.111	-0.27
ENSG00000166452.11	AKIP1	chr11	+	8917286	8917367	8914825	8914930	8919336	8919862	132181	12,4	222247	38,30	0.0139686	0.846,0.958	0.745,0.805	0.127
ENSG00000151632.16	AKR1C2	chr10	-	4999185	4999417	4998624	4998747	5000549	5000666	45,61	15,12	13,28	42,34	6.0237e-06	0.6,0.718	0.134,0.292	0.446
ENSG00000151632.16	AKR1C2	chr10	-	4999185	4999273	4998624	4998747	5000549	5000666	48,64	15,12	17,31	42,34	9.15523e-06	0.615,0.727	0.168,0.313	0.431
ENSG00000151632.16	AKR1C2	chr10	-	4999273	4999277	4998624	4998747	5000549	5000666	67,72	15,12	51,64	42,34	0.00114752	0.811,0.852	0.538,0.643	0.241
ENSG00000151632.16	AKR1C2	chr10	-	5006475	5006592	5005994	5006052	5007406	5007506	47,62	0,0	36,53	2,7	0.00267566	1.0,1.0	0.9,0.791	0.154
ENSG00000151632.16	AKR1C2	chr10	-	5006457	5006592	5005994	5006052	5007406	5007506	43,57	0,0	35,51	2,7	0.00277044	1.0,1.0	0.897,0.785	0.159
ENSG00000151632.16	AKR1C2	chr10	-	5006458	5006592	5005994	5006052	5007406	5007506	42,57	0,0	35,52	2,7	0.0028679	1.0,1.0	0.897,0.788	0.157
ENSG00000101901.10	ALG13	chrX	+	111708026	111708393	111689086	111689197	111708964	111709048	5,14	8,5	11,12	0,1	0.00162931	0.238,0.583	1.0,0.857	-0.518
ENSG00000262943.7	ALOX12P2	chr17	+	6898799	6898929	6898528	6898698	6899390	6899461	7,14	0,5	9,10	0,0	0.0325532	1.0,0.583	1.0,1.0	-0.209
ENSG00000162066.14	AMDHD2	chr16	+	2527572	2527615	2520983	2521123	2527772	2527836	37,17	0,0	35,18	3,3	0.0290088	1.0,1.0	0.879,0.789	0.166
ENSG00000101935.9	AMMECR1	chrX	-	110264488	110264599	110216517	110216632	110317598	110317849	20,69	0,1	59,86	6,5	0.020548	1.0,0.972	0.831,0.896	0.123
ENSG00000144233.9	AMMECR1L	chr2	-	127872985	127873077	127871248	127871359	127873827	127874272	0,0	14,24	2,6	23,16	0.02764	0.0,0.0	0.042,0.158	-0.1
ENSG00000166025.17	AMOTL1	chr11	+	94795010	94795160	94768370	94768560	94799389	94799539	47,85	0,2	55,56	4,6	0.036167	1.0,0.955	0.873,0.824	0.129
ENSG00000013523.9	ANGEL1	chr14	-	76804374	76804415	76803785	76803912	76806415	76806515	7,2	15,25	0,1	19,27	0.0220345	0.229,0.048	0.0,0.023	0.127
ENSG00000029534.19	ANK1	chr8	-	41661875	41661941	41655323	41655753	41663658	41663742	32,21	9,0	5,7	0,0	0.0188241	0.648,1.0	1.0,1.0	-0.176
ENSG00000029534.19	ANK1	chr8	-	41661800	41661941	41653219	41655753	41663658	41663742	55,54	9,0	13,21	0,0	0.0290088	0.753,1.0	1.0,1.0	-0.123
ENSG00000088448.14	ANKRD10	chr13	-	110903471	110903539	110900529	110900694	110906032	110906095	4,9	6,8	10,9	1,1	0.0107816	0.254,0.365	0.836,0.821	-0.519
ENSG00000172932.14	ANKRD13D	chr11	+	67290591	67290716	67290321	67290446	67291475	67291521	24,17	20,17	8,17	33,34	0.0320476	0.375,0.333	0.108,0.2	0.2
ENSG00000107890.16	ANKRD26	chr10	-	27029285	27029356	27028851	27028945	27033224	27033377	47,89	6,1	67,94	0,0	0.0337579	0.797,0.978	1.0,1.0	-0.113
ENSG00000064999.13	ANKS1A	chr6	+	34972580	34972643	34970009	34970166	34981689	34981986	3,1	37,30	5,11	20,29	0.0191143	0.041,0.017	0.117,0.167	-0.113
ENSG00000168096.14	ANKS3	chr16	-	4726658	4726780	4724749	4724831	4729979	4730151	30,27	0,0	12,13	4,7	1.16345e-05	1.0,1.0	0.6,0.481	0.46
ENSG00000168096.14	ANKS3	chr16	-	4726978	4727177	4724749	4724831	4729979	4730151	40,39	0,0	48,43	4,7	0.00147077	1.0,1.0	0.857,0.754	0.195
ENSG00000160746.12	ANO10	chr3	-	43551471	43551588	43549719	43549848	43555277	43555411	13,5	26,27	1,3	41,60	0.00154133	0.2,0.085	0.012,0.024	0.125
ENSG00000160746.12	ANO10	chr3	-	43551471	43551566	43549719	43549848	43555277	43555469	13,5	26,27	2,3	41,60	0.00429362	0.2,0.085	0.024,0.024	0.119
ENSG00000182718.16	ANXA2	chr15	-	60396150	60396427	60386027	60386086	60397942	60397986	12,20	11,9	19,17	1,2	0.00912081	0.353,0.526	0.905,0.81	-0.418
ENSG00000182718.16	ANXA2	chr15	-	60390212	60390317	60386027	60386086	60397942	60398001	5,24	11,9	21,16	1,2	0.0129005	0.185,0.571	0.913,0.8	-0.479
ENSG00000182718.16	ANXA2	chr15	-	60397261	60397338	60386027	60386086	60397942	60397986	14,24	11,9	13,20	1,2	0.0304961	0.389,0.571	0.867,0.833	-0.37
ENSG00000196975.15	ANXA4	chr2	+	69810593	69810780	69807977	69808189	69812652	69812708	22,16	6,0	3,9	0,0	0.0217649	0.647,1.0	1.0,1.0	-0.176
ENSG00000138356.13	AOX1	chr2	+	200611383	200611493	200609320	200609414	200612608	200612793	10,20	3,12	2,14	0,1	0.00803631	0.625,0.455	1.0,0.875	-0.397
ENSG00000166747.12	AP1G1	chr16	-	71808504	71808677	71807800	71808150	71808762	71809103	16,4	0,0	5,7	4,4	8.23903e-05	1.0,1.0	0.385,0.467	0.574
ENSG00000182287.13	AP1S2	chrX	-	15833443	15833524	15831105	15831568	15845378	15845516	1,11	16,22	10,17	5,13	0.0190108	0.03,0.2	0.5,0.395	-0.333
ENSG00000120868.13	APAF1	chr12	+	98659446	98659538	98659159	98659343	98662455	98662568	3,9	18,15	0,0	2,4	0.0202879	0.077,0.231	0.0,0.0	0.154
ENSG00000175279.21	APITD1	chr1	+	10431152	10431401	10430442	10430568	10433841	10433965	8,12	3,4	13,9	24,13	0.0335775	0.571,0.6	0.213,0.257	0.35
ENSG00000105290.11	APLP1	chr19	+	35869748	35869810	35868562	35868783	35870895	35871028	33,27	7,0	21,54	0,0	0.0152679	0.716,1.0	1.0,1.0	-0.142
ENSG00000105290.11	APLP1	chr19	+	35869666	35869810	35868444	35868783	35870895	35871028	56,56	7,0	29,77	0,0	0.0283496	0.8,1.0	1.0,1.0	-0.1
ENSG00000142192.20	APP	chr21	-	25997359	25997416	25982343	25982477	26021839	26022042	469495	25,71	87227	20,52	0.00732205	0.912,0.795	0.707,0.708	0.146
ENSG00000164144.14	ARFIP1	chr4	+	152870752	152870848	152863605	152863714	152872451	152872564	133118	21,41	114152	81,83	0.0142326	0.76,0.59	0.413,0.478	0.23
ENSG00000164144.14	ARFIP1	chr4	+	152790758	152790875	152779970	152780091	152829624	152829726	5,9	20,18	2,2	31,28	0.0294091	0.111,0.2	0.031,0.034	0.123
ENSG00000187951.10	ARHGAP11B	chr15	+	30658765	30658844	30647667	30647714	30716219	30716342	0,2	5,11	12,6	7,8	0.00727555	0.0,0.083	0.462,0.273	-0.326
ENSG00000145819.15	ARHGAP26	chr5	+	143147230	143147381	143133966	143134105	143213996	143214088	21,59	6,7	42,80	1,1	0.00332484	0.636,0.808	0.955,0.976	-0.244
ENSG00000132694.18	ARHGEF11	chr1	-	156971696	156971816	156969997	156970043	156976982	156977054	57,56	32,36	69,78	16,24	0.0353792	0.471,0.438	0.683,0.619	-0.197
ENSG00000240771.6	ARHGEF25	chr12	+	57615236	57615314	57614966	57615017	57615511	57615712	53,38	11,1	37,25	0,0	0.00403305	0.707,0.95	1.0,1.0	-0.171
ENSG00000049618.21	ARID1B	chr6	+	157036834	157036876	156935465	156935576	157084661	157084905	13,13	2,6	10,12	14,18	0.0415687	0.804,0.577	0.311,0.296	0.387
ENSG00000169379.15	ARL13B	chr3	+	93997079	93997301	93995873	93995944	94003658	94003908	0,0	5,6	5,3	13,5	0.0129844	0.0,0.0	0.161,0.231	-0.196
ENSG00000170632.13	ARMC10	chr7	+	103092476	103092653	103086629	103086764	103098298	103099749	12,15	3,3	11,11	17,16	0.00388557	0.667,0.714	0.244,0.256	0.441
ENSG00000170632.13	ARMC10	chr7	+	103097276	103097348	103086629	103086764	103098298	103098863	125136	3,3	193164	17,16	0.00908084	0.954,0.958	0.85,0.837	0.113
ENSG00000238021.6	ARMC4P1	chr10	+	27281287	27281383	27262956	27263214	27288676	27288824	7,3	3,7	3,6	1,0	0.0176037	0.538,0.176	0.6,1.0	-0.443
ENSG00000114098.17	ARMC8	chr3	+	138209816	138209893	138188454	138188530	138221925	138221997	44,64	0,0	49,42	7,5	0.000308476	1.0,1.0	0.778,0.808	0.207
ENSG00000153317.14	ASAP1	chr8	-	130091972	130092143	130079901	130079971	130112093	130112322	146171	37,33	163190	12,26	0.0486126	0.664,0.722	0.872,0.785	-0.135
ENSG00000065802.11	ASB1	chr2	+	238435710	238436013	238433548	238433695	238444341	238444375	50,40	0,1	30,43	7,9	0.000113235	1.0,0.952	0.682,0.705	0.282
ENSG00000065802.11	ASB1	chr2	+	238435710	238435863	238433313	238433695	238444341	238444375	17,13	0,1	13,22	7,9	0.000826098	1.0,0.867	0.481,0.55	0.418
ENSG00000267080.5	ASB16-AS1	chr17	-	44182929	44183093	44181622	44181720	44186564	44186671	17,16	0,0	2,10	5,4	1.66561e-05	1.0,1.0	0.167,0.556	0.638
ENSG00000177981.10	ASB8	chr12	-	48150086	48150140	48149528	48149998	48151200	48151305	5,11	31,35	2,0	43,38	0.00218559	0.084,0.152	0.026,0.0	0.105
ENSG00000213199.7	ASIC3	chr7	+	151051171	151051319	151051038	151051095	151051809	151051900	17,9	1,4	4,4	7,5	0.046509	0.895,0.529	0.222,0.286	0.458
ENSG00000198363.15	ASPH	chr8	-	61637959	61638003	61618977	61619019	61642887	61642920	6,21	0,0	15,36	2,4	0.0391439	1.0,1.0	0.823,0.848	0.165
ENSG00000066279.16	ASPM	chr1	-	197100430	197105185	197095997	197096164	197117788	197117983	50,86	1,22	116115	59,63	0.0222476	0.962,0.662	0.496,0.477	0.326
ENSG00000171456.16	ASXL1	chr20	+	32429900	32430053	32429337	32429431	32431320	32431484	67,85	2,12	63,60	19,27	0.00485078	0.944,0.78	0.624,0.526	0.287
ENSG00000119778.14	ATAD2B	chr2	-	23863380	23863555	23857414	23857503	23864808	23864924	24,22	0,6	35,32	0,0	0.0243203	1.0,0.647	1.0,1.0	-0.176
ENSG00000115966.16	ATF2	chr2	-	175092542	175092616	175080659	175080765	175093060	175093267	0,3	31,56	9,15	49,34	0.000820548	0.0,0.026	0.084,0.181	-0.12
ENSG00000152348.15	ATG10	chr5	+	81981308	81981417	81976192	81976327	81987558	81987678	0,0	12,28	5,4	7,22	0.00582535	0.0,0.0	0.263,0.083	-0.173
ENSG00000152348.15	ATG10	chr5	+	82164398	82164537	82058494	82058602	82178489	82178587	64108	6,7	67,71	0,1	0.0058657	0.842,0.885	1.0,0.973	-0.123
ENSG00000198925.10	ATG9A	chr2	-	219229009	219229174	219228433	219228485	219229534	219229618	57,59	17,4	73,64	1,3	0.0234471	0.626,0.881	0.973,0.914	-0.19
ENSG00000133657.14	ATP13A3	chr3	-	194425341	194425412	194402679	194406116	194427074	194427252	2,0	5,5	1,3	0,0	4.43883e-08	0.167,0.0	1.0,1.0	-0.916
ENSG00000133657.14	ATP13A3	chr3	-	194413758	194413839	194402671	194406116	194427074	194427252	69,77	5,5	30,37	0,0	0.012467	0.873,0.885	1.0,1.0	-0.121
ENSG00000125375.14	ATP5S	chr14	+	50323944	50324116	50322510	50322806	50325608	50325677	9,15	0,0	10,4	3,1	0.0162842	1.0,1.0	0.625,0.667	0.354
ENSG00000123191.14	ATP7B	chr13	-	51946283	51946478	51944108	51944291	51949661	51949796	11,4	0,0	13,12	3,6	0.000450345	1.0,1.0	0.684,0.5	0.408
ENSG00000171953.15	ATPAF2	chr17	-	18021421	18021538	18021122	18021238	18021744	18021857	0,0	14,12	3,8	10,14	0.00171443	0.0,0.0	0.13,0.222	-0.176
ENSG00000107518.16	ATRNL1	chr10	+	115241570	115241725	115215696	115215880	115265192	115265277	8,19	0,0	6,3	2,3	0.000754313	1.0,1.0	0.6,0.333	0.533
ENSG00000168488.18	ATXN2L	chr16	+	28832473	28832567	28832204	28832399	28832816	28832887	22,38	1,0	55,58	4,7	0.0269894	0.917,1.0	0.873,0.806	0.119
ENSG00000163635.17	ATXN7	chr3	+	63913156	63913225	63912587	63912923	63952378	63952483	43,29	0,6	33,59	0,0	0.0374706	1.0,0.71	1.0,1.0	-0.145
ENSG00000148090.11	AUH	chr9	-	91343985	91344110	91325317	91325404	91355882	91355970	10,9	21,31	4,2	37,40	0.0195554	0.192,0.127	0.051,0.024	0.122
ENSG00000103126.14	AXIN1	chr16	-	291189	291297	289439	289607	293487	293718	53,38	14,20	15,33	27,28	0.0422516	0.654,0.487	0.217,0.371	0.277
ENSG00000168646.12	AXIN2	chr17	-	65536868	65537063	65536319	65536553	65537323	65537835	0,7	3,12	19,16	6,6	0.0199322	0.0,0.226	0.613,0.571	-0.479
ENSG00000138376.10	BARD1	chr2	-	214780559	214781509	214769231	214769312	214792296	214792445	56,66	0,1	52,45	8,5	0.000761759	1.0,0.971	0.765,0.818	0.194
ENSG00000138376.10	BARD1	chr2	-	214752446	214752555	214745721	214745854	214767481	214767654	20,38	6,0	41,52	0,0	0.0324358	0.625,1.0	1.0,1.0	-0.188
ENSG00000087088.19	BAX	chr19	+	48955547	48955599	48954928	48954962	48956197	48956333	11,6	0,0	8,14	0,5	0.0373991	1.0,1.0	1.0,0.618	0.191
ENSG00000119636.15	BBOF1	chr14	+	74034027	74034171	74029183	74029249	74040564	74040645	34,31	0,0	35,35	6,3	0.00267414	1.0,1.0	0.745,0.854	0.201
ENSG00000183337.16	BCOR	chrX	-	40071636	40071690	40070972	40071159	40072348	40075180	41,30	1,6	38,50	16,26	0.0130273	0.959,0.74	0.575,0.523	0.3
ENSG00000125864.11	BFSP1	chr20	-	17514664	17514816	17511975	17512068	17524847	17524908	49,26	0,0	13,5	5,0	0.0294002	1.0,1.0	0.565,1.0	0.218
ENSG00000168487.17	BMP1	chr8	+	22196180	22196197	22195461	22195587	22196679	22196840	14,6	33,90	1,0	52,41	0.00149013	0.257,0.051	0.015,0.0	0.146
ENSG00000140299.11	BNIP2	chr15	-	59668102	59668138	59663378	59664120	59668891	59668990	98,89	132217	42,45	182183	0.00416465	0.331,0.215	0.133,0.141	0.136
ENSG00000136122.15	BORA	chr13	+	72734959	72735005	72731280	72731387	72737961	72738043	19,23	0,0	49,41	5,4	0.0122784	1.0,1.0	0.856,0.862	0.141
ENSG00000136122.15	BORA	chr13	+	72734959	72735005	72728925	72729093	72737961	72738043	17,20	0,2	25,27	5,8	0.0464852	1.0,0.859	0.753,0.673	0.216
ENSG00000162813.17	BPNT1	chr1	-	220066072	220066117	220059685	220059791	220067301	220067393	0,1	7,3	2,5	2,0	0.00282944	0.0,0.17	0.38,1.0	-0.605
ENSG00000171634.16	BPTF	chr17	+	67875555	67875744	67874816	67875020	67891843	67892034	113182	10,15	79117	25,34	0.000237367	0.85,0.858	0.612,0.632	0.232
ENSG00000171634.16	BPTF	chr17	+	67875555	67875744	67874816	67875020	67886127	67886316	104173	12,18	96143	32,47	0.000531652	0.813,0.828	0.6,0.603	0.219
ENSG00000157764.12	BRAF	chr7	-	140734616	140734770	140719326	140726516	140739811	140739946	31,46	0,4	54,43	12,12	0.0195585	1.0,0.852	0.692,0.642	0.259
ENSG00000012048.20	BRCA1	chr17	-	43106477	43106533	43104867	43104956	43115725	43115779	25,18	0,0	53,40	4,3	0.0439534	1.0,1.0	0.881,0.882	0.119
ENSG00000112983.17	BRD8	chr5	-	138168469	138168688	138167933	138168078	138169221	138169358	92168	2,2	149146	20,13	0.000220911	0.958,0.977	0.788,0.849	0.149
ENSG00000112983.17	BRD8	chr5	-	138163586	138163643	138163129	138163344	138164319	138164413	3,3	4,14	0,0	11,10	0.0275831	0.294,0.106	0.0,0.0	0.2
ENSG00000174672.15	BRSK2	chr11	+	1444970	1445002	1443488	1443635	1445293	1445458	29,22	7,4	16,25	0,0	0.00112593	0.742,0.792	1.0,1.0	-0.233
ENSG00000148925.10	BTBD10	chr11	-	13445023	13445153	13421746	13421838	13463091	13463297	81,60	26,14	33,56	28,39	0.0074503	0.609,0.682	0.371,0.418	0.251
ENSG00000148925.10	BTBD10	chr11	-	13445023	13445148	13421746	13421838	13463091	13463297	78,60	26,14	32,56	28,39	0.00949523	0.6,0.682	0.364,0.418	0.25
ENSG00000148925.10	BTBD10	chr11	-	13445023	13445181	13421641	13421838	13463091	13463297	126,98	26,14	71101	28,39	0.0315484	0.708,0.778	0.559,0.564	0.181
ENSG00000132640.14	BTBD3	chr20	+	11919147	11919176	11918333	11918601	11919717	11919836	20,26	0,0	22,27	2,5	0.0110888	1.0,1.0	0.887,0.794	0.159
ENSG00000134717.17	BTF3L4	chr1	+	52083339	52083541	52064824	52064938	52086111	52086171	120114	0,8	85139	18,13	0.0142326	1.0,0.877	0.702,0.842	0.166
ENSG00000112763.15	BTN2A1	chr6	+	26458606	26458718	26457921	26458142	26459480	26459828	50,37	0,0	28,25	7,6	1.87104e-05	1.0,1.0	0.667,0.676	0.329
ENSG00000112763.15	BTN2A1	chr6	+	26462796	26462897	26459480	26459828	26463243	26463525	0,3	17,42	4,13	26,30	0.0163736	0.0,0.034	0.071,0.178	-0.107
ENSG00000149196.15	C11orf73	chr11	+	86326512	86326676	86318935	86319059	86337378	86337530	0,6	14,0	5,8	0,0	0.0109207	0.0,1.0	1.0,1.0	-0.5
ENSG00000173715.15	C11orf80	chr11	+	66822563	66822674	66821642	66821764	66828265	66828364	107104	0,0	42,71	9,8	2.74198e-06	1.0,1.0	0.7,0.816	0.242
ENSG00000173715.15	C11orf80	chr11	+	66801030	66801197	66800640	66800696	66803994	66804168	69116	2,0	27,29	3,3	0.0374706	0.945,1.0	0.818,0.829	0.149
ENSG00000173715.15	C11orf80	chr11	+	66801030	66801153	66800640	66800696	66803994	66804168	63113	2,0	28,28	3,3	0.0419939	0.94,1.0	0.824,0.824	0.146
ENSG00000173715.15	C11orf80	chr11	+	66801030	66801161	66800640	66800696	66803994	66804194	63116	2,0	29,28	3,3	0.0420952	0.94,1.0	0.829,0.824	0.143
ENSG00000173715.15	C11orf80	chr11	+	66788159	66788269	66759042	66759096	66796419	66796598	37,45	0,6	20,20	0,0	0.0443095	1.0,0.789	1.0,1.0	-0.105
ENSG00000133641.17	C12orf29	chr12	+	88040147	88040265	88035445	88035738	88042824	88042920	41,57	5,6	65,56	21,23	0.0171533	0.804,0.826	0.607,0.549	0.237
ENSG00000133943.20	C14orf159	chr14	+	91147780	91147858	91145220	91145313	91157638	91157690	20,49	0,0	30,40	5,2	0.00948111	1.0,1.0	0.75,0.909	0.17
ENSG00000133943.20	C14orf159	chr14	+	91145220	91145313	91114084	91114283	91157638	91157690	5,1	10,19	19,11	13,17	0.0409538	0.2,0.026	0.422,0.244	-0.22
ENSG00000185347.17	C14orf80	chr14	+	105493834	105493933	105492578	105492734	105497356	105497443	23,59	9,4	105,95	0,2	0.000982678	0.561,0.881	1.0,0.96	-0.259
ENSG00000128891.15	C15orf57	chr15	-	40553594	40554127	40531330	40532302	40557215	40557372	12,12	0,0	18,22	6,2	0.00278985	1.0,1.0	0.6,0.846	0.277
ENSG00000130731.15	C16orf13	chr16	-	634888	634956	634718	634797	635280	635340	195306	6,12	148147	14,17	0.0193851	0.943,0.929	0.844,0.815	0.107
ENSG00000130731.15	C16orf13	chr16	-	634888	635012	634718	634797	635280	635340	113158	6,12	83,91	14,17	0.0404599	0.904,0.868	0.748,0.728	0.148
ENSG00000130731.15	C16orf13	chr16	-	634888	634923	634718	634797	635280	635340	25,65	6,12	19,33	14,17	0.0410811	0.737,0.785	0.477,0.566	0.24
ENSG00000130731.15	C16orf13	chr16	-	634888	635059	634718	634797	635280	635340	109159	6,12	83,91	14,17	0.043675	0.901,0.869	0.748,0.728	0.147
ENSG00000130731.15	C16orf13	chr16	-	634888	635063	634718	634797	635280	635340	123169	6,12	89104	14,17	0.0478058	0.911,0.876	0.761,0.754	0.136
ENSG00000125319.14	C17orf53	chr17	+	44150960	44151044	44147857	44149027	44154555	44154664	6,6	0,0	13,21	4,1	0.0253494	1.0,1.0	0.619,0.913	0.234
ENSG00000178927.16	C17orf62	chr17	-	82447579	82447621	82446622	82446696	82449169	82449292	130114	11,10	75,79	20,14	0.0463398	0.882,0.878	0.703,0.781	0.138
ENSG00000000460.16	C1orf112	chr1	+	169807790	169807929	169806003	169806088	169821678	169821719	15,36	3,2	100,76	0,0	0.0431941	0.714,0.9	1.0,1.0	-0.193
ENSG00000198520.10	C1orf228	chr1	+	44689741	44689874	44674779	44674873	44700922	44701119	0,1	11,0	1,2	0,0	0.0015009	0.0,1.0	1.0,1.0	-0.5
ENSG00000162972.10	C2orf47	chr2	+	199961826	199961928	199959753	199959880	199963732	199964125	146163	8,4	186192	38,32	2.38209e-05	0.901,0.953	0.71,0.75	0.197
ENSG00000162972.10	C2orf47	chr2	+	199961780	199961928	199959753	199959880	199963732	199964125	190198	8,4	236257	38,32	3.41917e-05	0.922,0.961	0.756,0.801	0.163
ENSG00000162972.10	C2orf47	chr2	+	199961784	199961928	199959753	199959880	199963732	199964125	142156	8,4	188191	38,32	4.29118e-05	0.899,0.951	0.712,0.749	0.195
ENSG00000088543.14	C3orf18	chr3	-	50565465	50565861	50561721	50561747	50567462	50567665	11,10	8,2	13,15	1,0	0.00504897	0.407,0.714	0.867,1.0	-0.373
ENSG00000088543.14	C3orf18	chr3	-	50566005	50566094	50561721	50561747	50567462	50567751	7,0	8,2	1,4	1,0	0.0497447	0.304,0.0	0.333,1.0	-0.514
ENSG00000179021.9	C3orf38	chr3	+	88150941	88151072	88149742	88150185	88153229	88153346	10,7	22,44	0,2	30,43	0.0027447	0.185,0.074	0.0,0.023	0.118
ENSG00000179021.9	C3orf38	chr3	+	88150916	88151072	88149742	88150185	88153229	88153346	10,5	22,44	0,2	30,43	0.0071173	0.185,0.054	0.0,0.023	0.108
ENSG00000151881.14	C5orf28	chr5	-	43453657	43454043	43446341	43446557	43479889	43479987	47,51	0,0	31,46	2,7	0.00202566	1.0,1.0	0.886,0.767	0.173
ENSG00000172244.8	C5orf34	chr5	-	43509144	43509375	43508576	43508666	43514805	43515145	17,31	0,0	31,47	6,8	0.000566547	1.0,1.0	0.721,0.746	0.266
ENSG00000197603.13	C5orf42	chr5	-	37164272	37164327	37162464	37162566	37165538	37165671	56,42	2,6	16,33	0,0	0.020108	0.94,0.798	1.0,1.0	-0.131
ENSG00000186577.11	C6orf1	chr6	-	34247466	34247492	34247043	34247149	34247680	34247864	21,13	4,8	42,37	1,2	0.00980138	0.795,0.545	0.969,0.932	-0.28
ENSG00000241852.9	C8orf58	chr8	+	22602536	22602643	22602199	22602312	22603194	22604150	124138	15,23	6,15	4,13	0.00159801	0.805,0.75	0.429,0.366	0.38
ENSG00000241852.9	C8orf58	chr8	+	22602560	22602643	22602199	22602312	22603194	22604133	135116	15,23	5,15	4,13	0.00202566	0.818,0.716	0.385,0.366	0.391
ENSG00000176731.11	C8orf59	chr8	-	85214920	85215037	85214502	85214631	85217385	85217702	643903	59,91	797818	153191	1.67044e-05	0.845,0.832	0.723,0.682	0.136
ENSG00000253250.2	C8orf88	chr8	-	90978578	90978652	90971065	90971141	90980362	90980461	19,29	0,0	23,28	5,2	0.00603618	1.0,1.0	0.697,0.875	0.214
ENSG00000148120.14	C9orf3	chr9	+	95082574	95082719	95080693	95080780	95086681	95087218	845751	126120	389557	131136	0.00226193	0.77,0.758	0.598,0.672	0.129
ENSG00000148120.14	C9orf3	chr9	+	94923985	94924175	94800756	94801002	94955176	94955279	27,17	0,0	13,11	3,3	0.00315442	1.0,1.0	0.684,0.647	0.335
ENSG00000148120.14	C9orf3	chr9	+	95082574	95082691	95080693	95080780	95086681	95086841	597497	126120	283412	131136	0.0156427	0.703,0.674	0.519,0.602	0.128
ENSG00000084774.13	CAD	chr2	+	27240566	27240617	27240264	27240361	27240910	27240955	7,24	16,39	10,9	67,51	0.0119816	0.203,0.264	0.08,0.093	0.147
ENSG00000012822.15	CALCOCO1	chr12	-	53725689	53725759	53725086	53725266	53727403	53727606	2,11	20,16	0,0	3,7	0.0157146	0.048,0.257	0.0,0.0	0.152
ENSG00000143933.16	CALM2	chr2	-	47172413	47172459	47170733	47170764	47176276	47176470	11,14	0,0	10,5	2,3	0.00572801	1.0,1.0	0.753,0.504	0.371
ENSG00000148660.20	CAMK2G	chr10	-	73825278	73825347	73824039	73824084	73837467	73837511	46107	12,21	74,88	4,7	0.0216616	0.66,0.721	0.904,0.864	-0.194
ENSG00000004660.14	CAMKK1	chr17	-	3883883	3883937	3883428	3883480	3884379	3884427	21,35	7,0	31,35	0,0	0.0205302	0.631,1.0	1.0,1.0	-0.184
ENSG00000110931.18	CAMKK2	chr12	-	121268846	121268971	121268637	121268689	121269527	121269581	4,3	7,23	0,0	24,27	0.0306949	0.222,0.061	0.0,0.0	0.142
ENSG00000108509.20	CAMTA2	chr17	-	4982088	4982227	4981677	4981831	4982756	4982892	49,31	0,0	36,55	9,5	0.000384834	1.0,1.0	0.667,0.846	0.244
ENSG00000108509.20	CAMTA2	chr17	-	4982088	4982175	4981677	4981831	4982756	4982892	44,31	0,0	31,54	9,5	0.000392228	1.0,1.0	0.633,0.844	0.262
ENSG00000108509.20	CAMTA2	chr17	-	4982088	4982160	4981677	4981831	4982756	4982892	49,48	0,0	42,69	9,5	0.000496342	1.0,1.0	0.7,0.873	0.214
ENSG00000108509.20	CAMTA2	chr17	-	4985823	4985983	4982975	4983043	4986191	4986234	40,39	6,2	23,32	0,0	0.00908084	0.769,0.907	1.0,1.0	-0.162
ENSG00000108509.20	CAMTA2	chr17	-	4985879	4985983	4982975	4983043	4986191	4986234	50,48	6,2	34,49	0,0	0.0100828	0.806,0.923	1.0,1.0	-0.135
ENSG00000171302.16	CANT1	chr17	-	78998147	78998286	78997839	78997963	79000099	79000270	22,21	14,11	12,7	24,27	0.00225141	0.44,0.488	0.2,0.115	0.306
ENSG00000171302.16	CANT1	chr17	-	79000099	79000253	78997839	78997963	79009663	79009765	14,12	42,33	24,27	20,31	0.0193563	0.143,0.154	0.375,0.303	-0.19
ENSG00000182472.8	CAPN12	chr19	-	38733702	38733781	38731167	38731223	38735369	38735405	14,18	7,2	3,13	0,0	0.00168664	0.5,0.818	1.0,1.0	-0.341
ENSG00000110888.17	CAPRIN2	chr12	-	30733628	30733711	30731342	30731510	30734967	30735206	15,27	9,34	8,9	29,43	0.00699743	0.455,0.284	0.121,0.095	0.262
ENSG00000110888.17	CAPRIN2	chr12	-	30715874	30715954	30715112	30715144	30716507	30716676	0,0	12,6	3,5	10,8	0.0071173	0.0,0.0	0.13,0.238	-0.184
ENSG00000110888.17	CAPRIN2	chr12	-	30715874	30715954	30715112	30715141	30716507	30716676	0,0	9,16	2,6	10,12	0.00856254	0.0,0.0	0.091,0.2	-0.146
ENSG00000110888.17	CAPRIN2	chr12	-	30719078	30719209	30716622	30716676	30720810	30720915	45,41	0,1	21,38	3,5	0.010253	1.0,0.953	0.778,0.792	0.191
ENSG00000110888.17	CAPRIN2	chr12	-	30719078	30719258	30716622	30716676	30720810	30720915	45,41	0,1	21,38	3,5	0.010253	1.0,0.953	0.778,0.792	0.191
ENSG00000110888.17	CAPRIN2	chr12	-	30719078	30719221	30714958	30716676	30720810	30720915	45,41	0,1	20,40	3,5	0.010818	1.0,0.953	0.769,0.8	0.192
ENSG00000110888.17	CAPRIN2	chr12	-	30719078	30719225	30716507	30716676	30720810	30720915	52,58	0,1	32,60	3,5	0.0220714	1.0,0.967	0.842,0.857	0.134
ENSG00000105483.16	CARD8	chr19	-	48233828	48233980	48232452	48232493	48234402	48234464	12,15	22,23	8,12	65,51	0.0176228	0.214,0.246	0.058,0.105	0.148
ENSG00000138380.17	CARF	chr2	+	202974333	202974370	202971504	202971738	202977268	202977332	5,9	4,8	8,5	1,0	0.00336805	0.452,0.426	0.841,1.0	-0.481
ENSG00000138380.17	CARF	chr2	+	202974333	202974496	202971504	202971738	202977268	202977332	26,22	4,8	14,11	1,0	0.0157146	0.765,0.579	0.875,1.0	-0.266
ENSG00000110619.16	CARS	chr11	-	3047752	3048001	3042164	3042256	3057342	3057437	8,2	9,6	13,16	0,4	0.00803992	0.308,0.143	1.0,0.667	-0.608
ENSG00000137812.19	CASC5	chr15	+	40605109	40605149	40602914	40602966	40606392	40606452	29,22	7,0	33,37	0,0	0.014836	0.727,1.0	1.0,1.0	-0.137
ENSG00000147044.20	CASK	chrX	-	41557031	41557100	41555599	41555635	41559778	41559847	7,30	55100	42,49	62,75	0.00171272	0.061,0.132	0.256,0.249	-0.156
ENSG00000105971.14	CAV2	chr7	+	116500259	116500360	116499389	116499931	116505970	116506108	274257	5,11	67127	8,15	0.00593772	0.965,0.921	0.807,0.809	0.135
ENSG00000105971.14	CAV2	chr7	+	116500259	116500355	116499389	116499931	116505970	116506108	271257	5,11	67128	8,15	0.00649304	0.964,0.921	0.807,0.81	0.134
ENSG00000163006.11	CCDC138	chr2	+	108873450	108873589	108856793	108856970	108876087	108876578	11,11	0,0	24,18	2,4	0.00802154	1.0,1.0	0.857,0.692	0.226
ENSG00000144395.17	CCDC150	chr2	+	196677114	196677192	196676553	196676731	196677292	196677361	6,10	0,1	11,13	3,3	0.0465797	1.0,0.833	0.647,0.684	0.251
ENSG00000280670.2	CCDC163P	chr1	-	45495417	45495545	45493936	45495166	45496555	45496623	11,9	0,0	5,6	5,0	0.0495185	1.0,1.0	0.333,1.0	0.334
ENSG00000147419.16	CCDC25	chr8	-	27756718	27756770	27752511	27752587	27762418	27762458	109112	4,4	129159	13,25	0.00960092	0.94,0.942	0.852,0.786	0.122
ENSG00000176155.18	CCDC57	chr17	-	82179026	82179189	82178473	82178605	82183773	82183932	39,70	0,1	73,65	8,6	0.00318132	1.0,0.972	0.82,0.844	0.154
ENSG00000176155.18	CCDC57	chr17	-	82108767	82108954	82101751	82101866	82127691	82127818	4,12	4,12	2,4	18,28	0.00526937	0.333,0.333	0.053,0.067	0.273
ENSG00000180376.16	CCDC66	chr3	+	56560861	56561012	56559568	56559594	56563683	56564125	0,0	6,13	10,1	10,15	0.00998882	0.0,0.0	0.333,0.032	-0.182
ENSG00000180376.16	CCDC66	chr3	+	56560861	56560968	56559568	56559594	56563683	56564156	0,0	6,13	6,2	10,15	0.0166185	0.0,0.0	0.231,0.063	-0.147
ENSG00000180376.16	CCDC66	chr3	+	56571166	56571302	56566950	56567053	56592969	56593101	14,8	0,0	24,10	2,3	0.0220714	1.0,1.0	0.857,0.625	0.259
ENSG00000163040.14	CCDC74A	chr2	+	131532709	131532781	131531663	131531802	131532863	131532941	10,11	5,0	21,12	0,0	0.0408652	0.5,1.0	1.0,1.0	-0.25
ENSG00000163040.14	CCDC74A	chr2	+	131532588	131532781	131531663	131531802	131532863	131532937	6,9	5,0	29,31	0,0	0.0489594	0.375,1.0	1.0,1.0	-0.313
ENSG00000091986.15	CCDC80	chr3	-	112607175	112607256	112596793	112605763	112609977	112610081	149208	12,14	127152	2,0	0.000274378	0.861,0.881	0.969,1.0	-0.113
ENSG00000136280.15	CCM2	chr7	+	45068442	45068579	45064462	45064646	45072725	45073288	83,64	0,0	94,70	4,5	0.0161425	1.0,1.0	0.922,0.875	0.101
ENSG00000136280.15	CCM2	chr7	+	45064462	45064646	45038252	45038426	45068442	45068579	83,64	6,6	92,69	2,0	0.0172841	0.874,0.842	0.958,1.0	-0.121
ENSG00000166946.13	CCNDBP1	chr15	+	43194080	43194137	43192742	43192803	43194414	43194461	9,11	93103	27,22	33,56	4.25856e-05	0.051,0.056	0.313,0.179	-0.193
ENSG00000162063.12	CCNF	chr16	+	2446704	2446810	2445457	2445622	2448854	2448978	6,5	9,24	0,4	39,40	0.0285763	0.25,0.094	0.0,0.048	0.148
ENSG00000163660.11	CCNL1	chr3	-	157157006	157157083	157153035	157153156	157158865	157158975	55,98	32,30	37,51	36,52	0.0424181	0.462,0.62	0.339,0.329	0.207
ENSG00000221978.11	CCNL2	chr1	-	1392678	1392798	1390765	1390865	1393395	1393460	0,0	9,5	3,3	8,6	0.0321924	0.0,0.0	0.158,0.2	-0.179
ENSG00000103540.16	CCP110	chr16	+	19525718	19525861	19523810	19524088	19527866	19528022	3,3	6,6	22,11	1,2	0.000239468	0.2,0.2	0.917,0.733	-0.625
ENSG00000260916.5	CCPG1	chr15	-	55359538	55360944	55355238	55356409	55365187	55365309	96151	0,0	84134	23,17	1.80552e-09	1.0,1.0	0.646,0.798	0.278
ENSG00000107771.15	CCSER2	chr10	+	84477574	84477664	84425730	84425893	84513448	84518521	16,49	0,0	40,56	5,3	0.0116165	1.0,1.0	0.8,0.903	0.148
ENSG00000163468.14	CCT3	chr1	-	156334867	156334908	156333547	156333643	156335826	156335888	0,0	9,4	4,3	5,9	0.00652886	0.0,0.0	0.337,0.175	-0.256
ENSG00000026508.16	CD44	chr11	+	35196745	35196874	35189834	35190065	35198120	35198246	0,0	1,10	3,5	6,5	0.00411893	0.0,0.0	0.2,0.333	-0.267
ENSG00000196776.14	CD47	chr3	-	108049618	108049651	108047080	108047292	108050577	108050602	3,0	13,35	10,11	23,23	0.00519934	0.137,0.0	0.23,0.247	-0.17
ENSG00000196776.14	CD47	chr3	-	108051938	108051970	108043298	108047292	108057476	108057569	214235	18,41	122135	32,46	0.00847085	0.892,0.799	0.725,0.67	0.148
ENSG00000085063.14	CD59	chr11	-	33731423	33731468	33722378	33722463	33733494	33733610	29,52	0,1	10,9	5,2	0.00113539	1.0,0.97	0.551,0.734	0.342
ENSG00000085063.14	CD59	chr11	-	33733494	33733610	33722378	33722463	33736381	33736425	0,1	9,3	5,2	0,7	0.0373201	0.0,0.143	1.0,0.125	-0.491
ENSG00000081377.16	CDC14B	chr9	-	96515648	96515792	96509672	96509789	96522505	96522622	26,26	9,9	15,15	16,24	0.00960092	0.591,0.591	0.319,0.238	0.313
ENSG00000081377.16	CDC14B	chr9	-	96551795	96551872	96534454	96534542	96562692	96562785	6,31	0,0	31,22	3,3	0.0256581	1.0,1.0	0.838,0.786	0.188
ENSG00000158402.18	CDC25C	chr5	-	138319218	138319374	138291969	138292116	138328483	138328529	42,35	0,0	65,76	5,3	0.0350762	1.0,1.0	0.867,0.927	0.103
ENSG00000070831.15	CDC42	chr1	+	22074093	22074219	22052667	22052742	22078428	22078583	23,37	8,5	9,33	11,24	0.0407278	0.59,0.787	0.29,0.407	0.34
ENSG00000070831.15	CDC42	chr1	+	22078746	22078881	22078428	22078583	22081721	22081794	0,0	16,13	3,3	11,10	0.0421329	0.0,0.0	0.12,0.13	-0.125
ENSG00000093009.9	CDC45	chr22	+	19482790	19482827	19480952	19481045	19483861	19484005	4,15	0,0	22,32	1,6	0.0208132	1.0,1.0	0.936,0.779	0.142
ENSG00000111665.11	CDCA3	chr12	-	6849322	6849413	6849153	6849198	6849564	6849858	79,71	1,1	88,91	4,23	0.002143	0.975,0.973	0.917,0.664	0.183
ENSG00000111665.11	CDCA3	chr12	-	6849322	6849429	6848808	6849198	6849564	6849858	98143	1,1	199168	4,23	0.002143	0.98,0.986	0.961,0.785	0.11
ENSG00000111665.11	CDCA3	chr12	-	6849322	6849358	6848828	6849198	6849564	6849664	48,37	1,1	51,44	4,23	0.00543147	0.97,0.961	0.895,0.561	0.238
ENSG00000144354.13	CDCA7	chr2	+	173363999	173364161	173363817	173363895	173364794	173364873	10,7	3,15	4,14	79,78	0.0193851	0.625,0.189	0.025,0.082	0.354
ENSG00000185324.21	CDK10	chr16	+	89689251	89689324	89687588	89687815	89690552	89690624	39,58	0,2	31,50	4,7	0.0195019	1.0,0.935	0.795,0.781	0.179
ENSG00000149187.17	CELF1	chr11	-	47500860	47500932	47488836	47489024	47506857	47506897	7,8	3,3	13,14	0,0	0.00127475	0.538,0.571	1.0,1.0	-0.446
ENSG00000138778.11	CENPE	chr4	-	103163478	103163553	103163136	103163256	103174735	103174903	0,6	10,17	38,36	23,31	0.00187224	0.0,0.15	0.452,0.367	-0.334
ENSG00000120334.15	CENPL	chr1	-	173806438	173806576	173802962	173803505	173807266	173807518	0,1	26,28	18,8	49,44	0.000672296	0.0,0.018	0.155,0.083	-0.11
ENSG00000138092.10	CENPO	chr2	+	24793851	24793965	24793444	24793501	24799674	24799844	14,20	0,5	36,30	0,0	0.0443656	1.0,0.667	1.0,1.0	-0.166
ENSG00000100629.16	CEP128	chr14	-	80840681	80840768	80792759	80793110	80862756	80862873	5,14	0,0	15,28	4,1	0.0386523	1.0,1.0	0.652,0.933	0.208
ENSG00000100629.16	CEP128	chr14	-	80831142	80831294	80792759	80793110	80862756	80862873	16,23	0,0	25,22	4,1	0.0459285	1.0,1.0	0.758,0.917	0.162
ENSG00000101639.18	CEP192	chr18	+	13103874	13103967	13103508	13103588	13104983	13105079	7,3	17,26	0,0	34,38	0.00417081	0.171,0.055	0.0,0.0	0.113
ENSG00000166004.14	CEP295	chr11	+	93696319	93696417	93695496	93695673	93696681	93696975	33,22	0,0	45,64	1,6	0.0283617	1.0,1.0	0.957,0.842	0.101
ENSG00000164118.12	CEP44	chr4	+	174297936	174298062	174283904	174284061	174299071	174299210	29,45	3,3	35,36	0,0	0.0347336	0.829,0.882	1.0,1.0	-0.145
ENSG00000164118.12	CEP44	chr4	+	174297965	174298062	174283904	174284061	174299071	174299210	29,50	3,3	35,36	0,0	0.0401512	0.829,0.893	1.0,1.0	-0.139
ENSG00000166037.10	CEP57	chr11	+	95822498	95822576	95821876	95821978	95827785	95828027	69108	9,3	79,98	1,0	0.0071173	0.793,0.947	0.975,1.0	-0.118
ENSG00000183137.14	CEP57L1	chr6	+	109155790	109155877	109155229	109155307	109159024	109159102	17,24	9,6	51,44	1,3	0.00335223	0.486,0.667	0.962,0.88	-0.345
ENSG00000182923.16	CEP63	chr3	+	134495295	134495360	134485790	134486052	134507108	134507286	9,8	4,3	19,11	0,1	0.00551984	0.54,0.582	1.0,0.852	-0.365
ENSG00000182923.16	CEP63	chr3	+	134495295	134495364	134485790	134486052	134507108	134507253	35,32	4,3	37,38	0,1	0.0343423	0.816,0.844	1.0,0.951	-0.146
ENSG00000182504.10	CEP97	chr3	+	101728813	101728937	101727382	101727541	101731839	101731953	36,32	0,0	36,55	5,2	0.0172841	1.0,1.0	0.783,0.932	0.142
ENSG00000206530.8	CFAP44	chr3	-	113333405	113333583	113330167	113330668	113341743	113341917	12,15	7,1	9,14	0,1	0.0364131	0.462,0.882	1.0,0.875	-0.265
ENSG00000206530.8	CFAP44	chr3	-	113338538	113338736	113333450	113333583	113341743	113341918	2,4	10,8	0,0	6,7	0.0445228	0.091,0.2	0.0,0.0	0.146
ENSG00000170004.16	CHD3	chr17	+	7910427	7910591	7909142	7909338	7910846	7910973	256269	21,10	207251	36,25	0.0333146	0.859,0.931	0.742,0.834	0.107
ENSG00000204116.11	CHIC1	chrX	+	73577406	73577461	73563199	73563580	73584416	73584572	43,60	3,4	24,54	0,0	0.0399335	0.89,0.894	1.0,1.0	-0.108
ENSG00000110721.11	CHKA	chr11	-	68074716	68074830	68070723	68070857	68081403	68081810	44,76	7,0	74107	0,0	0.0295383	0.759,1.0	1.0,1.0	-0.121
ENSG00000128656.13	CHN1	chr2	-	174940815	174940894	174918533	174918565	174944887	174944943	9,7	14,25	3,3	29,43	0.0287787	0.243,0.123	0.049,0.034	0.141
ENSG00000127586.16	CHTF18	chr16	+	795131	795356	794053	794201	795684	795834	7,24	0,0	38,40	6,1	0.0227516	1.0,1.0	0.76,0.952	0.144
ENSG00000160679.12	CHTOP	chr1	+	153643226	153643364	153642245	153642429	153645063	153645470	112117	16,14	150180	2,12	0.0222659	0.778,0.807	0.974,0.882	-0.135
ENSG00000148337.20	CIZ1	chr9	-	128190328	128190398	128185546	128185776	128190687	128190862	29,12	0,0	0,25	4,8	4.25856e-05	1.0,1.0	0.0,0.611	0.695
ENSG00000148337.20	CIZ1	chr9	-	128190328	128190428	128185546	128185776	128190687	128190862	24,12	0,0	3,24	4,8	6.8053e-05	1.0,1.0	0.273,0.6	0.564
ENSG00000148337.20	CIZ1	chr9	-	128187862	128187934	128185546	128185776	128190687	128190862	18,37	0,0	30,52	4,8	0.00117127	1.0,1.0	0.789,0.765	0.223
ENSG00000148337.20	CIZ1	chr9	-	128190328	128190444	128185546	128185776	128190687	128190862	38,46	0,0	37,69	4,8	0.0012032	1.0,1.0	0.822,0.812	0.183
ENSG00000148337.20	CIZ1	chr9	-	128185546	128185776	128180720	128180799	128190328	128190444	31,12	0,8	6,35	0,0	0.0298487	1.0,0.429	1.0,1.0	-0.285
ENSG00000128973.11	CLN6	chr15	-	68211674	68211863	68211262	68211318	68214289	68214388	80138	2,3	77129	13,6	0.043371	0.952,0.958	0.748,0.915	0.123
ENSG00000128973.11	CLN6	chr15	-	68211648	68211863	68211262	68211318	68214289	68214388	73,82	2,3	49,86	13,6	0.0449611	0.948,0.932	0.653,0.878	0.174
ENSG00000153721.17	CNKSR3	chr6	-	154433465	154433507	154430471	154430591	154441291	154441379	79,81	1,0	28,43	2,4	0.0449611	0.98,1.0	0.898,0.871	0.105
ENSG00000064666.14	CNN2	chr19	+	1036129	1036246	1032558	1032696	1036415	1036562	277339	54,57	285366	18,34	0.00264241	0.719,0.748	0.888,0.843	-0.132
ENSG00000106603.17	COA1	chr7	-	43650611	43650712	43648599	43648652	43665657	43665722	4,7	8,4	20,15	1,1	0.00111791	0.2,0.467	0.909,0.882	-0.562
ENSG00000106078.17	COBL	chr7	-	51026545	51026665	51025108	51025372	51027711	51029591	23,38	6,0	35,50	0,0	0.0325532	0.657,1.0	1.0,1.0	-0.171
ENSG00000169031.18	COL4A3	chr2	+	227308898	227309076	227307715	227307919	227309203	227309318	26,19	3,3	3,3	0,0	0.0282968	0.813,0.76	1.0,1.0	-0.214
ENSG00000165644.10	COMTD1	chr10	-	75235615	75235739	75235314	75235372	75235834	75236011	25,63	6,5	23,53	0,1	0.00795635	0.676,0.863	1.0,0.964	-0.212
ENSG00000165644.10	COMTD1	chr10	-	75235619	75235743	75235266	75235372	75235834	75235925	43,54	6,5	27,43	0,1	0.0107528	0.782,0.844	1.0,0.956	-0.165
ENSG00000165644.10	COMTD1	chr10	-	75235615	75235743	75235266	75235372	75235834	75236011	68117	6,5	50,95	0,1	0.0166936	0.85,0.921	1.0,0.979	-0.104
ENSG00000005243.9	COPZ2	chr17	-	48028471	48028510	48026166	48026475	48029124	48029176	65,56	11,5	19,34	0,1	0.0113081	0.793,0.879	1.0,0.957	-0.142
ENSG00000047457.13	CP	chr3	-	149176249	149176407	149173483	149173730	149177839	149177907	4171018	7,35	117270	12,20	0.00774313	0.968,0.936	0.83,0.871	0.101
ENSG00000047457.13	CP	chr3	-	149176249	149176351	149172498	149173730	149177839	149177979	4171029	7,35	118276	12,20	0.0084767	0.968,0.936	0.831,0.873	0.1
ENSG00000047457.13	CP	chr3	-	149176237	149176412	149173466	149173730	149177839	149177979	344829	7,35	94297	12,20	0.0491633	0.961,0.922	0.797,0.881	0.103
ENSG00000137449.15	CPEB2	chr4	+	15008337	15008427	15007304	15007586	15017187	15017278	24,14	37,38	2,7	28,36	0.0179586	0.245,0.156	0.034,0.089	0.139
ENSG00000113742.12	CPEB4	chr5	+	173943025	173943049	173932449	173932500	173944966	173945140	0,0	17,19	4,2	7,10	0.0107816	0.0,0.0	0.301,0.131	-0.216
ENSG00000113851.13	CRBN	chr3	-	3172505	3172646	3167633	3167793	3172775	3172925	18,19	59,59	35,45	34,55	0.00267246	0.132,0.139	0.34,0.29	-0.179
ENSG00000009307.15	CSDE1	chr1	-	114756776	114756888	114749820	114750207	114757924	114757987	0,0	1,12	3,3	7,10	0.0463699	0.0,0.0	0.176,0.13	-0.153
ENSG00000169826.7	CSGALNACT2	chr10	+	43167003	43167098	43163865	43164044	43175950	43176032	20,33	0,0	32,14	2,3	0.0406942	1.0,1.0	0.889,0.7	0.206
ENSG00000141551.14	CSNK1D	chr17	-	82245975	82246039	82244679	82244831	82248874	82249014	42116	0,2	94,74	9,5	0.0116834	1.0,0.968	0.846,0.886	0.118
ENSG00000104218.14	CSPP1	chr8	+	67086822	67086846	67086006	67086110	67091802	67091883	0,0	17,11	6,4	14,14	0.00174619	0.0,0.0	0.244,0.177	-0.21
ENSG00000104218.14	CSPP1	chr8	+	67091802	67091883	67086006	67086110	67095292	67095732	17,11	4,1	14,15	0,0	0.0163038	0.68,0.846	1.0,1.0	-0.237
ENSG00000149474.13	CSRP2BP	chr20	+	18159083	18159265	18150820	18150942	18161822	18162239	57,62	8,0	55,60	0,0	0.0195585	0.781,1.0	1.0,1.0	-0.109
ENSG00000175029.16	CTBP2	chr10	-	125122656	125122868	125038996	125039155	125133511	125133612	4,2	7,3	3,1	0,0	8.23903e-05	0.222,0.25	1.0,1.0	-0.764
ENSG00000178971.13	CTC1	chr17	-	8229141	8229206	8228502	8228629	8229301	8229446	39,30	0,1	24,22	7,5	0.000408156	1.0,0.94	0.642,0.697	0.3
ENSG00000178971.13	CTC1	chr17	-	8228726	8228892	8228502	8228629	8229301	8229446	32,16	0,1	10,23	7,5	0.00105224	1.0,0.889	0.417,0.697	0.388
ENSG00000250222.1	CTC-338M12.5	chr5	+	181193341	181193467	181192069	181192140	181194233	181194428	4,5	0,0	16,10	4,1	0.0144214	1.0,1.0	0.667,0.833	0.25
ENSG00000085733.15	CTTN	chr11	+	70421469	70421580	70420400	70420510	70422939	70422995	644880	159134	765923	54103	0.000807784	0.669,0.767	0.876,0.818	-0.129
ENSG00000044090.8	CUL7	chr6	-	43047946	43047989	43046879	43047107	43048147	43048160	2,1	27,22	4,6	9,8	0.0118301	0.044,0.028	0.217,0.319	-0.232
ENSG00000173681.16	CXorf23	chrX	-	19954139	19954210	19953777	19953892	19955390	19955566	13,5	10,22	4,0	27,29	0.0134631	0.394,0.102	0.069,0.0	0.213
ENSG00000197021.8	CXorf40B	chrX	-	149934376	149934568	149934004	149934137	149937432	149937480	0,2	19,24	7,7	23,28	0.0225978	0.0,0.04	0.132,0.111	-0.101
ENSG00000114395.10	CYB561D2	chr3	+	50352008	50352046	50350857	50351560	50353240	50354032	62,95	3,1	53,81	6,10	0.0281742	0.931,0.984	0.852,0.841	0.111
ENSG00000055163.18	CYFIP2	chr5	+	157269427	157269583	157266078	157266195	157285338	157285478	5,6	4,9	0,2	9,13	0.0136478	0.385,0.25	0.0,0.071	0.282
ENSG00000178149.16	DALRD3	chr3	-	49016611	49016673	49016428	49016511	49016773	49016847	123185	0,0	92,84	6,5	0.00149013	1.0,1.0	0.891,0.9	0.105
ENSG00000143164.15	DCAF6	chr1	+	168015780	168015951	168004532	168004793	168022987	168023047	37,40	47,41	10,17	29,53	0.0145836	0.282,0.328	0.147,0.138	0.162
ENSG00000057019.15	DCBLD2	chr3	-	98867290	98867438	98849460	98849598	98901121	98901326	9,2	11,28	1,0	27,26	0.010441	0.29,0.034	0.018,0.0	0.153
ENSG00000152457.17	DCLRE1C	chr10	-	14926842	14926897	14922980	14923069	14928015	14928152	15,22	0,0	23,20	5,2	0.00560551	1.0,1.0	0.722,0.85	0.214
ENSG00000150401.14	DCUN1D2	chr13	-	113462739	113462891	113461053	113461136	113474123	113474254	8,4	3,1	13,12	1,0	0.0440692	0.571,0.667	0.867,1.0	-0.315
ENSG00000130311.10	DDA1	chr19	+	17312070	17312318	17309530	17309657	17314022	17314103	10,7	15,24	0,2	11,15	0.026487	0.25,0.127	0.0,0.063	0.157
ENSG00000157349.16	DDX19B	chr16	+	70313967	70314085	70299052	70299354	70314901	70314955	0,0	10,6	1,5	9,2	0.0376704	0.0,0.0	0.053,0.556	-0.305
ENSG00000125485.17	DDX31	chr9	-	132618329	132618441	132612086	132612255	132630263	132630378	24,39	0,1	37,53	3,5	0.0466427	1.0,0.951	0.86,0.841	0.125
ENSG00000111364.15	DDX55	chr12	+	123618668	123618837	123616510	123616603	123619447	123619716	8,3	0,0	19,21	8,3	0.00212343	1.0,1.0	0.543,0.778	0.339
ENSG00000111364.15	DDX55	chr12	+	123605930	123606159	123602098	123602256	123607599	123607662	7,9	0,0	19,16	3,4	0.0051153	1.0,1.0	0.76,0.667	0.286
ENSG00000111364.15	DDX55	chr12	+	123605930	123605981	123602129	123602256	123607599	123607662	4,5	0,0	18,16	3,4	0.00774762	1.0,1.0	0.778,0.7	0.261
ENSG00000119522.15	DENND1A	chr9	-	123450692	123450749	123440359	123440491	123452275	123452347	33,64	5,4	55,80	0,0	0.00301204	0.786,0.899	1.0,1.0	-0.157
ENSG00000065357.19	DGKA	chr12	+	55938637	55938698	55937977	55938052	55938914	55938989	18,14	0,6	11,14	0,0	0.0290088	1.0,0.557	1.0,1.0	-0.222
ENSG00000278535.4	DHRS11	chr17	+	36598162	36598257	36594586	36595180	36598920	36599050	3,33	9,0	34,32	0,0	0.0499059	0.143,1.0	1.0,1.0	-0.428
ENSG00000157326.18	DHRS4	chr14	+	23959901	23960003	23955034	23955212	23967210	23968123	77,48	0,0	57,62	3,7	0.00276814	1.0,1.0	0.905,0.816	0.139
ENSG00000160305.17	DIP2A	chr21	+	46534584	46534687	46534003	46534113	46537223	46537288	38,42	6,0	26,32	0,0	0.0423228	0.76,1.0	1.0,1.0	-0.12
ENSG00000066084.12	DIP2B	chr12	+	50671185	50671398	50660193	50660319	50674473	50674629	147134	3,4	121136	9,17	0.011426	0.961,0.944	0.871,0.8	0.117
ENSG00000083520.14	DIS3	chr13	-	72781288	72781356	72778186	72778380	72781604	72781925	29,46	0,0	27,21	5,7	6.07664e-05	1.0,1.0	0.734,0.605	0.331
ENSG00000083520.14	DIS3	chr13	-	72780845	72781003	72778186	72778380	72781288	72781356	32,77	22,28	101114	18,13	0.00777077	0.421,0.579	0.737,0.814	-0.275
ENSG00000231607.8	DLEU2	chr13	-	50075558	50075653	50068096	50068163	50081822	50081978	24,30	0,2	37,50	7,7	0.0467262	1.0,0.882	0.725,0.781	0.188
ENSG00000161249.20	DMKN	chr19	-	35509910	35509961	35505717	35505765	35510183	35510252	36,70	0,0	30,42	5,9	3.19158e-05	1.0,1.0	0.778,0.731	0.246
ENSG00000161249.20	DMKN	chr19	-	35505938	35506049	35505717	35505765	35510183	35510252	55,86	0,0	75,93	5,9	0.000798574	1.0,1.0	0.882,0.838	0.14
ENSG00000161249.20	DMKN	chr19	-	35502135	35502183	35500532	35500580	35505717	35505765	22,29	0,0	16,48	3,3	0.0330187	1.0,1.0	0.761,0.905	0.167
ENSG00000161249.20	DMKN	chr19	-	35497646	35497681	35497219	35497538	35498715	35498763	16,38	18,43	10,7	31,23	0.0356686	0.374,0.373	0.178,0.17	0.2
ENSG00000104936.17	DMPK	chr19	-	45770970	45771157	45769724	45770640	45771349	45771396	52,53	0,7	32,50	0,0	0.0294091	1.0,0.791	1.0,1.0	-0.105
ENSG00000105877.17	DNAH11	chr7	+	21635870	21636095	21619955	21620078	21637610	21637702	12,8	5,0	2,3	0,0	0.0356356	0.545,1.0	1.0,1.0	-0.228
ENSG00000185842.14	DNAH14	chr1	+	225231072	225231151	225185290	225185425	225240592	225240822	5,2	7,4	5,4	0,0	2.17102e-05	0.263,0.2	1.0,1.0	-0.768
ENSG00000185842.14	DNAH14	chr1	+	224960130	224960302	224954958	224955098	224964478	224964609	138120	2,0	117134	8,13	0.000326065	0.972,1.0	0.88,0.838	0.127
ENSG00000185842.14	DNAH14	chr1	+	224960197	224960302	224954958	224955098	224964478	224964609	137120	2,0	117135	8,13	0.000346715	0.972,1.0	0.88,0.839	0.127
ENSG00000158486.13	DNAH3	chr16	-	21036200	21036248	21033973	21034085	21036713	21036848	10,4	0,16	0,1	5,8	0.00919488	1.0,0.13	0.0,0.07	0.53
ENSG00000138246.15	DNAJC13	chr3	+	132516421	132516496	132514570	132514670	132516703	132516816	42,58	9,18	111105	8,8	0.00955125	0.7,0.617	0.874,0.868	-0.213
ENSG00000110011.13	DNAJC4	chr11	+	64232439	64232614	64230566	64230940	64233893	64233980	7,1	6,5	0,0	3,1	0.0113062	0.368,0.091	0.0,0.0	0.229
ENSG00000110011.13	DNAJC4	chr11	+	64231870	64231964	64230566	64230940	64233893	64234184	17,20	6,5	33,44	3,1	0.0345525	0.586,0.667	0.846,0.957	-0.275
ENSG00000088387.17	DOCK9	chr13	-	98825871	98825940	98824397	98824504	98826829	98826887	0,17	26,69	12,22	25,41	0.0386013	0.0,0.111	0.196,0.214	-0.15
ENSG00000148399.11	DPH7	chr9	-	137576308	137576402	137575708	137576167	137577469	137577603	17,21	1,0	17,25	12,21	2.13965e-06	0.895,1.0	0.415,0.373	0.553
ENSG00000074603.18	DPP8	chr15	-	65454262	65454415	65451959	65452102	65463760	65463906	16,52	0,0	31,47	4,2	0.0345575	1.0,1.0	0.795,0.922	0.141
ENSG00000229358.3	DPY19L1P1	chr7	-	32717100	32717192	32716717	32716809	32719135	32719193	0,0	19,3	4,2	3,3	0.00368878	0.0,0.0	0.4,0.25	-0.325
ENSG00000156162.16	DPY19L4	chr8	+	94726330	94726441	94719874	94720014	94738368	94738459	73,43	12,0	43,62	0,1	0.0181189	0.753,1.0	1.0,0.969	-0.108
ENSG00000157538.13	DSCR3	chr21	-	37261711	37261937	37240495	37240639	37267237	37267340	0,2	36,18	7,7	20,24	0.00624819	0.0,0.053	0.149,0.127	-0.112
ENSG00000111817.16	DSE	chr6	+	116433342	116433550	116430953	116431193	116435586	116444860	125,87	0,0	60,78	6,5	0.000976663	1.0,1.0	0.833,0.886	0.141
ENSG00000133059.16	DSTYK	chr1	-	205187417	205187806	205169162	205169832	205211270	205211566	35,42	0,6	44,38	0,0	0.0391112	1.0,0.778	1.0,1.0	-0.111
ENSG00000169718.17	DUS1L	chr17	-	82063467	82063518	82062860	82062973	82064125	82064255	105124	8,14	148197	3,2	0.000978094	0.884,0.838	0.966,0.983	-0.113
ENSG00000111266.8	DUSP16	chr12	-	12554535	12554659	12521080	12521463	12560999	12561077	9,24	0,0	25,40	5,3	0.00797325	1.0,1.0	0.714,0.87	0.208
ENSG00000204348.9	DXO	chr6	-	31971633	31971681	31970911	31971147	31971928	31972162	12,3	0,0	4,20	4,1	0.0243581	1.0,1.0	0.374,0.923	0.351
ENSG00000187240.13	DYNC2H1	chr11	+	103115176	103115338	103114102	103114238	103116569	103116714	28,22	0,0	16,23	2,3	0.0284066	1.0,1.0	0.8,0.793	0.204
ENSG00000187240.13	DYNC2H1	chr11	+	103128909	103129005	103125099	103125295	103133554	103133707	35,60	3,5	43,49	1,0	0.0321067	0.854,0.857	0.956,1.0	-0.123
ENSG00000093144.18	ECHDC1	chr6	-	127316449	127316502	127314815	127314896	127327001	127327144	117138	5,9	183134	27,29	0.00402291	0.931,0.898	0.795,0.726	0.154
ENSG00000198721.12	ECI2	chr6	-	4119185	4119305	4117307	4117451	4125249	4125370	165149	4,0	163169	18,14	0.000150563	0.954,1.0	0.819,0.858	0.138
ENSG00000131080.14	EDA2R	chrX	-	66604420	66604506	66602723	66602797	66615933	66616030	22,29	0,0	28,21	3,5	0.00234747	1.0,1.0	0.824,0.677	0.25
ENSG00000131080.14	EDA2R	chrX	-	66605047	66605226	66602723	66602797	66615933	66616030	22,46	0,0	55,41	3,5	0.0109663	1.0,1.0	0.902,0.804	0.147
ENSG00000179151.11	EDC3	chr15	-	74687090	74687179	74674960	74675142	74695879	74696000	0,2	6,12	7,8	4,6	0.00171272	0.0,0.077	0.467,0.4	-0.395
ENSG00000104529.17	EEF1D	chr8	-	143592646	143592893	143590017	143590081	143597347	143597413	8,22	0,0	5,8	1,3	0.0230877	1.0,1.0	0.714,0.571	0.358
ENSG00000104529.17	EEF1D	chr8	-	143592646	143592942	143589829	143590081	143597347	143597415	8,18	0,0	5,8	1,3	0.0234332	1.0,1.0	0.714,0.571	0.358
ENSG00000104529.17	EEF1D	chr8	-	143590607	143590735	143589694	143590081	143597347	143597415	12,13	0,0	6,7	1,3	0.0261369	1.0,1.0	0.75,0.538	0.356
ENSG00000104529.17	EEF1D	chr8	-	143590607	143590729	143589510	143590081	143597347	143597415	12,13	0,0	6,7	1,3	0.0261369	1.0,1.0	0.75,0.538	0.356
ENSG00000104529.17	EEF1D	chr8	-	143590607	143590738	143588990	143590081	143597347	143597415	12,13	0,0	7,7	1,3	0.0311045	1.0,1.0	0.778,0.538	0.342
ENSG00000118894.14	EEF2KMT	chr16	-	5097279	5097353	5095451	5095514	5097643	5097766	0,0	9,4	12,12	8,13	8.53703e-05	0.0,0.0	0.429,0.316	-0.372
ENSG00000118894.14	EEF2KMT	chr16	-	5093483	5093721	5091793	5091895	5095451	5095514	10,36	5,4	39,44	1,0	0.00292541	0.5,0.818	0.951,1.0	-0.317
ENSG00000118894.14	EEF2KMT	chr16	-	5093483	5093564	5091793	5091895	5095451	5095514	19,58	5,4	66,73	1,0	0.00413092	0.655,0.879	0.971,1.0	-0.219
ENSG00000118894.14	EEF2KMT	chr16	-	5091793	5091895	5090431	5090565	5095451	5095514	17,13	0,0	25,18	5,1	0.00826035	1.0,1.0	0.714,0.9	0.193
ENSG00000118894.14	EEF2KMT	chr16	-	5093483	5093721	5090431	5090565	5095451	5095514	9,11	0,0	29,28	5,1	0.0163716	1.0,1.0	0.744,0.933	0.161
ENSG00000178852.15	EFCAB13	chr17	+	47361377	47361464	47345015	47345098	47370436	47370508	0,1	11,8	4,5	7,5	0.00579611	0.0,0.059	0.222,0.333	-0.248
ENSG00000178852.15	EFCAB13	chr17	+	47361377	47361521	47345015	47345098	47370436	47370508	0,1	11,8	3,5	7,5	0.0115233	0.0,0.059	0.176,0.333	-0.225
ENSG00000163576.17	EFHB	chr3	-	19888443	19888651	19884402	19884615	19896686	19896841	9,12	4,1	10,15	0,0	0.0100067	0.529,0.857	1.0,1.0	-0.307
ENSG00000143590.13	EFNA3	chr1	+	155086127	155086205	155085876	155085942	155086412	155087538	30,37	20,8	12,23	0,0	6.3046e-05	0.429,0.698	1.0,1.0	-0.436
ENSG00000115504.14	EHBP1	chr2	+	62987930	62988038	62979190	62979335	62990715	62990840	128192	32,66	209267	34,41	0.0316058	0.667,0.593	0.755,0.765	-0.13
ENSG00000173442.12	EHBP1L1	chr11	+	65583591	65583765	65581898	65581965	65584240	65584398	27,27	5,2	9,12	0,0	0.0115367	0.73,0.871	1.0,1.0	-0.2
ENSG00000128829.11	EIF2AK4	chr15	+	40016501	40016672	40011280	40011346	40017107	40017242	50,81	0,0	90132	6,9	0.00212343	1.0,1.0	0.882,0.88	0.119
ENSG00000135930.13	EIF4E2	chr2	+	232557883	232558018	232556415	232556530	232564246	232564351	192323	4,6	189253	14,33	4.29008e-05	0.96,0.964	0.871,0.793	0.13
ENSG00000184708.17	EIF4ENIF1	chr22	-	31444605	31444690	31442961	31443094	31447425	31447565	25,27	6,0	19,35	0,0	0.0268357	0.676,1.0	1.0,1.0	-0.162
ENSG00000114867.19	EIF4G1	chr3	+	184315488	184315545	184314566	184314674	184317716	184317816	32,46	6,0	49,54	0,0	0.0477776	0.748,1.0	1.0,1.0	-0.126
ENSG00000115459.17	ELMOD3	chr2	+	85355554	85355598	85355075	85355170	85356966	85357252	13,13	0,1	9,15	2,4	0.0325532	1.0,0.89	0.736,0.699	0.228
ENSG00000163832.15	ELP6	chr3	-	47505915	47506022	47504329	47504448	47511147	47511226	0,0	8,2	4,2	6,6	0.0220429	0.0,0.0	0.25,0.143	-0.197
ENSG00000143924.18	EML4	chr2	+	42317480	42317524	42315961	42316050	42325466	42325554	48,62	9,2	102165	0,0	0.000523034	0.768,0.951	1.0,1.0	-0.141
ENSG00000154380.17	ENAH	chr1	-	225517195	225517990	225514595	225514900	225519197	225519565	110192	18,3	139152	2,2	0.0256581	0.753,0.97	0.972,0.974	-0.112
ENSG00000171617.13	ENC1	chr5	-	74637564	74637701	74634683	74636498	74640306	74641424	5,19	46,51	39,29	28,40	0.00188001	0.052,0.157	0.411,0.266	-0.234
ENSG00000173818.16	ENDOV	chr17	+	80422205	80422245	80415486	80415610	80423519	80423632	9,30	0,0	10,14	3,2	0.0199466	1.0,1.0	0.682,0.818	0.25
ENSG00000167280.16	ENGASE	chr17	+	79079465	79079637	79077662	79077864	79080206	79080364	18,39	0,1	20,25	5,3	0.00923284	1.0,0.951	0.667,0.806	0.239
ENSG00000167280.16	ENGASE	chr17	+	79079488	79079637	79077666	79077864	79080206	79080364	34,81	0,1	40,60	5,3	0.0211907	1.0,0.976	0.8,0.909	0.133
ENSG00000132199.18	ENOSF1	chr18	-	691067	691095	690566	690631	691203	691276	11,35	0,0	10,14	5,1	0.00618878	1.0,1.0	0.591,0.91	0.25
ENSG00000132199.18	ENOSF1	chr18	-	691067	691134	690566	690631	691203	691276	30,47	0,0	18,31	5,1	0.0120898	1.0,1.0	0.649,0.941	0.205
ENSG00000165675.16	ENOX2	chrX	-	130709242	130709331	130703119	130703254	130783546	130783690	2,0	12,16	8,6	10,23	0.0264664	0.077,0.0	0.286,0.115	-0.162
ENSG00000197586.12	ENTPD6	chr20	+	25221231	25221333	25218549	25218614	25222837	25222978	137161	36,35	204209	5,26	0.00191013	0.656,0.697	0.953,0.801	-0.201
ENSG00000088367.20	EPB41L1	chr20	+	36218875	36218962	36214359	36214440	36221863	36221944	90,66	28,26	132122	7,20	0.00507619	0.616,0.559	0.904,0.753	-0.241
ENSG00000088367.20	EPB41L1	chr20	+	36219760	36219844	36214372	36214440	36221863	36221944	152249	28,26	226327	7,20	0.00581197	0.731,0.827	0.942,0.891	-0.138
ENSG00000088367.20	EPB41L1	chr20	+	36214356	36214440	36212271	36212376	36218875	36218962	82,69	96,84	133122	75,84	0.0120898	0.299,0.291	0.47,0.421	-0.151
ENSG00000088367.20	EPB41L1	chr20	+	36214359	36214440	36212271	36212376	36218875	36218962	98,69	96,84	142134	75,84	0.013877	0.338,0.291	0.486,0.444	-0.15
ENSG00000088367.20	EPB41L1	chr20	+	36173763	36173954	36112425	36112480	36175550	36175715	75,87	33,34	91132	19,24	0.0342596	0.532,0.561	0.705,0.733	-0.172
ENSG00000088367.20	EPB41L1	chr20	+	36173883	36173954	36112425	36112480	36175550	36175715	68,78	33,34	83115	19,24	0.0418475	0.507,0.534	0.686,0.706	-0.175
ENSG00000130023.15	ERMARD	chr6	+	169775269	169775346	169773318	169773402	169775939	169776065	31,44	6,0	63,35	0,0	0.0381287	0.721,1.0	1.0,1.0	-0.139
ENSG00000117868.15	ESYT2	chr7	-	158752780	158752843	158749648	158749723	158759485	158759581	112213	389525	167225	202273	6.80326e-07	0.132,0.177	0.305,0.304	-0.15
ENSG00000175832.12	ETV4	chr17	-	43545582	43545668	43545273	43545367	43546184	43546315	46,31	5,5	20,31	11,25	0.00109092	0.821,0.756	0.476,0.383	0.359
ENSG00000175832.12	ETV4	chr17	-	43545557	43545668	43545273	43545367	43546184	43546432	61,63	5,5	58,70	11,25	0.0290346	0.859,0.863	0.725,0.583	0.207
ENSG00000187609.15	EXD3	chr9	-	137352065	137352201	137351475	137351528	137352619	137352786	20,26	0,7	3,1	0,0	0.0262125	1.0,0.65	1.0,1.0	-0.175
ENSG00000174371.16	EXO1	chr1	+	241852210	241852411	241850408	241850586	241853357	241853481	22,25	0,0	93,68	11,10	0.001314	1.0,1.0	0.809,0.773	0.209
ENSG00000174371.16	EXO1	chr1	+	241852291	241852411	241850408	241850586	241853357	241853481	32,31	0,0	123,87	11,10	0.00171272	1.0,1.0	0.848,0.813	0.169
ENSG00000144036.15	EXOC6B	chr2	-	72741303	72741469	72718106	72718307	72825797	72826019	40,51	4,6	29,44	1,0	0.0148028	0.833,0.81	0.935,1.0	-0.146
ENSG00000182473.21	EXOC7	chr17	-	76091142	76091235	76089174	76089320	76094413	76094581	60,54	165182	77120	65107	1.03988e-08	0.154,0.129	0.372,0.359	-0.224
ENSG00000182473.21	EXOC7	chr17	-	76090328	76090397	76089174	76089320	76094413	76094581	22,18	165182	33,41	65107	9.49395e-06	0.063,0.048	0.205,0.163	-0.129
ENSG00000157036.12	EXOG	chr3	+	38497628	38497778	38496271	38496530	38501354	38501494	16,14	0,0	26,27	4,2	0.0179151	1.0,1.0	0.765,0.871	0.182
ENSG00000108799.12	EZH1	chr17	-	42717975	42718067	42713208	42713389	42720272	42720449	20,25	0,1	7,22	1,8	0.00388557	1.0,0.926	0.778,0.579	0.285
ENSG00000144199.11	FAHD2B	chr2	-	97091461	97091712	97089755	97090325	97094700	97094835	12,12	0,0	9,9	2,2	0.026554	1.0,1.0	0.692,0.692	0.308
ENSG00000133193.12	FAM104A	chr17	-	73227164	73227182	73209604	73209768	73232085	73232320	30,18	1,0	23,35	7,4	0.0101246	0.96,1.0	0.726,0.876	0.179
ENSG00000166801.15	FAM111A	chr11	+	59143496	59143695	59143082	59143304	59145826	59145856	10,14	0,0	11,15	7,8	3.19158e-05	1.0,1.0	0.44,0.484	0.538
ENSG00000100376.11	FAM118A	chr22	+	45327841	45328063	45323174	45323427	45330602	45330731	13,16	0,0	20,24	2,5	0.00593772	1.0,1.0	0.833,0.706	0.231
ENSG00000175182.13	FAM131A	chr3	+	184337310	184337371	184335925	184336123	184341723	184341817	13,12	5,5	11,4	0,1	0.0221309	0.583,0.564	1.0,0.683	-0.268
ENSG00000138640.14	FAM13A	chr4	-	88805010	88805052	88790585	88790627	88851019	88851183	47,78	0,0	23,33	1,5	0.0237596	1.0,1.0	0.936,0.806	0.129
ENSG00000031003.10	FAM13B	chr5	-	137946227	137946311	137945901	137945997	137948954	137949184	31,40	1,2	25,27	8,4	0.0445018	0.939,0.909	0.61,0.771	0.233
ENSG00000138286.14	FAM149B1	chr10	+	73235192	73235318	73234816	73234940	73239311	73239390	64,63	0,3	37,35	7,8	0.00188319	1.0,0.913	0.725,0.686	0.251
ENSG00000138286.14	FAM149B1	chr10	+	73177845	73177973	73174686	73174791	73192555	73192698	39,54	0,0	49,54	2,6	0.00994289	1.0,1.0	0.925,0.818	0.129
ENSG00000138286.14	FAM149B1	chr10	+	73177845	73177975	73174686	73174791	73192555	73192698	39,79	0,0	60,59	2,6	0.0117679	1.0,1.0	0.938,0.831	0.116
ENSG00000160767.20	FAM189B	chr1	-	155254399	155254456	155253681	155253732	155254652	155255483	0,0	3,7	4,4	6,5	0.00385639	0.0,0.0	0.27,0.308	-0.289
ENSG00000172366.19	FAM195A	chr16	+	647782	647884	647416	647544	648119	648437	115139	11,10	122197	2,2	0.00181201	0.839,0.874	0.968,0.98	-0.117
ENSG00000172366.19	FAM195A	chr16	+	647782	647849	647416	647544	648119	648474	65,73	11,10	54107	2,2	0.00360497	0.753,0.79	0.933,0.965	-0.177
ENSG00000108021.19	FAM208B	chr10	+	5712393	5712539	5709529	5709663	5712822	5712872	46,48	0,2	31,39	6,11	0.00053186	1.0,0.923	0.721,0.639	0.282
ENSG00000153310.18	FAM49B	chr8	-	129904498	129904585	129903311	129903346	129939607	129939754	14,10	0,5	17,28	0,0	0.0442902	1.0,0.5	1.0,1.0	-0.25
ENSG00000262919.7	FAM58A	chrX	-	153598290	153598412	153596003	153596187	153598961	153599116	7,7	14,11	0,0	5,8	0.0021074	0.2,0.241	0.0,0.0	0.221
ENSG00000180488.14	FAM73A	chr1	+	77859313	77859386	77858937	77859056	77860039	77860126	34,36	5,5	46,30	0,0	0.000917494	0.773,0.783	1.0,1.0	-0.222
ENSG00000130244.12	FAM98C	chr19	+	38405374	38405421	38404922	38405113	38405518	38409083	17,28	0,0	18,31	2,5	0.0110417	1.0,1.0	0.845,0.789	0.183
ENSG00000115392.11	FANCL	chr2	-	58163028	58163074	58161622	58161638	58163433	58163517	11,16	1,4	28,30	0,0	0.0221014	0.87,0.709	1.0,1.0	-0.211
ENSG00000138399.17	FASTKD1	chr2	-	169569183	169569252	169563224	169563350	169571652	169572171	48,30	0,0	43,44	14,4	0.00014919	1.0,1.0	0.609,0.848	0.272
ENSG00000156860.15	FBRS	chr16	+	30661179	30661215	30660262	30660442	30662419	30662468	2,11	8,1	12,13	0,1	0.0198808	0.143,0.88	1.0,0.897	-0.437
ENSG00000214050.7	FBXO16	chr8	-	28473771	28473807	28463611	28463818	28483347	28483462	15,18	6,8	31,33	2,4	0.0445228	0.625,0.6	0.912,0.846	-0.266
ENSG00000103264.15	FBXO31	chr16	-	87358410	87358497	87347173	87347250	87360294	87360366	9,4	18,25	0,3	27,32	0.0286493	0.2,0.074	0.0,0.045	0.115
ENSG00000145868.16	FBXO38	chr5	+	148427212	148427722	148425578	148425701	148433423	148433524	152152	13,18	98120	20,30	0.0399468	0.854,0.809	0.71,0.667	0.143
ENSG00000132879.13	FBXO44	chr1	+	11658532	11658628	11658266	11658364	11658735	11658871	42,17	13,8	5,9	15,15	0.00117097	0.618,0.515	0.143,0.231	0.38
ENSG00000109670.13	FBXW7	chr4	-	152382188	152382366	152350041	152350124	152411302	152411878	4,4	13,4	0,0	12,7	0.00670047	0.133,0.333	0.0,0.0	0.233
ENSG00000109670.13	FBXW7	chr4	-	152412479	152412529	152411159	152411872	152535126	152535240	41,16	3,4	32,32	1,0	0.0285879	0.889,0.702	0.95,1.0	-0.179
ENSG00000174989.12	FBXW8	chr12	+	116918530	116918726	116910964	116911157	116928022	116928127	0,3	18,23	12,2	11,8	0.0132546	0.0,0.061	0.353,0.111	-0.201
ENSG00000174989.12	FBXW8	chr12	+	116918530	116918726	116910955	116911355	116928022	116928127	0,5	26,14	11,5	4,8	0.0145947	0.0,0.152	0.579,0.238	-0.332
ENSG00000197948.10	FCHSD1	chr5	-	141643000	141643088	141641701	141641757	141644217	141644438	25,36	3,5	8,14	0,0	0.00830586	0.806,0.783	1.0,1.0	-0.206
ENSG00000151422.12	FER	chr5	+	108897962	108898132	108897658	108897848	108946129	108946222	13,4	5,21	0,2	20,18	0.011899	0.565,0.087	0.0,0.053	0.299
ENSG00000139132.14	FGD4	chr12	+	32594215	32594454	32581959	32582467	32598496	32598586	10,1	17,31	0,0	19,21	0.0123825	0.227,0.016	0.0,0.0	0.121
ENSG00000225733.5	FGD5-AS1	chr3	-	14947113	14947209	14945023	14946154	14948012	14948424	0,7	48,33	10,8	19,17	0.00825345	0.0,0.096	0.208,0.19	-0.151
ENSG00000077782.19	FGFR1	chr8	-	38423024	38423175	38421796	38421941	38424508	38424699	9,7	105,71	15,27	65,50	0.00191246	0.041,0.047	0.103,0.213	-0.114
ENSG00000172456.17	FGGY	chr1	+	59331842	59332032	59321535	59321750	59339957	59340069	0,1	5,22	4,5	5,13	0.00829549	0.0,0.022	0.286,0.161	-0.212
ENSG00000115641.18	FHL2	chr2	-	105396646	105396697	105386360	105386540	105398969	105399061	19,22	6,8	17,14	2,0	0.0308264	0.649,0.616	0.832,1.0	-0.283
ENSG00000096060.14	FKBP5	chr6	-	35587033	35587117	35580035	35580221	35591129	35591220	9,28	0,6	83109	0,0	0.0124633	1.0,0.7	1.0,1.0	-0.15
ENSG00000196924.14	FLNA	chrX	-	154357250	154357274	154354824	154355072	154357433	154357623	13021898	9931011	14731450	364385	2.00983e-08	0.497,0.586	0.753,0.739	-0.205
ENSG00000132589.15	FLOT2	chr17	-	28885856	28885947	28883176	28883231	28888944	28889026	35,32	12,11	35,36	1,4	0.0157146	0.593,0.593	0.946,0.818	-0.289
ENSG00000125848.9	FLRT3	chr20	-	14328063	14328200	14323994	14327558	14329133	14329327	0,1	22,23	6,5	13,36	0.0178543	0.0,0.021	0.187,0.065	-0.116
ENSG00000161791.13	FMNL3	chr12	-	49658441	49658594	49657081	49657190	49661965	49662049	5,0	5,3	9,13	0,1	0.000158324	0.333,0.0	1.0,0.867	-0.767
ENSG00000115414.18	FN1	chr2	-	215392930	215393203	215391631	215391814	215394527	215394719	319761	418889	397666	284475	0.000756694	0.276,0.3	0.411,0.412	-0.123
ENSG00000115414.18	FN1	chr2	-	215393077	215393203	215391631	215391814	215394527	215394719	143407	418889	210336	284475	0.000816295	0.146,0.186	0.27,0.261	-0.1
ENSG00000168522.12	FNTA	chr8	+	43064100	43064215	43056329	43056546	43069554	43069659	43,66	0,1	57,58	5,3	0.0396589	1.0,0.971	0.851,0.906	0.107
ENSG00000188352.12	FOCAD	chr9	+	20658690	20658826	20658308	20658459	20715321	20715410	49,54	0,0	30,36	3,3	0.0194701	1.0,1.0	0.833,0.857	0.155
ENSG00000175592.8	FOSL1	chr11	-	65894013	65894116	65892644	65893296	65896808	65897006	1,4	7,4	26,32	2,5	0.000608779	0.067,0.333	0.867,0.762	-0.615
ENSG00000175592.8	FOSL1	chr11	-	65894013	65894121	65893003	65893296	65896808	65897006	8,13	7,4	46,52	2,5	0.0199466	0.364,0.619	0.92,0.839	-0.388
ENSG00000136877.14	FPGS	chr9	+	127810944	127811011	127810030	127810106	127813194	127814081	44,36	0,0	17,28	4,2	0.00802154	1.0,1.0	0.686,0.878	0.218
ENSG00000282826.1	FRG1CP	chr20	-	28583869	28583946	28583018	28583110	28586298	28586403	49,67	20,26	24,64	4,7	0.0222826	0.551,0.563	0.75,0.821	-0.229
ENSG00000172159.15	FRMD3	chr9	-	83349678	83349757	83343189	83343287	83389603	83389708	41,38	0,7	12,29	0,0	0.0279287	1.0,0.731	1.0,1.0	-0.135
ENSG00000106701.11	FSD1L	chr9	+	105484380	105484502	105471903	105472005	105506398	105506608	13,14	0,0	5,12	4,1	0.00825345	1.0,1.0	0.385,0.857	0.379
ENSG00000106701.11	FSD1L	chr9	+	105484423	105484502	105471903	105472005	105506398	105506475	11,9	0,0	5,12	4,1	0.0082587	1.0,1.0	0.385,0.857	0.379
ENSG00000114416.17	FXR1	chr3	+	180914651	180914995	180912684	180912736	180933333	180933386	0,0	5,10	4,3	2,14	0.0143614	0.0,0.0	0.5,0.097	-0.298
ENSG00000154727.10	GABPA	chr21	+	25739879	25740032	25735383	25735578	25741572	25741675	1,0	13,19	5,3	15,10	0.027045	0.037,0.0	0.143,0.13	-0.118
ENSG00000128242.12	GAL3ST1	chr22	-	30563229	30563278	30557261	30557401	30564824	30564901	0,3	15,1	1,1	0,0	9.15523e-06	0.0,0.64	1.0,1.0	-0.68
ENSG00000156958.14	GALK2	chr15	+	49281986	49282101	49239219	49239367	49283565	49283718	62,65	4,2	48,60	13,13	0.00388557	0.886,0.942	0.649,0.698	0.24
ENSG00000156958.14	GALK2	chr15	+	49281986	49282089	49239219	49239367	49283565	49283718	62,65	4,2	49,59	13,13	0.00388557	0.886,0.942	0.653,0.694	0.24
ENSG00000156958.14	GALK2	chr15	+	49281986	49282085	49239220	49239367	49283565	49283718	106151	4,2	116114	13,13	0.00418764	0.93,0.974	0.817,0.814	0.137
ENSG00000165219.21	GAPVD1	chr9	+	125342218	125342299	125341176	125341264	125346818	125346941	88,88	17,15	136166	12,5	0.0130991	0.721,0.746	0.85,0.943	-0.163
ENSG00000141013.14	GAS8	chr16	+	90035715	90035879	90032717	90032924	90036380	90036586	1,1	17,15	11,6	8,10	0.000728753	0.029,0.032	0.407,0.231	-0.288
ENSG00000167491.17	GATAD2A	chr19	+	19501968	19502043	19501120	19501416	19502330	19502526	71,70	3,7	83,79	1,0	0.00992331	0.922,0.833	0.976,1.0	-0.111
ENSG00000070610.14	GBA2	chr9	-	35743275	35743326	35740824	35741064	35744296	35744391	6,8	0,0	12,8	14,9	1.5972e-05	1.0,1.0	0.333,0.341	0.663
ENSG00000070610.14	GBA2	chr9	-	35741793	35741890	35740824	35741064	35744296	35744412	20,11	0,0	12,31	14,9	3.95809e-05	1.0,1.0	0.3,0.633	0.533
ENSG00000070610.14	GBA2	chr9	-	35741671	35741890	35740824	35741064	35744296	35744412	65,57	0,0	102118	14,9	0.000125881	1.0,1.0	0.785,0.868	0.173
ENSG00000070610.14	GBA2	chr9	-	35741671	35741908	35740824	35741064	35744296	35744412	45,46	0,0	91,89	14,9	0.000131143	1.0,1.0	0.765,0.832	0.202
ENSG00000006625.17	GGCT	chr7	-	30500535	30500681	30496622	30497235	30504568	30504799	37,52	0,0	48,58	5,4	0.00705483	1.0,1.0	0.828,0.879	0.147
ENSG00000115419.12	GLS	chr2	+	190920214	190920248	190919627	190919677	190921023	190921056	9,20	0,0	14,13	4,1	0.0301899	1.0,1.0	0.704,0.898	0.199
ENSG00000016864.16	GLT8D1	chr3	-	52704723	52704952	52700444	52700496	52705446	52705764	27,31	6,7	27,27	18,20	0.0346221	0.692,0.689	0.429,0.403	0.274
ENSG00000250903.8	GMDS-AS1	chr6	+	2263600	2263684	2248836	2248926	2398576	2398747	6,35	4,2	20,14	0,0	0.00652886	0.429,0.897	1.0,1.0	-0.337
ENSG00000250903.8	GMDS-AS1	chr6	+	2397220	2397626	2248836	2248926	2398576	2398664	15,17	4,2	4,5	0,0	0.00691132	0.652,0.81	1.0,1.0	-0.269
ENSG00000255769.7	GOLGA2P10	chr15	-	82477837	82477923	82477452	82477582	82513665	82513904	15,30	8,20	41,36	6,5	0.00681216	0.484,0.429	0.774,0.783	-0.322
ENSG00000255769.7	GOLGA2P10	chr15	-	82477837	82477926	82477393	82477582	82513665	82513950	22,38	8,20	45,41	6,5	0.0229276	0.579,0.487	0.789,0.804	-0.264
ENSG00000090615.12	GOLGA3	chr12	-	132826813	132826967	132821995	132822311	132827606	132827713	0,0	16,13	6,3	16,8	0.00604321	0.0,0.0	0.158,0.158	-0.158
ENSG00000108587.14	GOSR1	chr17	+	30510884	30510909	30492678	30492753	30519938	30520432	25,23	0,2	22,25	13,22	7.92108e-06	1.0,0.895	0.558,0.458	0.44
ENSG00000160818.16	GPATCH4	chr1	-	156598420	156598494	156598226	156598319	156598967	156599104	47,58	7,0	144158	1,0	0.0257878	0.77,1.0	0.986,1.0	-0.108
ENSG00000125772.12	GPCPD1	chr20	-	5599289	5599463	5598724	5598821	5604363	5604440	13,7	39,24	1,8	57,70	0.0128636	0.143,0.127	0.009,0.054	0.104
ENSG00000171723.15	GPHN	chr14	+	66924193	66924292	66922665	66922938	66965190	66965325	27,37	4,6	35,39	0,0	0.000693714	0.771,0.755	1.0,1.0	-0.237
ENSG00000171723.15	GPHN	chr14	+	66924196	66924292	66922665	66922938	66965190	66965325	26,20	4,6	16,15	0,0	0.00117127	0.765,0.625	1.0,1.0	-0.305
ENSG00000173264.13	GPR137	chr11	+	64288064	64288214	64287720	64287946	64288339	64288468	69,34	0,0	44,54	2,6	0.0075364	1.0,1.0	0.917,0.818	0.133
ENSG00000173264.13	GPR137	chr11	+	64287720	64287946	64286964	64287014	64288339	64288468	13,12	6,0	34,26	0,0	0.022096	0.52,1.0	1.0,1.0	-0.24
ENSG00000077585.13	GPR137B	chr1	+	236178413	236178636	236168700	236168755	236179878	236180028	59,81	11,0	43,66	0,0	0.0110417	0.728,1.0	1.0,1.0	-0.136
ENSG00000075240.16	GRAMD4	chr22	+	46676624	46676668	46675467	46675552	46677146	46679785	17,27	0,0	22,26	6,0	0.0322865	1.0,1.0	0.694,1.0	0.153
ENSG00000137106.17	GRHPR	chr9	+	37424844	37424971	37422695	37422805	37425921	37425994	39,29	10,4	61,49	3,1	0.0220345	0.661,0.784	0.91,0.961	-0.213
ENSG00000137106.17	GRHPR	chr9	+	37424844	37424977	37422665	37422805	37425921	37425994	39,29	10,4	56,52	3,1	0.0239992	0.661,0.784	0.903,0.963	-0.211
ENSG00000137106.17	GRHPR	chr9	+	37424844	37424986	37422695	37422805	37425921	37425994	39,30	10,4	55,49	3,1	0.0308264	0.661,0.789	0.902,0.961	-0.206
ENSG00000137106.17	GRHPR	chr9	+	37424844	37424974	37422695	37422805	37425921	37425994	45,29	10,4	55,49	3,1	0.0346221	0.692,0.784	0.902,0.961	-0.194
ENSG00000068400.13	GRIPAP1	chrX	-	48981794	48981872	48981595	48981691	48982978	48983092	132123	0,0	96138	3,12	0.000492771	1.0,1.0	0.941,0.852	0.104
ENSG00000186088.15	GSAP	chr7	-	77323646	77323749	77321328	77321403	77326211	77326273	21,16	6,1	12,21	0,0	0.00471272	0.636,0.889	1.0,1.0	-0.238
ENSG00000186088.15	GSAP	chr7	-	77323646	77323742	77321332	77321403	77326211	77326273	62,36	6,1	34,38	0,0	0.0207379	0.838,0.947	1.0,1.0	-0.108
ENSG00000197448.13	GSTK1	chr7	+	143265166	143265296	143264934	143265092	143267616	143267733	224254	6,5	214248	18,22	0.00254379	0.949,0.962	0.856,0.849	0.103
ENSG00000121964.14	GTDC1	chr2	-	143970652	143970762	143952772	143952843	144007181	144007535	8,13	6,3	16,13	0,0	0.000157904	0.4,0.684	1.0,1.0	-0.458
ENSG00000138867.16	GUCD1	chr22	-	24543841	24544078	24540437	24543100	24546913	24547005	12,3	0,0	11,9	8,4	0.000110747	1.0,1.0	0.407,0.529	0.532
ENSG00000138867.16	GUCD1	chr22	-	24543841	24543954	24540422	24543100	24546913	24546994	12,3	0,0	11,11	8,4	0.000164873	1.0,1.0	0.407,0.579	0.507
ENSG00000138867.16	GUCD1	chr22	-	24543841	24544083	24540422	24543100	24546913	24546994	109,63	0,0	36,64	8,4	0.000217306	1.0,1.0	0.692,0.889	0.21
ENSG00000138867.16	GUCD1	chr22	-	24554948	24555136	24548916	24549001	24555614	24555859	101,54	26,32	22,51	45,46	0.022254	0.66,0.458	0.196,0.357	0.283
ENSG00000169919.16	GUSB	chr7	-	65979833	65979911	65979398	65979541	65980223	65980409	49,38	0,0	35,38	4,2	0.0316129	1.0,1.0	0.814,0.905	0.141
ENSG00000131373.14	HACL1	chr3	-	15591599	15591680	15582876	15582989	15596383	15596424	64,20	8,0	24,28	0,0	0.0177977	0.8,1.0	1.0,1.0	-0.1
ENSG00000131373.14	HACL1	chr3	-	15585247	15585342	15582876	15582989	15586524	15586602	41,45	0,0	58,65	1,7	0.0200396	1.0,1.0	0.967,0.823	0.105
ENSG00000137814.9	HAUS2	chr15	+	42558197	42558290	42548837	42548965	42559338	42559408	30,34	4,8	49,47	1,2	0.0262667	0.789,0.68	0.961,0.922	-0.207
ENSG00000103145.10	HCFC1R1	chr16	-	3023473	3023548	3023232	3023361	3023846	3024273	330345	45,46	132160	47,59	4.29008e-05	0.786,0.789	0.584,0.576	0.208
ENSG00000103145.10	HCFC1R1	chr16	-	3023473	3023530	3023232	3023361	3023846	3024246	433417	45,46	190227	47,59	0.000450345	0.842,0.834	0.692,0.681	0.151
ENSG00000061273.17	HDAC7	chr12	-	47795905	47796016	47795586	47795767	47796206	47796298	37,49	8,24	15,18	33,24	0.00175466	0.698,0.505	0.185,0.273	0.372
ENSG00000147099.19	HDAC8	chrX	-	72495155	72495268	72488932	72489041	72567888	72568030	18,54	10,1	58,49	0,1	0.0144214	0.474,0.964	1.0,0.961	-0.261
ENSG00000167220.11	HDHD2	chr18	-	47137234	47137296	47136338	47136449	47150377	47150498	18,12	0,3	11,10	7,12	0.0154094	1.0,0.681	0.456,0.308	0.459
ENSG00000167220.11	HDHD2	chr18	-	47137234	47137333	47136338	47136449	47150377	47150520	18,13	0,3	11,12	7,12	0.0157146	1.0,0.684	0.44,0.333	0.456
ENSG00000167220.11	HDHD2	chr18	-	47137234	47137338	47136338	47136449	47150377	47150459	18,12	0,3	12,12	7,12	0.024494	1.0,0.667	0.462,0.333	0.436
ENSG00000167220.11	HDHD2	chr18	-	47137234	47137312	47136338	47136449	47150377	47150520	18,12	0,3	12,12	7,12	0.024494	1.0,0.667	0.462,0.333	0.436
ENSG00000068097.14	HEATR6	chr17	-	60073745	60074159	60073163	60073279	60076129	60076185	58,68	2,0	62,62	9,8	0.00216623	0.935,1.0	0.775,0.795	0.182
ENSG00000068097.14	HEATR6	chr17	-	60073745	60073886	60073163	60073279	60076129	60076237	74,95	2,0	93,90	9,8	0.00342022	0.949,1.0	0.838,0.849	0.131
ENSG00000165338.16	HECTD2	chr10	+	91487681	91487778	91485164	91485303	91491199	91491307	19,42	2,4	30,20	0,0	0.0294091	0.826,0.84	1.0,1.0	-0.167
ENSG00000173064.10	HECTD4	chr12	-	112164108	112164275	112163541	112163737	112167316	112167538	27,18	8,0	49,35	0,0	0.008332	0.628,1.0	1.0,1.0	-0.186
ENSG00000114735.9	HEMK1	chr3	+	50572099	50572208	50571709	50571801	50577051	50577132	6,9	0,0	18,9	4,1	0.0166188	1.0,1.0	0.692,0.818	0.245
ENSG00000114735.9	HEMK1	chr3	+	50572076	50572208	50571709	50571801	50577051	50577132	6,17	0,0	20,15	4,1	0.0262667	1.0,1.0	0.714,0.882	0.202
ENSG00000114735.9	HEMK1	chr3	+	50578820	50578926	50577508	50577573	50579843	50579939	22,31	0,3	23,21	4,15	0.0304675	1.0,0.838	0.742,0.412	0.342
ENSG00000276550.4	HERC2P2	chr15	+	22562642	22562731	22561907	22561934	22562948	22563087	2,0	6,15	5,8	2,3	0.000191736	0.143,0.0	0.556,0.571	-0.492
ENSG00000138641.15	HERC3	chr4	+	88667891	88668081	88667376	88667488	88669859	88670023	12,56	7,3	20,21	0,0	0.00413092	0.462,0.903	1.0,1.0	-0.318
ENSG00000138641.15	HERC3	chr4	+	88597949	88598087	88595556	88595614	88605794	88606049	0,0	10,19	2,3	4,4	0.0239978	0.0,0.0	0.2,0.273	-0.237
ENSG00000169660.15	HEXDC	chr17	+	82440472	82440613	82439999	82440334	82440996	82441075	15,8	2,3	6,8	0,0	0.00952501	0.789,0.571	1.0,1.0	-0.32
ENSG00000010704.18	HFE	chr6	+	26094185	26094218	26093120	26093232	26094403	26095020	12,17	2,6	38,25	1,0	0.00313177	0.805,0.66	0.963,1.0	-0.249
ENSG00000196312.11	HIATL2	chr9	-	96933798	96933915	96918642	96918826	96942602	96942752	13,12	5,0	9,6	0,0	0.0401662	0.565,1.0	1.0,1.0	-0.218
ENSG00000196312.11	HIATL2	chr9	-	96933783	96933915	96918642	96918826	96942602	96942752	15,14	5,0	7,8	0,0	0.0424798	0.6,1.0	1.0,1.0	-0.2
ENSG00000196312.11	HIATL2	chr9	-	96918642	96918826	96898065	96898127	96949554	96949585	23,13	5,0	19,18	0,0	0.0462325	0.697,1.0	1.0,1.0	-0.151
ENSG00000064393.15	HIPK2	chr7	-	139741648	139741845	139715931	139717015	139777604	139777778	5,10	10,15	0,3	24,37	0.000709494	0.2,0.25	0.0,0.039	0.206
ENSG00000110422.11	HIPK3	chr11	+	33348165	33348228	33347851	33348013	33348521	33348818	66,84	100110	46,89	30,55	0.00466244	0.259,0.288	0.448,0.462	-0.182
ENSG00000181666.17	HKR1	chr19	+	37324795	37324936	37324207	37324265	37347189	37347316	14,18	22,16	8,11	2,1	0.0161425	0.241,0.36	0.667,0.846	-0.456
ENSG00000147421.17	HMBOX1	chr8	+	28980070	28980156	28970042	28970519	29009071	29009182	74,72	12,5	53103	4,0	0.0422156	0.755,0.878	0.869,1.0	-0.118
ENSG00000113161.15	HMGCR	chr5	+	75355055	75355214	75354502	75354697	75355364	75355522	135104	0,2	215198	12,17	0.000762041	1.0,0.963	0.9,0.853	0.105
ENSG00000205581.10	HMGN1	chr21	-	39347915	39347952	39347378	39347483	39348291	39348339	0,0	23,18	5,5	20,14	0.00267465	0.0,0.0	0.142,0.191	-0.166
ENSG00000092199.17	HNRNPC	chr14	-	21263310	21263582	21234030	21234229	21269297	21269425	504556	122191	9111019	143199	0.018147	0.674,0.593	0.761,0.719	-0.107
ENSG00000110756.17	HPS5	chr11	-	18291441	18292019	18287892	18288013	18295019	18295169	48,60	0,0	56,62	4,3	0.0346982	1.0,1.0	0.875,0.912	0.107
ENSG00000167733.13	HSD11B1L	chr19	+	5684988	5685119	5684780	5684905	5686899	5686991	18,12	3,4	5,6	0,0	0.00267246	0.75,0.6	1.0,1.0	-0.325
ENSG00000165868.12	HSPA12A	chr10	-	116681790	116681877	116681151	116681256	116683812	116683962	56,64	9,0	32,39	0,0	0.020761	0.757,1.0	1.0,1.0	-0.121
ENSG00000166411.13	IDH3A	chr15	+	78156907	78157162	78155212	78155275	78157547	78157631	13,4	28,38	0,4	58,72	0.00212475	0.188,0.05	0.0,0.027	0.105
ENSG00000187535.13	IFT140	chr16	-	1568216	1568334	1566160	1566291	1580758	1580850	14,15	0,0	9,12	1,4	0.00858127	1.0,1.0	0.818,0.6	0.291
ENSG00000109083.13	IFT20	chr17	-	28332145	28332181	28331858	28331987	28335339	28335439	8,32	75,86	34,44	46,66	0.00549908	0.066,0.199	0.33,0.308	-0.186
ENSG00000109083.13	IFT20	chr17	-	28332145	28332176	28331602	28331987	28335339	28335478	10,28	75,86	34,38	46,66	0.00586001	0.085,0.186	0.341,0.287	-0.178
ENSG00000109083.13	IFT20	chr17	-	28332145	28332382	28331401	28331987	28335339	28335478	44,80	75,86	84103	46,66	0.00740569	0.227,0.317	0.477,0.438	-0.185
ENSG00000073792.15	IGF2BP2	chr3	-	185649402	185649534	185647024	185647138	185652093	185652168	71,72	3,5	39,46	0,0	0.0343029	0.922,0.878	1.0,1.0	-0.1
ENSG00000132740.8	IGHMBP2	chr11	+	68930322	68930434	68929182	68929357	68933298	68933381	0,0	12,11	3,3	6,14	0.0484963	0.0,0.0	0.2,0.097	-0.149
ENSG00000263528.7	IKBKE	chr1	+	206473199	206473314	206471155	206471245	206474330	206474471	58,30	0,0	28,22	1,4	0.048591	1.0,1.0	0.933,0.733	0.167
ENSG00000160712.12	IL6R	chr1	+	154445046	154445094	154435968	154436110	154448124	154448171	6,0	11,5	0,0	26,27	0.0304101	0.246,0.0	0.0,0.0	0.123
ENSG00000184903.9	IMMP2L	chr7	-	110886592	110886687	110663415	110663721	110963499	110963565	28,62	1,2	66,86	9,14	0.0251502	0.933,0.939	0.786,0.754	0.166
ENSG00000071243.15	ING3	chr7	+	120964741	120964838	120955558	120955624	120966625	120966697	2,17	13,10	22,17	1,2	0.000816295	0.071,0.459	0.917,0.81	-0.599
ENSG00000040933.15	INPP4A	chr2	+	98545968	98546073	98543876	98544007	98552785	98552969	14,33	0,0	17,30	1,7	0.00344469	1.0,1.0	0.895,0.682	0.212
ENSG00000164941.13	INTS8	chr8	+	94824892	94825067	94823298	94823561	94827262	94827403	50,79	12,5	99,98	3,2	0.0245475	0.676,0.888	0.943,0.961	-0.17
ENSG00000164941.13	INTS8	chr8	+	94838493	94838618	94836523	94836631	94841490	94841591	48,35	0,0	68,60	5,3	0.0263975	1.0,1.0	0.872,0.909	0.109
ENSG00000068745.14	IP6K2	chr3	-	48708119	48708237	48695129	48695418	48717156	48717210	2,0	5,18	4,6	7,13	0.0491696	0.167,0.0	0.222,0.187	-0.121
ENSG00000173226.16	IQCB1	chr3	-	121828469	121828632	121826050	121826180	121828860	121828972	48,35	0,2	42,50	4,16	0.00524491	1.0,0.897	0.84,0.61	0.224
ENSG00000173226.16	IQCB1	chr3	-	121828469	121828532	121826050	121826180	121828860	121828972	24,16	0,2	22,19	4,16	0.0152771	1.0,0.809	0.745,0.386	0.339
ENSG00000124313.12	IQSEC2	chrX	-	53279563	53279659	53255799	53256061	53281495	53281594	0,28	5,1	10,17	1,0	0.0349039	0.0,0.933	0.833,1.0	-0.45
ENSG00000150093.18	ITGB1	chr10	-	32935982	32936081	32935491	32935558	32936216	32936423	0,0	3,10	3,3	1,2	0.000807784	0.0,0.0	0.6,0.429	-0.514
ENSG00000150995.18	ITPR1	chr3	+	4653841	4653886	4652122	4652218	4658123	4658278	15,53	0,1	20,20	5,2	0.0124813	1.0,0.97	0.711,0.86	0.2
ENSG00000205726.13	ITSN1	chr21	+	33823486	33823653	33819240	33819323	33826817	33826863	45,45	13,3	44,40	2,0	0.0159721	0.634,0.882	0.917,1.0	-0.201
ENSG00000008083.13	JARID2	chr6	+	15410223	15410365	15374116	15374252	15452005	15452175	25,65	5,4	43,61	1,0	0.0117196	0.714,0.89	0.956,1.0	-0.176
ENSG00000161999.11	JMJD8	chr16	-	682952	683060	681702	682874	683166	683234	183164	5,2	136161	17,8	0.012535	0.948,0.976	0.8,0.91	0.107
ENSG00000225470.6	JPX	chrX	+	73998767	73998844	73994839	73994961	73998953	74000491	19,22	7,0	16,26	0,0	0.0178417	0.576,1.0	1.0,1.0	-0.212
ENSG00000225470.6	JPX	chrX	+	73962730	73962801	73944583	73944662	73994839	73994961	0,3	30,20	9,5	19,20	0.0218355	0.0,0.07	0.191,0.111	-0.116
ENSG00000172977.12	KAT5	chr11	+	65713320	65713503	65712921	65713058	65713592	65713664	44,31	62,70	15,24	75,87	0.0193516	0.262,0.181	0.091,0.121	0.116
ENSG00000172977.12	KAT5	chr11	+	65713347	65713503	65712921	65713058	65713592	65713667	67,45	62,70	29,37	75,87	0.0442134	0.351,0.243	0.162,0.175	0.129
ENSG00000153885.14	KCTD15	chr19	+	33798263	33798390	33796845	33796987	33798670	33798766	5,8	7,4	0,2	5,11	0.0144173	0.263,0.5	0.0,0.083	0.34
ENSG00000165097.13	KDM1B	chr6	+	18185771	18185810	18171362	18171479	18197056	18197233	4,5	0,0	14,18	3,2	0.0449611	1.0,1.0	0.752,0.854	0.197
ENSG00000155666.11	KDM8	chr16	+	27220392	27220485	27218960	27219046	27220565	27221084	0,5	10,0	6,15	0,0	0.0157146	0.0,1.0	1.0,1.0	-0.5
ENSG00000119537.15	KDSR	chr18	-	63344409	63344493	63331382	63331901	63350887	63351079	50,83	7,0	25,56	0,0	0.0424798	0.781,1.0	1.0,1.0	-0.109
ENSG00000138030.12	KHK	chr2	+	27094473	27094611	27092331	27092448	27096728	27096801	16,28	0,0	25,32	1,5	0.016365	1.0,1.0	0.926,0.762	0.156
ENSG00000138030.12	KHK	chr2	+	27094476	27094611	27092331	27092448	27096728	27096801	46,37	0,0	34,48	1,5	0.0387995	1.0,1.0	0.944,0.828	0.114
ENSG00000100890.15	KIAA0391	chr14	+	35126734	35126782	35122721	35122910	35127478	35127611	37,30	0,0	27,39	4,3	0.0150272	1.0,1.0	0.802,0.886	0.156
ENSG00000047578.12	KIAA0556	chr16	+	27708704	27708787	27703895	27703998	27721557	27721695	36,42	5,2	33,40	0,1	0.039644	0.783,0.913	1.0,0.952	-0.128
ENSG00000047578.12	KIAA0556	chr16	+	27708713	27708920	27703895	27703998	27721557	27721695	36,40	5,2	26,30	0,1	0.0499059	0.783,0.909	1.0,0.938	-0.123
ENSG00000109265.12	KIAA1211	chr4	+	56298213	56298349	56272320	56272492	56307534	56307699	12,5	0,0	12,18	1,6	0.00341112	1.0,1.0	0.857,0.6	0.272
ENSG00000162929.13	KIAA1841	chr2	+	61073457	61073551	61071605	61071792	61076919	61077158	55,58	13,9	71,74	2,5	0.0207127	0.679,0.763	0.947,0.881	-0.193
ENSG00000137177.18	KIF13A	chr6	-	17789871	17789910	17787775	17787875	17794248	17794395	153151	4,8	147164	23,26	0.000748287	0.961,0.924	0.806,0.803	0.138
ENSG00000118193.11	KIF14	chr1	-	200619551	200619674	200617611	200618838	200620410	200620734	0,2	18,24	15,4	37,25	0.011899	0.0,0.04	0.169,0.074	-0.101
ENSG00000089177.17	KIF16B	chr20	-	16374256	16374409	16371664	16371761	16378804	16380163	67,79	0,1	46,60	5,3	0.0201648	1.0,0.975	0.821,0.909	0.123
ENSG00000139116.17	KIF21A	chr12	-	39311414	39311553	39309751	39309766	39319905	39320013	35,26	0,0	57,57	5,2	0.0397021	1.0,1.0	0.851,0.934	0.107
ENSG00000137807.13	KIF23	chr15	+	69425281	69425323	69423158	69423329	69426069	69426182	30,41	39,65	36,35	158123	0.00141572	0.327,0.285	0.126,0.152	0.167
ENSG00000137807.13	KIF23	chr15	+	69425278	69425323	69423158	69423329	69426069	69426182	24,21	39,65	25,20	158123	0.0144179	0.274,0.166	0.089,0.091	0.13
ENSG00000075945.12	KIFAP3	chr1	-	170055304	170055436	170046711	170046866	170074435	170074738	66,73	8,3	30,59	1,0	0.0215307	0.805,0.924	0.938,1.0	-0.104
ENSG00000140859.15	KIFC3	chr16	-	57760281	57760415	57759727	57759836	57760725	57760955	344226	25,22	346282	7,5	0.000238302	0.873,0.837	0.961,0.966	-0.109
ENSG00000140859.15	KIFC3	chr16	-	57790973	57791060	57785397	57785666	57794998	57795141	6,1	6,4	0,0	4,7	0.00807124	0.333,0.111	0.0,0.0	0.222
ENSG00000140859.15	KIFC3	chr16	-	57764142	57764172	57762194	57762270	57765458	57765640	17,26	15,3	52,39	2,1	0.011899	0.445,0.86	0.948,0.965	-0.304
ENSG00000126214.21	KLC1	chr14	+	103684985	103685036	103679407	103679518	103687080	103687211	0,2	6,10	15,9	5,4	8.23903e-05	0.0,0.104	0.636,0.568	-0.55
ENSG00000126214.21	KLC1	chr14	+	103687080	103687211	103679383	103679518	103700654	103700727	17,26	3,1	13,12	8,11	0.00553828	0.739,0.929	0.448,0.353	0.434
ENSG00000104731.13	KLHDC4	chr16	-	87707957	87708072	87703025	87703432	87708349	87708466	9,14	0,0	9,12	2,3	0.0117706	1.0,1.0	0.692,0.667	0.321
ENSG00000104731.13	KLHDC4	chr16	-	87707957	87708075	87703025	87703432	87708349	87708466	3,18	0,0	12,24	2,3	0.0369306	1.0,1.0	0.75,0.8	0.225
ENSG00000114648.11	KLHL18	chr3	+	47287219	47287348	47282958	47283094	47319652	47319783	0,2	13,9	6,7	15,11	0.0342962	0.0,0.1	0.167,0.241	-0.154
ENSG00000055609.17	KMT2C	chr7	-	152195906	152196011	152194439	152194568	152199278	152199459	43,55	8,7	22,45	0,2	0.0264062	0.729,0.797	1.0,0.918	-0.196
ENSG00000055609.17	KMT2C	chr7	-	152157760	152157925	152156204	152156343	152158862	152159072	4,23	8,0	7,7	0,0	0.0470787	0.2,1.0	1.0,1.0	-0.4
ENSG00000171435.13	KSR2	chr12	-	117471190	117471320	117469661	117469795	117476463	117476595	23,5	8,0	4,4	0,0	0.0124415	0.59,1.0	1.0,1.0	-0.205
ENSG00000126777.17	KTN1	chr14	+	55663954	55664044	55661273	55661612	55667240	55667330	385337	441398	456466	264241	1.95645e-06	0.304,0.297	0.463,0.492	-0.177
ENSG00000126777.17	KTN1	chr14	+	55663954	55664040	55661273	55661612	55667240	55667330	385338	441398	455461	264241	2.60747e-06	0.304,0.298	0.463,0.489	-0.175
ENSG00000126777.17	KTN1	chr14	+	55663954	55664041	55661521	55661612	55667240	55667330	615552	441398	704712	264241	5.23615e-06	0.411,0.409	0.571,0.596	-0.173
ENSG00000053747.15	LAMA3	chr18	+	23907549	23907666	23905525	23905624	23909152	23909295	46,46	0,0	36,50	1,6	0.0131315	1.0,1.0	0.947,0.806	0.123
ENSG00000131023.12	LATS1	chr6	-	149669021	149669120	149661093	149662238	149676259	149676366	5,5	16,17	1,0	18,18	0.0159721	0.135,0.128	0.027,0.0	0.118
ENSG00000196233.11	LCOR	chr10	+	96833776	96833841	96833405	96833479	96907264	96907330	0,0	12,15	6,2	6,11	0.00554916	0.0,0.0	0.343,0.087	-0.215
ENSG00000131981.15	LGALS3	chr14	+	55137369	55137391	55129043	55129300	55138044	55138368	29,20	6,0	16,17	0,0	0.0409538	0.788,1.0	1.0,1.0	-0.106
ENSG00000064042.17	LIMCH1	chr4	+	41638931	41638967	41619187	41619440	41644499	41644626	158201	25,37	52,76	53,81	0	0.808,0.784	0.395,0.385	0.406
ENSG00000182541.17	LIMK2	chr22	+	31225719	31225819	31212294	31212424	31258290	31258426	9,13	0,5	15,10	0,0	0.0353583	1.0,0.565	1.0,1.0	-0.218
ENSG00000237854.3	LINC00674	chr17	+	68102819	68103058	68101907	68101959	68114421	68114525	57,56	11,11	36,55	1,2	0.00748762	0.722,0.718	0.947,0.932	-0.22
ENSG00000237854.3	LINC00674	chr17	+	68102942	68103058	68101907	68101959	68114421	68114525	83,92	11,11	45,80	1,2	0.0120874	0.79,0.807	0.957,0.952	-0.156
ENSG00000215190.8	LINC00680	chr6	-	57949858	57950011	57948917	57949068	57959027	57959111	11,10	0,0	2,3	5,1	8.07916e-05	1.0,1.0	0.167,0.6	0.617
ENSG00000242086.8	LINC00969	chr3	+	195689373	195689438	195688532	195688797	195696360	195696589	0,1	11,0	1,3	1,0	0.0126463	0.0,1.0	0.343,1.0	-0.171
ENSG00000242086.8	LINC00969	chr3	+	195689338	195689438	195688532	195688797	195696360	195696541	37,21	11,0	27,22	1,0	0.036167	0.627,1.0	0.931,1.0	-0.152
ENSG00000250337.5	LINC01021	chr5	+	27477638	27477801	27475534	27475695	27484925	27485029	17,34	2,4	27,33	1,0	0.0425984	0.81,0.81	0.931,1.0	-0.155
ENSG00000261008.6	LINC01572	chr16	-	72540577	72540611	72523331	72523415	72555264	72555326	0,15	9,4	8,10	0,1	0.00275345	0.0,0.718	1.0,0.872	-0.577
ENSG00000189067.12	LITAF	chr16	-	11561145	11561574	11556611	11556735	11586885	11586919	0,0	8,22	3,4	8,24	0.0491985	0.0,0.0	0.158,0.077	-0.117
ENSG00000103227.18	LMF1	chr16	-	933990	934145	911015	911079	934243	934254	11,10	28,53	2,0	38,53	0.000442424	0.164,0.086	0.026,0.0	0.112
ENSG00000103227.18	LMF1	chr16	-	954352	954666	910930	911079	970787	970866	22,32	2,4	29,27	0,0	0.0207127	0.846,0.8	1.0,1.0	-0.177
ENSG00000123684.12	LPGAT1	chr1	-	211830182	211830330	211829178	211829319	211830572	211830722	32,36	0,0	9,32	4,3	0.00256708	1.0,1.0	0.529,0.842	0.315
ENSG00000145012.12	LPP	chr3	+	188225404	188225527	188153930	188154021	188341655	188341719	25,86	0,1	14,29	3,9	3.9557e-05	1.0,0.977	0.7,0.617	0.33
ENSG00000145012.12	LPP	chr3	+	188406111	188406307	188341655	188341719	188484591	188484704	97110	0,0	32,62	0,9	0.00379164	1.0,1.0	1.0,0.775	0.113
ENSG00000186001.12	LRCH3	chr3	+	197858833	197858905	197854391	197854445	197865422	197865471	5,18	34,20	21,24	9,9	0.00360497	0.068,0.31	0.538,0.571	-0.365
ENSG00000077454.15	LRCH4	chr7	-	100577496	100577558	100577085	100577154	100577663	100577740	28,18	6,0	32,25	0,0	0.0215307	0.714,1.0	1.0,1.0	-0.143
ENSG00000157193.14	LRP8	chr1	-	53280586	53280715	53275630	53275753	53289566	53289689	47,35	1,0	86,97	5,12	0.00900371	0.959,1.0	0.896,0.802	0.131
ENSG00000165501.16	LRR1	chr14	+	49603551	49603618	49602369	49602468	49607399	49608121	0,0	19,9	11,7	8,16	8.92215e-05	0.0,0.0	0.414,0.184	-0.299
ENSG00000160959.7	LRRC14	chr8	+	144523635	144524105	144522581	144523333	144524260	144524446	9,6	3,3	29,40	2,0	0.0109207	0.6,0.5	0.879,1.0	-0.389
ENSG00000010626.14	LRRC23	chr12	+	6909889	6910026	6907314	6907445	6912729	6912811	69,49	0,1	69,44	2,6	0.0303432	1.0,0.961	0.945,0.786	0.115
ENSG00000161328.10	LRRC56	chr11	+	552583	552702	552089	552232	553962	554916	22,3	9,0	6,2	0,0	0.010253	0.55,1.0	1.0,1.0	-0.225
ENSG00000161328.10	LRRC56	chr11	+	552568	552702	552089	552232	553962	554916	18,9	9,0	6,4	0,0	0.0141858	0.5,1.0	1.0,1.0	-0.25
ENSG00000129295.8	LRRC6	chr8	-	132632739	132632963	132625271	132625454	132637934	132638107	40,27	2,15	40,41	2,0	0.0263975	0.909,0.474	0.909,1.0	-0.263
ENSG00000175061.17	LRRC75A-AS1	chr17	+	16439677	16439703	16439036	16439414	16440110	16440253	3,13	0,10	5,6	0,0	0.0106974	1.0,0.489	1.0,1.0	-0.256
ENSG00000149657.19	LSM14B	chr20	+	62127584	62127701	62126303	62126439	62129784	62129952	9,26	42,28	43,34	25,25	0.0358357	0.097,0.317	0.462,0.405	-0.226
ENSG00000160285.14	LSS	chr21	-	46196201	46196368	46195675	46195756	46205835	46205941	83,34	0,0	27,41	4,2	0.0216616	1.0,1.0	0.771,0.911	0.159
ENSG00000049323.15	LTBP1	chr2	+	33342837	33342963	33315143	33315269	33347366	33347510	105161	0,4	112149	20,10	0.000456551	1.0,0.953	0.737,0.882	0.167
ENSG00000168056.14	LTBP3	chr11	-	65540012	65540153	65539719	65539881	65540244	65540382	44,53	46,34	10,22	47,52	0.000458201	0.324,0.438	0.096,0.175	0.245
ENSG00000090006.17	LTBP4	chr19	+	40622949	40623021	40619346	40619493	40623603	40623732	4,24	0,0	14,15	5,1	0.00512329	1.0,1.0	0.583,0.882	0.268
ENSG00000090006.17	LTBP4	chr19	+	40609745	40609871	40609529	40609661	40610531	40610657	31,40	0,0	50,35	5,1	0.0437146	1.0,1.0	0.833,0.946	0.111
ENSG00000090006.17	LTBP4	chr19	+	40622949	40623021	40622400	40622667	40623603	40623732	33,54	9,4	36,29	0,2	0.0445018	0.647,0.871	1.0,0.879	-0.18
ENSG00000102897.9	LYRM1	chr16	+	20902485	20902717	20900752	20900889	20915555	20915714	12,19	38,23	17,22	6,10	0.00524371	0.136,0.292	0.586,0.524	-0.341
ENSG00000205707.10	LYRM5	chr12	+	25203724	25203832	25195276	25195337	25203919	25204007	0,0	6,17	8,3	11,17	0.00459383	0.0,0.0	0.267,0.081	-0.174
ENSG00000127603.23	MACF1	chr1	+	39328531	39328706	39327217	39327353	39331202	39331244	0,0	30,21	3,2	4,2	0.00921791	0.0,0.0	0.273,0.333	-0.303
ENSG00000127603.23	MACF1	chr1	+	39328600	39328706	39327217	39327353	39331202	39331244	0,0	30,21	4,1	4,2	0.0160376	0.0,0.0	0.333,0.2	-0.267
ENSG00000110514.19	MADD	chr11	+	47326737	47326807	47324470	47324577	47328657	47328704	62,46	0,0	57,67	1,7	0.0170082	1.0,1.0	0.966,0.828	0.103
ENSG00000196547.14	MAN2A2	chr15	+	90910215	90910292	90909326	90909504	90910500	90910683	13,21	4,3	10,14	0,0	0.00280669	0.619,0.778	1.0,1.0	-0.301
ENSG00000196547.14	MAN2A2	chr15	+	90910089	90910292	90909326	90909504	90910500	90910683	35104	4,3	47,69	0,0	0.0418475	0.814,0.945	1.0,1.0	-0.121
ENSG00000065559.14	MAP2K4	chr17	+	12081355	12081534	12054888	12054991	12095574	12095694	99107	1,5	59101	9,10	0.024219	0.98,0.915	0.766,0.835	0.147
ENSG00000130758.7	MAP3K10	chr19	+	40205404	40205599	40205120	40205296	40205910	40206402	28,25	47,31	18,8	49,52	0.0260836	0.23,0.287	0.155,0.071	0.146
ENSG00000130758.7	MAP3K10	chr19	+	40205539	40205599	40205120	40205296	40205910	40206402	20,10	47,31	7,6	49,52	0.0442546	0.188,0.149	0.072,0.059	0.103
ENSG00000006432.15	MAP3K9	chr14	-	70735960	70736029	70734385	70734498	70738244	70738398	5,0	20,14	4,8	1,7	0.0178057	0.113,0.0	0.67,0.367	-0.462
ENSG00000071054.16	MAP4K4	chr2	+	101868028	101868037	101867211	101867309	101869621	101869797	2,16	81,95	39,35	64126	0.00185929	0.022,0.131	0.354,0.2	-0.201
ENSG00000135525.18	MAP7	chr6	-	136383670	136383781	136377754	136377868	136388392	136388510	190211	11,13	350417	52,55	0.0116165	0.896,0.89	0.771,0.791	0.112
ENSG00000162889.10	MAPKAPK2	chr1	+	206732037	206732084	206731838	206731919	206732574	206734283	6,27	123111	25,32	53,54	0.000207896	0.029,0.128	0.222,0.263	-0.164
ENSG00000089022.13	MAPKAPK5	chr12	+	111870270	111870360	111866155	111866231	111871084	111871180	36,81	11,0	73,89	0,0	0.00858127	0.621,1.0	1.0,1.0	-0.19
ENSG00000089022.13	MAPKAPK5	chr12	+	111867571	111867669	111866155	111866231	111871084	111871180	42,46	11,0	18,35	0,0	0.0136478	0.656,1.0	1.0,1.0	-0.172
ENSG00000089022.13	MAPKAPK5	chr12	+	111868752	111868861	111866155	111866231	111871084	111871180	14,9	11,0	6,12	0,0	0.0179151	0.389,1.0	1.0,1.0	-0.305
ENSG00000137802.13	MAPKBP1	chr15	+	41815258	41815405	41814549	41814739	41815623	41815799	13,16	0,0	14,17	4,1	0.0206878	1.0,1.0	0.636,0.895	0.234
ENSG00000186868.15	MAPT	chr17	+	45989877	45990075	45987039	45987095	45991459	45991586	0,5	4,12	2,2	0,1	0.0216346	0.0,0.172	1.0,0.5	-0.664
ENSG00000136536.14	MARCH7	chr2	+	159766891	159766916	159762876	159762993	159767283	159767960	18,4	10,6	0,0	4,15	1.95856e-05	0.573,0.332	0.0,0.0	0.453
ENSG00000086015.20	MAST2	chr1	+	46000958	46000979	45997723	45997799	46002804	46002883	0,0	37,22	6,6	21,32	0.00111668	0.0,0.0	0.182,0.127	-0.154
ENSG00000132561.13	MATN2	chr8	+	97994479	97994602	97978885	97979008	98003660	98004286	126,80	0,0	68,69	6,2	0.0134631	1.0,1.0	0.85,0.945	0.103
ENSG00000151332.18	MBIP	chr14	-	36308098	36308189	36300784	36300823	36311572	36311590	71,79	2,1	53,78	10,9	0.00279436	0.947,0.975	0.726,0.813	0.192
ENSG00000151332.18	MBIP	chr14	-	36308091	36308189	36300784	36300823	36311572	36311725	90,99	2,1	86105	10,9	0.00554161	0.957,0.98	0.811,0.854	0.136
ENSG00000152601.17	MBNL1	chr3	+	152456266	152456361	152447619	152447773	152459270	152459345	324299	12,40	212295	37,60	0.0167458	0.931,0.789	0.741,0.711	0.134
ENSG00000125885.13	MCM8	chr20	+	5972575	5972726	5967829	5968025	5973055	5973196	7,16	1,0	5,11	4,1	0.0431623	0.778,1.0	0.385,0.846	0.274
ENSG00000147316.12	MCPH1	chr8	+	6444392	6445547	6442066	6442156	6455142	6455252	72,72	3,0	77,72	10,4	0.0487978	0.923,1.0	0.794,0.9	0.115
ENSG00000137337.14	MDC1	chr6	-	30708135	30708357	30707383	30707454	30711411	30711504	11,21	0,1	14,27	2,6	0.020108	1.0,0.913	0.778,0.692	0.222
ENSG00000111554.14	MDM1	chr12	-	68325440	68325575	68323072	68323240	68326656	68327021	15,17	0,0	7,12	3,3	0.000842468	1.0,1.0	0.538,0.667	0.397
ENSG00000180182.10	MED14	chrX	-	40666719	40666851	40664306	40664489	40671860	40671972	66,50	0,2	59,69	6,9	0.00858127	1.0,0.926	0.831,0.793	0.151
ENSG00000124641.14	MED20	chr6	-	41909344	41909522	41906803	41907287	41916784	41916939	81,44	0,0	65,59	4,3	0.0345121	1.0,1.0	0.89,0.908	0.101
ENSG00000116604.17	MEF2D	chr1	-	156499431	156499560	156483260	156483430	156500485	156500779	0,0	19,29	5,10	14,24	0.000185836	0.0,0.0	0.152,0.172	-0.162
ENSG00000162591.15	MEGF6	chr1	-	3498697	3498826	3498370	3498499	3499137	3499266	56,80	13,4	15,14	1,0	0.0452046	0.683,0.909	0.882,1.0	-0.145
ENSG00000105419.17	MEIS3	chr19	-	47415050	47415101	47409435	47409547	47416651	47416702	36,71	0,0	31,25	3,3	0.0176228	1.0,1.0	0.858,0.829	0.157
ENSG00000165304.7	MELK	chr9	+	36594627	36594771	36589535	36589652	36597221	36597290	154148	0,2	268230	24,16	1.95856e-05	1.0,0.974	0.848,0.878	0.124
ENSG00000165304.7	MELK	chr9	+	36594669	36594771	36589535	36589652	36597221	36597294	22,33	0,2	64,39	24,16	0.000185458	1.0,0.892	0.571,0.549	0.386
ENSG00000168958.19	MFF	chr2	+	227328657	227328789	227325270	227325427	227330625	227330846	88,86	56,55	110104	23,30	0.00143701	0.44,0.439	0.705,0.634	-0.23
ENSG00000168958.19	MFF	chr2	+	227328677	227328789	227325275	227325427	227330625	227330846	241271	56,55	305264	23,30	0.00188319	0.683,0.711	0.869,0.815	-0.145
ENSG00000168958.19	MFF	chr2	+	227352513	227352573	227342744	227342819	227355676	227355761	182197	1,14	128123	17,19	0.00406484	0.99,0.884	0.803,0.778	0.147
ENSG00000168958.19	MFF	chr2	+	227332418	227332588	227325220	227325427	227355676	227355761	13,24	0,0	21,20	2,4	0.00795114	1.0,1.0	0.84,0.714	0.223
ENSG00000168958.19	MFF	chr2	+	227347225	227347384	227342744	227342819	227355676	227355761	80108	1,14	68,68	17,19	0.0188015	0.976,0.794	0.667,0.642	0.23
ENSG00000092931.11	MFSD11	chr17	+	76742176	76742273	76741968	76742048	76744321	76744473	85,57	7,5	90102	0,0	0.000583599	0.859,0.851	1.0,1.0	-0.145
ENSG00000092931.11	MFSD11	chr17	+	76743397	76743456	76741968	76742048	76744321	76744466	42,50	7,5	39,50	0,0	0.00071735	0.766,0.845	1.0,1.0	-0.195
ENSG00000092931.11	MFSD11	chr17	+	76743397	76743456	76742176	76742273	76744321	76744466	65,62	0,0	56,82	6,2	0.0197676	1.0,1.0	0.836,0.957	0.104
ENSG00000161091.12	MFSD12	chr19	-	3542775	3542977	3538274	3538756	3544808	3544939	43,12	12,8	17,19	39,22	0.0211917	0.642,0.429	0.179,0.302	0.295
ENSG00000167700.8	MFSD3	chr8	+	144510367	144510507	144509618	144510015	144510597	144510722	75,51	0,0	26,35	6,2	0.00179441	1.0,1.0	0.684,0.897	0.21
ENSG00000167700.8	MFSD3	chr8	+	144510424	144510507	144509079	144510015	144510597	144510722	72,50	0,0	28,35	6,2	0.00197932	1.0,1.0	0.7,0.897	0.202
ENSG00000167889.12	MGAT5B	chr17	+	76933291	76933297	76932644	76932775	76937987	76938143	5,11	9,9	7,5	32,35	0.0389554	0.341,0.533	0.17,0.118	0.293
ENSG00000243156.7	MICAL3	chr22	-	17985325	17985550	17906548	17906886	18001392	18001501	0,1	1,21	1,5	5,9	0.0490661	0.0,0.023	0.091,0.217	-0.142
ENSG00000151338.18	MIPOL1	chr14	+	37227725	37227838	37219552	37219691	37247102	37247240	11,9	0,0	6,11	1,5	0.00144908	1.0,1.0	0.75,0.524	0.363
ENSG00000215386.10	MIR99AHG	chr21	+	16537378	16537439	16487489	16487538	16606993	16607268	23,18	0,0	22,18	6,4	0.000491175	1.0,1.0	0.664,0.708	0.314
ENSG00000167842.15	MIS12	chr17	+	5487000	5487063	5486576	5486684	5488195	5488589	6,6	12,8	0,3	29,35	0.00163939	0.21,0.285	0.0,0.043	0.226
ENSG00000129534.13	MIS18BP1	chr14	-	45252817	45252923	45250030	45250138	45253034	45253177	0,0	1,14	3,4	5,8	0.0125201	0.0,0.0	0.231,0.2	-0.216
ENSG00000155229.20	MMS19	chr10	-	97476834	97476919	97476728	97476744	97477346	97477416	67,84	0,1	55,57	12,7	2.17102e-05	1.0,0.977	0.696,0.803	0.239
ENSG00000155229.20	MMS19	chr10	-	97476834	97476963	97476682	97476744	97477346	97477416	142181	0,1	114107	12,7	2.32718e-05	1.0,0.989	0.826,0.884	0.139
ENSG00000123562.16	MORF4L2	chrX	-	103678500	103678620	103676978	103677051	103684680	103684729	15,23	0,0	19,18	3,7	0.000456551	1.0,1.0	0.76,0.563	0.339
ENSG00000123562.16	MORF4L2	chrX	-	103678500	103678651	103676978	103677051	103684680	103684729	45,40	0,0	49,42	3,7	0.00245561	1.0,1.0	0.891,0.75	0.179
ENSG00000123562.16	MORF4L2	chrX	-	103678500	103678600	103676978	103677051	103684680	103684729	80,80	0,0	53,85	3,7	0.00373828	1.0,1.0	0.898,0.859	0.121
ENSG00000123562.16	MORF4L2	chrX	-	103684680	103684729	103678500	103678651	103685170	103685260	201318	161170	254324	97116	0.0255001	0.425,0.526	0.608,0.624	-0.14
ENSG00000171160.17	MORN4	chr10	-	97619586	97619683	97617207	97617322	97633346	97633480	30,20	0,0	8,15	6,0	0.0330189	1.0,1.0	0.4,1.0	0.3
ENSG00000155363.18	MOV10	chr1	+	112699457	112699612	112698714	112698789	112699684	112699810	4,10	12,25	2,0	31,27	0.00214713	0.143,0.167	0.031,0.0	0.14
ENSG00000107186.16	MPDZ	chr9	-	13122086	13122170	13121738	13121932	13123152	13123298	80134	0,2	72,85	11,3	0.00373785	1.0,0.971	0.766,0.934	0.135
ENSG00000178802.17	MPI	chr15	+	74897010	74897219	74896151	74896325	74897511	74898228	195204	5,10	94,97	7,16	0.0391439	0.951,0.911	0.87,0.752	0.12
ENSG00000008382.15	MPND	chr19	+	4354948	4355021	4354323	4354420	4355096	4355173	15,10	6,0	16,18	0,0	0.0203352	0.556,1.0	1.0,1.0	-0.222
ENSG00000105926.15	MPP6	chr7	+	24661840	24661883	24650484	24650712	24663589	24663721	2,1	17,37	11,4	29,22	0.0314661	0.068,0.017	0.192,0.102	-0.104
ENSG00000037757.13	MRI1	chr19	+	13765953	13766129	13764870	13765109	13768358	13768557	55,74	2,0	73,80	7,7	0.0178057	0.932,1.0	0.839,0.851	0.121
ENSG00000037757.13	MRI1	chr19	+	13765953	13766065	13764870	13765109	13768358	13768680	39,60	2,0	54,68	7,7	0.0192923	0.907,1.0	0.794,0.829	0.142
ENSG00000147586.9	MRPS28	chr8	-	80028694	80028796	80002998	80003180	80029760	80029912	2,0	13,8	6,10	4,1	0.000443614	0.071,0.0	0.429,0.833	-0.596
ENSG00000147586.9	MRPS28	chr8	-	80028694	80028796	80002998	80003180	80030053	80030232	2,0	13,6	9,10	19,6	0.0158799	0.071,0.0	0.191,0.455	-0.288
ENSG00000147586.9	MRPS28	chr8	-	80028694	80028796	80002998	80003180	80030020	80030232	2,0	24,10	6,11	36,23	0.0359132	0.04,0.0	0.077,0.193	-0.115
ENSG00000170903.10	MSANTD4	chr11	-	106020961	106021101	106010455	106011067	106021835	106022250	0,4	18,16	4,10	7,13	0.0276622	0.0,0.111	0.222,0.278	-0.195
ENSG00000113318.9	MSH3	chr5	+	80761545	80761678	80744505	80744615	80767932	80768120	30,71	12,0	69,88	0,0	0.00990196	0.556,1.0	1.0,1.0	-0.222
ENSG00000214827.9	MTCP1	chrX	-	155065905	155066057	155065618	155065789	155070693	155070913	22,37	0,0	13,16	4,1	0.017885	1.0,1.0	0.619,0.889	0.246
ENSG00000127989.13	MTERF1	chr7	-	91876877	91876929	91874314	91874764	91880054	91880113	8,0	5,20	0,0	14,23	0.0450871	0.481,0.0	0.0,0.0	0.24
ENSG00000163738.18	MTHFD2L	chr4	+	74160054	74160088	74158149	74158281	74174505	74174690	24,14	0,1	23,23	1,8	0.0316713	1.0,0.905	0.94,0.661	0.152
ENSG00000085760.14	MTIF2	chr2	-	55268577	55268739	55267568	55267635	55268816	55269138	97111	0,0	132156	11,8	0.000326065	1.0,1.0	0.857,0.907	0.118
ENSG00000014914.19	MTMR11	chr1	-	149933405	149933530	149932263	149932330	149934190	149934326	56114	8,1	47,62	0,0	0.0216346	0.778,0.983	1.0,1.0	-0.119
ENSG00000150712.10	MTMR12	chr5	-	32234961	32235104	32233772	32233934	32239000	32239168	69,63	0,0	50,50	2,5	0.0197195	1.0,1.0	0.926,0.833	0.121
ENSG00000139505.11	MTMR6	chr13	-	25251648	25251775	25246200	25249492	25251852	25251984	54,84	4,5	78,70	12,20	0.0367253	0.871,0.894	0.765,0.636	0.182
ENSG00000135297.15	MTO1	chr6	+	73497735	73497896	73492233	73492352	73500573	73501096	52,52	0,0	34,76	10,8	5.69714e-05	1.0,1.0	0.63,0.826	0.272
ENSG00000129422.14	MTUS1	chr8	-	17684327	17684542	17656025	17656065	17743603	17743799	7,2	3,5	4,18	0,1	0.00149013	0.538,0.167	1.0,0.9	-0.597
ENSG00000132781.17	MUTYH	chr1	-	45333412	45333564	45333284	45333324	45334390	45334511	10,11	0,0	20,18	1,5	0.00920613	1.0,1.0	0.909,0.643	0.224
ENSG00000132781.17	MUTYH	chr1	-	45333412	45333603	45333284	45333324	45334390	45334511	7,9	0,0	19,17	1,5	0.00942117	1.0,1.0	0.905,0.63	0.232
ENSG00000132781.17	MUTYH	chr1	-	45333412	45333594	45333284	45333324	45334390	45334511	7,9	0,0	23,19	1,5	0.011899	1.0,1.0	0.92,0.655	0.212
ENSG00000132781.17	MUTYH	chr1	-	45333412	45333497	45333284	45333324	45334390	45334511	7,9	0,0	24,22	1,5	0.0133772	1.0,1.0	0.923,0.688	0.195
ENSG00000132781.17	MUTYH	chr1	-	45333412	45333561	45332762	45333324	45334390	45334511	13,14	0,0	29,27	1,5	0.0154925	1.0,1.0	0.935,0.73	0.167
ENSG00000196535.14	MYO18A	chr17	-	29085603	29085648	29082315	29082438	29086437	29086577	165174	18,46	118158	81112	1.25522e-05	0.849,0.699	0.472,0.464	0.306
ENSG00000196535.14	MYO18A	chr17	-	29085603	29085641	29082315	29082438	29086437	29086577	28,36	18,46	27,47	81112	0.0235188	0.504,0.339	0.179,0.215	0.224
ENSG00000128641.18	MYO1B	chr2	+	191400748	191400835	191400381	191400468	191408114	191408189	45,66	94,89	121152	78,88	3.95809e-05	0.193,0.27	0.437,0.463	-0.218
ENSG00000128641.18	MYO1B	chr2	+	191400748	191400835	191400381	191400468	191402631	191402718	71129	54,64	213225	72,68	0.0424181	0.397,0.502	0.597,0.623	-0.16
ENSG00000196586.13	MYO6	chr6	+	75911671	75911698	75908495	75908627	75914062	75914281	10,5	10,25	2,1	16,58	0.00470619	0.422,0.127	0.084,0.012	0.226
ENSG00000066933.15	MYO9A	chr15	-	72019038	72019095	72010349	72010447	72020917	72021017	30,67	25,23	37,69	6,10	0.0329928	0.4,0.618	0.774,0.793	-0.275
ENSG00000162601.9	MYSM1	chr1	-	58681784	58682545	58676925	58677056	58685152	58685251	43,44	7,0	36,57	0,0	0.0207127	0.754,1.0	1.0,1.0	-0.123
ENSG00000156239.11	N6AMT1	chr21	-	28879869	28879953	28878191	28878333	28882159	28882250	12,22	30,14	41,35	16,8	0.0431838	0.167,0.44	0.562,0.686	-0.321
ENSG00000150456.10	N6AMT2	chr13	-	20737722	20737805	20731840	20732121	20757454	20757617	9,13	1,0	12,16	4,3	0.032715	0.818,1.0	0.6,0.727	0.246
ENSG00000008130.15	NADK	chr1	-	1756778	1756882	1756502	1756608	1757180	1757268	6,5	60,43	17,12	29,50	0.0284839	0.048,0.055	0.227,0.107	-0.116
ENSG00000008130.15	NADK	chr1	-	1756738	1756882	1756502	1756608	1757180	1757228	6,4	60,43	17,10	29,50	0.0333146	0.048,0.044	0.227,0.091	-0.113
ENSG00000187109.13	NAP1L1	chr12	-	76060137	76060270	76056032	76056161	76067370	76067473	13,15	7,0	13,7	0,0	0.0237108	0.481,1.0	1.0,1.0	-0.26
ENSG00000187109.13	NAP1L1	chr12	-	76060137	76060265	76056032	76056161	76067370	76067473	8,19	7,0	10,7	0,0	0.0354647	0.364,1.0	1.0,1.0	-0.318
ENSG00000205531.12	NAP1L4	chr11	-	2988076	2988126	2979206	2979237	2989128	2989197	3,4	17,13	0,0	12,13	0.0360627	0.094,0.153	0.0,0.0	0.123
ENSG00000132780.16	NASP	chr1	+	45600384	45600457	45594693	45594773	45602254	45602365	0,2	4,3	12,9	0,1	9.73024e-06	0.0,0.25	1.0,0.818	-0.784
ENSG00000134369.15	NAV1	chr1	+	201788467	201788638	201786428	201786577	201789739	201789798	20,31	0,1	19,5	4,3	0.00440085	1.0,0.939	0.704,0.455	0.39
ENSG00000166833.19	NAV2	chr11	+	20049835	20049901	20048727	20049195	20051288	20051333	6,6	12,5	14,22	3,6	0.0247807	0.206,0.384	0.708,0.655	-0.387
ENSG00000266338.6	NBPF15	chr1	-	144450771	144450802	144448774	144448916	144456536	144456805	17,15	15,3	4,3	16,6	0.0369306	0.442,0.778	0.149,0.259	0.406
ENSG00000188554.13	NBR1	chr17	+	43171073	43171302	43170493	43170943	43175790	43176676	20,17	7,6	13,19	14,31	0.0155989	0.588,0.586	0.317,0.235	0.311
ENSG00000104490.17	NCALD	chr8	-	101745830	101745993	101719620	101719648	101790861	101790947	8,0	9,15	2,0	31,44	0.0408652	0.308,0.0	0.031,0.0	0.139
ENSG00000084676.15	NCOA1	chr2	+	24584475	24584560	24564309	24564430	24643965	24644122	51,62	0,0	33,50	3,4	0.0135401	1.0,1.0	0.846,0.862	0.146
ENSG00000111912.19	NCOA7	chr6	+	125855019	125855240	125815290	125815404	125874888	125874968	48,55	7,3	85,87	1,1	0.0124633	0.774,0.902	0.977,0.978	-0.139
ENSG00000196498.13	NCOR2	chr12	-	124340601	124340751	124340293	124340443	124341822	124342074	46124	1,2	125,98	20,8	0.0016183	0.958,0.969	0.758,0.86	0.155
ENSG00000196498.13	NCOR2	chr12	-	124340601	124340694	124340293	124340443	124341822	124342055	35,72	1,2	74,66	20,8	0.00333919	0.946,0.947	0.649,0.805	0.219
ENSG00000196498.13	NCOR2	chr12	-	124457105	124457162	124449814	124449867	124466172	124466286	40,48	0,1	46,64	8,4	0.0082254	1.0,0.964	0.762,0.899	0.151
ENSG00000196498.13	NCOR2	chr12	-	124429612	124429706	124426621	124426800	124430614	124430787	38,39	10,0	51,43	0,0	0.0083057	0.655,1.0	1.0,1.0	-0.172
ENSG00000196498.13	NCOR2	chr12	-	124429612	124429703	124426621	124426800	124430614	124430781	14,19	10,0	28,21	0,0	0.0195712	0.412,1.0	1.0,1.0	-0.294
ENSG00000166579.15	NDEL1	chr17	+	8443926	8444176	8435921	8436045	8444259	8444357	0,0	3,23	2,7	10,20	0.0121252	0.0,0.0	0.091,0.149	-0.12
ENSG00000114904.12	NEK4	chr3	-	52749691	52749829	52746733	52746904	52751931	52752336	64,40	22,13	29,37	24,36	0.0129474	0.593,0.606	0.377,0.339	0.241
ENSG00000165525.17	NEMF	chr14	-	49820342	49820456	49814753	49814857	49825866	49825955	27,5	50,23	8,7	96,75	0.00166298	0.213,0.098	0.04,0.045	0.113
ENSG00000162139.9	NEU3	chr11	+	74994508	74994720	74988942	74989154	75005412	75010907	9,14	0,0	11,25	7,2	0.00249308	1.0,1.0	0.44,0.862	0.349
ENSG00000215041.9	NEURL4	chr17	-	7327164	7327230	7326710	7327009	7327439	7327884	51,41	12,6	65,60	2,2	0.0069729	0.688,0.78	0.944,0.94	-0.208
ENSG00000072736.18	NFATC3	chr16	+	68126447	68126610	68085445	68085784	68157868	68158068	47,34	0,0	45,42	4,2	0.0454275	1.0,1.0	0.849,0.913	0.119
ENSG00000001167.14	NFYA	chr6	+	41080813	41080897	41079028	41079164	41084045	41084192	28,13	14,12	5,4	23,25	0.000164873	0.5,0.351	0.098,0.074	0.34
ENSG00000001167.14	NFYA	chr6	+	41080810	41080897	41079028	41079164	41084045	41084192	29,15	14,12	9,9	23,25	0.00526937	0.509,0.385	0.164,0.153	0.288
ENSG00000100503.23	NIN	chr14	-	50756491	50758630	50754741	50754867	50759856	50760359	84,58	0,0	64,62	4,4	0.0155031	1.0,1.0	0.889,0.886	0.113
ENSG00000168256.17	NKIRAS2	chr17	+	42022564	42022640	42022379	42022472	42023653	42024265	109,80	2,2	70,81	10,10	0.00333919	0.965,0.952	0.778,0.802	0.168
ENSG00000168256.17	NKIRAS2	chr17	+	42022569	42022640	42022379	42022472	42023653	42024265	93,73	2,2	59,75	10,10	0.00368674	0.959,0.948	0.747,0.789	0.185
ENSG00000172113.8	NME6	chr3	-	48296118	48296158	48295074	48295235	48296726	48296829	52,34	0,4	44,18	7,13	0.0199466	1.0,0.845	0.801,0.471	0.286
ENSG00000197183.12	NOL4L	chr20	-	32451496	32451573	32443060	32447816	32452235	32452437	0,4	20,33	12,6	20,37	0.0499059	0.0,0.057	0.231,0.075	-0.124
ENSG00000198000.11	NOL8	chr9	-	92319942	92320379	92319220	92319356	92321667	92321746	21,3	16,62	3,5	86,89	0.0269894	0.396,0.024	0.017,0.027	0.188
ENSG00000169418.9	NPR1	chr1	+	153686122	153686200	153685805	153685880	153686645	153686750	16,9	0,0	6,9	3,1	0.0369306	1.0,1.0	0.5,0.818	0.341
ENSG00000025434.18	NR1H3	chr11	+	47259179	47259259	47257997	47258129	47259790	47259979	30,38	0,1	24,30	2,6	0.0116884	1.0,0.95	0.857,0.714	0.19
ENSG00000025434.18	NR1H3	chr11	+	47259100	47259259	47257970	47258129	47259790	47259979	17,29	0,1	19,24	2,6	0.0134051	1.0,0.935	0.826,0.667	0.221
ENSG00000091129.19	NRCAM	chr7	-	108168276	108168402	108160360	108160492	108177989	108178112	0,0	5,9	6,2	4,6	0.00392138	0.0,0.0	0.429,0.143	-0.286
ENSG00000091129.19	NRCAM	chr7	-	108225644	108225701	108223724	108223836	108226207	108226378	250201	160140	282337	324387	0.00444938	0.465,0.444	0.326,0.326	0.129
ENSG00000180530.9	NRIP1	chr21	-	15015144	15015225	15014343	15014466	15043494	15043574	57,36	84,59	25,40	115140	0.00144908	0.253,0.234	0.098,0.125	0.132
ENSG00000180530.9	NRIP1	chr21	-	15014343	15014374	14961234	14968526	15043494	15043570	31,38	39,60	22,19	51,88	0.0356029	0.357,0.307	0.232,0.131	0.15
ENSG00000157045.8	NTAN1	chr16	-	15047996	15048099	15047441	15047550	15055890	15056064	27,19	0,0	7,12	5,3	9.87181e-05	1.0,1.0	0.412,0.667	0.461
ENSG00000151413.16	NUBPL	chr14	+	31730652	31730761	31673483	31673574	31826628	31826714	0,1	8,2	2,3	2,3	0.0482914	0.0,0.2	0.333,0.333	-0.233
ENSG00000143228.12	NUF2	chr1	+	163322866	163323095	163321889	163322066	163326031	163326174	0,0	14,18	7,3	19,32	0.0202522	0.0,0.0	0.156,0.045	-0.101
ENSG00000137497.17	NUMA1	chr11	-	72012400	72012433	72010785	72010854	72012894	72012926	25,23	115,71	9,6	93,93	0.0055881	0.13,0.182	0.062,0.042	0.104
ENSG00000138750.14	NUP54	chr4	-	76124648	76124754	76117663	76118194	76130655	76130749	35,52	0,0	85,59	5,8	0.00244182	1.0,1.0	0.895,0.787	0.159
ENSG00000143748.17	NVL	chr1	-	224232088	224232182	224231225	224231296	224233200	224233289	5,3	13,32	0,0	28,30	0.0336852	0.161,0.045	0.0,0.0	0.103
ENSG00000104904.12	OAZ1	chr19	+	2271390	2271474	2269533	2269744	2271781	2272262	2,2	12,9	11,3	2,4	0.0428568	0.077,0.1	0.733,0.273	-0.414
ENSG00000154358.19	OBSCN	chr1	+	228224458	228224734	228217012	228217288	228243182	228243458	0,23	9,3	2,5	0,0	0.00035643	0.0,0.793	1.0,1.0	-0.603
ENSG00000099330.8	OCEL1	chr19	+	17228802	17228915	17228253	17228309	17229008	17229215	0,14	6,3	5,21	0,0	0.000111538	0.0,0.7	1.0,1.0	-0.65
ENSG00000099330.8	OCEL1	chr19	+	17228802	17228848	17228255	17228309	17229008	17229215	0,12	6,3	6,15	0,0	0.000170309	0.0,0.709	1.0,1.0	-0.645
ENSG00000197822.10	OCLN	chr5	+	69551543	69551585	69547929	69548101	69553569	69558104	26,86	6,1	50,55	0,0	0.0342454	0.732,0.982	1.0,1.0	-0.143
ENSG00000122417.15	ODF2L	chr1	-	86356443	86356602	86354773	86354859	86358786	86358891	20,16	0,0	7,11	1,4	0.00573191	1.0,1.0	0.778,0.579	0.322
ENSG00000138430.15	OLA1	chr2	-	174246739	174246815	174229307	174229451	174248451	174248475	54,64	2,12	58,68	0,1	0.00270987	0.931,0.727	1.0,0.971	-0.157
ENSG00000162600.11	OMA1	chr1	-	58506059	58506209	58480718	58481174	58527260	58527335	51,45	0,0	40,66	6,5	0.00167669	1.0,1.0	0.769,0.868	0.181
ENSG00000198836.8	OPA1	chr3	+	193617783	193617837	193615673	193615770	193618868	193618936	7,13	16,11	42,42	17,16	0.0491712	0.199,0.402	0.584,0.599	-0.291
ENSG00000178814.15	OPLAH	chr8	-	144057447	144057713	144057207	144057320	144057855	144057923	44,68	8,0	19,29	0,0	0.0321067	0.733,1.0	1.0,1.0	-0.133
ENSG00000135506.15	OS9	chr12	+	57720098	57720263	57718992	57719182	57720405	57720518	459626	267269	514622	137178	0.00180563	0.462,0.538	0.652,0.636	-0.144
ENSG00000141447.16	OSBPL1A	chr18	-	24178161	24178195	24172375	24172483	24179737	24179835	12,23	0,0	9,14	4,2	0.00314552	1.0,1.0	0.605,0.826	0.284
ENSG00000141447.16	OSBPL1A	chr18	-	24341546	24341658	24334244	24334330	24366891	24366966	3,18	0,0	21,16	3,2	0.0376704	1.0,1.0	0.778,0.8	0.211
ENSG00000116885.18	OSCP1	chr1	-	36444003	36444033	36438755	36438910	36450257	36450433	8,0	19,23	0,0	17,23	0.0243581	0.229,0.0	0.0,0.0	0.115
ENSG00000135124.14	P2RX4	chr12	+	121217133	121217281	121210128	121210298	121221912	121221984	74,93	0,0	35,61	1,6	0.015243	1.0,1.0	0.946,0.836	0.109
ENSG00000117385.15	P3H1	chr1	-	42762322	42762346	42759256	42759390	42766506	42767002	11,17	0,0	1,6	3,2	0.00199141	1.0,1.0	0.201,0.693	0.553
ENSG00000101104.12	PABPC1L	chr20	+	44936893	44936976	44936636	44936730	44938060	44938191	0,0	12,7	7,0	6,9	0.0347336	0.0,0.0	0.368,0.0	-0.184
ENSG00000163138.18	PACRGL	chr4	+	20702140	20702221	20700458	20700747	20704465	20704533	0,4	7,6	5,15	1,5	0.00866592	0.0,0.25	0.714,0.6	-0.532
ENSG00000163138.18	PACRGL	chr4	+	20718815	20718976	20713431	20713539	20724807	20724879	9,0	18,10	0,0	7,9	0.0239978	0.2,0.0	0.0,0.0	0.1
ENSG00000163138.18	PACRGL	chr4	+	20709682	20709773	20707802	20707870	20712787	20712922	16,37	2,0	41,34	6,8	0.0409762	0.8,1.0	0.774,0.68	0.173
ENSG00000165912.15	PACSIN3	chr11	-	47182673	47182809	47182402	47182559	47183003	47183069	63,33	0,1	21,31	2,7	0.00267246	1.0,0.943	0.84,0.689	0.207
ENSG00000165912.15	PACSIN3	chr11	-	47182673	47182764	47182402	47182559	47183003	47183069	111,70	0,1	59,69	2,7	0.0116165	1.0,0.972	0.937,0.831	0.102
ENSG00000152782.16	PANK1	chr10	-	89593812	89593989	89593196	89593320	89599251	89599505	35,44	0,0	50,50	7,2	0.00697628	1.0,1.0	0.781,0.926	0.146
ENSG00000090060.17	PAPOLA	chr14	+	96560648	96560711	96556174	96556413	96562818	96562893	295382	7,11	295368	48,77	8.38345e-13	0.957,0.948	0.765,0.717	0.211
ENSG00000137819.13	PAQR5	chr15	+	69359965	69360131	69337340	69337501	69379882	69380010	444236	40,36	171206	31,51	0.0462362	0.847,0.766	0.734,0.669	0.105
ENSG00000160781.15	PAQR6	chr1	-	156244760	156244911	156243421	156244403	156246122	156246250	34,51	7,4	8,22	0,0	0.00583135	0.708,0.864	1.0,1.0	-0.214
ENSG00000160781.15	PAQR6	chr1	-	156245141	156245238	156244760	156244911	156245534	156245661	24,33	3,5	18,25	0,1	0.0305204	0.8,0.767	1.0,0.926	-0.179
ENSG00000148498.15	PARD3	chr10	-	34372497	34372529	34360070	34360259	34374873	34375002	109141	153287	76143	256400	0.0144574	0.331,0.254	0.171,0.199	0.107
ENSG00000111224.13	PARP11	chr12	-	3863835	3863957	3829889	3830018	3873211	3873442	24,19	1,0	18,17	2,4	0.0284839	0.923,1.0	0.818,0.68	0.213
ENSG00000059378.12	PARP12	chr7	-	140037714	140037856	140034234	140034331	140041643	140041839	17,28	0,0	16,26	1,4	0.0374706	1.0,1.0	0.889,0.765	0.173
ENSG00000137817.16	PARP6	chr15	-	72250844	72250957	72250019	72250092	72251206	72251255	46101	121,96	102,98	56,52	0.00564161	0.16,0.345	0.477,0.485	-0.228
ENSG00000137817.16	PARP6	chr15	-	72250844	72250954	72250019	72250092	72251206	72251255	59134	121,96	104121	56,52	0.0415687	0.196,0.411	0.481,0.538	-0.206
ENSG00000100105.17	PATZ1	chr22	-	31328786	31328924	31325803	31327309	31335691	31335863	16,32	11,20	6,15	23,30	0.00508322	0.421,0.444	0.115,0.2	0.275
ENSG00000185630.18	PBX1	chr1	+	164820071	164820184	164811989	164812149	164821536	164821626	45108	95126	145164	103139	0.0225577	0.191,0.3	0.413,0.371	-0.147
ENSG00000090097.20	PCBP4	chr3	-	51961940	51962088	51961159	51961304	51962809	51962892	0,4	9,11	6,1	0,1	0.0071173	0.0,0.154	1.0,0.333	-0.59
ENSG00000115289.12	PCGF1	chr2	-	74505951	74506057	74505736	74505770	74506731	74506884	50,20	5,3	58,48	0,0	0.0036027	0.833,0.769	1.0,1.0	-0.199
ENSG00000156374.14	PCGF6	chr10	-	103333924	103333952	103326533	103326632	103345023	103345132	15,13	0,9	27,19	0,0	0.0152499	1.0,0.51	1.0,1.0	-0.245
ENSG00000100889.11	PCK2	chr14	+	24103159	24103255	24102752	24102890	24103509	24104124	117141	0,1	135106	6,11	0.000521797	1.0,0.986	0.918,0.828	0.12
ENSG00000078674.17	PCM1	chr8	+	17980590	17980755	17972328	17972687	17985446	17985619	169229	37,55	227197	93,86	0.018584	0.695,0.676	0.55,0.534	0.143
ENSG00000081154.11	PCNP	chr3	+	101585439	101585511	101579789	101580004	101592626	101592776	17,11	0,0	17,16	0,5	0.0462517	1.0,1.0	1.0,0.615	0.193
ENSG00000160299.16	PCNT	chr21	+	46425830	46425971	46421969	46422124	46427621	46427795	25,26	0,0	40,43	2,5	0.0164446	1.0,1.0	0.909,0.811	0.14
ENSG00000160613.12	PCSK7	chr11	-	117208896	117209046	117207969	117208064	117218465	117218568	15,15	0,6	20,32	0,0	0.0227972	1.0,0.556	1.0,1.0	-0.222
ENSG00000205268.10	PDE7A	chr8	-	65788881	65788978	65782782	65782843	65841370	65841467	0,0	15,9	2,4	3,9	0.0157146	0.0,0.0	0.25,0.182	-0.216
ENSG00000113231.13	PDE8B	chr5	+	77425766	77425896	77421820	77421988	77426444	77427418	144141	0,0	62,85	5,12	3.22613e-06	1.0,1.0	0.861,0.78	0.179
ENSG00000145431.10	PDGFC	chr4	-	156767772	156767876	156762802	156763206	156767961	156767990	19,55	7,7	33,35	0,1	0.00174491	0.576,0.797	1.0,0.946	-0.286
ENSG00000160209.18	PDXK	chr21	+	43743668	43743802	43741666	43741771	43746078	43746125	5,5	4,6	7,5	0,1	0.00462644	0.385,0.294	1.0,0.714	-0.517
ENSG00000173517.10	PEAK1	chr15	-	77361314	77361431	77286422	77286504	77365162	77365225	0,2	6,8	8,11	5,5	0.00144908	0.0,0.111	0.444,0.524	-0.428
ENSG00000173517.10	PEAK1	chr15	-	77361314	77361435	77286422	77286504	77365162	77365225	0,2	6,8	3,7	5,5	0.0393387	0.0,0.111	0.231,0.412	-0.266
ENSG00000174516.14	PELI3	chr11	+	66468832	66468904	66468127	66468280	66471241	66471371	40,30	5,6	27,27	0,1	0.00797325	0.8,0.714	1.0,0.931	-0.209
ENSG00000049246.14	PER3	chr1	+	7787197	7787246	7786720	7786836	7788044	7788338	3,5	6,5	0,0	2,4	0.00393111	0.229,0.372	0.0,0.0	0.3
ENSG00000164751.14	PEX2	chr8	-	76988306	76988338	76986186	76986296	76999989	77000226	118193	2,3	101144	13,10	0.00206806	0.976,0.978	0.843,0.909	0.101
ENSG00000141959.16	PFKL	chr21	+	44305187	44305417	44304274	44304455	44306680	44306754	9,13	0,6	2,1	0,0	0.0243581	1.0,0.52	1.0,1.0	-0.24
ENSG00000148985.19	PGAP2	chr11	+	3811249	3811424	3808293	3808315	3823882	3824135	13,9	0,0	9,18	0,5	0.0360015	1.0,1.0	1.0,0.643	0.178
ENSG00000112419.14	PHACTR2	chr6	+	143760400	143760640	143753753	143753912	143765260	143765798	16,5	22,21	6,4	35,57	0.0289789	0.267,0.106	0.079,0.034	0.13
ENSG00000106443.15	PHF14	chr7	+	11062670	11062775	11061963	11062085	11102485	11103655	0,0	10,9	8,2	18,31	0.0318523	0.0,0.0	0.182,0.031	-0.106
ENSG00000156531.16	PHF6	chrX	+	134378004	134378106	134377571	134377755	134393500	134393634	57,55	7,2	106113	2,0	0.015167	0.803,0.932	0.964,1.0	-0.114
ENSG00000044446.11	PHKA2	chrX	-	18902791	18902910	18901484	18901603	18905757	18905815	19,5	21,65	2,3	23,69	0.026734	0.311,0.037	0.042,0.021	0.142
ENSG00000175309.14	PHYKPL	chr5	-	178215275	178215430	178214795	178214885	178222354	178222580	36,46	0,1	10,27	2,5	0.00623519	1.0,0.958	0.714,0.73	0.257
ENSG00000143393.16	PI4KB	chr1	-	151326171	151326373	151324744	151324917	151327270	151327657	23,27	0,1	16,19	9,2	0.0041732	1.0,0.931	0.471,0.826	0.317
ENSG00000143393.16	PI4KB	chr1	-	151310210	151310255	151307573	151307801	151315572	151316509	11,11	85,48	24,23	42,64	0.0256581	0.074,0.123	0.26,0.181	-0.122
ENSG00000151665.12	PIGF	chr2	-	46588074	46588126	46581284	46581591	46591802	46591925	12,17	0,0	5,8	10,19	2.79483e-10	1.0,1.0	0.224,0.196	0.79
ENSG00000115020.16	PIKFYVE	chr2	+	208276711	208276830	208273583	208273733	208285725	208285933	18,24	0,2	13,26	4,11	0.00619696	1.0,0.857	0.619,0.542	0.348
ENSG00000121716.18	PILRB	chr7	+	100353209	100353270	100352996	100353123	100355142	100355240	60127	11,9	134142	1,6	0.0184651	0.746,0.884	0.986,0.927	-0.142
ENSG00000121716.18	PILRB	chr7	+	100353372	100354012	100352563	100353123	100355142	100358015	17,36	11,9	49,50	1,6	0.0207379	0.436,0.667	0.961,0.806	-0.332
ENSG00000143398.19	PIP5K1A	chr1	+	151242179	151242269	151239954	151240039	151242437	151242567	26,49	0,0	27,52	9,5	0.000323633	1.0,1.0	0.6,0.839	0.28
ENSG00000135549.14	PKIB	chr6	+	122675077	122675144	122633282	122633367	122717786	122717963	20,11	0,0	18,34	3,3	0.0198928	1.0,1.0	0.755,0.854	0.196
ENSG00000176485.10	PLA2G16	chr11	-	63598060	63598113	63590099	63590368	63613999	63614158	80102	11,2	98140	0,2	0.00864129	0.807,0.967	1.0,0.976	-0.101
ENSG00000118495.18	PLAGL1	chr6	-	143947984	143948460	143940745	143942663	143960468	143960542	13,48	5,7	15,19	0,0	0.0013121	0.565,0.774	1.0,1.0	-0.331
ENSG00000101333.16	PLCB4	chr20	+	9476716	9476753	9473278	9473365	9478920	9481242	32,48	1,0	22,34	6,6	0.000816002	0.955,1.0	0.708,0.789	0.229
ENSG00000107679.14	PLEKHA1	chr10	+	122428275	122428420	122426941	122427031	122429623	122432354	43,55	47,90	11,17	38,69	0.00543147	0.314,0.234	0.126,0.11	0.156
ENSG00000107679.14	PLEKHA1	chr10	+	122428275	122428333	122426941	122427031	122429623	122432345	44,41	47,90	6,15	38,69	0.00549908	0.34,0.201	0.08,0.107	0.177
ENSG00000107679.14	PLEKHA1	chr10	+	122428275	122428346	122426941	122427031	122429623	122432345	43,59	47,90	11,23	38,69	0.016596	0.314,0.247	0.126,0.143	0.146
ENSG00000107679.14	PLEKHA1	chr10	+	122428275	122428316	122426941	122427031	122429623	122432345	149121	47,90	39,43	38,69	0.0486607	0.669,0.461	0.395,0.284	0.226
ENSG00000143850.12	PLEKHA6	chr1	-	204256801	204256888	204250545	204250614	204257352	204257869	12,27	19,44	9,11	37,56	0.0294091	0.24,0.235	0.108,0.089	0.139
ENSG00000143850.12	PLEKHA6	chr1	-	204223461	204223585	204221220	204222779	204228082	204228228	50,70	7,4	44,76	0,2	0.0398667	0.781,0.897	1.0,0.95	-0.136
ENSG00000134297.6	PLEKHA8P1	chr12	-	45190793	45190961	45176243	45176433	45215939	45216041	48,35	8,3	6,9	0,0	0.0101162	0.75,0.854	1.0,1.0	-0.198
ENSG00000115762.16	PLEKHB2	chr2	+	131130720	131130760	131126683	131126786	131140166	131140275	34,53	4,12	55,72	0,2	0.000708906	0.845,0.739	1.0,0.959	-0.188
ENSG00000152527.13	PLEKHH2	chr2	+	43725747	43725821	43720668	43720749	43726271	43726451	0,0	15,14	8,4	21,21	0.0051348	0.0,0.0	0.16,0.087	-0.123
ENSG00000152527.13	PLEKHH2	chr2	+	43757118	43757264	43753618	43753760	43758899	43759029	35,42	5,3	59,73	0,2	0.0387808	0.778,0.875	1.0,0.948	-0.147
ENSG00000068137.14	PLEKHH3	chr17	-	42674740	42674875	42674353	42674409	42676401	42676992	0,3	17,30	6,4	8,15	0.0363318	0.0,0.048	0.273,0.118	-0.172
ENSG00000225190.8	PLEKHM1	chr17	-	45468208	45468593	45458168	45458439	45475099	45475726	35,25	3,2	11,18	15,7	0.00494189	0.854,0.862	0.268,0.563	0.443
ENSG00000173846.12	PLK3	chr1	+	44804649	44804779	44804338	44804501	44805265	44805379	35,47	0,0	18,30	3,3	0.0122755	1.0,1.0	0.75,0.833	0.209
ENSG00000142731.10	PLK4	chr4	+	127891578	127891681	127891091	127891196	127892364	127892514	33,33	0,0	58,48	0,7	0.0333436	1.0,1.0	1.0,0.774	0.113
ENSG00000152952.11	PLOD2	chr3	-	146162869	146162956	146124137	146124229	146163593	146163653	1,24	0,3	0,0	1,1	6.68263e-05	1.0,0.8	0.0,0.0	0.9
ENSG00000067113.16	PLPP1	chr5	-	55490961	55491114	55467868	55468149	55534571	55534951	1,2	48,6	3,8	9,13	0.0136478	0.01,0.143	0.143,0.235	-0.113
ENSG00000100417.11	PMM1	chr22	-	41586075	41586193	41584526	41584603	41589718	41589825	34,59	0,0	36,44	5,2	0.00980138	1.0,1.0	0.783,0.917	0.15
ENSG00000152359.14	POC5	chr5	-	75677773	75677950	75674201	75674578	75685206	75685484	26,15	0,0	27,49	4,2	0.0317664	1.0,1.0	0.771,0.925	0.152
ENSG00000100227.17	POLDIP3	chr22	-	42601969	42602107	42599697	42599793	42602769	42603160	45,60	0,0	68,57	8,6	0.000459756	1.0,1.0	0.81,0.826	0.182
ENSG00000100227.17	POLDIP3	chr22	-	42601969	42602056	42599697	42599793	42602769	42603012	72128	0,0	109125	8,6	0.00149377	1.0,1.0	0.872,0.912	0.108
ENSG00000130997.16	POLN	chr4	-	2179307	2179465	2174690	2174751	2193203	2193316	19,11	8,0	8,4	0,0	0.0156427	0.543,1.0	1.0,1.0	-0.228
ENSG00000005075.15	POLR2J	chr7	-	102476180	102476270	102474392	102474535	102478807	102478907	3,7	2,4	10,15	0,1	0.00363142	0.429,0.467	1.0,0.882	-0.493
ENSG00000085998.13	POMGNT1	chr1	-	46189179	46189357	46188683	46188980	46189457	46189567	70,78	7,2	42,68	13,13	0.020108	0.833,0.951	0.618,0.723	0.221
ENSG00000130714.15	POMT1	chr9	+	131504188	131504340	131502924	131503073	131506113	131506220	74111	1,6	36,73	8,8	0.0468775	0.974,0.902	0.692,0.82	0.182
ENSG00000009830.11	POMT2	chr14	-	77302834	77302943	77299523	77299561	77304691	77304800	83,78	11,0	57125	0,0	0.00603618	0.79,1.0	1.0,1.0	-0.105
ENSG00000138621.11	PPCDC	chr15	+	75043440	75043536	75028246	75028453	75048552	75048721	21,24	0,0	38,22	2,4	0.0169345	1.0,1.0	0.905,0.733	0.181
ENSG00000196262.13	PPIA	chr7	+	44799701	44799880	44799246	44799277	44801286	44801631	8,2	0,0	13,14	6,4	0.00074528	1.0,1.0	0.52,0.636	0.422
ENSG00000240344.8	PPIL3	chr2	-	200882341	200882435	200881420	200881488	200885697	200885772	133119	16,22	167171	6,13	0.0261803	0.806,0.73	0.933,0.868	-0.133
ENSG00000240344.8	PPIL3	chr2	-	200882341	200882382	200881420	200881488	200885697	200885788	70,48	16,22	90,88	6,13	0.0345525	0.736,0.581	0.905,0.812	-0.2
ENSG00000185250.15	PPIL6	chr6	-	109436103	109436199	109431156	109431345	109440455	109441171	12,9	0,0	18,15	4,2	0.00642002	1.0,1.0	0.692,0.789	0.26
ENSG00000145725.19	PPIP5K2	chr5	+	103133452	103133648	103120263	103120488	103136731	103136822	63,86	0,5	98,73	10,11	0.0465247	1.0,0.896	0.831,0.768	0.148
ENSG00000143224.17	PPOX	chr1	+	161167370	161167486	161167099	161167234	161168431	161168576	12,19	0,0	12,10	7,0	0.0205583	1.0,1.0	0.462,1.0	0.269
ENSG00000100239.15	PPP6R2	chr22	+	50389033	50389111	50372019	50372150	50391866	50392015	4,5	11,2	11,11	1,0	0.000627397	0.154,0.556	0.846,1.0	-0.568
ENSG00000100239.15	PPP6R2	chr22	+	50388985	50389111	50372071	50372150	50391866	50392015	22,9	11,2	10,17	1,0	0.0041769	0.5,0.692	0.833,1.0	-0.321
ENSG00000019485.12	PRDM11	chr11	+	45224216	45224843	45219569	45219757	45225994	45235124	0,4	4,12	4,6	1,0	0.000170281	0.0,0.143	0.667,1.0	-0.762
ENSG00000138738.10	PRDM5	chr4	-	120816831	120816924	120816452	120816574	120818352	120818527	15,10	0,11	5,0	7,11	0.0463308	1.0,0.313	0.263,0.0	0.525
ENSG00000138073.13	PREB	chr2	-	27132229	27132356	27131671	27132082	27132602	27132727	140,87	0,1	74130	5,11	0.000539317	1.0,0.978	0.881,0.855	0.121
ENSG00000138078.15	PREPL	chr2	-	44359496	44359750	44346267	44346390	44361379	44361806	62,51	4,9	60,75	19,28	0.0366135	0.886,0.739	0.612,0.573	0.22
ENSG00000138078.15	PREPL	chr2	-	44359496	44359596	44346267	44346390	44361379	44361546	60,46	4,9	58,68	19,28	0.0440692	0.882,0.719	0.604,0.548	0.224
ENSG00000138078.15	PREPL	chr2	-	44359496	44360038	44346267	44346390	44361379	44361494	68,47	4,9	66,70	19,28	0.0499059	0.895,0.723	0.635,0.556	0.213
ENSG00000164306.10	PRIMPOL	chr4	+	184685411	184685498	184672172	184672460	184685575	184685684	21,18	13,0	34,22	1,0	0.0325532	0.447,1.0	0.944,1.0	-0.248
ENSG00000131791.7	PRKAB2	chr1	-	147160796	147160833	147159218	147159642	147161711	147161780	6,6	11,14	1,1	27,16	0.00516494	0.265,0.221	0.024,0.04	0.211
ENSG00000253729.7	PRKDC	chr8	-	47782161	47782254	47779003	47779093	47782377	47782591	201323	25,29	356442	17,6	0.000185836	0.801,0.848	0.913,0.974	-0.119
ENSG00000183943.5	PRKX	chrX	-	3641851	3641971	3626418	3626514	3655148	3655412	44,42	0,2	46,62	6,6	0.0445018	1.0,0.913	0.793,0.838	0.141
ENSG00000184500.14	PROS1	chr3	-	93928701	93928797	93927249	93927407	93973673	93973862	11,7	27,28	12,22	14,9	0.0312046	0.169,0.111	0.3,0.55	-0.285
ENSG00000165630.13	PRPF18	chr10	+	13591767	13591888	13586938	13587152	13597457	13597535	0,4	29,40	18,10	44,53	0.00948111	0.0,0.048	0.17,0.086	-0.104
ENSG00000185246.17	PRPF39	chr14	+	45109893	45109993	45109615	45109780	45110093	45110220	13,30	6,25	19,17	40,44	0.0216346	0.52,0.375	0.192,0.162	0.271
ENSG00000110844.13	PRPF40B	chr12	+	49635098	49635263	49634537	49634602	49635364	49635473	27,25	7,2	59,55	0,0	0.000522993	0.659,0.862	1.0,1.0	-0.24
ENSG00000110844.13	PRPF40B	chr12	+	49633013	49633124	49632854	49632880	49633426	49633547	23,33	0,1	48,41	5,6	0.0133912	1.0,0.943	0.828,0.774	0.171
ENSG00000141127.14	PRPSAP2	chr17	+	18865468	18865564	18857783	18857853	18865801	18865952	28,74	7,0	62,77	0,0	0.0281619	0.667,1.0	1.0,1.0	-0.166
ENSG00000125637.15	PSD4	chr2	+	113198739	113198884	113197194	113197913	113199082	113199226	0,3	17,0	6,3	0,0	0.00574479	0.0,1.0	1.0,1.0	-0.5
ENSG00000257621.7	PSMA3-AS1	chr14	-	58293065	58293138	58291634	58291707	58297954	58298084	3,14	64,61	21,18	36,55	0.0157146	0.023,0.103	0.226,0.141	-0.12
ENSG00000146733.13	PSPH	chr7	-	56032216	56032296	56031928	56032054	56033380	56033494	0,0	8,4	1,5	12,7	0.0439534	0.0,0.0	0.04,0.263	-0.151
ENSG00000179988.13	PSTK	chr10	+	122987333	122987504	122986868	122986962	122990173	122990407	0,1	9,15	3,9	7,5	0.00174619	0.0,0.032	0.176,0.474	-0.309
ENSG00000117569.18	PTBP2	chr1	+	96806418	96806452	96804784	96804939	96806865	96806958	7,10	20,18	27,19	9,10	0.00198412	0.192,0.274	0.671,0.564	-0.384
ENSG00000169398.19	PTK2	chr8	-	140669726	140669735	140668268	140668424	140674297	140674404	17,53	136198	64,84	66120	3.20987e-07	0.101,0.194	0.465,0.386	-0.278
ENSG00000070159.13	PTPN3	chr9	-	109457172	109457215	109448810	109448855	109457291	109457399	32,16	0,0	21,31	2,4	0.0311045	1.0,1.0	0.868,0.829	0.151
ENSG00000249859.7	PVT1	chr8	+	128095691	128095817	128010317	128010444	128096517	128096656	0,0	29,2	6,0	7,8	0.0468775	0.0,0.0	0.3,0.0	-0.15
ENSG00000170234.12	PWWP2A	chr5	-	160080650	160080770	160077843	160078168	160093100	160094065	18,17	0,0	10,21	10,11	2.02107e-06	1.0,1.0	0.333,0.488	0.59
ENSG00000130508.10	PXDN	chr2	-	1687632	1687703	1684079	1684151	1691927	1691999	5,13	13,13	10,7	0,2	0.00808024	0.161,0.333	1.0,0.636	-0.571
ENSG00000130508.10	PXDN	chr2	-	1687631	1687703	1684079	1684151	1691927	1691999	32,58	13,13	22,20	0,2	0.0118301	0.552,0.69	1.0,0.833	-0.295
ENSG00000176894.9	PXMP2	chr12	+	132695883	132696046	132690262	132690376	132701249	132701369	73115	13,3	75,86	0,0	0.000820548	0.737,0.95	1.0,1.0	-0.157
ENSG00000121350.15	PYROXD1	chr12	+	21449562	21449691	21445346	21445466	21452080	21452154	27,30	0,0	41,34	6,0	0.0376704	1.0,1.0	0.774,1.0	0.113
ENSG00000069974.15	RAB27A	chr15	-	55259920	55260023	55234840	55234956	55270164	55270256	9,0	5,5	0,0	6,7	0.0243581	0.474,0.0	0.0,0.0	0.237
ENSG00000141542.10	RAB40B	chr17	-	82662625	82662743	82660986	82661047	82664495	82664556	7,4	17,22	0,0	21,23	0.00314502	0.171,0.083	0.0,0.0	0.127
ENSG00000123595.6	RAB9A	chrX	+	13703734	13703902	13689120	13689288	13708720	13710506	108,54	40,28	42,65	9,6	0.0290088	0.574,0.491	0.7,0.844	-0.24
ENSG00000136933.16	RABEPK	chr9	+	125220538	125220700	125207563	125207721	125227909	125228059	23,16	2,0	21,35	7,9	0.0211387	0.852,1.0	0.6,0.66	0.296
ENSG00000111247.14	RAD51AP1	chr12	+	4546308	4546418	4543762	4543904	4548091	4548178	123132	0,0	221244	18,11	5.95691e-05	1.0,1.0	0.86,0.917	0.111
ENSG00000197275.12	RAD54B	chr8	-	94432610	94432656	94418655	94418783	94458267	94458436	17,11	0,0	21,11	2,4	0.00634453	1.0,1.0	0.865,0.626	0.254
ENSG00000197275.12	RAD54B	chr8	-	94418655	94418783	94411120	94411315	94458267	94458436	13,22	6,26	15,11	43,40	0.0353729	0.52,0.297	0.149,0.121	0.273
ENSG00000039560.13	RAI14	chr5	+	34813573	34813660	34812179	34812208	34814582	34814669	183306	102,86	273209	22,23	1.43867e-05	0.473,0.64	0.861,0.82	-0.284
ENSG00000204764.12	RANBP17	chr5	+	170914166	170914240	170910968	170911134	170918712	170918859	28,20	6,0	27,39	0,0	0.0213519	0.7,1.0	1.0,1.0	-0.15
ENSG00000031823.14	RANBP3	chr19	-	5950716	5950872	5941798	5941835	5951392	5951596	0,1	6,7	6,1	8,4	0.0352561	0.0,0.067	0.273,0.111	-0.159
ENSG00000127314.17	RAP1B	chr12	+	68651998	68652051	68650399	68650468	68654111	68654232	12,41	0,0	12,20	0,5	0.0485868	1.0,1.0	1.0,0.697	0.151
ENSG00000109756.8	RAPGEF2	chr4	+	159344035	159344059	159343280	159343404	159345105	159345329	12,20	31,69	20,29	26,30	0.0208924	0.226,0.179	0.367,0.421	-0.192
ENSG00000162521.18	RBBP4	chr1	+	32679643	32679817	32672790	32672901	32680525	32680653	12,3	0,1	4,17	4,4	0.0355685	1.0,0.6	0.333,0.68	0.293
ENSG00000125826.19	RBCK1	chr20	+	420879	421006	419557	419731	422126	422238	6,2	10,10	1,0	22,7	0.0182448	0.231,0.091	0.022,0.0	0.15
ENSG00000131051.21	RBM39	chr20	-	35739392	35739547	35738969	35739017	35740805	35740887	14,5	0,0	10,14	1,4	0.0117894	1.0,1.0	0.833,0.636	0.266
ENSG00000004534.14	RBM6	chr3	+	49999439	49999513	49975322	49975392	50048244	50048319	27,41	7,19	74,68	2,9	0.00953729	0.659,0.519	0.949,0.791	-0.281
ENSG00000168214.20	RBPJ	chr4	+	26362445	26362628	26320806	26321048	26386352	26386391	31,42	0,0	25,48	0,6	0.0349039	1.0,1.0	1.0,0.8	0.1
ENSG00000254109.5	RBPMS-AS1	chr8	-	30383127	30383362	30382123	30382615	30383543	30383697	11,13	0,0	3,6	6,1	0.000608779	1.0,1.0	0.2,0.75	0.525
ENSG00000160439.15	RDH13	chr19	-	55048045	55048257	55047386	55047488	55048328	55048541	6,19	19,10	0,2	31,23	0.000258602	0.136,0.487	0.0,0.042	0.29
ENSG00000278023.4	RDM1	chr17	-	35924603	35924772	35922477	35922675	35925514	35925637	6,5	0,0	17,12	3,4	0.00254379	1.0,1.0	0.739,0.6	0.331
ENSG00000164620.8	RELL2	chr5	+	141638169	141638409	141637436	141637741	141638794	141638860	29,8	3,3	6,11	0,0	0.00761482	0.829,0.571	1.0,1.0	-0.3
ENSG00000135945.9	REV1	chr2	-	99424772	99424899	99424151	99424280	99429839	99429945	9,16	5,4	5,3	15,18	0.000694042	0.474,0.667	0.143,0.077	0.461
ENSG00000009413.15	REV3L	chr6	-	111472012	111472140	111416282	111416472	111482749	111482919	1,1	4,2	14,12	4,3	0.0109949	0.111,0.2	0.636,0.667	-0.496
ENSG00000143207.19	RFWD2	chr1	-	176149007	176149074	176136487	176136547	176162868	176162988	74,76	0,1	54,86	6,6	0.00387774	1.0,0.975	0.822,0.881	0.136
ENSG00000143207.19	RFWD2	chr1	-	176149005	176149074	176116623	176116681	176184632	176184692	9,3	0,0	9,17	1,5	0.00505297	1.0,1.0	0.82,0.633	0.274
ENSG00000143207.19	RFWD2	chr1	-	176149005	176149074	176135009	176135086	176184632	176184692	9,22	6,0	9,13	0,0	0.0398667	0.432,1.0	1.0,1.0	-0.284
ENSG00000143207.19	RFWD2	chr1	-	176175909	176176007	176135009	176135086	176184632	176184692	45,41	6,0	35,58	0,0	0.0470787	0.789,1.0	1.0,1.0	-0.105
ENSG00000126858.16	RHOT1	chr17	+	32209349	32209445	32208106	32208309	32211115	32211238	55,59	29,28	83,70	11,15	0.0071173	0.487,0.513	0.79,0.7	-0.245
ENSG00000107036.11	RIC1	chr9	+	5656582	5656690	5629024	5629453	5689958	5690038	93182	0,0	73,87	7,6	0.000175356	1.0,1.0	0.839,0.879	0.141
ENSG00000107036.11	RIC1	chr9	+	5753535	5753646	5753199	5753238	5754840	5754930	104103	0,8	39,51	8,7	0.0352561	1.0,0.866	0.709,0.785	0.186
ENSG00000143622.10	RIT1	chr1	-	155910655	155910804	155910449	155910506	155911242	155911404	108179	0,0	66,83	9,6	1.66326e-05	1.0,1.0	0.786,0.874	0.17
ENSG00000120925.13	RNF170	chr8	-	42889302	42889414	42887727	42887871	42896483	42896598	13,2	11,52	1,0	17,42	0.0119046	0.371,0.019	0.029,0.0	0.18
ENSG00000196204.11	RNF216P1	chr7	+	4995474	4995582	4989062	4989177	4996609	4998169	4,1	12,8	21,13	5,15	0.0296457	0.143,0.059	0.677,0.302	-0.389
ENSG00000114125.13	RNF7	chr3	+	141742643	141742907	141738318	141738509	141743508	141743556	19,14	33,49	34,24	30,21	0.020548	0.224,0.125	0.362,0.364	-0.189
ENSG00000112130.16	RNF8	chr6	+	37374619	37374709	37371511	37371574	37376925	37377033	66,72	0,6	68,97	15,13	0.0266151	1.0,0.857	0.694,0.789	0.187
ENSG00000023191.16	RNH1	chr11	-	504823	505001	502061	502181	507112	507259	39,49	54,55	51,64	19,41	0.0256581	0.265,0.308	0.573,0.438	-0.219
ENSG00000067836.12	ROGDI	chr16	-	4801049	4801321	4800497	4800578	4801502	4801585	5,3	12,2	9,13	2,1	0.0109207	0.172,0.429	0.692,0.867	-0.479
ENSG00000233461.5	RP11-295G20.2	chr1	-	231524425	231524523	231522516	231522637	231528419	231528556	0,0	1,1	8,14	8,4	0.00216938	0.0,0.0	0.333,0.636	-0.485
ENSG00000273297.1	RP11-38M8.1	chr7	-	134418685	134418891	134417781	134418219	134432313	134432453	0,0	7,4	2,4	1,2	0.00166298	0.0,0.0	0.5,0.5	-0.5
ENSG00000233184.6	RP11-421L21.3	chr1	+	101077362	101077508	101025877	101026061	101086851	101087268	0,0	1,11	2,3	3,2	0.015781	0.0,0.0	0.25,0.429	-0.34
ENSG00000233184.6	RP11-421L21.3	chr1	+	101072659	101072830	101025877	101026061	101075394	101075716	0,8	12,5	5,8	1,2	0.0416097	0.0,0.444	0.714,0.667	-0.469
ENSG00000188002.10	RP11-43F13.1	chr5	-	1600317	1600522	1599120	1599827	1602690	1602735	0,2	10,15	6,4	3,5	0.0051348	0.0,0.063	0.5,0.286	-0.362
ENSG00000258301.3	RP11-488C13.5	chr14	-	76783692	76783851	76782134	76782776	76786084	76786154	5,9	3,9	1,4	17,15	0.0154593	0.455,0.333	0.029,0.118	0.321
ENSG00000242193.9	RP11-568K15.1	chr1	-	178024403	178024486	178022439	178022668	178026154	178026255	2,1	18,26	8,16	28,26	0.00652886	0.053,0.019	0.125,0.235	-0.144
ENSG00000242193.9	RP11-568K15.1	chr1	-	178024403	178024489	178022439	178022668	178026154	178026255	2,2	18,26	9,12	28,26	0.0356686	0.053,0.037	0.138,0.187	-0.118
ENSG00000254469.7	RP11-849H4.2	chr11	-	71923308	71923475	71918884	71919026	71928448	71928624	7,13	0,0	4,3	2,2	0.00425662	1.0,1.0	0.5,0.429	0.535
ENSG00000244560.6	RP4-800G7.2	chr7	+	149293750	149293842	149293376	149293492	149294379	149294412	11,16	2,4	9,10	0,0	0.00670047	0.733,0.667	1.0,1.0	-0.3
ENSG00000244560.6	RP4-800G7.2	chr7	+	149293750	149294016	149293376	149293492	149294379	149294412	20,12	2,4	7,6	0,0	0.00679626	0.833,0.6	1.0,1.0	-0.284
ENSG00000129197.14	RPAIN	chr17	+	5425970	5426299	5422768	5422829	5432541	5432876	83109	64,79	75,83	111115	0.0129618	0.393,0.408	0.253,0.265	0.141
ENSG00000129197.14	RPAIN	chr17	+	5425970	5428211	5422768	5422829	5432541	5432704	161244	64,79	133208	111115	0.0185357	0.557,0.607	0.375,0.475	0.157
ENSG00000129197.14	RPAIN	chr17	+	5425970	5426071	5422768	5422829	5432541	5432876	64,98	64,79	63,77	111115	0.0323937	0.333,0.383	0.221,0.251	0.122
ENSG00000129197.14	RPAIN	chr17	+	5425970	5426082	5422768	5422829	5432541	5432608	73109	64,79	71,89	111115	0.0332622	0.363,0.408	0.242,0.279	0.125
ENSG00000129197.14	RPAIN	chr17	+	5428070	5428211	5422768	5422829	5432541	5432876	102146	64,79	75137	111115	0.0446921	0.443,0.48	0.253,0.373	0.149
ENSG00000156313.12	RPGR	chrX	-	38287860	38288041	38276586	38276772	38290958	38291024	27,35	12,7	23,22	31,20	0.0220639	0.529,0.714	0.271,0.355	0.308
ENSG00000265681.7	RPL17	chr18	-	49491735	49491833	49491531	49491584	49492257	49492409	30,34	29,26	23,34	62,55	0.0302931	0.341,0.395	0.156,0.236	0.172
ENSG00000163684.11	RPP14	chr3	+	58310308	58310406	58306274	58306417	58310506	58310591	48,62	3,0	50,49	6,7	0.0416097	0.889,1.0	0.806,0.778	0.152
ENSG00000085721.12	RRN3	chr16	-	15086364	15086454	15086128	15086258	15091314	15091371	13,56	0,0	72,50	9,1	0.0109793	1.0,1.0	0.8,0.962	0.119
ENSG00000130347.12	RTN4IP1	chr6	-	106583327	106583420	106572002	106572103	106619201	106619326	10,10	5,0	30,12	0,0	0.0394493	0.5,1.0	1.0,1.0	-0.25
ENSG00000182552.14	RWDD4	chr4	-	183655880	183655961	183650983	183651131	183658928	183659203	13,8	0,1	3,7	4,8	0.000170309	1.0,0.8	0.273,0.304	0.612
ENSG00000182552.14	RWDD4	chr4	-	183651217	183651323	183650983	183651131	183658928	183659156	51,34	0,1	46,85	4,8	0.011899	1.0,0.944	0.852,0.842	0.125
ENSG00000182552.14	RWDD4	chr4	-	183651217	183651327	183650983	183651131	183658928	183659225	52,34	0,1	51,84	4,8	0.0127468	1.0,0.944	0.864,0.84	0.12
ENSG00000168061.13	SAC3D1	chr11	+	65043024	65043164	65041244	65041866	65044224	65044673	4,7	2,8	1,2	9,17	0.017885	0.5,0.304	0.053,0.056	0.348
ENSG00000136715.17	SAP130	chr2	-	127977984	127978089	127954985	127955344	127986784	127986959	42,26	0,3	14,29	10,14	0.000222542	1.0,0.813	0.412,0.509	0.446
ENSG00000164576.11	SAP30L	chr5	+	154452455	154452499	154451090	154451213	154453401	154453485	22,17	30,38	1,8	28,48	0.00206184	0.312,0.217	0.022,0.094	0.207
ENSG00000079332.14	SAR1A	chr10	-	70162689	70162759	70161857	70161931	70170412	70170523	2,4	14,24	10,8	8,15	0.0386063	0.067,0.077	0.386,0.212	-0.227
ENSG00000111961.16	SASH1	chr6	+	148440186	148440234	148390133	148390262	148440357	148440407	8,13	0,1	4,11	1,4	0.0350762	1.0,0.886	0.705,0.622	0.28
ENSG00000064932.15	SBNO2	chr19	-	1109505	1109598	1109134	1109211	1109682	1109777	54,56	7,0	39,29	0,0	0.0344565	0.794,1.0	1.0,1.0	-0.103
ENSG00000140497.16	SCAMP2	chr15	-	74848599	74848645	74845472	74845593	74850513	74850673	75,54	13,2	58,68	1,1	0.0127107	0.778,0.943	0.972,0.976	-0.113
ENSG00000168079.16	SCARA5	chr8	-	27966413	27966542	27921570	27922245	27987503	27987630	41,38	0,0	75,90	6,4	0.0148641	1.0,1.0	0.862,0.918	0.11
ENSG00000073060.15	SCARB1	chr12	-	124782682	124782808	124777632	124778586	124786356	124786503	92164	0,12	41,55	13,6	0.0335775	1.0,0.872	0.612,0.821	0.22
ENSG00000165689.16	SDCCAG3	chr9	-	136410089	136410239	136407825	136407938	136410327	136410527	59,31	21,19	65,55	6,10	0.0208132	0.584,0.449	0.844,0.733	-0.272
ENSG00000100445.16	SDR39U1	chr14	-	24442108	24442260	24441677	24441795	24442345	24442375	18,13	0,0	9,17	4,2	0.00278985	1.0,1.0	0.529,0.81	0.331
ENSG00000100445.16	SDR39U1	chr14	-	24442177	24442260	24441673	24441795	24442345	24442396	28,35	0,0	21,19	4,2	0.00795076	1.0,1.0	0.724,0.826	0.225
ENSG00000148396.18	SEC16A	chr9	-	136445051	136445111	136443822	136443900	136446854	136446949	6,10	1,3	28,14	0,0	0.0360015	0.765,0.644	1.0,1.0	-0.295
ENSG00000265808.3	SEC22B	chr1	-	120168839	120168949	120163209	120163370	120176306	120176515	133103	2,3	88141	14,10	0.00786703	0.971,0.945	0.759,0.876	0.14
ENSG00000138674.16	SEC31A	chr4	-	82862533	82862572	82861630	82861708	82863317	82863392	52,79	1,2	91116	14,22	0.000424735	0.971,0.962	0.808,0.774	0.175
ENSG00000138674.16	SEC31A	chr4	-	82862533	82862652	82861630	82861708	82863317	82863392	37,43	1,2	58,81	14,22	0.00141465	0.949,0.915	0.674,0.648	0.271
ENSG00000138674.16	SEC31A	chr4	-	82862533	82862674	82861630	82861708	82863317	82863392	36,43	1,2	59,81	14,22	0.0016208	0.947,0.915	0.678,0.648	0.268
ENSG00000138674.16	SEC31A	chr4	-	82861630	82861708	82857688	82857764	82862533	82862572	85144	29,42	164226	26,30	0.0166598	0.594,0.632	0.759,0.79	-0.161
ENSG00000135622.12	SEMA4F	chr2	+	74657852	74657951	74657564	74657624	74662731	74662825	10,15	19,21	30,34	1,4	3.3948e-08	0.208,0.263	0.938,0.81	-0.639
ENSG00000135622.12	SEMA4F	chr2	+	74657852	74657996	74657564	74657624	74662731	74662825	10,11	19,21	20,22	1,4	6.46967e-06	0.208,0.208	0.909,0.733	-0.613
ENSG00000112701.17	SENP6	chr6	+	75640683	75640704	75634706	75634811	75647730	75647801	49,60	19,30	32,76	52,63	0.0341992	0.667,0.609	0.324,0.484	0.234
ENSG00000138468.15	SENP7	chr3	-	101417592	101417790	101398860	101399055	101458954	101459052	38,77	0,0	62,67	7,6	0.000722538	1.0,1.0	0.816,0.848	0.168
ENSG00000138468.15	SENP7	chr3	-	101398860	101399055	101372007	101372126	101458954	101459052	26,38	0,1	35,33	5,3	0.0231221	1.0,0.95	0.778,0.846	0.163
ENSG00000138468.15	SENP7	chr3	-	101417592	101417790	101372007	101372126	101458954	101459052	37,48	0,1	44,47	5,3	0.0316129	1.0,0.96	0.815,0.887	0.129
ENSG00000138468.15	SENP7	chr3	-	101402937	101403047	101398860	101399055	101417592	101417790	8,0	9,30	0,0	21,29	0.0411435	0.308,0.0	0.0,0.0	0.154
ENSG00000183291.15	SEP15	chr1	-	86868052	86868092	86862444	86863605	86880661	86880725	182140	41,21	116164	40,68	0.0211552	0.74,0.811	0.651,0.608	0.146
ENSG00000124570.17	SERPINB6	chr6	-	2968798	2968913	2959167	2959342	2971532	2972165	4,6	4,22	0,0	17,11	0.0041769	0.333,0.12	0.0,0.0	0.227
ENSG00000187231.13	SESTD1	chr2	-	179123714	179123829	179121769	179121929	179124363	179124558	35,87	6,1	71,80	0,0	0.0239978	0.745,0.978	1.0,1.0	-0.139
ENSG00000168137.15	SETD5	chr3	+	9429568	9429667	9428822	9429009	9433844	9433950	0,0	5,10	8,6	8,6	0.000207494	0.0,0.0	0.333,0.333	-0.333
ENSG00000168137.15	SETD5	chr3	+	9429568	9429667	9428822	9429009	9429826	9430051	0,0	38,21	8,6	25,35	0.00166948	0.0,0.0	0.138,0.079	-0.109
ENSG00000170364.12	SETMAR	chr3	+	4312897	4313761	4303303	4303526	4316211	4317567	21,36	0,1	31,25	8,9	0.000171165	1.0,0.947	0.66,0.581	0.353
ENSG00000170364.12	SETMAR	chr3	+	4313646	4313761	4303336	4303526	4316211	4317265	11,26	0,1	21,15	8,9	0.000201731	1.0,0.929	0.568,0.455	0.453
ENSG00000107290.13	SETX	chr9	-	132346260	132346470	132342689	132342799	132349251	132349435	39,37	6,0	60,47	0,0	0.037857	0.765,1.0	1.0,1.0	-0.117
ENSG00000185437.13	SH3BGR	chr21	+	39499822	39499915	39475134	39475215	39508997	39509027	3,15	0,0	11,28	1,5	0.00866833	1.0,1.0	0.846,0.737	0.209
ENSG00000148341.17	SH3GLB2	chr9	-	129010669	129010765	129010119	129010209	129012235	129012298	13,8	0,1	6,19	4,5	0.013509	1.0,0.8	0.429,0.655	0.358
ENSG00000108061.11	SHOC2	chr10	+	110951607	110951792	110919592	110919657	110964124	110964524	13,14	0,1	1,0	0,4	0.0118795	1.0,0.875	1.0,0.0	0.438
ENSG00000146414.15	SHPRH	chr6	-	145940923	145941023	145940722	145940801	145941622	145941874	6,12	10,13	1,0	23,20	1.8646e-05	0.231,0.316	0.021,0.0	0.263
ENSG00000185187.12	SIGIRR	chr11	-	406842	406935	405871	406538	407061	407164	9,24	0,1	16,17	8,4	0.00233118	1.0,0.923	0.5,0.68	0.371
ENSG00000185187.12	SIGIRR	chr11	-	406842	406993	405871	406538	407061	407164	30,48	0,1	31,48	8,4	0.00379164	1.0,0.96	0.66,0.857	0.222
ENSG00000147955.16	SIGMAR1	chr9	-	34636992	34637089	34634721	34635858	34637219	34637420	137111	0,2	147214	21,21	2.79688e-06	1.0,0.965	0.778,0.836	0.175
ENSG00000147955.16	SIGMAR1	chr9	-	34636996	34637112	34635809	34635858	34637219	34637420	168156	0,2	218273	21,21	4.87087e-06	1.0,0.975	0.838,0.867	0.135
ENSG00000077463.14	SIRT6	chr19	-	4179103	4179286	4177078	4177138	4180781	4180909	133,46	7,7	66,83	0,1	0.00402291	0.905,0.767	1.0,0.976	-0.152
ENSG00000187531.13	SIRT7	chr17	-	81914603	81914702	81914192	81914530	81915439	81915512	22,19	0,0	15,30	3,6	0.00117127	1.0,1.0	0.714,0.714	0.286
ENSG00000182628.12	SKA2	chr17	-	59131285	59131367	59111887	59112345	59154955	59155177	19,18	0,2	12,17	7,14	0.000459125	1.0,0.818	0.462,0.378	0.489
ENSG00000182628.12	SKA2	chr17	-	59131280	59131361	59112046	59112345	59154955	59155177	68,79	0,2	114172	7,14	0.0141839	1.0,0.952	0.891,0.86	0.101
ENSG00000182628.12	SKA2	chr17	-	59119298	59119495	59112090	59112345	59131280	59131367	49,46	68,74	40,56	114172	0.0239978	0.265,0.237	0.149,0.14	0.106
ENSG00000165480.15	SKA3	chr13	-	21155692	21155811	21153594	21155150	21157921	21158125	21,34	0,0	101,94	8,10	0.00366316	1.0,1.0	0.863,0.825	0.156
ENSG00000165480.15	SKA3	chr13	-	21172619	21172681	21172338	21172504	21176374	21176547	1,16	0,0	31,23	2,6	0.008547	1.0,1.0	0.892,0.672	0.218
ENSG00000109171.14	SLAIN2	chr4	+	48394575	48394653	48383677	48383784	48420124	48420489	9,26	20,36	5,11	37,49	0.0187415	0.184,0.265	0.063,0.101	0.143
ENSG00000124067.16	SLC12A4	chr16	-	67950653	67951060	67950318	67950493	67951139	67951304	85109	0,0	66,67	1,7	0.0118814	1.0,1.0	0.971,0.827	0.101
ENSG00000168679.17	SLC16A4	chr1	-	110380981	110381143	110376949	110377161	110389236	110389355	26,14	6,0	29,59	1,0	0.0440104	0.684,1.0	0.935,1.0	-0.125
ENSG00000074621.13	SLC24A1	chr15	+	65645611	65645703	65644426	65644513	65650381	65650942	33,34	0,0	13,22	2,3	0.018236	1.0,1.0	0.765,0.786	0.224
ENSG00000102078.15	SLC25A14	chrX	+	130349823	130349867	130349250	130349345	130358639	130358735	0,0	27,9	7,3	20,16	0.00384172	0.0,0.0	0.178,0.104	-0.141
ENSG00000114120.11	SLC25A36	chr3	+	140966933	140967036	140963126	140963227	140970926	140970993	13,21	9,15	5,11	30,30	0.00126501	0.419,0.412	0.077,0.155	0.299
ENSG00000114120.11	SLC25A36	chr3	+	140966999	140967036	140963126	140963227	140970926	140970993	12,4	9,15	2,4	30,30	0.0406942	0.468,0.15	0.042,0.081	0.247
ENSG00000077713.18	SLC25A43	chrX	+	119410189	119410362	119399408	119399678	119452008	119452143	66,93	6,5	75,83	0,0	0.00308336	0.846,0.903	1.0,1.0	-0.125
ENSG00000130304.16	SLC27A1	chr19	+	17488847	17488939	17487459	17487529	17489007	17489117	27,36	6,0	12,9	0,0	0.0355347	0.692,1.0	1.0,1.0	-0.154
ENSG00000174669.11	SLC29A2	chr11	-	66371243	66371325	66369368	66369532	66371562	66371611	16,18	0,0	19,28	3,3	0.0208132	1.0,1.0	0.76,0.824	0.208
ENSG00000133460.19	SLC2A11	chr22	+	23877384	23877869	23877041	23877171	23882458	23882592	11,8	37,20	1,3	24,24	0.0491539	0.129,0.167	0.02,0.059	0.109
ENSG00000136856.17	SLC2A8	chr9	+	127402556	127402753	127399906	127400006	127403737	127403803	27,3	0,1	6,4	2,4	0.010818	1.0,0.6	0.6,0.333	0.334
ENSG00000117620.12	SLC35A3	chr1	+	99974970	99975069	99969978	99970162	99993536	99993741	16,13	20,17	17,31	4,5	0.000408495	0.286,0.277	0.68,0.756	-0.436
ENSG00000117620.12	SLC35A3	chr1	+	99974966	99975069	99969788	99970162	99993536	99993741	14,13	20,17	15,23	4,5	0.002143	0.259,0.277	0.652,0.697	-0.406
ENSG00000177058.11	SLC38A9	chr5	-	55711451	55711494	55697845	55697992	55712216	55712290	52,38	5,6	70,50	1,1	0.0159721	0.867,0.798	0.978,0.969	-0.141
ENSG00000165915.13	SLC39A13	chr11	+	47414776	47414905	47414424	47414475	47415059	47415159	73,85	12,3	27,41	0,0	0.00392382	0.753,0.934	1.0,1.0	-0.156
ENSG00000130821.15	SLC6A8	chrX	+	153694129	153694267	153693904	153694017	153694343	153694446	18,32	0,7	10,15	0,0	0.0193851	1.0,0.696	1.0,1.0	-0.152
ENSG00000163681.14	SLMAP	chr3	+	57865241	57865292	57864556	57864716	57890040	57890100	5,6	15,10	0,2	21,15	0.0152569	0.163,0.259	0.0,0.072	0.175
ENSG00000149346.14	SLX4IP	chr20	+	10557358	10557426	10556230	10556320	10560699	10560820	7,6	8,15	2,3	32,17	0.039943	0.309,0.17	0.031,0.083	0.182
ENSG00000175387.15	SMAD2	chr18	-	47930360	47930446	47896520	47896809	47930799	47930837	69,72	17,12	68,79	4,6	0.0454275	0.67,0.75	0.895,0.868	-0.171
ENSG00000112305.14	SMAP1	chr6	+	70699274	70699512	70667775	70668141	70732377	70732511	5,7	12,14	0,1	3,15	0.011899	0.172,0.2	0.0,0.032	0.17
ENSG00000163029.15	SMC6	chr2	-	17713384	17713580	17708638	17708753	17714860	17714877	53,16	74,54	11,7	67,50	0.00821986	0.264,0.129	0.076,0.065	0.126
ENSG00000255717.6	SNHG1	chr11	-	62854017	62854070	62853800	62853833	62854518	62854551	33,94	2,0	80,82	11,7	0.00553828	0.904,1.0	0.807,0.87	0.113
ENSG00000197989.13	SNHG12	chr1	-	28581093	28581229	28580559	28580646	28581589	28581818	78,59	0,1	32,44	2,5	0.0201754	1.0,0.967	0.889,0.815	0.132
ENSG00000197989.13	SNHG12	chr1	-	28581110	28581229	28580559	28580646	28581589	28581834	78103	0,1	33,61	2,5	0.0220429	1.0,0.981	0.892,0.859	0.115
ENSG00000196756.11	SNHG17	chr20	-	38427679	38427766	38426418	38426503	38431040	38431112	0,1	27,38	20,12	48,39	1.8646e-05	0.0,0.013	0.172,0.133	-0.146
ENSG00000196756.11	SNHG17	chr20	-	38425934	38426048	38422191	38422241	38426418	38426503	14,11	0,0	15,16	5,4	0.000874818	1.0,1.0	0.6,0.667	0.367
ENSG00000250988.7	SNHG21	chr15	+	82750820	82750848	82750565	82750714	82754628	82754784	27,1	0,0	13,15	5,1	0.00807799	1.0,1.0	0.652,0.915	0.216
ENSG00000135317.12	SNX14	chr6	-	85538837	85538864	85536791	85536924	85541984	85542043	56,93	244238	130129	174255	0.00534872	0.143,0.222	0.353,0.269	-0.129
ENSG00000089006.16	SNX5	chr20	-	17956932	17956992	17953995	17954117	17968374	17968720	13,11	7,0	20,28	0,0	0.0176908	0.502,1.0	1.0,1.0	-0.249
ENSG00000008294.20	SPAG9	chr17	-	50975862	50975901	50974770	50974947	50977107	50977221	155106	45104	55,60	109124	0.0128812	0.691,0.398	0.246,0.239	0.302
ENSG00000171763.17	SPATA5L1	chr15	+	45407028	45407223	45405458	45405505	45410371	45410491	4,4	15,9	1,2	31,35	0.0468646	0.118,0.182	0.016,0.028	0.128
ENSG00000040275.16	SPDL1	chr5	+	169587198	169587372	169583635	169583889	169588393	169588575	0,8	46,51	14,21	51,42	0.00330594	0.0,0.073	0.121,0.2	-0.124
ENSG00000040275.16	SPDL1	chr5	+	169587260	169587372	169583737	169583889	169588393	169588575	0,7	46,51	12,19	51,42	0.00462254	0.0,0.064	0.105,0.184	-0.112
ENSG00000164808.16	SPIDR	chr8	+	47727199	47727293	47713488	47713641	47735306	47735916	56,69	0,1	61,65	6,3	0.020761	1.0,0.972	0.836,0.915	0.111
ENSG00000106723.16	SPIN1	chr9	+	88416643	88416766	88415606	88415699	88418777	88418951	10,20	0,1	5,4	1,3	0.0276622	1.0,0.909	0.714,0.4	0.398
ENSG00000204991.10	SPIRE2	chr16	+	89845625	89845705	89845321	89845365	89850303	89850562	1,1	14,14	4,6	9,11	0.0347336	0.034,0.034	0.182,0.214	-0.164
ENSG00000121067.17	SPOP	chr17	-	49675894	49676016	49622732	49622876	49677932	49678099	0,2	21,22	7,5	22,18	0.0255995	0.0,0.043	0.137,0.122	-0.108
ENSG00000198369.9	SPRED2	chr2	-	65334604	65334773	65316733	65316883	65344718	65344799	12,28	0,6	21,17	0,0	0.0167749	1.0,0.7	1.0,1.0	-0.15
ENSG00000198369.9	SPRED2	chr2	-	65331986	65332051	65316733	65316883	65344718	65344896	21,27	0,6	40,55	0,0	0.0216966	1.0,0.702	1.0,1.0	-0.149
ENSG00000197694.13	SPTAN1	chr9	+	128592982	128593042	128591476	128591625	128594174	128594373	69,80	145158	112130	83115	2.5936e-05	0.205,0.216	0.423,0.38	-0.191
ENSG00000101955.14	SRPX	chrX	-	38154461	38154583	38149338	38149894	38156895	38157029	75,59	0,9	18,43	0,0	0.0272428	1.0,0.766	1.0,1.0	-0.117
ENSG00000133226.16	SRRM1	chr1	+	24647078	24647208	24646666	24646789	24648858	24649029	18,16	38,19	14,14	63,80	0.0213519	0.191,0.296	0.1,0.08	0.153
ENSG00000188529.14	SRSF10	chr1	-	23971337	23971439	23964803	23967723	23971572	23971626	99116	34,50	124196	20,39	0.0159977	0.593,0.537	0.756,0.715	-0.171
ENSG00000116754.13	SRSF11	chr1	+	70230556	70230618	70228421	70228555	70231094	70231274	0,3	10,4	5,4	0,0	3.35503e-07	0.0,0.286	1.0,1.0	-0.857
ENSG00000130511.15	SSBP4	chr19	+	18427751	18427807	18427350	18427423	18427897	18427982	26,41	7,2	33,35	0,1	0.0162842	0.675,0.92	1.0,0.951	-0.178
ENSG00000084112.14	SSH1	chr12	-	108818431	108818558	108818248	108818313	108823257	108823361	11,7	31,17	0,2	31,23	0.00133153	0.151,0.171	0.0,0.042	0.14
ENSG00000172830.12	SSH3	chr11	+	67307041	67307113	67306837	67306962	67307370	67307436	53,64	4,7	48,80	0,0	0.0012032	0.869,0.821	1.0,1.0	-0.155
ENSG00000117155.16	SSX2IP	chr1	-	84650361	84650527	84643706	84647607	84651882	84651997	44,71	10,0	93108	0,0	0.00590087	0.688,1.0	1.0,1.0	-0.156
ENSG00000126091.19	ST3GAL3	chr1	+	43858134	43858308	43838218	43838311	43894382	43894477	0,1	15,11	5,5	6,9	0.00278985	0.0,0.043	0.294,0.217	-0.234
ENSG00000007341.18	ST7L	chr1	-	112591524	112591603	112582374	112582472	112597970	112598086	10,21	0,0	4,13	4,3	0.000296607	1.0,1.0	0.333,0.684	0.491
ENSG00000007341.18	ST7L	chr1	-	112583971	112584126	112582374	112582472	112597970	112598086	17,6	0,0	10,12	4,3	0.000971293	1.0,1.0	0.556,0.667	0.388
ENSG00000118007.12	STAG1	chr3	-	136623145	136623248	136604308	136604473	136630869	136630981	76,81	0,0	83,99	14,0	0.00493821	1.0,1.0	0.748,1.0	0.126
ENSG00000204344.14	STK19	chr6	+	31979413	31979577	31978898	31978998	31980450	31980548	26,20	5,1	12,21	0,0	0.00950812	0.722,0.909	1.0,1.0	-0.184
ENSG00000204344.14	STK19	chr6	+	31979413	31979641	31978902	31978998	31980450	31980548	29,20	5,1	12,20	0,0	0.0115384	0.744,0.909	1.0,1.0	-0.173
ENSG00000204344.14	STK19	chr6	+	31980450	31980548	31978902	31978998	31980653	31980801	16,8	0,0	11,16	3,2	0.0146953	1.0,1.0	0.647,0.8	0.276
ENSG00000204344.14	STK19	chr6	+	31979413	31979553	31978898	31978998	31980450	31980548	33,49	5,1	18,27	0,0	0.0359132	0.767,0.961	1.0,1.0	-0.136
ENSG00000115808.11	STRN	chr2	-	36884519	36884606	36883931	36884075	36886715	36886826	2,4	35,45	5,13	19,29	0.0172625	0.028,0.043	0.116,0.183	-0.114
ENSG00000168818.9	STX18	chr4	-	4425163	4425213	4423517	4423587	4434769	4434858	9,32	0,1	16,17	1,7	0.0179365	1.0,0.95	0.904,0.588	0.229
ENSG00000166900.14	STX3	chr11	+	59797282	59797396	59795371	59795482	59800854	59802703	46,32	6,6	44,39	1,0	0.00196118	0.793,0.727	0.957,1.0	-0.218
ENSG00000166263.13	STXBP4	chr17	+	54990824	54990957	54986141	54986266	54999344	54999451	44,49	4,3	77,62	0,1	0.0296567	0.846,0.891	1.0,0.969	-0.116
ENSG00000127952.16	STYXL1	chr7	-	76000889	76001002	75996365	75996599	76003757	76003855	115102	2,6	153132	31,20	0.000408156	0.966,0.895	0.712,0.767	0.191
ENSG00000127952.16	STYXL1	chr7	-	76000842	76001002	75996365	75996599	76003757	76003998	21,29	2,6	41,42	31,20	0.0281742	0.84,0.707	0.398,0.512	0.318
ENSG00000064607.16	SUGP2	chr19	-	18991339	18991540	18990892	18991149	18993647	18993740	1,0	12,4	6,1	3,6	0.0316129	0.04,0.0	0.5,0.077	-0.268
ENSG00000102710.19	SUPT20H	chr13	-	37054134	37054296	37051487	37051583	37059558	37059639	1,1	6,6	9,5	4,8	0.0465797	0.077,0.077	0.529,0.238	-0.306
ENSG00000133247.13	SUV420H2	chr19	+	55342214	55342380	55341793	55342046	55342741	55342851	27,40	1,6	15,16	5,11	0.0424181	0.931,0.769	0.6,0.421	0.34
ENSG00000162520.14	SYNC	chr1	-	32684009	32684089	32680359	32681860	32684257	32684382	63,62	5,6	18,18	6,7	0.0484178	0.863,0.838	0.6,0.563	0.269
ENSG00000103528.16	SYT17	chr16	+	19172759	19172777	19168248	19168661	19173429	19173578	8,15	6,0	23,12	0,0	0.0375396	0.518,1.0	1.0,1.0	-0.241
ENSG00000137501.17	SYTL2	chr11	-	85714412	85714507	85711112	85711232	85718789	85718843	48,75	8,10	16,30	1,0	0.00968513	0.75,0.789	0.889,1.0	-0.175
ENSG00000157625.15	TAB3	chrX	-	30834050	30834152	30827441	30831575	30842965	30843049	36,57	0,0	50,65	4,3	0.0369041	1.0,1.0	0.862,0.915	0.111
ENSG00000276234.4	TADA2A	chr17	+	37426949	37427009	37423508	37423615	37437737	37437829	24,42	0,0	50,43	4,4	0.0161421	1.0,1.0	0.872,0.854	0.137
ENSG00000166012.14	TAF1D	chr11	-	93733349	93733419	93732243	93732291	93734624	93734660	7,8	0,0	17,13	2,3	0.0207238	1.0,1.0	0.811,0.686	0.251
ENSG00000144559.10	TAMM41	chr3	-	11833002	11833151	11829713	11829864	11839221	11839314	17,4	0,2	1,5	18,12	0.00038104	1.0,0.5	0.027,0.172	0.65
ENSG00000059588.9	TARBP1	chr1	-	234400852	234400948	234398381	234398553	234401180	234401262	0,8	30,52	16,12	41,43	0.0332647	0.0,0.071	0.163,0.122	-0.107
ENSG00000143374.14	TARS2	chr1	+	150496481	150496628	150492410	150492489	150497529	150497587	16,12	22,15	29,30	8,5	0.000521797	0.267,0.286	0.644,0.75	-0.421
ENSG00000143374.14	TARS2	chr1	+	150496809	150496908	150492184	150492489	150497529	150497587	40,16	22,15	38,33	8,5	0.0171774	0.476,0.348	0.704,0.767	-0.324
ENSG00000089123.15	TASP1	chr20	-	13569506	13569578	13534021	13534141	13580896	13580981	0,0	7,6	4,3	3,4	0.00208126	0.0,0.0	0.4,0.273	-0.337
ENSG00000089123.15	TASP1	chr20	-	13623445	13623514	13587249	13587370	13625184	13625252	26,52	3,6	23,23	0,0	0.005393	0.815,0.815	1.0,1.0	-0.185
ENSG00000203705.10	TATDN3	chr1	+	212804319	212804429	212797111	212797196	212804595	212804651	10,50	6,0	53,35	0,0	0.0456269	0.455,1.0	1.0,1.0	-0.272
ENSG00000125875.13	TBC1D20	chr20	-	440964	441060	440247	440389	441587	441689	0,0	44,33	0,8	30,15	0.0371612	0.0,0.0	0.0,0.211	-0.105
ENSG00000136111.12	TBC1D4	chr13	-	75341124	75341235	75336920	75337040	75341495	75341531	101,49	0,0	44,50	1,7	0.00603618	1.0,1.0	0.957,0.781	0.131
ENSG00000131374.14	TBC1D5	chr3	-	17586352	17586557	17508548	17508605	17622647	17622765	30,8	0,0	2,6	1,6	1.45807e-05	1.0,1.0	0.5,0.333	0.584
ENSG00000131374.14	TBC1D5	chr3	-	17586352	17586557	17508548	17508605	17623848	17623913	28,9	11,16	2,3	17,22	0.00444938	0.56,0.22	0.056,0.064	0.33
ENSG00000131374.14	TBC1D5	chr3	-	17562018	17562142	17508473	17508605	17623848	17623913	23,39	11,16	18,10	17,22	0.0393625	0.511,0.549	0.346,0.185	0.265
ENSG00000131374.14	TBC1D5	chr3	-	17622647	17622765	17518901	17518995	17623848	17623913	1,16	1,7	8,21	0,2	0.0426955	0.333,0.533	1.0,0.84	-0.487
ENSG00000177565.15	TBL1XR1	chr3	-	177098465	177098541	177064919	177065022	177131362	177131449	44,46	0,2	53,27	6,5	0.0225793	1.0,0.92	0.815,0.73	0.188
ENSG00000179152.19	TCAIM	chr3	+	44362419	44362464	44361364	44361518	44367531	44367708	0,1	15,24	3,4	12,19	0.0478058	0.0,0.025	0.133,0.114	-0.111
ENSG00000168778.11	TCTN2	chr12	+	123688063	123688177	123686835	123687035	123690532	123690674	19,21	0,0	6,18	0,5	0.0316129	1.0,1.0	1.0,0.643	0.178
ENSG00000107140.15	TESK1	chr9	+	35607326	35607409	35606836	35606983	35607581	35607672	61,38	0,7	48,50	0,0	0.0248777	1.0,0.731	1.0,1.0	-0.135
ENSG00000187605.15	TET3	chr2	+	74046277	74048411	74003109	74003166	74073548	74073639	8,15	0,0	9,15	1,4	0.0117835	1.0,1.0	0.818,0.652	0.265
ENSG00000136891.13	TEX10	chr9	-	100329139	100329275	100327786	100327962	100340256	100340369	44,52	11,1	58,72	0,1	0.00623876	0.667,0.963	1.0,0.973	-0.171
ENSG00000226174.6	TEX22	chr14	+	105449358	105449409	105438671	105438739	105450057	105450106	17,13	0,0	9,15	6,2	0.00114807	1.0,1.0	0.467,0.814	0.36
ENSG00000226174.6	TEX22	chr14	+	105445417	105445511	105438671	105438739	105450057	105450106	45,69	0,0	56,64	6,2	0.0127108	1.0,1.0	0.824,0.941	0.118
ENSG00000151287.16	TEX30	chr13	-	102767272	102767478	102766109	102766580	102768259	102768311	71,63	1,1	93,59	3,14	0.0144214	0.973,0.969	0.939,0.678	0.162
ENSG00000100109.16	TFIP11	chr22	-	26511118	26511317	26510616	26510702	26512098	26512175	22,10	13,9	2,6	25,17	0.000807784	0.458,0.357	0.038,0.15	0.314
ENSG00000100109.16	TFIP11	chr22	-	26511118	26511195	26510616	26510702	26512098	26512175	19,14	13,9	3,11	25,17	0.0187835	0.422,0.438	0.057,0.244	0.279
ENSG00000251022.6	THAP9-AS1	chr4	-	82897988	82898062	82895690	82895774	82900076	82900223	16,5	0,0	14,18	1,4	0.0216966	1.0,1.0	0.875,0.692	0.217
ENSG00000259431.5	THTPA	chr14	+	23556742	23557039	23556270	23556343	23558694	23558859	28,5	0,0	12,10	4,2	0.00154133	1.0,1.0	0.6,0.714	0.343
ENSG00000259431.5	THTPA	chr14	+	23556742	23557034	23556270	23556343	23558694	23558898	11,2	0,0	8,13	4,2	0.00225141	1.0,1.0	0.5,0.765	0.367
ENSG00000259431.5	THTPA	chr14	+	23556742	23557304	23556006	23556343	23558694	23559574	46,39	0,0	22,23	4,2	0.00886425	1.0,1.0	0.733,0.852	0.208
ENSG00000166548.15	TK2	chr16	-	66541878	66541953	66536963	66537017	66548977	66549009	84,98	16,11	71113	3,5	0.0316129	0.724,0.817	0.922,0.919	-0.15
ENSG00000106829.18	TLE4	chr9	+	79627373	79627448	79612655	79612718	79652592	79652794	33,15	5,2	24,19	0,1	0.032403	0.767,0.789	1.0,0.905	-0.174
ENSG00000146872.17	TLK2	chr17	+	62524235	62524331	62523133	62523177	62536169	62536337	34,33	57,96	15,18	80101	0.0191143	0.23,0.147	0.086,0.082	0.105
ENSG00000162604.12	TM2D1	chr1	-	61686791	61686921	61683451	61683546	61694696	61694770	58,46	89,75	19,20	118,77	0.00011931	0.246,0.235	0.075,0.115	0.145
ENSG00000162604.12	TM2D1	chr1	-	61686791	61686895	61683496	61683546	61694696	61694770	47,25	89,75	15,15	118,77	0.0028415	0.209,0.143	0.06,0.089	0.101
ENSG00000139644.12	TMBIM6	chr12	+	49741956	49742115	49741607	49741768	49752463	49752549	21,29	0,0	18,20	2,3	0.0267079	1.0,1.0	0.818,0.769	0.207
ENSG00000141524.15	TMC6	chr17	-	78126776	78126974	78126523	78126648	78128658	78128758	59,63	0,9	47,65	0,0	0.0138981	1.0,0.778	1.0,1.0	-0.111
ENSG00000141524.15	TMC6	chr17	-	78126776	78126906	78126523	78126648	78128658	78128772	67,65	0,9	49,68	0,0	0.0154925	1.0,0.783	1.0,1.0	-0.109
ENSG00000172765.16	TMCC1	chr3	-	129867009	129867098	129857253	129857405	129880308	129880559	0,0	8,4	9,4	10,13	0.0035261	0.0,0.0	0.31,0.133	-0.222
ENSG00000150403.17	TMCO3	chr13	+	113534135	113534240	113520615	113520733	113539356	113539507	60,86	9,7	57,68	1,2	0.037857	0.769,0.86	0.966,0.944	-0.14
ENSG00000137210.13	TMEM14B	chr6	+	10751132	10751234	10749664	10749698	10755141	10755232	233276	11,16	209286	27,39	0.00803631	0.914,0.896	0.795,0.786	0.115
ENSG00000011638.10	TMEM159	chr16	+	21166839	21166911	21161084	21161278	21170436	21170605	19,11	53,52	0,2	39,47	9.51702e-05	0.152,0.096	0.0,0.021	0.114
ENSG00000064545.14	TMEM161A	chr19	-	19133129	19133210	19132656	19132754	19134783	19134887	38,46	8,0	59,57	0,0	0.0122784	0.704,1.0	1.0,1.0	-0.148
ENSG00000064545.14	TMEM161A	chr19	-	19133129	19133306	19132656	19132754	19134783	19134887	35,39	8,0	49,40	0,0	0.0130511	0.686,1.0	1.0,1.0	-0.157
ENSG00000127419.16	TMEM175	chr4	+	947708	948154	932474	932540	950420	950491	17,11	0,0	10,6	3,1	0.0330368	1.0,1.0	0.625,0.75	0.313
ENSG00000138111.14	TMEM180	chr10	+	102468752	102468842	102465980	102466087	102468954	102469197	0,0	8,4	5,5	2,4	0.000195495	0.0,0.0	0.556,0.385	-0.471
ENSG00000240849.10	TMEM189	chr20	-	50151211	50151315	50143501	50143621	50153516	50153734	5,2	46,47	6,8	10,28	0.0328973	0.052,0.021	0.231,0.125	-0.141
ENSG00000134490.13	TMEM241	chr18	-	23370215	23370261	23368714	23368750	23371421	23371470	9,5	0,0	9,18	4,1	0.0257481	1.0,1.0	0.578,0.916	0.253
ENSG00000106609.16	TMEM248	chr7	+	66922148	66922246	66921231	66921461	66941847	66942024	0,2	10,32	9,17	10,17	7.21576e-06	0.0,0.03	0.31,0.333	-0.306
ENSG00000151135.9	TMEM263	chr12	+	106959269	106959385	106957081	106957149	106967110	106967180	9,21	93,47	0,5	58,95	0.000822721	0.046,0.183	0.0,0.026	0.101
ENSG00000137216.18	TMEM63B	chr6	+	44150563	44150629	44150223	44150310	44151845	44152008	38,62	7,0	52,74	0,0	0.0247807	0.738,1.0	1.0,1.0	-0.131
ENSG00000125895.5	TMEM74B	chr20	-	1183770	1183948	1181156	1181587	1185137	1185415	5,30	8,8	9,7	0,1	0.0099895	0.238,0.652	1.0,0.778	-0.444
ENSG00000125895.5	TMEM74B	chr20	-	1183770	1183885	1181156	1181587	1185137	1185415	15,30	8,8	9,7	0,1	0.0166936	0.484,0.652	1.0,0.778	-0.321
ENSG00000109084.13	TMEM97	chr17	+	28325507	28325651	28319268	28319365	28326533	28328225	6,27	0,0	17,17	1,4	0.0242477	1.0,1.0	0.895,0.68	0.212
ENSG00000121858.10	TNFSF10	chr3	-	172511616	172511659	172509145	172509321	172514860	172514998	15,18	12,0	12,25	0,1	0.0437855	0.439,1.0	1.0,0.94	-0.25
ENSG00000145901.14	TNIP1	chr5	-	151033607	151033839	151032286	151032383	151035001	151035067	75109	0,0	37,44	3,6	0.000832928	1.0,1.0	0.86,0.786	0.177
ENSG00000145901.14	TNIP1	chr5	-	151033607	151033811	151032286	151032383	151035001	151035067	73109	0,0	37,45	3,6	0.000917494	1.0,1.0	0.86,0.789	0.175
ENSG00000061938.16	TNK2	chr3	-	195867168	195867258	195866888	195867016	195867360	195868709	18,14	0,0	6,8	3,1	0.0324543	1.0,1.0	0.5,0.8	0.35
ENSG00000100354.20	TNRC6B	chr22	+	40125771	40125862	40117054	40117128	40156114	40156182	31,41	3,5	16,22	0,0	0.00948486	0.838,0.804	1.0,1.0	-0.179
ENSG00000141198.13	TOM1L1	chr17	+	54903707	54903792	54900869	54900923	54912665	54912815	37,61	0,0	49,66	4,4	0.0175422	1.0,1.0	0.86,0.892	0.124
ENSG00000197579.7	TOPORS	chr9	-	32551364	32551469	32550773	32550968	32552433	32552553	9,5	16,23	0,3	22,30	0.0211552	0.22,0.098	0.0,0.048	0.135
ENSG00000169905.12	TOR1AIP2	chr1	-	179865678	179865766	179852631	179852811	179877238	179877373	4,8	6,19	0,2	12,23	0.010818	0.25,0.174	0.0,0.042	0.191
ENSG00000169905.12	TOR1AIP2	chr1	-	179865678	179865835	179852631	179852811	179877238	179877373	4,7	6,19	0,2	12,23	0.0184977	0.25,0.156	0.0,0.042	0.182
ENSG00000160404.17	TOR2A	chr9	-	127732563	127732691	127731843	127732278	127733384	127733560	62,47	6,0	44,46	7,14	0.0378774	0.838,1.0	0.759,0.622	0.229
ENSG00000186283.13	TOR3A	chr1	+	179085627	179085893	179082939	179083053	179087910	179088089	69116	0,2	157186	11,14	0.00350034	1.0,0.967	0.877,0.869	0.111
ENSG00000115129.13	TP53I3	chr2	-	24079529	24079640	24077434	24077761	24080818	24080992	149148	22,24	261238	12,7	0.000143744	0.772,0.755	0.916,0.944	-0.166
ENSG00000115129.13	TP53I3	chr2	-	24079443	24079640	24077434	24077761	24080818	24081020	235298	22,24	375385	12,7	0.00097777	0.842,0.861	0.94,0.965	-0.101
ENSG00000115129.13	TP53I3	chr2	-	24079529	24079616	24077434	24077761	24080818	24081020	8,4	22,24	0,0	12,7	0.0128636	0.154,0.077	0.0,0.0	0.115
ENSG00000115129.13	TP53I3	chr2	-	24079443	24079607	24077434	24077761	24080818	24080992	86152	22,24	114147	12,7	0.0303607	0.662,0.76	0.826,0.913	-0.158
ENSG00000115129.13	TP53I3	chr2	-	24079443	24079616	24077434	24077761	24080818	24081031	94154	22,24	114147	12,7	0.036717	0.681,0.762	0.826,0.913	-0.148
ENSG00000101150.17	TPD52L2	chr20	+	63875815	63875875	63873667	63873816	63882718	63882820	250266	67,54	169205	73,92	0.00920613	0.669,0.728	0.557,0.547	0.146
ENSG00000159713.10	TPPP3	chr16	-	67392946	67393037	67390923	67391117	67393379	67393518	0,2	15,16	3,8	9,17	0.0321924	0.0,0.059	0.143,0.19	-0.137
ENSG00000163870.14	TPRA1	chr3	-	127590409	127590592	127580021	127580163	127590882	127591088	43,19	0,0	13,20	2,7	0.000238302	1.0,1.0	0.765,0.588	0.324
ENSG00000163870.14	TPRA1	chr3	-	127575748	127575809	127575402	127575505	127575939	127576050	85110	2,5	81,71	12,10	0.0173786	0.958,0.922	0.784,0.793	0.151
ENSG00000131323.14	TRAF3	chr14	+	102891324	102891417	102876357	102876525	102897260	102897401	52,58	0,0	38,54	4,6	0.00144219	1.0,1.0	0.826,0.818	0.178
ENSG00000131323.14	TRAF3	chr14	+	102886188	102886269	102876357	102876525	102897260	102897401	32,68	0,0	37,57	4,6	0.00176259	1.0,1.0	0.822,0.826	0.176
ENSG00000225791.6	TRAM2-AS1	chr6	+	52578501	52578594	52578365	52578393	52579374	52579609	0,3	6,8	6,4	2,3	0.0344101	0.0,0.158	0.6,0.4	-0.421
ENSG00000196459.13	TRAPPC2	chrX	-	13734043	13734185	13719870	13719982	13734524	13734556	20,45	0,4	32,22	10,10	0.0103428	1.0,0.849	0.615,0.524	0.355
ENSG00000124496.12	TRERF1	chr6	-	42263319	42263568	42259338	42259723	42264703	42264854	13,28	0,2	2,15	3,7	0.00496919	1.0,0.875	0.25,0.517	0.554
ENSG00000124496.12	TRERF1	chr6	-	42263319	42263430	42259338	42259723	42264703	42264854	4,25	0,2	0,11	3,7	0.00516494	1.0,0.862	0.0,0.44	0.711
ENSG00000183479.12	TREX2	chrX	-	153454876	153455053	153454393	153454508	153455541	153455766	4,4	26,10	33,40	37,38	0.00541606	0.071,0.167	0.308,0.345	-0.208
ENSG00000132256.18	TRIM5	chr11	-	5665980	5666081	5663616	5665682	5667688	5667711	157114	5,5	59,53	18,17	8.55157e-07	0.94,0.919	0.621,0.609	0.315
ENSG00000167333.12	TRIM68	chr11	-	4605078	4605561	4603240	4603340	4608026	4608138	11,29	0,0	36,42	4,3	0.0251726	1.0,1.0	0.818,0.875	0.153
ENSG00000100815.12	TRIP11	chr14	-	92010985	92011072	91999967	92000108	92011754	92011795	10,35	7,0	32,31	0,0	0.0346363	0.417,1.0	1.0,1.0	-0.291
ENSG00000188917.14	TRMT2B	chrX	-	101051643	101051733	101041316	101041371	101051816	101052070	10,20	0,1	6,13	2,3	0.0318465	1.0,0.909	0.6,0.684	0.313
ENSG00000144935.14	TRPC1	chr3	+	142792824	142792967	142791018	142791158	142802168	142802344	20,14	0,0	20,7	4,5	0.000292605	1.0,1.0	0.714,0.412	0.437
ENSG00000149743.13	TRPT1	chr11	-	64224099	64224133	64223798	64223967	64224284	64224341	63,76	0,0	49,55	8,9	1.69371e-05	1.0,1.0	0.806,0.806	0.194
ENSG00000149743.13	TRPT1	chr11	-	64224099	64224213	64223829	64223967	64224284	64224341	163153	0,0	112114	8,9	3.52312e-05	1.0,1.0	0.875,0.864	0.131
ENSG00000149743.13	TRPT1	chr11	-	64224099	64224162	64223829	64223967	64224284	64224341	158148	0,0	110113	8,9	4.29008e-05	1.0,1.0	0.879,0.869	0.126
ENSG00000149743.13	TRPT1	chr11	-	64224099	64224210	64223829	64223967	64224284	64224341	197211	0,0	138140	8,9	5.66064e-05	1.0,1.0	0.896,0.886	0.109
ENSG00000149743.13	TRPT1	chr11	-	64224800	64224970	64224542	64224717	64225498	64225580	92155	2,3	56,70	11,6	0.0041138	0.958,0.963	0.718,0.854	0.174
ENSG00000149743.13	TRPT1	chr11	-	64224794	64224970	64224542	64224717	64225498	64225580	22,74	2,3	21,24	11,6	0.00553828	0.846,0.925	0.488,0.667	0.308
ENSG00000196428.12	TSC22D2	chr3	+	150438197	150438354	150423048	150423120	150457075	150457127	2,1	11,2	3,1	0,0	2.02107e-06	0.083,0.2	1.0,1.0	-0.859
ENSG00000154743.17	TSEN2	chr3	+	12505153	12505231	12503261	12503784	12516610	12516661	31,25	0,0	39,50	0,8	0.0206735	1.0,1.0	1.0,0.758	0.121
ENSG00000171045.14	TSNARE1	chr8	-	142354636	142354763	142345742	142345892	142403103	142403240	12,14	5,0	7,8	0,0	0.0430453	0.545,1.0	1.0,1.0	-0.228
ENSG00000149292.16	TTC12	chr11	+	113329641	113329808	113325523	113325645	113329919	113329979	7,8	13,15	0,1	25,25	0.000131143	0.212,0.211	0.0,0.02	0.201
ENSG00000103852.12	TTC23	chr15	-	99245388	99245510	99241364	99241559	99249416	99249518	26,17	5,7	12,18	1,0	0.00786394	0.722,0.548	0.857,1.0	-0.293
ENSG00000115282.19	TTC31	chr2	+	74490024	74490127	74483321	74483410	74490243	74491184	43,98	0,0	57,87	9,3	0.00180563	1.0,1.0	0.76,0.935	0.152
ENSG00000113638.12	TTC33	chr5	-	40728344	40728476	40715943	40716498	40746797	40747019	48,37	5,8	41,51	0,1	0.00149478	0.828,0.698	1.0,0.962	-0.218
ENSG00000113638.12	TTC33	chr5	-	40730261	40730343	40716144	40716498	40746797	40747019	81117	5,8	110124	0,1	0.00247839	0.89,0.88	1.0,0.984	-0.107
ENSG00000165914.14	TTC7B	chr14	-	90578105	90578308	90540641	90541589	90593485	90593626	28,30	0,0	19,25	3,2	0.0389554	1.0,1.0	0.76,0.862	0.189
ENSG00000119685.19	TTLL5	chr14	+	75757830	75757869	75752892	75752955	75764614	75764772	12,12	17,34	4,4	29,34	0.0416569	0.314,0.186	0.082,0.071	0.173
ENSG00000124120.10	TTPAL	chr20	+	44484336	44484428	44479984	44480444	44486595	44486706	35,54	0,8	53,67	0,0	0.0110417	1.0,0.771	1.0,1.0	-0.115
ENSG00000104723.20	TUSC3	chr8	+	15748374	15748465	15743443	15743612	15764202	15764661	148211	0,10	176170	15,15	0.0278287	1.0,0.913	0.854,0.85	0.105
ENSG00000197763.12	TXNRD3	chr3	-	126623724	126623818	126622463	126622540	126629378	126629471	1,0	13,22	8,7	16,34	0.00693652	0.037,0.0	0.2,0.093	-0.128
ENSG00000105397.13	TYK2	chr19	-	10369756	10369877	10368328	10368418	10378213	10378426	7,9	29,27	1,1	28,34	0.00349756	0.108,0.143	0.018,0.014	0.11
ENSG00000025708.13	TYMP	chr22	-	50528511	50528610	50527587	50527717	50529135	50529338	56,73	8,0	55,55	0,0	0.0231907	0.778,1.0	1.0,1.0	-0.111
ENSG00000156521.13	TYSND1	chr10	-	70143841	70143972	70137980	70140141	70145420	70146586	46,66	7,0	81,79	0,0	0.0260209	0.767,1.0	1.0,1.0	-0.117
ENSG00000150991.14	UBC	chr12	-	124913267	124913495	124913034	124913039	124913723	124913774	45,58	0,1	75,53	3,6	0.0287302	1.0,0.967	0.926,0.815	0.113
ENSG00000078967.12	UBE2D4	chr7	+	43942953	43943031	43938430	43938494	43948631	43948737	23,21	0,0	19,42	0,7	0.0179151	1.0,1.0	1.0,0.75	0.125
ENSG00000184182.18	UBE2F	chr2	+	237987962	237987992	237973091	237973225	238025341	238025412	18,16	1,8	18,22	0,0	0.00403305	0.927,0.586	1.0,1.0	-0.244
ENSG00000184182.18	UBE2F	chr2	+	237994743	237994809	237987962	237987992	238025341	238025412	43,63	0,0	51,69	3,4	0.038796	1.0,1.0	0.898,0.899	0.101
ENSG00000140367.11	UBE2Q2	chr15	+	75859877	75859982	75854385	75854487	75868950	75869010	423456	104,66	412547	36,51	0.00638625	0.67,0.776	0.851,0.843	-0.124
ENSG00000140367.11	UBE2Q2	chr15	+	75859877	75859977	75854385	75854487	75868950	75869010	92,71	104,66	82,96	36,51	0.00658655	0.307,0.35	0.532,0.485	-0.18
ENSG00000259429.5	UBE2Q2P2	chr15	+	82400659	82400716	82355141	82355374	82404611	82404751	28,9	0,0	16,22	9,4	0.000254726	1.0,1.0	0.497,0.753	0.375
ENSG00000259429.5	UBE2Q2P2	chr15	+	82400632	82400716	82355141	82355374	82404611	82404733	11,8	0,0	12,22	9,4	0.000632789	1.0,1.0	0.4,0.733	0.433
ENSG00000151148.13	UBE3B	chr12	+	109481636	109481742	109477654	109477764	109483530	109483712	33,60	8,5	43,43	0,0	0.000531652	0.673,0.857	1.0,1.0	-0.235
ENSG00000118420.16	UBE3D	chr6	-	83054147	83054238	83044427	83044659	83057825	83058022	18,32	4,1	30,30	0,0	0.0495982	0.692,0.941	1.0,1.0	-0.183
ENSG00000110344.9	UBE4A	chr11	+	118364677	118364703	118359643	118359674	118365039	118365201	2,9	6,6	0,0	15,20	0.000214246	0.197,0.525	0.0,0.0	0.361
ENSG00000144357.16	UBR3	chr2	+	169877479	169877637	169875793	169875949	169878524	169878574	71,58	2,0	63,62	4,8	0.0217486	0.947,1.0	0.887,0.795	0.133
ENSG00000012963.13	UBR7	chr14	+	93212031	93212127	93210647	93210708	93214928	93214982	44114	2,0	105107	12,6	0.00675867	0.917,1.0	0.814,0.899	0.102
ENSG00000012963.13	UBR7	chr14	+	93210647	93210708	93207055	93207441	93212031	93212127	15,49	0,0	29,40	1,5	0.0318465	1.0,1.0	0.94,0.812	0.124
ENSG00000158062.20	UBXN11	chr1	-	26300925	26301024	26297961	26298062	26301693	26301719	0,2	10,7	16,10	8,3	9.76588e-05	0.0,0.125	0.5,0.625	-0.5
ENSG00000158062.20	UBXN11	chr1	-	26300925	26301053	26297961	26298062	26301693	26301722	0,6	10,7	15,7	8,3	0.0454707	0.0,0.3	0.484,0.538	-0.361
ENSG00000163960.11	UBXN7	chr3	-	196404054	196404080	196402951	196403019	196407245	196407393	5,2	17,17	0,0	8,7	0.0272263	0.178,0.08	0.0,0.0	0.129
ENSG00000198276.13	UCKL1	chr20	-	63943652	63943669	63941109	63941208	63944396	63944458	27,19	0,0	16,18	4,2	0.0175577	1.0,1.0	0.765,0.88	0.177
ENSG00000169764.14	UGP2	chr2	+	63842058	63842204	63840953	63841232	63856305	63856433	127147	74,49	56,70	46,97	0.0158555	0.462,0.6	0.378,0.265	0.21
ENSG00000169764.14	UGP2	chr2	+	63842061	63842204	63840939	63841232	63856305	63856433	127147	74,49	56,71	46,97	0.0159977	0.462,0.6	0.378,0.268	0.208
ENSG00000169764.14	UGP2	chr2	+	63842026	63842204	63840939	63841232	63856305	63856433	127147	74,49	56,71	46,97	0.0159977	0.462,0.6	0.378,0.268	0.208
ENSG00000140474.12	ULK3	chr15	-	74842534	74842674	74842279	74842420	74843003	74843124	3,2	65,17	13,7	24,28	0.00505297	0.023,0.056	0.213,0.111	-0.122
ENSG00000132478.9	UNK	chr17	+	75808947	75809039	75784861	75784984	75809759	75809969	0,2	2,11	9,9	4,13	0.0242477	0.0,0.083	0.529,0.257	-0.352
ENSG00000173660.11	UQCRH	chr1	+	46309896	46310044	46309100	46309127	46310154	46310316	228208	390479	133151	569711	1.04925e-06	0.226,0.178	0.105,0.096	0.102
ENSG00000173915.12	USMG5	chr10	-	103394198	103394394	103392370	103392466	103396408	103396466	2,14	16,20	0,1	26,35	0.000578318	0.059,0.259	0.0,0.014	0.152
ENSG00000077254.14	USP33	chr1	-	77745420	77745599	77741616	77741748	77746398	77746556	24,38	8,0	24,28	0,0	0.0181562	0.6,1.0	1.0,1.0	-0.2
ENSG00000118369.12	USP35	chr11	+	78197935	78198068	78188902	78189157	78199594	78199724	5,0	0,10	2,5	0,0	0.0157146	1.0,0.0	1.0,1.0	-0.5
ENSG00000170242.17	USP47	chr11	+	11880176	11880380	11841974	11842224	11884466	11884580	109193	9,5	151155	26,24	0.00328568	0.858,0.951	0.744,0.764	0.15
ENSG00000138592.13	USP8	chr15	+	50484274	50484361	50481480	50482065	50489800	50489881	202305	125154	147232	144249	0.00171272	0.447,0.498	0.338,0.318	0.145
ENSG00000138592.13	USP8	chr15	+	50424595	50424654	50424447	50424514	50439008	50439177	6,5	32,27	17,21	22,19	0.00180563	0.093,0.092	0.297,0.377	-0.244
ENSG00000115652.14	UXS1	chr2	-	106096717	106096820	106093302	106094157	106098715	106098773	63,57	0,1	56,51	5,4	0.0159003	1.0,0.966	0.848,0.864	0.127
ENSG00000126756.11	UXT	chrX	-	47657204	47657285	47652080	47652144	47657571	47657639	9,17	0,0	12,7	2,2	0.043076	1.0,1.0	0.75,0.636	0.307
ENSG00000116035.2	VAX2	chr2	+	70924275	70924338	70921097	70921285	70932766	70933446	18,13	0,0	5,13	2,3	0.00710054	1.0,1.0	0.57,0.697	0.367
ENSG00000100483.13	VCPKMT	chr14	-	50116079	50116179	50115838	50115911	50116286	50116600	10,17	0,5	16,23	0,0	0.0368776	1.0,0.63	1.0,1.0	-0.185
ENSG00000100483.13	VCPKMT	chr14	-	50116068	50116179	50115838	50115911	50116286	50116600	16,20	0,5	17,20	0,0	0.0478058	1.0,0.667	1.0,1.0	-0.166
ENSG00000028203.17	VEZT	chr12	+	95257206	95257239	95251939	95252071	95266356	95266384	7,0	9,5	0,0	5,10	0.0175577	0.348,0.0	0.0,0.0	0.174
ENSG00000147852.15	VLDLR	chr9	+	2651414	2651498	2650369	2650516	2651873	2651954	109104	16,24	8,27	8,20	0.00131645	0.773,0.684	0.333,0.403	0.361
ENSG00000197969.11	VPS13A	chr9	+	77283354	77283471	77282208	77282274	77283546	77283650	99158	19,20	113112	2,7	0.0055881	0.723,0.798	0.966,0.889	-0.167
ENSG00000111237.18	VPS29	chr12	-	110498819	110498859	110496011	110496203	110499534	110499546	0,1	3,18	7,2	17,18	0.047017	0.0,0.034	0.209,0.067	-0.121
ENSG00000136100.12	VPS36	chr13	-	52417991	52418056	52417056	52417141	52425931	52426066	11,51	6,0	40,70	0,0	0.043862	0.489,1.0	1.0,1.0	-0.256
ENSG00000143952.19	VPS54	chr2	-	63981645	63981845	63972165	63972244	63983863	63984019	74,21	0,0	51,53	7,3	0.00300079	1.0,1.0	0.785,0.898	0.158
ENSG00000143952.19	VPS54	chr2	-	63981645	63981690	63972165	63972244	63983863	63984019	65,14	0,0	49,43	7,3	0.00378134	1.0,1.0	0.811,0.898	0.145
ENSG00000143952.19	VPS54	chr2	-	63981645	63981887	63972165	63972244	63983863	63984019	92,46	0,0	77,81	7,3	0.00644078	1.0,1.0	0.846,0.931	0.111
ENSG00000105053.10	VRK3	chr19	-	50009235	50009289	50007568	50007826	50016023	50016163	95132	7,9	95120	15,25	0.0347336	0.885,0.893	0.783,0.732	0.131
ENSG00000176834.13	VSIG10	chr12	-	118121500	118121618	118117666	118117882	118126480	118126670	0,2	10,23	2,6	3,7	0.0109949	0.0,0.042	0.25,0.3	-0.254
ENSG00000163625.15	WDFY3	chr4	-	84726860	84726911	84724425	84724594	84733381	84733609	51,54	0,2	47,63	7,12	0.00144908	1.0,0.94	0.797,0.754	0.194
ENSG00000118965.14	WDR35	chr2	-	19914036	19914277	19910259	19913708	19930395	19930552	27,58	0,0	64,66	4,5	0.0137258	1.0,1.0	0.889,0.868	0.121
ENSG00000109046.14	WSB1	chr17	+	27307743	27307902	27306762	27306882	27309099	27309272	94171	73,52	27,27	45,49	0.00586473	0.392,0.622	0.231,0.216	0.283
ENSG00000109046.14	WSB1	chr17	+	27307743	27307907	27306781	27306882	27309099	27309272	94172	73,52	27,27	45,49	0.00593772	0.392,0.623	0.231,0.216	0.284
ENSG00000109046.14	WSB1	chr17	+	27307743	27307919	27306781	27306882	27309099	27309272	94184	73,52	35,32	45,49	0.0316058	0.392,0.639	0.28,0.246	0.253
ENSG00000101966.12	XIAP	chrX	+	123885630	123886539	123860026	123860293	123888618	123888718	190128	3,5	112109	15,16	0.000358356	0.969,0.928	0.789,0.773	0.167
ENSG00000196584.2	XRCC2	chr7	-	152660700	152660782	152644778	152649363	152676040	152676165	8,16	2,3	39,32	0,0	0.007499	0.667,0.727	1.0,1.0	-0.303
ENSG00000127337.6	YEATS4	chr12	+	69365632	69365699	69362787	69362907	69370705	69370798	74,57	1,1	57,56	10,15	2.48918e-05	0.974,0.967	0.746,0.658	0.268
ENSG00000058799.13	YIPF1	chr1	-	53883112	53883261	53878641	53878722	53888906	53888986	73100	0,0	67,70	5,6	0.00144908	1.0,1.0	0.87,0.854	0.138
ENSG00000058799.13	YIPF1	chr1	-	53866199	53866382	53860055	53860153	53871371	53871488	41,57	7,1	58,71	0,0	0.00869326	0.745,0.966	1.0,1.0	-0.145
ENSG00000058799.13	YIPF1	chr1	-	53866757	53866924	53860055	53860153	53871371	53871488	52,83	7,1	69109	0,0	0.0137726	0.788,0.976	1.0,1.0	-0.118
ENSG00000130733.10	YIPF2	chr19	-	10927629	10927716	10925685	10925773	10927798	10927959	71,56	4,2	28,49	11,8	0.0157146	0.899,0.933	0.56,0.754	0.259
ENSG00000119596.17	YLPM1	chr14	+	74797579	74799697	74781384	74782325	74802555	74802676	42,59	0,0	61,73	7,10	0.000166808	1.0,1.0	0.813,0.785	0.201
ENSG00000126804.13	ZBTB1	chr14	+	64511248	64511384	64504725	64504946	64516599	64516751	11,12	5,0	2,3	0,0	0.0419825	0.524,1.0	1.0,1.0	-0.238
ENSG00000181722.15	ZBTB20	chr3	-	114688314	114688375	114500351	114500391	114693527	114693575	0,0	5,44	4,5	8,25	0.00516494	0.0,0.0	0.212,0.097	-0.154
ENSG00000181722.15	ZBTB20	chr3	-	114380776	114380940	114380216	114380404	114383615	114383641	9,16	6,0	9,8	0,0	0.0355444	0.429,1.0	1.0,1.0	-0.285
ENSG00000176261.15	ZBTB8OS	chr1	-	32634701	32634792	32633950	32634072	32650432	32650525	29,28	0,0	16,39	1,5	0.0187763	1.0,1.0	0.889,0.796	0.157
ENSG00000155329.11	ZCCHC10	chr5	-	133000131	133000201	132998527	132998850	133006758	133006920	47,40	0,0	35,46	2,4	0.0373991	1.0,1.0	0.898,0.853	0.125
ENSG00000134744.13	ZCCHC11	chr1	-	52458335	52458449	52446589	52446667	52461133	52461223	25,62	0,0	42,45	5,4	0.00380301	1.0,1.0	0.808,0.849	0.171
ENSG00000078487.17	ZCWPW1	chr7	-	100415974	100416097	100409427	100409544	100425029	100425136	10,13	0,5	1,7	0,0	0.0378774	1.0,0.565	1.0,1.0	-0.218
ENSG00000153786.12	ZDHHC7	chr16	-	84988762	84988873	84981869	84981994	84990303	84990635	155,96	181151	59,76	136209	0.00539006	0.3,0.241	0.178,0.154	0.104
ENSG00000172671.19	ZFAND4	chr10	-	45625950	45627105	45624582	45624637	45639815	45639963	4,6	0,5	17,13	0,0	0.041133	1.0,0.375	1.0,1.0	-0.313
ENSG00000184517.11	ZFP1	chr16	+	75166769	75166913	75152908	75152966	75169252	75169326	39,15	0,0	26,34	5,2	0.00808024	1.0,1.0	0.722,0.895	0.192
ENSG00000005889.15	ZFX	chrX	+	24177713	24177866	24175388	24175443	24179182	24179550	0,1	10,4	3,3	5,5	0.0437654	0.0,0.111	0.231,0.231	-0.176
ENSG00000166140.17	ZFYVE19	chr15	+	40812698	40812902	40810648	40810757	40813337	40813417	95110	1,14	71,68	17,23	0.00564176	0.979,0.797	0.676,0.596	0.252
ENSG00000108175.16	ZMIZ1	chr10	+	79310923	79311184	79307404	79307571	79312641	79316519	37,38	0,1	30,41	13,4	0.00107132	1.0,0.95	0.536,0.837	0.288
ENSG00000122515.14	ZMIZ2	chr7	+	44760150	44760228	44759280	44759460	44760424	44760593	0,0	18,12	6,11	12,22	0.000215181	0.0,0.0	0.2,0.2	-0.2
ENSG00000132950.18	ZMYM5	chr13	-	19838699	19838985	19835476	19835689	19851354	19851448	21,23	2,1	15,9	9,9	0.000958029	0.84,0.92	0.455,0.333	0.486
ENSG00000132950.18	ZMYM5	chr13	-	19862398	19862466	19851688	19852190	19863449	19863524	19,22	0,0	20,14	5,3	0.00099321	1.0,1.0	0.671,0.705	0.312
ENSG00000132950.18	ZMYM5	chr13	-	19837655	19837821	19835476	19835689	19851354	19852190	19,12	2,1	18,11	9,9	0.0200396	0.826,0.857	0.5,0.379	0.402
ENSG00000132950.18	ZMYM5	chr13	-	19838699	19838985	19837464	19837821	19851354	19851448	25,37	0,4	16,13	4,8	0.0352624	1.0,0.822	0.667,0.448	0.354
ENSG00000015171.18	ZMYND11	chr10	+	221194	221356	209888	210048	236837	236915	242292	12,17	251281	33,37	0.00920033	0.91,0.896	0.792,0.792	0.111
ENSG00000101040.19	ZMYND8	chr20	-	47220257	47220324	47209213	47210897	47221313	47221474	72103	0,0	59,52	4,4	0.00807799	1.0,1.0	0.884,0.87	0.123
ENSG00000196387.9	ZNF140	chr12	+	133081531	133081613	133081272	133081329	133083102	133083229	7,0	8,10	0,0	8,3	0.034212	0.304,0.0	0.0,0.0	0.152
ENSG00000186272.12	ZNF17	chr19	+	57417911	57418038	57413372	57413636	57419634	57421803	27,27	3,4	14,14	0,0	0.0125132	0.818,0.771	1.0,1.0	-0.206
ENSG00000147394.18	ZNF185	chrX	+	152920327	152920411	152918982	152919081	152920706	152920748	81,81	0,0	26,28	3,2	0.04026	1.0,1.0	0.813,0.875	0.156
ENSG00000147394.18	ZNF185	chrX	+	152922172	152922256	152920709	152920748	152931671	152931776	18,45	6,0	23,33	0,0	0.0408628	0.6,1.0	1.0,1.0	-0.2
ENSG00000005801.16	ZNF195	chr11	-	3360719	3360788	3357927	3360565	3370974	3371070	0,2	46,35	10,6	19,17	0.000102238	0.0,0.028	0.211,0.152	-0.167
ENSG00000005801.16	ZNF195	chr11	-	3362545	3362602	3359996	3360565	3370974	3371070	0,0	46,35	2,6	19,17	0.0115515	0.0,0.0	0.055,0.164	-0.11
ENSG00000186448.14	ZNF197	chr3	+	44630813	44630946	44629073	44629544	44631061	44631221	6,2	9,2	0,0	4,4	0.0051348	0.25,0.333	0.0,0.0	0.291
ENSG00000171606.17	ZNF274	chr19	+	58209960	58210073	58206719	58207202	58211559	58211686	41,41	6,0	43,39	0,0	0.0437654	0.774,1.0	1.0,1.0	-0.113
ENSG00000158805.11	ZNF276	chr16	+	89729930	89729963	89729234	89729318	89733301	89733537	7,1	7,22	0,0	18,22	0.0134051	0.407,0.03	0.0,0.0	0.218
ENSG00000137871.19	ZNF280D	chr15	-	56654197	56654234	56642951	56642997	56654384	56654503	28,89	4,4	81,53	1,0	0.0396188	0.822,0.936	0.982,1.0	-0.112
ENSG00000188994.12	ZNF292	chr6	+	87222769	87222894	87218647	87218731	87233324	87233527	3,3	23,58	10,8	20,23	0.00917424	0.061,0.025	0.2,0.148	-0.131
ENSG00000168661.14	ZNF30	chr19	+	34942593	34942673	34933627	34933723	34943222	34945168	8,14	0,0	27,31	4,7	0.00279144	1.0,1.0	0.771,0.689	0.27
ENSG00000213742.6	ZNF337-AS1	chr20	+	25674896	25675078	25673851	25674007	25676935	25677052	8,23	0,9	21,25	0,0	0.00804385	1.0,0.561	1.0,1.0	-0.22
ENSG00000113761.11	ZNF346	chr5	+	177050750	177050936	177044391	177044533	177064511	177064966	28,40	6,0	35,42	0,0	0.0350309	0.7,1.0	1.0,1.0	-0.15
ENSG00000169981.10	ZNF35	chr3	+	44652556	44652701	44650943	44651259	44658700	44658765	8,8	0,0	6,15	3,3	0.00205952	1.0,1.0	0.5,0.714	0.393
ENSG00000075407.17	ZNF37A	chr10	+	38094930	38095224	38094350	38094490	38095537	38095559	25,26	0,7	14,20	10,15	0.0294002	1.0,0.65	0.412,0.4	0.419
ENSG00000126746.17	ZNF384	chr12	-	6672349	6672532	6670759	6670838	6673215	6673440	26,45	25,69	28,35	95,87	0.0350762	0.342,0.246	0.128,0.167	0.147
ENSG00000160908.14	ZNF394	chr7	-	99498715	99498842	99493239	99494631	99499637	99500297	29,33	4,10	47,42	4,0	0.0458939	0.784,0.623	0.855,1.0	-0.224
ENSG00000197808.11	ZNF461	chr19	-	36643793	36643862	36638652	36640043	36656447	36656543	56,57	2,5	40,29	9,14	0.00879006	0.934,0.853	0.693,0.512	0.291
ENSG00000148143.12	ZNF462	chr9	+	106932265	106932350	106930524	106930689	106932445	106932549	4,0	22,14	4,9	10,11	0.0399458	0.083,0.0	0.167,0.29	-0.187
ENSG00000188033.9	ZNF490	chr19	-	12609869	12609974	12609157	12609202	12610563	12610803	7,1	15,5	6,8	1,4	0.0465309	0.189,0.091	0.75,0.5	-0.485
ENSG00000177853.14	ZNF518A	chr10	+	96151415	96151566	96133555	96133648	96155923	96156047	13,12	7,4	5,21	0,1	0.00254814	0.481,0.6	1.0,0.913	-0.416
ENSG00000177853.14	ZNF518A	chr10	+	96155325	96155398	96133555	96133648	96155923	96156047	27,25	7,4	21,35	0,1	0.00267246	0.659,0.758	1.0,0.946	-0.264
ENSG00000177853.14	ZNF518A	chr10	+	96155325	96155376	96133555	96133648	96155923	96156019	30,43	7,4	52,37	0,1	0.00330594	0.714,0.862	1.0,0.956	-0.19
ENSG00000177853.14	ZNF518A	chr10	+	96155325	96155398	96151408	96151566	96155923	96156047	27,25	6,0	42,40	0,0	0.0240815	0.692,1.0	1.0,1.0	-0.154
ENSG00000189042.13	ZNF567	chr19	+	36712592	36712661	36712370	36712512	36712780	36712867	8,8	11,33	0,0	18,27	0.000377859	0.269,0.11	0.0,0.0	0.19
ENSG00000189042.13	ZNF567	chr19	+	36694801	36694876	36689396	36689497	36712385	36712732	19,12	11,20	36,41	9,10	0.0314661	0.463,0.231	0.667,0.672	-0.322
ENSG00000171574.17	ZNF584	chr19	+	58410005	58410091	58408687	58409165	58415523	58415646	81,55	3,7	27,55	11,15	0.0122259	0.931,0.797	0.551,0.647	0.265
ENSG00000171574.17	ZNF584	chr19	+	58409964	58410091	58408776	58409165	58415523	58415646	53,59	3,7	28,56	11,15	0.0315024	0.898,0.808	0.56,0.651	0.247
ENSG00000166716.9	ZNF592	chr15	+	84764706	84764815	84748634	84748664	84778182	84778312	34,49	4,2	28,26	0,0	0.0431623	0.81,0.925	1.0,1.0	-0.132
ENSG00000153896.17	ZNF599	chr19	-	34772335	34772473	34769428	34769555	34772823	34773229	0,0	7,19	4,5	7,13	0.00415287	0.0,0.0	0.222,0.161	-0.192
ENSG00000168916.15	ZNF608	chr5	-	124744083	124745172	124701013	124701269	124748532	124748807	4,14	0,6	6,14	0,0	0.0166936	1.0,0.538	1.0,1.0	-0.231
ENSG00000157657.14	ZNF618	chr9	+	114016112	114016172	114008476	114008554	114016694	114016784	4,7	14,28	26,18	18,27	0.0316129	0.134,0.119	0.439,0.266	-0.226
ENSG00000075292.18	ZNF638	chr2	+	71424649	71424715	71418601	71418639	71428546	71428651	0,5	6,5	4,9	1,0	0.000608779	0.0,0.341	0.675,1.0	-0.667
ENSG00000179195.15	ZNF664	chr12	+	123988045	123988138	123973885	123974020	124011380	124011441	132179	27,36	160206	14,11	0.00176181	0.71,0.713	0.851,0.904	-0.166
ENSG00000179195.15	ZNF664	chr12	+	123988042	123988138	123973122	123974020	124011380	124011441	204211	27,36	184237	14,11	0.00928075	0.791,0.746	0.868,0.915	-0.123
ENSG00000143373.17	ZNF687	chr1	+	151283187	151283318	151282266	151282395	151286274	151288406	4,6	1,14	0,0	6,2	0.00579611	0.667,0.176	0.0,0.0	0.421
ENSG00000171163.15	ZNF692	chr1	-	248855557	248855635	248855379	248855458	248855724	248855946	66,28	6,1	24,35	0,0	0.0233592	0.846,0.933	1.0,1.0	-0.111
ENSG00000185252.17	ZNF74	chr22	+	20395332	20395418	20394402	20394662	20400631	20400758	5,10	2,5	10,12	0,0	0.000377859	0.556,0.5	1.0,1.0	-0.472
ENSG00000152443.12	ZNF776	chr19	+	57753273	57753379	57750784	57750911	57756871	57757194	0,1	3,13	4,5	4,3	0.00211312	0.0,0.037	0.333,0.455	-0.376
ENSG00000197362.13	ZNF786	chr7	-	149080590	149080717	149074385	149074538	149090622	149090705	15,7	0,0	12,25	2,5	0.00516494	1.0,1.0	0.75,0.714	0.268
ENSG00000196152.10	ZNF79	chr9	+	127428551	127428660	127424373	127424803	127428831	127428920	0,1	5,9	6,2	11,3	0.0280947	0.0,0.053	0.214,0.25	-0.205
ENSG00000162415.6	ZSWIM5	chr1	-	45051073	45051253	45043218	45043395	45058608	45058759	15,39	6,0	11,22	0,0	0.0416569	0.556,1.0	1.0,1.0	-0.222
ENSG00000162415.6	ZSWIM5	chr1	-	45040391	45040538	45038935	45039073	45051073	45051253	15,19	5,0	11,20	0,0	0.0485116	0.6,1.0	1.0,1.0	-0.2
ENSG00000203995.9	ZYG11A	chr1	+	52881470	52881665	52877924	52877969	52885832	52885894	30,17	0,0	10,20	6,0	0.0335775	1.0,1.0	0.455,1.0	0.272

## Sheet: MCF-7_CE
GENCODE_GeneID	geneSymbol	chr	strand	exonStart_0base	exonEnd	upstreamES	upstreamEE	downstreamES	downstreamEE	IJC_SAMPLE_1	SJC_SAMPLE_1	IJC_SAMPLE_2	SJC_SAMPLE_2	FDR	IncLevel1	IncLevel2	MCF-7.IncLevelDifference
ENSG00000158122.11	AAED1	chr9	-	96645892	96646024	96639576	96641886	96651389	96651495	38,39	21,20	53,51	12,9	0.0248357	0.475,0.494	0.688,0.739	-0.229
ENSG00000266967.6	AARSD1	chr17	-	42954875	42954967	42951799	42951894	42955157	42955261	20,9	3,1	34,36	0,0	0.0401699	0.769,0.818	1.0,1.0	-0.207
ENSG00000154265.15	ABCA5	chr17	-	69251746	69251866	69250471	69250621	69253572	69253667	94141	40,60	166192	10,10	1.39696e-13	0.54,0.54	0.892,0.906	-0.359
ENSG00000154265.15	ABCA5	chr17	-	69251775	69251866	69250471	69250621	69253572	69253667	25,61	40,60	61100	10,10	4.17971e-12	0.238,0.337	0.753,0.833	-0.505
ENSG00000131269.15	ABCB7	chrX	-	75112885	75112972	75098941	75099061	75156104	75156282	48,67	7,2	35,53	0,0	0.00480613	0.774,0.944	1.0,1.0	-0.141
ENSG00000101986.11	ABCD1	chrX	+	153736761	153736911	153736344	153736513	153737156	153737251	0,0	12,9	6,1	14,16	0.0244243	0.0,0.0	0.176,0.03	-0.103
ENSG00000119688.20	ABCD4	chr14	-	74299547	74299675	74297929	74298069	74302874	74302992	3,1	0,0	18,3	6,0	0.00738937	1.0,1.0	0.6,1.0	0.2
ENSG00000119688.20	ABCD4	chr14	-	74295147	74295198	74293153	74293248	74295853	74295979	23,13	3,2	58,27	0,0	0.0153396	0.817,0.791	1.0,1.0	-0.196
ENSG00000119688.20	ABCD4	chr14	-	74293153	74293310	74292747	74292869	74295147	74295198	5,1	5,2	10,16	3,0	0.0233644	0.333,0.2	0.625,1.0	-0.546
ENSG00000119688.20	ABCD4	chr14	-	74293153	74293279	74292747	74292869	74295147	74295198	5,1	5,2	10,16	3,0	0.0233644	0.333,0.2	0.625,1.0	-0.546
ENSG00000119688.20	ABCD4	chr14	-	74293153	74293248	74292747	74292869	74295147	74295198	17,9	5,2	48,33	3,0	0.0295412	0.63,0.692	0.889,1.0	-0.283
ENSG00000106077.18	ABHD11	chr7	-	73736914	73736990	73736093	73736691	73737561	73737735	0,0	2,8	1,5	2,11	0.0216171	0.0,0.0	0.2,0.185	-0.193
ENSG00000106077.18	ABHD11	chr7	-	73737068	73737220	73736093	73736691	73737561	73737735	4,0	2,8	28,24	2,11	0.0318366	0.5,0.0	0.875,0.522	-0.449
ENSG00000100997.18	ABHD12	chr20	-	25320198	25320318	25309445	25309575	25323324	25323430	147124	2,19	216176	1,1	0.000190051	0.974,0.765	0.991,0.989	-0.121
ENSG00000164074.14	ABHD18	chr4	+	127989720	127989821	127984338	127984423	128020079	128020169	18,16	5,0	17,17	0,0	0.0297247	0.643,1.0	1.0,1.0	-0.178
ENSG00000158201.9	ABHD3	chr18	-	21683919	21683965	21663677	21664230	21702315	21702498	17,8	0,0	70,46	8,2	0.0148936	1.0,1.0	0.842,0.933	0.113
ENSG00000136754.16	ABI1	chr10	-	26759061	26759238	26751597	26751783	26765217	26765318	218280	25,42	179166	70,33	0.0332632	0.813,0.769	0.561,0.716	0.152
ENSG00000143322.19	ABL2	chr1	-	179117331	179117516	179114877	179115030	179118586	179118764	17,10	5,0	20,14	0,0	0.0231981	0.63,1.0	1.0,1.0	-0.185
ENSG00000244055.1	AC007566.10	chr7	+	92462957	92463026	92461318	92461410	92491242	92491610	17,4	6,2	7,7	0,0	0.000355089	0.59,0.504	1.0,1.0	-0.453
ENSG00000214135.8	AC024560.3	chr3	-	197622186	197622330	197621703	197621868	197623219	197623382	55,46	1,8	54,82	1,0	0.00800472	0.965,0.742	0.964,1.0	-0.129
ENSG00000152117.17	AC093838.4	chr2	+	131519813	131519942	131519534	131519666	131520096	131520421	4,19	20,14	3,5	55,52	0.00424174	0.091,0.404	0.027,0.046	0.211
ENSG00000278540.4	ACACA	chr17	-	37289417	37289528	37284837	37284970	37330172	37330425	15,8	5,1	6,1	9,2	0.0330083	0.6,0.8	0.25,0.2	0.475
ENSG00000111271.14	ACAD10	chr12	+	111710272	111710437	111709525	111709684	111715820	111715962	16,24	0,0	29,10	7,2	0.000316277	1.0,1.0	0.674,0.714	0.306
ENSG00000111271.14	ACAD10	chr12	+	111712497	111712657	111709525	111709684	111715820	111715962	41,30	0,0	63,41	7,2	0.00390293	1.0,1.0	0.818,0.911	0.135
ENSG00000111271.14	ACAD10	chr12	+	111712497	111712657	111710272	111710437	111715820	111715962	43,29	8,6	54,41	4,0	0.0273879	0.729,0.707	0.871,1.0	-0.218
ENSG00000107897.18	ACBD5	chr10	-	27223206	27223239	27219722	27219857	27223337	27223452	19,19	181156	34,42	54,80	4.88366e-09	0.067,0.077	0.302,0.265	-0.211
ENSG00000230124.6	ACBD6	chr1	-	180495460	180495525	180430179	180430262	180502044	180502954	28,31	10,12	57,80	2,6	0.000318148	0.594,0.574	0.937,0.874	-0.322
ENSG00000078124.11	ACER3	chr11	+	76981796	76981922	76976288	76976341	76985642	76985724	0,0	10,2	2,5	14,5	0.0124363	0.0,0.0	0.067,0.333	-0.2
ENSG00000100813.14	ACIN1	chr14	-	23065965	23066101	23064354	23064488	23069475	23069617	134109	7,10	167185	0,1	4.07012e-05	0.905,0.845	1.0,0.989	-0.119
ENSG00000100813.14	ACIN1	chr14	-	23065965	23065978	23064354	23064488	23069475	23069617	11,2	7,10	10,7	0,1	0.000304517	0.573,0.146	1.0,0.857	-0.569
ENSG00000100813.14	ACIN1	chr14	-	23067313	23068671	23064354	23064488	23069475	23069525	2,11	7,10	1,5	0,1	0.0106951	0.125,0.355	1.0,0.714	-0.617
ENSG00000100813.14	ACIN1	chr14	-	23071124	23071186	23069475	23069617	23071433	23071617	12,4	0,0	30,20	1,4	0.0389605	1.0,1.0	0.941,0.728	0.165
ENSG00000161533.11	ACOX1	chr17	-	75960214	75960375	75957458	75957566	75978533	75978693	41,27	7,1	117,94	0,3	0.0225958	0.745,0.931	1.0,0.94	-0.132
ENSG00000087008.15	ACOX3	chr4	-	8373560	8373628	8370907	8370994	8374977	8375152	31,17	1,0	54,31	5,4	0.0228452	0.941,1.0	0.847,0.798	0.148
ENSG00000143727.15	ACP1	chr2	+	272036	272065	271865	271939	272191	272305	141252	43,43	174205	69113	0.00723712	0.701,0.807	0.643,0.564	0.151
ENSG00000123983.13	ACSL3	chr2	+	222900673	222900780	222887829	222887888	222908732	222909150	62,65	37,57	147123	55,46	0.026945	0.456,0.363	0.572,0.572	-0.162
ENSG00000123983.13	ACSL3	chr2	+	222900673	222900780	222860933	222861258	222908732	222909150	45,46	9,13	101101	3,12	0.0290762	0.714,0.639	0.944,0.808	-0.2
ENSG00000131069.19	ACSS2	chr20	+	34921962	34921992	34921647	34921866	34923322	34923431	13,3	21,25	0,0	34,17	0.000178436	0.304,0.078	0.0,0.0	0.191
ENSG00000133627.17	ACTR3B	chr7	+	152811696	152811733	152801620	152801731	152814549	152814645	0,2	31,15	4,9	26,20	0.01098	0.0,0.081	0.092,0.229	-0.12
ENSG00000143537.13	ADAM15	chr1	+	155061417	155061489	155060762	155060832	155062244	155062369	43,9	83,85	39,36	44,39	0.00215596	0.206,0.05	0.307,0.316	-0.183
ENSG00000143537.13	ADAM15	chr1	+	155061414	155061489	155060762	155060832	155062244	155062369	36,7	83,85	30,33	44,39	0.00229607	0.178,0.04	0.254,0.297	-0.166
ENSG00000008277.14	ADAM22	chr7	+	88134328	88134419	88132866	88132951	88135979	88136031	9,9	7,0	33,54	0,1	0.0280576	0.391,1.0	1.0,0.964	-0.286
ENSG00000008277.14	ADAM22	chr7	+	88186614	88186701	88181957	88182024	88193115	88193239	1,0	5,6	5,5	14,14	0.0437706	0.091,0.0	0.152,0.152	-0.106
ENSG00000185761.10	ADAMTSL5	chr19	-	1510367	1510428	1510149	1510258	1510638	1510733	2,12	0,0	15,17	2,3	0.0228372	1.0,1.0	0.802,0.753	0.222
ENSG00000063761.15	ADCK1	chr14	+	77907802	77907919	77899099	77899258	77924456	77924606	3,1	0,0	26,11	3,4	0.00240435	1.0,1.0	0.813,0.579	0.304
ENSG00000173137.11	ADCK5	chr8	+	144392091	144392170	144391976	144392022	144392253	144392345	5,7	3,1	17,16	0,0	0.0149211	0.455,0.778	1.0,1.0	-0.383
ENSG00000174233.11	ADCY6	chr12	-	48774690	48774778	48774401	48774518	48775302	48775450	6,9	0,0	29,13	10,0	0.00708812	1.0,1.0	0.592,1.0	0.204
ENSG00000072071.16	ADGRL1	chr19	-	14160592	14160696	14160111	14160297	14161311	14161626	7,8	6,8	26,23	3,0	0.000157164	0.368,0.333	0.813,1.0	-0.556
ENSG00000072071.16	ADGRL1	chr19	-	14152132	14152222	14151207	14151615	14152308	14152437	24,14	3,3	10,16	0,0	0.00448832	0.8,0.7	1.0,1.0	-0.25
ENSG00000072071.16	ADGRL1	chr19	-	14152132	14152150	14149952	14151615	14152308	14152437	11,9	3,3	12,10	0,0	0.00500113	0.747,0.707	1.0,1.0	-0.273
ENSG00000159322.17	ADPGK	chr15	-	72771782	72771845	72760406	72760527	72783245	72783628	18,29	0,0	40,36	5,2	0.00879353	1.0,1.0	0.809,0.905	0.143
ENSG00000223959.8	AFG3L1P	chr16	+	89977604	89977802	89972616	89972765	89978809	89978878	15,5	1,0	14,16	6,5	0.00449114	0.882,1.0	0.538,0.615	0.365
ENSG00000223959.8	AFG3L1P	chr16	+	89977714	89977802	89972616	89972765	89978809	89978878	16,5	1,0	15,21	6,5	0.00709676	0.889,1.0	0.556,0.677	0.328
ENSG00000223959.8	AFG3L1P	chr16	+	89977677	89977802	89972592	89972765	89978809	89978878	15,5	1,0	20,17	6,5	0.00870989	0.882,1.0	0.625,0.63	0.314
ENSG00000223959.8	AFG3L1P	chr16	+	89977638	89977802	89972585	89972765	89978809	89978878	24,12	1,0	24,41	6,5	0.00956299	0.923,1.0	0.667,0.804	0.226
ENSG00000165923.15	AGBL2	chr11	-	47699445	47699553	47692102	47692256	47704542	47704728	3,5	0,0	6,15	3,2	0.00381427	1.0,1.0	0.5,0.789	0.355
ENSG00000106351.12	AGFG2	chr7	+	100556593	100556626	100555666	100555735	100562258	100562379	0,0	33,7	10,3	39,27	0.00232282	0.0,0.0	0.15,0.071	-0.11
ENSG00000164252.12	AGGF1	chr5	+	77048166	77048272	77046346	77046677	77048935	77048987	57,59	6,1	63,54	0,0	0.0154909	0.826,0.967	1.0,1.0	-0.104
ENSG00000162688.15	AGL	chr1	+	99879922	99880046	99877640	99877828	99880631	99880795	16,7	10,0	53,29	0,0	0.00498754	0.444,1.0	1.0,1.0	-0.278
ENSG00000204310.10	AGPAT1	chr6	-	32170936	32171070	32170424	32170600	32171249	32171505	25,35	0,0	46,44	4,3	0.0172191	1.0,1.0	0.852,0.88	0.134
ENSG00000155189.11	AGPAT5	chr8	+	6724869	6724939	6708356	6708887	6730710	6730743	33,42	2,7	43,38	0,0	0.001291	0.893,0.751	1.0,1.0	-0.178
ENSG00000135049.15	AGTPBP1	chr9	-	85660935	85660973	85657434	85657643	85669484	85669578	1,9	19,25	18,44	4,4	9.48631e-11	0.033,0.191	0.746,0.878	-0.7
ENSG00000135049.15	AGTPBP1	chr9	-	85678334	85678398	85677435	85677582	85681267	85681335	43,74	5,11	57,91	2,1	0.0031063	0.819,0.78	0.938,0.98	-0.159
ENSG00000153207.14	AHCTF1	chr1	-	246843794	246843928	246842693	246842776	246849614	246851442	115113	18,7	135117	0,3	0.000151458	0.762,0.89	1.0,0.951	-0.149
ENSG00000153207.14	AHCTF1	chr1	-	246843794	246843928	246839097	246840998	246849614	246851442	21,25	0,5	30,18	0,0	0.041526	1.0,0.714	1.0,1.0	-0.143
ENSG00000135541.20	AHI1	chr6	-	135297431	135297492	135285294	135285647	135300499	135300532	1,0	30,34	9,0	9,13	0.0099847	0.018,0.0	0.35,0.0	-0.166
ENSG00000173209.22	AHSA2	chr2	+	61183546	61183662	61181319	61181405	61184711	61184800	18,14	169178	83,45	195161	1.51666e-07	0.051,0.038	0.175,0.123	-0.104
ENSG00000023516.8	AKAP11	chr13	+	42313046	42313130	42308453	42308609	42313893	42313940	48,22	95,83	85,71	45,74	0.000318148	0.202,0.117	0.486,0.324	-0.246
ENSG00000118507.15	AKAP7	chr6	+	131199460	131199573	131169112	131169273	131219660	131219808	0,3	4,1	4,21	1,0	0.000890642	0.0,0.6	0.667,1.0	-0.534
ENSG00000011243.17	AKAP8L	chr19	-	15398629	15398766	15397713	15397855	15399301	15399410	2,3	104,95	17,20	87,62	6.37916e-07	0.01,0.016	0.089,0.139	-0.101
ENSG00000011243.17	AKAP8L	chr19	-	15403474	15403555	15397519	15397625	15403657	15403715	21,13	6,1	15,39	0,0	0.00118235	0.636,0.867	1.0,1.0	-0.248
ENSG00000117448.13	AKR1A1	chr1	+	45568484	45568684	45568146	45568177	45568926	45569006	87125	9,17	196221	5,7	0.00145358	0.829,0.786	0.951,0.94	-0.138
ENSG00000117448.13	AKR1A1	chr1	+	45568536	45568684	45568146	45568177	45568926	45569006	43,56	9,17	90,80	5,7	0.00733562	0.705,0.622	0.9,0.851	-0.212
ENSG00000151632.16	AKR1C2	chr10	-	4999199	4999273	4998624	4998747	5000549	5000666	194108	6,16	284458	2,6	0.000318148	0.942,0.771	0.986,0.974	-0.123
ENSG00000151632.16	AKR1C2	chr10	-	4999185	4999277	4998624	4998747	5000549	5000666	95,43	6,16	126193	2,6	0.0060684	0.888,0.573	0.969,0.941	-0.225
ENSG00000259977.1	AL121578.2	chrX	+	37906801	37906908	37906146	37906609	37939581	37939689	1,3	5,10	12,10	7,3	0.00596091	0.091,0.13	0.462,0.625	-0.433
ENSG00000072210.18	ALDH3A2	chr17	+	19655280	19655387	19652546	19652632	19656365	19656574	0,0	8,14	8,12	42,41	0.0036074	0.0,0.0	0.087,0.128	-0.107
ENSG00000006534.15	ALDH3B1	chr11	+	68019714	68019796	68019065	68019255	68021484	68021852	13,16	5,4	5,11	0,0	0.000383583	0.565,0.667	1.0,1.0	-0.384
ENSG00000253710.2	ALG11	chr13	+	52023712	52023779	52018912	52019143	52024005	52024937	0,0	19,9	5,5	8,10	0.000466132	0.0,0.0	0.243,0.205	-0.224
ENSG00000101901.10	ALG13	chrX	+	111721602	111721711	111720094	111720170	111722792	111722857	8,9	14,5	14,29	3,3	0.00703606	0.222,0.474	0.7,0.829	-0.416
ENSG00000101901.10	ALG13	chrX	+	111722792	111722857	111720094	111720170	111723797	111723898	14,11	6,0	4,11	0,0	0.0140802	0.549,1.0	1.0,1.0	-0.226
ENSG00000101901.10	ALG13	chrX	+	111721602	111721711	111720094	111720170	111723797	111723881	2,4	6,0	8,23	0,0	0.032713	0.143,1.0	1.0,1.0	-0.428
ENSG00000172339.9	ALG14	chr1	-	94983548	94983633	94974406	94983306	95027128	95027203	10,0	15,6	0,2	21,19	0.0243611	0.25,0.0	0.0,0.05	0.1
ENSG00000239382.10	ALKBH6	chr19	-	36013513	36013588	36013343	36013422	36014174	36014227	9,17	1,0	8,9	8,3	0.000810679	0.818,1.0	0.333,0.6	0.443
ENSG00000262943.7	ALOX12P2	chr17	+	6896553	6896763	6896315	6896459	6898203	6898290	41,59	0,0	51,45	3,3	0.030225	1.0,1.0	0.895,0.882	0.111
ENSG00000003393.14	ALS2	chr2	-	201765652	201765827	201760880	201761818	201767228	201767383	0,0	22,20	4,4	30,11	0.0210147	0.0,0.0	0.063,0.154	-0.108
ENSG00000178038.16	ALS2CL	chr3	-	46683133	46683326	46682028	46682094	46683781	46683848	0,1	8,8	5,4	5,1	0.00110959	0.0,0.059	0.333,0.667	-0.471
ENSG00000178038.16	ALS2CL	chr3	-	46685524	46685644	46683988	46684047	46686307	46686439	0,9	3,1	16,6	0,0	0.00406801	0.0,0.818	1.0,1.0	-0.591
ENSG00000110497.14	AMBRA1	chr11	-	46512726	46512813	46508190	46508370	46541944	46543398	28,28	24,23	39,48	15,15	0.0358775	0.368,0.378	0.565,0.615	-0.217
ENSG00000139211.6	AMIGO2	chr12	-	47079146	47079248	47076599	47079065	47079461	47079951	15911044	421467	8521081	456687	0.0225658	0.654,0.528	0.483,0.44	0.129
ENSG00000139211.6	AMIGO2	chr12	-	47079141	47079248	47076497	47079065	47079461	47079642	20261346	421467	11311466	456687	0.0282573	0.706,0.59	0.554,0.516	0.113
ENSG00000144233.9	AMMECR1L	chr2	-	127867144	127867279	127866899	127866996	127869453	127869544	23,22	9,10	10,0	22,22	8.06366e-06	0.561,0.524	0.185,0.0	0.45
ENSG00000166025.17	AMOTL1	chr11	+	94796965	94797020	94795010	94795160	94799389	94799539	8,0	9,8	0,1	37,30	0.00833007	0.334,0.0	0.0,0.018	0.158
ENSG00000116337.15	AMPD2	chr1	+	109628642	109628806	109628363	109628495	109629108	109629235	89,77	14,9	96,41	0,0	2.56853e-06	0.761,0.811	1.0,1.0	-0.214
ENSG00000214174.8	AMZ2P1	chr17	-	64973241	64973352	64972753	64972927	64974554	64975568	62,82	1,0	40,51	5,3	0.00731921	0.969,1.0	0.8,0.895	0.137
ENSG00000214174.8	AMZ2P1	chr17	-	64973241	64973517	64972753	64972927	64974554	64975568	79106	1,0	56,61	5,3	0.00994356	0.975,1.0	0.848,0.91	0.109
ENSG00000153107.11	ANAPC1	chr2	-	111847137	111847198	111843411	111843599	111847724	111847865	37,25	3,2	50,43	0,0	0.0419093	0.869,0.871	1.0,1.0	-0.13
ENSG00000164162.12	ANAPC10	chr4	-	145064571	145064692	144994574	144995603	145081659	145081750	72,75	0,3	129114	9,11	0.0243826	1.0,0.926	0.878,0.838	0.105
ENSG00000141552.17	ANAPC11	chr17	+	81893551	81893614	81891722	81891841	81894466	81894586	149193	4,11	206156	35,20	0.000601057	0.952,0.903	0.757,0.805	0.146
ENSG00000144504.15	ANKMY1	chr2	-	240529036	240529509	240525684	240525849	240560730	240560776	10,10	1,4	9,8	0,0	0.00423874	0.833,0.556	1.0,1.0	-0.305
ENSG00000088448.14	ANKRD10	chr13	-	110900529	110900661	110892956	110893263	110906032	110906124	5,21	104,81	10,28	20,12	0.00147951	0.023,0.115	0.2,0.538	-0.3
ENSG00000088448.14	ANKRD10	chr13	-	110894108	110894202	110892691	110893263	110906032	110906124	7,16	104,81	7,11	20,12	0.0123606	0.033,0.09	0.149,0.314	-0.17
ENSG00000167522.14	ANKRD11	chr16	-	89291680	89291777	89291012	89291183	89305205	89305344	3,4	34,56	6,28	24,48	0.00059267	0.042,0.034	0.111,0.226	-0.131
ENSG00000167522.14	ANKRD11	chr16	-	89291680	89291799	89291012	89291183	89305205	89305344	3,3	34,56	5,26	24,48	0.000697787	0.042,0.026	0.094,0.213	-0.119
ENSG00000167522.14	ANKRD11	chr16	-	89279071	89285649	89275092	89275191	89286038	89286186	88,33	0,8	33,49	0,1	0.047045	1.0,0.673	1.0,0.961	-0.144
ENSG00000107890.16	ANKRD26	chr10	-	27061164	27061242	27060511	27060540	27063987	27064081	19,10	0,0	28,13	5,2	0.00292813	1.0,1.0	0.737,0.765	0.249
ENSG00000107890.16	ANKRD26	chr10	-	27061168	27061242	27060511	27060540	27063987	27064081	19,16	0,0	30,14	5,2	0.00322584	1.0,1.0	0.75,0.778	0.236
ENSG00000107890.16	ANKRD26	chr10	-	27061143	27061242	27060511	27060540	27063987	27064081	22,12	0,0	41,26	5,2	0.010469	1.0,1.0	0.804,0.867	0.164
ENSG00000135976.16	ANKRD36	chr2	+	97122886	97122993	97118343	97118517	97127066	97127134	7,8	4,4	19,7	1,0	0.00115725	0.467,0.5	0.905,1.0	-0.469
ENSG00000196912.12	ANKRD36B	chr2	-	97576378	97576446	97560831	97560860	97578905	97579043	0,7	5,10	6,3	1,1	0.0262958	0.0,0.263	0.754,0.605	-0.548
ENSG00000174501.14	ANKRD36C	chr2	-	95867439	95867581	95859860	95860074	95876438	95876509	14,6	1,0	7,3	2,5	0.0028303	0.875,1.0	0.636,0.231	0.504
ENSG00000168876.8	ANKRD49	chr11	+	94497901	94497964	94496603	94496951	94498070	94498214	16,29	18,17	21,19	34,61	0.0321017	0.32,0.475	0.247,0.142	0.203
ENSG00000165138.17	ANKS6	chr9	-	98790103	98790606	98784831	98784876	98796132	98796539	30,17	1,0	21,43	3,9	0.0026648	0.938,1.0	0.778,0.705	0.227
ENSG00000185101.12	ANO9	chr11	-	423941	424187	421140	421198	428087	428199	5,8	24,27	0,1	11,21	0.00932745	0.094,0.129	0.0,0.023	0.1
ENSG00000185101.12	ANO9	chr11	-	428087	428137	421140	421198	428357	428394	9,19	5,0	2,17	0,0	0.0377396	0.514,1.0	1.0,1.0	-0.243
ENSG00000213983.11	AP1G2	chr14	-	23563199	23563302	23562503	23562593	23563379	23563502	11,9	20,28	0,3	39,51	3.41725e-05	0.216,0.138	0.0,0.029	0.162
ENSG00000065000.15	AP3D1	chr19	-	2112859	2113413	2111790	2111828	2114124	2114239	87,96	13,0	121123	1,0	0.00313806	0.77,1.0	0.984,1.0	-0.107
ENSG00000065000.15	AP3D1	chr19	-	2113335	2113413	2111678	2111828	2114124	2114302	35,48	13,0	64,48	1,0	0.0115773	0.574,1.0	0.97,1.0	-0.198
ENSG00000157823.16	AP3S2	chr15	-	89878264	89878300	89877305	89877424	89888520	89888632	5,14	38,23	4,4	48,65	0.0271211	0.081,0.289	0.053,0.039	0.139
ENSG00000134262.12	AP4B1	chr1	-	113899124	113899352	113898717	113898801	113899903	113900024	7,3	14,6	0,1	73,61	3.16341e-05	0.2,0.2	0.0,0.008	0.196
ENSG00000120868.13	APAF1	chr12	+	98703370	98703499	98699407	98699569	98706484	98706610	55,30	44,49	62,35	15,17	0.0114227	0.385,0.234	0.674,0.507	-0.281
ENSG00000163697.16	APBB2	chr4	-	41033235	41033304	41014387	41014398	41100638	41100750	40,60	13,6	46,79	1,4	0.0225616	0.609,0.835	0.959,0.909	-0.212
ENSG00000164062.12	APEH	chr3	+	49679592	49679644	49678851	49678949	49680540	49680629	61,69	3,7	256259	3,0	0.00110891	0.922,0.851	0.98,1.0	-0.103
ENSG00000164062.12	APEH	chr3	+	49676386	49676515	49676055	49676219	49676608	49676700	28,20	0,1	89,98	7,10	0.0188175	1.0,0.909	0.864,0.831	0.107
ENSG00000117362.12	APH1A	chr1	-	150267956	150268127	150267715	150267789	150268697	150268999	358452	47,20	552477	4,7	3.176e-08	0.792,0.919	0.986,0.971	-0.123
ENSG00000117362.12	APH1A	chr1	-	150267956	150267991	150267715	150267789	150268697	150269209	208200	47,20	229217	4,7	7.03122e-07	0.749,0.871	0.975,0.954	-0.154
ENSG00000117362.12	APH1A	chr1	-	150267715	150267785	150267369	150267478	150268697	150269303	148166	35,21	261241	19,11	0.00208467	0.68,0.799	0.874,0.917	-0.156
ENSG00000117362.12	APH1A	chr1	-	150267715	150267789	150267369	150267478	150268697	150269023	193186	35,21	265248	19,11	0.00651887	0.734,0.816	0.875,0.919	-0.122
ENSG00000166181.12	API5	chr11	+	43326506	43326611	43323429	43323636	43327788	43327878	122116	16,9	342333	11,5	0.000706274	0.792,0.866	0.94,0.971	-0.127
ENSG00000166181.12	API5	chr11	+	43326508	43326611	43323429	43323636	43327788	43327878	101,83	16,9	246247	11,5	0.00116395	0.759,0.822	0.918,0.961	-0.149
ENSG00000084234.16	APLP2	chr11	+	130135529	130135715	130133628	130133728	130140397	130140483	231225	8,3	277273	20,33	0.000293139	0.935,0.974	0.874,0.805	0.115
ENSG00000084234.16	APLP2	chr11	+	130123611	130123779	130122304	130122513	130126699	130126830	465412	89,64	443499	138136	0.0102686	0.723,0.763	0.616,0.647	0.112
ENSG00000155008.13	APOOL	chrX	+	85055826	85055925	85054343	85054398	85067126	85067218	28,28	0,0	47,36	0,6	0.0294768	1.0,1.0	1.0,0.75	0.125
ENSG00000256053.7	APOPT1	chr14	+	103579370	103579491	103571753	103571820	103587273	103587364	2,10	49,52	15,19	14,10	2.57802e-07	0.02,0.088	0.349,0.487	-0.364
ENSG00000256053.7	APOPT1	chr14	+	103571622	103571820	103562981	103563124	103587273	103587364	106103	24,21	46,58	25,25	0.0241585	0.688,0.71	0.479,0.537	0.191
ENSG00000136044.11	APPL2	chr12	-	105176913	105177016	105176034	105176082	105177225	105177262	69,42	1,0	61,74	14,3	0.0012291	0.972,1.0	0.685,0.925	0.181
ENSG00000136044.11	APPL2	chr12	-	105176875	105177016	105176034	105176082	105177225	105177262	106,82	1,0	121138	14,3	0.00178211	0.981,1.0	0.812,0.958	0.105
ENSG00000078061.12	ARAF	chrX	+	47566623	47566780	47565251	47565350	47566883	47566911	10,19	8,0	44,42	0,0	0.0136486	0.385,1.0	1.0,1.0	-0.307
ENSG00000078061.12	ARAF	chrX	+	47566688	47566780	47565251	47565350	47566883	47566911	10,20	8,0	43,42	0,0	0.0140997	0.385,1.0	1.0,1.0	-0.307
ENSG00000119682.16	AREL1	chr14	-	74684483	74684680	74683295	74683533	74685599	74685660	18,23	6,4	49,37	0,2	0.00233099	0.6,0.742	1.0,0.902	-0.28
ENSG00000119682.16	AREL1	chr14	-	74684453	74684680	74683295	74683533	74685599	74685646	56,40	6,4	104,86	0,2	0.00313806	0.824,0.833	1.0,0.956	-0.149
ENSG00000149182.14	ARFGAP2	chr11	-	47172280	47172333	47171663	47171800	47175014	47175098	16,41	7,6	159107	1,2	2.45773e-05	0.567,0.797	0.989,0.968	-0.296
ENSG00000149182.14	ARFGAP2	chr11	-	47175850	47175923	47171663	47171800	47176515	47176634	18,18	4,4	81,73	0,2	0.000875389	0.692,0.692	1.0,0.948	-0.282
ENSG00000149182.14	ARFGAP2	chr11	-	47173758	47173882	47173425	47173482	47175014	47175098	46,46	4,4	272199	0,2	0.00135489	0.852,0.852	1.0,0.98	-0.138
ENSG00000149182.14	ARFGAP2	chr11	-	47173758	47173915	47173425	47173482	47175014	47175098	46,46	4,4	259197	0,2	0.00145185	0.852,0.852	1.0,0.98	-0.138
ENSG00000149182.14	ARFGAP2	chr11	-	47173758	47173885	47173097	47173482	47175014	47175098	46,46	4,4	258198	0,2	0.00145188	0.852,0.852	1.0,0.98	-0.138
ENSG00000149182.14	ARFGAP2	chr11	-	47173762	47173840	47173425	47173482	47175014	47175098	54,34	4,4	174166	0,2	0.00237295	0.871,0.81	1.0,0.976	-0.147
ENSG00000149182.14	ARFGAP2	chr11	-	47173758	47173840	47172280	47172333	47175014	47175098	55,34	1,8	174166	2,0	0.00241652	0.965,0.68	0.978,1.0	-0.166
ENSG00000149182.14	ARFGAP2	chr11	-	47172709	47172733	47172280	47172333	47173425	47173482	0,1	5,2	17,15	28,14	0.0119946	0.0,0.273	0.314,0.446	-0.243
ENSG00000124198.8	ARFGEF2	chr20	+	48974765	48974874	48973144	48973284	48976015	48976155	244294	21,35	291285	2,9	2.22291e-06	0.853,0.808	0.986,0.941	-0.133
ENSG00000124198.8	ARFGEF2	chr20	+	48974765	48974842	48973144	48973284	48976015	48976199	98109	21,35	98100	2,9	0.000158881	0.7,0.609	0.961,0.847	-0.249
ENSG00000124198.8	ARFGEF2	chr20	+	48941863	48941987	48921889	48922010	48951322	48951469	106,61	11,21	138,83	4,7	0.0215931	0.828,0.592	0.945,0.856	-0.191
ENSG00000101246.19	ARFRP1	chr20	-	63701829	63701900	63700601	63700702	63702135	63702217	40,15	10,4	97137	1,10	0.00530662	0.667,0.652	0.98,0.873	-0.267
ENSG00000101246.19	ARFRP1	chr20	-	63701829	63701895	63699477	63700702	63702135	63702217	34,10	10,4	62,95	1,10	0.0172851	0.638,0.565	0.97,0.831	-0.299
ENSG00000101246.19	ARFRP1	chr20	-	63701829	63701898	63699511	63700702	63702135	63706053	37,9	10,4	66,98	1,10	0.0205491	0.652,0.533	0.971,0.833	-0.309
ENSG00000134884.13	ARGLU1	chr13	-	106557558	106557616	106557105	106557131	106559431	106559657	21,9	49,60	4,15	159171	0.000329433	0.191,0.076	0.014,0.046	0.104
ENSG00000165322.17	ARHGAP12	chr10	-	31854065	31854206	31852516	31852597	31861394	31861658	224201	88109	108,96	143,99	5.80256e-06	0.56,0.48	0.274,0.327	0.22
ENSG00000140750.16	ARHGAP17	chr16	-	24939363	24939597	24935469	24935639	24941986	24942143	12,7	1,1	16,12	11,7	0.0227517	0.857,0.778	0.421,0.462	0.376
ENSG00000134909.18	ARHGAP32	chr11	-	129123887	129123929	129123445	129123530	129124802	129124894	24,33	7,7	28,20	1,0	0.000767218	0.684,0.748	0.946,1.0	-0.257
ENSG00000134909.18	ARHGAP32	chr11	-	129040927	129041009	128998318	128998468	129062279	129062357	15,22	2,3	10,3	0,0	0.027085	0.789,0.786	1.0,1.0	-0.212
ENSG00000006740.16	ARHGAP44	chr17	+	12987100	12987152	12984530	12984908	12990031	12990584	2,2	49,17	3,14	16,6	0.0122971	0.023,0.064	0.098,0.574	-0.292
ENSG00000076928.17	ARHGEF1	chr19	+	41906456	41906620	41905938	41906025	41906702	41906803	67,35	0,1	97,80	15,4	0.00141476	1.0,0.946	0.764,0.909	0.136
ENSG00000076928.17	ARHGEF1	chr19	+	41905177	41905261	41904948	41905036	41905759	41905827	32,21	12,5	59,50	7,3	0.0476807	0.571,0.677	0.808,0.893	-0.227
ENSG00000104728.15	ARHGEF10	chr8	+	1880047	1880164	1876570	1876734	1882634	1882749	30,53	51,55	5,1	13,22	0.00502174	0.227,0.325	0.161,0.022	0.185
ENSG00000074964.16	ARHGEF10L	chr1	+	17625955	17626048	17624386	17624503	17627329	17627503	100,64	11,1	112,87	0,0	0.000836276	0.82,0.97	1.0,1.0	-0.105
ENSG00000074964.16	ARHGEF10L	chr1	+	17634547	17634562	17632320	17632466	17634834	17635016	30,11	3,6	38,21	1,0	0.00410738	0.893,0.604	0.969,1.0	-0.236
ENSG00000132694.18	ARHGEF11	chr1	-	156971696	156971816	156969997	156970043	156976982	156977054	26,15	23,18	75,78	25,38	0.0275764	0.361,0.294	0.6,0.506	-0.225
ENSG00000116584.17	ARHGEF2	chr1	-	155965630	155965760	155965323	155965412	155966415	155966479	35,30	5,1	27,33	0,0	0.0128143	0.778,0.938	1.0,1.0	-0.142
ENSG00000116584.17	ARHGEF2	chr1	-	155966819	155966887	155966415	155966479	155969155	155969300	57,37	11,11	54,62	1,6	0.0209772	0.726,0.632	0.965,0.841	-0.224
ENSG00000114790.12	ARHGEF26	chr3	+	154187073	154187169	154152771	154152932	154187684	154187837	1,10	11,7	0,2	28,31	0.0055032	0.043,0.417	0.0,0.031	0.214
ENSG00000032219.18	ARID4A	chr14	+	58366023	58366068	58365517	58365622	58366882	58367029	31,33	3,0	33,25	6,6	0.0468648	0.864,1.0	0.772,0.719	0.186
ENSG00000169379.15	ARL13B	chr3	+	94003658	94003908	93995873	93995944	94035330	94035436	4,7	0,0	38,37	1,5	0.020063	1.0,1.0	0.95,0.787	0.131
ENSG00000214087.8	ARL16	chr17	-	81682490	81682675	81682033	81682149	81683012	81683126	29,20	0,2	22,20	12,9	0.000176135	1.0,0.833	0.478,0.526	0.414
ENSG00000214087.8	ARL16	chr17	-	81682442	81682675	81682033	81682149	81683012	81683126	23,14	0,2	16,18	12,9	0.000702535	1.0,0.778	0.4,0.5	0.439
ENSG00000213465.7	ARL2	chr11	+	65020418	65020499	65018570	65018733	65021720	65021888	88,84	6,9	140107	1,1	0.000417097	0.88,0.824	0.986,0.982	-0.132
ENSG00000165997.4	ARL5B	chr10	+	18672621	18672705	18668529	18668677	18673983	18674135	231255	28,18	139157	5,4	0.00977655	0.805,0.876	0.933,0.952	-0.102
ENSG00000165997.4	ARL5B	chr10	+	18672644	18672705	18668529	18668677	18673983	18674135	110124	28,18	60,78	5,4	0.0229903	0.679,0.788	0.866,0.913	-0.156
ENSG00000114098.17	ARMC8	chr3	+	138228917	138229010	138223635	138223733	138235033	138235114	113,92	13,12	284230	3,2	2.31152e-07	0.813,0.793	0.979,0.983	-0.178
ENSG00000271147.7	ARMCX5-GPRASP2	chrX	+	102601463	102601509	102599525	102599847	102605481	102605653	6,6	20,9	31,22	10,20	0.0324857	0.154,0.289	0.654,0.401	-0.306
ENSG00000143437.20	ARNT	chr1	-	150842423	150842468	150839398	150839654	150846262	150846307	106,76	81147	118141	64,71	0.0312271	0.446,0.241	0.531,0.549	-0.197
ENSG00000133794.17	ARNTL	chr11	+	13356738	13356777	13354300	13354448	13357054	13357096	32,25	2,7	23,34	0,0	0.00185889	0.912,0.698	1.0,1.0	-0.195
ENSG00000029153.14	ARNTL2	chr12	+	27387227	27387289	27385480	27385560	27389178	27389296	1,3	0,0	9,18	3,3	0.00341855	1.0,1.0	0.616,0.762	0.311
ENSG00000029153.14	ARNTL2	chr12	+	27376345	27376387	27368261	27368412	27380246	27380404	3,3	7,5	1,2	31,27	0.0430147	0.213,0.275	0.02,0.045	0.211
ENSG00000141480.17	ARRB2	chr17	+	4718260	4718345	4717887	4718023	4718611	4718684	83164	17,14	241130	9,2	0.00177024	0.709,0.854	0.931,0.97	-0.169
ENSG00000141480.17	ARRB2	chr17	+	4718260	4718352	4717887	4718023	4718611	4718684	50,83	17,14	134,69	9,2	0.00251856	0.595,0.748	0.882,0.945	-0.242
ENSG00000099889.13	ARVCF	chr22	-	19973118	19973317	19972924	19973036	19973642	19973793	15,39	0,0	44,23	3,3	0.0194981	1.0,1.0	0.88,0.793	0.163
ENSG00000151693.9	ASAP2	chr2	+	9391061	9391196	9388293	9388546	9393481	9393647	4,8	22,32	27,39	17,33	1.97647e-05	0.083,0.111	0.443,0.371	-0.31
ENSG00000196372.12	ASB13	chr10	-	5642472	5642553	5641769	5641961	5648969	5649104	0,0	9,9	3,14	35,29	0.00612076	0.0,0.0	0.041,0.194	-0.118
ENSG00000102048.15	ASB9	chrX	-	15248743	15248935	15244289	15244630	15250429	15250564	29,21	0,0	5,2	0,6	0.0337653	1.0,1.0	1.0,0.143	0.428
ENSG00000102048.15	ASB9	chrX	-	15248682	15248935	15243986	15244630	15250429	15250564	47,27	0,0	9,1	0,6	0.0359142	1.0,1.0	1.0,0.077	0.462
ENSG00000198363.15	ASPH	chr8	-	61643944	61644001	61643385	61643433	61644599	61644632	224215	12,12	30,24	9,4	0.0201012	0.912,0.909	0.649,0.769	0.202
ENSG00000198363.15	ASPH	chr8	-	61646749	61646878	61644599	61644632	61651049	61651124	283298	36,23	53,15	14,7	0.0241925	0.797,0.866	0.654,0.517	0.246
ENSG00000171456.16	ASXL1	chr20	+	32371777	32371874	32369014	32369123	32372163	32372238	16,18	2,0	4,17	3,4	0.0469825	0.8,1.0	0.4,0.68	0.36
ENSG00000119778.14	ATAD2B	chr2	-	23788511	23788647	23786026	23786223	23798137	23798323	56,39	2,6	53,57	0,1	0.0131718	0.933,0.765	1.0,0.966	-0.134
ENSG00000197785.13	ATAD3A	chr1	+	1527160	1527238	1526460	1526531	1527694	1527862	0,0	23,10	5,9	43,25	0.00483905	0.0,0.0	0.055,0.153	-0.104
ENSG00000107669.17	ATE1	chr10	-	121899865	121899994	121870005	121870038	121902390	121902620	54,64	0,1	42,55	4,4	0.0134003	1.0,0.97	0.84,0.873	0.128
ENSG00000115966.16	ATF2	chr2	-	175121443	175121540	175118250	175118369	175130137	175130207	140194	110117	149166	57,69	0.0221698	0.389,0.453	0.567,0.546	-0.135
ENSG00000152348.15	ATG10	chr5	+	82019420	82019461	81987558	81987678	82058494	82058602	0,0	25,14	1,7	17,17	0.0073817	0.0,0.0	0.036,0.208	-0.122
ENSG00000152348.15	ATG10	chr5	+	82164398	82164537	82058494	82058602	82178489	82178587	46,29	8,3	36,35	2,0	0.0233996	0.742,0.829	0.9,1.0	-0.164
ENSG00000145782.12	ATG12	chr5	-	115833511	115833598	115832601	115832664	115837627	115838312	0,0	3,9	0,6	1,4	0.0195077	0.0,0.0	0.0,0.429	-0.214
ENSG00000085978.21	ATG16L1	chr2	+	233273720	233273777	233272965	233273052	233274675	233274778	4,8	21,50	18,11	31,26	0.0380128	0.096,0.082	0.244,0.19	-0.128
ENSG00000168010.10	ATG16L2	chr11	+	72829302	72829348	72828882	72828984	72842616	72843674	7,0	8,6	25,15	1,0	1.87731e-07	0.348,0.0	0.938,1.0	-0.795
ENSG00000130734.9	ATG4D	chr19	+	10546838	10547253	10544956	10545130	10548903	10549034	71,52	3,1	93,75	10,12	0.020186	0.922,0.963	0.823,0.758	0.152
ENSG00000130734.9	ATG4D	chr19	+	10547188	10547253	10544956	10545130	10548903	10549034	29,18	3,1	30,28	10,12	0.0206203	0.835,0.904	0.61,0.549	0.29
ENSG00000198925.10	ATG9A	chr2	-	219228433	219228482	219227921	219228053	219229009	219229325	7,6	12,6	33,20	2,1	1.36505e-06	0.257,0.372	0.907,0.922	-0.6
ENSG00000198925.10	ATG9A	chr2	-	219228433	219228485	219227921	219228053	219229009	219229368	16,14	12,6	37,46	2,1	1.37318e-05	0.435,0.574	0.915,0.964	-0.435
ENSG00000198925.10	ATG9A	chr2	-	219213240	219213326	219212386	219212491	219213438	219213502	41,51	6,10	105,45	0,2	9.47233e-05	0.774,0.718	1.0,0.918	-0.213
ENSG00000198925.10	ATG9A	chr2	-	219216651	219216832	219216363	219216465	219218124	219220452	38,27	12,1	33,18	0,0	0.00122124	0.613,0.931	1.0,1.0	-0.228
ENSG00000198925.10	ATG9A	chr2	-	219217669	219217807	219216363	219216465	219218124	219220452	25,30	12,1	16,14	0,0	0.00249498	0.51,0.938	1.0,1.0	-0.276
ENSG00000198925.10	ATG9A	chr2	-	219213007	219213065	219212386	219212491	219213438	219213502	51,54	6,10	41,59	0,2	0.00264744	0.824,0.749	1.0,0.942	-0.184
ENSG00000198925.10	ATG9A	chr2	-	219215996	219216180	219214960	219215082	219216363	219216465	73,67	23,3	119113	5,3	0.0436276	0.613,0.918	0.922,0.95	-0.17
ENSG00000105726.16	ATP13A1	chr19	-	19662346	19662499	19659897	19659987	19663270	19663673	6,5	29,4	2,0	27,23	0.00856803	0.094,0.385	0.036,0.0	0.222
ENSG00000133657.14	ATP13A3	chr3	-	194412198	194412428	194402676	194406116	194413758	194413839	20,20	65,59	95,58	67,44	1.00954e-07	0.133,0.145	0.415,0.397	-0.267
ENSG00000133657.14	ATP13A3	chr3	-	194412198	194412288	194402676	194406116	194413758	194413839	31,30	65,59	119,81	67,44	2.97913e-07	0.193,0.203	0.47,0.479	-0.276
ENSG00000017260.19	ATP2C1	chr3	+	131001219	131001314	130999517	130999659	131016151	131016712	71,77	0,0	54,50	0,8	0.00690726	1.0,1.0	1.0,0.758	0.121
ENSG00000017260.19	ATP2C1	chr3	+	131001219	131001344	130999517	130999659	131016151	131016684	80,83	0,0	59,56	0,8	0.00750249	1.0,1.0	1.0,0.778	0.111
ENSG00000165629.19	ATP5C1	chr10	+	7806973	7807010	7802757	7802854	7807658	7807793	727719	36,76	914916	1,1	0	0.93,0.862	0.998,0.998	-0.102
ENSG00000241468.7	ATP5J2	chr7	-	99459146	99459153	99458194	99458355	99460085	99460193	30,26	10,3	44,35	39,32	0.00378896	0.734,0.889	0.51,0.502	0.305
ENSG00000250565.6	ATP6V1E2	chr2	-	46527940	46528047	46511846	46512812	46535812	46535927	8,4	9,4	13,17	3,3	0.0267693	0.308,0.333	0.684,0.739	-0.391
ENSG00000054793.13	ATP9A	chr20	-	51694007	51694102	51690734	51690819	51696092	51696144	589485	39,29	520446	3,2	1.23428e-10	0.883,0.893	0.989,0.991	-0.102
ENSG00000054793.13	ATP9A	chr20	-	51690738	51690819	51676131	51676208	51712965	51713074	27,38	0,11	1,6	0,0	0.0117726	1.0,0.633	1.0,1.0	-0.183
ENSG00000166377.19	ATP9B	chr18	+	79176812	79176907	79154503	79154555	79193182	79193263	20,29	12,9	24,34	1,4	0.0153396	0.455,0.617	0.923,0.81	-0.331
ENSG00000175054.14	ATR	chr3	-	142503361	142503453	142499626	142499718	142505138	142505303	22,17	6,1	78,74	2,0	0.00801843	0.647,0.895	0.951,1.0	-0.205
ENSG00000085224.20	ATRX	chrX	-	77717130	77717243	77698573	77698629	77785981	77786216	74,78	4,13	74,77	1,0	0.000289156	0.902,0.75	0.974,1.0	-0.161
ENSG00000085224.20	ATRX	chrX	-	77595711	77595785	77593695	77593849	77599410	77599580	6,4	18,12	1,0	28,24	0.00260697	0.143,0.143	0.018,0.0	0.134
ENSG00000066427.21	ATXN3	chr14	-	92093745	92093831	92088729	92088817	92096092	92096137	71116	8,10	95113	0,1	5.46127e-05	0.816,0.853	1.0,0.983	-0.157
ENSG00000066427.21	ATXN3	chr14	-	92093745	92093850	92093251	92093318	92096092	92096137	62,85	0,1	56,75	7,6	0.000686583	1.0,0.977	0.8,0.862	0.157
ENSG00000148090.11	AUH	chr9	-	91327499	91327651	91325317	91325404	91355882	91355970	5,6	17,10	0,1	19,17	0.00215012	0.128,0.231	0.0,0.029	0.165
ENSG00000148090.11	AUH	chr9	-	91360278	91360440	91356087	91356155	91361627	91361887	25,35	29,22	11,10	39,28	0.00298777	0.301,0.443	0.124,0.152	0.234
ENSG00000148090.11	AUH	chr9	-	91360370	91360440	91356087	91356155	91361627	91361887	27,42	29,22	16,12	39,28	0.0123043	0.319,0.49	0.171,0.178	0.23
ENSG00000115307.16	AUP1	chr2	-	74528252	74528489	74527939	74528006	74528750	74528936	42,53	5,7	92,91	1,3	0.013466	0.808,0.791	0.979,0.938	-0.159
ENSG00000115307.16	AUP1	chr2	-	74528416	74528489	74527939	74528006	74528750	74529282	42,53	5,7	82,91	1,3	0.0174835	0.808,0.791	0.976,0.938	-0.157
ENSG00000087586.17	AURKA	chr20	-	56388311	56388506	56388155	56388202	56390555	56390665	3,9	19,13	0,0	39,20	0.000271754	0.073,0.257	0.0,0.0	0.165
ENSG00000155096.13	AZIN1	chr8	-	102849998	102850165	102843707	102843747	102858012	102858150	151144	201173	115113	324264	0.000131278	0.273,0.294	0.151,0.176	0.12
ENSG00000155096.13	AZIN1	chr8	-	102849998	102850127	102843550	102843747	102858012	102858044	145142	201173	112112	324264	0.000184574	0.265,0.291	0.147,0.175	0.117
ENSG00000155096.13	AZIN1	chr8	-	102849998	102850144	102843707	102843729	102858012	102858150	32,30	2,0	29,49	9,12	0.00094758	0.889,1.0	0.617,0.671	0.3
ENSG00000155096.13	AZIN1	chr8	-	102849998	102850144	102843550	102843747	102858012	102858150	174171	201173	140161	324264	0.00150864	0.302,0.331	0.178,0.234	0.11
ENSG00000162885.12	B3GALNT2	chr1	-	235489167	235489352	235484438	235484515	235494680	235494828	18,11	9,17	50,26	9,6	0.0191834	0.5,0.244	0.735,0.684	-0.338
ENSG00000162885.12	B3GALNT2	chr1	-	235489167	235489268	235484321	235484515	235494680	235494828	34,21	9,17	89,47	9,6	0.0229858	0.654,0.382	0.832,0.797	-0.296
ENSG00000204463.12	BAG6	chr6	-	31644306	31644414	31644081	31644227	31644524	31644602	49,69	4,3	35,55	0,0	0.0252933	0.86,0.92	1.0,1.0	-0.11
ENSG00000204463.12	BAG6	chr6	-	31648910	31648922	31648676	31648751	31649198	31649416	3,16	72,65	20,11	44,31	0.0264814	0.035,0.175	0.282,0.235	-0.153
ENSG00000266074.8	BAHCC1	chr17	+	81446737	81446830	81445353	81445681	81447035	81447848	2,2	13,4	6,14	8,6	0.0380753	0.071,0.2	0.273,0.538	-0.27
ENSG00000172530.19	BANP	chr16	+	88003481	88003563	87984059	87984259	88004294	88004391	0,0	14,14	6,8	24,34	0.0035201	0.0,0.0	0.111,0.105	-0.108
ENSG00000198604.10	BAZ1A	chr14	-	34786125	34786221	34785776	34786001	34792774	34792921	54,52	27,15	154143	14,10	5.08009e-05	0.5,0.634	0.846,0.877	-0.294
ENSG00000076108.11	BAZ2A	chr12	-	56630775	56630865	56617394	56617532	56636181	56636318	20,17	18,19	27,20	3,6	0.00485744	0.357,0.309	0.818,0.625	-0.389
ENSG00000076108.11	BAZ2A	chr12	-	56630775	56630841	56617394	56617532	56636181	56636318	15,15	18,19	24,13	3,6	0.0230188	0.302,0.29	0.806,0.529	-0.371
ENSG00000076108.11	BAZ2A	chr12	-	56630775	56630925	56617394	56617532	56636181	56636318	18,15	18,19	21,13	3,6	0.044041	0.333,0.283	0.778,0.52	-0.341
ENSG00000123636.17	BAZ2B	chr2	-	159400598	159400664	159398828	159398894	159404848	159404910	92,70	32,16	149149	1,4	1.59576e-11	0.599,0.694	0.987,0.951	-0.323
ENSG00000174483.19	BBS1	chr11	+	66511204	66511239	66511011	66511089	66514405	66514678	8,16	0,0	30,19	3,5	0.00451635	1.0,1.0	0.871,0.719	0.205
ENSG00000174483.19	BBS1	chr11	+	66523171	66523365	66521269	66521376	66523455	66523531	2,5	10,17	0,0	15,24	0.0154341	0.091,0.128	0.0,0.0	0.11
ENSG00000140463.13	BBS4	chr15	+	72715290	72715402	72712243	72712307	72716777	72716851	21,24	5,2	53,31	1,0	0.00519597	0.677,0.857	0.964,1.0	-0.215
ENSG00000140463.13	BBS4	chr15	+	72729615	72729684	72724527	72724655	72731304	72731457	36,42	9,16	62,83	8,2	0.00567983	0.67,0.571	0.797,0.955	-0.255
ENSG00000140463.13	BBS4	chr15	+	72727939	72727994	72724565	72724655	72731304	72731457	12,27	9,16	28,38	8,2	0.0278425	0.429,0.488	0.664,0.915	-0.331
ENSG00000122507.20	BBS9	chr7	+	33352858	33352873	33351218	33351323	33357854	33357995	58,25	9,3	34,39	0,0	0.000724147	0.843,0.874	1.0,1.0	-0.141
ENSG00000122507.20	BBS9	chr7	+	33183274	33183405	33177477	33177591	33257235	33257410	5,3	8,4	4,0	26,15	0.0478587	0.238,0.273	0.071,0.0	0.22
ENSG00000114439.18	BBX	chr3	+	107789786	107789876	107778370	107778519	107791239	107791299	87126	78,78	104,81	16,22	4.75823e-05	0.358,0.447	0.765,0.648	-0.304
ENSG00000064787.12	BCAS1	chr20	-	53957431	53957497	53953431	53953695	53966905	53967073	493366	178412	112,87	18,9	0.00094758	0.59,0.315	0.763,0.834	-0.346
ENSG00000064787.12	BCAS1	chr20	-	53957431	53957497	53953431	53953695	53975388	53975430	396256	54187	77,73	6,6	0.0479858	0.792,0.415	0.869,0.863	-0.262
ENSG00000141376.20	BCAS3	chr17	+	61388617	61388708	61380505	61380571	61391976	61392831	55,24	67,32	181168	76,91	0.000125566	0.291,0.273	0.544,0.48	-0.23
ENSG00000141376.20	BCAS3	chr17	+	60688019	60688195	60683981	60684036	60688931	60688987	19,36	11,26	12,10	25,18	0.0219687	0.463,0.409	0.194,0.217	0.23
ENSG00000153094.21	BCL2L11	chr2	+	111124049	111124139	111123745	111123869	111150043	111150147	70,45	0,0	71,50	16,10	1.27285e-07	1.0,1.0	0.689,0.714	0.298
ENSG00000126453.9	BCL2L12	chr19	+	49667021	49667161	49666684	49666799	49668850	49668937	2,6	12,6	62,46	16,14	0.00125289	0.077,0.333	0.66,0.622	-0.436
ENSG00000126453.9	BCL2L12	chr19	+	49667018	49667161	49666684	49666799	49668850	49668937	10,12	12,6	120,77	16,14	0.00434426	0.294,0.5	0.789,0.733	-0.364
ENSG00000099968.17	BCL2L13	chr22	+	17702242	17702378	17696140	17696210	17726676	17728721	28,30	15,22	30,36	1,10	0.0312781	0.483,0.405	0.938,0.643	-0.346
ENSG00000258643.5	BCL2L2-PABPN1	chr14	+	23319734	23319830	23307759	23308199	23322180	23322295	27,13	15,7	17,6	0,2	0.0359768	0.474,0.481	1.0,0.6	-0.323
ENSG00000089685.14	BIRC5	chr17	+	78222827	78222992	78220746	78220863	78223464	78223554	12,17	0,1	5,17	3,5	0.00311721	1.0,0.895	0.455,0.63	0.405
ENSG00000115760.13	BIRC6	chr2	+	32524887	32525018	32518816	32518946	32525463	32525628	70,59	4,13	66,77	0,0	3.9772e-05	0.897,0.694	1.0,1.0	-0.205
ENSG00000115760.13	BIRC6	chr2	+	32590805	32590978	32575155	32575366	32597750	32597968	12,11	3,2	8,10	1,0	0.0451664	0.667,0.733	0.8,1.0	-0.2
ENSG00000104081.13	BMF	chr15	-	40104242	40104340	40091786	40091888	40105794	40106086	30,7	6,2	6,19	0,0	0.00115754	0.714,0.636	1.0,1.0	-0.325
ENSG00000104081.13	BMF	chr15	-	40104179	40104340	40087892	40091888	40105794	40106091	53,19	6,2	11,27	0,0	0.00498933	0.815,0.826	1.0,1.0	-0.179
ENSG00000138756.17	BMP2K	chr4	+	78847187	78847269	78844927	78845049	78850923	78851056	18,21	0,0	18,33	1,4	0.0376769	1.0,1.0	0.9,0.805	0.147
ENSG00000136122.15	BORA	chr13	+	72731280	72731387	72728925	72729093	72737961	72738043	16,17	31,42	49,13	14,5	5.53704e-07	0.205,0.168	0.636,0.565	-0.414
ENSG00000136122.15	BORA	chr13	+	72734959	72735005	72728925	72729093	72737961	72738043	7,10	31,42	14,12	14,5	0.00254459	0.121,0.127	0.378,0.594	-0.362
ENSG00000185515.14	BRCC3	chrX	+	155073373	155073431	155072326	155072343	155077169	155077289	16,6	5,0	18,22	0,0	0.0204755	0.638,1.0	1.0,1.0	-0.181
ENSG00000100425.18	BRD1	chr22	-	49818221	49818383	49804203	49804360	49822950	49823301	2,5	19,11	1,0	39,23	0.025905	0.05,0.185	0.013,0.0	0.111
ENSG00000100425.18	BRD1	chr22	-	49820833	49820986	49804203	49804360	49822950	49823205	10,18	19,11	2,12	39,23	0.0483421	0.208,0.45	0.025,0.207	0.213
ENSG00000112983.17	BRD8	chr5	-	138159554	138159599	138156881	138157267	138160068	138160208	31,51	72,72	107106	95,86	0.00925556	0.209,0.303	0.409,0.431	-0.164
ENSG00000028310.17	BRD9	chr5	-	868606	869119	865413	865581	869244	869404	11,9	0,0	3,0	2,3	4.68043e-06	1.0,1.0	0.429,0.0	0.785
ENSG00000028310.17	BRD9	chr5	-	868606	868804	865413	865581	870472	870553	8,10	31,34	3,0	65,52	0.000163765	0.114,0.128	0.023,0.0	0.11
ENSG00000185024.16	BRF1	chr14	-	105241264	105241414	105228819	105228913	105252506	105252579	26,15	5,4	89,53	4,0	0.009775	0.722,0.652	0.918,1.0	-0.272
ENSG00000136492.8	BRIP1	chr17	-	61778672	61778778	61776400	61776562	61780260	61780401	54,72	90100	44,55	159140	0.00662402	0.231,0.265	0.122,0.164	0.105
ENSG00000174744.13	BRMS1	chr11	-	66338242	66338282	66337338	66337889	66338720	66338785	74,63	6,6	238221	0,6	0.00466289	0.888,0.871	1.0,0.959	-0.1
ENSG00000100916.13	BRMS1L	chr14	+	35832977	35833105	35831409	35831500	35862589	35862686	39,27	7,2	27,15	1,0	0.0164332	0.736,0.871	0.931,1.0	-0.162
ENSG00000100916.13	BRMS1L	chr14	+	35830963	35831066	35826440	35826658	35831409	35831500	0,0	16,10	8,0	16,17	0.0201671	0.0,0.0	0.2,0.0	-0.1
ENSG00000162819.11	BROX	chr1	+	222713587	222713667	222712558	222712942	222715144	222715269	6,10	0,0	11,15	2,3	0.0121019	1.0,1.0	0.733,0.714	0.276
ENSG00000162819.11	BROX	chr1	+	222713587	222713777	222712558	222712942	222715144	222715269	6,10	0,0	11,15	2,3	0.0121019	1.0,1.0	0.733,0.714	0.276
ENSG00000011114.14	BTBD7	chr14	-	93263784	93263993	93257194	93257355	93293857	93294937	11,5	0,0	22,13	7,0	0.00956062	1.0,1.0	0.611,1.0	0.195
ENSG00000158636.16	C11orf30	chr11	+	76539598	76539640	76537794	76537950	76542215	76542367	34,21	36,25	62,74	18,15	6.16228e-06	0.373,0.346	0.685,0.757	-0.362
ENSG00000158636.16	C11orf30	chr11	+	76535887	76536059	76528267	76528466	76537794	76537950	72,55	0,1	71,56	7,10	0.000133934	1.0,0.965	0.835,0.737	0.196
ENSG00000158636.16	C11orf30	chr11	+	76535894	76536059	76528267	76528466	76537794	76537950	96,74	0,1	108,89	7,10	0.000388403	1.0,0.974	0.885,0.817	0.136
ENSG00000149179.13	C11orf49	chr11	+	47137315	47137560	47052387	47052518	47137644	47137729	41,17	53,43	5,10	44,27	0.0343265	0.279,0.165	0.054,0.156	0.117
ENSG00000166352.15	C11orf74	chr11	+	36633283	36633438	36610080	36610239	36648015	36648155	6,15	3,3	20,13	0,0	0.000584262	0.5,0.714	1.0,1.0	-0.393
ENSG00000173715.15	C11orf80	chr11	+	66756352	66756505	66748378	66748517	66759042	66759096	49,91	1,3	50,32	8,3	0.0429083	0.961,0.938	0.758,0.842	0.149
ENSG00000168005.8	C11orf84	chr11	+	63818509	63818652	63818215	63818365	63818801	63819002	101,61	2,0	75,60	3,9	0.0081664	0.962,1.0	0.926,0.769	0.133
ENSG00000047621.11	C12orf4	chr12	-	4518773	4518880	4518057	4518255	4525253	4525375	13,5	0,6	35,49	0,0	0.0290762	1.0,0.294	1.0,1.0	-0.353
ENSG00000140104.13	C14orf79	chr14	+	104989631	104989707	104988942	104989088	104991490	104991620	0,0	3,9	14,8	7,4	3.26425e-06	0.0,0.0	0.5,0.5	-0.5
ENSG00000130731.15	C16orf13	chr16	-	635611	635774	634718	634797	636093	636366	44111	35,35	146115	17,8	0.000222867	0.386,0.613	0.811,0.878	-0.345
ENSG00000130731.15	C16orf13	chr16	-	635611	635774	634888	635063	636093	636366	36,97	5,6	117,94	0,0	0.00031048	0.783,0.89	1.0,1.0	-0.163
ENSG00000130731.15	C16orf13	chr16	-	635517	635774	634736	634797	636093	636260	35,97	35,35	117,94	17,8	0.000829231	0.333,0.581	0.775,0.855	-0.358
ENSG00000130731.15	C16orf13	chr16	-	635280	635340	634888	635063	636093	636351	39,62	5,6	48,23	0,0	0.00125471	0.809,0.849	1.0,1.0	-0.171
ENSG00000130731.15	C16orf13	chr16	-	635611	635774	635280	635340	636093	636366	52126	43,50	185169	46,12	0.00507595	0.377,0.558	0.668,0.876	-0.304
ENSG00000130731.15	C16orf13	chr16	-	635280	635340	634718	634797	636093	636351	46,60	35,35	68,28	17,8	0.0150371	0.416,0.482	0.685,0.655	-0.221
ENSG00000130731.15	C16orf13	chr16	-	634888	634956	634718	634797	636093	636331	83187	35,35	127121	17,8	0.0252933	0.548,0.732	0.792,0.885	-0.199
ENSG00000130731.15	C16orf13	chr16	-	634888	634956	634718	634797	635611	635774	89193	10,14	125127	29,21	0.027127	0.82,0.876	0.688,0.756	0.126
ENSG00000130731.15	C16orf13	chr16	-	634888	635063	634718	634797	635611	635774	84186	10,14	125121	29,21	0.0320259	0.808,0.869	0.683,0.742	0.126
ENSG00000130731.15	C16orf13	chr16	-	634888	635063	634718	634797	636093	636239	87192	35,35	125121	17,8	0.0332968	0.554,0.733	0.786,0.883	-0.191
ENSG00000130731.15	C16orf13	chr16	-	635517	635774	635280	635340	636093	636260	34,97	43,50	118101	46,12	0.0388533	0.283,0.492	0.562,0.808	-0.298
ENSG00000140688.16	C16orf58	chr16	-	31492977	31493048	31492196	31492340	31493602	31493787	41,98	12,5	107106	4,0	0.00707888	0.631,0.907	0.93,1.0	-0.196
ENSG00000155330.9	C16orf87	chr16	-	46809602	46809785	46802093	46803070	46824385	46824482	92134	1,4	101109	3,16	0.0373668	0.979,0.944	0.944,0.773	0.103
ENSG00000125319.14	C17orf53	chr17	+	44150960	44151044	44147857	44149027	44154555	44154664	10,9	5,0	13,7	0,0	0.024035	0.5,1.0	1.0,1.0	-0.25
ENSG00000178927.16	C17orf62	chr17	-	82447579	82447621	82446622	82446696	82449169	82449292	11,19	6,5	81,49	5,0	0.00222744	0.536,0.706	0.911,1.0	-0.335
ENSG00000178927.16	C17orf62	chr17	-	82447579	82447646	82446622	82446696	82449169	82449320	6,6	6,5	22,18	5,0	0.0146046	0.34,0.382	0.694,1.0	-0.486
ENSG00000130813.17	C19orf66	chr19	+	10089110	10089378	10087250	10087300	10089656	10089695	4,2	8,20	5,4	3,1	0.0250875	0.2,0.048	0.455,0.667	-0.437
ENSG00000000460.16	C1orf112	chr1	+	169800882	169800971	169798918	169798958	169802620	169802725	76,41	7,8	105,47	4,1	0.0423392	0.844,0.719	0.929,0.959	-0.162
ENSG00000196476.11	C20orf96	chr20	-	289558	289676	283962	284081	290258	290307	39,26	0,0	18,9	3,1	0.0356475	1.0,1.0	0.75,0.818	0.216
ENSG00000160298.17	C21orf58	chr21	-	46301996	46302154	46300429	46300794	46302484	46302576	6,7	4,1	18,21	1,0	0.00837448	0.429,0.778	0.9,1.0	-0.346
ENSG00000172375.12	C2CD2L	chr11	+	119110103	119110199	119107382	119108095	119110560	119110680	16,19	3,5	39,36	2,0	0.00956635	0.727,0.655	0.907,1.0	-0.262
ENSG00000163026.11	C2orf44	chr2	-	24032828	24032946	24029339	24031162	24037676	24039512	31,10	0,0	33,17	3,3	0.00828907	1.0,1.0	0.846,0.739	0.208
ENSG00000168887.10	C2orf68	chr2	-	85611473	85611573	85609434	85609586	85611667	85611741	21,25	52,22	12,9	134142	5.65989e-07	0.168,0.362	0.043,0.031	0.228
ENSG00000168887.10	C2orf68	chr2	-	85611396	85611573	85609434	85609586	85611667	85611741	21,21	52,22	12,10	134142	8.1728e-07	0.168,0.323	0.043,0.034	0.207
ENSG00000168887.10	C2orf68	chr2	-	85611391	85611573	85609434	85609586	85611667	85611741	21,19	52,22	15,12	134142	1.02484e-05	0.168,0.302	0.053,0.041	0.188
ENSG00000163689.18	C3orf67	chr3	-	58913707	58913864	58884544	58884709	58937647	58937762	8,13	0,1	14,10	3,2	0.0391478	1.0,0.867	0.7,0.714	0.227
ENSG00000197603.13	C5orf42	chr5	-	37139339	37139370	37138701	37138848	37142309	37142641	13,6	0,0	15,34	5,1	0.015107	1.0,1.0	0.677,0.96	0.181
ENSG00000243587.6	C6orf183	chr6	+	109269740	109269931	109267807	109267901	109270038	109271014	11,27	1,0	33,22	2,6	0.0261825	0.846,1.0	0.892,0.647	0.153
ENSG00000204387.12	C6orf48	chr6	+	31836423	31836517	31835410	31835451	31837235	31837433	549559	252219	655967	162270	0.00461702	0.521,0.561	0.669,0.642	-0.114
ENSG00000204387.12	C6orf48	chr6	+	31836412	31836517	31835410	31835451	31837235	31837435	321310	252219	350578	162270	0.00728302	0.389,0.414	0.519,0.517	-0.117
ENSG00000204387.12	C6orf48	chr6	+	31836426	31836517	31835410	31835451	31837235	31837433	322310	252219	345574	162270	0.00953764	0.39,0.414	0.516,0.515	-0.114
ENSG00000204387.12	C6orf48	chr6	+	31836298	31836517	31835410	31835451	31837235	31837435	339333	252219	362606	162270	0.0113411	0.402,0.432	0.528,0.529	-0.111
ENSG00000204387.12	C6orf48	chr6	+	31836294	31836517	31835410	31835451	31837235	31837435	327317	252219	350575	162270	0.0120334	0.394,0.42	0.519,0.516	-0.111
ENSG00000148362.10	C9orf142	chr9	+	136992639	136992700	136992417	136992562	136993052	136993243	23,36	0,0	119147	13,5	0.00553299	1.0,1.0	0.831,0.941	0.114
ENSG00000148362.10	C9orf142	chr9	+	136992639	136992704	136992462	136992562	136993052	136993243	30,38	0,0	131170	13,5	0.00618361	1.0,1.0	0.84,0.947	0.107
ENSG00000148120.14	C9orf3	chr9	+	95080971	95081172	95080693	95080780	95082574	95082719	0,0	22,6	6,1	9,14	0.0120812	0.0,0.0	0.25,0.034	-0.142
ENSG00000148120.14	C9orf3	chr9	+	94928424	94928531	94923985	94924175	94955176	94955279	9,18	7,16	22,22	4,6	0.0289244	0.391,0.36	0.733,0.647	-0.314
ENSG00000074410.13	CA12	chr15	-	63327148	63327233	63325979	63326357	63338818	63338945	136,92	1,14	310272	4,2	0.00901792	0.986,0.767	0.975,0.986	-0.104
ENSG00000158966.13	CACHD1	chr1	+	64632598	64632743	64629354	64629481	64634043	64634260	26,17	5,0	16,16	0,0	0.0378213	0.722,1.0	1.0,1.0	-0.139
ENSG00000167535.7	CACNB3	chr12	+	48819635	48819942	48818908	48818974	48823343	48823466	2,0	22,36	2,7	15,5	0.00818763	0.043,0.0	0.063,0.412	-0.216
ENSG00000012822.15	CALCOCO1	chr12	-	53724584	53724747	53723620	53723783	53725086	53725266	50,44	16,10	44,66	1,2	4.85938e-05	0.61,0.688	0.957,0.943	-0.301
ENSG00000012822.15	CALCOCO1	chr12	-	53724644	53724747	53723592	53723783	53725086	53725266	154114	16,10	121133	1,2	0.000156284	0.828,0.851	0.984,0.971	-0.138
ENSG00000136436.14	CALCOCO2	chr17	+	48848420	48848455	48848063	48848082	48849251	48849352	70,82	3,32	105114	3,3	0.00805207	0.94,0.633	0.959,0.962	-0.174
ENSG00000164615.4	CAMLG	chr5	+	134743986	134744052	134738582	134738792	134750758	134752160	140132	6,6	82139	13,15	0.0283497	0.924,0.919	0.766,0.828	0.125
ENSG00000171302.16	CANT1	chr17	-	79005371	79005481	79000099	79000270	79009663	79009765	0,0	9,1	17,8	14,3	3.86674e-05	0.0,0.0	0.378,0.571	-0.474
ENSG00000171302.16	CANT1	chr17	-	79000099	79000306	78998228	78998286	79009663	79009765	3,4	0,0	15,11	3,4	0.000965766	1.0,1.0	0.714,0.579	0.354
ENSG00000171302.16	CANT1	chr17	-	79000099	79000270	78998147	78998286	79009663	79009802	12,4	0,0	29,14	3,4	0.00301437	1.0,1.0	0.829,0.636	0.268
ENSG00000112186.11	CAP2	chr6	+	17513848	17513954	17507168	17507312	17539268	17539290	8,13	0,0	17,51	2,5	0.0142174	1.0,1.0	0.81,0.836	0.177
ENSG00000142330.19	CAPN10	chr2	+	240595933	240596152	240595023	240595304	240596318	240596521	4,6	7,5	1,3	23,10	0.0343816	0.222,0.375	0.021,0.13	0.223
ENSG00000131375.9	CAPN7	chr3	+	15241452	15241588	15240753	15240853	15242177	15242253	65,90	52103	156142	17,24	0	0.385,0.304	0.821,0.747	-0.44
ENSG00000131375.9	CAPN7	chr3	+	15245525	15245671	15242177	15242253	15246731	15246794	129143	20,51	227259	2,4	5.18246e-12	0.763,0.584	0.983,0.97	-0.303
ENSG00000203697.11	CAPN8	chr1	-	223616322	223616477	223615969	223616145	223619292	223619453	11,4	11,0	0,2	3,7	0.0240175	0.333,1.0	0.0,0.125	0.604
ENSG00000110888.17	CAPRIN2	chr12	-	30733628	30733711	30731342	30731510	30734967	30735206	0,0	4,8	6,8	6,7	0.000124202	0.0,0.0	0.333,0.364	-0.349
ENSG00000110888.17	CAPRIN2	chr12	-	30719078	30720915	30714958	30716676	30723258	30723314	12,9	10,6	21,18	3,0	0.00170468	0.375,0.429	0.778,1.0	-0.487
ENSG00000110888.17	CAPRIN2	chr12	-	30720810	30720915	30716507	30716676	30723258	30723314	3,3	10,6	6,15	3,0	0.00478293	0.13,0.2	0.5,1.0	-0.585
ENSG00000165233.17	CARD19	chr9	+	93111878	93111938	93110567	93110721	93112217	93112289	27,27	17,31	94,80	0,5	2.73184e-13	0.463,0.321	1.0,0.897	-0.556
ENSG00000105483.16	CARD8	chr19	-	48232452	48232493	48231659	48231810	48234402	48234543	25,9	3,5	24,19	0,0	0.000875389	0.841,0.534	1.0,1.0	-0.313
ENSG00000138380.17	CARF	chr2	+	202966977	202967098	202961236	202961426	202969918	202970062	5,1	3,5	20,15	2,3	0.0199712	0.455,0.091	0.833,0.714	-0.5
ENSG00000138380.17	CARF	chr2	+	202942762	202942967	202941859	202941980	202952558	202952679	32,24	1,0	27,21	2,4	0.0242383	0.941,1.0	0.871,0.724	0.173
ENSG00000138380.17	CARF	chr2	+	202966960	202967098	202961236	202961426	202969918	202970062	5,1	3,5	19,14	2,3	0.0245177	0.455,0.091	0.826,0.7	-0.49
ENSG00000138380.17	CARF	chr2	+	202942887	202942967	202941859	202941980	202952558	202952620	32,24	1,0	27,23	2,4	0.0284764	0.941,1.0	0.871,0.742	0.164
ENSG00000138380.17	CARF	chr2	+	202966869	202967098	202961236	202961426	202969918	202970062	5,1	3,5	19,12	2,3	0.0318227	0.455,0.091	0.826,0.667	-0.473
ENSG00000134905.16	CARS2	chr13	-	110651033	110651100	110646850	110647239	110663450	110663518	11,15	0,0	61,62	4,5	0.0151867	1.0,1.0	0.887,0.865	0.124
ENSG00000134905.16	CARS2	chr13	-	110644069	110644182	110642314	110642521	110644384	110644681	11,3	13,4	4,6	16,39	0.0386908	0.297,0.273	0.111,0.071	0.194
ENSG00000166734.18	CASC4	chr15	+	44338236	44338317	44322964	44323019	44379689	44379788	41,46	5,2	42,56	0,0	0.00723634	0.804,0.92	1.0,1.0	-0.138
ENSG00000147044.20	CASK	chrX	-	41557031	41557100	41553718	41553915	41559778	41559847	8,0	45,39	35,23	17,11	1.39696e-13	0.083,0.0	0.511,0.515	-0.472
ENSG00000147044.20	CASK	chrX	-	41555599	41555635	41553718	41553915	41559778	41559847	13,8	45,39	19,21	17,11	0.000125823	0.161,0.12	0.427,0.56	-0.353
ENSG00000138794.9	CASP6	chr4	-	109696409	109696486	109694523	109694700	109697621	109697768	26,13	0,0	63,36	3,4	0.0173334	1.0,1.0	0.913,0.818	0.135
ENSG00000064012.21	CASP8	chr2	+	201274888	201274953	201272637	201272776	201276826	201276968	28,67	19,17	75,62	5,6	0.00370221	0.435,0.673	0.887,0.844	-0.311
ENSG00000153113.23	CAST	chr5	+	96729152	96729209	96727488	96727530	96729611	96729725	241243	55,97	226185	27,25	0.00317466	0.709,0.582	0.823,0.804	-0.168
ENSG00000133962.7	CATSPERB	chr14	-	91723048	91723189	91719417	91719478	91725079	91725168	6,3	6,21	5,15	3,3	0.0179526	0.333,0.067	0.455,0.714	-0.385
ENSG00000078699.21	CBFA2T2	chr20	+	33618447	33618600	33611093	33611335	33619516	33619606	5,3	4,11	0,0	6,8	0.00391345	0.385,0.12	0.0,0.0	0.253
ENSG00000078699.21	CBFA2T2	chr20	+	33623772	33623854	33623114	33623296	33624763	33625017	1,6	15,9	0,0	4,13	0.0178359	0.032,0.25	0.0,0.0	0.141
ENSG00000145439.11	CBR4	chr4	-	169008951	169009054	169007640	169007756	169009947	169010275	11,6	11,4	0,1	30,29	8.93725e-08	0.333,0.429	0.0,0.017	0.372
ENSG00000145439.11	CBR4	chr4	-	169008951	169009056	169007635	169007756	169009947	169010080	10,5	11,4	1,0	30,29	4.73542e-07	0.313,0.385	0.016,0.0	0.341
ENSG00000145439.11	CBR4	chr4	-	169008951	169008999	169007635	169007756	169009947	169010250	4,5	11,4	0,0	30,29	0.000123869	0.179,0.428	0.0,0.0	0.303
ENSG00000132024.17	CC2D1A	chr19	+	13919798	13919939	13919129	13919202	13920556	13920668	8,5	6,2	24,19	0,0	6.39936e-06	0.4,0.556	1.0,1.0	-0.522
ENSG00000132024.17	CC2D1A	chr19	+	13919817	13919939	13919129	13919202	13920556	13920668	28,21	6,2	47,30	0,0	0.000643247	0.7,0.84	1.0,1.0	-0.23
ENSG00000132024.17	CC2D1A	chr19	+	13919798	13919951	13919129	13919202	13920556	13920668	29,13	6,2	13,26	0,0	0.000827438	0.707,0.765	1.0,1.0	-0.264
ENSG00000132024.17	CC2D1A	chr19	+	13919817	13919951	13919129	13919202	13920556	13920668	49,29	6,2	36,37	0,0	0.00281005	0.803,0.879	1.0,1.0	-0.159
ENSG00000154222.14	CC2D1B	chr1	-	52357000	52357174	52356383	52356442	52357525	52357698	19,16	9,1	21,17	0,0	0.000905861	0.514,0.889	1.0,1.0	-0.298
ENSG00000154222.14	CC2D1B	chr1	-	52357000	52357146	52356383	52356442	52357525	52357698	19,17	9,1	25,17	0,0	0.000931974	0.514,0.895	1.0,1.0	-0.295
ENSG00000154222.14	CC2D1B	chr1	-	52357000	52357126	52356383	52356442	52357525	52357698	22,23	9,1	35,33	0,0	0.00096821	0.55,0.92	1.0,1.0	-0.265
ENSG00000151773.12	CCDC122	chr13	-	43869330	43869489	43868693	43868803	43874841	43874927	5,11	2,6	23,10	2,0	0.0109787	0.556,0.478	0.852,1.0	-0.409
ENSG00000183323.12	CCDC125	chr5	-	69306816	69306902	69300007	69300127	69307950	69308028	33,31	4,2	57,37	0,0	0.0133045	0.805,0.886	1.0,1.0	-0.154
ENSG00000183323.12	CCDC125	chr5	-	69303846	69303929	69300011	69300127	69307950	69308028	54,35	4,2	48,43	0,0	0.0279432	0.871,0.897	1.0,1.0	-0.116
ENSG00000163006.11	CCDC138	chr2	+	108873450	108873589	108856793	108856970	108876087	108876578	13,1	2,2	14,9	1,0	0.0325373	0.765,0.2	0.875,1.0	-0.455
ENSG00000144395.17	CCDC150	chr2	+	196695045	196695159	196677292	196677361	196701108	196701180	7,9	11,7	12,10	2,3	0.0489454	0.241,0.391	0.75,0.625	-0.371
ENSG00000183401.11	CCDC159	chr19	+	11349575	11349687	11346539	11346627	11349937	11350026	3,13	4,2	16,12	0,0	0.000522713	0.273,0.765	1.0,1.0	-0.481
ENSG00000183401.11	CCDC159	chr19	+	11349653	11349687	11346530	11346627	11349937	11350026	5,15	4,2	10,20	0,0	0.00146954	0.459,0.836	1.0,1.0	-0.353
ENSG00000203799.10	CCDC162P	chr6	+	109300230	109300369	109295526	109295692	109305958	109306112	11,26	0,0	10,13	5,0	0.0276866	1.0,1.0	0.5,1.0	0.25
ENSG00000122483.17	CCDC18	chr1	+	93193278	93193387	93191999	93192106	93193615	93193744	6,8	36,23	0,0	33,40	0.00035871	0.077,0.148	0.0,0.0	0.112
ENSG00000122483.17	CCDC18	chr1	+	93237261	93237380	93236247	93236390	93239309	93239473	0,0	14,11	6,7	31,22	0.00459017	0.0,0.0	0.088,0.137	-0.113
ENSG00000122483.17	CCDC18	chr1	+	93212100	93212261	93207106	93207398	93214742	93214966	44,32	4,3	23,21	0,0	0.013466	0.846,0.842	1.0,1.0	-0.156
ENSG00000122483.17	CCDC18	chr1	+	93217737	93217869	93216635	93216746	93221608	93221743	23,13	0,0	17,18	6,0	0.0145465	1.0,1.0	0.586,1.0	0.207
ENSG00000122483.17	CCDC18	chr1	+	93253897	93253959	93246837	93246954	93254470	93254614	0,0	12,4	6,0	8,4	0.0192496	0.0,0.0	0.286,0.0	-0.143
ENSG00000122483.17	CCDC18	chr1	+	93220297	93220470	93216635	93216746	93221608	93221743	5,11	0,0	9,16	6,0	0.0225658	1.0,1.0	0.429,1.0	0.285
ENSG00000122483.17	CCDC18	chr1	+	93183977	93184146	93183359	93183495	93186344	93186503	17,16	0,0	11,12	2,2	0.0225765	1.0,1.0	0.733,0.75	0.258
ENSG00000196118.11	CCDC189	chr16	-	30759011	30759247	30757435	30757654	30759341	30759458	2,0	4,1	28,25	4,0	0.000511896	0.2,0.0	0.778,1.0	-0.789
ENSG00000196118.11	CCDC189	chr16	-	30759177	30759247	30757423	30757654	30759341	30759557	5,2	4,1	48,32	4,0	0.0186215	0.386,0.502	0.858,1.0	-0.485
ENSG00000152492.13	CCDC50	chr3	+	191375061	191375589	191369918	191370036	191380158	191380274	73,66	8,13	32,43	29,25	7.77835e-05	0.82,0.717	0.356,0.462	0.359
ENSG00000120647.9	CCDC77	chr12	+	409367	409421	405510	405564	411746	411978	9,12	3,4	3,6	8,11	0.0108091	0.631,0.631	0.176,0.237	0.424
ENSG00000015133.18	CCDC88C	chr14	-	91309858	91309986	91308350	91308492	91313079	91314150	56,22	3,3	24,25	0,0	0.0240175	0.903,0.786	1.0,1.0	-0.155
ENSG00000204536.13	CCHCR1	chr6	-	31154495	31154799	31150974	31151122	31156730	31156836	20,14	0,0	44,7	7,0	0.00812477	1.0,1.0	0.759,1.0	0.121
ENSG00000136280.15	CCM2	chr7	+	45069825	45069961	45064462	45064646	45072725	45073166	39,48	4,4	72,51	0,1	0.00848722	0.83,0.857	1.0,0.962	-0.138
ENSG00000166946.13	CCNDBP1	chr15	+	43186153	43186233	43185819	43185879	43189198	43189280	22,19	0,5	110121	0,1	0.0409257	1.0,0.655	1.0,0.984	-0.164
ENSG00000134480.13	CCNH	chr5	-	87394404	87394484	87391493	87392904	87395043	87395104	74,67	18,8	121125	9,3	0.0108979	0.673,0.807	0.871,0.954	-0.172
ENSG00000108100.17	CCNY	chr10	+	35525963	35525999	35501500	35501535	35529972	35530036	29,33	3,5	43,35	0,0	0.00322584	0.866,0.815	1.0,1.0	-0.159
ENSG00000163249.9	CCNYL1	chr2	+	207737410	207737446	207733946	207734047	207740654	207740706	46,39	0,0	12,23	6,0	0.0192227	1.0,1.0	0.571,1.0	0.215
ENSG00000103540.16	CCP110	chr16	+	19547954	19548014	19546411	19546474	19551195	19553408	55,34	9,3	85,80	1,0	0.000173838	0.768,0.86	0.979,1.0	-0.175
ENSG00000146574.15	CCZ1B	chr7	-	6812975	6813037	6811951	6812063	6814763	6814845	76,66	12,10	164168	2,7	0.000404889	0.772,0.779	0.978,0.928	-0.177
ENSG00000198087.7	CD2AP	chr6	+	47526627	47526740	47503279	47503440	47544605	47544706	12,22	10,7	7,4	13,11	0.0408624	0.375,0.611	0.212,0.154	0.31
ENSG00000026508.16	CD44	chr11	+	35209964	35210054	35189834	35190065	35211245	35211449	266246	12,31	183355	1,1	1.86268e-08	0.917,0.799	0.989,0.994	-0.133
ENSG00000026508.16	CD44	chr11	+	35208104	35208206	35189834	35190065	35211245	35211401	167123	12,31	73181	1,1	1.70843e-06	0.874,0.665	0.973,0.989	-0.211
ENSG00000026508.16	CD44	chr11	+	35198120	35198246	35189834	35190065	35201081	35201195	31,17	8,1	15,45	0,1	0.00541011	0.66,0.895	1.0,0.957	-0.201
ENSG00000026508.16	CD44	chr11	+	35198147	35198246	35189869	35190065	35201081	35201195	14,8	8,1	9,13	0,1	0.00984095	0.467,0.8	1.0,0.867	-0.3
ENSG00000026508.16	CD44	chr11	+	35204511	35204640	35198120	35198246	35208104	35208206	0,0	9,2	4,3	8,6	0.0101818	0.0,0.0	0.2,0.2	-0.2
ENSG00000026508.16	CD44	chr11	+	35204511	35204640	35189834	35190065	35206111	35206243	17,13	2,0	12,14	2,8	0.0437706	0.81,1.0	0.75,0.467	0.296
ENSG00000117335.18	CD46	chr1	+	207767778	207767823	207767012	207767195	207770320	207770362	270287	199173	393452	144124	1.2542e-05	0.454,0.505	0.626,0.691	-0.179
ENSG00000196776.14	CD47	chr3	-	108049618	108049710	108047080	108047292	108057476	108057569	61,46	66156	202176	49,68	5.42469e-08	0.316,0.128	0.673,0.564	-0.397
ENSG00000196776.14	CD47	chr3	-	108049618	108049651	108047080	108047292	108057476	108057569	62,47	66156	202177	49,68	9.23889e-07	0.392,0.171	0.739,0.641	-0.408
ENSG00000102181.20	CD99L2	chrX	-	150828305	150828368	150795417	150795486	150831230	150831293	3,1	8,5	4,12	1,0	1.37885e-05	0.166,0.096	0.68,1.0	-0.709
ENSG00000102181.20	CD99L2	chrX	-	150828305	150829604	150795417	150795486	150831230	150831293	6,6	8,5	6,5	1,0	0.00192947	0.273,0.375	0.75,1.0	-0.551
ENSG00000102181.20	CD99L2	chrX	-	150816278	150816455	150816006	150816078	150831230	150831293	4,10	6,14	2,3	35,22	0.00296893	0.25,0.263	0.028,0.064	0.211
ENSG00000151465.13	CDC123	chr10	+	12215739	12215835	12210289	12210322	12217360	12217467	227147	16,29	530522	6,33	0.00244503	0.876,0.717	0.978,0.888	-0.137
ENSG00000130177.14	CDC16	chr13	+	114257077	114257230	114250548	114250674	114259334	114259398	35,42	7,2	41,40	0,0	0.00165115	0.714,0.913	1.0,1.0	-0.186
ENSG00000130177.14	CDC16	chr13	+	114261886	114261948	114259334	114259398	114262878	114263014	51,37	1,14	87120	0,2	0.00244344	0.965,0.585	1.0,0.97	-0.21
ENSG00000130177.14	CDC16	chr13	+	114236650	114236699	114235060	114235132	114236798	114236896	13,23	0,5	15,32	0,0	0.0381641	1.0,0.732	1.0,1.0	-0.134
ENSG00000164045.11	CDC25A	chr3	-	48183799	48183836	48182928	48183027	48184652	48184695	0,1	2,0	16,19	0,0	0.0357534	0.0,1.0	1.0,1.0	-0.5
ENSG00000158402.18	CDC25C	chr5	-	138329552	138329647	138328483	138328529	138330986	138331218	30,48	29,63	62,46	20,16	8.7836e-05	0.341,0.276	0.608,0.59	-0.29
ENSG00000198752.10	CDC42BPB	chr14	-	102954197	102954275	102952497	102952603	102954601	102954688	90,57	32,49	149144	36,24	0.025905	0.584,0.368	0.674,0.75	-0.236
ENSG00000197622.12	CDC42SE1	chr1	-	151056655	151056786	151055676	151055993	151059482	151059574	2,2	9,19	11,6	7,3	0.000533115	0.1,0.05	0.44,0.5	-0.395
ENSG00000185324.21	CDK10	chr16	+	89689251	89689324	89686699	89686797	89690552	89690624	21,28	5,14	88,82	4,12	0.0275317	0.677,0.5	0.917,0.774	-0.257
ENSG00000248333.8	CDK11B	chr1	-	1645125	1645262	1642385	1642508	1649498	1649632	33,15	1,0	32,13	11,2	0.000734358	0.943,1.0	0.593,0.765	0.292
ENSG00000102225.15	CDK16	chrX	+	47222272	47222342	47218310	47218664	47223551	47223728	0,0	8,9	7,3	1,8	0.00123812	0.0,0.0	0.779,0.159	-0.469
ENSG00000102225.15	CDK16	chrX	+	47222260	47222380	47218412	47218664	47223551	47223759	0,0	8,9	0,6	1,8	0.0124897	0.0,0.0	0.0,0.273	-0.137
ENSG00000136861.17	CDK5RAP2	chr9	-	120460571	120460747	120458449	120458622	120467859	120467997	7,12	8,13	16,30	7,6	0.0418496	0.304,0.316	0.533,0.714	-0.313
ENSG00000134058.10	CDK7	chr5	+	69252417	69252451	69235393	69235453	69258042	69258153	47,59	8,22	63,55	4,0	0.000252303	0.8,0.646	0.915,1.0	-0.234
ENSG00000100526.19	CDKN3	chr14	+	54399893	54399976	54396999	54397077	54401523	54401579	25,48	11,12	41,40	6,1	0.045066	0.532,0.667	0.774,0.952	-0.263
ENSG00000163624.5	CDS1	chr4	+	84643023	84643143	84640837	84640990	84645221	84645325	87114	29,22	133159	17,10	0.0120334	0.6,0.722	0.796,0.888	-0.181
ENSG00000163624.5	CDS1	chr4	+	84645221	84645325	84640837	84640990	84648556	84651338	94100	6,0	78,66	9,8	0.0327212	0.887,1.0	0.813,0.805	0.135
ENSG00000163624.5	CDS1	chr4	+	84642992	84643143	84640837	84640990	84645221	84645325	40,69	29,22	73105	17,10	0.0348541	0.408,0.611	0.682,0.84	-0.252
ENSG00000115163.14	CENPA	chr2	+	26792755	26792833	26792130	26792240	26793144	26793326	113132	8,15	125,86	4,2	0.0337653	0.876,0.815	0.94,0.956	-0.103
ENSG00000115163.14	CENPA	chr2	+	26792501	26792833	26792130	26792240	26793144	26793326	52,72	8,15	67,43	4,2	0.0349574	0.765,0.706	0.893,0.915	-0.168
ENSG00000138778.11	CENPE	chr4	-	103163478	103163553	103163136	103163256	103174735	103174903	29,25	32,58	59,45	23,16	5.15169e-05	0.312,0.177	0.562,0.584	-0.328
ENSG00000102384.13	CENPI	chrX	+	101161527	101161569	101147942	101148161	101162832	101162987	46,13	25,7	70,53	3,4	1.38922e-06	0.537,0.539	0.936,0.893	-0.377
ENSG00000120334.15	CENPL	chr1	-	173806438	173806580	173802962	173803505	173807266	173807518	3,6	74,37	19,24	54,58	0.000409475	0.02,0.075	0.15,0.171	-0.113
ENSG00000120334.15	CENPL	chr1	-	173806438	173806576	173802962	173803505	173807266	173807518	9,18	74,37	28,45	54,58	0.0237929	0.057,0.196	0.206,0.28	-0.116
ENSG00000102901.12	CENPT	chr16	-	67832227	67832350	67832011	67832108	67832454	67832545	35,31	1,5	57,48	0,0	0.0122325	0.946,0.756	1.0,1.0	-0.149
ENSG00000102901.12	CENPT	chr16	-	67832227	67832354	67832011	67832108	67832454	67832545	37,33	1,5	60,48	0,0	0.014233	0.949,0.767	1.0,1.0	-0.142
ENSG00000151725.11	CENPU	chr4	-	184700819	184700881	184697646	184697803	184702088	184702136	37,17	7,2	153133	0,8	0.0295697	0.739,0.82	1.0,0.899	-0.17
ENSG00000116198.12	CEP104	chr1	-	3836494	3836692	3835061	3835092	3837291	3837345	37,21	0,0	39,54	4,4	0.00828907	1.0,1.0	0.83,0.871	0.149
ENSG00000154240.16	CEP112	chr17	-	66053735	66053879	66029868	66030023	66062962	66063081	12,11	0,0	9,19	0,5	0.0230786	1.0,1.0	1.0,0.655	0.172
ENSG00000141577.13	CEP131	chr17	-	81192735	81192843	81192475	81192593	81193925	81194127	3,4	11,4	12,23	5,2	0.00741608	0.12,0.333	0.545,0.852	-0.472
ENSG00000174799.10	CEP135	chr4	+	55974745	55974969	55971269	55971408	55980142	55980295	23,32	4,1	46,56	0,0	0.0379911	0.742,0.941	1.0,1.0	-0.159
ENSG00000135315.11	CEP162	chr6	-	84169327	84169395	84163143	84163270	84171605	84171718	3,3	4,4	17,7	1,0	4.2202e-05	0.277,0.277	0.897,1.0	-0.671
ENSG00000135315.11	CEP162	chr6	-	84169327	84169433	84163143	84163270	84171605	84171718	13,5	4,4	21,14	1,0	0.00105421	0.619,0.385	0.913,1.0	-0.455
ENSG00000101639.18	CEP192	chr18	+	13103874	13103967	13103508	13103588	13104983	13105079	6,8	5,11	2,2	36,29	0.000178965	0.375,0.267	0.027,0.033	0.291
ENSG00000101639.18	CEP192	chr18	+	13057584	13057733	13055779	13056698	13059081	13059314	25,27	1,0	45,53	4,4	0.0478179	0.926,1.0	0.849,0.869	0.104
ENSG00000198707.14	CEP290	chr12	-	88109065	88109181	88106995	88107098	88111201	88111347	30,32	2,6	24,45	0,0	0.00174857	0.882,0.727	1.0,1.0	-0.196
ENSG00000135837.15	CEP350	chr1	+	179990506	179990621	179987239	179987286	179992061	179992221	190138	23,27	120118	6,8	0.0225658	0.805,0.719	0.909,0.881	-0.133
ENSG00000106477.18	CEP41	chr7	-	130400038	130400254	130393770	130399039	130400706	130400821	21,12	0,0	26,30	5,5	0.00094758	1.0,1.0	0.722,0.75	0.264
ENSG00000182923.16	CEP63	chr3	+	134531844	134531940	134507108	134507286	134537154	134537268	49,53	3,3	38,58	0,0	0.0360785	0.891,0.898	1.0,1.0	-0.105
ENSG00000173588.14	CEP83	chr12	-	94412317	94412425	94411696	94411847	94412516	94412591	6,14	0,0	30,34	2,5	0.00881039	1.0,1.0	0.882,0.773	0.172
ENSG00000173588.14	CEP83	chr12	-	94412317	94412429	94411696	94411847	94412516	94412591	5,14	0,0	30,34	2,5	0.00910244	1.0,1.0	0.882,0.773	0.172
ENSG00000258890.6	CEP95	chr17	+	64527121	64527264	64526070	64526200	64529287	64529427	66,83	6,5	58,48	1,0	0.00976375	0.846,0.892	0.967,1.0	-0.115
ENSG00000182504.10	CEP97	chr3	+	101728813	101728937	101727382	101727541	101731839	101731953	20,24	0,0	44,43	0,6	0.032146	1.0,1.0	1.0,0.782	0.109
ENSG00000167123.18	CERCAM	chr9	+	128434409	128434613	128431170	128431303	128435652	128435905	53,41	0,2	66,43	5,5	0.0487206	1.0,0.911	0.868,0.811	0.116
ENSG00000090661.11	CERS4	chr19	+	8210705	8210862	8209325	8209494	8254498	8254616	15,5	0,0	17,8	3,4	0.000487724	1.0,1.0	0.739,0.5	0.381
ENSG00000090661.11	CERS4	chr19	+	8210682	8210862	8209302	8209494	8251075	8251249	6,4	4,4	13,14	2,0	0.00548891	0.429,0.333	0.765,1.0	-0.502
ENSG00000090661.11	CERS4	chr19	+	8210705	8210862	8209325	8209494	8251075	8251249	19,9	4,4	25,20	2,0	0.0240175	0.704,0.529	0.862,1.0	-0.315
ENSG00000139624.12	CERS5	chr12	-	50142052	50142110	50138566	50138617	50143073	50143204	63,94	16,12	92,90	4,1	0.000422481	0.685,0.812	0.927,0.98	-0.205
ENSG00000139624.12	CERS5	chr12	-	50144768	50144969	50143951	50144057	50167100	50167533	19,19	28,54	4,7	62,53	0.000429358	0.253,0.15	0.031,0.062	0.155
ENSG00000206530.8	CFAP44	chr3	-	113373410	113373556	113366038	113366309	113379305	113379551	6,9	30,13	3,1	30,24	0.0322835	0.091,0.257	0.048,0.02	0.14
ENSG00000159685.10	CHCHD6	chr3	+	126780339	126780430	126733077	126733222	126852646	126852730	0,0	9,19	4,2	12,12	0.0364263	0.0,0.0	0.143,0.077	-0.11
ENSG00000170004.16	CHD3	chr17	+	7910427	7910591	7909142	7909338	7910846	7910973	109,74	44,35	175161	27,23	0.000109253	0.553,0.514	0.764,0.778	-0.237
ENSG00000170004.16	CHD3	chr17	+	7910438	7910591	7909142	7909338	7910846	7910895	84,47	44,35	125102	27,23	0.000849212	0.488,0.402	0.698,0.689	-0.248
ENSG00000100888.12	CHD8	chr14	-	21436900	21436965	21431810	21431858	21437193	21437265	7,9	3,5	9,14	0,1	0.00199874	0.549,0.485	1.0,0.88	-0.423
ENSG00000177200.15	CHD9	chr16	+	53321162	53321217	53318211	53318340	53321525	53321630	0,0	7,9	4,4	6,6	0.00142867	0.0,0.0	0.273,0.273	-0.273
ENSG00000016391.10	CHDH	chr3	-	53819188	53819331	53818937	53819040	53819531	53819674	11,6	13,4	0,2	22,3	0.00253969	0.297,0.429	0.0,0.25	0.238
ENSG00000149554.12	CHEK1	chr11	+	125637448	125637544	125635428	125635533	125643791	125643900	20,10	3,13	91,87	0,1	1.02176e-05	0.769,0.278	1.0,0.978	-0.465
ENSG00000072609.17	CHFR	chr12	-	132869618	132869789	132861546	132861634	132872284	132872394	2,0	2,8	10,11	4,2	0.00191644	0.333,0.0	0.556,0.733	-0.478
ENSG00000177830.17	CHID1	chr11	-	893426	893519	884067	884169	899339	899401	34,29	2,5	96101	1,0	0.00333323	0.895,0.744	0.98,1.0	-0.17
ENSG00000110721.11	CHKA	chr11	-	68081403	68081457	68074716	68074830	68097018	68097130	47,51	0,1	49,28	4,4	0.0112322	1.0,0.967	0.875,0.799	0.147
ENSG00000131165.14	CHMP1A	chr16	-	89653903	89653923	89651568	89651646	89657581	89657650	50,66	0,4	114,86	17,18	0.00192947	1.0,0.928	0.841,0.79	0.148
ENSG00000115561.15	CHMP3	chr2	-	86529217	86529397	86510377	86510479	86563303	86563479	41,51	4,5	93,69	0,0	0.000820468	0.837,0.836	1.0,1.0	-0.163
ENSG00000127586.16	CHTF18	chr16	+	791850	791948	791160	791370	792223	792344	10,8	4,6	49,25	1,0	7.48431e-06	0.556,0.4	0.961,1.0	-0.502
ENSG00000127586.16	CHTF18	chr16	+	792438	792590	792223	792367	792717	792811	11,14	0,0	44,27	3,3	0.0337199	1.0,1.0	0.88,0.818	0.151
ENSG00000099622.13	CIRBP	chr19	+	1272426	1272523	1271980	1272051	1274306	1274480	104158	39,44	166228	7,8	2.25795e-12	0.571,0.642	0.922,0.934	-0.322
ENSG00000099622.13	CIRBP	chr19	+	1273600	1273715	1271980	1272051	1274306	1274440	4,8	39,44	9,12	7,8	3.94675e-05	0.049,0.083	0.391,0.429	-0.344
ENSG00000099622.13	CIRBP	chr19	+	1273488	1273715	1271980	1272051	1274306	1274444	4,8	39,44	9,12	7,8	3.94675e-05	0.049,0.083	0.391,0.429	-0.344
ENSG00000099622.13	CIRBP	chr19	+	1273493	1273715	1271980	1272051	1274306	1274444	10,9	39,44	10,11	7,8	0.00107411	0.114,0.093	0.417,0.407	-0.308
ENSG00000122966.13	CIT	chr12	-	119734163	119734406	119730494	119730630	119735159	119735357	35,40	8,0	51,33	0,0	0.00757668	0.686,1.0	1.0,1.0	-0.157
ENSG00000148337.20	CIZ1	chr9	-	128190328	128190428	128185546	128185776	128190687	128190862	32,22	0,0	15,11	2,2	0.0312635	1.0,1.0	0.789,0.733	0.239
ENSG00000148337.20	CIZ1	chr9	-	128190328	128190398	128185546	128185776	128190687	128190849	31,22	0,0	15,11	2,2	0.0316615	1.0,1.0	0.791,0.735	0.237
ENSG00000148337.20	CIZ1	chr9	-	128187862	128187934	128185546	128185776	128190328	128190444	169170	28,22	206178	15,11	0.0360785	0.751,0.794	0.873,0.89	-0.109
ENSG00000169607.12	CKAP2L	chr2	-	112755976	112756134	112752266	112752474	112756892	112757214	41104	6,2	59,71	0,0	0.0107779	0.774,0.963	1.0,1.0	-0.131
ENSG00000175216.14	CKAP5	chr11	-	46778295	46778313	46778138	46778191	46778459	46778599	32,39	1,0	27,32	5,3	0.0142174	0.963,1.0	0.813,0.896	0.127
ENSG00000074054.17	CLASP1	chr2	-	121445448	121445496	121430072	121430177	121447336	121447507	72,69	17,14	44,33	50,16	0.00610074	0.717,0.747	0.345,0.552	0.283
ENSG00000109572.13	CLCN3	chr4	+	169717791	169717867	169713078	169713295	169719906	169720545	35,21	42,61	14,10	49,60	0.0495063	0.294,0.147	0.125,0.077	0.119
ENSG00000011021.21	CLCN6	chr1	+	11828457	11828624	11828105	11828219	11829195	11829322	7,19	10,0	0,2	6,8	0.00342721	0.259,1.0	0.0,0.111	0.574
ENSG00000106404.13	CLDN15	chr7	-	101236746	101236886	101233768	101234442	101237364	101237750	4,0	38,39	13,3	24,15	0.00244579	0.05,0.0	0.213,0.091	-0.127
ENSG00000113240.12	CLK4	chr5	-	178619837	178619896	178616881	178618778	178623255	178623416	7,4	67,49	26,30	65,60	8.85275e-05	0.054,0.043	0.179,0.215	-0.149
ENSG00000113240.12	CLK4	chr5	-	178619837	178620673	178618693	178618778	178623255	178623416	6,3	67,49	23,18	65,60	0.00117658	0.043,0.03	0.15,0.13	-0.104
ENSG00000165959.11	CLMN	chr14	-	95194214	95194461	95193848	95193919	95194535	95194596	8,23	29,16	0,0	28,10	1.56057e-05	0.121,0.418	0.0,0.0	0.269
ENSG00000182372.7	CLN8	chr8	+	1758248	1758306	1755787	1756082	1770931	1771294	5,3	17,10	6,5	3,1	0.0153522	0.139,0.142	0.524,0.734	-0.488
ENSG00000074201.8	CLNS1A	chr11	-	77625718	77625815	77624962	77625070	77629762	77629899	14,7	1,5	7,14	0,0	0.00194415	0.875,0.412	1.0,1.0	-0.357
ENSG00000162129.12	CLPB	chr11	-	72402965	72403052	72380280	72380384	72430311	72430363	30,38	8,1	75,25	0,2	0.0376688	0.652,0.95	1.0,0.862	-0.13
ENSG00000103121.8	CMC2	chr16	-	80981805	80981877	80980769	80980879	80997313	80997429	174135	9,22	268256	3,6	0.000258828	0.906,0.754	0.978,0.955	-0.136
ENSG00000103121.8	CMC2	chr16	-	80981805	80981877	80975800	80976179	80997313	80997429	370327	44,57	527498	27,37	0.000601713	0.808,0.741	0.907,0.871	-0.115
ENSG00000103121.8	CMC2	chr16	-	80980769	80980879	80975935	80976179	80997313	80997429	198214	44,57	230286	27,37	0.0107147	0.692,0.652	0.81,0.794	-0.13
ENSG00000143771.11	CNIH4	chr1	+	224371329	224371423	224365878	224365991	224375794	224375998	153165	4,2	157131	8,17	0.00448832	0.95,0.976	0.908,0.794	0.112
ENSG00000064666.14	CNN2	chr19	+	1036066	1036246	1032558	1032696	1036415	1036562	2,29	3,7	7,11	1,0	0.0111383	0.25,0.674	0.778,1.0	-0.427
ENSG00000111596.11	CNOT2	chr12	+	70294236	70294294	70285399	70285586	70310894	70311017	27,49	11,17	18,12	25,16	0.00201001	0.575,0.614	0.284,0.292	0.307
ENSG00000111596.11	CNOT2	chr12	+	70329422	70329570	70319297	70319364	70335437	70335466	132,76	59,91	162229	47,44	0.00800921	0.528,0.295	0.633,0.722	-0.266
ENSG00000111596.11	CNOT2	chr12	+	70297758	70297879	70294236	70294294	70310894	70311017	7,8	30,39	9,12	15,7	0.0286822	0.104,0.093	0.231,0.462	-0.248
ENSG00000080802.18	CNOT4	chr7	-	135363853	135364066	135362998	135363186	135393917	135394415	23,23	0,1	46,23	8,8	0.00101488	1.0,0.92	0.742,0.59	0.294
ENSG00000080802.18	CNOT4	chr7	-	135363853	135363936	135361794	135363186	135393917	135394415	13,10	0,1	28,7	8,8	0.00169735	1.0,0.833	0.636,0.304	0.447
ENSG00000138767.12	CNOT6L	chr4	-	77744717	77744875	77742140	77742295	77748315	77748384	7,24	1,6	33,21	0,0	0.000492884	0.778,0.667	1.0,1.0	-0.277
ENSG00000155508.13	CNOT8	chr5	+	154863206	154863395	154858638	154858768	154870660	154870822	68,95	1,14	70,62	0,0	0.000810375	0.971,0.772	1.0,1.0	-0.129
ENSG00000115649.15	CNPPD1	chr2	-	219174145	219174207	219173349	219173467	219174777	219174906	64,76	5,9	235135	2,3	0.00151758	0.872,0.819	0.984,0.96	-0.127
ENSG00000106603.17	COA1	chr7	-	43650492	43650712	43648599	43648652	43729428	43729489	52,16	0,0	16,20	6,4	3.2715e-05	1.0,1.0	0.571,0.714	0.358
ENSG00000106603.17	COA1	chr7	-	43650611	43650712	43648599	43648652	43729428	43729483	10,22	0,0	22,34	6,4	0.00096821	1.0,1.0	0.647,0.81	0.271
ENSG00000106603.17	COA1	chr7	-	43633278	43633408	43608455	43609495	43639448	43639681	34,33	1,0	45,24	5,2	0.0270578	0.944,1.0	0.818,0.857	0.135
ENSG00000082438.15	COBLL1	chr2	-	164779654	164779785	164743686	164743875	164841155	164841243	0,1	30,24	8,4	16,6	0.000122029	0.0,0.02	0.2,0.25	-0.215
ENSG00000119723.15	COQ6	chr14	+	73955450	73955505	73953434	73953569	73955804	73956790	11,24	2,5	68,35	0,0	0.000537198	0.756,0.73	1.0,1.0	-0.257
ENSG00000119723.15	COQ6	chr14	+	73955450	73955509	73953434	73953569	73955804	73955928	53,55	2,5	116101	0,0	0.0112953	0.935,0.857	1.0,1.0	-0.104
ENSG00000203667.9	COX20	chr1	+	244841943	244842058	244835321	244835756	244842194	244842258	128163	6,4	110165	16,13	0.0222107	0.914,0.953	0.775,0.864	0.114
ENSG00000178741.11	COX5A	chr15	-	74929115	74929232	74923647	74923770	74937914	74938070	94127	8,5	194168	1,0	0.000462714	0.855,0.927	0.99,1.0	-0.104
ENSG00000178741.11	COX5A	chr15	-	74926774	74926887	74923647	74923770	74937914	74938080	6,8	8,5	3,5	1,0	0.0114163	0.273,0.444	0.6,1.0	-0.442
ENSG00000140848.16	CPNE2	chr16	+	57134774	57134826	57127848	57127903	57146084	57146321	24,13	7,1	40,24	0,0	0.000797711	0.665,0.883	1.0,1.0	-0.226
ENSG00000127054.18	CPSF3L	chr1	-	1314300	1314365	1313731	1313921	1314823	1314962	74,59	7,15	118103	0,0	1.51666e-07	0.847,0.673	1.0,1.0	-0.24
ENSG00000149532.15	CPSF7	chr11	-	61420546	61420573	61419948	61420094	61421389	61421553	8,12	8,9	64,49	7,1	1.84857e-05	0.422,0.493	0.87,0.973	-0.464
ENSG00000149532.15	CPSF7	chr11	-	61420469	61420573	61419948	61420094	61421389	61421608	43,56	8,9	163140	7,1	0.000702535	0.729,0.757	0.921,0.986	-0.211
ENSG00000149532.15	CPSF7	chr11	-	61420469	61420530	61419969	61420094	61421389	61421553	14,27	8,9	60,62	7,1	0.00291901	0.485,0.618	0.822,0.971	-0.345
ENSG00000113851.13	CRBN	chr3	-	3172505	3172646	3167633	3167793	3172775	3172925	6,10	58,72	29,26	49,61	0.00018	0.049,0.065	0.228,0.176	-0.145
ENSG00000005339.13	CREBBP	chr16	-	3777612	3777657	3774568	3774693	3778010	3778182	52,50	12,11	78,87	2,1	7.91317e-06	0.727,0.736	0.96,0.982	-0.239
ENSG00000095794.19	CREM	chr10	+	35148367	35148491	35126840	35127193	35206894	35207051	19,20	5,3	14,21	0,0	0.000803368	0.655,0.769	1.0,1.0	-0.288
ENSG00000095794.19	CREM	chr10	+	35179133	35179276	35148367	35148491	35206894	35207051	28,18	0,0	13,24	0,5	0.0306773	1.0,1.0	1.0,0.706	0.147
ENSG00000150938.9	CRIM1	chr2	+	36464533	36464655	36442614	36442735	36476888	36477071	55,79	12,6	82102	3,3	0.0278697	0.696,0.868	0.932,0.944	-0.156
ENSG00000058453.16	CROCC	chr1	+	16938399	16938483	16937640	16937737	16938908	16939142	5,1	0,0	31,5	5,3	0.00129913	1.0,1.0	0.756,0.455	0.394
ENSG00000058453.16	CROCC	chr1	+	16966407	16966571	16965998	16966119	16968202	16968418	35,20	0,0	66,40	7,5	0.0013434	1.0,1.0	0.825,0.8	0.188
ENSG00000215908.8	CROCCP2	chr1	-	16619844	16620024	16618968	16619103	16625774	16626005	15,15	0,1	8,23	5,5	0.00315559	1.0,0.882	0.444,0.697	0.371
ENSG00000215908.8	CROCCP2	chr1	-	16626352	16626499	16625774	16626005	16627144	16627289	17,39	1,0	48,25	4,3	0.0364127	0.895,1.0	0.857,0.806	0.116
ENSG00000080200.9	CRYBG3	chr3	+	97843194	97843261	97822039	97822355	97864216	97864647	12,17	4,7	24,12	1,0	0.000515019	0.607,0.556	0.925,1.0	-0.381
ENSG00000116791.13	CRYZ	chr1	-	74707102	74707204	74706898	74706994	74710097	74710247	45,47	20,21	138,80	3,3	3.35271e-11	0.529,0.528	0.958,0.93	-0.415
ENSG00000139631.18	CSAD	chr12	-	53171176	53171441	53170422	53170502	53171881	53171988	0,2	2,3	12,18	6,1	0.0119166	0.0,0.25	0.5,0.9	-0.575
ENSG00000009307.15	CSDE1	chr1	-	114730528	114730568	114730257	114730422	114732603	114732686	10,10	1,2	0,2	1,3	0.0145025	0.865,0.763	0.0,0.3	0.664
ENSG00000101266.16	CSNK2A1	chr20	-	527932	528049	508450	508660	543671	543821	22,14	73101	23,26	24,26	8.07674e-06	0.131,0.065	0.324,0.333	-0.231
ENSG00000104218.14	CSPP1	chr8	+	67172768	67172973	67172511	67172555	67175295	67175436	7,3	5,6	1,1	16,15	0.00313836	0.412,0.2	0.03,0.032	0.275
ENSG00000150527.16	CTAGE5	chr14	+	39320927	39321056	39319208	39319291	39326863	39327022	22,13	27,25	103,85	45,43	0.000768016	0.289,0.206	0.534,0.497	-0.268
ENSG00000150527.16	CTAGE5	chr14	+	39320882	39321056	39319208	39319291	39326863	39327022	16,9	27,25	70,51	45,43	0.00531187	0.229,0.153	0.438,0.372	-0.214
ENSG00000175029.16	CTBP2	chr10	-	125074742	125074843	125038996	125039155	125110989	125111093	18,5	27,27	3,4	33,33	0.0351225	0.25,0.085	0.043,0.057	0.118
ENSG00000248727.5	CTC-236F12.4	chr5	-	56464008	56464116	56457794	56457943	56467711	56467812	7,5	0,0	23,19	8,1	0.00274032	1.0,1.0	0.59,0.905	0.252
ENSG00000250222.1	CTC-338M12.5	chr5	+	181193341	181193467	181192069	181192140	181194233	181194428	5,35	0,2	5,5	8,2	0.00096821	1.0,0.897	0.238,0.556	0.551
ENSG00000268362.5	CTD-2017D11.1	chr19	+	24057930	24058106	24049409	24049548	24063815	24063941	4,3	0,0	8,20	2,7	0.0008487	1.0,1.0	0.667,0.588	0.373
ENSG00000085733.15	CTTN	chr11	+	70421469	70421563	70420399	70420510	70422939	70422995	359222	117,49	588506	84,65	0.0016578	0.605,0.694	0.778,0.796	-0.138
ENSG00000085733.15	CTTN	chr11	+	70421469	70421536	70420222	70420510	70422939	70422995	330202	117,49	521455	84,65	0.00265596	0.592,0.68	0.761,0.783	-0.136
ENSG00000112659.13	CUL9	chr6	+	43206320	43206510	43206006	43206235	43213148	43213294	22,18	0,0	32,39	2,5	0.00661663	1.0,1.0	0.889,0.796	0.157
ENSG00000173681.16	CXorf23	chrX	-	19954139	19954210	19953777	19953892	19955390	19955566	0,1	28,18	7,0	12,7	0.0207823	0.0,0.027	0.226,0.0	-0.1
ENSG00000108669.16	CYTH1	chr17	-	78696006	78696009	78692416	78692493	78698268	78698380	1,0	18,21	9,0	9,5	0.0164791	0.051,0.0	0.493,0.0	-0.221
ENSG00000180902.16	D2HGDH	chr2	+	241750150	241750294	241744708	241744877	241755848	241756014	30,28	5,6	16,18	1,0	0.0085414	0.75,0.7	0.889,1.0	-0.22
ENSG00000132676.15	DAP3	chr1	+	155727645	155727738	155725991	155726019	155731355	155731415	0,1	11,6	5,2	0,5	0.0113526	0.0,0.077	1.0,0.167	-0.545
ENSG00000035664.11	DAPK2	chr15	-	63924815	63924861	63912107	63912197	63925940	63926093	91,81	14,26	4,13	1,0	0.0230034	0.798,0.655	0.709,1.0	-0.128
ENSG00000071626.16	DAZAP1	chr19	+	1425877	1425960	1422347	1422396	1428841	1428995	349283	40,75	587657	18,13	2.5608e-10	0.814,0.654	0.942,0.962	-0.218
ENSG00000136279.18	DBNL	chr7	+	44051829	44051942	44050224	44050280	44052866	44052941	212141	22,6	336415	5,0	4.05085e-07	0.828,0.922	0.971,1.0	-0.111
ENSG00000138231.12	DBR1	chr3	-	138163777	138163858	138163348	138163494	138167080	138167305	71,30	3,14	119156	2,0	0.000307005	0.922,0.517	0.967,1.0	-0.264
ENSG00000115827.13	DCAF17	chr2	+	171476859	171476950	171468887	171469030	171477986	171478070	14,8	0,0	26,15	0,9	0.0146516	1.0,1.0	1.0,0.455	0.272
ENSG00000132716.18	DCAF8	chr1	-	160225061	160225111	160224441	160224549	160225590	160225663	46,46	13,24	141126	7,10	1.46033e-05	0.675,0.53	0.922,0.881	-0.299
ENSG00000132716.18	DCAF8	chr1	-	160225061	160225119	160224441	160224549	160225590	160225663	104,63	13,24	251237	7,10	0.00010987	0.815,0.591	0.952,0.929	-0.238
ENSG00000132716.18	DCAF8	chr1	-	160225061	160225142	160224441	160224549	160225590	160225663	57,46	13,24	145141	7,10	0.000126899	0.687,0.489	0.912,0.876	-0.306
ENSG00000132716.18	DCAF8	chr1	-	160261284	160261358	160243959	160244034	160262448	160262531	54,33	5,3	100122	0,1	0.00244302	0.844,0.846	1.0,0.984	-0.147
ENSG00000132716.18	DCAF8	chr1	-	160261284	160261350	160243959	160244034	160262448	160262528	54,33	5,3	96122	0,1	0.00272302	0.848,0.851	1.0,0.984	-0.143
ENSG00000132716.18	DCAF8	chr1	-	160220458	160220691	160218848	160218968	160222650	160222781	7,4	8,5	6,3	34,43	0.0115473	0.304,0.286	0.081,0.034	0.237
ENSG00000132716.18	DCAF8	chr1	-	160220458	160220564	160218848	160218968	160222650	160222775	7,4	8,5	7,3	34,43	0.0179526	0.304,0.286	0.093,0.034	0.231
ENSG00000132716.18	DCAF8	chr1	-	160261284	160261358	160243959	160244034	160262116	160262451	68,37	17,10	117145	14,13	0.0457296	0.667,0.649	0.807,0.848	-0.169
ENSG00000132716.18	DCAF8	chr1	-	160261284	160261397	160243959	160244034	160262116	160262451	54,35	17,10	96125	14,13	0.0498978	0.614,0.636	0.774,0.828	-0.176
ENSG00000152457.17	DCLRE1C	chr10	-	14947524	14947609	14945104	14945189	14949035	14949087	4,0	11,10	30,19	25,18	0.00351295	0.154,0.0	0.375,0.345	-0.283
ENSG00000272886.5	DCP1A	chr3	-	53304176	53304290	53292068	53292827	53312240	53312379	32,54	1,0	36,41	1,6	0.0229026	0.941,1.0	0.947,0.774	0.11
ENSG00000172795.15	DCP2	chr5	+	112981041	112981171	112976735	112976986	112983973	112984651	15,15	4,5	3,2	12,3	0.0013838	0.652,0.6	0.111,0.25	0.446
ENSG00000109184.14	DCUN1D4	chr4	+	51887122	51887244	51886567	51886638	51891759	51891851	32,55	108,85	9,14	112,99	2.66408e-05	0.129,0.244	0.039,0.066	0.134
ENSG00000109184.14	DCUN1D4	chr4	+	51887100	51887244	51886567	51886638	51891759	51891851	31,54	108,85	9,14	112,99	4.06661e-05	0.126,0.241	0.039,0.066	0.131
ENSG00000109184.14	DCUN1D4	chr4	+	51887145	51887244	51886567	51886638	51891759	51891851	30,54	108,85	10,14	112,99	0.000101572	0.122,0.241	0.043,0.066	0.127
ENSG00000109184.14	DCUN1D4	chr4	+	51908919	51908979	51899269	51899378	51911069	51911174	3,26	35,26	3,0	42,17	0.00708255	0.044,0.352	0.037,0.0	0.179
ENSG00000100523.14	DDHD1	chr14	-	53051843	53051927	53043967	53046949	53054437	53054629	19,6	43,49	37,38	38,22	0.000213622	0.181,0.058	0.327,0.463	-0.276
ENSG00000085788.13	DDHD2	chr8	+	38240274	38240364	38238088	38238209	38242249	38242385	7,30	7,11	25,18	0,0	2.50971e-06	0.333,0.577	1.0,1.0	-0.545
ENSG00000204580.11	DDR1	chr6	+	30885624	30885680	30883084	30883165	30888687	30889010	10,14	30,35	26,17	22,14	0.00832129	0.157,0.183	0.398,0.405	-0.232
ENSG00000013573.16	DDX11	chr12	+	31101832	31101982	31101026	31101130	31102242	31102311	14,11	5,1	41,37	0,2	0.0289244	0.583,0.846	1.0,0.902	-0.237
ENSG00000013573.16	DDX11	chr12	+	31078177	31078288	31073867	31074091	31078389	31078537	3,1	31,26	4,14	40,15	0.0407622	0.046,0.019	0.048,0.318	-0.15
ENSG00000215301.9	DDX3X	chrX	+	41339038	41339083	41337408	41337465	41341483	41341616	371271	16,32	405411	1,4	5.22197e-09	0.934,0.839	0.996,0.984	-0.103
ENSG00000198231.12	DDX42	chr17	+	63799563	63799625	63798037	63798099	63800467	63800509	78,74	141175	137182	59,66	0	0.228,0.184	0.554,0.596	-0.369
ENSG00000198231.12	DDX42	chr17	+	63799588	63799625	63798037	63798099	63800467	63800617	211208	141175	407498	59,66	0	0.497,0.44	0.82,0.833	-0.358
ENSG00000198231.12	DDX42	chr17	+	63799597	63799625	63798037	63798099	63800467	63800509	71,63	141175	125172	59,66	0	0.267,0.206	0.605,0.653	-0.393
ENSG00000198231.12	DDX42	chr17	+	63774188	63774376	63773883	63774091	63787033	63787270	24,22	0,0	31,45	6,2	0.00538566	1.0,1.0	0.721,0.918	0.18
ENSG00000111364.15	DDX55	chr12	+	123605930	123606159	123602098	123602256	123607599	123607662	6,9	0,0	21,11	4,1	0.0142073	1.0,1.0	0.724,0.846	0.215
ENSG00000111364.15	DDX55	chr12	+	123605930	123605994	123602096	123602256	123607599	123607770	3,6	0,0	21,9	4,1	0.0167609	1.0,1.0	0.734,0.826	0.22
ENSG00000140995.16	DEF8	chr16	+	89949416	89949513	89948794	89948814	89954242	89954376	7,4	2,5	31,10	1,1	0.00819081	0.636,0.286	0.939,0.833	-0.425
ENSG00000119522.15	DENND1A	chr9	-	123387729	123387858	123383654	123383913	123403401	123403490	4,3	12,2	1,0	16,12	0.0108559	0.143,0.429	0.03,0.0	0.271
ENSG00000119522.15	DENND1A	chr9	-	123667025	123667079	123630375	123630476	123671290	123671371	45,67	0,0	48,40	0,6	0.0415162	1.0,1.0	1.0,0.791	0.105
ENSG00000213047.11	DENND1B	chr1	-	197674119	197674169	197672036	197672156	197715030	197715074	45,32	7,1	58,72	0,0	0.00251856	0.791,0.95	1.0,1.0	-0.129
ENSG00000105339.10	DENND3	chr8	+	141160631	141160787	141155848	141155970	141163332	141163429	7,13	6,4	5,12	0,0	4.96673e-05	0.368,0.619	1.0,1.0	-0.506
ENSG00000198837.9	DENND4B	chr1	-	153939588	153939804	153938899	153939045	153940155	153940256	63,56	6,3	77,65	0,0	0.0028327	0.84,0.903	1.0,1.0	-0.129
ENSG00000137145.20	DENND4C	chr9	+	19371755	19371820	19369836	19369987	19372036	19372858	68,83	4,9	134101	0,0	7.83699e-05	0.899,0.828	1.0,1.0	-0.137
ENSG00000184014.7	DENND5A	chr11	-	9176771	9176902	9170626	9170777	9178131	9178366	2,8	9,11	0,0	18,26	0.00038138	0.1,0.267	0.0,0.0	0.183
ENSG00000184014.7	DENND5A	chr11	-	9170626	9170777	9169855	9169949	9178131	9178366	60108	10,14	61,62	0,2	0.000396306	0.75,0.794	1.0,0.939	-0.198
ENSG00000174839.12	DENND6A	chr3	-	57679486	57679725	57672399	57672438	57692781	57693089	4,0	8,24	9,18	21,15	0.018021	0.2,0.0	0.176,0.375	-0.175
ENSG00000128185.9	DGCR6L	chr22	-	20316118	20316219	20315335	20315476	20319638	20319799	61,74	15,9	280276	6,18	0.00240435	0.67,0.804	0.959,0.885	-0.185
ENSG00000077044.9	DGKD	chr2	+	233447857	233447905	233446711	233446796	233448086	233448181	23,15	54,39	4,2	33,49	0.000440459	0.203,0.187	0.068,0.024	0.149
ENSG00000102780.16	DGKH	chr13	+	42221268	42221394	42219685	42219794	42229098	42229250	7,4	23,35	12,14	19,22	0.031795	0.132,0.054	0.24,0.241	-0.147
ENSG00000114956.19	DGUOK	chr2	+	73957124	73957240	73946718	73946906	73958145	73958245	37,37	78,68	93,79	65,94	0.0164584	0.192,0.214	0.417,0.296	-0.153
ENSG00000157326.18	DHRS4	chr14	+	23966282	23966417	23965931	23965983	23967210	23967266	34,39	0,2	89,44	8,7	0.0326546	1.0,0.907	0.848,0.759	0.15
ENSG00000067248.9	DHX29	chr5	-	55298590	55298664	55297284	55297398	55307386	55307694	58,52	7,1	146148	0,0	0.00249512	0.806,0.963	1.0,1.0	-0.115
ENSG00000089876.11	DHX32	chr10	-	125885628	125885676	125880542	125881071	125896217	125896436	9,10	18,12	3,0	16,3	0.0496977	0.23,0.333	0.101,0.0	0.231
ENSG00000101452.14	DHX35	chr20	+	39023689	39023767	39021840	39021935	39025229	39025359	13,16	0,0	43,18	0,7	0.0190507	1.0,1.0	1.0,0.563	0.219
ENSG00000135829.16	DHX9	chr1	+	182855576	182855728	182854040	182854178	182856531	182856578	50,51	132,62	50,49	467301	2.12805e-07	0.159,0.291	0.051,0.075	0.162
ENSG00000135829.16	DHX9	chr1	+	182855576	182855713	182854040	182854178	182856531	182856572	86,83	132,62	82,95	467301	7.75549e-07	0.246,0.401	0.081,0.136	0.215
ENSG00000131504.15	DIAPH1	chr5	-	141588223	141588250	141587041	141587197	141618797	141619055	12,2	42,26	25,17	26,29	0.00777667	0.172,0.053	0.412,0.299	-0.243
ENSG00000235706.7	DICER1-AS1	chr14	+	95179348	95179378	95158875	95159035	95179498	95179925	3,14	11,25	2,0	30,22	0.000406426	0.162,0.284	0.045,0.0	0.2
ENSG00000151240.16	DIP2C	chr10	-	359206	359376	357827	357937	362489	362691	5,1	8,7	0,0	13,9	0.0160525	0.238,0.067	0.0,0.0	0.152
ENSG00000151240.16	DIP2C	chr10	-	484780	484948	472438	472549	486458	486530	13,15	24,38	23,20	15,21	0.0497581	0.213,0.165	0.434,0.323	-0.19
ENSG00000083520.14	DIS3	chr13	-	72781288	72781356	72778186	72778380	72781604	72781925	8,20	2,5	37,43	1,1	0.0117994	0.671,0.671	0.95,0.956	-0.282
ENSG00000083520.14	DIS3	chr13	-	72781288	72781356	72780845	72781003	72781604	72781925	2,7	21,9	20,17	13,12	0.0182697	0.046,0.284	0.44,0.42	-0.265
ENSG00000144535.19	DIS3L2	chr2	+	232259840	232260685	232249238	232249346	232263206	232263440	4,2	10,9	0,0	23,7	0.021273	0.167,0.1	0.0,0.0	0.134
ENSG00000176124.11	DLEU1	chr13	+	50415088	50415202	50390197	50390291	50433412	50433550	10,18	0,0	23,16	1,4	0.0199172	1.0,1.0	0.92,0.667	0.206
ENSG00000075711.20	DLG1	chr3	-	197149742	197149796	197142717	197142768	197194424	197194589	191157	89,88	276282	60,82	0.000938901	0.55,0.504	0.724,0.662	-0.166
ENSG00000075711.20	DLG1	chr3	-	197076585	197076682	197069218	197069260	197081050	197081117	14,7	5,2	24,31	0,2	0.0105285	0.583,0.636	1.0,0.886	-0.334
ENSG00000075711.20	DLG1	chr3	-	197076585	197076685	197069218	197069260	197081050	197081117	14,9	5,2	23,35	0,2	0.0141166	0.583,0.692	1.0,0.897	-0.311
ENSG00000100206.9	DMC1	chr22	-	38552665	38552707	38538538	38538612	38555356	38555409	12,12	6,2	19,27	1,0	0.00223901	0.558,0.791	0.923,1.0	-0.287
ENSG00000135164.18	DMTF1	chr7	+	87159638	87159821	87154389	87154528	87163494	87163617	12,7	48,18	11,24	4,14	0.000110628	0.111,0.163	0.579,0.462	-0.383
ENSG00000135164.18	DMTF1	chr7	+	87163238	87163332	87154389	87154528	87163494	87163617	7,16	48,18	13,19	4,14	0.0235857	0.068,0.308	0.619,0.404	-0.324
ENSG00000172869.14	DMXL1	chr5	+	119238988	119239080	119237321	119237414	119240418	119240471	66,73	24,9	80,68	0,4	0.000506325	0.579,0.802	1.0,0.895	-0.257
ENSG00000172869.14	DMXL1	chr5	+	119110154	119110283	119105222	119105258	119114474	119114541	31,44	1,0	22,24	6,0	0.0404429	0.939,1.0	0.647,1.0	0.146
ENSG00000104093.13	DMXL2	chr15	-	51453549	51453641	51450194	51450346	51455150	51455228	21,29	0,0	24,28	0,6	0.0148161	1.0,1.0	1.0,0.7	0.15
ENSG00000104093.13	DMXL2	chr15	-	51451644	51451697	51450128	51450346	51455150	51455228	26,38	0,0	33,39	0,6	0.0291506	1.0,1.0	1.0,0.789	0.105
ENSG00000165506.14	DNAAF2	chr14	-	49628011	49628155	49625173	49626048	49633286	49635230	32,30	54,44	70,59	62,44	0.0437706	0.229,0.254	0.361,0.401	-0.14
ENSG00000077232.16	DNAJC10	chr2	+	182736248	182736386	182732498	182732542	182740298	182740388	63,39	7,3	221217	3,0	0.000471903	0.818,0.867	0.974,1.0	-0.144
ENSG00000138246.15	DNAJC13	chr3	+	132484362	132484488	132483374	132483577	132484587	132484672	12,13	22,30	2,8	46,79	0.000287973	0.214,0.178	0.021,0.048	0.162
ENSG00000138246.15	DNAJC13	chr3	+	132484362	132484493	132483374	132483577	132484587	132484672	9,8	22,30	2,3	46,79	0.000526177	0.17,0.118	0.021,0.019	0.124
ENSG00000135392.15	DNAJC14	chr12	-	55829488	55829636	55827251	55828714	55830695	55830781	7,7	3,2	19,10	0,0	0.00167894	0.538,0.636	1.0,1.0	-0.413
ENSG00000205981.6	DNAJC19	chr3	-	180986942	180987022	180985925	180985996	180988022	180988096	53,60	47,60	174226	26,40	0	0.361,0.333	0.77,0.739	-0.407
ENSG00000115137.11	DNAJC27	chr2	-	24953549	24953635	24951393	24951554	24957042	24957165	1,0	18,11	3,3	8,5	0.0196086	0.027,0.0	0.158,0.231	-0.181
ENSG00000168259.14	DNAJC7	chr17	-	42003358	42003557	42000481	42000570	42017339	42017423	1,3	21,18	6,19	30,27	0.034394	0.023,0.077	0.091,0.26	-0.126
ENSG00000013563.13	DNASE1L1	chrX	-	154409417	154409813	154409111	154409196	154411890	154412089	13,2	0,0	9,23	5,0	0.037289	1.0,1.0	0.474,1.0	0.263
ENSG00000013563.13	DNASE1L1	chrX	-	154409417	154409675	154409111	154409196	154411890	154412091	17,5	0,0	9,29	5,0	0.041516	1.0,1.0	0.474,1.0	0.263
ENSG00000087470.17	DNM1L	chr12	+	32737864	32737942	32737104	32737161	32738263	32738296	0,1	20,20	17,19	31,40	1.3072e-05	0.0,0.024	0.215,0.192	-0.192
ENSG00000087470.17	DNM1L	chr12	+	32737864	32737942	32737104	32737161	32740063	32740240	0,2	16,5	16,15	29,24	0.00614416	0.0,0.167	0.216,0.238	-0.143
ENSG00000079805.16	DNM2	chr19	+	10797379	10797518	10795371	10795439	10798485	10798572	25,16	0,7	10,16	0,0	0.0145458	1.0,0.533	1.0,1.0	-0.234
ENSG00000119772.16	DNMT3A	chr2	-	25236935	25237005	25235706	25235825	25239129	25239215	79,55	13,1	106,85	2,0	0.00341592	0.754,0.965	0.964,1.0	-0.123
ENSG00000088305.18	DNMT3B	chr20	+	32793535	32793595	32792610	32792770	32795408	32795534	0,0	9,4	5,2	15,22	0.0426382	0.0,0.0	0.153,0.047	-0.1
ENSG00000147459.17	DOCK5	chr8	+	25368191	25368250	25366869	25366970	25368570	25368687	60,40	4,3	88,99	0,0	0.00955933	0.891,0.879	1.0,1.0	-0.115
ENSG00000130158.13	DOCK6	chr19	-	11229297	11229390	11229000	11229035	11233202	11233366	3,10	12,20	23,16	3,0	1.20707e-07	0.111,0.2	0.793,1.0	-0.741
ENSG00000130158.13	DOCK6	chr19	-	11229297	11229390	11229000	11229035	11232184	11232289	0,0	6,3	14,11	10,3	2.4647e-05	0.0,0.0	0.412,0.647	-0.529
ENSG00000130158.13	DOCK6	chr19	-	11232184	11232289	11228939	11229035	11233202	11233366	9,3	12,20	11,6	3,0	0.00238169	0.273,0.07	0.647,1.0	-0.652
ENSG00000116641.16	DOCK7	chr1	-	62583183	62583254	62578827	62578966	62586506	62586624	43,42	6,4	59,43	0,0	0.000482528	0.782,0.84	1.0,1.0	-0.189
ENSG00000083097.14	DOPEY1	chr6	+	83164659	83164719	83162789	83162919	83167861	83168331	6,1	44,30	15,16	23,26	0.000135495	0.069,0.018	0.261,0.25	-0.212
ENSG00000083097.14	DOPEY1	chr6	+	83154010	83154043	83153510	83153620	83154179	83154273	10,7	0,0	15,12	5,1	0.00410333	1.0,1.0	0.673,0.892	0.218
ENSG00000083097.14	DOPEY1	chr6	+	83153893	83154043	83153510	83153620	83154179	83154241	66,32	0,0	49,55	5,1	0.0410048	1.0,1.0	0.831,0.965	0.102
ENSG00000104885.17	DOT1L	chr19	+	2207573	2207680	2206728	2206797	2208934	2208976	42,62	5,3	25,18	0,0	0.0111149	0.808,0.912	1.0,1.0	-0.14
ENSG00000148399.11	DPH7	chr9	-	137576308	137576402	137575708	137576167	137578624	137578890	25,23	3,0	19,29	12,5	0.0374903	0.806,1.0	0.442,0.744	0.31
ENSG00000000419.12	DPM1	chr20	-	50941104	50941209	50940864	50940955	50942030	50942126	30,38	9,6	66,89	2,0	3.15864e-05	0.625,0.76	0.943,1.0	-0.279
ENSG00000176978.13	DPP7	chr9	-	137112748	137112805	137112111	137112230	137112952	137113119	70,67	24,9	131,98	7,2	0.000541386	0.618,0.805	0.912,0.965	-0.227
ENSG00000074603.18	DPP8	chr15	-	65454262	65454415	65451959	65452102	65455653	65455691	32,18	0,0	44,32	5,2	0.0102885	1.0,1.0	0.815,0.889	0.148
ENSG00000074603.18	DPP8	chr15	-	65500605	65500779	65497863	65498032	65507242	65507355	134,91	17,10	110160	1,11	0.0496815	0.798,0.82	0.982,0.879	-0.122
ENSG00000142002.16	DPP9	chr19	-	4722194	4722304	4719850	4719941	4722498	4722551	2,7	8,11	0,0	25,11	0.000851116	0.111,0.241	0.0,0.0	0.176
ENSG00000173852.13	DPY19L1	chr7	-	34989354	34989447	34973513	34973605	34989883	34989941	9,2	15,10	2,2	26,32	0.0259282	0.231,0.091	0.037,0.03	0.128
ENSG00000151640.12	DPYSL4	chr10	+	132202645	132202825	132201945	132202116	132203761	132203926	25,56	5,6	5,5	0,0	0.00629602	0.714,0.824	1.0,1.0	-0.231
ENSG00000136048.13	DRAM1	chr12	+	101920108	101920201	101914173	101914232	101921215	101921542	166,55	19,4	22,37	0,0	0.000745559	0.814,0.873	1.0,1.0	-0.157
ENSG00000113360.16	DROSHA	chr5	-	31467141	31467166	31466181	31466281	31467938	31468006	2,5	11,11	0,0	59,36	0.00164076	0.119,0.253	0.0,0.0	0.186
ENSG00000113360.16	DROSHA	chr5	-	31531449	31531521	31530797	31530924	31531989	31532109	19,14	0,0	22,57	6,0	0.0331501	1.0,1.0	0.647,1.0	0.176
ENSG00000113360.16	DROSHA	chr5	-	31531449	31531525	31530797	31530924	31531989	31532109	29,24	0,0	32,67	6,0	0.0409257	1.0,1.0	0.727,1.0	0.137
ENSG00000157538.13	DSCR3	chr21	-	37233361	37233442	37232376	37232451	37238459	37238609	84117	44,48	124120	19,25	0.001055	0.488,0.549	0.765,0.706	-0.217
ENSG00000151914.18	DST	chr6	-	56463045	56463156	56460130	56460254	56463564	56463764	24,12	79,35	52,65	11,14	0	0.132,0.146	0.703,0.699	-0.562
ENSG00000186704.9	DTX2P1	chr7	+	77003288	77003449	77002162	77002321	77004217	77004308	1,0	23,10	3,2	6,7	0.0499447	0.021,0.0	0.2,0.125	-0.152
ENSG00000168393.12	DTYMK	chr2	-	241680228	241680319	241678451	241678649	241685768	241685876	71,43	10,13	311276	21,15	0.0142174	0.78,0.623	0.881,0.902	-0.19
ENSG00000169718.17	DUS1L	chr17	-	82063467	82063518	82062860	82062973	82064125	82064255	56,55	12,2	195204	1,1	3.93744e-05	0.731,0.941	0.991,0.992	-0.156
ENSG00000169718.17	DUS1L	chr17	-	82058340	82058416	82057879	82058091	82058780	82059141	14,14	0,6	72,57	0,0	0.0110949	1.0,0.538	1.0,1.0	-0.231
ENSG00000167264.17	DUS2	chr16	+	68025414	68025494	68023322	68023351	68038005	68038149	12,5	0,0	11,13	1,3	0.0487237	1.0,1.0	0.846,0.684	0.235
ENSG00000105865.10	DUS4L	chr7	+	107573703	107573821	107571144	107571266	107575187	107575310	41,54	15,8	65,80	2,3	0.00129047	0.577,0.771	0.942,0.93	-0.262
ENSG00000105865.10	DUS4L	chr7	+	107571127	107571266	107567049	107567186	107575187	107575310	15,9	0,0	2,3	1,3	0.00131327	1.0,1.0	0.5,0.333	0.584
ENSG00000105865.10	DUS4L	chr7	+	107573703	107573883	107571144	107571266	107575187	107575310	43,47	15,8	42,49	2,3	0.0140802	0.589,0.746	0.913,0.891	-0.235
ENSG00000111266.8	DUSP16	chr12	-	12554535	12554659	12521080	12521463	12560999	12561077	11,6	3,2	13,11	0,0	0.0035201	0.647,0.6	1.0,1.0	-0.377
ENSG00000111266.8	DUSP16	chr12	-	12504510	12504686	12500518	12500682	12519861	12520000	10,5	73,89	10,8	38,17	0.0294393	0.064,0.027	0.116,0.19	-0.107
ENSG00000107404.17	DVL1	chr1	-	1342688	1342758	1341769	1342156	1348895	1349350	63,66	10,5	54,53	0,3	0.0396881	0.76,0.869	1.0,0.899	-0.135
ENSG00000161202.17	DVL3	chr3	+	184165112	184165188	184164795	184164931	184165421	184165491	48,66	11,7	66,95	3,0	0.000823418	0.686,0.825	0.917,1.0	-0.203
ENSG00000138036.18	DYNC2LI1	chr2	+	43795886	43795958	43794456	43794643	43796717	43796741	37,30	3,5	73,67	0,0	0.000637623	0.86,0.75	1.0,1.0	-0.195
ENSG00000138036.18	DYNC2LI1	chr2	+	43795889	43795958	43794456	43794643	43796717	43796795	77,55	3,5	81,66	0,0	0.00972106	0.929,0.848	1.0,1.0	-0.111
ENSG00000157540.19	DYRK1A	chr21	+	37430268	37430400	37420324	37420384	37472683	37472715	18,30	24,17	12,6	35,33	0.0038415	0.273,0.469	0.146,0.083	0.257
ENSG00000167967.15	E4F1	chr16	+	2233437	2233647	2233010	2233183	2233884	2233990	20,14	12,4	69,58	0,2	1.18816e-06	0.455,0.636	1.0,0.935	-0.422
ENSG00000103356.15	EARS2	chr16	-	23553043	23553123	23552148	23552304	23557204	23557364	5,7	21,12	3,3	42,50	0.0217718	0.106,0.226	0.034,0.029	0.135
ENSG00000093144.18	ECHDC1	chr6	-	127316449	127316502	127314815	127314896	127327001	127327144	20,14	27,39	114107	33,36	6.16845e-08	0.298,0.171	0.665,0.63	-0.413
ENSG00000121310.16	ECHDC2	chr1	-	52905033	52906611	52904645	52904833	52907867	52907954	24,18	16,9	45,37	7,7	0.0167927	0.429,0.5	0.763,0.725	-0.279
ENSG00000121310.16	ECHDC2	chr1	-	52906518	52906611	52905033	52905090	52907867	52907954	3,2	7,5	35,21	5,18	0.0419519	0.176,0.167	0.778,0.368	-0.401
ENSG00000121310.16	ECHDC2	chr1	-	52898579	52898719	52897436	52897484	52899173	52899224	6,0	7,5	2,0	30,29	0.0466882	0.3,0.0	0.032,0.0	0.134
ENSG00000114346.13	ECT2	chr3	+	172760132	172760263	172758979	172759069	172761609	172761634	187210	18,11	264292	0,0	9.81875e-09	0.839,0.905	1.0,1.0	-0.128
ENSG00000114346.13	ECT2	chr3	+	172760160	172760263	172758979	172759069	172761609	172761634	189210	18,11	263295	0,0	9.85074e-09	0.84,0.905	1.0,1.0	-0.127
ENSG00000134109.10	EDEM1	chr3	+	5210174	5210248	5208092	5208263	5211119	5211406	92,53	25,18	82,62	7,1	0.000227552	0.648,0.596	0.854,0.969	-0.289
ENSG00000102189.16	EEA1	chr12	-	92821052	92821116	92819307	92819511	92826165	92826285	0,0	3,24	10,9	28,37	0.00102144	0.0,0.0	0.158,0.113	-0.136
ENSG00000102189.16	EEA1	chr12	-	92891628	92891721	92864859	92864987	92929042	92929327	15,29	3,2	21,15	0,0	0.0243768	0.714,0.879	1.0,1.0	-0.204
ENSG00000074266.17	EED	chr11	+	86270082	86270157	86267894	86268561	86276979	86277138	3,3	23,36	51,20	64,56	0.000475708	0.061,0.04	0.285,0.152	-0.168
ENSG00000074266.17	EED	chr11	+	86268455	86268561	86266082	86266216	86276979	86277138	43,67	8,15	104,90	5,4	0.00298058	0.729,0.691	0.912,0.918	-0.205
ENSG00000104529.17	EEF1D	chr8	-	143590607	143590735	143589694	143590081	143592646	143592893	47,40	30,44	56,50	15,22	0.0458989	0.439,0.313	0.651,0.532	-0.216
ENSG00000169242.11	EFNA1	chr1	+	155133502	155133546	155131203	155131634	155133729	155133780	84120	17,19	49,95	3,1	0.000342254	0.754,0.796	0.91,0.983	-0.171
ENSG00000184349.12	EFNA5	chr5	-	107387234	107387315	107376888	107381376	107387705	107387771	23,32	3,5	20,41	0,0	0.0014196	0.793,0.762	1.0,1.0	-0.222
ENSG00000084710.13	EFR3B	chr2	+	25133382	25133434	25132902	25133014	25135466	25135639	31,11	1,5	30,22	0,0	0.00721513	0.947,0.56	1.0,1.0	-0.246
ENSG00000181090.17	EHMT1	chr9	+	137650859	137651037	137619002	137619049	137710966	137711030	1,0	6,9	3,1	2,1	0.0349232	0.077,0.0	0.429,0.333	-0.343
ENSG00000204371.11	EHMT2	chr6	-	31888968	31889070	31888598	31888747	31889227	31889342	19,26	56,77	72,98	42,37	1.26152e-10	0.145,0.144	0.462,0.57	-0.372
ENSG00000204371.11	EHMT2	chr6	-	31893361	31893662	31892825	31892910	31896262	31896504	42,29	44,56	5,2	72,35	1.66321e-08	0.323,0.206	0.034,0.028	0.234
ENSG00000070785.16	EIF2B3	chr1	-	44857703	44857807	44850777	44851003	44874677	44874826	28,20	5,1	100,51	1,0	0.00857545	0.737,0.909	0.98,1.0	-0.167
ENSG00000143486.15	EIF2D	chr1	-	206599462	206599612	206599002	206599092	206600262	206600308	133129	17,27	182229	4,18	0.00288886	0.796,0.705	0.958,0.864	-0.161
ENSG00000143486.15	EIF2D	chr1	-	206599732	206599836	206599002	206599092	206600262	206600308	131183	17,27	156204	4,18	0.0409257	0.794,0.772	0.951,0.85	-0.117
ENSG00000147677.10	EIF3H	chr8	-	116655855	116656005	116646470	116646603	116755665	116755797	9,12	2,4	7,5	0,0	0.000994999	0.692,0.6	1.0,1.0	-0.354
ENSG00000084623.11	EIF3I	chr1	+	32226148	32226283	32224409	32224475	32228498	32228609	4,1	9,4	0,0	4,11	0.04255	0.182,0.111	0.0,0.0	0.146
ENSG00000063046.17	EIF4B	chr12	+	53025226	53025345	53022492	53022606	53027781	53027919	5,22	10,11	1,1	15,13	0.000442973	0.2,0.5	0.032,0.037	0.316
ENSG00000114867.19	EIF4G1	chr3	+	184316071	184316218	184315762	184315856	184317320	184317431	67,66	7,5	157155	2,3	0.0126671	0.827,0.868	0.975,0.963	-0.122
ENSG00000114867.19	EIF4G1	chr3	+	184316135	184316218	184315762	184315856	184317320	184317431	67,66	7,5	153154	2,3	0.0136267	0.827,0.868	0.975,0.962	-0.121
ENSG00000126767.17	ELK1	chrX	-	47649920	47650026	47641231	47641475	47650422	47650591	30,39	25,31	22,26	50,64	0.0016239	0.375,0.386	0.18,0.169	0.206
ENSG00000158711.13	ELK4	chr1	-	205627741	205627874	205623675	205623891	205631631	205631962	4,1	57,17	8,5	17,17	0.0155725	0.034,0.029	0.19,0.128	-0.128
ENSG00000066322.12	ELOVL1	chr1	-	43367485	43367618	43365563	43365623	43367914	43368007	19,13	19,16	6,2	38,11	0.000994999	0.333,0.289	0.073,0.083	0.233
ENSG00000066322.12	ELOVL1	chr1	-	43365185	43365260	43364927	43365008	43365563	43365623	135108	1,2	168165	20,6	0.00201198	0.985,0.964	0.808,0.932	0.104
ENSG00000066322.12	ELOVL1	chr1	-	43364618	43364647	43364323	43364460	43364737	43364794	58,55	8,2	77,55	0,0	0.00244479	0.838,0.952	1.0,1.0	-0.105
ENSG00000134759.13	ELP2	chr18	+	36138794	36138872	36138269	36138426	36142825	36142947	149106	9,8	499493	4,2	1.28548e-05	0.892,0.869	0.984,0.992	-0.107
ENSG00000213853.9	EMP2	chr16	-	10547908	10548030	10547539	10547677	10558993	10559154	6,2	0,0	16,9	3,2	0.0133037	1.0,1.0	0.727,0.692	0.29
ENSG00000154380.17	ENAH	chr1	-	225517195	225517306	225514595	225514900	225519197	225519565	139122	15,8	133154	3,4	0.0169497	0.822,0.884	0.957,0.951	-0.101
ENSG00000154380.17	ENAH	chr1	-	225517195	225517990	225514595	225514900	225519197	225519565	97,58	15,8	74,89	3,4	0.0252462	0.764,0.784	0.925,0.918	-0.147
ENSG00000138792.9	ENPEP	chr4	+	110506636	110506757	110491032	110491164	110509652	110509807	19,23	5,0	17,27	0,0	0.0377589	0.655,1.0	1.0,1.0	-0.172
ENSG00000197586.12	ENTPD6	chr20	+	25196178	25196254	25195756	25195867	25206521	25206590	0,0	10,12	3,7	22,10	0.00538793	0.0,0.0	0.064,0.259	-0.162
ENSG00000159023.18	EPB41	chr1	+	29060421	29060484	29058588	29058645	29064981	29065158	36,22	33,34	46,42	15,10	0.000297181	0.366,0.255	0.619,0.69	-0.344
ENSG00000088367.20	EPB41L1	chr20	+	36214356	36214440	36212271	36212376	36218875	36218962	22,5	25,24	47,31	18,11	0.000797711	0.306,0.094	0.566,0.585	-0.375
ENSG00000088367.20	EPB41L1	chr20	+	36214359	36214440	36212271	36212376	36218875	36218962	24,7	25,24	51,32	18,11	0.00108963	0.324,0.127	0.586,0.593	-0.364
ENSG00000088367.20	EPB41L1	chr20	+	36121659	36121816	36112425	36112480	36175550	36175715	0,1	12,2	8,4	5,5	0.00176447	0.0,0.2	0.444,0.286	-0.265
ENSG00000115109.13	EPB41L5	chr2	+	120146224	120146289	120131617	120131715	120160880	120160974	54,95	0,1	38,31	0,6	0.0327305	1.0,0.98	1.0,0.73	0.125
ENSG00000152223.12	EPG5	chr18	-	45917678	45917819	45916437	45916582	45922340	45922600	20,20	0,0	40,28	9,2	0.00124212	1.0,1.0	0.69,0.875	0.218
ENSG00000142627.12	EPHA2	chr1	-	16150895	16150963	16148377	16149047	16155847	16156087	31,23	1,5	28,35	1,0	0.0333056	0.941,0.702	0.935,1.0	-0.146
ENSG00000112425.13	EPM2A	chr6	-	145635244	145635486	145627489	145627693	145686121	145686296	2,15	0,0	15,12	0,7	0.0154498	1.0,1.0	1.0,0.462	0.269
ENSG00000164307.12	ERAP1	chr5	-	96788530	96788685	96786469	96786549	96790295	96790367	32,12	6,0	49,55	0,0	0.00874866	0.727,1.0	1.0,1.0	-0.137
ENSG00000141736.13	ERBB2	chr17	+	39719786	39719834	39717319	39717480	39723318	39723457	37,11	16,6	52,45	4,4	0.00139486	0.58,0.523	0.886,0.871	-0.327
ENSG00000112851.14	ERBB2IP	chr5	+	66075023	66075230	66053405	66054951	66076315	66076408	176203	7,7	245264	34,31	0.000466092	0.926,0.935	0.783,0.81	0.134
ENSG00000112851.14	ERBB2IP	chr5	+	66075101	66075230	66053405	66054951	66076315	66076597	80110	7,7	167118	34,31	0.00262931	0.851,0.887	0.711,0.656	0.185
ENSG00000082805.19	ERC1	chr12	+	1371832	1371977	1289851	1290012	1408148	1408247	25,8	2,3	21,51	0,0	0.01162	0.862,0.571	1.0,1.0	-0.284
ENSG00000104884.14	ERCC2	chr19	-	45364423	45364547	45364234	45364331	45368629	45368743	33,21	7,0	48,43	0,0	0.00581539	0.702,1.0	1.0,1.0	-0.149
ENSG00000182150.15	ERCC6L2	chr9	+	95967458	95967625	95966561	95966714	95970575	95970656	44,48	48101	10,14	63,61	0.000966531	0.314,0.192	0.074,0.103	0.165
ENSG00000107566.13	ERLIN1	chr10	-	100179200	100179247	100175944	100176070	100183755	100183837	7,6	0,0	17,17	0,5	0.0385316	1.0,1.0	1.0,0.672	0.164
ENSG00000147475.14	ERLIN2	chr8	+	37741771	37741818	37740274	37740446	37744354	37744416	28,23	7,4	134126	2,6	0.00498933	0.707,0.776	0.976,0.927	-0.21
ENSG00000164010.13	ERMAP	chr1	+	42824547	42824752	42817130	42817253	42825622	42825790	0,0	8,5	0,7	10,5	0.0299487	0.0,0.0	0.0,0.412	-0.206
ENSG00000130023.15	ERMARD	chr6	+	169773318	169773402	169769539	169769713	169775939	169776065	1,8	0,0	19,23	5,1	0.00749936	1.0,1.0	0.655,0.92	0.212
ENSG00000197930.12	ERO1A	chr14	-	52683797	52683902	52682324	52682408	52695367	52695529	5,3	5,8	0,0	1,2	0.00574506	0.333,0.158	0.0,0.0	0.245
ENSG00000089248.6	ERP29	chr12	+	112019755	112019894	112013315	112013609	112022149	112023168	429300	79,98	581697	44,67	2.56977e-05	0.731,0.605	0.868,0.839	-0.185
ENSG00000089248.6	ERP29	chr12	+	112019755	112019881	112013315	112013609	112022149	112023451	185122	79,98	237282	44,67	0.000671961	0.539,0.384	0.729,0.678	-0.242
ENSG00000141446.10	ESCO1	chr18	-	21539919	21540009	21536041	21536185	21560858	21560990	122110	0,4	84,87	11,8	0.00138266	1.0,0.932	0.792,0.845	0.147
ENSG00000141446.10	ESCO1	chr18	-	21539919	21540021	21536041	21536185	21560858	21560981	88,76	0,4	62,58	11,8	0.00168093	1.0,0.905	0.738,0.784	0.192
ENSG00000139641.12	ESYT1	chr12	+	56142284	56142425	56138926	56139013	56142577	56142732	173228	32,24	373256	5,14	8.06366e-06	0.73,0.826	0.974,0.901	-0.159
ENSG00000117868.15	ESYT2	chr7	-	158789916	158790145	158788344	158788417	158791179	158791374	1,5	7,5	2,1	0,0	2.52202e-06	0.067,0.333	1.0,1.0	-0.8
ENSG00000117868.15	ESYT2	chr7	-	158752780	158752843	158749648	158749723	158759485	158759581	765713	69239	620609	44,45	0.0403811	0.855,0.613	0.882,0.878	-0.146
ENSG00000067208.14	EVI5	chr1	-	92773905	92774027	92736559	92736627	92784835	92784966	0,0	7,3	4,4	7,0	0.00155533	0.0,0.0	0.222,1.0	-0.611
ENSG00000196405.12	EVL	chr14	+	100139333	100139369	100138811	100138897	100141179	100141246	3,1	16,8	8,14	7,3	0.00153269	0.111,0.077	0.432,0.757	-0.501
ENSG00000164002.11	EXO5	chr1	+	40509732	40509790	40508797	40508908	40514514	40516556	22,7	0,0	33,21	2,4	0.0102527	1.0,1.0	0.901,0.743	0.178
ENSG00000090989.17	EXOC1	chr4	+	55888887	55888932	55883822	55883928	55890222	55890386	45,70	22,30	151,99	9,25	0.00707894	0.557,0.589	0.912,0.709	-0.238
ENSG00000138190.16	EXOC6	chr10	+	92919981	92920050	92915757	92915913	92928338	92928422	61,43	8,16	65,79	0,1	1.9072e-06	0.795,0.577	1.0,0.976	-0.302
ENSG00000138190.16	EXOC6	chr10	+	92999249	92999387	92997473	92997615	93014193	93014267	3,4	11,12	0,2	31,28	0.0258898	0.12,0.143	0.0,0.034	0.115
ENSG00000182473.21	EXOC7	chr17	-	76090328	76090397	76089174	76089320	76094413	76094581	29,14	76,66	185114	31,36	0	0.162,0.097	0.752,0.616	-0.554
ENSG00000182473.21	EXOC7	chr17	-	76091142	76091235	76089174	76089320	76094413	76094581	0,5	76,66	51,49	31,36	0	0.0,0.036	0.451,0.405	-0.41
ENSG00000182473.21	EXOC7	chr17	-	76090328	76090481	76089174	76089320	76094413	76094581	10,5	76,66	127,74	31,36	0	0.062,0.036	0.672,0.507	-0.54
ENSG00000182473.21	EXOC7	chr17	-	76091142	76091272	76089174	76089320	76094413	76094581	0,1	76,66	6,21	31,36	4.06044e-08	0.0,0.008	0.088,0.226	-0.153
ENSG00000182473.21	EXOC7	chr17	-	76091142	76091235	76090328	76090397	76094413	76094581	0,4	19,9	57,35	62,40	0.00164076	0.0,0.182	0.315,0.304	-0.218
ENSG00000120699.12	EXOSC8	chr13	+	37002272	37002309	37001748	37001801	37002487	37002551	13,9	5,0	11,14	0,0	0.027837	0.632,1.0	1.0,1.0	-0.184
ENSG00000108799.12	EZH1	chr17	-	42724304	42724424	42722794	42722915	42727634	42727763	82123	13,46	92102	11,5	0.0205801	0.759,0.572	0.807,0.911	-0.194
ENSG00000165591.6	FAAH2	chrX	+	57331597	57331807	57310592	57310729	57341270	57341390	15,23	0,0	16,12	3,4	0.000562591	1.0,1.0	0.727,0.6	0.337
ENSG00000162585.16	FAAP20	chr1	-	2192646	2192975	2189579	2189781	2193638	2193910	4,3	16,29	10,14	16,26	0.0315493	0.111,0.049	0.238,0.212	-0.145
ENSG00000162585.16	FAAP20	chr1	-	2186837	2186911	2184477	2185513	2193638	2193910	5,1	15,5	0,0	7,2	0.0471053	0.143,0.091	0.0,0.0	0.117
ENSG00000133193.12	FAM104A	chr17	-	73227164	73227264	73209487	73209768	73232085	73232371	106139	10,15	167120	7,1	0.0103032	0.841,0.822	0.923,0.984	-0.122
ENSG00000133193.12	FAM104A	chr17	-	73227164	73227182	73209604	73209768	73232085	73232320	17,25	10,15	29,21	7,1	0.0334927	0.578,0.573	0.769,0.944	-0.281
ENSG00000166801.15	FAM111A	chr11	+	59143609	59143695	59143082	59143304	59145826	59145856	13,8	0,0	9,1	13,3	1.0669e-07	1.0,1.0	0.257,0.143	0.8
ENSG00000166801.15	FAM111A	chr11	+	59143496	59143695	59143082	59143304	59145826	59145856	35,30	0,0	15,21	13,3	3.16083e-05	1.0,1.0	0.366,0.778	0.428
ENSG00000166801.15	FAM111A	chr11	+	59144167	59144310	59143654	59143695	59145826	59145856	0,0	13,8	4,1	6,1	0.0124328	0.0,0.0	0.25,0.333	-0.291
ENSG00000166801.15	FAM111A	chr11	+	59144808	59144900	59143654	59143695	59145826	59145856	0,1	13,8	6,0	6,1	0.0334927	0.0,0.059	0.333,0.0	-0.137
ENSG00000166801.15	FAM111A	chr11	+	59144808	59144896	59143654	59143695	59145826	59145856	1,7	13,8	11,7	6,1	0.0366975	0.037,0.304	0.478,0.778	-0.458
ENSG00000156504.16	FAM122B	chrX	-	134789579	134789636	134789222	134789266	134793814	134793893	13,10	32,49	24,25	33,35	0.0343118	0.184,0.102	0.288,0.284	-0.143
ENSG00000031003.10	FAM13B	chr5	-	137956476	137956542	137954165	137954376	137959615	137959763	1,1	9,11	19,11	13,4	4.37376e-05	0.054,0.045	0.431,0.588	-0.46
ENSG00000164142.15	FAM160A1	chr4	+	151454700	151454808	151409245	151409465	151482523	151482648	16,24	3,5	12,10	0,1	0.0239749	0.727,0.706	1.0,0.833	-0.2
ENSG00000054965.10	FAM168A	chr11	-	73409486	73409661	73407512	73407643	73419873	73419999	100,96	10,15	79,56	1,3	0.011809	0.833,0.762	0.975,0.903	-0.142
ENSG00000150756.13	FAM173B	chr5	-	10235210	10235261	10227579	10227647	10236477	10236615	9,2	24,9	83,82	16,19	2.96642e-10	0.179,0.115	0.752,0.716	-0.587
ENSG00000150756.13	FAM173B	chr5	-	10235210	10235261	10227579	10227663	10236477	10236615	6,2	3,1	48,16	0,0	0.0034066	0.538,0.538	1.0,1.0	-0.462
ENSG00000198718.12	FAM179B	chr14	+	45027298	45027479	45025782	45025872	45028175	45028296	51,55	0,0	51,37	3,9	0.00026455	1.0,1.0	0.895,0.673	0.216
ENSG00000198718.12	FAM179B	chr14	+	45027298	45027474	45025782	45025872	45028175	45028296	116138	0,0	83,91	3,9	0.000336311	1.0,1.0	0.933,0.835	0.116
ENSG00000198718.12	FAM179B	chr14	+	45071711	45071798	45068423	45068643	45073295	45074431	73,51	0,0	56,56	8,1	0.00346112	1.0,1.0	0.778,0.966	0.128
ENSG00000198718.12	FAM179B	chr14	+	45046544	45046703	45044634	45044870	45052435	45052562	48,35	0,0	50,29	0,8	0.00939364	1.0,1.0	1.0,0.644	0.178
ENSG00000198718.12	FAM179B	chr14	+	45046544	45046702	45044634	45044870	45052435	45052562	24,18	0,0	30,13	0,8	0.0165952	1.0,1.0	1.0,0.448	0.276
ENSG00000186973.10	FAM183A	chr1	+	43152827	43152979	43150760	43150820	43156205	43156279	16,5	2,5	24,11	0,0	0.000498795	0.8,0.333	1.0,1.0	-0.433
ENSG00000186973.10	FAM183A	chr1	+	43152827	43152931	43150760	43150820	43156205	43156396	20,8	2,5	22,13	0,0	0.000915871	0.833,0.444	1.0,1.0	-0.362
ENSG00000172775.16	FAM192A	chr16	-	57174619	57174688	57173727	57173869	57185820	57186022	8,6	1,15	1,6	51,43	0.0129864	0.802,0.169	0.01,0.066	0.448
ENSG00000172775.16	FAM192A	chr16	-	57175538	57175590	57173727	57173869	57185820	57186032	1,6	1,15	1,2	51,43	0.0137869	0.366,0.188	0.011,0.026	0.259
ENSG00000172775.16	FAM192A	chr16	-	57175538	57175700	57173772	57173869	57185820	57186039	1,7	1,15	3,2	51,43	0.0242142	0.333,0.189	0.029,0.023	0.235
ENSG00000125386.14	FAM193A	chr4	+	2689505	2689550	2672120	2672372	2690697	2690970	23,23	1,0	19,17	6,0	0.0460574	0.934,1.0	0.66,1.0	0.137
ENSG00000108021.19	FAM208B	chr10	+	5717658	5717750	5714134	5714207	5720543	5720611	48,36	47,27	127112	30,34	2.9092e-05	0.338,0.4	0.679,0.622	-0.282
ENSG00000108021.19	FAM208B	chr10	+	5709529	5709663	5684941	5685175	5712822	5712918	39,18	5,9	27,22	23,41	0.0185598	0.796,0.5	0.37,0.212	0.357
ENSG00000108021.19	FAM208B	chr10	+	5717658	5717750	5714134	5714207	5720259	5720397	28,32	5,10	93,82	9,2	0.0335552	0.737,0.615	0.838,0.953	-0.22
ENSG00000099290.15	FAM21A	chr10	+	50092161	50092233	50091430	50091518	50093267	50093386	23,16	8,5	37,21	0,2	0.0015882	0.59,0.615	1.0,0.84	-0.317
ENSG00000172661.17	FAM21C	chr10	+	45751481	45751553	45750750	45750838	45752587	45752706	24,15	6,8	15,22	1,1	0.0153422	0.667,0.484	0.882,0.917	-0.324
ENSG00000071889.16	FAM3A	chrX	-	154507810	154507861	154507405	154507490	154508288	154508347	140141	30,24	130144	4,7	3.0683e-05	0.731,0.774	0.95,0.923	-0.184
ENSG00000071889.16	FAM3A	chrX	-	154507810	154507885	154507405	154507490	154508288	154508347	26,33	30,24	30,44	4,7	3.24891e-05	0.302,0.407	0.789,0.759	-0.42
ENSG00000071889.16	FAM3A	chrX	-	154507810	154507882	154507405	154507490	154508288	154508347	39,39	30,24	35,46	4,7	0.000105158	0.394,0.448	0.814,0.767	-0.369
ENSG00000153310.18	FAM49B	chr8	-	129912359	129912417	129904498	129904585	129970942	129970995	4,10	6,13	1,1	19,10	0.00177024	0.269,0.298	0.028,0.052	0.243
ENSG00000153310.18	FAM49B	chr8	-	129904498	129904585	129903311	129903350	129939607	129939754	114109	40,57	135128	107,98	0.0403953	0.588,0.489	0.387,0.395	0.147
ENSG00000139146.13	FAM60A	chr12	-	31304981	31305123	31298076	31298224	31326023	31326128	8,1	35,46	8,12	30,19	0.0374903	0.103,0.011	0.118,0.24	-0.122
ENSG00000143409.15	FAM63A	chr1	-	151002164	151002170	151001724	151001782	151006311	151006871	6,15	0,0	7,9	6,3	0.000197615	1.0,1.0	0.521,0.737	0.371
ENSG00000143409.15	FAM63A	chr1	-	151002164	151002400	151001724	151001782	151006311	151006485	26,39	0,0	41,52	6,3	0.00326022	1.0,1.0	0.774,0.897	0.164
ENSG00000143409.15	FAM63A	chr1	-	151002164	151002968	151001724	151001782	151006311	151006797	37,41	0,0	47,58	6,3	0.00362626	1.0,1.0	0.797,0.906	0.148
ENSG00000143409.15	FAM63A	chr1	-	151002164	151002323	151001724	151001782	151006311	151006857	30,44	0,0	45,62	6,3	0.00424538	1.0,1.0	0.789,0.912	0.149
ENSG00000009780.15	FAM76A	chr1	+	27749067	27749154	27744653	27744811	27755194	27755330	7,10	4,10	59,57	12,12	0.0321587	0.467,0.333	0.711,0.704	-0.307
ENSG00000166797.10	FAM96A	chr15	-	64081101	64081151	64075352	64075537	64088686	64088851	107,65	36,44	176129	33,24	0.0154369	0.636,0.465	0.758,0.76	-0.209
ENSG00000130244.12	FAM98C	chr19	+	38405374	38405421	38404922	38405113	38405518	38409083	39,62	0,1	46,44	5,4	0.00914141	1.0,0.974	0.847,0.869	0.129
ENSG00000181544.13	FANCB	chrX	-	14868922	14869043	14864559	14865580	14872985	14873062	1,1	0,0	3,17	1,3	0.0359881	1.0,1.0	0.6,0.739	0.331
ENSG00000158169.11	FANCC	chr9	-	95149922	95150087	95135345	95135502	95171078	95171143	40,13	1,0	67,78	2,12	0.02002	0.952,1.0	0.944,0.765	0.121
ENSG00000221829.9	FANCG	chr9	-	35075961	35076028	35075464	35075754	35076431	35076583	24,37	3,2	83,65	0,0	0.0377368	0.805,0.905	1.0,1.0	-0.145
ENSG00000115392.11	FANCL	chr2	-	58226727	58226782	58221941	58222042	58229813	58229874	105,93	18,12	94109	30,36	0.0305185	0.767,0.814	0.639,0.631	0.155
ENSG00000187790.10	FANCM	chr14	+	45140631	45140709	45137068	45137241	45148836	45148995	15,0	18,9	50,31	4,10	0.000412532	0.294,0.0	0.862,0.608	-0.588
ENSG00000116120.9	FARSB	chr2	-	222613266	222613380	222599927	222600083	222613810	222613928	2,14	41,24	3,4	133126	0.0008487	0.024,0.226	0.011,0.016	0.112
ENSG00000164896.19	FASTK	chr7	-	151078561	151078701	151077878	151078092	151079499	151079922	56,42	5,3	99115	2,0	0.0117605	0.848,0.875	0.961,1.0	-0.119
ENSG00000156860.15	FBRS	chr16	+	30661179	30661215	30660265	30660442	30662419	30662468	8,11	9,14	13,13	2,1	0.000537986	0.372,0.344	0.813,0.897	-0.497
ENSG00000156860.15	FBRS	chr16	+	30661303	30661333	30660262	30660442	30662419	30662468	17,22	9,14	17,17	2,1	0.00387146	0.572,0.526	0.857,0.923	-0.341
ENSG00000112787.12	FBRSL1	chr12	+	132581740	132581824	132581438	132581516	132582061	132582266	32,18	5,2	49,48	0,0	0.0016863	0.762,0.818	1.0,1.0	-0.21
ENSG00000127585.11	FBXL16	chr16	-	694991	695076	694633	694697	695414	695923	22,22	5,0	35,62	0,0	0.0388674	0.688,1.0	1.0,1.0	-0.156
ENSG00000099364.16	FBXL19	chr16	+	30928466	30928630	30927744	30927963	30930072	30930584	35,22	5,2	54,30	1,0	0.0117841	0.778,0.846	0.964,1.0	-0.17
ENSG00000099364.16	FBXL19	chr16	+	30928466	30928628	30927744	30927963	30930072	30930584	43,33	5,2	66,40	1,0	0.0177023	0.811,0.892	0.971,1.0	-0.134
ENSG00000108306.11	FBXL20	chr17	-	39285477	39285573	39282728	39282855	39297126	39297195	23,24	14,17	37,52	2,0	2.94248e-09	0.451,0.414	0.902,1.0	-0.519
ENSG00000167196.13	FBXO22	chr15	+	75904490	75904629	75903877	75904103	75913202	75913290	110153	0,0	173213	27,2	0.000117717	1.0,1.0	0.762,0.982	0.128
ENSG00000156804.7	FBXO32	chr8	-	123513197	123513382	123506391	123506574	123531897	123531990	20,25	7,2	8,6	0,0	0.00194312	0.588,0.862	1.0,1.0	-0.275
ENSG00000072803.17	FBXW11	chr5	-	171996889	171997051	171910571	171910797	172006457	172006659	35,24	83,91	52,60	45,55	8.68724e-06	0.174,0.117	0.366,0.353	-0.214
ENSG00000072803.17	FBXW11	chr5	-	171914342	171914405	171910571	171910797	172006457	172006873	53,48	83,91	71,63	45,55	0.00233897	0.253,0.219	0.456,0.378	-0.181
ENSG00000137478.14	FCHSD2	chr11	-	73015808	73015885	73000989	73001134	73083694	73083740	32,46	2,4	38,56	0,0	0.019775	0.889,0.852	1.0,1.0	-0.129
ENSG00000160752.14	FDPS	chr1	+	155319748	155319928	155319610	155319688	155320408	155320637	438372	25,7	666440	78,50	2.89387e-05	0.898,0.964	0.81,0.815	0.119
ENSG00000160752.14	FDPS	chr1	+	155319856	155319928	155319614	155319688	155320408	155320665	463383	25,7	693470	78,50	2.9414e-05	0.903,0.965	0.816,0.825	0.113
ENSG00000160752.14	FDPS	chr1	+	155319825	155319928	155319610	155319688	155320408	155320647	436372	25,7	667440	78,50	3.12608e-05	0.897,0.964	0.81,0.815	0.118
ENSG00000160752.14	FDPS	chr1	+	155319793	155319945	155319614	155319688	155320408	155320647	243244	25,7	382292	78,50	0.00038845	0.829,0.946	0.71,0.745	0.16
ENSG00000160752.14	FDPS	chr1	+	155318664	155318855	155318174	155318291	155319610	155319688	91,94	10,2	201113	2,0	0.00254505	0.82,0.959	0.98,1.0	-0.101
ENSG00000160752.14	FDPS	chr1	+	155319856	155319945	155319614	155319688	155320408	155320647	27,11	25,7	28,30	78,50	0.0377396	0.351,0.44	0.152,0.231	0.204
ENSG00000151422.12	FER	chr5	+	108954728	108954867	108946129	108946222	108959224	108959347	23,15	0,2	5,2	4,1	0.0108861	1.0,0.789	0.385,0.5	0.452
ENSG00000151422.12	FER	chr5	+	108954728	108954842	108946129	108946222	108959224	108959347	21,14	0,2	6,2	4,1	0.0172191	1.0,0.778	0.429,0.5	0.424
ENSG00000088340.15	FER1L4	chr20	-	35578835	35578967	35576785	35576828	35579055	35579114	71,55	17,9	18,17	2,0	0.0417842	0.676,0.753	0.818,1.0	-0.195
ENSG00000171055.14	FEZ2	chr2	-	36558437	36558513	36555682	36555748	36578596	36578865	72,98	2,0	81,87	15,22	5.62477e-08	0.947,1.0	0.73,0.664	0.276
ENSG00000111790.13	FGFR1OP2	chr12	+	26960514	26960628	26957600	26957743	26963341	26963455	7,5	49,51	43,23	82,73	0.00163094	0.067,0.047	0.208,0.136	-0.115
ENSG00000172456.17	FGGY	chr1	+	59674038	59674133	59667282	59667403	59757930	59757992	30,27	3,7	48,13	0,0	0.000408068	0.833,0.659	1.0,1.0	-0.254
ENSG00000172500.12	FIBP	chr11	-	65886321	65886395	65885529	65885663	65887599	65887726	55,64	12,7	296284	5,10	0.000345034	0.696,0.821	0.967,0.934	-0.192
ENSG00000172500.12	FIBP	chr11	-	65886321	65886421	65885508	65885663	65887599	65887726	56,64	12,7	296283	5,10	0.000358924	0.7,0.821	0.967,0.934	-0.19
ENSG00000172500.12	FIBP	chr11	-	65886321	65886422	65885529	65885663	65887599	65887726	128119	12,7	525536	5,10	0.000499564	0.842,0.895	0.981,0.964	-0.104
ENSG00000145216.15	FIP1L1	chr4	+	53391429	53391498	53391008	53391139	53399729	53399839	76,76	46,42	74,98	81131	0.0033501	0.456,0.479	0.317,0.275	0.171
ENSG00000106692.13	FKTN	chr9	+	105623049	105623221	105619933	105620061	105635050	105636238	5,9	7,8	6,0	13,19	0.0491382	0.263,0.36	0.187,0.0	0.218
ENSG00000196924.14	FLNA	chrX	-	154357250	154357274	154354824	154355072	154357433	154357623	8411186	486743	848851	235318	1.25634e-05	0.566,0.546	0.731,0.668	-0.143
ENSG00000137312.14	FLOT1	chr6	-	30741189	30741333	30740678	30740798	30741613	30741704	343484	32,26	638674	12,3	1.43048e-08	0.843,0.903	0.964,0.991	-0.105
ENSG00000137312.14	FLOT1	chr6	-	30741189	30741333	30740678	30740798	30742146	30742307	247382	38,26	435516	13,24	0.00291067	0.765,0.88	0.944,0.915	-0.107
ENSG00000137312.14	FLOT1	chr6	-	30741189	30741372	30740678	30740798	30742146	30742276	229369	38,26	426487	13,24	0.00328489	0.751,0.876	0.942,0.91	-0.112
ENSG00000137312.14	FLOT1	chr6	-	30741189	30741704	30740678	30740798	30742146	30742225	229373	38,26	426486	13,24	0.00368295	0.751,0.878	0.942,0.91	-0.111
ENSG00000132589.15	FLOT2	chr17	-	28884224	28884315	28883107	28883231	28888944	28889026	70,74	6,11	230202	3,5	0.000874744	0.854,0.771	0.975,0.953	-0.151
ENSG00000132589.15	FLOT2	chr17	-	28885856	28885947	28883176	28883231	28888944	28889026	6,9	6,11	17,22	3,5	0.00893305	0.333,0.29	0.739,0.688	-0.402
ENSG00000125848.9	FLRT3	chr20	-	14328063	14328200	14323994	14327558	14337403	14337614	1,2	27,23	10,6	17,22	0.00569415	0.018,0.042	0.227,0.12	-0.143
ENSG00000162769.12	FLVCR1	chr1	+	212887890	212888001	212885292	212885396	212888488	212888594	8,3	3,3	12,10	0,0	9.16648e-05	0.571,0.333	1.0,1.0	-0.548
ENSG00000119686.9	FLVCR2	chr14	+	75634909	75635013	75624611	75624752	75639351	75639462	14,12	0,0	20,25	0,5	0.0407282	1.0,1.0	1.0,0.714	0.143
ENSG00000059122.16	FLYWCH1	chr16	+	2928823	2928917	2914175	2914289	2929612	2929916	0,0	3,7	2,7	23,2	0.013878	0.0,0.0	0.042,0.636	-0.339
ENSG00000115414.18	FN1	chr2	-	215380810	215381080	215379129	215379317	215382211	215382325	21,4	14,7	22,13	5,2	0.038756	0.429,0.222	0.688,0.765	-0.401
ENSG00000217128.11	FNIP1	chr5	-	131730903	131731038	131719316	131719417	131744563	131744690	98138	7,19	66,96	0,5	0.0274482	0.875,0.784	1.0,0.906	-0.124
ENSG00000052795.12	FNIP2	chr4	+	158833800	158833890	158833527	158833628	158835404	158835476	5,3	7,4	11,21	2,3	0.00443984	0.263,0.273	0.733,0.778	-0.488
ENSG00000164916.10	FOXK1	chr7	+	4740839	4741023	4682308	4682868	4754458	4754615	53,87	0,2	38,46	7,3	0.00731102	1.0,0.956	0.731,0.885	0.17
ENSG00000111206.12	FOXM1	chr12	-	2865354	2865399	2864682	2864752	2866392	2866521	70,49	65,28	172115	49,18	0.000317059	0.398,0.518	0.683,0.797	-0.282
ENSG00000111206.12	FOXM1	chr12	-	2865349	2865399	2864682	2864752	2866392	2866521	35,6	65,28	68,46	49,18	0.000380207	0.241,0.112	0.449,0.601	-0.349
ENSG00000114861.18	FOXP1	chr3	-	71581548	71581759	71493425	71493555	71583570	71583753	12,22	4,1	12,24	0,0	0.0151132	0.6,0.917	1.0,1.0	-0.242
ENSG00000075539.13	FRYL	chr4	-	48598828	48598873	48595896	48596000	48602019	48602121	54,33	37,38	65105	18,11	9.16648e-05	0.473,0.348	0.689,0.854	-0.361
ENSG00000075539.13	FRYL	chr4	-	48609743	48609823	48606437	48606606	48619273	48619370	27,17	3,2	30,33	0,0	0.0187892	0.818,0.81	1.0,1.0	-0.186
ENSG00000122687.17	FTSJ2	chr7	-	2238014	2238937	2234294	2235564	2239417	2239707	13,4	22,16	49,39	44,25	0.0240428	0.228,0.111	0.358,0.438	-0.229
ENSG00000010361.13	FUZ	chr19	-	49812614	49812736	49812250	49812335	49812995	49813241	5,1	6,4	30,28	5,4	0.00168347	0.294,0.111	0.75,0.778	-0.561
ENSG00000010361.13	FUZ	chr19	-	49812446	49812736	49812250	49812335	49812995	49813299	5,1	6,4	19,14	5,4	0.0233895	0.294,0.111	0.655,0.636	-0.443
ENSG00000010361.13	FUZ	chr19	-	49812637	49812736	49812250	49812335	49812995	49813175	5,1	6,4	18,14	5,4	0.026468	0.294,0.111	0.643,0.636	-0.437
ENSG00000114416.17	FXR1	chr3	+	180975312	180975404	180970157	180970358	180976121	180976579	107105	200224	180141	167139	9.64559e-05	0.211,0.19	0.35,0.337	-0.143
ENSG00000114416.17	FXR1	chr3	+	180914651	180914995	180912481	180912736	180933333	180933390	2,1	24,39	6,5	12,16	0.0068498	0.04,0.013	0.2,0.135	-0.141
ENSG00000163820.14	FYCO1	chr3	-	45985151	45985235	45984855	45985022	45995721	45995815	1,1	7,3	7,3	3,1	0.00692223	0.067,0.143	0.538,0.6	-0.464
ENSG00000104064.16	GABPB1	chr15	-	50346371	50346395	50309690	50309798	50354984	50355202	0,0	12,24	10,9	49,28	0.000459186	0.0,0.0	0.133,0.195	-0.164
ENSG00000117308.14	GALE	chr1	-	23796508	23796586	23796150	23796265	23796696	23796782	54,43	0,2	112,75	10,11	0.00693435	1.0,0.915	0.848,0.773	0.147
ENSG00000156958.14	GALK2	chr15	+	49308607	49308777	49292326	49292537	49318110	49318192	7,15	0,0	7,22	0,5	0.0225129	1.0,1.0	1.0,0.688	0.156
ENSG00000141012.12	GALNS	chr16	-	88842705	88842829	88841896	88841971	88856757	88856966	58,38	14,11	93,42	8,2	0.0131485	0.674,0.633	0.853,0.913	-0.23
ENSG00000141012.12	GALNS	chr16	-	88842672	88842829	88841896	88841971	88856757	88856966	12,4	14,11	19,8	8,2	0.0382355	0.3,0.154	0.543,0.667	-0.378
ENSG00000178234.12	GALNT11	chr7	+	152027596	152027718	152025713	152025884	152094189	152094522	1,1	14,17	15,17	33,28	0.000860299	0.034,0.029	0.185,0.233	-0.178
ENSG00000178234.12	GALNT11	chr7	+	152027669	152027718	152025797	152025884	152094189	152094522	1,1	14,17	7,15	33,28	0.0120773	0.041,0.034	0.112,0.241	-0.139
ENSG00000214013.9	GANC	chr15	+	42280916	42281133	42278481	42278590	42283610	42284389	18,9	0,0	14,7	1,3	0.0423317	1.0,1.0	0.875,0.538	0.293
ENSG00000165219.21	GAPVD1	chr9	+	125263550	125263700	125261830	125261959	125287761	125287883	3,7	2,5	7,13	0,1	0.0012826	0.429,0.412	1.0,0.867	-0.513
ENSG00000165219.21	GAPVD1	chr9	+	125342218	125342299	125341176	125341264	125346818	125346941	277292	57,41	351272	23,30	0.0123998	0.708,0.781	0.884,0.819	-0.107
ENSG00000141013.14	GAS8	chr16	+	90035775	90035879	90035632	90035687	90036380	90036766	54,74	92,88	9,24	65,93	1.41448e-05	0.227,0.296	0.065,0.114	0.172
ENSG00000141013.14	GAS8	chr16	+	90027635	90027722	90020043	90020156	90031189	90031496	6,16	3,4	4,5	0,0	0.000455477	0.5,0.667	1.0,1.0	-0.416
ENSG00000141013.14	GAS8	chr16	+	90020043	90020156	90019636	90019768	90031189	90031406	11,19	0,10	2,5	0,0	0.00848961	1.0,0.487	1.0,1.0	-0.256
ENSG00000141013.14	GAS8	chr16	+	90027635	90027722	90019642	90019768	90031189	90031496	23,29	0,10	4,14	0,0	0.00957199	1.0,0.592	1.0,1.0	-0.204
ENSG00000167491.17	GATAD2A	chr19	+	19501968	19502043	19501120	19501416	19502330	19502526	90,81	4,16	134145	0,0	2.60963e-06	0.918,0.717	1.0,1.0	-0.182
ENSG00000167491.17	GATAD2A	chr19	+	19436130	19436301	19385825	19386138	19465339	19465614	1,0	24,12	5,9	29,12	0.00277108	0.02,0.0	0.079,0.273	-0.166
ENSG00000167491.17	GATAD2A	chr19	+	19436130	19436219	19385825	19386138	19465339	19465577	6,3	24,12	25,18	29,12	0.00762066	0.111,0.111	0.301,0.429	-0.254
ENSG00000167491.17	GATAD2A	chr19	+	19436130	19436219	19385825	19386138	19465344	19465614	2,10	19,15	18,17	10,15	0.0280631	0.05,0.25	0.474,0.362	-0.268
ENSG00000239282.7	GATSL3	chr22	-	30288705	30288776	30287372	30287560	30289384	30289505	31,6	6,3	42,41	0,0	8.55036e-05	0.721,0.5	1.0,1.0	-0.389
ENSG00000107862.4	GBF1	chr10	+	102363255	102363396	102362474	102362664	102363709	102363798	75,61	2,9	147130	0,2	0.00235731	0.949,0.772	1.0,0.97	-0.124
ENSG00000187210.12	GCNT1	chr9	+	76501767	76501931	76500915	76501061	76502238	76502416	0,1	9,9	4,4	6,6	0.00747514	0.0,0.053	0.25,0.25	-0.224
ENSG00000187210.12	GCNT1	chr9	+	76501752	76501931	76500915	76501061	76502238	76502416	1,3	9,9	5,10	6,6	0.0374854	0.053,0.143	0.294,0.455	-0.277
ENSG00000140905.9	GCSH	chr16	-	81090600	81090680	81087600	81087664	81096130	81096299	30,30	0,0	35,37	2,4	0.0231978	1.0,1.0	0.897,0.822	0.141
ENSG00000092208.16	GEMIN2	chr14	+	39124991	39125036	39122429	39122543	39128279	39128348	26,32	0,2	76,64	8,9	0.0469667	1.0,0.908	0.854,0.814	0.12
ENSG00000164347.17	GFM2	chr5	-	74730259	74730398	74725940	74726126	74733021	74733098	80,75	14,14	221174	7,13	0.00263519	0.741,0.728	0.94,0.87	-0.171
ENSG00000204120.14	GIGYF2	chr2	+	232734416	232734486	232703423	232703489	232735154	232735238	8,10	49,45	24,32	43,39	0.00117714	0.076,0.101	0.219,0.292	-0.167
ENSG00000123159.15	GIPC1	chr19	-	14480304	14480476	14479411	14479524	14480592	14480778	153127	18,5	225238	0,0	2.0932e-07	0.81,0.927	1.0,1.0	-0.131
ENSG00000170266.15	GLB1	chr3	-	33077093	33077237	33072543	33072713	33097010	33097202	1,1	63,53	21,4	43,42	2.94153e-05	0.008,0.009	0.196,0.045	-0.112
ENSG00000119392.14	GLE1	chr9	+	128507215	128507340	128504730	128504904	128508875	128509097	10,2	62,59	69,46	98,59	1.63211e-09	0.075,0.017	0.26,0.28	-0.224
ENSG00000174842.16	GLMN	chr1	-	92286489	92286592	92271464	92271652	92288913	92289151	5,7	0,0	20,16	3,2	0.0258284	1.0,1.0	0.769,0.8	0.216
ENSG00000198715.11	GLMP	chr1	-	156293319	156293576	156292687	156293209	156294017	156294236	27,34	13,1	63,62	2,0	0.0113526	0.509,0.944	0.94,1.0	-0.244
ENSG00000198715.11	GLMP	chr1	-	156293319	156293429	156292694	156293209	156294017	156294076	11,11	13,1	36,28	2,0	0.0127934	0.297,0.846	0.9,1.0	-0.378
ENSG00000198715.11	GLMP	chr1	-	156294758	156295016	156294364	156294565	156295525	156295654	30,22	25,14	43,45	9,15	0.0292953	0.375,0.44	0.705,0.6	-0.245
ENSG00000197045.12	GMFB	chr14	-	54482121	54482202	54481394	54481458	54483670	54483767	98,66	3,8	227183	0,0	0.000213413	0.942,0.805	1.0,1.0	-0.127
ENSG00000087460.23	GNAS	chr20	+	58898940	58898985	58895611	58895684	58903530	58903585	11001106	19422159	14311288	10381208	3.90365e-11	0.258,0.239	0.458,0.396	-0.179
ENSG00000078369.17	GNB1	chr1	-	1853151	1853297	1839189	1839238	1890819	1891117	8,3	18,26	0,1	18,25	0.00845132	0.182,0.055	0.0,0.02	0.108
ENSG00000078369.17	GNB1	chr1	-	1839189	1839238	1825396	1825499	1890819	1890836	64104	5,22	71109	4,3	0.0158522	0.884,0.737	0.913,0.956	-0.124
ENSG00000185838.13	GNB1L	chr22	-	19821227	19821375	19812294	19812447	19854442	19854843	15,13	0,0	21,11	1,4	0.0135166	1.0,1.0	0.913,0.579	0.254
ENSG00000204628.11	GNB2L1	chr5	-	181238098	181238184	181236936	181237042	181239066	181239177	6,6	8,4	0,0	8,2	0.000393986	0.273,0.429	0.0,0.0	0.351
ENSG00000167110.16	GOLGA2	chr9	-	128267193	128267274	128265969	128266020	128267457	128267517	58,24	48,40	70,83	6,6	1.70013e-12	0.377,0.231	0.854,0.874	-0.56
ENSG00000167110.16	GOLGA2	chr9	-	128266286	128266325	128265969	128266020	128267457	128267517	351407	48,40	306303	6,6	2.71933e-08	0.826,0.868	0.971,0.97	-0.123
ENSG00000167110.16	GOLGA2	chr9	-	128267193	128267274	128266286	128266325	128267457	128267517	133,67	246302	186185	185170	6.48339e-07	0.213,0.1	0.335,0.352	-0.187
ENSG00000167110.16	GOLGA2	chr9	-	128272784	128272865	128268419	128268524	128273849	128273972	73,41	168289	97184	126117	1.92643e-06	0.178,0.066	0.278,0.44	-0.237
ENSG00000238105.7	GOLGA2P5	chr12	-	100168451	100168633	100167491	100167639	100170564	100170667	7,1	0,0	14,7	1,3	0.0426174	1.0,1.0	0.875,0.538	0.293
ENSG00000144674.16	GOLGA4	chr3	+	37289234	37289291	37281957	37282272	37294978	37295077	182286	44,80	202242	4,9	0	0.697,0.665	0.966,0.937	-0.27
ENSG00000144674.16	GOLGA4	chr3	+	37289234	37289289	37281957	37282272	37294978	37295077	58,87	44,80	32,44	4,9	1.85091e-05	0.427,0.38	0.819,0.734	-0.373
ENSG00000144674.16	GOLGA4	chr3	+	37361242	37361305	37355100	37355187	37366079	37366751	31,66	71,62	110113	38,53	0.000300494	0.188,0.361	0.606,0.531	-0.294
ENSG00000144674.16	GOLGA4	chr3	+	37286013	37286061	37282091	37282272	37289234	37289291	117,63	93137	152192	58,71	0.000604994	0.429,0.216	0.611,0.618	-0.292
ENSG00000144674.16	GOLGA4	chr3	+	37361197	37361305	37355100	37355187	37366079	37366751	28,67	71,62	69104	38,53	0.00683468	0.165,0.351	0.476,0.495	-0.227
ENSG00000143457.10	GOLPH3L	chr1	-	150694107	150694173	150661813	150661928	150694655	150694844	2,3	7,4	6,6	3,0	0.0427532	0.129,0.28	0.509,1.0	-0.55
ENSG00000111711.9	GOLT1B	chr12	+	21508382	21508561	21506884	21506976	21512294	21512376	34,45	0,12	64,70	0,2	0.0264688	1.0,0.652	1.0,0.946	-0.147
ENSG00000092978.10	GPATCH2	chr1	-	217495014	217495075	217491505	217491750	217498355	217498395	17,27	14,2	49,32	115,71	0.0186447	0.395,0.879	0.187,0.195	0.446
ENSG00000186566.12	GPATCH8	chr17	-	44438685	44438715	44436477	44436545	44464471	44465935	0,3	36,33	6,10	27,44	0.0141003	0.0,0.06	0.136,0.138	-0.107
ENSG00000062194.15	GPBP1	chr5	+	57237112	57237172	57235965	57236032	57246299	57246353	20,8	329299	105,83	350291	0	0.032,0.014	0.14,0.134	-0.114
ENSG00000159592.10	GPBP1L1	chr1	-	45685575	45685620	45660548	45661225	45686411	45686653	45,59	54,77	104,70	26,27	4.63011e-07	0.338,0.32	0.711,0.614	-0.333
ENSG00000125772.12	GPCPD1	chr20	-	5586193	5586269	5584280	5584322	5593326	5593411	0,0	14,19	20,19	9,10	1.92367e-11	0.0,0.0	0.526,0.487	-0.506
ENSG00000164850.14	GPER1	chr7	+	1088197	1088321	1086806	1087244	1091406	1093815	56,31	11,4	61,66	3,1	0.00998118	0.718,0.795	0.91,0.971	-0.184
ENSG00000171723.15	GPHN	chr14	+	67113017	67113171	67110139	67110259	67122255	67122377	15,17	5,0	9,25	0,0	0.0295484	0.6,1.0	1.0,1.0	-0.2
ENSG00000148358.19	GPR107	chr9	+	130110369	130110426	130107495	130107539	130124914	130124964	14,21	17,43	69,67	35,34	0.000882044	0.314,0.213	0.523,0.523	-0.26
ENSG00000173264.13	GPR137	chr11	+	64287720	64287946	64286964	64287014	64288339	64288468	13,9	0,0	58,28	3,4	0.0158632	1.0,1.0	0.906,0.778	0.158
ENSG00000173264.13	GPR137	chr11	+	64288064	64288214	64286964	64287014	64288339	64288468	33,14	0,0	48,68	3,4	0.036361	1.0,1.0	0.889,0.895	0.108
ENSG00000089351.14	GRAMD1A	chr19	+	35013255	35013368	35011473	35011554	35013540	35013691	37,45	21,26	46,27	1,6	0.00382509	0.468,0.464	0.958,0.692	-0.359
ENSG00000075240.16	GRAMD4	chr22	+	46676599	46676668	46675467	46675552	46677146	46679683	46,31	6,8	79,80	0,0	2.54471e-06	0.795,0.663	1.0,1.0	-0.271
ENSG00000068400.13	GRIPAP1	chrX	-	49000565	49000685	48999437	48999504	49000860	49000959	1,3	10,3	1,2	0,0	9.46507e-07	0.048,0.333	1.0,1.0	-0.809
ENSG00000068400.13	GRIPAP1	chrX	-	48997247	48997357	48993427	48993578	48999237	48999299	19,7	5,4	5,6	1,0	0.027139	0.655,0.467	0.714,1.0	-0.296
ENSG00000230189.6	GS1-124K5.2	chr7	-	66476258	66476327	66455658	66455853	66479008	66479096	27,21	0,0	11,22	2,3	0.0123647	1.0,1.0	0.736,0.788	0.238
ENSG00000230189.6	GS1-124K5.2	chr7	-	66480393	66480448	66479008	66479096	66481540	66481599	42,34	0,0	30,29	5,1	0.0132772	1.0,1.0	0.772,0.942	0.143
ENSG00000134202.10	GSTM3	chr1	-	109739849	109739908	109739428	109739493	109740239	109740511	23,10	8,2	35,31	0,0	3.23968e-05	0.611,0.732	1.0,1.0	-0.329
ENSG00000100226.15	GTPBP1	chr22	+	38727212	38727348	38726305	38726440	38727982	38728161	16,33	3,3	30,33	0,0	0.00642712	0.727,0.846	1.0,1.0	-0.214
ENSG00000163607.14	GTPBP8	chr3	+	112995136	112995265	112993074	112993124	112996891	112996991	2,4	2,3	27,29	3,1	0.0227674	0.333,0.4	0.818,0.935	-0.51
ENSG00000138867.16	GUCD1	chr22	-	24554948	24555136	24548916	24549001	24555614	24555859	44,59	11,16	79,54	48,36	0.0150174	0.667,0.648	0.451,0.429	0.217
ENSG00000143774.16	GUK1	chr1	+	228148370	228148539	228147620	228147699	228148664	228148808	137244	35,45	197288	32,15	0.0404429	0.662,0.731	0.755,0.906	-0.134
ENSG00000056998.18	GYG2	chrX	+	2877199	2877307	2875809	2875914	2881051	2881440	12,11	1,5	11,6	0,0	0.00215012	0.857,0.524	1.0,1.0	-0.309
ENSG00000085382.11	HACE1	chr6	-	104811310	104811393	104796928	104797025	104843222	104843298	11,22	3,4	15,9	0,1	0.0235377	0.647,0.733	1.0,0.818	-0.219
ENSG00000131373.14	HACL1	chr3	-	15591599	15591680	15589539	15589612	15596383	15596424	13,8	7,3	49,63	1,1	2.25865e-05	0.481,0.571	0.961,0.969	-0.439
ENSG00000063854.12	HAGH	chr16	-	1819114	1819223	1817188	1817271	1819896	1820014	278290	34,39	370395	3,2	0	0.803,0.788	0.984,0.99	-0.191
ENSG00000063854.12	HAGH	chr16	-	1826506	1826602	1822963	1823037	1826711	1826841	33,52	27,31	6,21	47,28	0.00278811	0.379,0.456	0.06,0.273	0.251
ENSG00000152240.12	HAUS1	chr18	+	46122466	46122590	46105193	46105368	46123298	46123364	49,21	0,1	55,82	6,10	0.00327711	1.0,0.913	0.821,0.804	0.144
ENSG00000147874.10	HAUS6	chr9	-	19063513	19063580	19063007	19063193	19070218	19070300	86,88	5,6	116103	1,0	0.0034066	0.899,0.883	0.984,1.0	-0.101
ENSG00000103145.10	HCFC1R1	chr16	-	3023473	3023530	3023232	3023361	3023846	3024246	80,91	44,70	82,66	21,11	0.000475913	0.503,0.419	0.684,0.769	-0.266
ENSG00000111727.11	HCFC2	chr12	+	104086846	104087014	104082712	104082901	104087985	104088038	30,28	0,0	45,62	4,4	0.012445	1.0,1.0	0.849,0.886	0.133
ENSG00000163517.14	HDAC11	chr3	+	13496735	13496852	13483463	13483564	13501870	13501933	0,8	2,11	12,7	0,0	3.47762e-07	0.0,0.267	1.0,1.0	-0.867
ENSG00000163517.14	HDAC11	chr3	+	13500712	13500789	13483463	13483564	13501870	13501933	31,29	2,11	51,42	0,0	0.000161389	0.886,0.569	1.0,1.0	-0.272
ENSG00000163517.14	HDAC11	chr3	+	13496735	13496852	13483463	13483564	13500712	13500789	1,7	9,15	12,7	4,5	0.0178147	0.053,0.189	0.6,0.412	-0.385
ENSG00000115677.16	HDLBP	chr2	-	241268957	241269295	241268476	241268541	241272760	241272834	9,0	11,31	0,0	15,20	0.019775	0.29,0.0	0.0,0.0	0.145
ENSG00000115677.16	HDLBP	chr2	-	241268828	241269295	241268498	241268541	241272760	241272831	15,6	11,31	3,0	15,20	0.0215884	0.405,0.088	0.091,0.0	0.201
ENSG00000115677.16	HDLBP	chr2	-	241269200	241269295	241268476	241268541	241272760	241272812	8,0	11,31	0,0	15,20	0.0290244	0.267,0.0	0.0,0.0	0.134
ENSG00000115677.16	HDLBP	chr2	-	241268828	241268953	241268476	241268541	241272760	241272813	7,9	11,31	3,0	15,20	0.0348963	0.241,0.127	0.091,0.0	0.139
ENSG00000155393.12	HEATR3	chr16	+	50072604	50072714	50070177	50070290	50075570	50075711	15,3	6,3	56,41	7,2	0.0478526	0.556,0.333	0.8,0.911	-0.411
ENSG00000068097.14	HEATR6	chr17	-	60073961	60074159	60073845	60073886	60076129	60076237	22,40	67100	13,18	191167	1.50066e-06	0.141,0.167	0.033,0.051	0.112
ENSG00000165338.16	HECTD2	chr10	+	91482966	91483076	91481093	91481139	91484506	91484655	46,9	0,0	44,23	4,2	0.0209963	1.0,1.0	0.846,0.852	0.151
ENSG00000165338.16	HECTD2	chr10	+	91487681	91487778	91485179	91485303	91491199	91491307	12,9	6,2	20,22	1,1	0.0222405	0.5,0.692	0.909,0.917	-0.317
ENSG00000198265.11	HELZ	chr17	-	67195418	67195470	67190156	67190355	67201128	67201185	207222	10,39	116141	0,0	1.99882e-07	0.923,0.767	1.0,1.0	-0.155
ENSG00000198265.11	HELZ	chr17	-	67193966	67194042	67190156	67190355	67201128	67201185	213151	10,39	129109	0,0	1.14679e-06	0.914,0.659	1.0,1.0	-0.214
ENSG00000114735.9	HEMK1	chr3	+	50578820	50578926	50577508	50577573	50579843	50579939	8,7	9,7	30,54	8,9	0.00490268	0.308,0.333	0.652,0.75	-0.381
ENSG00000114735.9	HEMK1	chr3	+	50572114	50572208	50571709	50571801	50577051	50577186	27,28	2,3	75,44	1,0	0.0417053	0.871,0.824	0.974,1.0	-0.14
ENSG00000148634.15	HERC4	chr10	-	67990210	67990400	67966682	67966802	67990903	67991015	23,30	0,1	25,19	1,13	0.00712169	1.0,0.938	0.926,0.422	0.295
ENSG00000122557.9	HERPUD2	chr7	-	35670214	35670328	35667433	35667588	35694183	35694566	27,27	0,1	61,24	8,11	0.000731756	1.0,0.931	0.792,0.522	0.308
ENSG00000188290.10	HES4	chr1	-	999691	999787	999525	999613	999865	1000111	75123	1,1	95103	11,5	0.0019134	0.974,0.984	0.812,0.912	0.117
ENSG00000169660.15	HEXDC	chr17	+	82440472	82440613	82439630	82439713	82440996	82441075	0,0	11,16	7,8	36,30	0.00421449	0.0,0.0	0.089,0.118	-0.103
ENSG00000198130.14	HIBCH	chr2	-	190208879	190208913	190205014	190205232	190212955	190213075	16,6	21,19	127106	11,11	1.70013e-12	0.341,0.177	0.887,0.868	-0.618
ENSG00000167861.15	HID1	chr17	-	74953544	74953651	74953005	74953086	74954137	74954972	60,69	13,4	175152	3,1	0.000291886	0.698,0.896	0.967,0.987	-0.18
ENSG00000172273.12	HINFP	chr11	+	119123567	119123684	119121590	119121639	119126934	119127106	11,8	3,7	7,8	0,0	6.39855e-05	0.647,0.364	1.0,1.0	-0.494
ENSG00000163349.21	HIPK1	chr1	+	113963391	113963521	113962316	113962438	113966129	113966272	158130	11,6	183153	0,0	5.37896e-05	0.878,0.915	1.0,1.0	-0.103
ENSG00000181666.17	HKR1	chr19	+	37322184	37322232	37318038	37318186	37323532	37323570	9,16	1,5	25,9	0,1	0.0223804	0.843,0.657	1.0,0.843	-0.171
ENSG00000101294.16	HM13	chr20	+	31566209	31566295	31561633	31561736	31569119	31569308	199181	32,14	281276	10,9	0.00105421	0.757,0.866	0.934,0.939	-0.125
ENSG00000147421.17	HMBOX1	chr8	+	29049289	29049394	29048959	29049048	29051017	29051549	37,66	27,39	12,10	24,20	0.00436562	0.407,0.458	0.2,0.2	0.232
ENSG00000147421.17	HMBOX1	chr8	+	29049289	29049361	29048956	29049048	29051017	29051549	31,73	27,39	11,13	24,20	0.0189575	0.365,0.483	0.186,0.245	0.208
ENSG00000117305.14	HMGCL	chr1	-	23814189	23814338	23808134	23808323	23816674	23816770	65,60	9,22	47,46	2,0	0.000210015	0.783,0.577	0.922,1.0	-0.281
ENSG00000117305.14	HMGCL	chr1	-	23810735	23810799	23808134	23808323	23814189	23814338	37,53	3,3	58,49	0,0	0.0272002	0.867,0.903	1.0,1.0	-0.115
ENSG00000146151.12	HMGCLL1	chr6	-	55514047	55514196	55495418	55495607	55541728	55541836	2,0	1,2	5,27	0,2	0.0059904	0.5,0.0	1.0,0.871	-0.685
ENSG00000205581.10	HMGN1	chr21	-	39345829	39345958	39345145	39345274	39347246	39347257	39,72	35,29	103184	21,26	0.00178243	0.358,0.554	0.71,0.78	-0.289
ENSG00000205581.10	HMGN1	chr21	-	39347246	39347292	39345935	39345958	39347378	39347483	10,11	1,1	0,6	3,2	0.0491442	0.859,0.87	0.0,0.646	0.542
ENSG00000182952.4	HMGN4	chr6	+	26539900	26540026	26538437	26538501	26545126	26546254	3,2	43,50	22,5	44,45	0.00381399	0.034,0.02	0.2,0.053	-0.1
ENSG00000100281.13	HMGXB4	chr22	+	35263981	35264096	35263795	35263874	35264647	35265603	31,54	6,12	18,17	15,17	0.00118235	0.721,0.692	0.375,0.333	0.352
ENSG00000152795.17	HNRNPDL	chr4	-	82425565	82425667	82424630	82424883	82426036	82426129	396759	240,93	76212	309173	0.00486895	0.452,0.803	0.11,0.38	0.383
ENSG00000152795.17	HNRNPDL	chr4	-	82425562	82425667	82424628	82424883	82426036	82426129	465917	240,93	114260	309173	0.00836762	0.492,0.831	0.156,0.429	0.369
ENSG00000152795.17	HNRNPDL	chr4	-	82425562	82425794	82424628	82424883	82426036	82426129	69160	240,93	38,48	309173	0.0157917	0.126,0.462	0.058,0.122	0.204
ENSG00000169045.17	HNRNPH1	chr5	-	179616898	179616922	179616097	179616218	179617020	179617110	5,4	173,37	29,16	124,57	2.02332e-05	0.021,0.075	0.15,0.174	-0.114
ENSG00000143889.15	HNRNPLL	chr2	-	38566106	38566200	38563185	38564237	38568198	38568297	19,22	59,42	1,4	78,59	1.51679e-07	0.139,0.208	0.006,0.033	0.154
ENSG00000143889.15	HNRNPLL	chr2	-	38566108	38566200	38563185	38564237	38568198	38568297	10,26	59,42	2,9	78,59	0.00291609	0.078,0.236	0.013,0.071	0.115
ENSG00000099783.11	HNRNPM	chr19	+	8462528	8462581	8455404	8455574	8463496	8463504	254133	5,18	577521	0,7	1.37885e-05	0.967,0.809	1.0,0.977	-0.1
ENSG00000228630.5	HOTAIR	chr12	-	53964230	53964283	53963900	53964124	53965963	53966059	0,0	9,7	7,10	9,7	3.02844e-05	0.0,0.0	0.309,0.45	-0.38
ENSG00000127483.17	HP1BP3	chr1	-	20780344	20780540	20779811	20779911	20787194	20787272	154144	5,3	183160	19,14	0.00660321	0.939,0.96	0.828,0.851	0.11
ENSG00000127483.17	HP1BP3	chr1	-	20780349	20780540	20779811	20779911	20787194	20787323	28,28	5,3	32,33	19,14	0.0235827	0.737,0.824	0.457,0.541	0.281
ENSG00000107521.18	HPS1	chr10	-	98431130	98431291	98430570	98430670	98433939	98434091	32,36	0,0	45,37	7,0	0.0130726	1.0,1.0	0.763,1.0	0.119
ENSG00000110756.17	HPS5	chr11	-	18317750	18317907	18311913	18312024	18322132	18322178	10,7	0,0	25,31	2,4	0.0211266	1.0,1.0	0.862,0.795	0.171
ENSG00000174775.16	HRAS	chr11	-	533276	533358	532241	532755	533452	533612	26,74	9,15	34,52	73,54	4.33705e-06	0.591,0.712	0.189,0.325	0.394
ENSG00000119471.14	HSDL2	chr9	+	112416840	112416944	112408906	112409021	112418859	112418958	151183	36,31	285257	11,7	5.23555e-09	0.677,0.747	0.928,0.948	-0.226
ENSG00000119471.14	HSDL2	chr9	+	112408906	112409021	112405623	112405722	112418859	112418958	93118	2,21	112,87	2,0	0.00118988	0.959,0.738	0.966,1.0	-0.134
ENSG00000025156.12	HSF2	chr6	+	122427902	122427956	122423580	122423686	122431429	122431514	9,5	51,58	20,18	38,35	0.00113779	0.091,0.047	0.23,0.226	-0.159
ENSG00000102878.16	HSF4	chr16	+	67167302	67167402	67167119	67167222	67167474	67167599	38,83	110142	4,0	35,24	3.65775e-05	0.147,0.226	0.054,0.0	0.16
ENSG00000102878.16	HSF4	chr16	+	67167512	67167599	67167119	67167222	67167823	67167917	49,44	5,13	12,4	0,0	0.00223925	0.831,0.629	1.0,1.0	-0.27
ENSG00000102878.16	HSF4	chr16	+	67167484	67167599	67167119	67167222	67167823	67167947	48,48	5,13	12,4	0,0	0.00233255	0.828,0.649	1.0,1.0	-0.262
ENSG00000102878.16	HSF4	chr16	+	67167302	67167402	67167119	67167222	67167823	67167947	26,62	5,13	4,5	0,0	0.00319102	0.722,0.705	1.0,1.0	-0.286
ENSG00000102878.16	HSF4	chr16	+	67167460	67167599	67167119	67167222	67167823	67167947	56,61	5,13	12,4	0,0	0.00355536	0.848,0.701	1.0,1.0	-0.226
ENSG00000187522.13	HSPA14	chr10	+	14851223	14851323	14849720	14849811	14852369	14852531	21,6	5,4	57,34	0,0	1.54448e-05	0.677,0.429	1.0,1.0	-0.447
ENSG00000187522.13	HSPA14	chr10	+	14851218	14851323	14849720	14849811	14852369	14852531	24,7	5,4	72,37	0,0	1.92482e-05	0.706,0.467	1.0,1.0	-0.413
ENSG00000081870.11	HSPB11	chr1	-	53928371	53928440	53923532	53923947	53930038	53930145	222235	5,34	321253	5,2	0.000316734	0.957,0.778	0.97,0.985	-0.11
ENSG00000081870.11	HSPB11	chr1	-	53928371	53928435	53923532	53923947	53930038	53930145	165153	5,34	212176	5,2	0.00253969	0.946,0.703	0.957,0.979	-0.143
ENSG00000134330.18	IAH1	chr2	+	9475986	9476039	9473817	9473899	9478221	9478370	51,49	1,7	75,92	1,0	0.0103335	0.967,0.801	0.977,1.0	-0.104
ENSG00000005700.14	IBTK	chr6	-	82175903	82176026	82173366	82173438	82181878	82182028	6,20	96,83	32,39	70,60	4.67881e-05	0.03,0.108	0.186,0.245	-0.146
ENSG00000112144.15	ICK	chr6	-	53045665	53045789	53041135	53041408	53061595	53061770	0,1	16,9	7,6	20,25	0.0119424	0.0,0.053	0.149,0.107	-0.102
ENSG00000235092.5	ID2-AS1	chr2	-	8675743	8676029	8673149	8673307	8677977	8678334	11,12	0,0	17,16	0,8	0.0106951	1.0,1.0	1.0,0.5	0.25
ENSG00000119912.15	IDE	chr10	-	92507574	92507666	92506441	92506522	92508112	92508205	48,29	0,7	110,94	0,0	0.00893305	1.0,0.674	1.0,1.0	-0.163
ENSG00000119912.15	IDE	chr10	-	92507574	92507732	92506441	92506522	92508112	92508205	39,21	0,7	72,58	0,0	0.0103695	1.0,0.6	1.0,1.0	-0.2
ENSG00000119912.15	IDE	chr10	-	92559033	92559215	92537365	92537550	92573921	92574067	11,4	22,15	6,1	55,36	0.0108827	0.2,0.118	0.052,0.014	0.126
ENSG00000165948.10	IFI27L1	chr14	+	94100738	94100771	94096886	94096965	94102476	94102709	5,1	6,10	16,11	2,1	0.000132644	0.364,0.064	0.846,0.883	-0.651
ENSG00000165948.10	IFI27L1	chr14	+	94101813	94101975	94096886	94096965	94102476	94102714	23,20	6,10	27,23	2,1	0.0121727	0.657,0.5	0.871,0.92	-0.317
ENSG00000165948.10	IFI27L1	chr14	+	94100738	94100771	94096886	94096965	94101813	94101975	5,5	4,5	26,15	4,1	0.0164184	0.462,0.407	0.817,0.911	-0.429
ENSG00000163913.11	IFT122	chr3	+	129492140	129492194	129488256	129488397	129495445	129495607	71,49	61,28	170140	20,56	0.0142479	0.398,0.499	0.829,0.587	-0.259
ENSG00000122970.15	IFT81	chr12	+	110143381	110143545	110136775	110136860	110146952	110147048	68,45	0,2	39,58	2,9	0.0150371	1.0,0.918	0.907,0.763	0.124
ENSG00000032742.17	IFT88	chr13	+	20663262	20663386	20656364	20656430	20663497	20663604	0,2	13,18	8,3	19,15	0.0405921	0.0,0.053	0.174,0.091	-0.106
ENSG00000126246.9	IGFLR1	chr19	-	35739709	35739769	35739527	35739626	35740379	35740549	7,1	1,0	16,14	8,8	0.01877	0.792,1.0	0.52,0.487	0.392
ENSG00000126246.9	IGFLR1	chr19	-	35739709	35740086	35739256	35739626	35740379	35740564	5,1	1,0	11,13	8,8	0.0266115	0.714,1.0	0.407,0.448	0.429
ENSG00000126246.9	IGFLR1	chr19	-	35739709	35740088	35738800	35739626	35740379	35740564	8,1	1,0	24,27	8,8	0.0327134	0.8,1.0	0.6,0.628	0.286
ENSG00000126246.9	IGFLR1	chr19	-	35739709	35740088	35738800	35739626	35741023	35741223	5,1	4,0	12,13	0,0	0.046411	0.385,1.0	1.0,1.0	-0.307
ENSG00000126246.9	IGFLR1	chr19	-	35739709	35739769	35739527	35739626	35741023	35741223	5,1	4,0	11,13	0,0	0.0489454	0.404,1.0	1.0,1.0	-0.298
ENSG00000177663.13	IL17RA	chr22	+	17105852	17105954	17105590	17105602	17107726	17107768	28,43	11,7	51,49	4,1	0.0155658	0.56,0.754	0.864,0.961	-0.255
ENSG00000056736.9	IL17RB	chr3	+	53855293	53855341	53852870	53852997	53856843	53856986	22,9	10,1	23,31	2,0	0.0111948	0.568,0.843	0.873,1.0	-0.231
ENSG00000129351.17	ILF3	chr19	+	10678612	10678704	10677162	10677310	10679096	10679192	197179	28,15	377333	2,7	1.16171e-08	0.779,0.856	0.99,0.96	-0.157
ENSG00000129351.17	ILF3	chr19	+	10680345	10680443	10679815	10679927	10681018	10681130	145155	9,15	230207	2,0	1.74831e-06	0.89,0.838	0.983,1.0	-0.128
ENSG00000129351.17	ILF3	chr19	+	10688501	10688678	10687345	10687708	10689178	10689847	67,51	0,0	87,51	4,9	0.000548236	1.0,1.0	0.916,0.739	0.172
ENSG00000105135.15	ILVBL	chr19	-	15115565	15115671	15115271	15115430	15115849	15115921	434562	46,27	229200	0,1	1.47594e-08	0.825,0.912	1.0,0.99	-0.126
ENSG00000148950.9	IMMP1L	chr11	-	31463171	31463305	31433459	31433570	31488127	31488241	0,2	3,1	9,16	0,0	5.36369e-05	0.0,0.5	1.0,1.0	-0.75
ENSG00000148950.9	IMMP1L	chr11	-	31460625	31460714	31433459	31433570	31463171	31463305	8,12	0,2	8,13	8,13	0.00271725	1.0,0.75	0.333,0.333	0.542
ENSG00000133731.9	IMPA1	chr8	-	81670938	81671047	81660515	81660667	81673840	81673949	19,35	3,3	84101	0,0	0.00453481	0.76,0.854	1.0,1.0	-0.193
ENSG00000154059.9	IMPACT	chr18	+	24437954	24438040	24430321	24430384	24440495	24440618	43,40	6,5	93116	1,2	0.00230037	0.782,0.8	0.979,0.967	-0.182
ENSG00000203485.12	INF2	chr14	+	104715283	104715340	104714202	104714856	104718794	104719605	106,87	3,20	103,60	1,0	0.000391658	0.952,0.707	0.983,1.0	-0.162
ENSG00000071243.15	ING3	chr7	+	120964741	120964838	120955558	120955624	120966625	120966697	32,12	7,12	50,49	4,1	0.00444034	0.696,0.333	0.862,0.961	-0.397
ENSG00000148153.13	INIP	chr9	-	112701787	112701880	112697438	112697582	112716460	112716541	1,1	2,2	15,11	0,0	2.78432e-05	0.2,0.2	1.0,1.0	-0.8
ENSG00000108506.11	INTS2	chr17	-	61895314	61895383	61893764	61893899	61897468	61897583	263212	14,24	431361	3,3	4.06044e-08	0.905,0.818	0.986,0.984	-0.124
ENSG00000068745.14	IP6K2	chr3	-	48715388	48715527	48694623	48695421	48717156	48717214	9,31	14,32	3,2	31,30	3.46747e-06	0.243,0.326	0.046,0.032	0.245
ENSG00000068745.14	IP6K2	chr3	-	48715314	48715527	48695168	48695418	48717156	48717216	25,41	24,33	1,6	20,23	2.88576e-05	0.342,0.383	0.024,0.115	0.293
ENSG00000068745.14	IP6K2	chr3	-	48715388	48715527	48694050	48695418	48717156	48717214	49,73	24,33	11,10	20,23	0.000108906	0.505,0.525	0.216,0.179	0.318
ENSG00000173226.16	IQCB1	chr3	-	121788283	121788432	121781742	121781874	121790072	121790215	74,94	2,0	57,68	4,8	0.00401266	0.949,1.0	0.877,0.81	0.131
ENSG00000106012.17	IQCE	chr7	+	2567115	2567163	2559047	2559217	2568953	2568999	44,27	11,11	76,75	9,1	0.00554864	0.705,0.595	0.835,0.978	-0.257
ENSG00000103599.19	IQCH	chr15	+	67359846	67359885	67357344	67357421	67372110	67372444	2,6	0,0	20,18	3,4	0.00658446	1.0,1.0	0.812,0.745	0.222
ENSG00000259673.5	IQCH-AS1	chr15	-	67411895	67412041	67403618	67408475	67421334	67421498	0,1	8,9	6,3	16,4	0.0140858	0.0,0.053	0.158,0.273	-0.189
ENSG00000174628.16	IQCK	chr16	+	19763847	19764112	19735413	19735450	19788837	19788922	24,27	0,0	44,45	0,12	0.00668729	1.0,1.0	1.0,0.652	0.174
ENSG00000174628.16	IQCK	chr16	+	19788837	19788922	19733697	19733827	19827025	19827137	18,7	6,0	18,19	0,0	0.0085747	0.6,1.0	1.0,1.0	-0.2
ENSG00000174628.16	IQCK	chr16	+	19735413	19735450	19733697	19733827	19788837	19788922	0,0	6,7	0,7	5,10	0.0109586	0.0,0.0	0.0,0.316	-0.158
ENSG00000184216.11	IRAK1	chrX	-	154013042	154013343	154012528	154012678	154014041	154014278	93,45	6,7	220,99	0,4	0.00296893	0.886,0.763	1.0,0.925	-0.138
ENSG00000198001.13	IRAK4	chr12	+	43760924	43760972	43758949	43759016	43768102	43768272	8,2	5,5	18,3	1,0	0.00026989	0.489,0.193	0.915,1.0	-0.617
ENSG00000126456.15	IRF3	chr19	-	49660712	49660844	49659571	49659833	49661947	49662328	34,69	6,0	96,68	0,0	0.0399813	0.739,1.0	1.0,1.0	-0.131
ENSG00000185507.19	IRF7	chr11	-	614173	614399	613950	614037	614475	614534	9,23	1,2	11,10	11,10	0.000459186	0.818,0.852	0.333,0.333	0.502
ENSG00000136003.15	ISCU	chr12	+	108564059	108564155	108562605	108562736	108564278	108564392	58,98	72,82	16,10	224169	0	0.287,0.374	0.034,0.029	0.299
ENSG00000063241.7	ISOC2	chr19	-	55455635	55455845	55455259	55455330	55456348	55456489	76143	78,44	434237	47,21	0.000221293	0.328,0.619	0.822,0.849	-0.362
ENSG00000063241.7	ISOC2	chr19	-	55455635	55455845	55455259	55455378	55456348	55456489	30,54	15,13	173,90	17,4	0.00283807	0.5,0.675	0.836,0.918	-0.289
ENSG00000105655.18	ISYNA1	chr19	-	18437598	18437760	18436329	18436479	18437859	18437988	13,10	42,10	55,43	12,8	1.48008e-06	0.134,0.333	0.696,0.729	-0.479
ENSG00000105655.18	ISYNA1	chr19	-	18436683	18436728	18436329	18436479	18437859	18438111	10,7	42,10	19,31	12,8	0.00110775	0.128,0.301	0.493,0.704	-0.384
ENSG00000105655.18	ISYNA1	chr19	-	18436972	18437105	18436329	18436479	18437598	18437760	1,16	0,0	48,20	10,5	0.00119778	1.0,1.0	0.706,0.667	0.314
ENSG00000105655.18	ISYNA1	chr19	-	18436972	18437105	18436329	18436479	18437859	18437988	0,0	42,10	0,11	12,8	0.00548111	0.0,0.0	0.0,0.407	-0.203
ENSG00000105655.18	ISYNA1	chr19	-	18436972	18437105	18436683	18436877	18437859	18437988	16,18	0,1	37,28	9,4	0.00592065	1.0,0.9	0.673,0.778	0.224
ENSG00000105655.18	ISYNA1	chr19	-	18437598	18437760	18436972	18437105	18437859	18437988	14,26	0,0	93,58	0,11	0.0177452	1.0,1.0	1.0,0.725	0.137
ENSG00000105655.18	ISYNA1	chr19	-	18436683	18436877	18436329	18436479	18437859	18438111	41,42	42,10	78,73	12,8	0.0490155	0.328,0.677	0.765,0.82	-0.29
ENSG00000005884.17	ITGA3	chr17	+	50076973	50077112	50076624	50076681	50077378	50077447	35,46	1,5	72,67	0,0	0.020472	0.946,0.821	1.0,1.0	-0.117
ENSG00000119185.12	ITGB1BP1	chr2	-	9414177	9414256	9412268	9412405	9423372	9423522	92100	6,14	179169	3,1	0.000125657	0.885,0.781	0.968,0.988	-0.145
ENSG00000119185.12	ITGB1BP1	chr2	-	9418625	9418732	9412268	9412405	9423372	9423430	65,54	6,14	68,58	3,1	0.0118707	0.844,0.659	0.919,0.967	-0.192
ENSG00000119185.12	ITGB1BP1	chr2	-	9419989	9420100	9418625	9418732	9422478	9422566	17,13	14,8	33,3	43,40	0.0297566	0.378,0.448	0.277,0.036	0.257
ENSG00000142856.16	ITGB3BP	chr1	-	63508527	63508570	63490102	63490218	63523128	63523502	18,25	0,0	21,30	3,3	0.0195118	1.0,1.0	0.814,0.862	0.162
ENSG00000132470.13	ITGB4	chr17	+	75755700	75755849	75754575	75754815	75756428	75756617	272451	33,23	214239	1,3	1.84575e-06	0.805,0.907	0.991,0.976	-0.127
ENSG00000205726.13	ITSN1	chr21	+	33823486	33823653	33819240	33819323	33826817	33826863	16,16	3,2	23,25	0,1	0.0312276	0.727,0.8	1.0,0.926	-0.2
ENSG00000128928.8	IVD	chr15	+	40414873	40414982	40412966	40413087	40415400	40415482	15,10	3,3	68,38	0,3	0.0383167	0.714,0.625	1.0,0.864	-0.262
ENSG00000128928.8	IVD	chr15	+	40414822	40414982	40412966	40413087	40415400	40415461	14,11	3,3	65,38	0,3	0.0389605	0.7,0.647	1.0,0.864	-0.258
ENSG00000043143.20	JADE2	chr5	+	134576767	134576896	134573644	134573762	134578496	134579475	106,61	13,6	88,89	1,5	0.0455015	0.803,0.836	0.978,0.899	-0.119
ENSG00000171988.17	JMJD1C	chr10	-	63219877	63219983	63217206	63217331	63380317	63380482	10,13	3,1	8,14	0,0	0.0479633	0.625,0.867	1.0,1.0	-0.254
ENSG00000161677.11	JOSD2	chr19	-	50507573	50507699	50506377	50506572	50510285	50510448	64,69	22,22	176125	23,12	0.00249046	0.593,0.611	0.793,0.839	-0.214
ENSG00000161677.11	JOSD2	chr19	-	50507573	50507688	50506445	50506572	50510285	50510448	39,35	22,22	103,70	23,12	0.00296893	0.47,0.443	0.691,0.745	-0.261
ENSG00000225470.6	JPX	chrX	+	73946998	73947374	73944583	73944662	73994839	73994961	0,2	5,2	15,35	9,14	0.0140003	0.0,0.333	0.455,0.556	-0.339
ENSG00000172977.12	KAT5	chr11	+	65713347	65713503	65712921	65713058	65713592	65713667	27,66	146161	87111	124154	0.000213622	0.085,0.17	0.26,0.265	-0.135
ENSG00000244558.5	KCNK15-AS1	chr20	-	44737510	44737570	44716624	44716793	44738819	44738934	0,0	3,12	2,5	9,8	0.00628777	0.0,0.0	0.108,0.253	-0.18
ENSG00000244558.5	KCNK15-AS1	chr20	-	44716624	44716793	44694891	44695507	44738819	44738896	16,42	0,1	17,15	1,6	0.00777667	1.0,0.955	0.895,0.556	0.252
ENSG00000104783.11	KCNN4	chr19	-	43776540	43776636	43774560	43774619	43780702	43781257	38,32	8,1	33,27	1,0	0.0145386	0.704,0.941	0.943,1.0	-0.149
ENSG00000153885.14	KCTD15	chr19	+	33798263	33798390	33796845	33796987	33798670	33798766	13,11	4,8	1,0	1,9	0.00108162	0.619,0.407	0.333,0.0	0.347
ENSG00000112078.13	KCTD20	chr6	+	36465600	36465698	36443006	36443111	36470051	36470257	1,0	11,21	6,7	18,10	0.00121819	0.043,0.0	0.143,0.259	-0.18
ENSG00000104756.15	KCTD9	chr8	-	25444291	25444306	25440542	25440673	25446128	25446250	3,1	7,3	5,4	0,0	5.02447e-06	0.263,0.217	1.0,1.0	-0.76
ENSG00000104756.15	KCTD9	chr8	-	25444291	25444345	25440542	25440673	25446128	25446250	16,7	7,3	11,17	0,0	6.39855e-05	0.565,0.57	1.0,1.0	-0.433
ENSG00000104756.15	KCTD9	chr8	-	25444291	25444335	25440623	25440673	25446128	25446250	45,34	7,3	57,61	0,0	0.000404889	0.799,0.875	1.0,1.0	-0.163
ENSG00000127663.14	KDM4B	chr19	+	5071009	5071059	5047475	5047669	5077366	5077470	65,42	0,1	39,26	1,9	0.00442392	1.0,0.961	0.958,0.63	0.186
ENSG00000117139.16	KDM5B	chr1	-	202774675	202774699	202773117	202773288	202777016	202777094	0,6	8,3	0,0	4,1	0.047188	0.0,0.601	0.0,0.0	0.3
ENSG00000147050.14	KDM6A	chrX	+	45010960	45011019	44974665	44974715	45034930	45034985	7,14	5,0	9,12	0,0	0.0350197	0.434,1.0	1.0,1.0	-0.283
ENSG00000235750.9	KIAA0040	chr1	-	175192639	175192716	175177610	175177684	175192859	175192999	5,21	0,0	13,12	4,2	0.000899912	1.0,1.0	0.619,0.75	0.316
ENSG00000235750.9	KIAA0040	chr1	-	175177610	175177684	175166561	175166737	175192639	175192716	8,27	6,5	23,21	2,0	0.0142174	0.4,0.73	0.852,1.0	-0.361
ENSG00000047578.12	KIAA0556	chr16	+	27631064	27631162	27628660	27628830	27648603	27648735	67,39	0,7	101,84	0,0	0.0142031	1.0,0.736	1.0,1.0	-0.132
ENSG00000198920.9	KIAA0753	chr17	-	6624754	6624861	6623508	6623571	6628116	6628487	29,15	7,12	34,38	2,0	0.000188288	0.674,0.385	0.895,1.0	-0.418
ENSG00000136051.13	KIAA1033	chr12	+	105156725	105156792	105152342	105152451	105157235	105157322	46,63	6,4	115118	1,0	0.000709927	0.798,0.89	0.983,1.0	-0.147
ENSG00000138688.15	KIAA1109	chr4	+	122251031	122251217	122250361	122250573	122254194	122254346	4,4	17,9	0,0	32,12	0.00507595	0.105,0.182	0.0,0.0	0.143
ENSG00000120549.16	KIAA1217	chr10	+	24494499	24494604	24473227	24474060	24495146	24495196	4,8	37,57	10,3	8,4	0.00295533	0.051,0.066	0.385,0.273	-0.271
ENSG00000120549.16	KIAA1217	chr10	+	24542692	24542770	24536773	24536893	24544980	24545268	13,25	0,0	9,1	1,3	0.00911396	1.0,1.0	0.818,0.143	0.52
ENSG00000150477.14	KIAA1328	chr18	+	37084124	37084232	37066889	37067545	37160199	37160381	12,9	4,3	0,1	2,3	0.00119778	0.6,0.6	0.0,0.143	0.528
ENSG00000173214.5	KIAA1919	chr6	+	111263829	111263946	111262256	111262425	111265875	111271167	30,39	6,0	49,61	0,1	0.0417733	0.714,1.0	1.0,0.968	-0.127
ENSG00000134313.14	KIDINS220	chr2	-	8747886	8748000	8736867	8736999	8750111	8750335	40,68	12,3	94,86	2,0	0.00123225	0.625,0.919	0.959,1.0	-0.208
ENSG00000118193.11	KIF14	chr1	-	200619551	200619674	200617611	200618838	200620410	200620734	7,2	30,35	21,20	30,18	0.000133934	0.104,0.028	0.259,0.357	-0.242
ENSG00000118193.11	KIF14	chr1	-	200619583	200619674	200617611	200618838	200620410	200620734	2,2	30,35	9,11	30,18	0.00209681	0.032,0.028	0.13,0.234	-0.152
ENSG00000089177.17	KIF16B	chr20	-	16356329	16356452	16335925	16336015	16370585	16370636	25,22	1,11	22,17	0,0	0.00166273	0.926,0.5	1.0,1.0	-0.287
ENSG00000186185.13	KIF18B	chr17	-	44934830	44934935	44934506	44934617	44935258	44935416	24,30	8,1	57,31	0,0	0.00132127	0.6,0.938	1.0,1.0	-0.231
ENSG00000129250.11	KIF1C	chr17	+	4999849	4999970	4997947	4998156	5001221	5001401	9,16	7,2	36,21	0,0	0.000165635	0.391,0.8	1.0,1.0	-0.404
ENSG00000137807.13	KIF23	chr15	+	69440767	69441079	69440307	69440487	69444789	69445041	85123	44,29	45,82	156163	1.15864e-09	0.491,0.68	0.126,0.201	0.422
ENSG00000151657.11	KIN	chr10	-	7783080	7783175	7780263	7780307	7787819	7787981	47,64	1,1	80,84	3,15	0.0134003	0.959,0.97	0.93,0.737	0.131
ENSG00000126214.21	KLC1	chr14	+	103684985	103685036	103679383	103679545	103687080	103687211	2,1	17,5	36,25	15,11	1.59316e-06	0.064,0.104	0.583,0.57	-0.493
ENSG00000126214.21	KLC1	chr14	+	103687080	103687211	103679383	103679545	103700654	103700727	46,27	4,2	29,43	12,26	0.00029665	0.852,0.871	0.547,0.453	0.361
ENSG00000126214.21	KLC1	chr14	+	103692358	103692425	103679407	103679518	103700654	103700727	0,1	16,24	4,2	6,8	0.0185359	0.0,0.021	0.255,0.114	-0.174
ENSG00000126214.21	KLC1	chr14	+	103684985	103685036	103679383	103679518	103687080	103687211	4,13	16,15	26,40	18,10	0.0296865	0.127,0.336	0.457,0.7	-0.347
ENSG00000109787.12	KLF3	chr4	+	38687962	38688186	38680586	38680682	38688584	38689071	13,17	43,83	2,0	44,65	2.41817e-05	0.131,0.093	0.022,0.0	0.101
ENSG00000104731.13	KLHDC4	chr16	-	87707957	87708075	87703025	87703432	87708349	87708458	19,9	5,1	23,28	0,1	0.00774283	0.655,0.818	1.0,0.933	-0.23
ENSG00000104731.13	KLHDC4	chr16	-	87765065	87765340	87761957	87762040	87765791	87765961	7,3	11,13	4,3	60,40	0.0362746	0.241,0.103	0.032,0.036	0.138
ENSG00000117153.15	KLHL12	chr1	-	202893305	202893425	202891115	202892659	202894183	202894282	79,85	3,0	110124	11,19	0.00046791	0.929,1.0	0.833,0.765	0.166
ENSG00000117153.15	KLHL12	chr1	-	202893238	202893425	202891099	202892659	202894183	202894282	118121	3,0	183191	11,19	0.000778798	0.952,1.0	0.893,0.834	0.113
ENSG00000117153.15	KLHL12	chr1	-	202893238	202893419	202891099	202892659	202894183	202894282	40,37	3,0	75,67	11,19	0.00679565	0.87,1.0	0.773,0.638	0.23
ENSG00000117153.15	KLHL12	chr1	-	202893238	202893344	202891099	202892659	202894183	202894282	39,36	3,0	75,68	11,19	0.00813721	0.867,1.0	0.773,0.642	0.226
ENSG00000109466.13	KLHL2	chr4	+	165228806	165228913	165219933	165220059	165238777	165238899	8,9	41,17	19,14	6,11	0.00227721	0.089,0.209	0.613,0.389	-0.352
ENSG00000167548.14	KMT2D	chr12	-	49024052	49024100	49022589	49022875	49024577	49024624	2,0	35,21	11,1	17,27	0.0176126	0.033,0.0	0.279,0.022	-0.134
ENSG00000005483.19	KMT2E	chr7	+	105039152	105039269	105038125	105038199	105040838	105040856	7,4	14,10	0,0	11,9	0.00116442	0.2,0.167	0.0,0.0	0.183
ENSG00000103550.13	KNOP1	chr16	-	19710508	19710586	19707164	19707221	19714117	19714577	73,42	2,4	156132	0,0	0.0367082	0.948,0.84	1.0,1.0	-0.106
ENSG00000184445.11	KNTC1	chr12	+	122601535	122601625	122597730	122597938	122602568	122602740	43,37	10,1	67,68	0,0	0.000502331	0.683,0.949	1.0,1.0	-0.184
ENSG00000196911.9	KPNA5	chr6	+	116692054	116692156	116689319	116689453	116698703	116698798	81129	1,4	47,61	6,8	0.00907484	0.976,0.942	0.797,0.792	0.164
ENSG00000196911.9	KPNA5	chr6	+	116715211	116715292	116705071	116705160	116716218	116716318	1,1	20,10	9,2	3,8	0.0141105	0.024,0.048	0.6,0.111	-0.32
ENSG00000196911.9	KPNA5	chr6	+	116705071	116705160	116702018	116702150	116716218	116716318	40,27	1,0	18,38	2,5	0.0161641	0.952,1.0	0.818,0.792	0.171
ENSG00000196911.9	KPNA5	chr6	+	116715214	116715292	116705071	116705160	116716218	116716318	1,1	20,10	9,1	3,8	0.0457945	0.024,0.048	0.6,0.059	-0.293
ENSG00000126777.17	KTN1	chr14	+	55663954	55664041	55661521	55661612	55667240	55667330	94,73	252196	113115	98138	1.78687e-06	0.157,0.157	0.366,0.294	-0.173
ENSG00000198910.12	L1CAM	chrX	-	153863882	153864017	153863476	153863549	153864321	153864477	7,31	9,3	13,8	0,0	0.000671445	0.28,0.838	1.0,1.0	-0.441
ENSG00000133424.20	LARGE	chr22	-	33847656	33847741	33761370	33761558	33856739	33856802	13,13	23,19	1,6	46,40	8.42731e-05	0.22,0.255	0.011,0.07	0.197
ENSG00000133424.20	LARGE	chr22	-	33856739	33856802	33761370	33761558	33919994	33920421	42,24	61,49	84,77	62,53	0.00254505	0.267,0.206	0.418,0.435	-0.19
ENSG00000133424.20	LARGE	chr22	-	33765843	33765953	33761370	33761558	33856739	33856802	16,23	23,19	7,13	46,40	0.00265596	0.258,0.377	0.071,0.14	0.212
ENSG00000133424.20	LARGE	chr22	-	33830066	33830209	33761370	33761558	33847656	33847741	5,2	7,6	1,4	0,1	0.0122971	0.263,0.143	1.0,0.667	-0.631
ENSG00000133424.20	LARGE	chr22	-	33856739	33856802	33650366	33650668	33919994	33920421	23,5	4,3	38,38	2,0	0.0138941	0.753,0.469	0.91,1.0	-0.344
ENSG00000155506.16	LARP1	chr5	+	154793799	154793901	154793594	154793723	154794099	154794262	87,77	1,0	78,80	6,6	0.002261	0.978,1.0	0.867,0.87	0.12
ENSG00000155506.16	LARP1	chr5	+	154793799	154793922	154793594	154793723	154794099	154794262	87,77	1,0	78,82	6,6	0.00238087	0.978,1.0	0.867,0.872	0.12
ENSG00000107929.14	LARP4B	chr10	-	870012	870083	864122	864270	884446	884506	43,34	26,31	25,11	86,57	2.87062e-07	0.453,0.354	0.127,0.088	0.296
ENSG00000107929.14	LARP4B	chr10	-	870008	870083	864153	864270	884446	884506	12,25	26,31	19,9	86,57	0.00552356	0.187,0.287	0.099,0.073	0.151
ENSG00000150457.8	LATS2	chr13	-	20979690	20979797	20973031	20975364	20981465	20981648	28,36	5,2	62,30	0,0	0.0028303	0.737,0.9	1.0,1.0	-0.181
ENSG00000167615.16	LENG8	chr19	+	54451289	54451382	54448886	54449310	54452092	54452267	53,86	7,4	55,56	0,0	0.00168888	0.791,0.915	1.0,1.0	-0.147
ENSG00000050426.15	LETMD1	chr12	+	51052091	51052207	51049033	51049185	51056349	51056391	196168	158178	119108	54,70	0.043327	0.383,0.321	0.524,0.435	-0.128
ENSG00000105486.13	LIG1	chr19	-	48133980	48134066	48132981	48133097	48135679	48135779	63116	14,13	211207	8,11	0.00881039	0.692,0.817	0.93,0.904	-0.163
ENSG00000005156.11	LIG3	chr17	+	34996573	34996653	34996063	34996195	34997737	34997825	16,30	0,0	65,37	0,6	0.04355	1.0,1.0	1.0,0.755	0.123
ENSG00000181798.2	LINC00471	chr2	-	231513526	231513632	231508425	231509343	231514081	231514339	13,13	0,0	19,13	2,3	0.0125038	1.0,1.0	0.826,0.684	0.245
ENSG00000227036.6	LINC00511	chr17	-	72431127	72431224	72428235	72428298	72592202	72592804	30,16	9,6	47,52	2,1	0.000309654	0.625,0.571	0.922,0.963	-0.345
ENSG00000227036.6	LINC00511	chr17	-	72420699	72420964	72404638	72404816	72428235	72428298	26,6	16,9	1,6	25,21	0.001021	0.448,0.25	0.02,0.125	0.276
ENSG00000237854.3	LINC00674	chr17	+	68102819	68103058	68101907	68101959	68114421	68114525	106104	34,79	182180	28,25	0.0018477	0.609,0.397	0.765,0.783	-0.271
ENSG00000237854.3	LINC00674	chr17	+	68102942	68103058	68101907	68101959	68114421	68114525	175169	34,79	271268	28,25	0.00299116	0.72,0.517	0.829,0.843	-0.217
ENSG00000215190.8	LINC00680	chr6	-	57949858	57950011	57948917	57949068	57959027	57959111	19,7	0,0	15,28	8,3	0.000644212	1.0,1.0	0.484,0.824	0.346
ENSG00000242516.1	LINC00960	chr3	+	75675967	75676128	75675763	75675880	75678832	75679303	11,18	13,1	15,21	0,0	0.00130352	0.297,0.9	1.0,1.0	-0.401
ENSG00000242516.1	LINC00960	chr3	+	75673846	75674006	75673193	75673238	75675763	75675880	14,14	5,1	18,16	1,0	0.0225129	0.583,0.875	0.9,1.0	-0.221
ENSG00000228486.9	LINC01125	chr2	+	97675630	97675721	97674455	97674557	97675844	97675928	22,10	0,0	16,1	1,3	0.0203737	1.0,1.0	0.889,0.143	0.484
ENSG00000183250.11	LINC01547	chr21	-	44937538	44937682	44935626	44935890	44939592	44939845	0,0	9,1	2,4	5,6	0.0135679	0.0,0.0	0.167,0.25	-0.209
ENSG00000272888.5	LINC01578	chr15	+	92883584	92883778	92882873	92883186	92885514	92885585	116118	27,21	58,90	26,39	0.0198856	0.682,0.738	0.527,0.536	0.178
ENSG00000231721.6	LINC-PINT	chr7	-	131052429	131052555	130984052	130984109	131107719	131108803	9,12	2,4	8,5	1,0	0.0338238	0.692,0.6	0.8,1.0	-0.254
ENSG00000272779.1	LL22NC03-80A10.6	chr22	+	22308696	22308819	22307105	22307245	22309735	22309883	5,1	0,0	16,8	0,7	0.0221089	1.0,1.0	1.0,0.364	0.318
ENSG00000073350.13	LLGL2	chr17	+	75574452	75574495	75574217	75574260	75574609	75574779	186200	80107	456375	130,91	0.00287456	0.592,0.539	0.687,0.72	-0.138
ENSG00000073350.13	LLGL2	chr17	+	75574416	75574495	75574217	75574260	75574609	75574668	61,78	80107	175121	130,91	0.0127797	0.276,0.267	0.402,0.399	-0.129
ENSG00000073350.13	LLGL2	chr17	+	75574453	75574495	75574217	75574260	75574609	75574779	54,72	80107	157108	130,91	0.018051	0.299,0.298	0.432,0.428	-0.132
ENSG00000073350.13	LLGL2	chr17	+	75574110	75574260	75573951	75573980	75574870	75575207	40,37	5,2	37,24	1,0	0.0321555	0.8,0.902	0.949,1.0	-0.123
ENSG00000283103.1	LLNLR-245B6.1	chr19	-	58325160	58325361	58314805	58315036	58326822	58326933	11,5	1,5	6,18	1,0	0.0225002	0.846,0.333	0.75,1.0	-0.285
ENSG00000283103.1	LLNLR-245B6.1	chr19	-	58325171	58325361	58314805	58315036	58326822	58326933	11,5	1,5	6,18	1,0	0.0225002	0.846,0.333	0.75,1.0	-0.285
ENSG00000283103.1	LLNLR-245B6.1	chr19	-	58325274	58325361	58314805	58315036	58326822	58326933	18,18	1,5	19,26	1,0	0.0243785	0.9,0.643	0.905,1.0	-0.181
ENSG00000283103.1	LLNLR-245B6.1	chr19	-	58325246	58325361	58314805	58315036	58326822	58326933	13,5	1,5	5,18	1,0	0.0294279	0.867,0.333	0.714,1.0	-0.257
ENSG00000105983.19	LMBR1	chr7	-	156834493	156834575	156833738	156833792	156836812	156836885	12,21	52,53	5,4	55,86	0.000519961	0.103,0.165	0.043,0.023	0.101
ENSG00000105983.19	LMBR1	chr7	-	156834477	156834575	156833752	156833792	156836812	156836885	22,37	52,53	9,22	55,86	0.0118083	0.175,0.259	0.076,0.113	0.122
ENSG00000139636.15	LMBR1L	chr12	-	49105923	49105957	49104745	49104885	49106960	49107045	3,7	6,14	16,10	2,0	5.44559e-06	0.254,0.254	0.845,1.0	-0.668
ENSG00000136153.19	LMO7	chr13	+	75713181	75713248	75636322	75636726	75727028	75727098	5,10	0,1	13,7	8,5	0.00207549	1.0,0.837	0.455,0.419	0.481
ENSG00000136153.19	LMO7	chr13	+	75713181	75713252	75636322	75636726	75727028	75727098	15,23	0,1	44,26	8,5	0.00457814	1.0,0.92	0.733,0.722	0.232
ENSG00000196365.11	LONP1	chr19	-	5708341	5708403	5707059	5707143	5711770	5712002	49,60	3,4	47,99	0,0	0.0141718	0.897,0.889	1.0,1.0	-0.107
ENSG00000102910.13	LONP2	chr16	+	48256609	48256741	48252130	48252365	48258617	48258740	94129	6,4	85152	15,17	0.0212609	0.887,0.942	0.739,0.817	0.136
ENSG00000101577.9	LPIN2	chr18	-	2928590	2928660	2927721	2927811	2929064	2929158	22,50	3,4	33,38	0,0	0.00750784	0.787,0.863	1.0,1.0	-0.175
ENSG00000145012.12	LPP	chr3	+	188335113	188335202	188225404	188225527	188406111	188406313	2,0	37,19	2,10	18,16	0.00478366	0.026,0.0	0.053,0.238	-0.132
ENSG00000145012.12	LPP	chr3	+	188406111	188406307	188225404	188225527	188484591	188484704	37,22	0,7	18,16	0,0	0.0139729	1.0,0.611	1.0,1.0	-0.195
ENSG00000145012.12	LPP	chr3	+	188225404	188225527	188153930	188154021	188406111	188406313	39,19	10,4	23,17	1,1	0.0337416	0.661,0.704	0.92,0.895	-0.225
ENSG00000110031.12	LPXN	chr11	-	58564154	58564201	58554840	58554940	58570555	58570713	14,16	10,4	3,9	1,0	0.0190126	0.458,0.707	0.644,1.0	-0.24
ENSG00000186001.12	LRCH3	chr3	+	197858833	197858905	197852560	197852620	197865422	197865471	2,6	7,6	12,32	1,4	0.000319491	0.125,0.333	0.857,0.8	-0.6
ENSG00000186001.12	LRCH3	chr3	+	197854391	197854445	197852560	197852620	197865422	197865471	16,21	7,6	43,44	1,4	0.00952137	0.565,0.666	0.961,0.862	-0.296
ENSG00000077454.15	LRCH4	chr7	-	100575704	100575782	100574010	100574356	100576237	100576323	8,9	5,0	8,12	0,0	0.0270086	0.444,1.0	1.0,1.0	-0.278
ENSG00000121931.15	LRIF1	chr1	-	110951287	110952815	110949850	110950123	110963620	110964079	47,90	29,32	88,77	2,20	0.023078	0.448,0.584	0.957,0.658	-0.291
ENSG00000157193.14	LRP8	chr1	-	53257239	53257464	53255116	53255185	53258318	53258471	26,25	0,0	72,18	5,2	0.0195622	1.0,1.0	0.878,0.818	0.152
ENSG00000079691.17	LRRC16A	chr6	+	25612739	25612886	25610121	25610181	25619446	25620530	10,8	37,20	6,2	50,38	0.0456793	0.119,0.167	0.057,0.026	0.102
ENSG00000010626.14	LRRC23	chr12	+	6909889	6910026	6907314	6907445	6913890	6914228	2,9	1,5	22,11	1,0	0.0011857	0.5,0.474	0.917,1.0	-0.472
ENSG00000010626.14	LRRC23	chr12	+	6912729	6913027	6909889	6910026	6913890	6914194	26,29	0,2	23,10	9,3	0.00150377	1.0,0.879	0.561,0.625	0.347
ENSG00000010626.14	LRRC23	chr12	+	6912831	6913027	6909889	6910026	6913890	6914243	15,17	0,2	20,6	9,3	0.00774283	1.0,0.81	0.526,0.5	0.392
ENSG00000010626.14	LRRC23	chr12	+	6912729	6913027	6907314	6907445	6913890	6914194	15,20	1,5	16,6	1,0	0.0466886	0.882,0.667	0.889,1.0	-0.17
ENSG00000254402.6	LRRC24	chr8	-	144526551	144526639	144524815	144525033	144526959	144527032	5,17	5,8	14,9	1,0	0.000609719	0.333,0.515	0.875,1.0	-0.513
ENSG00000148814.17	LRRC27	chr10	+	132342212	132342271	132337564	132337695	132344497	132344650	32,5	4,6	25,32	0,0	0.000267747	0.814,0.313	1.0,1.0	-0.436
ENSG00000168904.14	LRRC28	chr15	+	99363105	99363262	99360995	99361511	99386029	99386295	10,9	7,18	26,11	3,5	0.041317	0.417,0.2	0.813,0.524	-0.36
ENSG00000185158.12	LRRC37B	chr17	+	32045699	32045818	32035564	32035639	32047760	32048021	13,23	5,0	7,2	0,0	0.0359217	0.565,1.0	1.0,1.0	-0.218
ENSG00000116212.14	LRRC42	chr1	+	53947787	53947821	53946076	53946549	53951985	53952472	22,21	35,65	25,18	18,9	0.00401625	0.299,0.18	0.486,0.576	-0.291
ENSG00000163428.3	LRRC58	chr3	-	120335820	120335953	120334861	120335139	120348743	120349339	85107	1,0	95,47	0,8	0.0226415	0.977,1.0	1.0,0.746	0.115
ENSG00000133739.15	LRRCC1	chr8	+	85123412	85123606	85115374	85115584	85124791	85124939	31,39	2,8	69,42	0,2	0.00954181	0.886,0.709	1.0,0.913	-0.159
ENSG00000133739.15	LRRCC1	chr8	+	85123412	85123601	85115374	85115584	85124791	85124939	12,18	2,8	26,17	0,2	0.0187089	0.75,0.529	1.0,0.81	-0.266
ENSG00000093167.17	LRRFIP2	chr3	-	37091466	37091538	37083635	37083806	37094791	37094908	68,73	36,51	44,84	98104	0.000730347	0.486,0.417	0.183,0.288	0.216
ENSG00000161036.10	LRWD1	chr7	+	102467718	102467823	102467338	102467479	102468061	102468187	33,28	6,0	132104	0,2	0.0378539	0.733,1.0	1.0,0.963	-0.115
ENSG00000257103.8	LSM14A	chr19	+	34226407	34226464	34221349	34221738	34227364	34227617	24,33	55,68	60,60	60,76	0.0408553	0.195,0.212	0.357,0.305	-0.127
ENSG00000149657.19	LSM14B	chr20	+	62130218	62130296	62129808	62129952	62130529	62130691	417683	89,83	576546	29,45	0.00028612	0.701,0.804	0.909,0.858	-0.131
ENSG00000149657.19	LSM14B	chr20	+	62129784	62129952	62126339	62126439	62130218	62130296	133223	53,26	236222	13,11	0.00267836	0.556,0.811	0.901,0.91	-0.222
ENSG00000149657.19	LSM14B	chr20	+	62129808	62129952	62126339	62126439	62130218	62130296	64107	53,26	123133	13,11	0.00317931	0.376,0.673	0.826,0.858	-0.318
ENSG00000105699.16	LSR	chr19	+	35262545	35262692	35250314	35250659	35266358	35266532	62,52	6,2	98,50	0,0	0.0050327	0.838,0.929	1.0,1.0	-0.117
ENSG00000105699.16	LSR	chr19	+	35261924	35261981	35258944	35259064	35262545	35262723	8,14	30,27	39,18	29,22	0.0287412	0.129,0.224	0.428,0.313	-0.194
ENSG00000160285.14	LSS	chr21	-	46215179	46215298	46213737	46213835	46216388	46216524	69100	16,22	185131	3,4	3.08085e-08	0.683,0.694	0.969,0.942	-0.267
ENSG00000160285.14	LSS	chr21	-	46215684	46215793	46213737	46213835	46216388	46216524	95,53	16,22	132,92	3,4	3.0683e-05	0.748,0.546	0.957,0.92	-0.291
ENSG00000168056.14	LTBP3	chr11	-	65544063	65544099	65543426	65543549	65546441	65546564	0,0	19,15	1,5	7,12	0.0121621	0.0,0.0	0.087,0.217	-0.152
ENSG00000090006.17	LTBP4	chr19	+	40622949	40623021	40622400	40622667	40623603	40623732	39,25	26,10	44,26	6,1	0.00220077	0.429,0.556	0.786,0.929	-0.365
ENSG00000090006.17	LTBP4	chr19	+	40609745	40609871	40609529	40609661	40610531	40610657	6,4	0,0	22,13	1,4	0.0161544	1.0,1.0	0.917,0.619	0.232
ENSG00000111321.10	LTBR	chr12	+	6388397	6388505	6386346	6386444	6388799	6388825	285296	58,26	193221	9,14	0.0159273	0.711,0.851	0.915,0.888	-0.121
ENSG00000007392.16	LUC7L	chr16	-	228332	228402	227241	227336	229278	229450	39,47	13,10	25,27	36,24	0.000417486	0.602,0.703	0.259,0.362	0.342
ENSG00000108848.15	LUC7L3	chr17	+	50737286	50737479	50736959	50737026	50740305	50740345	80136	55,31	25,39	73,74	7.77734e-05	0.421,0.687	0.146,0.209	0.377
ENSG00000108848.15	LUC7L3	chr17	+	50738136	50738199	50737286	50737479	50740305	50740345	22,28	15,24	19,24	6,5	0.0473041	0.438,0.382	0.627,0.718	-0.262
ENSG00000108848.15	LUC7L3	chr17	+	50749218	50749344	50748343	50748416	50750500	50750847	33,13	0,0	24,40	2,3	0.0495289	1.0,1.0	0.857,0.87	0.137
ENSG00000169641.13	LUZP1	chr1	-	23109584	23109650	23109021	23109127	23168765	23168845	0,0	3,2	12,11	6,0	1.15448e-05	0.0,0.0	0.509,1.0	-0.754
ENSG00000160932.10	LY6E	chr8	+	143018832	143019119	143018527	143018586	143020887	143020991	0,0	5,5	5,2	19,5	0.0332863	0.0,0.0	0.116,0.167	-0.142
ENSG00000120992.17	LYPLA1	chr8	-	54052654	54052756	54051011	54051146	54055059	54055070	46,51	1,5	116152	0,0	0.0246669	0.958,0.836	1.0,1.0	-0.103
ENSG00000186687.15	LYRM7	chr5	+	131187027	131187109	131182228	131182299	131199530	131205426	13,19	0,0	27,57	7,5	0.0018593	1.0,1.0	0.659,0.851	0.245
ENSG00000127603.23	MACF1	chr1	+	39378460	39378523	39372478	39372596	39379202	39379444	79,50	12,5	90,46	5,0	0.0478172	0.777,0.841	0.905,1.0	-0.144
ENSG00000110514.19	MADD	chr11	+	47326737	47326807	47324470	47324577	47328657	47328704	68,62	25,10	129,91	5,13	0.0409257	0.578,0.757	0.929,0.779	-0.187
ENSG00000081026.18	MAGI3	chr1	+	113673321	113673465	113659079	113659265	113681197	113681336	37,15	0,8	30,31	1,0	0.0411191	1.0,0.484	0.938,1.0	-0.227
ENSG00000111196.9	MAGOHB	chr12	-	10612639	10612978	10610621	10610680	10613438	10613609	16,23	25,25	6,38	125140	2.36275e-05	0.242,0.315	0.023,0.119	0.207
ENSG00000111196.9	MAGOHB	chr12	-	10609097	10609383	10607853	10607936	10609830	10609941	22,17	13,20	22,22	81101	0.000306534	0.458,0.298	0.12,0.098	0.269
ENSG00000172175.12	MALT1	chr18	+	58710920	58710953	58709975	58710072	58714082	58714109	50,36	0,3	36,17	3,7	0.0468171	1.0,0.892	0.892,0.625	0.188
ENSG00000196547.14	MAN2A2	chr15	+	90913272	90913374	90912876	90912991	90913613	90913755	16,3	5,3	28,30	0,0	2.7867e-05	0.615,0.333	1.0,1.0	-0.526
ENSG00000196547.14	MAN2A2	chr15	+	90913272	90913406	90912876	90912991	90913613	90913755	50,25	5,3	58,74	0,0	0.00150377	0.833,0.806	1.0,1.0	-0.18
ENSG00000104774.12	MAN2B1	chr19	-	12658427	12658510	12658223	12658344	12661259	12661376	85,79	13,31	56113	3,12	0.0492617	0.766,0.56	0.903,0.825	-0.201
ENSG00000140400.14	MAN2C1	chr15	-	75363209	75363290	75362641	75362748	75364487	75364665	0,0	14,17	7,19	11,3	1.10446e-05	0.0,0.0	0.241,0.76	-0.5
ENSG00000140400.14	MAN2C1	chr15	-	75363209	75363263	75362641	75362748	75363998	75364188	0,0	26,23	8,20	68,42	0.000176071	0.0,0.0	0.063,0.213	-0.138
ENSG00000140400.14	MAN2C1	chr15	-	75363209	75363352	75362641	75362748	75363998	75364188	0,0	26,23	10,16	68,42	0.00026989	0.0,0.0	0.068,0.16	-0.114
ENSG00000140400.14	MAN2C1	chr15	-	75363998	75364188	75362641	75362748	75364487	75364665	59,94	14,17	141179	11,3	0.000408068	0.678,0.734	0.865,0.968	-0.211
ENSG00000185090.14	MANEAL	chr1	+	37796743	37796820	37795736	37795846	37799843	37801133	32,40	7,0	110,53	0,2	0.0495289	0.696,1.0	1.0,0.93	-0.117
ENSG00000065559.14	MAP2K4	chr17	+	12081355	12081530	12054888	12054991	12095574	12095694	323310	25,37	309221	10,5	0.000353408	0.866,0.807	0.939,0.957	-0.111
ENSG00000197442.9	MAP3K5	chr6	-	136650983	136651091	136642519	136642569	136656306	136656460	60,63	1,0	34,50	0,10	0.00833007	0.968,1.0	1.0,0.714	0.127
ENSG00000011566.14	MAP4K3	chr2	-	39307942	39308005	39299742	39299801	39309460	39309519	20,15	76,59	69,55	82110	0.00460382	0.122,0.119	0.309,0.21	-0.139
ENSG00000071054.16	MAP4K4	chr2	+	101871493	101871685	101870294	101870415	101873646	101873764	20,11	42,33	58,49	30,29	6.63577e-06	0.192,0.143	0.492,0.458	-0.307
ENSG00000116871.15	MAP7D1	chr1	+	36174897	36175008	36173363	36173478	36176198	36176581	5,7	13,5	22,25	6,3	0.00672019	0.161,0.412	0.647,0.806	-0.44
ENSG00000188130.13	MAPK12	chr22	-	50247695	50247776	50246874	50246966	50247889	50248145	2,2	9,5	15,13	9,1	0.00706811	0.1,0.167	0.455,0.867	-0.528
ENSG00000102882.11	MAPK3	chr16	-	30117136	30117285	30116893	30117003	30117669	30117700	379370	70,63	351380	27,31	0.000768016	0.73,0.746	0.867,0.86	-0.125
ENSG00000050748.17	MAPK9	chr5	-	180286974	180287067	180280439	180280608	180291847	180292053	11,14	40,24	40,14	17,12	0.0028945	0.121,0.226	0.541,0.368	-0.281
ENSG00000050748.17	MAPK9	chr5	-	180279795	180279887	180269279	180269409	180280439	180280608	102117	73,54	84,85	117,73	0.0473224	0.411,0.52	0.264,0.368	0.15
ENSG00000119487.16	MAPKAP1	chr9	-	125506309	125506417	125484442	125484583	125543058	125543168	104,97	78,96	349338	140124	4.25969e-05	0.4,0.336	0.555,0.577	-0.198
ENSG00000119487.16	MAPKAP1	chr9	-	125506309	125506417	125467971	125468109	125543058	125543168	51,44	11,5	146170	4,3	0.000584262	0.699,0.815	0.948,0.966	-0.2
ENSG00000186868.15	MAPT	chr17	+	46010309	46010402	45996398	45996664	46014242	46014324	43,48	20,14	22,3	28,14	0.00152872	0.518,0.632	0.282,0.097	0.385
ENSG00000186868.15	MAPT	chr17	+	45971858	45971945	45962337	45962470	45978374	45978440	34,22	17,33	39,41	12,5	0.0252058	0.5,0.25	0.619,0.804	-0.337
ENSG00000173926.5	MARCH3	chr5	-	126914929	126915134	126878184	126878394	126917983	126918227	9,11	0,0	9,12	5,0	0.0280996	1.0,1.0	0.474,1.0	0.263
ENSG00000136536.14	MARCH7	chr2	+	159764625	159764674	159762879	159762993	159767283	159767369	64,53	40,38	124195	47,16	0.00970883	0.487,0.453	0.61,0.878	-0.274
ENSG00000136536.14	MARCH7	chr2	+	159714556	159714598	159712488	159712606	159729008	159729175	0,0	7,4	4,1	2,10	0.0418076	0.0,0.0	0.558,0.059	-0.308
ENSG00000072518.20	MARK2	chr11	+	63908259	63908304	63904785	63905043	63908876	63909591	72,49	24,19	109152	4,6	7.04245e-09	0.648,0.613	0.944,0.94	-0.311
ENSG00000072518.20	MARK2	chr11	+	63890221	63890295	63888695	63888964	63895158	63895226	5,3	7,3	0,1	3,3	0.0278559	0.263,0.333	0.0,0.143	0.227
ENSG00000075413.17	MARK3	chr14	+	103451917	103451983	103428386	103428440	103462404	103462461	13,11	0,0	12,10	2,3	0.0058559	1.0,1.0	0.757,0.633	0.305
ENSG00000125952.18	MAX	chr14	-	65077562	65077643	65077339	65077428	65077912	65078036	1,14	1,16	0,1	2,9	0.00256276	0.333,0.304	0.0,0.053	0.292
ENSG00000125952.18	MAX	chr14	-	65101545	65101572	65093707	65093815	65102303	65102339	55,44	133,98	85,97	113115	0.0129776	0.232,0.247	0.354,0.381	-0.128
ENSG00000198125.12	MB	chr22	-	35620208	35620324	35617162	35617265	35623190	35623401	25,6	3,3	12,4	14,8	0.0260632	0.806,0.5	0.3,0.2	0.403
ENSG00000141644.17	MBD1	chr18	-	50274185	50274350	50273563	50273863	50274976	50275045	3,2	15,8	11,16	8,8	0.00154406	0.091,0.111	0.407,0.5	-0.353
ENSG00000141644.17	MBD1	chr18	-	50274185	50274353	50273563	50273863	50274976	50275045	7,6	15,8	18,27	8,8	0.00600171	0.189,0.273	0.529,0.628	-0.348
ENSG00000166987.14	MBD6	chr12	+	57526565	57527227	57525347	57526388	57527506	57527660	35,41	0,7	25,35	0,0	0.0126855	1.0,0.745	1.0,1.0	-0.127
ENSG00000152601.17	MBNL1	chr3	+	152455541	152455577	152447724	152447773	152456266	152456361	25,40	51,56	106,96	42,28	6.95203e-09	0.246,0.323	0.627,0.696	-0.377
ENSG00000152601.17	MBNL1	chr3	+	152446703	152446757	152445281	152445539	152447619	152447773	235295	31,3	223234	36,56	0.00094758	0.812,0.982	0.779,0.704	0.155
ENSG00000152601.17	MBNL1	chr3	+	152455541	152455577	152447724	152447773	152459270	152459345	18,24	33,30	58,49	34,32	0.0170145	0.267,0.348	0.532,0.505	-0.211
ENSG00000011258.15	MBTD1	chr17	-	51202021	51202077	51201591	51201696	51202700	51202935	414275	27,32	306292	6,1	2.12805e-07	0.896,0.828	0.966,0.994	-0.118
ENSG00000078070.11	MCCC1	chr3	-	183092408	183092545	183086692	183086788	183094558	183094605	74,79	14,18	151202	4,17	0.00198768	0.725,0.687	0.95,0.856	-0.197
ENSG00000131844.15	MCCC2	chr5	+	71592925	71592992	71587287	71587554	71596279	71596364	711562	44,57	499469	3,10	4.04643e-09	0.893,0.835	0.988,0.96	-0.11
ENSG00000125885.13	MCM8	chr20	+	5972006	5972037	5967829	5968025	5977875	5978017	5,2	0,0	25,17	6,0	0.018209	1.0,1.0	0.745,1.0	0.127
ENSG00000111877.17	MCM9	chr6	-	118932606	118932740	118931489	118931738	118934890	118935024	7,9	12,9	47,40	5,2	5.80782e-07	0.226,0.333	0.825,0.909	-0.587
ENSG00000111877.17	MCM9	chr6	-	118932606	118932749	118931489	118931738	118934890	118935114	6,4	12,9	28,23	5,2	4.71946e-06	0.2,0.182	0.737,0.852	-0.603
ENSG00000111877.17	MCM9	chr6	-	118856370	118856545	118829047	118829250	118894026	118894356	26,16	0,1	23,15	5,1	0.0284163	1.0,0.889	0.697,0.882	0.155
ENSG00000055732.12	MCOLN3	chr1	-	85041009	85041177	85034097	85034251	85045132	85045362	6,8	5,0	22,10	0,0	0.0308783	0.375,1.0	1.0,1.0	-0.313
ENSG00000137337.14	MDC1	chr6	-	30711411	30711504	30707383	30707454	30711666	30711726	6,14	0,0	20,13	7,0	0.0087745	1.0,1.0	0.588,1.0	0.206
ENSG00000111554.14	MDM1	chr12	-	68316077	68316253	68314947	68315265	68321346	68321446	7,8	8,0	74,65	0,0	0.0149874	0.304,1.0	1.0,1.0	-0.348
ENSG00000111554.14	MDM1	chr12	-	68296922	68296982	68294567	68295366	68302619	68302872	6,4	0,0	61,36	1,9	0.016285	1.0,1.0	0.971,0.685	0.172
ENSG00000198625.12	MDM4	chr1	+	204537458	204537497	204532190	204532246	204538208	204538308	34,10	124104	70107	35,45	0	0.151,0.059	0.565,0.606	-0.48
ENSG00000198625.12	MDM4	chr1	+	204537429	204537497	204532190	204532246	204538208	204538308	69,21	124104	148176	35,45	0	0.221,0.094	0.684,0.666	-0.518
ENSG00000112159.11	MDN1	chr6	-	89776599	89776695	89774620	89774733	89781398	89781592	24,17	0,6	16,33	0,0	0.0169125	1.0,0.586	1.0,1.0	-0.207
ENSG00000112159.11	MDN1	chr6	-	89683830	89683904	89683131	89683330	89685826	89685973	23,21	2,3	40,32	0,0	0.0199475	0.852,0.778	1.0,1.0	-0.185
ENSG00000169057.19	MECP2	chrX	-	154092183	154092307	154032458	154032557	154097603	154097663	63,80	36,47	80111	15,14	1.17653e-05	0.467,0.46	0.727,0.799	-0.299
ENSG00000144893.12	MED12L	chr3	+	151192549	151192654	151190716	151190931	151193489	151193745	0,0	12,8	20,4	9,8	3.09348e-05	0.0,0.0	0.526,0.2	-0.363
ENSG00000175221.14	MED16	chr19	-	889637	889807	885769	886201	890136	890244	25,31	6,2	59,52	0,0	0.00071976	0.676,0.886	1.0,1.0	-0.219
ENSG00000112282.17	MED23	chr6	-	131615323	131615341	131610045	131610246	131615906	131616002	0,0	12,18	3,3	7,17	0.0129776	0.0,0.0	0.256,0.124	-0.19
ENSG00000162591.15	MEGF6	chr1	-	3499137	3499266	3498370	3498499	3499587	3499716	1,0	2,5	16,10	2,3	6.01061e-05	0.2,0.0	0.8,0.625	-0.613
ENSG00000162591.15	MEGF6	chr1	-	3493770	3493899	3492638	3492767	3493995	3494124	10,6	0,0	27,26	0,6	0.0176584	1.0,1.0	1.0,0.684	0.158
ENSG00000143995.19	MEIS1	chr2	+	66569049	66569145	66568666	66568756	66571245	66573869	20,9	39,23	60,42	38,44	0.0154818	0.204,0.164	0.441,0.323	-0.198
ENSG00000134138.19	MEIS2	chr15	-	36894716	36894812	36891255	36892459	36895150	36895261	2,18	10,19	15,27	6,8	0.0145025	0.091,0.321	0.556,0.628	-0.386
ENSG00000165304.7	MELK	chr9	+	36657240	36657363	36651745	36651877	36665349	36665581	73,67	12,4	186101	49,40	0.0190126	0.753,0.893	0.655,0.558	0.216
ENSG00000162959.13	MEMO1	chr2	-	31883385	31883462	31869847	31869952	31891991	31892134	244168	26,30	250191	0,13	0.000105733	0.824,0.737	1.0,0.88	-0.159
ENSG00000162959.13	MEMO1	chr2	-	31883385	31883462	31869847	31869952	31917925	31918037	60,33	16,9	53,56	2,4	0.00308348	0.652,0.647	0.93,0.875	-0.253
ENSG00000162959.13	MEMO1	chr2	-	31891991	31892134	31869850	31869952	31917925	31918037	65,69	16,9	72,73	2,4	0.00728374	0.67,0.793	0.947,0.901	-0.192
ENSG00000010165.19	METTL13	chr1	+	171790451	171790616	171787734	171787930	171792016	171792235	87,91	5,9	209185	2,0	0.000115849	0.897,0.835	0.981,1.0	-0.124
ENSG00000067365.14	METTL22	chr16	+	8635167	8635312	8628729	8629110	8639090	8639162	35,35	5,1	28,30	0,0	0.0154341	0.778,0.946	1.0,1.0	-0.138
ENSG00000127720.7	METTL25	chr12	+	82438717	82438791	82434694	82434724	82456726	82456820	15,5	5,3	31,26	1,0	0.000280624	0.6,0.455	0.939,1.0	-0.442
ENSG00000138382.13	METTL5	chr2	-	169815476	169815528	169812456	169812506	169819560	169819643	112129	48,66	202212	9,19	0	0.574,0.531	0.928,0.866	-0.345
ENSG00000206562.11	METTL6	chr3	-	15414729	15414914	15414020	15414162	15415771	15415860	5,3	20,5	1,0	36,33	0.00488745	0.111,0.231	0.014,0.0	0.164
ENSG00000168958.19	MFF	chr2	+	227328657	227328789	227325270	227325427	227330625	227330846	59,71	12,12	44,35	30,15	0.00844894	0.711,0.747	0.423,0.538	0.248
ENSG00000168958.19	MFF	chr2	+	227347225	227347384	227340291	227340380	227355676	227355761	71,81	83117	58,19	96111	0.0260233	0.3,0.257	0.232,0.079	0.123
ENSG00000168958.19	MFF	chr2	+	227328677	227328789	227325233	227325427	227330625	227330846	143169	12,12	165,89	30,15	0.0323469	0.856,0.876	0.733,0.748	0.126
ENSG00000168958.19	MFF	chr2	+	227342744	227342819	227340291	227340380	227347225	227347380	20,8	65,71	23,17	56,17	0.0336939	0.133,0.053	0.17,0.333	-0.159
ENSG00000168958.19	MFF	chr2	+	227347225	227347380	227340291	227340380	227355676	227355761	67,71	83117	56,17	96111	0.0410048	0.288,0.233	0.226,0.071	0.112
ENSG00000147324.10	MFHAS1	chr8	-	8790323	8790434	8786024	8786055	8797364	8797491	0,1	9,12	5,5	7,13	0.0055032	0.0,0.04	0.263,0.161	-0.192
ENSG00000092931.11	MFSD11	chr17	+	76744574	76744637	76744321	76744466	76754046	76754087	16,17	57,33	9,7	67,62	0.0192496	0.13,0.215	0.066,0.056	0.111
ENSG00000092931.11	MFSD11	chr17	+	76743397	76743456	76742176	76742273	76744321	76744466	45,25	6,5	60,69	0,4	0.0295697	0.804,0.732	1.0,0.904	-0.184
ENSG00000164073.9	MFSD8	chr4	-	127942044	127942158	127932984	127933093	127943751	127943992	24,12	3,3	14,7	0,0	0.00269439	0.8,0.667	1.0,1.0	-0.266
ENSG00000164073.9	MFSD8	chr4	-	127938782	127938838	127932984	127933093	127943751	127943992	24,18	3,3	40,39	0,0	0.00525303	0.818,0.771	1.0,1.0	-0.206
ENSG00000197530.12	MIB2	chr1	+	1625527	1625653	1625285	1625428	1626649	1626754	23,17	7,1	2,4	0,0	0.00308348	0.622,0.895	1.0,1.0	-0.242
ENSG00000197530.12	MIB2	chr1	+	1625557	1625653	1625285	1625428	1626649	1626754	23,19	7,1	2,7	0,0	0.00339168	0.622,0.905	1.0,1.0	-0.236
ENSG00000197530.12	MIB2	chr1	+	1625545	1625653	1625285	1625428	1626649	1626754	57,70	7,1	30,34	0,0	0.0162863	0.803,0.972	1.0,1.0	-0.113
ENSG00000164877.18	MICALL2	chr7	-	1435100	1435147	1434365	1434672	1436741	1436856	38,33	6,7	87,55	0,0	6.71007e-06	0.793,0.74	1.0,1.0	-0.234
ENSG00000164877.18	MICALL2	chr7	-	1437889	1437980	1437535	1437608	1438096	1438220	63,75	7,6	94,75	0,0	0.000125415	0.818,0.862	1.0,1.0	-0.16
ENSG00000164877.18	MICALL2	chr7	-	1434209	1435147	1428618	1428791	1436741	1436856	29,32	8,11	65,31	1,2	0.000206808	0.644,0.593	0.97,0.886	-0.309
ENSG00000165487.13	MICU2	chr13	-	21502925	21503097	21492699	21493353	21510003	21510101	18,8	5,0	29,34	1,0	0.0486543	0.643,1.0	0.935,1.0	-0.146
ENSG00000105556.10	MIER2	chr19	-	330263	330380	327863	327989	334399	334542	2,9	12,13	0,0	8,9	0.00286107	0.077,0.257	0.0,0.0	0.167
ENSG00000129534.13	MIS18BP1	chr14	-	45235813	45235942	45231140	45231298	45237647	45237721	8,4	15,1	0,0	3,1	0.00229525	0.211,0.667	0.0,0.0	0.439
ENSG00000196588.14	MKL1	chr22	-	40594673	40594735	40552105	40552367	40636477	40636685	14,11	3,4	15,12	0,0	0.0006507	0.714,0.595	1.0,1.0	-0.346
ENSG00000079277.19	MKNK1	chr1	-	46560233	46560277	46557417	46558800	46561477	46561642	8,14	44,28	31,31	10,8	1.71726e-08	0.101,0.236	0.658,0.706	-0.513
ENSG00000099875.14	MKNK2	chr19	-	2046521	2046691	2046460	2046468	2050800	2050947	54,68	7,2	14,20	0,0	0.0144904	0.794,0.944	1.0,1.0	-0.131
ENSG00000011143.16	MKS1	chr17	-	58214258	58214387	58213858	58213869	58216087	58216243	23,20	0,0	73,56	0,7	0.0344918	1.0,1.0	1.0,0.8	0.1
ENSG00000078403.16	MLLT10	chr10	+	21590123	21590267	21586293	21586348	21595330	21595440	5,5	13,13	0,1	20,19	0.00323963	0.161,0.161	0.0,0.026	0.148
ENSG00000171843.15	MLLT3	chr9	-	20354807	20354879	20345076	20346574	20360741	20360841	182242	7,32	97,87	3,0	0.00383779	0.929,0.791	0.942,1.0	-0.111
ENSG00000275023.4	MLLT6	chr17	+	38721877	38722227	38720658	38720747	38722677	38722768	48,42	11,6	40,41	0,2	0.00218922	0.686,0.778	1.0,0.911	-0.224
ENSG00000115648.13	MLPH	chr2	+	237545456	237545639	237542566	237542659	237546605	237546683	11501433	240142	450618	619695	0	0.706,0.835	0.267,0.308	0.483
ENSG00000115648.13	MLPH	chr2	+	237545456	237545645	237542566	237542659	237546605	237546844	11611439	240142	463638	619695	0	0.707,0.835	0.272,0.315	0.477
ENSG00000115648.13	MLPH	chr2	+	237545456	237545596	237542566	237542659	237546605	237546844	11541433	240142	449618	619695	0	0.706,0.835	0.266,0.308	0.483
ENSG00000139428.11	MMAB	chr12	-	109561242	109561329	109561039	109561104	109561419	109561517	33,29	33,48	16,4	82,44	1.72047e-05	0.333,0.232	0.089,0.043	0.217
ENSG00000155229.20	MMS19	chr10	-	97469088	97469104	97468251	97468406	97469645	97469723	28,39	3,10	27,29	2,0	0.0197363	0.885,0.763	0.917,1.0	-0.134
ENSG00000155229.20	MMS19	chr10	-	97484102	97484151	97480941	97481042	97498272	97498429	39,53	5,4	55,49	2,0	0.0496815	0.822,0.887	0.942,1.0	-0.116
ENSG00000123562.16	MORF4L2	chrX	-	103684680	103684729	103678500	103678651	103685170	103685260	254109	212172	286270	147124	0.00127925	0.415,0.273	0.536,0.564	-0.206
ENSG00000129255.14	MPDU1	chr17	+	7586898	7587017	7586691	7586777	7587160	7587181	104138	7,6	238226	42,40	0.000921473	0.881,0.92	0.739,0.739	0.162
ENSG00000107186.16	MPDZ	chr9	-	13147547	13147658	13139986	13140149	13150510	13150688	3,2	20,7	15,12	13,8	0.00173347	0.07,0.125	0.366,0.429	-0.3
ENSG00000051825.14	MPHOSPH9	chr12	-	123162114	123162218	123161135	123161383	123163949	123163961	95,64	12,6	116157	3,1	0.000498601	0.798,0.842	0.951,0.987	-0.149
ENSG00000051825.14	MPHOSPH9	chr12	-	123163013	123163134	123161135	123161383	123163949	123164090	74,62	12,6	99131	3,1	0.000663981	0.755,0.838	0.943,0.985	-0.167
ENSG00000153029.14	MR1	chr1	+	181053572	181053677	181050010	181050286	181055224	181061938	91,56	8,6	98144	0,0	2.18904e-05	0.85,0.824	1.0,1.0	-0.163
ENSG00000037757.13	MRI1	chr19	+	13765953	13766129	13764870	13765109	13768358	13768557	143126	4,8	166125	24,16	0.00813721	0.947,0.887	0.776,0.796	0.131
ENSG00000037757.13	MRI1	chr19	+	13765953	13766065	13764870	13765109	13768358	13768680	98,92	4,8	146,99	24,16	0.0374619	0.925,0.852	0.753,0.756	0.134
ENSG00000179832.17	MROH1	chr8	+	144160969	144161089	144148016	144148076	144163770	144163848	28,33	0,0	54,23	4,2	0.0266371	1.0,1.0	0.871,0.852	0.139
ENSG00000082515.16	MRPL22	chr5	+	154950802	154950938	154941216	154941265	154956370	154956436	62,53	15,12	178160	2,1	1.35699e-10	0.674,0.688	0.978,0.988	-0.302
ENSG00000082515.16	MRPL22	chr5	+	154950820	154950938	154941216	154941265	154956370	154956436	81,68	15,12	208190	2,1	4.77195e-10	0.73,0.739	0.981,0.99	-0.251
ENSG00000162910.18	MRPL55	chr1	-	228108436	228108474	228108234	228108318	228109148	228109306	11,14	15,12	1,10	49,17	0.0173334	0.324,0.433	0.013,0.278	0.233
ENSG00000163319.10	MRPS18C	chr4	+	83458345	83458429	83456908	83456958	83459739	83459797	75,55	30,62	236213	44,50	0.00914141	0.556,0.307	0.728,0.681	-0.273
ENSG00000147586.9	MRPS28	chr8	-	80028694	80028796	80002998	80003180	80030053	80030232	11,15	1,1	9,9	13,8	0.000212904	0.846,0.882	0.257,0.36	0.555
ENSG00000148187.17	MRRF	chr9	+	122285779	122285946	122285168	122285287	122286038	122286166	39,71	4,3	33,26	0,0	0.0215973	0.83,0.922	1.0,1.0	-0.124
ENSG00000153944.10	MSI2	chr17	+	57676986	57677059	57674971	57675126	57679548	57684685	200,81	64,39	269203	21,3	3.90365e-11	0.61,0.509	0.865,0.971	-0.358
ENSG00000156469.8	MTERF3	chr8	-	96246268	96246454	96245859	96245931	96250905	96251095	10,22	5,1	43,28	0,1	0.0123647	0.5,0.917	1.0,0.933	-0.258
ENSG00000156469.8	MTERF3	chr8	-	96260136	96260247	96258487	96258700	96261500	96261588	1,0	5,8	2,5	11,7	0.0499447	0.091,0.0	0.083,0.263	-0.128
ENSG00000122085.16	MTERF4	chr2	-	241097242	241097427	241094276	241094432	241099395	241099894	48,51	0,0	41,66	5,4	0.00251856	1.0,1.0	0.804,0.892	0.152
ENSG00000122085.16	MTERF4	chr2	-	241089979	241090044	241089224	241089365	241094276	241094432	28,45	6,1	35,33	0,0	0.00782945	0.709,0.959	1.0,1.0	-0.166
ENSG00000143033.17	MTF2	chr1	+	93120548	93120672	93119332	93119401	93133702	93133740	31,12	0,7	14,14	0,0	0.0211537	1.0,0.462	1.0,1.0	-0.269
ENSG00000103248.18	MTHFSD	chr16	-	86548034	86548111	86546558	86546649	86548463	86548577	6,4	17,10	28,21	8,14	0.00295257	0.15,0.167	0.636,0.429	-0.374
ENSG00000063601.16	MTMR1	chrX	+	150750791	150750843	150744360	150744453	150755688	150755865	19,12	0,1	7,16	1,5	0.0175493	1.0,0.874	0.802,0.649	0.212
ENSG00000014914.19	MTMR11	chr1	-	149935583	149935620	149935298	149935359	149936153	149936350	17,20	1,2	8,6	7,2	0.0268209	0.918,0.868	0.43,0.665	0.346
ENSG00000014914.19	MTMR11	chr1	-	149931259	149931426	149930791	149930965	149931943	149932014	4,5	5,8	12,7	4,0	0.0359523	0.286,0.238	0.6,1.0	-0.538
ENSG00000150712.10	MTMR12	chr5	-	32234961	32235129	32226993	32230347	32239000	32239171	55,36	3,3	41,34	0,0	0.0334608	0.902,0.857	1.0,1.0	-0.121
ENSG00000163719.18	MTMR14	chr3	+	9697710	9697866	9688943	9689082	9701789	9702216	8,8	0,1	20,8	2,10	0.0193347	1.0,0.8	0.833,0.286	0.341
ENSG00000087053.18	MTMR2	chr11	-	95887611	95887684	95865439	95865676	95888155	95888261	0,2	11,7	7,7	9,9	0.00881452	0.0,0.125	0.28,0.28	-0.218
ENSG00000108389.9	MTMR4	chr17	-	58514991	58515083	58512851	58512941	58516579	58516618	0,0	2,15	10,0	18,16	0.0150371	0.0,0.0	0.217,0.0	-0.108
ENSG00000120662.15	MTRF1	chr13	-	41257672	41257796	41254528	41254620	41260492	41260915	17,17	42,46	5,4	50,38	0.00604574	0.168,0.156	0.048,0.05	0.113
ENSG00000120662.15	MTRF1	chr13	-	41257672	41257797	41254528	41254620	41260492	41260915	17,12	42,46	3,4	50,38	0.00618361	0.168,0.115	0.029,0.05	0.102
ENSG00000120662.15	MTRF1	chr13	-	41226999	41227245	41226431	41226568	41233889	41234007	5,7	23,16	1,1	25,12	0.0227517	0.098,0.179	0.02,0.04	0.109
ENSG00000120662.15	MTRF1	chr13	-	41262047	41262331	41260492	41260915	41263484	41263569	11,12	1,2	7,2	3,7	0.0340365	0.846,0.75	0.538,0.125	0.467
ENSG00000129422.14	MTUS1	chr8	-	17723671	17723833	17715766	17715901	17743603	17743799	39,28	19,8	20,43	1,2	0.0006507	0.506,0.636	0.909,0.915	-0.341
ENSG00000173171.14	MTX1	chr1	+	155212129	155212219	155210547	155210627	155212384	155212567	31,35	10,14	93114	7,14	0.00534395	0.608,0.556	0.869,0.803	-0.254
ENSG00000173171.14	MTX1	chr1	+	155212078	155212219	155210547	155210627	155212384	155212567	31,37	10,14	94114	7,14	0.00658579	0.608,0.569	0.87,0.803	-0.248
ENSG00000173171.14	MTX1	chr1	+	155212126	155212219	155210547	155210627	155212384	155212567	65,64	10,14	153180	7,14	0.0207	0.765,0.696	0.916,0.865	-0.16
ENSG00000177034.14	MTX3	chr5	-	79985570	79985659	79979760	79983794	79986949	79987107	10,17	72117	107,38	55,88	0.000408356	0.065,0.068	0.493,0.178	-0.269
ENSG00000185499.16	MUC1	chr1	-	155187721	155187858	155187454	155187576	155188162	155188212	11,21	2,3	7,11	0,0	0.0190126	0.733,0.778	1.0,1.0	-0.244
ENSG00000185499.16	MUC1	chr1	-	155188007	155188063	155187454	155187576	155188162	155188987	26,23	2,3	22,24	0,0	0.0370315	0.879,0.811	1.0,1.0	-0.155
ENSG00000110921.11	MVK	chr12	+	109579801	109579946	109575997	109576145	109586021	109586125	14,23	11,2	49,24	1,2	0.045348	0.389,0.852	0.961,0.857	-0.288
ENSG00000013364.18	MVP	chr16	+	29834315	29834437	29833934	29834066	29835703	29835798	14,24	44,64	2,12	78,73	0.00152529	0.137,0.158	0.013,0.076	0.103
ENSG00000005810.17	MYCBP2	chr13	-	77118339	77118519	77098814	77099013	77121372	77121495	0,4	22,22	13,6	25,18	0.0153396	0.0,0.083	0.206,0.143	-0.133
ENSG00000092841.18	MYL6	chr12	+	56160625	56160670	56160247	56160320	56161386	56161550	149297	12871754	555526	14981471	1.92082e-12	0.066,0.094	0.185,0.18	-0.102
[truncated: 1,343 more rows]

## Sheet: A549_MXE
GENCODE_GeneID	geneSymbol	chr	strand	X1stExonStart_0base	X1stExonEnd	X2ndExonStart_0base	X2ndExonEnd	upstreamES	upstreamEE	downstreamES	downstreamEE	IJC_SAMPLE_1	SJC_SAMPLE_1	IJC_SAMPLE_2	SJC_SAMPLE_2	FDR	IncLevel1	IncLevel2	A549.IncLevelDifference
[truncated: 317 more rows]

[truncated: 12 more sheets: MCF-7_MXE, A549_A5SS, MCF-7_A5SS, A549_A3SS, MCF-7_A3SS, A549_RI, MCF-7_RI, both_CE, both_MXE, both_A5SS, both_A3SS, both_RI]
