# Supplementary material
Source: HighWire-hosted journal article supplement (doi:10.1101/rna.073353.119)
Supplement: Supplemental_Tab_S7.xlsx [file Supplemental_Tab_S7.xlsx]

## Sheet: Legend
Supplementary Table 7. Differentially expressed genes (DEGs) after MBNL2 knockdown and their comparison to hypoxia-regulated genes.
Genes were filtered for an absolute fold change > 1.5 (given as log2-transformed fold change, ‘log2FoldChange’) and an adjusted P value < 0.05 (‘padj’) from DESeq2.
‘baseMean’ refers to the mean read count after library size correction, and ‘maxTPM’ gives the maximum expression level in transcript per million (TPM) in any sample.
Information is given for (i) 4,370 DEGs upon MBNL2 knockdown in hypoxic MCF-7 cells (black), (ii) 1,528 DEGs that are shared between MBNL2 knockdown and the hypoxia response in MCF-7 cells (red)
and (iii) 315 DEGs that are shared between MBNL2 knockdown and the hypoxia response in MCF-7 and A549 cells (purple).

## Sheet: siMBNL2_DEGs
GENCODE_gene_id	gene_name	gene_type	baseMean	log2FoldChange	pvalue	padj	maxTPM	description
ENSG00000001630.15	CYP51A1	protein_coding	450.328	-1.03627	6.63043e-05	0.000709306	9.40763	cytochrome P450 family 51 subfamily A member 1 [Source:HGNC Symbol;Acc:HGNC:2649]
ENSG00000002330.13	BAD	protein_coding	2646.33	-0.74561	0.000176151	0.00153367	110.52	BCL2 associated agonist of cell death [Source:HGNC Symbol;Acc:HGNC:936]
ENSG00000002919.14	SNX11	protein_coding	2707.6	-0.775555	4.39524e-05	0.000514985	56.2587	sorting nexin 11 [Source:HGNC Symbol;Acc:HGNC:14975]
ENSG00000004139.13	SARM1	protein_coding	854.09	1.09552	0.000157787	0.00140678	9.34119	sterile alpha and TIR motif containing 1 [Source:HGNC Symbol;Acc:HGNC:17074]
ENSG00000004399.12	PLXND1	protein_coding	9608.8	0.852724	2.61709e-05	0.000340008	118.06	plexin D1 [Source:HGNC Symbol;Acc:HGNC:9107]
ENSG00000004455.16	AK2	protein_coding	8991.28	-1.03224	1.21168e-07	4.35006e-06	123.45	adenylate kinase 2 [Source:HGNC Symbol;Acc:HGNC:362]
ENSG00000004838.13	ZMYND10	protein_coding	155.96	-1.10122	0.000950777	0.00564449	3.66417	zinc finger MYND-type containing 10 [Source:HGNC Symbol;Acc:HGNC:19412]
ENSG00000005001.9	PRSS22	protein_coding	1013.33	-1.18853	1.73163e-08	8.99211e-07	34.4483	serine protease 22 [Source:HGNC Symbol;Acc:HGNC:14368]
ENSG00000005007.12	UPF1	protein_coding	12178.1	-1.00804	2.58492e-07	8.21524e-06	110.623	UPF1, RNA helicase and ATPase [Source:HGNC Symbol;Acc:HGNC:9962]
ENSG00000005022.5	SLC25A5	protein_coding	13453.8	-0.997724	1.49107e-05	0.000217527	779.354	solute carrier family 25 member 5 [Source:HGNC Symbol;Acc:HGNC:10991]
ENSG00000005075.15	POLR2J	protein_coding	3411.14	-0.704728	0.0011486	0.00659235	277.76	RNA polymerase II subunit J [Source:HGNC Symbol;Acc:HGNC:9197]
ENSG00000005194.14	CIAPIN1	protein_coding	912.999	-0.760114	0.000323754	0.00245282	18.7051	cytokine induced apoptosis inhibitor 1 [Source:HGNC Symbol;Acc:HGNC:28050]
ENSG00000005243.9	COPZ2	protein_coding	204.973	1.56545	1.98394e-08	9.89021e-07	13.8154	coatomer protein complex subunit zeta 2 [Source:HGNC Symbol;Acc:HGNC:19356]
ENSG00000005448.16	WDR54	protein_coding	6081.64	-0.615652	0.00716541	0.0268634	165.901	WD repeat domain 54 [Source:HGNC Symbol;Acc:HGNC:25770]
ENSG00000005801.16	ZNF195	protein_coding	882.967	0.980276	1.44801e-05	0.000213205	17.8534	zinc finger protein 195 [Source:HGNC Symbol;Acc:HGNC:12986]
ENSG00000005812.10	FBXL3	protein_coding	2020.33	-0.592846	0.0056208	0.0224164	20.7611	F-box and leucine rich repeat protein 3 [Source:HGNC Symbol;Acc:HGNC:13599]
ENSG00000005882.11	PDK2	protein_coding	1667.6	0.649893	0.00250209	0.0120365	29.3325	pyruvate dehydrogenase kinase 2 [Source:HGNC Symbol;Acc:HGNC:8810]
ENSG00000006016.10	CRLF1	protein_coding	1699.51	-0.687082	0.00162448	0.00863617	42.3681	cytokine receptor like factor 1 [Source:HGNC Symbol;Acc:HGNC:2364]
ENSG00000006062.13	MAP3K14	protein_coding	1264.91	-0.905248	5.57084e-06	9.92849e-05	17.7188	mitogen-activated protein kinase kinase kinase 14 [Source:HGNC Symbol;Acc:HGNC:6853]
ENSG00000006194.9	ZNF263	protein_coding	5479.77	-0.831309	0.000606423	0.00399882	67.0789	zinc finger protein 263 [Source:HGNC Symbol;Acc:HGNC:13056]
ENSG00000006327.13	TNFRSF12A	protein_coding	3160.38	-0.606585	0.00205882	0.0103523	117.681	TNF receptor superfamily member 12A [Source:HGNC Symbol;Acc:HGNC:18152]
ENSG00000006634.7	DBF4	protein_coding	3096.91	-1.0894	3.78933e-08	1.69529e-06	52.8483	DBF4 zinc finger [Source:HGNC Symbol;Acc:HGNC:17364]
ENSG00000006756.15	ARSD	protein_coding	3490.42	0.950298	1.19315e-05	0.000182454	58.5013	arylsulfatase D [Source:HGNC Symbol;Acc:HGNC:717]
ENSG00000006757.11	PNPLA4	protein_coding	142.613	0.762016	0.0126773	0.0418079	4.70812	patatin like phospholipase domain containing 4 [Source:HGNC Symbol;Acc:HGNC:24887]
ENSG00000007080.10	CCDC124	protein_coding	1924.24	-0.665925	0.0017004	0.00895707	84.4294	coiled-coil domain containing 124 [Source:HGNC Symbol;Acc:HGNC:25171]
ENSG00000007376.7	RPUSD1	protein_coding	1056.66	1.06497	5.26361e-06	9.54672e-05	43.4737	RNA pseudouridine synthase domain containing 1 [Source:HGNC Symbol;Acc:HGNC:14173]
ENSG00000007944.14	MYLIP	protein_coding	5102.08	-0.754694	0.000274228	0.00214754	126.828	myosin regulatory light chain interacting protein [Source:HGNC Symbol;Acc:HGNC:21155]
ENSG00000008130.15	NADK	protein_coding	4151.61	-0.680317	0.000341693	0.00255107	52.5092	NAD kinase [Source:HGNC Symbol;Acc:HGNC:29831]
ENSG00000008226.19	DLEC1	protein_coding	98.5863	1.80018	2.3338e-06	4.91241e-05	1.69903	DLEC1, cilia and flagella associated protein [Source:HGNC Symbol;Acc:HGNC:2899]
ENSG00000008277.14	ADAM22	protein_coding	607.287	1.29445	6.51463e-07	1.75956e-05	6.28879	ADAM metallopeptidase domain 22 [Source:HGNC Symbol;Acc:HGNC:201]
ENSG00000008294.20	SPAG9	protein_coding	23883.4	-0.783686	0.000132483	0.00123519	148.989	sperm associated antigen 9 [Source:HGNC Symbol;Acc:HGNC:14524]
ENSG00000008311.14	AASS	protein_coding	82.6052	1.18889	0.0012128	0.00687171	2.51604	aminoadipate-semialdehyde synthase [Source:HGNC Symbol;Acc:HGNC:17366]
ENSG00000008324.10	SS18L2	protein_coding	478.909	-0.668789	0.0100803	0.035036	29.116	SS18 like 2 [Source:HGNC Symbol;Acc:HGNC:15593]
ENSG00000008441.16	NFIX	protein_coding	107.773	0.916132	0.00595735	0.0233912	1.80988	nuclear factor I X [Source:HGNC Symbol;Acc:HGNC:7788]
ENSG00000008710.17	PKD1	protein_coding	15920.4	-0.788053	1.6505e-05	0.000237607	63.1752	polycystin 1, transient receptor potential channel interacting [Source:HGNC Symbol;Acc:HGNC:9008]
ENSG00000008735.13	MAPK8IP2	protein_coding	64.4518	1.13077	0.0034699	0.0155278	1.32961	mitogen-activated protein kinase 8 interacting protein 2 [Source:HGNC Symbol;Acc:HGNC:6883]
ENSG00000008838.17	MED24	protein_coding	2539.27	-0.861843	4.57319e-05	0.000528081	28.5231	mediator complex subunit 24 [Source:HGNC Symbol;Acc:HGNC:22963]
ENSG00000008853.16	RHOBTB2	protein_coding	670.924	0.847592	0.00169074	0.0089254	11.0298	Rho related BTB domain containing 2 [Source:HGNC Symbol;Acc:HGNC:18756]
ENSG00000008988.9	RPS20	protein_coding	41543.6	-0.592425	0.00355707	0.0158044	1023.23	ribosomal protein S20 [Source:HGNC Symbol;Acc:HGNC:10405]
ENSG00000010256.10	UQCRC1	protein_coding	5200.27	-0.801706	0.000137867	0.00126806	122.937	ubiquinol-cytochrome c reductase core protein 1 [Source:HGNC Symbol;Acc:HGNC:12585]
ENSG00000010270.13	STARD3NL	protein_coding	1806.42	-0.619848	0.00298789	0.0138312	29.8229	STARD3 N-terminal like [Source:HGNC Symbol;Acc:HGNC:19169]
ENSG00000010361.13	FUZ	protein_coding	486.763	0.995144	1.65013e-05	0.000237607	19.7013	fuzzy planar cell polarity protein [Source:HGNC Symbol;Acc:HGNC:26219]
ENSG00000010539.11	ZNF200	protein_coding	576.336	0.838779	0.000835766	0.00514182	8.43918	zinc finger protein 200 [Source:HGNC Symbol;Acc:HGNC:12993]
ENSG00000010704.18	HFE	protein_coding	111.99	0.898759	0.0123977	0.0410622	2.30427	homeostatic iron regulator [Source:HGNC Symbol;Acc:HGNC:4886]
ENSG00000011021.21	CLCN6	protein_coding	2012.09	-0.700186	0.000844982	0.0051767	21.6764	chloride voltage-gated channel 6 [Source:HGNC Symbol;Acc:HGNC:2024]
ENSG00000011132.11	APBA3	protein_coding	1091.77	-1.13819	2.46163e-06	5.13762e-05	17.474	amyloid beta precursor protein binding family A member 3 [Source:HGNC Symbol;Acc:HGNC:580]
ENSG00000011201.10	ANOS1	protein_coding	106.634	1.14973	0.000671098	0.00432348	1.75229	anosmin 1 [Source:HGNC Symbol;Acc:HGNC:6211]
ENSG00000011405.13	PIK3C2A	protein_coding	10387.4	-0.841854	1.84486e-05	0.000258756	82.6153	phosphatidylinositol-4-phosphate 3-kinase catalytic subunit type 2 alpha [Source:HGNC Symbol;Acc:HGNC:8971]
ENSG00000011422.11	PLAUR	protein_coding	1617.85	-1.91298	1.70661e-18	1.75159e-15	34.262	plasminogen activator, urokinase receptor [Source:HGNC Symbol;Acc:HGNC:9053]
ENSG00000011426.10	ANLN	protein_coding	10080.8	-1.22088	1.31387e-11	2.19779e-09	142.604	anillin actin binding protein [Source:HGNC Symbol;Acc:HGNC:14082]
ENSG00000011478.11	QPCTL	protein_coding	3819.89	-1.33792	1.93572e-08	9.72368e-07	149.985	glutaminyl-peptide cyclotransferase like [Source:HGNC Symbol;Acc:HGNC:25952]
ENSG00000011485.14	PPP5C	protein_coding	3562.14	-0.651689	0.000840604	0.00516075	35.5376	protein phosphatase 5 catalytic subunit [Source:HGNC Symbol;Acc:HGNC:9322]
ENSG00000012171.17	SEMA3B	protein_coding	19336.6	-0.674332	0.00113015	0.00650042	251.191	semaphorin 3B [Source:HGNC Symbol;Acc:HGNC:10724]
ENSG00000012174.11	MBTPS2	protein_coding	2492.73	-0.656367	0.000844034	0.00517634	23.1977	membrane bound transcription factor peptidase, site 2 [Source:HGNC Symbol;Acc:HGNC:15455]
ENSG00000012211.12	PRICKLE3	protein_coding	1858.74	-0.689859	0.00102935	0.00603495	41.016	prickle planar cell polarity protein 3 [Source:HGNC Symbol;Acc:HGNC:6645]
ENSG00000012660.13	ELOVL5	protein_coding	1597.8	-0.916517	4.90978e-06	9.04602e-05	33.4513	ELOVL fatty acid elongase 5 [Source:HGNC Symbol;Acc:HGNC:21308]
ENSG00000012822.15	CALCOCO1	protein_coding	7915.14	0.716412	5.90488e-05	0.000648793	94.0236	calcium binding and coiled-coil domain 1 [Source:HGNC Symbol;Acc:HGNC:29306]
ENSG00000013016.14	EHD3	protein_coding	35.9429	1.34112	0.00469139	0.0194532	1.25364	EH domain containing 3 [Source:HGNC Symbol;Acc:HGNC:3244]
ENSG00000013306.15	SLC25A39	protein_coding	3817.55	-0.70017	0.000690016	0.00441651	80.5383	solute carrier family 25 member 39 [Source:HGNC Symbol;Acc:HGNC:24279]
ENSG00000013441.15	CLK1	protein_coding	15761.7	-1.17712	1.20044e-06	2.90908e-05	287.201	CDC like kinase 1 [Source:HGNC Symbol;Acc:HGNC:2068]
ENSG00000013588.5	GPRC5A	protein_coding	55301.9	-1.16659	2.79321e-11	3.93031e-09	553.029	G protein-coupled receptor class C group 5 member A [Source:HGNC Symbol;Acc:HGNC:9836]
ENSG00000013810.18	TACC3	protein_coding	5692.39	-0.72201	0.000157685	0.00140678	62.5692	transforming acidic coiled-coil containing protein 3 [Source:HGNC Symbol;Acc:HGNC:11524]
ENSG00000015153.14	YAF2	protein_coding	555.405	-0.802415	0.0013467	0.00747371	4.12123	YY1 associated factor 2 [Source:HGNC Symbol;Acc:HGNC:17363]
ENSG00000015479.17	MATR3	protein_coding	1385.82	-1.58336	1.57258e-08	8.39093e-07	12.7678	matrin 3 [Source:HGNC Symbol;Acc:HGNC:6912]
ENSG00000015532.9	XYLT2	protein_coding	6349.65	-0.594861	0.000920013	0.00551462	85.6591	xylosyltransferase 2 [Source:HGNC Symbol;Acc:HGNC:15517]
ENSG00000017260.19	ATP2C1	protein_coding	11556.5	-0.842268	6.59716e-06	0.000113406	100.102	ATPase secretory pathway Ca2+ transporting 1 [Source:HGNC Symbol;Acc:HGNC:13211]
ENSG00000018699.11	TTC27	protein_coding	1022.55	0.92188	4.39365e-05	0.000514985	34.0776	tetratricopeptide repeat domain 27 [Source:HGNC Symbol;Acc:HGNC:25986]
ENSG00000019549.8	SNAI2	protein_coding	57.4376	-1.09555	0.00914824	0.0325022	2.75689	snail family transcriptional repressor 2 [Source:HGNC Symbol;Acc:HGNC:11094]
ENSG00000019995.6	ZRANB1	protein_coding	3229.2	-0.723143	0.00016615	0.00146192	38.5125	zinc finger RANBP2-type containing 1 [Source:HGNC Symbol;Acc:HGNC:18224]
ENSG00000020129.15	NCDN	protein_coding	709.367	0.662813	0.00291899	0.0135824	15.8831	neurochondrin [Source:HGNC Symbol;Acc:HGNC:17597]
ENSG00000020181.17	ADGRA2	protein_coding	76.041	1.48683	9.5238e-05	0.000951017	1.51244	adhesion G protein-coupled receptor A2 [Source:HGNC Symbol;Acc:HGNC:17849]
ENSG00000021300.13	PLEKHB1	protein_coding	779.654	1.57252	1.48189e-10	1.63626e-08	21.9286	pleckstrin homology domain containing B1 [Source:HGNC Symbol;Acc:HGNC:19079]
ENSG00000021762.19	OSBPL5	protein_coding	676.046	1.49517	2.21309e-11	3.21783e-09	10.8204	oxysterol binding protein like 5 [Source:HGNC Symbol;Acc:HGNC:16392]
ENSG00000021826.14	CPS1	protein_coding	298.73	1.52495	4.57119e-09	3.03263e-07	3.85363	carbamoyl-phosphate synthase 1 [Source:HGNC Symbol;Acc:HGNC:2323]
ENSG00000022840.15	RNF10	protein_coding	11071.2	-0.64452	0.000947395	0.00563016	131.972	ring finger protein 10 [Source:HGNC Symbol;Acc:HGNC:10055]
ENSG00000022976.15	ZNF839	protein_coding	1146.17	0.680287	0.00168336	0.00889899	22.0285	zinc finger protein 839 [Source:HGNC Symbol;Acc:HGNC:20345]
ENSG00000023228.13	NDUFS1	protein_coding	4245.17	-0.587798	0.00116664	0.00667232	25.9781	NADH:ubiquinone oxidoreductase core subunit S1 [Source:HGNC Symbol;Acc:HGNC:7707]
ENSG00000023902.13	PLEKHO1	protein_coding	977.321	-0.587407	0.00332337	0.0149874	11.0198	pleckstrin homology domain containing O1 [Source:HGNC Symbol;Acc:HGNC:24310]
ENSG00000024422.11	EHD2	protein_coding	2074.67	0.666901	0.000384801	0.00279401	50.7966	EH domain containing 2 [Source:HGNC Symbol;Acc:HGNC:3243]
ENSG00000024862.16	CCDC28A	protein_coding	2098.74	-0.65352	0.00533512	0.0214982	109.396	coiled-coil domain containing 28A [Source:HGNC Symbol;Acc:HGNC:21098]
ENSG00000025039.14	RRAGD	protein_coding	9049.3	-1.06469	1.01644e-06	2.52993e-05	146.339	Ras related GTP binding D [Source:HGNC Symbol;Acc:HGNC:19903]
ENSG00000025156.12	HSF2	protein_coding	1314.76	-1.13729	2.07717e-06	4.50217e-05	45.8152	heat shock transcription factor 2 [Source:HGNC Symbol;Acc:HGNC:5225]
ENSG00000025434.18	NR1H3	protein_coding	493.531	0.722215	0.0140461	0.0453091	11.7515	nuclear receptor subfamily 1 group H member 3 [Source:HGNC Symbol;Acc:HGNC:7966]
ENSG00000025800.13	KPNA6	protein_coding	6268.81	-0.777546	0.00010384	0.00101902	61.2546	karyopherin subunit alpha 6 [Source:HGNC Symbol;Acc:HGNC:6399]
ENSG00000026297.15	RNASET2	protein_coding	8266.44	-0.972902	8.52564e-08	3.31304e-06	87.175	ribonuclease T2 [Source:HGNC Symbol;Acc:HGNC:21686]
ENSG00000027697.12	IFNGR1	protein_coding	2072.3	-1.13485	2.39494e-07	7.70976e-06	68.4594	interferon gamma receptor 1 [Source:HGNC Symbol;Acc:HGNC:5439]
ENSG00000028839.9	TBPL1	protein_coding	1320.18	-0.740735	0.000544764	0.00367657	19.5318	TATA-box binding protein like 1 [Source:HGNC Symbol;Acc:HGNC:11589]
ENSG00000029363.15	BCLAF1	protein_coding	8075.37	-0.641771	0.00476762	0.0196703	68.1287	BCL2 associated transcription factor 1 [Source:HGNC Symbol;Acc:HGNC:16863]
ENSG00000029639.10	TFB1M	protein_coding	733.937	-0.919884	2.68807e-05	0.000347454	20.2047	transcription factor B1, mitochondrial [Source:HGNC Symbol;Acc:HGNC:17037]
ENSG00000029993.14	HMGB3	protein_coding	6360.93	0.731314	0.000261143	0.00207393	184.689	high mobility group box 3 [Source:HGNC Symbol;Acc:HGNC:5004]
ENSG00000030110.12	BAK1	protein_coding	673.549	-1.23713	3.42857e-07	1.02963e-05	27.54	BCL2 antagonist/killer 1 [Source:HGNC Symbol;Acc:HGNC:949]
ENSG00000032389.12	TSSC1	protein_coding	1575.99	-0.621668	0.00176671	0.0092372	19.2244	EARP complex and GARP complex interacting protein 1 [Source:HGNC Symbol;Acc:HGNC:12383]
ENSG00000032742.17	IFT88	protein_coding	1057.81	0.774071	0.000887827	0.00536571	18.6288	intraflagellar transport 88 [Source:HGNC Symbol;Acc:HGNC:20606]
ENSG00000033050.7	ABCF2	protein_coding	448.463	0.682035	0.00907296	0.0322874	11.4167	ATP binding cassette subfamily F member 2 [Source:HGNC Symbol;Acc:HGNC:71]
ENSG00000033100.14	CHPF2	protein_coding	1910.75	0.705086	0.00506313	0.0206261	51.3464	chondroitin polymerizing factor 2 [Source:HGNC Symbol;Acc:HGNC:29270]
ENSG00000033178.12	UBA6	protein_coding	6905.85	-0.950912	1.37599e-06	3.24436e-05	46.1301	ubiquitin like modifier activating enzyme 6 [Source:HGNC Symbol;Acc:HGNC:25581]
ENSG00000034152.18	MAP2K3	protein_coding	1283.36	-0.59911	0.00228223	0.0111841	24.4532	mitogen-activated protein kinase kinase 3 [Source:HGNC Symbol;Acc:HGNC:6843]
ENSG00000034677.11	RNF19A	protein_coding	15193.7	-0.876742	1.53052e-05	0.000222909	195.42	ring finger protein 19A, RBR E3 ubiquitin protein ligase [Source:HGNC Symbol;Acc:HGNC:13432]
ENSG00000034693.14	PEX3	protein_coding	1605.38	-0.906467	4.54194e-06	8.48477e-05	56.666	peroxisomal biogenesis factor 3 [Source:HGNC Symbol;Acc:HGNC:8858]
ENSG00000034713.7	GABARAPL2	protein_coding	6179.05	-0.900414	2.74595e-05	0.00035385	164.507	GABA type A receptor associated protein like 2 [Source:HGNC Symbol;Acc:HGNC:13291]
ENSG00000035403.16	VCL	protein_coding	6334.72	-1.17978	7.3075e-10	6.37507e-08	50.5395	vinculin [Source:HGNC Symbol;Acc:HGNC:12665]
ENSG00000035499.12	DEPDC1B	protein_coding	1667.2	-0.792919	0.000338351	0.00253672	41.946	DEP domain containing 1B [Source:HGNC Symbol;Acc:HGNC:24902]
ENSG00000036257.12	CUL3	protein_coding	6150.51	-0.75788	9.0438e-05	0.000914231	38.7245	cullin 3 [Source:HGNC Symbol;Acc:HGNC:2553]
ENSG00000036672.15	USP2	protein_coding	64.5488	-1.1471	0.00253423	0.0121428	1.2922	ubiquitin specific peptidase 2 [Source:HGNC Symbol;Acc:HGNC:12618]
ENSG00000037042.8	TUBG2	protein_coding	1113.55	-0.589982	0.00495248	0.0202747	27.8936	tubulin gamma 2 [Source:HGNC Symbol;Acc:HGNC:12419]
ENSG00000037897.16	METTL1	protein_coding	235.644	1.04569	0.000445249	0.00314777	10.8931	methyltransferase like 1 [Source:HGNC Symbol;Acc:HGNC:7030]
ENSG00000038382.17	TRIO	protein_coding	14050.2	-0.840466	5.5195e-06	9.89641e-05	60.5002	trio Rho guanine nucleotide exchange factor [Source:HGNC Symbol;Acc:HGNC:12303]
ENSG00000040199.18	PHLPP2	protein_coding	946.68	-0.837919	7.43646e-05	0.000780345	5.58515	PH domain and leucine rich repeat protein phosphatase 2 [Source:HGNC Symbol;Acc:HGNC:29149]
ENSG00000040531.14	CTNS	protein_coding	258.886	0.756619	0.00426249	0.0181483	8.46641	cystinosin, lysosomal cystine transporter [Source:HGNC Symbol;Acc:HGNC:2518]
ENSG00000041988.15	THAP3	protein_coding	1401.89	-0.763123	0.000753978	0.00474753	26.5806	THAP domain containing 3 [Source:HGNC Symbol;Acc:HGNC:20855]
ENSG00000042062.11	FAM65C	protein_coding	110.927	-2.27163	1.73279e-11	2.65208e-09	1.97368	RIPOR family member 3 [Source:HGNC Symbol;Acc:HGNC:16168]
ENSG00000042286.14	AIFM2	protein_coding	2412.51	-0.960323	6.96779e-07	1.84763e-05	35.9342	apoptosis inducing factor, mitochondria associated 2 [Source:HGNC Symbol;Acc:HGNC:21411]
ENSG00000042753.11	AP2S1	protein_coding	5039.73	-0.692902	0.000630084	0.00412212	216.576	adaptor related protein complex 2 subunit sigma 1 [Source:HGNC Symbol;Acc:HGNC:565]
ENSG00000043355.10	ZIC2	protein_coding	673.704	-0.928658	6.25908e-05	0.000678314	16.0776	Zic family member 2 [Source:HGNC Symbol;Acc:HGNC:12873]
ENSG00000047056.14	WDR37	protein_coding	3900.33	-0.718089	0.000381656	0.00278125	50.6923	WD repeat domain 37 [Source:HGNC Symbol;Acc:HGNC:31406]
ENSG00000047230.14	CTPS2	protein_coding	2248.37	0.935069	7.83601e-06	0.000130088	52.784	CTP synthase 2 [Source:HGNC Symbol;Acc:HGNC:2520]
ENSG00000047315.14	POLR2B	protein_coding	7175.38	-0.609705	0.0023792	0.0115601	87.3773	RNA polymerase II subunit B [Source:HGNC Symbol;Acc:HGNC:9188]
ENSG00000047365.11	ARAP2	protein_coding	820.155	0.901064	3.14001e-05	0.000391614	6.78476	ArfGAP with RhoGAP domain, ankyrin repeat and PH domain 2 [Source:HGNC Symbol;Acc:HGNC:16924]
ENSG00000047457.13	CP	protein_coding	200.473	1.56092	8.61374e-07	2.19405e-05	3.9431	ceruloplasmin [Source:HGNC Symbol;Acc:HGNC:2295]
ENSG00000047597.5	XK	protein_coding	57.6488	1.26664	0.00150587	0.00815326	1.39548	X-linked Kx blood group [Source:HGNC Symbol;Acc:HGNC:12811]
ENSG00000047634.14	SCML1	protein_coding	1911.12	-0.921029	5.121e-06	9.30742e-05	26.5012	Scm polycomb group protein like 1 [Source:HGNC Symbol;Acc:HGNC:10580]
ENSG00000048028.11	USP28	protein_coding	2845.06	-0.822415	2.11508e-05	0.000288597	40.5881	ubiquitin specific peptidase 28 [Source:HGNC Symbol;Acc:HGNC:12625]
ENSG00000048342.15	CC2D2A	protein_coding	482.942	0.600932	0.00718848	0.0269267	6.40025	coiled-coil and C2 domain containing 2A [Source:HGNC Symbol;Acc:HGNC:29253]
ENSG00000048392.11	RRM2B	protein_coding	6548.34	-0.662472	0.00105165	0.00612659	83.6927	ribonucleotide reductase regulatory TP53 inducible subunit M2B [Source:HGNC Symbol;Acc:HGNC:17296]
ENSG00000048405.9	ZNF800	protein_coding	1550.33	-0.608653	0.00280569	0.0131879	18.5687	zinc finger protein 800 [Source:HGNC Symbol;Acc:HGNC:27267]
ENSG00000049089.13	COL9A2	protein_coding	176.849	1.01745	0.0011832	0.00674879	5.70548	collagen type IX alpha 2 chain [Source:HGNC Symbol;Acc:HGNC:2218]
ENSG00000049167.13	ERCC8	protein_coding	166.877	0.724152	0.0136291	0.0442502	3.76208	ERCC excision repair 8, CSA ubiquitin ligase complex subunit [Source:HGNC Symbol;Acc:HGNC:3439]
ENSG00000049246.14	PER3	protein_coding	2905.39	1.1864	2.9269e-08	1.38023e-06	40.6025	period circadian regulator 3 [Source:HGNC Symbol;Acc:HGNC:8847]
ENSG00000049449.8	RCN1	protein_coding	683.74	0.64026	0.00237746	0.0115549	9.59264	reticulocalbin 1 [Source:HGNC Symbol;Acc:HGNC:9934]
ENSG00000049883.14	PTCD2	protein_coding	911.355	0.895145	0.000513081	0.0035093	8.05941	pentatricopeptide repeat domain 2 [Source:HGNC Symbol;Acc:HGNC:25734]
ENSG00000050130.17	JKAMP	protein_coding	3884.79	-0.867669	2.51936e-05	0.000329765	68.9202	JNK1/MAPK8 associated membrane protein [Source:HGNC Symbol;Acc:HGNC:20184]
ENSG00000050820.16	BCAR1	protein_coding	4819.17	-0.965468	5.08242e-07	1.43725e-05	39.8896	BCAR1, Cas family scaffold protein [Source:HGNC Symbol;Acc:HGNC:971]
ENSG00000052344.15	PRSS8	protein_coding	36304	-1.34801	4.57147e-11	6.08878e-09	1052.95	serine protease 8 [Source:HGNC Symbol;Acc:HGNC:9491]
ENSG00000052802.12	MSMO1	protein_coding	7510.96	-1.66412	1.13852e-13	3.7112e-11	252.77	methylsterol monooxygenase 1 [Source:HGNC Symbol;Acc:HGNC:10545]
ENSG00000053371.12	AKR7A2	protein_coding	4530	-0.88186	1.0992e-05	0.00017124	191.541	aldo-keto reductase family 7 member A2 [Source:HGNC Symbol;Acc:HGNC:389]
ENSG00000054148.17	PHPT1	protein_coding	12443.4	-0.641182	0.000897632	0.00540438	546.431	phosphohistidine phosphatase 1 [Source:HGNC Symbol;Acc:HGNC:30033]
ENSG00000054179.11	ENTPD2	protein_coding	1727.16	-0.713529	0.000433862	0.00308823	47.1431	ectonucleoside triphosphate diphosphohydrolase 2 [Source:HGNC Symbol;Acc:HGNC:3364]
ENSG00000054267.20	ARID4B	protein_coding	3994.14	-0.617087	0.00220046	0.0108671	25.7184	AT-rich interaction domain 4B [Source:HGNC Symbol;Acc:HGNC:15550]
ENSG00000054282.15	SDCCAG8	protein_coding	644.231	0.667717	0.00206347	0.0103726	12.2856	serologically defined colon cancer antigen 8 [Source:HGNC Symbol;Acc:HGNC:10671]
ENSG00000054392.12	HHAT	protein_coding	379.624	0.939047	0.000459326	0.00321731	11.4796	hedgehog acyltransferase [Source:HGNC Symbol;Acc:HGNC:18270]
ENSG00000054690.13	PLEKHH1	protein_coding	5902.11	-0.624112	0.000444005	0.00314096	41.7	pleckstrin homology, MyTH4 and FERM domain containing H1 [Source:HGNC Symbol;Acc:HGNC:17733]
ENSG00000054793.13	ATP9A	protein_coding	42189.7	0.841738	1.28057e-05	0.000193282	543.017	ATPase phospholipid transporting 9A (putative) [Source:HGNC Symbol;Acc:HGNC:13540]
ENSG00000054967.12	RELT	protein_coding	3914.67	-1.88689	2.28485e-12	5.04634e-10	69.6757	RELT, TNF receptor [Source:HGNC Symbol;Acc:HGNC:13764]
ENSG00000055147.17	FAM114A2	protein_coding	718.569	0.605479	0.007971	0.0292796	10.6258	family with sequence similarity 114 member A2 [Source:HGNC Symbol;Acc:HGNC:1333]
ENSG00000055332.16	EIF2AK2	protein_coding	4653.61	0.83146	0.00329526	0.0149127	45.907	eukaryotic translation initiation factor 2 alpha kinase 2 [Source:HGNC Symbol;Acc:HGNC:9437]
ENSG00000055483.19	USP36	protein_coding	6726.9	-0.70373	0.000487915	0.00337154	53.1418	ubiquitin specific peptidase 36 [Source:HGNC Symbol;Acc:HGNC:20062]
ENSG00000055732.12	MCOLN3	protein_coding	373.791	0.920387	0.0006945	0.00444032	6.51567	mucolipin 3 [Source:HGNC Symbol;Acc:HGNC:13358]
ENSG00000056998.18	GYG2	protein_coding	397.336	0.744744	0.00180336	0.00938714	11.2579	glycogenin 2 [Source:HGNC Symbol;Acc:HGNC:4700]
ENSG00000057019.15	DCBLD2	protein_coding	2551.3	1.41634	4.42747e-08	1.93126e-06	27.7024	discoidin, CUB and LCCL domain containing 2 [Source:HGNC Symbol;Acc:HGNC:24627]
ENSG00000058091.16	CDK14	protein_coding	197.708	1.71833	7.91858e-09	4.84784e-07	4.09916	cyclin dependent kinase 14 [Source:HGNC Symbol;Acc:HGNC:8883]
ENSG00000058272.16	PPP1R12A	protein_coding	8613.35	-0.680128	0.000192194	0.00163501	53.0004	protein phosphatase 1 regulatory subunit 12A [Source:HGNC Symbol;Acc:HGNC:7618]
ENSG00000058404.19	CAMK2B	protein_coding	306.382	0.920872	0.000808218	0.0050113	4.71918	calcium/calmodulin dependent protein kinase II beta [Source:HGNC Symbol;Acc:HGNC:1461]
ENSG00000058668.14	ATP2B4	protein_coding	5514.73	0.589337	0.00684671	0.0259417	55.0862	ATPase plasma membrane Ca2+ transporting 4 [Source:HGNC Symbol;Acc:HGNC:817]
ENSG00000059378.12	PARP12	protein_coding	351.083	0.8903	0.00525565	0.0212565	5.95959	poly(ADP-ribose) polymerase family member 12 [Source:HGNC Symbol;Acc:HGNC:21919]
ENSG00000059728.10	MXD1	protein_coding	16971.8	-2.18278	1.33448e-17	1.1642e-14	302.377	MAX dimerization protein 1 [Source:HGNC Symbol;Acc:HGNC:6761]
ENSG00000059758.7	CDK17	protein_coding	3506.74	-1.14393	3.20735e-08	1.48479e-06	44.2218	cyclin dependent kinase 17 [Source:HGNC Symbol;Acc:HGNC:8750]
ENSG00000059769.19	DNAJC25	protein_coding	1335.63	-0.960301	0.000456701	0.00320278	48.5421	DnaJ heat shock protein family (Hsp40) member C25 [Source:HGNC Symbol;Acc:HGNC:34187]
ENSG00000060069.16	CTDP1	protein_coding	1253.54	-0.908686	1.34722e-05	0.000200394	12.8592	CTD phosphatase subunit 1 [Source:HGNC Symbol;Acc:HGNC:2498]
ENSG00000060656.19	PTPRU	protein_coding	6847.45	-0.704516	7.17379e-05	0.000758595	80.0476	protein tyrosine phosphatase, receptor type U [Source:HGNC Symbol;Acc:HGNC:9683]
ENSG00000061273.17	HDAC7	protein_coding	1347.05	0.825258	5.31679e-05	0.000598113	14.6205	histone deacetylase 7 [Source:HGNC Symbol;Acc:HGNC:14067]
ENSG00000061936.9	SFSWAP	protein_coding	4722.91	-0.7682	0.000149988	0.00135314	34.2698	splicing factor SWAP [Source:HGNC Symbol;Acc:HGNC:10790]
ENSG00000062370.16	ZNF112	protein_coding	422.802	0.955222	0.000564805	0.0037801	12.9136	zinc finger protein 112 [Source:HGNC Symbol;Acc:HGNC:12892]
ENSG00000063127.15	SLC6A16	protein_coding	217.918	0.971578	0.00265561	0.0126219	6.88335	solute carrier family 6 member 16 [Source:HGNC Symbol;Acc:HGNC:13622]
ENSG00000063854.12	HAGH	protein_coding	3771.35	-1.6528	1.48599e-19	2.16062e-16	61.6645	hydroxyacylglutathione hydrolase [Source:HGNC Symbol;Acc:HGNC:4805]
ENSG00000063978.15	RNF4	protein_coding	5165.84	-0.637715	0.000642891	0.00418363	50.5896	ring finger protein 4 [Source:HGNC Symbol;Acc:HGNC:10067]
ENSG00000064012.21	CASP8	protein_coding	1106.74	1.00346	0.000113077	0.00108763	17.842	caspase 8 [Source:HGNC Symbol;Acc:HGNC:1509]
ENSG00000064102.14	ASUN	protein_coding	2760.47	-0.804881	4.84244e-05	0.000552951	60.3836	integrator complex subunit 13 [Source:HGNC Symbol;Acc:HGNC:20174]
ENSG00000064205.10	WISP2	protein_coding	33056.5	-1.32118	2.03082e-12	4.57645e-10	545.149	WNT1 inducible signaling pathway protein 2 [Source:HGNC Symbol;Acc:HGNC:12770]
ENSG00000064545.14	TMEM161A	protein_coding	1515.72	-0.641007	0.00143186	0.00787119	32.0323	transmembrane protein 161A [Source:HGNC Symbol;Acc:HGNC:26020]
ENSG00000064607.16	SUGP2	protein_coding	5837.09	-0.652777	0.00033243	0.00250011	50.3652	SURP and G-patch domain containing 2 [Source:HGNC Symbol;Acc:HGNC:18641]
ENSG00000064655.18	EYA2	protein_coding	226.195	1.50874	4.27494e-07	1.23902e-05	7.42081	EYA transcriptional coactivator and phosphatase 2 [Source:HGNC Symbol;Acc:HGNC:3520]
ENSG00000064703.11	DDX20	protein_coding	645.545	-0.601948	0.00911743	0.0324126	7.73211	DEAD-box helicase 20 [Source:HGNC Symbol;Acc:HGNC:2743]
ENSG00000064726.9	BTBD1	protein_coding	5386.98	-0.640117	0.000345523	0.0025699	96.6588	BTB domain containing 1 [Source:HGNC Symbol;Acc:HGNC:1120]
ENSG00000064787.12	BCAS1	protein_coding	19468.9	0.988136	2.50534e-05	0.000328423	268.124	breast carcinoma amplified sequence 1 [Source:HGNC Symbol;Acc:HGNC:974]
ENSG00000064932.15	SBNO2	protein_coding	7400.38	-1.18998	1.14924e-07	4.16881e-06	98.3632	strawberry notch homolog 2 [Source:HGNC Symbol;Acc:HGNC:29158]
ENSG00000065054.13	SLC9A3R2	protein_coding	6129.57	-0.596801	0.0008918	0.005383	126.839	SLC9A3 regulator 2 [Source:HGNC Symbol;Acc:HGNC:11076]
ENSG00000065057.7	NTHL1	protein_coding	1485.06	-0.778596	7.15251e-05	0.000756804	50.2429	nth like DNA glycosylase 1 [Source:HGNC Symbol;Acc:HGNC:8028]
ENSG00000065308.4	TRAM2	protein_coding	12806.2	-0.890676	1.23581e-05	0.000187873	176.28	translocation associated membrane protein 2 [Source:HGNC Symbol;Acc:HGNC:16855]
ENSG00000065320.8	NTN1	protein_coding	1051.11	0.631741	0.00190276	0.00972447	15.9612	netrin 1 [Source:HGNC Symbol;Acc:HGNC:8029]
ENSG00000065357.19	DGKA	protein_coding	858.054	0.595842	0.00377739	0.0165514	8.67659	diacylglycerol kinase alpha [Source:HGNC Symbol;Acc:HGNC:2849]
ENSG00000065457.10	ADAT1	protein_coding	431.954	0.76966	0.0072647	0.0271532	11.32	adenosine deaminase, tRNA specific 1 [Source:HGNC Symbol;Acc:HGNC:228]
ENSG00000065491.8	TBC1D22B	protein_coding	1615.88	-0.712156	0.000721612	0.00457178	34.0028	TBC1 domain family member 22B [Source:HGNC Symbol;Acc:HGNC:21602]
ENSG00000065526.10	SPEN	protein_coding	11103.7	-0.786666	1.34288e-05	0.00019992	64.7777	spen family transcriptional repressor [Source:HGNC Symbol;Acc:HGNC:17575]
ENSG00000065548.17	ZC3H15	protein_coding	6249.35	-0.756027	0.000843449	0.00517458	160.166	zinc finger CCCH-type containing 15 [Source:HGNC Symbol;Acc:HGNC:29528]
ENSG00000065665.20	SEC61A2	protein_coding	332.93	-0.859907	0.00275648	0.0130079	7.40008	Sec61 translocon alpha 2 subunit [Source:HGNC Symbol;Acc:HGNC:17702]
ENSG00000065978.17	YBX1	protein_coding	22029.3	-0.936952	2.84623e-06	5.71153e-05	894.942	Y-box binding protein 1 [Source:HGNC Symbol;Acc:HGNC:8014]
ENSG00000066084.12	DIP2B	protein_coding	10036.6	-0.721108	9.8541e-05	0.000978011	73.6907	disco interacting protein 2 homolog B [Source:HGNC Symbol;Acc:HGNC:29284]
ENSG00000066136.19	NFYC	protein_coding	2099.81	-0.596285	0.00275592	0.0130079	24.1224	nuclear transcription factor Y subunit gamma [Source:HGNC Symbol;Acc:HGNC:7806]
ENSG00000066248.14	NGEF	protein_coding	1258.53	-0.694121	0.000823959	0.00508901	18.972	neuronal guanine nucleotide exchange factor [Source:HGNC Symbol;Acc:HGNC:7807]
ENSG00000066279.16	ASPM	protein_coding	5048.52	0.827153	0.00356216	0.0158229	52.8433	abnormal spindle microtubule assembly [Source:HGNC Symbol;Acc:HGNC:19048]
ENSG00000066379.14	ZNRD1	protein_coding	1315.91	-0.733201	0.00176975	0.00924786	27.8759	zinc ribbon domain containing 1 [Source:HGNC Symbol;Acc:HGNC:13182]
ENSG00000066468.20	FGFR2	protein_coding	546.585	1.02828	4.85886e-05	0.000554463	9.20044	fibroblast growth factor receptor 2 [Source:HGNC Symbol;Acc:HGNC:3689]
ENSG00000066583.11	ISOC1	protein_coding	4040.1	-0.802648	6.47247e-05	0.000697971	156.431	isochorismatase domain containing 1 [Source:HGNC Symbol;Acc:HGNC:24254]
ENSG00000066697.14	MSANTD3	protein_coding	2812.42	-0.781186	0.000219006	0.00181186	77.0419	Myb/SANT DNA binding domain containing 3 [Source:HGNC Symbol;Acc:HGNC:23370]
ENSG00000066926.10	FECH	protein_coding	709.491	0.833465	7.18573e-05	0.000758972	16.7776	ferrochelatase [Source:HGNC Symbol;Acc:HGNC:3647]
ENSG00000067064.10	IDI1	protein_coding	8584.2	-1.40598	1.12678e-09	9.36195e-08	226.918	isopentenyl-diphosphate delta isomerase 1 [Source:HGNC Symbol;Acc:HGNC:5387]
ENSG00000067113.16	PLPP1	protein_coding	784.863	-0.902081	0.000112657	0.00108479	31.299	phospholipid phosphatase 1 [Source:HGNC Symbol;Acc:HGNC:9228]
ENSG00000067225.17	PKM	protein_coding	173214	-0.598807	0.00271762	0.0128606	1454.32	pyruvate kinase M1/2 [Source:HGNC Symbol;Acc:HGNC:9021]
ENSG00000067365.14	METTL22	protein_coding	3244.15	-0.586176	0.00785256	0.0289481	28.6937	methyltransferase like 22 [Source:HGNC Symbol;Acc:HGNC:28368]
ENSG00000067533.5	RRP15	protein_coding	916.928	0.730352	0.00270782	0.0128247	12.5151	ribosomal RNA processing 15 homolog [Source:HGNC Symbol;Acc:HGNC:24255]
ENSG00000067704.9	IARS2	protein_coding	16049.9	-1.02777	3.22521e-08	1.48479e-06	305.631	isoleucyl-tRNA synthetase 2, mitochondrial [Source:HGNC Symbol;Acc:HGNC:29685]
ENSG00000067829.18	IDH3G	protein_coding	7261.37	-0.700436	0.000303795	0.00233199	191.05	isocitrate dehydrogenase 3 (NAD(+)) gamma [Source:HGNC Symbol;Acc:HGNC:5386]
ENSG00000067955.13	CBFB	protein_coding	1532.84	-0.905132	2.32466e-06	4.91048e-05	30.2232	core-binding factor subunit beta [Source:HGNC Symbol;Acc:HGNC:1539]
ENSG00000067992.12	PDK3	protein_coding	3736.72	-1.00963	7.18524e-08	2.88866e-06	111.875	pyruvate dehydrogenase kinase 3 [Source:HGNC Symbol;Acc:HGNC:8811]
ENSG00000068028.17	RASSF1	protein_coding	5090.1	-1.57879	2.37953e-10	2.44992e-08	140.994	Ras association domain family member 1 [Source:HGNC Symbol;Acc:HGNC:9882]
ENSG00000068079.7	IFI35	protein_coding	192.581	1.14925	5.88704e-05	0.000647649	12.1142	interferon induced protein 35 [Source:HGNC Symbol;Acc:HGNC:5399]
ENSG00000068323.16	TFE3	protein_coding	5350.4	-0.858275	0.000101906	0.00100455	100.944	transcription factor binding to IGHM enhancer 3 [Source:HGNC Symbol;Acc:HGNC:11752]
ENSG00000068796.16	KIF2A	protein_coding	3104.95	-0.737125	0.000430397	0.00306763	48.8267	kinesin family member 2A [Source:HGNC Symbol;Acc:HGNC:6318]
ENSG00000068885.14	IFT80	protein_coding	504.345	1.19267	5.11691e-05	0.000579363	8.75834	intraflagellar transport 80 [Source:HGNC Symbol;Acc:HGNC:29262]
ENSG00000068971.13	PPP2R5B	protein_coding	2468.31	-1.36606	1.90866e-11	2.85615e-09	60.8971	protein phosphatase 2 regulatory subunit B'beta [Source:HGNC Symbol;Acc:HGNC:9310]
ENSG00000068976.13	PYGM	protein_coding	89.4008	1.72452	1.19084e-05	0.000182369	2.61074	glycogen phosphorylase, muscle associated [Source:HGNC Symbol;Acc:HGNC:9726]
ENSG00000069399.12	BCL3	protein_coding	3112.06	-0.969811	2.77561e-05	0.000356356	82.1356	B cell CLL/lymphoma 3 [Source:HGNC Symbol;Acc:HGNC:998]
ENSG00000069482.6	GAL	protein_coding	293.42	-1.11762	0.000245875	0.00198612	21.7777	galanin and GMAP prepropeptide [Source:HGNC Symbol;Acc:HGNC:4114]
ENSG00000069493.14	CLEC2D	protein_coding	231.411	1.42517	1.4902e-06	3.4622e-05	4.68869	C-type lectin domain family 2 member D [Source:HGNC Symbol;Acc:HGNC:14351]
ENSG00000069535.13	MAOB	protein_coding	44.8976	1.50338	0.000547546	0.00369006	2.48779	monoamine oxidase B [Source:HGNC Symbol;Acc:HGNC:6834]
ENSG00000069812.11	HES2	protein_coding	162.868	0.758811	0.0108292	0.0369358	3.01477	hes family bHLH transcription factor 2 [Source:HGNC Symbol;Acc:HGNC:16005]
ENSG00000069998.12	CECR5	protein_coding	5966.19	-0.878126	3.1263e-05	0.000390463	95.9363	haloacid dehalogenase like hydrolase domain containing 5 [Source:HGNC Symbol;Acc:HGNC:1843]
ENSG00000070371.15	CLTCL1	protein_coding	446.096	-0.736852	0.00124895	0.00701823	3.65206	clathrin heavy chain like 1 [Source:HGNC Symbol;Acc:HGNC:2093]
ENSG00000070423.17	RNF126	protein_coding	2973.15	-1.49856	5.66967e-09	3.6236e-07	86.4818	ring finger protein 126 [Source:HGNC Symbol;Acc:HGNC:21151]
ENSG00000070476.14	ZXDC	protein_coding	3558.81	-0.745559	0.000279263	0.0021811	36.1492	ZXD family zinc finger C [Source:HGNC Symbol;Acc:HGNC:28160]
ENSG00000070495.14	JMJD6	protein_coding	4732.24	-1.37406	1.03425e-09	8.63428e-08	72.5243	jumonji domain containing 6, arginine demethylase and lysine hydroxylase [Source:HGNC Symbol;Acc:HGNC:19355]
ENSG00000070614.14	NDST1	protein_coding	1565.29	1.05391	6.79652e-06	0.000116374	19.0523	N-deacetylase and N-sulfotransferase 1 [Source:HGNC Symbol;Acc:HGNC:7680]
ENSG00000071054.16	MAP4K4	protein_coding	2548.57	1.20851	4.19037e-09	2.856e-07	24.9255	mitogen-activated protein kinase kinase kinase kinase 4 [Source:HGNC Symbol;Acc:HGNC:6866]
ENSG00000071242.11	RPS6KA2	protein_coding	880.64	0.788927	0.000576569	0.00385028	11.193	ribosomal protein S6 kinase A2 [Source:HGNC Symbol;Acc:HGNC:10431]
ENSG00000071246.10	VASH1	protein_coding	124.318	1.65337	1.18805e-05	0.000182314	2.83801	vasohibin 1 [Source:HGNC Symbol;Acc:HGNC:19964]
ENSG00000071462.11	WBSCR22	protein_coding	4150.49	-1.05936	1.9012e-06	4.20433e-05	44.5898	BUD23, rRNA methyltransferase and ribosome maturation factor [Source:HGNC Symbol;Acc:HGNC:16405]
ENSG00000071553.16	ATP6AP1	protein_coding	18653	-0.776784	4.82985e-05	0.000551874	278.35	ATPase H+ transporting accessory protein 1 [Source:HGNC Symbol;Acc:HGNC:868]
ENSG00000071626.16	DAZAP1	protein_coding	8549.05	-0.951712	2.10754e-06	4.56232e-05	72.5696	DAZ associated protein 1 [Source:HGNC Symbol;Acc:HGNC:2683]
ENSG00000071655.17	MBD3	protein_coding	1572.35	-0.66561	0.000862635	0.005248	16.9738	methyl-CpG binding domain protein 3 [Source:HGNC Symbol;Acc:HGNC:6918]
ENSG00000071794.15	HLTF	protein_coding	3995.16	0.760611	0.0001166	0.00111111	69.0427	helicase like transcription factor [Source:HGNC Symbol;Acc:HGNC:11099]
ENSG00000072042.12	RDH11	protein_coding	4789.94	-1.62163	3.74466e-12	7.68668e-10	85.6482	retinol dehydrogenase 11 [Source:HGNC Symbol;Acc:HGNC:17964]
ENSG00000072121.15	ZFYVE26	protein_coding	2736	0.596158	0.00569627	0.0226449	16.7583	zinc finger FYVE-type containing 26 [Source:HGNC Symbol;Acc:HGNC:20761]
ENSG00000072133.10	RPS6KA6	protein_coding	263.779	0.933159	0.00117858	0.006729	10.6747	ribosomal protein S6 kinase A6 [Source:HGNC Symbol;Acc:HGNC:10435]
ENSG00000072310.16	SREBF1	protein_coding	24300.4	-1.56406	4.60659e-10	4.29188e-08	311.264	sterol regulatory element binding transcription factor 1 [Source:HGNC Symbol;Acc:HGNC:11289]
ENSG00000072518.20	MARK2	protein_coding	5805.35	-0.826287	1.33559e-05	0.000199174	91.824	microtubule affinity regulating kinase 2 [Source:HGNC Symbol;Acc:HGNC:3332]
ENSG00000072682.18	P4HA2	protein_coding	10424.5	-0.971873	1.91695e-06	4.22844e-05	96.1908	prolyl 4-hydroxylase subunit alpha 2 [Source:HGNC Symbol;Acc:HGNC:8547]
ENSG00000072786.12	STK10	protein_coding	1334.88	0.778052	0.000224649	0.00184625	15.2688	serine/threonine kinase 10 [Source:HGNC Symbol;Acc:HGNC:11388]
ENSG00000072803.17	FBXW11	protein_coding	7490.99	-0.726228	0.00011424	0.0010934	104.438	F-box and WD repeat domain containing 11 [Source:HGNC Symbol;Acc:HGNC:13607]
ENSG00000072858.10	SIDT1	protein_coding	1203.75	0.772454	0.000577786	0.00385394	16.1792	SID1 transmembrane family member 1 [Source:HGNC Symbol;Acc:HGNC:25967]
ENSG00000072864.12	NDE1	protein_coding	3166.83	-0.868685	5.35408e-06	9.68062e-05	45.2083	nudE neurodevelopment protein 1 [Source:HGNC Symbol;Acc:HGNC:17619]
ENSG00000073169.13	SELO	protein_coding	1208.08	-0.926734	2.93614e-05	0.00037211	40.6335	selenoprotein O [Source:HGNC Symbol;Acc:HGNC:30395]
ENSG00000073331.17	ALPK1	protein_coding	1748.1	0.644113	0.00706627	0.0265831	14.2651	alpha kinase 1 [Source:HGNC Symbol;Acc:HGNC:20917]
ENSG00000073670.13	ADAM11	protein_coding	117.774	0.950159	0.0036225	0.0160095	2.96991	ADAM metallopeptidase domain 11 [Source:HGNC Symbol;Acc:HGNC:189]
ENSG00000073711.10	PPP2R3A	protein_coding	1025.64	0.785202	0.000216587	0.00179867	13.6083	protein phosphatase 2 regulatory subunit B''alpha [Source:HGNC Symbol;Acc:HGNC:9307]
ENSG00000073712.14	FERMT2	protein_coding	3375.52	-0.84261	8.90356e-06	0.000144109	29.5218	fermitin family member 2 [Source:HGNC Symbol;Acc:HGNC:15767]
ENSG00000073910.19	FRY	protein_coding	612.156	-0.663657	0.00788711	0.0290622	3.04587	FRY microtubule binding protein [Source:HGNC Symbol;Acc:HGNC:20367]
ENSG00000074201.8	CLNS1A	protein_coding	6915.79	0.609069	0.000734198	0.00464309	143.225	chloride nucleotide-sensitive channel 1A [Source:HGNC Symbol;Acc:HGNC:2080]
ENSG00000074219.13	TEAD2	protein_coding	1237.78	0.744521	0.000752088	0.00474209	42.7847	TEA domain transcription factor 2 [Source:HGNC Symbol;Acc:HGNC:11715]
ENSG00000074266.17	EED	protein_coding	2074.67	-0.675511	0.00123685	0.00696838	21.7178	embryonic ectoderm development [Source:HGNC Symbol;Acc:HGNC:3188]
ENSG00000074410.13	CA12	protein_coding	10586.1	-1.2179	3.47178e-10	3.46146e-08	118.333	carbonic anhydrase 12 [Source:HGNC Symbol;Acc:HGNC:1371]
ENSG00000074416.13	MGLL	protein_coding	3624.63	-1.36757	3.22472e-13	9.22375e-11	35.0881	monoglyceride lipase [Source:HGNC Symbol;Acc:HGNC:17038]
ENSG00000074527.11	NTN4	protein_coding	1971.06	1.64075	3.76234e-13	1.05879e-10	61.1567	netrin 4 [Source:HGNC Symbol;Acc:HGNC:13658]
ENSG00000074621.13	SLC24A1	protein_coding	1538.49	1.15767	3.22183e-07	9.87954e-06	19.3858	solute carrier family 24 member 1 [Source:HGNC Symbol;Acc:HGNC:10975]
ENSG00000074695.5	LMAN1	protein_coding	17787.7	-0.860383	1.58956e-05	0.000229781	197.946	lectin, mannose binding 1 [Source:HGNC Symbol;Acc:HGNC:6631]
ENSG00000074842.7	MYDGF	protein_coding	3212.21	-0.746599	0.000142788	0.00130301	137.482	myeloid derived growth factor [Source:HGNC Symbol;Acc:HGNC:16948]
ENSG00000074855.10	ANO8	protein_coding	1761.13	-0.826478	1.84921e-05	0.000259157	26.7177	anoctamin 8 [Source:HGNC Symbol;Acc:HGNC:29329]
ENSG00000074964.16	ARHGEF10L	protein_coding	4392.44	-0.697432	0.00130235	0.00726869	42.9567	Rho guanine nucleotide exchange factor 10 like [Source:HGNC Symbol;Acc:HGNC:25540]
ENSG00000075131.9	TIPIN	protein_coding	244.6	0.893516	0.00070396	0.00448601	10.0732	TIMELESS interacting protein [Source:HGNC Symbol;Acc:HGNC:30750]
ENSG00000075239.13	ACAT1	protein_coding	523.309	0.763929	0.000642985	0.00418363	9.38031	acetyl-CoA acetyltransferase 1 [Source:HGNC Symbol;Acc:HGNC:93]
ENSG00000075399.12	VPS9D1	protein_coding	568.565	1.0422	2.51602e-05	0.000329576	20.7265	VPS9 domain containing 1 [Source:HGNC Symbol;Acc:HGNC:13526]
ENSG00000075407.17	ZNF37A	protein_coding	1409.13	1.64745	2.28282e-09	1.66656e-07	19.8037	zinc finger protein 37A [Source:HGNC Symbol;Acc:HGNC:13102]
ENSG00000075415.12	SLC25A3	protein_coding	19222.5	-0.73369	0.000318646	0.00242745	162.462	solute carrier family 25 member 3 [Source:HGNC Symbol;Acc:HGNC:10989]
ENSG00000075420.12	FNDC3B	protein_coding	4846.09	-0.746724	4.94687e-05	0.000562666	28.4753	fibronectin type III domain containing 3B [Source:HGNC Symbol;Acc:HGNC:24670]
ENSG00000075702.16	WDR62	protein_coding	721.851	-1.30317	2.18813e-09	1.60414e-07	6.07315	WD repeat domain 62 [Source:HGNC Symbol;Acc:HGNC:24502]
ENSG00000075785.12	RAB7A	protein_coding	15257.5	-0.830785	3.01822e-05	0.000379135	417.535	RAB7A, member RAS oncogene family [Source:HGNC Symbol;Acc:HGNC:9788]
ENSG00000075856.11	SART3	protein_coding	5585.11	-1.00612	5.94903e-06	0.000104216	64.7326	spliceosome associated factor 3, U4/U6 recycling protein [Source:HGNC Symbol;Acc:HGNC:16860]
ENSG00000075914.12	EXOSC7	protein_coding	1628.73	-0.885213	0.000112462	0.00108351	29.2519	exosome component 7 [Source:HGNC Symbol;Acc:HGNC:28112]
ENSG00000076108.11	BAZ2A	protein_coding	18202.9	-0.889903	1.06267e-05	0.000166739	129.317	bromodomain adjacent to zinc finger domain 2A [Source:HGNC Symbol;Acc:HGNC:962]
ENSG00000076248.10	UNG	protein_coding	1788.91	0.740304	9.4396e-05	0.000943851	72.4788	uracil DNA glycosylase [Source:HGNC Symbol;Acc:HGNC:12572]
ENSG00000076258.9	FMO4	protein_coding	469.49	1.56901	1.195e-08	6.74767e-07	23.3792	flavin containing monooxygenase 4 [Source:HGNC Symbol;Acc:HGNC:3772]
ENSG00000076382.16	SPAG5	protein_coding	7679.17	-1.45026	3.39993e-11	4.7081e-09	128.308	sperm associated antigen 5 [Source:HGNC Symbol;Acc:HGNC:13452]
ENSG00000076555.15	ACACB	protein_coding	785.684	0.857812	0.000460831	0.00322397	5.78484	acetyl-CoA carboxylase beta [Source:HGNC Symbol;Acc:HGNC:85]
ENSG00000076650.6	GPATCH1	protein_coding	1546.94	-0.691126	0.00143763	0.00789541	25.6938	G-patch domain containing 1 [Source:HGNC Symbol;Acc:HGNC:24658]
ENSG00000076864.19	RAP1GAP	protein_coding	6538.11	-0.727775	0.00174474	0.00915557	88.829	RAP1 GTPase activating protein [Source:HGNC Symbol;Acc:HGNC:9858]
ENSG00000076924.11	XAB2	protein_coding	4410.2	-0.984395	1.80049e-05	0.000253347	78.7738	XPA binding protein 2 [Source:HGNC Symbol;Acc:HGNC:14089]
ENSG00000076944.14	STXBP2	protein_coding	2473.38	-0.593037	0.0026817	0.0127286	32.2583	syntaxin binding protein 2 [Source:HGNC Symbol;Acc:HGNC:11445]
ENSG00000077150.17	NFKB2	protein_coding	5553.06	-0.998316	1.76645e-06	3.97177e-05	99.8215	nuclear factor kappa B subunit 2 [Source:HGNC Symbol;Acc:HGNC:7795]
ENSG00000077152.9	UBE2T	protein_coding	2683.18	-1.2752	9.21471e-11	1.11652e-08	203.665	ubiquitin conjugating enzyme E2 T [Source:HGNC Symbol;Acc:HGNC:25009]
ENSG00000077684.15	JADE1	protein_coding	1959.6	-0.675033	0.000671204	0.00432348	16.3425	jade family PHD finger 1 [Source:HGNC Symbol;Acc:HGNC:30027]
ENSG00000078018.19	MAP2	protein_coding	2411.23	1.84185	1.68318e-16	1.27688e-13	27.9998	microtubule associated protein 2 [Source:HGNC Symbol;Acc:HGNC:6839]
ENSG00000078061.12	ARAF	protein_coding	5255.9	-0.650082	0.000853308	0.00521124	106.391	A-Raf proto-oncogene, serine/threonine kinase [Source:HGNC Symbol;Acc:HGNC:646]
ENSG00000078070.11	MCCC1	protein_coding	3092.36	0.712024	0.000220405	0.00181912	74.3635	methylcrotonoyl-CoA carboxylase 1 [Source:HGNC Symbol;Acc:HGNC:6936]
ENSG00000078081.7	LAMP3	protein_coding	37.6819	1.39775	0.00202034	0.0102078	1.2878	lysosomal associated membrane protein 3 [Source:HGNC Symbol;Acc:HGNC:14582]
ENSG00000078114.18	NEBL	protein_coding	11117.1	0.59398	0.00626791	0.0243244	81.7364	nebulette [Source:HGNC Symbol;Acc:HGNC:16932]
ENSG00000078319.8	PMS2P1	unprocessed_pseudogene	762.796	-1.29927	2.21978e-05	0.000299309	78.8592	PMS1 homolog 2, mismatch repair system component pseudogene 1 [Source:HGNC Symbol;Acc:HGNC:9123]
ENSG00000078401.6	EDN1	protein_coding	747.222	0.858577	0.000176378	0.00153412	43.6321	endothelin 1 [Source:HGNC Symbol;Acc:HGNC:3176]
ENSG00000078487.17	ZCWPW1	protein_coding	230.444	2.15326	8.06166e-12	1.49638e-09	9.74341	zinc finger CW-type and PWWP domain containing 1 [Source:HGNC Symbol;Acc:HGNC:23486]
ENSG00000078668.13	VDAC3	protein_coding	3630.89	-0.597769	0.00410089	0.0176368	83.9689	voltage dependent anion channel 3 [Source:HGNC Symbol;Acc:HGNC:12674]
ENSG00000078804.12	TP53INP2	protein_coding	891.095	-0.978743	2.73808e-06	5.52939e-05	16.2694	tumor protein p53 inducible nuclear protein 2 [Source:HGNC Symbol;Acc:HGNC:16104]
ENSG00000078900.14	TP73	protein_coding	644.05	-0.6232	0.00350989	0.0156585	7.39449	tumor protein p73 [Source:HGNC Symbol;Acc:HGNC:12003]
ENSG00000079277.19	MKNK1	protein_coding	1657.13	0.632782	0.00108574	0.00628739	21.2267	MAP kinase interacting serine/threonine kinase 1 [Source:HGNC Symbol;Acc:HGNC:7110]
ENSG00000079313.11	REXO1	protein_coding	1513.68	-0.874871	3.73387e-05	0.000448682	22.4626	RNA exonuclease 1 homolog [Source:HGNC Symbol;Acc:HGNC:24616]
ENSG00000079335.18	CDC14A	protein_coding	516.437	-0.605521	0.00776374	0.0286874	7.52296	cell division cycle 14A [Source:HGNC Symbol;Acc:HGNC:1718]
ENSG00000079393.20	DUSP13	protein_coding	83.3107	-1.6916	5.0288e-06	9.17808e-05	3.64331	dual specificity phosphatase 13 [Source:HGNC Symbol;Acc:HGNC:19681]
ENSG00000079459.12	FDFT1	protein_coding	7397.01	-0.958113	3.5454e-06	6.84294e-05	123.715	farnesyl-diphosphate farnesyltransferase 1 [Source:HGNC Symbol;Acc:HGNC:3629]
ENSG00000079616.12	KIF22	protein_coding	9129.59	-0.914653	7.70678e-07	2.00698e-05	162.535	kinesin family member 22 [Source:HGNC Symbol;Acc:HGNC:6391]
ENSG00000079691.17	LRRC16A	protein_coding	2139.42	0.838232	0.000299833	0.00230869	34.2995	capping protein regulator and myosin 1 linker 1 [Source:HGNC Symbol;Acc:HGNC:21581]
ENSG00000079974.17	RABL2B	protein_coding	254.972	1.03922	0.000522301	0.00356259	4.92827	RAB, member of RAS oncogene family like 2B [Source:HGNC Symbol;Acc:HGNC:9800]
ENSG00000080031.9	PTPRH	protein_coding	705.576	0.641397	0.00593565	0.0233255	15.9713	protein tyrosine phosphatase, receptor type H [Source:HGNC Symbol;Acc:HGNC:9672]
ENSG00000080224.17	EPHA6	protein_coding	2767.93	-0.692595	0.000661613	0.0042815	31.6715	EPH receptor A6 [Source:HGNC Symbol;Acc:HGNC:19296]
ENSG00000080371.5	RAB21	protein_coding	6244.3	-0.855241	1.98666e-05	0.000274018	29.7631	RAB21, member RAS oncogene family [Source:HGNC Symbol;Acc:HGNC:18263]
ENSG00000080546.13	SESN1	protein_coding	3412.27	-1.07831	1.15978e-05	0.000178604	60.3301	sestrin 1 [Source:HGNC Symbol;Acc:HGNC:21595]
ENSG00000080802.18	CNOT4	protein_coding	2689.5	-0.673587	0.000668851	0.00431428	27.4066	CCR4-NOT transcription complex subunit 4 [Source:HGNC Symbol;Acc:HGNC:7880]
ENSG00000080819.6	CPOX	protein_coding	1289.41	-0.601233	0.00248636	0.011984	28.8282	coproporphyrinogen oxidase [Source:HGNC Symbol;Acc:HGNC:2321]
ENSG00000080822.16	CLDND1	protein_coding	5347.31	-0.885176	9.22179e-06	0.000148708	78.3542	claudin domain containing 1 [Source:HGNC Symbol;Acc:HGNC:1322]
ENSG00000080823.21	MOK	protein_coding	454.995	0.711266	0.00216207	0.0107414	4.53228	MOK protein kinase [Source:HGNC Symbol;Acc:HGNC:9833]
ENSG00000080986.12	NDC80	protein_coding	1614.03	-0.859901	6.04187e-06	0.00010563	35.8906	NDC80, kinetochore complex component [Source:HGNC Symbol;Acc:HGNC:16909]
ENSG00000081181.7	ARG2	protein_coding	64.1451	1.20709	0.00170075	0.00895707	3.09463	arginase 2 [Source:HGNC Symbol;Acc:HGNC:664]
ENSG00000081320.10	STK17B	protein_coding	4215.54	-0.823564	2.46767e-05	0.000325441	47.3487	serine/threonine kinase 17b [Source:HGNC Symbol;Acc:HGNC:11396]
ENSG00000081377.16	CDC14B	protein_coding	613.317	1.48915	4.47193e-09	2.98951e-07	7.27042	cell division cycle 14B [Source:HGNC Symbol;Acc:HGNC:1719]
ENSG00000081386.12	ZNF510	protein_coding	894.177	1.25928	7.26377e-06	0.000122689	18.3922	zinc finger protein 510 [Source:HGNC Symbol;Acc:HGNC:29161]
ENSG00000081692.12	JMJD4	protein_coding	529.284	0.967669	7.18663e-05	0.000758972	13.2165	jumonji domain containing 4 [Source:HGNC Symbol;Acc:HGNC:25724]
ENSG00000081760.16	AACS	protein_coding	4810.12	-0.687404	0.000115485	0.0011041	23.4173	acetoacetyl-CoA synthetase [Source:HGNC Symbol;Acc:HGNC:21298]
ENSG00000081842.17	PCDHA6	protein_coding	369.418	0.66917	0.00474346	0.0195937	5.89907	protocadherin alpha 6 [Source:HGNC Symbol;Acc:HGNC:8672]
ENSG00000081853.14	PCDHGA2	protein_coding	550.108	0.592416	0.00663911	0.0253588	7.85478	protocadherin gamma subfamily A, 2 [Source:HGNC Symbol;Acc:HGNC:8700]
ENSG00000082258.12	CCNT2	protein_coding	4175.76	-0.60728	0.00280096	0.0131731	33.0437	cyclin T2 [Source:HGNC Symbol;Acc:HGNC:1600]
ENSG00000082482.13	KCNK2	protein_coding	536.147	0.932704	0.000301187	0.00231809	16.109	potassium two pore domain channel subfamily K member 2 [Source:HGNC Symbol;Acc:HGNC:6277]
ENSG00000082684.14	SEMA5B	protein_coding	2492.15	1.5767	1.34152e-09	1.08365e-07	51.897	semaphorin 5B [Source:HGNC Symbol;Acc:HGNC:10737]
ENSG00000083290.19	ULK2	protein_coding	1026.53	0.655533	0.00443415	0.0187058	10.7759	unc-51 like autophagy activating kinase 2 [Source:HGNC Symbol;Acc:HGNC:13480]
ENSG00000083312.17	TNPO1	protein_coding	6463.1	-0.642748	0.000339649	0.00254234	43.5255	transportin 1 [Source:HGNC Symbol;Acc:HGNC:6401]
ENSG00000083457.11	ITGAE	protein_coding	501.346	-0.72386	0.00200064	0.0101357	5.46648	integrin subunit alpha E [Source:HGNC Symbol;Acc:HGNC:6147]
ENSG00000083635.7	NUFIP1	protein_coding	625.771	-0.660761	0.0138071	0.0446784	14.8381	nuclear FMR1 interacting protein 1 [Source:HGNC Symbol;Acc:HGNC:8057]
ENSG00000083750.12	RRAGB	protein_coding	794.624	0.958508	1.36959e-05	0.000202513	32.4186	Ras related GTP binding B [Source:HGNC Symbol;Acc:HGNC:19901]
ENSG00000083807.9	SLC27A5	protein_coding	299.619	-0.7489	0.00592421	0.0233131	2.77902	solute carrier family 27 member 5 [Source:HGNC Symbol;Acc:HGNC:10999]
ENSG00000083812.11	ZNF324	protein_coding	445.106	0.688567	0.00479822	0.0197731	8.09634	zinc finger protein 324 [Source:HGNC Symbol;Acc:HGNC:14096]
ENSG00000083817.8	ZNF416	protein_coding	202.794	1.12677	0.00015029	0.00135517	8.96406	zinc finger protein 416 [Source:HGNC Symbol;Acc:HGNC:20645]
ENSG00000083857.13	FAT1	protein_coding	510.17	0.900219	0.000174989	0.0015266	3.40597	FAT atypical cadherin 1 [Source:HGNC Symbol;Acc:HGNC:3595]
ENSG00000083896.12	YTHDC1	protein_coding	8829.17	-0.618731	0.00190838	0.00974461	89.6265	YTH domain containing 1 [Source:HGNC Symbol;Acc:HGNC:30626]
ENSG00000084070.11	SMAP2	protein_coding	4137.05	-1.13291	1.63552e-08	8.62129e-07	97.727	small ArfGAP2 [Source:HGNC Symbol;Acc:HGNC:25082]
ENSG00000084444.13	FAM234B	protein_coding	3111.01	-1.51863	1.40582e-14	5.70438e-12	39.1339	family with sequence similarity 234 member B [Source:HGNC Symbol;Acc:HGNC:29288]
ENSG00000084731.13	KIF3C	protein_coding	1158.53	0.797992	5.84878e-05	0.000644252	18.2558	kinesin family member 3C [Source:HGNC Symbol;Acc:HGNC:6321]
ENSG00000084774.13	CAD	protein_coding	815.51	1.14145	1.63283e-06	3.70958e-05	11.1966	carbamoyl-phosphate synthetase 2, aspartate transcarbamylase, and dihydroorotase [Source:HGNC Symbol;Acc:HGNC:1424]
ENSG00000085231.13	AK6	protein_coding	1004	-0.723874	0.00108416	0.00628034	33.6018	adenylate kinase 6 [Source:HGNC Symbol;Acc:HGNC:49151]
ENSG00000085449.14	WDFY1	protein_coding	6720.94	-0.897708	5.5554e-06	9.91111e-05	95.2006	WD repeat and FYVE domain containing 1 [Source:HGNC Symbol;Acc:HGNC:20451]
ENSG00000085491.15	SLC25A24	protein_coding	14311.5	0.586821	0.00767063	0.0284276	223.449	solute carrier family 25 member 24 [Source:HGNC Symbol;Acc:HGNC:20662]
ENSG00000085840.12	ORC1	protein_coding	1066.21	-0.976307	7.45973e-06	0.000125288	26.7127	origin recognition complex subunit 1 [Source:HGNC Symbol;Acc:HGNC:8487]
ENSG00000085872.14	CHERP	protein_coding	4791.74	-0.688262	0.00142304	0.00783009	59.5185	calcium homeostasis endoplasmic reticulum protein [Source:HGNC Symbol;Acc:HGNC:16930]
ENSG00000085978.21	ATG16L1	protein_coding	4621.39	-0.848771	2.62309e-06	5.37179e-05	64.8855	autophagy related 16 like 1 [Source:HGNC Symbol;Acc:HGNC:21498]
ENSG00000085982.13	USP40	protein_coding	2917	0.739162	0.000257204	0.00205669	33.7358	ubiquitin specific peptidase 40 [Source:HGNC Symbol;Acc:HGNC:20069]
ENSG00000085998.13	POMGNT1	protein_coding	1421.37	0.659151	0.000681372	0.00437543	23.5284	protein O-linked mannose N-acetylglucosaminyltransferase 1 (beta 1,2-) [Source:HGNC Symbol;Acc:HGNC:19139]
ENSG00000085999.11	RAD54L	protein_coding	763.834	-0.69518	0.00142638	0.00784598	16.7849	RAD54 like [Source:HGNC Symbol;Acc:HGNC:9826]
ENSG00000086061.15	DNAJA1	protein_coding	2732.22	0.677574	0.000405604	0.00291834	105.141	DnaJ heat shock protein family (Hsp40) member A1 [Source:HGNC Symbol;Acc:HGNC:5229]
ENSG00000086065.13	CHMP5	protein_coding	5958.51	-0.723065	0.000195429	0.00164892	235.241	charged multivesicular body protein 5 [Source:HGNC Symbol;Acc:HGNC:26942]
ENSG00000086189.9	DIMT1	protein_coding	1234.47	-0.612884	0.00231873	0.0113203	24.0378	DIM1 dimethyladenosine transferase 1 homolog [Source:HGNC Symbol;Acc:HGNC:30217]
ENSG00000086475.14	SEPHS1	protein_coding	4287.17	-0.659828	0.000302599	0.00232486	81.6861	selenophosphate synthetase 1 [Source:HGNC Symbol;Acc:HGNC:19685]
ENSG00000086589.11	RBM22	protein_coding	3066.38	-0.601216	0.00217072	0.0107691	58.4225	RNA binding motif protein 22 [Source:HGNC Symbol;Acc:HGNC:25503]
ENSG00000086827.8	ZW10	protein_coding	553.742	0.875837	6.31666e-05	0.000683643	19.8861	zw10 kinetochore protein [Source:HGNC Symbol;Acc:HGNC:13194]
ENSG00000087074.7	PPP1R15A	protein_coding	10695.6	-0.700663	0.0047408	0.0195874	287.788	protein phosphatase 1 regulatory subunit 15A [Source:HGNC Symbol;Acc:HGNC:14375]
ENSG00000087510.6	TFAP2C	protein_coding	7320.19	-0.59664	0.00349762	0.0156198	176.405	transcription factor AP-2 gamma [Source:HGNC Symbol;Acc:HGNC:11744]
ENSG00000087586.17	AURKA	protein_coding	11449.1	-0.988516	3.40214e-07	1.02799e-05	353.21	aurora kinase A [Source:HGNC Symbol;Acc:HGNC:11393]
ENSG00000088002.11	SULT2B1	protein_coding	2282.36	-1.21714	1.00946e-07	3.77964e-06	71.4088	sulfotransferase family 2B member 1 [Source:HGNC Symbol;Acc:HGNC:11459]
ENSG00000088038.17	CNOT3	protein_coding	6481.51	-0.914685	8.94379e-05	0.00090517	82.924	CCR4-NOT transcription complex subunit 3 [Source:HGNC Symbol;Acc:HGNC:7879]
ENSG00000088179.8	PTPN4	protein_coding	1049.56	0.985628	3.93072e-05	0.000468785	9.05344	protein tyrosine phosphatase, non-receptor type 4 [Source:HGNC Symbol;Acc:HGNC:9656]
ENSG00000088325.15	TPX2	protein_coding	13242.3	-0.750394	3.78226e-05	0.000453167	294.385	TPX2, microtubule nucleation factor [Source:HGNC Symbol;Acc:HGNC:1249]
ENSG00000088451.10	TGDS	protein_coding	748.908	-0.756153	0.0015564	0.00836858	22.6439	TDP-glucose 4,6-dehydratase [Source:HGNC Symbol;Acc:HGNC:20324]
ENSG00000088727.12	KIF9	protein_coding	124.985	0.946627	0.00268768	0.0127431	2.4256	kinesin family member 9 [Source:HGNC Symbol;Acc:HGNC:16666]
ENSG00000088766.11	CRLS1	protein_coding	1655.6	-0.622319	0.00334718	0.0150675	22.1825	cardiolipin synthase 1 [Source:HGNC Symbol;Acc:HGNC:16148]
ENSG00000088812.17	ATRN	protein_coding	5917.69	-0.630631	0.000473024	0.0032908	53.6633	attractin [Source:HGNC Symbol;Acc:HGNC:885]
ENSG00000088854.12	C20orf194	protein_coding	1053.47	1.13859	3.88201e-06	7.41877e-05	14.3749	chromosome 20 open reading frame 194 [Source:HGNC Symbol;Acc:HGNC:17721]
ENSG00000088970.15	KIZ	protein_coding	918.677	0.713111	0.000405457	0.00291834	17.8293	kizuna centrosomal protein [Source:HGNC Symbol;Acc:HGNC:15865]
ENSG00000089050.14	RBBP9	protein_coding	1556.32	0.60405	0.00231088	0.0112973	40.6802	RB binding protein 9, serine hydrolase [Source:HGNC Symbol;Acc:HGNC:9892]
ENSG00000089091.16	DZANK1	protein_coding	242.615	1.23203	7.52796e-06	0.000126054	4.71958	double zinc ribbon and ankyrin repeat domains 1 [Source:HGNC Symbol;Acc:HGNC:15858]
ENSG00000089639.10	GMIP	protein_coding	981.074	0.599682	0.00806272	0.0295418	25.4076	GEM interacting protein [Source:HGNC Symbol;Acc:HGNC:24852]
ENSG00000089685.14	BIRC5	protein_coding	3729.16	-0.589059	0.00209517	0.0104867	66.8205	baculoviral IAP repeat containing 5 [Source:HGNC Symbol;Acc:HGNC:593]
ENSG00000089692.8	LAG3	protein_coding	75.8045	1.1155	0.00628011	0.0243501	3.39946	lymphocyte activating 3 [Source:HGNC Symbol;Acc:HGNC:6476]
ENSG00000089693.10	MLF2	protein_coding	11898.3	-0.653045	0.000264086	0.00209064	234.537	myeloid leukemia factor 2 [Source:HGNC Symbol;Acc:HGNC:7126]
ENSG00000089723.9	OTUB2	protein_coding	463.574	0.62302	0.00617864	0.0240529	10.764	OTU deubiquitinase, ubiquitin aldehyde binding 2 [Source:HGNC Symbol;Acc:HGNC:20351]
ENSG00000089775.11	ZBTB25	protein_coding	8998.8	-1.02161	4.84204e-06	8.95622e-05	61.9063	zinc finger and BTB domain containing 25 [Source:HGNC Symbol;Acc:HGNC:13112]
ENSG00000089847.12	ANKRD24	protein_coding	586.43	0.79034	0.00027165	0.0021331	14.1072	ankyrin repeat domain 24 [Source:HGNC Symbol;Acc:HGNC:29424]
ENSG00000089902.9	RCOR1	protein_coding	11241.5	-0.756744	4.15454e-05	0.000491447	137.173	REST corepressor 1 [Source:HGNC Symbol;Acc:HGNC:17441]
ENSG00000090061.17	CCNK	protein_coding	6238.35	-0.808125	0.000101349	0.000999622	58.3639	cyclin K [Source:HGNC Symbol;Acc:HGNC:1596]
ENSG00000090432.6	MUL1	protein_coding	931.705	-0.62025	0.00315929	0.0144188	26.4579	mitochondrial E3 ubiquitin protein ligase 1 [Source:HGNC Symbol;Acc:HGNC:25762]
ENSG00000090565.15	RAB11FIP3	protein_coding	2884.61	0.593272	0.0037859	0.0165688	46.1177	RAB11 family interacting protein 3 [Source:HGNC Symbol;Acc:HGNC:17224]
ENSG00000090612.20	ZNF268	protein_coding	902.212	1.43001	5.48921e-07	1.53241e-05	8.33673	zinc finger protein 268 [Source:HGNC Symbol;Acc:HGNC:13061]
ENSG00000090776.5	EFNB1	protein_coding	1488.59	-1.10505	4.18799e-07	1.21787e-05	44.5946	ephrin B1 [Source:HGNC Symbol;Acc:HGNC:3226]
ENSG00000090905.17	TNRC6A	protein_coding	8274.31	-0.606873	0.000563055	0.00377128	49.7711	trinucleotide repeat containing 6A [Source:HGNC Symbol;Acc:HGNC:11969]
ENSG00000091009.7	RBM27	protein_coding	1971.32	-0.944036	2.85554e-06	5.72026e-05	22.4968	RNA binding motif protein 27 [Source:HGNC Symbol;Acc:HGNC:29243]
ENSG00000091136.13	LAMB1	protein_coding	269.21	2.18734	1.92483e-15	1.01771e-12	4.88192	laminin subunit beta 1 [Source:HGNC Symbol;Acc:HGNC:6486]
ENSG00000091409.14	ITGA6	protein_coding	915.263	1.10497	8.75772e-07	2.221e-05	16.4357	integrin subunit alpha 6 [Source:HGNC Symbol;Acc:HGNC:6142]
ENSG00000091542.8	ALKBH5	protein_coding	10996.9	-0.730133	9.7307e-05	0.000967415	252.832	alkB homolog 5, RNA demethylase [Source:HGNC Symbol;Acc:HGNC:25996]
ENSG00000091622.15	PITPNM3	protein_coding	480.631	1.09447	3.69714e-06	7.08875e-05	5.3687	PITPNM family member 3 [Source:HGNC Symbol;Acc:HGNC:21043]
ENSG00000091651.8	ORC6	protein_coding	605.828	-0.818641	0.000204283	0.00171115	10.4283	origin recognition complex subunit 6 [Source:HGNC Symbol;Acc:HGNC:17151]
ENSG00000091947.9	TMEM101	protein_coding	3547.11	-0.750106	0.000547411	0.00369006	90.5567	transmembrane protein 101 [Source:HGNC Symbol;Acc:HGNC:28653]
ENSG00000092096.14	SLC22A17	protein_coding	601.031	-0.749553	0.00222831	0.0109674	11.0505	solute carrier family 22 member 17 [Source:HGNC Symbol;Acc:HGNC:23095]
ENSG00000092199.17	HNRNPC	protein_coding	35685.6	-0.613384	0.00375311	0.016474	364.793	heterogeneous nuclear ribonucleoprotein C (C1/C2) [Source:HGNC Symbol;Acc:HGNC:5035]
ENSG00000092421.16	SEMA6A	protein_coding	500.771	0.987864	0.00144061	0.0079068	5.51695	semaphorin 6A [Source:HGNC Symbol;Acc:HGNC:10738]
ENSG00000092621.11	PHGDH	protein_coding	888.485	0.718569	0.000381768	0.00278125	16.1011	phosphoglycerate dehydrogenase [Source:HGNC Symbol;Acc:HGNC:8923]
ENSG00000092847.11	AGO1	protein_coding	2689.71	0.675484	0.00310183	0.0142086	19.2059	argonaute 1, RISC catalytic component [Source:HGNC Symbol;Acc:HGNC:3262]
ENSG00000092871.16	RFFL	protein_coding	1140.74	-1.02225	2.21229e-06	4.73619e-05	10.6527	ring finger and FYVE like domain containing E3 ubiquitin protein ligase [Source:HGNC Symbol;Acc:HGNC:24821]
ENSG00000092964.16	DPYSL2	protein_coding	3534.11	-0.597284	0.0017333	0.00910924	41.8667	dihydropyrimidinase like 2 [Source:HGNC Symbol;Acc:HGNC:3014]
ENSG00000094631.18	HDAC6	protein_coding	3884.29	-0.732202	0.000228454	0.00187282	27.2485	histone deacetylase 6 [Source:HGNC Symbol;Acc:HGNC:14064]
ENSG00000094755.16	GABRP	protein_coding	130.042	3.24062	4.74556e-19	5.91433e-16	4.13473	gamma-aminobutyric acid type A receptor pi subunit [Source:HGNC Symbol;Acc:HGNC:4089]
ENSG00000095015.5	MAP3K1	protein_coding	8062.33	-0.705152	7.24756e-05	0.000763158	79.3968	mitogen-activated protein kinase kinase kinase 1 [Source:HGNC Symbol;Acc:HGNC:6848]
ENSG00000095059.15	DHPS	protein_coding	12797.8	-0.855501	6.97439e-05	0.000741103	332.723	deoxyhypusine synthase [Source:HGNC Symbol;Acc:HGNC:2869]
ENSG00000095203.14	EPB41L4B	protein_coding	6699.48	-1.10384	6.46939e-08	2.64351e-06	66.9917	erythrocyte membrane protein band 4.1 like 4B [Source:HGNC Symbol;Acc:HGNC:19818]
ENSG00000095209.11	TMEM38B	protein_coding	1093.29	-0.914326	6.16156e-05	0.000670661	19.4201	transmembrane protein 38B [Source:HGNC Symbol;Acc:HGNC:25535]
ENSG00000095383.19	TBC1D2	protein_coding	4388.91	-0.660563	0.00038	0.00277416	95.2474	TBC1 domain family member 2 [Source:HGNC Symbol;Acc:HGNC:18026]
ENSG00000095564.13	BTAF1	protein_coding	7855.11	-0.682774	0.000472742	0.00329015	74.2089	B-TFIID TATA-box binding protein associated factor 1 [Source:HGNC Symbol;Acc:HGNC:17307]
ENSG00000095574.11	IKZF5	protein_coding	2146.55	-0.650352	0.00460999	0.0192244	34.3759	IKAROS family zinc finger 5 [Source:HGNC Symbol;Acc:HGNC:14283]
ENSG00000095739.10	BAMBI	protein_coding	13422.1	-0.676248	0.000470784	0.00328045	413.93	BMP and activin membrane bound inhibitor [Source:HGNC Symbol;Acc:HGNC:30251]
ENSG00000096006.11	CRISP3	protein_coding	303.132	0.719639	0.00418243	0.0178598	14.2258	cysteine rich secretory protein 3 [Source:HGNC Symbol;Acc:HGNC:16904]
ENSG00000096060.14	FKBP5	protein_coding	422.774	0.65209	0.00460991	0.0192244	11.3826	FK506 binding protein 5 [Source:HGNC Symbol;Acc:HGNC:3721]
ENSG00000096092.5	TMEM14A	protein_coding	1170.72	-0.624193	0.00182623	0.00944958	84.2196	transmembrane protein 14A [Source:HGNC Symbol;Acc:HGNC:21076]
ENSG00000097046.12	CDC7	protein_coding	77.1266	1.24261	0.00158462	0.00847854	3.52223	cell division cycle 7 [Source:HGNC Symbol;Acc:HGNC:1745]
ENSG00000097096.8	SYDE2	protein_coding	2650.25	-0.668391	0.00260753	0.0124477	31.5795	synapse defective Rho GTPase homolog 2 [Source:HGNC Symbol;Acc:HGNC:25841]
ENSG00000099194.5	SCD	protein_coding	322702	-1.5825	1.48785e-12	3.50812e-10	5637.02	stearoyl-CoA desaturase [Source:HGNC Symbol;Acc:HGNC:10571]
ENSG00000099203.6	TMED1	protein_coding	2500.76	-0.762445	7.77244e-05	0.000807362	120.54	transmembrane p24 trafficking protein 1 [Source:HGNC Symbol;Acc:HGNC:17291]
ENSG00000099256.18	PRTFDC1	protein_coding	51.7703	1.33567	0.00134093	0.00745114	3.05692	phosphoribosyl transferase domain containing 1 [Source:HGNC Symbol;Acc:HGNC:23333]
ENSG00000099260.10	PALMD	protein_coding	156.423	2.80324	7.44131e-15	3.41674e-12	3.51611	palmdelphin [Source:HGNC Symbol;Acc:HGNC:15846]
ENSG00000099338.22	CATSPERG	protein_coding	1303.36	0.665065	0.00089224	0.00538305	15.2728	cation channel sperm associated auxiliary subunit gamma [Source:HGNC Symbol;Acc:HGNC:25243]
ENSG00000099795.6	NDUFB7	protein_coding	5043.98	-0.62731	0.00205227	0.0103253	684.06	NADH:ubiquinone oxidoreductase subunit B7 [Source:HGNC Symbol;Acc:HGNC:7702]
ENSG00000099804.8	CDC34	protein_coding	3329.61	-0.791868	0.000111112	0.00107525	127.388	cell division cycle 34 [Source:HGNC Symbol;Acc:HGNC:1734]
ENSG00000099821.13	POLRMT	protein_coding	2561.15	-0.857399	3.24287e-05	0.00039987	37.9465	RNA polymerase mitochondrial [Source:HGNC Symbol;Acc:HGNC:9200]
ENSG00000099849.14	RASSF7	protein_coding	4853.01	-0.626828	0.0032731	0.0148297	145.546	Ras association domain family member 7 [Source:HGNC Symbol;Acc:HGNC:1166]
ENSG00000099860.8	GADD45B	protein_coding	8371.9	-1.3895	5.32013e-07	1.48998e-05	414.931	growth arrest and DNA damage inducible beta [Source:HGNC Symbol;Acc:HGNC:4096]
ENSG00000099889.13	ARVCF	protein_coding	2048.05	-0.901119	1.20752e-05	0.000184328	27.8679	ARVCF, delta catenin family member [Source:HGNC Symbol;Acc:HGNC:728]
ENSG00000099917.17	MED15	protein_coding	5332.13	-0.640188	0.00117684	0.0067235	35.8122	mediator complex subunit 15 [Source:HGNC Symbol;Acc:HGNC:14248]
ENSG00000099942.12	CRKL	protein_coding	12631.1	-1.16262	4.62445e-10	4.29188e-08	188.297	CRK like proto-oncogene, adaptor protein [Source:HGNC Symbol;Acc:HGNC:2363]
ENSG00000099949.18	LZTR1	protein_coding	370.852	0.937854	0.000473819	0.0032937	6.02841	leucine zipper like transcription regulator 1 [Source:HGNC Symbol;Acc:HGNC:6742]
ENSG00000099977.13	DDT	protein_coding	3592.36	-0.903809	2.31654e-05	0.000309724	163.824	D-dopachrome tautomerase [Source:HGNC Symbol;Acc:HGNC:2732]
ENSG00000099991.16	CABIN1	protein_coding	8318.05	-0.777706	9.10995e-05	0.000918788	65.6759	calcineurin binding protein 1 [Source:HGNC Symbol;Acc:HGNC:24187]
ENSG00000099992.15	TBC1D10A	protein_coding	1252.87	-1.10881	1.08535e-06	2.67474e-05	15.0181	TBC1 domain family member 10A [Source:HGNC Symbol;Acc:HGNC:23609]
ENSG00000100028.11	SNRPD3	protein_coding	3718.8	-0.649936	0.00461775	0.0192522	114.75	small nuclear ribonucleoprotein D3 polypeptide [Source:HGNC Symbol;Acc:HGNC:11160]
ENSG00000100031.18	GGT1	protein_coding	38.1473	1.25225	0.00456557	0.0190985	1.11414	gamma-glutamyltransferase 1 [Source:HGNC Symbol;Acc:HGNC:4250]
ENSG00000100036.12	SLC35E4	protein_coding	160.468	-1.19461	7.92365e-05	0.000815057	2.45065	solute carrier family 35 member E4 [Source:HGNC Symbol;Acc:HGNC:17058]
ENSG00000100058.12	CRYBB2P1	transcribed_unprocessed_pseudogene	1027.35	-1.07075	4.6664e-05	0.000535611	14.8277	crystallin beta B2 pseudogene 1 [Source:HGNC Symbol;Acc:HGNC:2399]
ENSG00000100060.17	MFNG	protein_coding	32.0733	1.20705	0.0122691	0.0407058	1.57724	MFNG O-fucosylpeptide 3-beta-N-acetylglucosaminyltransferase [Source:HGNC Symbol;Acc:HGNC:7038]
ENSG00000100068.11	LRP5L	protein_coding	227.855	-0.726644	0.0127503	0.0419513	4.0312	LDL receptor related protein 5 like [Source:HGNC Symbol;Acc:HGNC:25323]
ENSG00000100092.20	SH3BP1	protein_coding	610.633	-0.890499	0.000138985	0.00127674	7.59699	SH3 domain binding protein 1 [Source:HGNC Symbol;Acc:HGNC:10824]
ENSG00000100106.19	TRIOBP	protein_coding	2836.34	0.603067	0.00097769	0.00577871	22.5046	TRIO and F-actin binding protein [Source:HGNC Symbol;Acc:HGNC:17009]
ENSG00000100138.13	SNU13	protein_coding	3427.86	-0.658636	0.00251644	0.0120855	93.84	small nuclear ribonucleoprotein 13 [Source:HGNC Symbol;Acc:HGNC:7819]
ENSG00000100151.15	PICK1	protein_coding	863.947	-0.653093	0.00484268	0.0199079	14.9093	protein interacting with PRKCA 1 [Source:HGNC Symbol;Acc:HGNC:9394]
ENSG00000100207.18	TCF20	protein_coding	2436.14	-0.781043	0.000490722	0.00338424	25.4594	transcription factor 20 [Source:HGNC Symbol;Acc:HGNC:11631]
ENSG00000100216.5	TOMM22	protein_coding	787.005	1.92296	4.72865e-20	7.5005e-17	46.2219	translocase of outer mitochondrial membrane 22 [Source:HGNC Symbol;Acc:HGNC:18002]
ENSG00000100226.15	GTPBP1	protein_coding	2394.55	-1.04328	1.12352e-06	2.7649e-05	23.7289	GTP binding protein 1 [Source:HGNC Symbol;Acc:HGNC:4669]
ENSG00000100227.17	POLDIP3	protein_coding	4505.76	-0.72919	0.000241043	0.00195173	89.4311	DNA polymerase delta interacting protein 3 [Source:HGNC Symbol;Acc:HGNC:23782]
ENSG00000100228.12	RAB36	protein_coding	196.66	1.40328	1.76781e-05	0.000249755	6.75719	RAB36, member RAS oncogene family [Source:HGNC Symbol;Acc:HGNC:9775]
ENSG00000100258.17	LMF2	protein_coding	711.009	0.628123	0.002857	0.0133608	24.0973	lipase maturation factor 2 [Source:HGNC Symbol;Acc:HGNC:25096]
ENSG00000100292.16	HMOX1	protein_coding	3735.03	1.03113	4.72954e-08	2.04767e-06	165.899	heme oxygenase 1 [Source:HGNC Symbol;Acc:HGNC:5013]
ENSG00000100296.13	THOC5	protein_coding	1917.65	0.721923	0.000168636	0.00148006	24.2898	THO complex 5 [Source:HGNC Symbol;Acc:HGNC:19074]
ENSG00000100299.17	ARSA	protein_coding	302.24	-0.638312	0.00964041	0.0338579	7.75284	arylsulfatase A [Source:HGNC Symbol;Acc:HGNC:713]
ENSG00000100302.6	RASD2	protein_coding	118.851	0.968783	0.00296132	0.013733	3.88173	RASD family member 2 [Source:HGNC Symbol;Acc:HGNC:18229]
ENSG00000100330.15	MTMR3	protein_coding	5942.81	-0.744459	0.000137062	0.00126198	61.491	myotubularin related protein 3 [Source:HGNC Symbol;Acc:HGNC:7451]
ENSG00000100350.14	FOXRED2	protein_coding	943.427	0.765373	0.000880509	0.00532659	17.9896	FAD dependent oxidoreductase domain containing 2 [Source:HGNC Symbol;Acc:HGNC:26264]
ENSG00000100353.17	EIF3D	protein_coding	13759.4	-0.607506	0.00217531	0.0107783	232.647	eukaryotic translation initiation factor 3 subunit D [Source:HGNC Symbol;Acc:HGNC:3278]
ENSG00000100360.14	IFT27	protein_coding	527.14	1.30721	6.95799e-08	2.80377e-06	8.07308	intraflagellar transport 27 [Source:HGNC Symbol;Acc:HGNC:18626]
ENSG00000100387.8	RBX1	protein_coding	1425.53	-0.870159	7.21001e-05	0.000760123	36.3225	ring-box 1 [Source:HGNC Symbol;Acc:HGNC:9928]
ENSG00000100401.19	RANGAP1	protein_coding	3048.09	-0.701378	0.000189134	0.00161686	44.4756	Ran GTPase activating protein 1 [Source:HGNC Symbol;Acc:HGNC:9854]
ENSG00000100413.16	POLR3H	protein_coding	904.01	1.46676	1.86615e-08	9.4653e-07	18.2425	RNA polymerase III subunit H [Source:HGNC Symbol;Acc:HGNC:30349]
ENSG00000100416.12	TRMU	protein_coding	1935.35	-0.719991	0.000317091	0.00242233	16.5058	tRNA 5-methylaminomethyl-2-thiouridylate methyltransferase [Source:HGNC Symbol;Acc:HGNC:25481]
ENSG00000100422.13	CERK	protein_coding	1189.21	-0.78127	0.000836047	0.00514182	23.6705	ceramide kinase [Source:HGNC Symbol;Acc:HGNC:19256]
ENSG00000100425.18	BRD1	protein_coding	2549.06	-0.68071	0.000541171	0.00366551	30.8061	bromodomain containing 1 [Source:HGNC Symbol;Acc:HGNC:1102]
ENSG00000100441.9	KHNYN	protein_coding	8806.21	0.854625	8.92609e-05	0.000904428	112.757	KH and NYN domain containing [Source:HGNC Symbol;Acc:HGNC:20166]
ENSG00000100478.14	AP4S1	protein_coding	224.15	0.945572	0.000956914	0.00567899	3.60075	adaptor related protein complex 4 subunit sigma 1 [Source:HGNC Symbol;Acc:HGNC:575]
ENSG00000100483.13	VCPKMT	protein_coding	878.761	-0.895782	0.000216866	0.00180013	35.5788	valosin containing protein lysine methyltransferase [Source:HGNC Symbol;Acc:HGNC:20352]
ENSG00000100504.16	PYGL	protein_coding	13094.5	-0.672705	0.000378735	0.00276608	205.683	glycogen phosphorylase L [Source:HGNC Symbol;Acc:HGNC:9725]
ENSG00000100519.11	PSMC6	protein_coding	5516.12	-0.882263	0.000263023	0.00208317	63.9601	proteasome 26S subunit, ATPase 6 [Source:HGNC Symbol;Acc:HGNC:9553]
ENSG00000100526.19	CDKN3	protein_coding	2436.18	-0.614469	0.00103356	0.00604747	104.392	cyclin dependent kinase inhibitor 3 [Source:HGNC Symbol;Acc:HGNC:1791]
ENSG00000100558.8	PLEK2	protein_coding	187.224	0.90929	0.00243587	0.0117825	13.1882	pleckstrin 2 [Source:HGNC Symbol;Acc:HGNC:19238]
ENSG00000100583.4	SAMD15	protein_coding	91.9555	2.0104	1.07084e-06	2.65021e-05	6.47062	sterile alpha motif domain containing 15 [Source:HGNC Symbol;Acc:HGNC:18631]
ENSG00000100591.7	AHSA1	protein_coding	2273.73	0.620593	0.000835489	0.00514182	74.9405	activator of HSP90 ATPase activity 1 [Source:HGNC Symbol;Acc:HGNC:1189]
ENSG00000100593.17	ISM2	protein_coding	1119.11	-2.50867	3.98264e-33	2.3163e-29	26.7954	isthmin 2 [Source:HGNC Symbol;Acc:HGNC:23176]
ENSG00000100603.13	SNW1	protein_coding	6919.8	-0.640288	0.00258733	0.0123647	213.245	SNW domain containing 1 [Source:HGNC Symbol;Acc:HGNC:16696]
ENSG00000100644.16	HIF1A	protein_coding	13704	-1.26947	1.22025e-09	9.99578e-08	229.421	hypoxia inducible factor 1 subunit alpha [Source:HGNC Symbol;Acc:HGNC:4910]
ENSG00000100664.10	EIF5	protein_coding	9880.86	0.848212	5.70698e-06	0.000100887	133.663	eukaryotic translation initiation factor 5 [Source:HGNC Symbol;Acc:HGNC:3299]
ENSG00000100749.7	VRK1	protein_coding	826.264	-0.684552	0.000859487	0.00523615	22.8351	VRK serine/threonine kinase 1 [Source:HGNC Symbol;Acc:HGNC:12718]
ENSG00000100802.14	C14orf93	protein_coding	1049.74	0.686078	0.000625863	0.00409605	24.0564	chromosome 14 open reading frame 93 [Source:HGNC Symbol;Acc:HGNC:20162]
ENSG00000100811.10	YY1	protein_coding	13330.7	-0.694143	0.000581261	0.00386946	111.681	YY1 transcription factor [Source:HGNC Symbol;Acc:HGNC:12856]
ENSG00000100813.14	ACIN1	protein_coding	20680.6	-0.62337	0.0038065	0.0166414	172.169	apoptotic chromatin condensation inducer 1 [Source:HGNC Symbol;Acc:HGNC:17066]
ENSG00000100836.10	PABPN1	protein_coding	4290.57	-0.710821	0.00182056	0.00943706	87.9947	poly(A) binding protein nuclear 1 [Source:HGNC Symbol;Acc:HGNC:8565]
ENSG00000100883.11	SRP54	protein_coding	9345.02	-0.72134	0.000148264	0.00133898	170.293	signal recognition particle 54 [Source:HGNC Symbol;Acc:HGNC:11301]
ENSG00000100902.10	PSMA6	protein_coding	704.454	-1.3413	9.51337e-06	0.000152564	11.6752	proteasome subunit alpha 6 [Source:HGNC Symbol;Acc:HGNC:9535]
ENSG00000100906.10	NFKBIA	protein_coding	14375.6	-0.596149	0.0105786	0.0363125	474.518	NFKB inhibitor alpha [Source:HGNC Symbol;Acc:HGNC:7797]
ENSG00000100918.12	REC8	protein_coding	1046.96	0.643649	0.00238027	0.0115621	27.2716	REC8 meiotic recombination protein [Source:HGNC Symbol;Acc:HGNC:16879]
ENSG00000100968.13	NFATC4	protein_coding	364.399	0.855341	0.000451416	0.00317593	4.84783	nuclear factor of activated T cells 4 [Source:HGNC Symbol;Acc:HGNC:7778]
ENSG00000101000.5	PROCR	protein_coding	151.518	-1.49202	5.75038e-06	0.000101449	8.85822	protein C receptor [Source:HGNC Symbol;Acc:HGNC:9452]
ENSG00000101004.14	NINL	protein_coding	1228.48	0.805216	0.000177399	0.00154223	21.9107	ninein like [Source:HGNC Symbol;Acc:HGNC:29163]
ENSG00000101019.21	UQCC1	protein_coding	935.66	0.808504	7.46589e-05	0.000782239	14.8943	ubiquinol-cytochrome c reductase complex assembly factor 1 [Source:HGNC Symbol;Acc:HGNC:15891]
ENSG00000101052.12	IFT52	protein_coding	577.014	1.04434	1.69925e-06	3.83089e-05	25.7214	intraflagellar transport 52 [Source:HGNC Symbol;Acc:HGNC:15901]
ENSG00000101057.15	MYBL2	protein_coding	2511.89	-0.766978	0.000219929	0.00181606	70.5412	MYB proto-oncogene like 2 [Source:HGNC Symbol;Acc:HGNC:7548]
ENSG00000101084.16	C20orf24	protein_coding	299.299	-0.623184	0.0144246	0.0461968	13.8208	RAB5 interacting factor [Source:HGNC Symbol;Acc:HGNC:15870]
ENSG00000101096.19	NFATC2	protein_coding	1426.45	0.776029	0.000291945	0.00226696	18.4646	nuclear factor of activated T cells 2 [Source:HGNC Symbol;Acc:HGNC:7776]
ENSG00000101109.11	STK4	protein_coding	4566.28	-0.753952	0.000227096	0.00186377	37.311	serine/threonine kinase 4 [Source:HGNC Symbol;Acc:HGNC:11408]
ENSG00000101138.11	CSTF1	protein_coding	6392.91	-0.739008	5.68262e-05	0.000631934	98.6122	cleavage stimulation factor subunit 1 [Source:HGNC Symbol;Acc:HGNC:2483]
ENSG00000101152.10	DNAJC5	protein_coding	16932.5	-1.03351	3.66554e-08	1.65262e-06	245.438	DnaJ heat shock protein family (Hsp40) member C5 [Source:HGNC Symbol;Acc:HGNC:16235]
ENSG00000101158.12	NELFCD	protein_coding	21086.1	-0.721727	0.000466976	0.00326018	254.045	negative elongation factor complex member C/D [Source:HGNC Symbol;Acc:HGNC:15934]
ENSG00000101187.15	SLCO4A1	protein_coding	7405.54	-1.28506	2.11814e-10	2.22634e-08	157.624	solute carrier organic anion transporter family member 4A1 [Source:HGNC Symbol;Acc:HGNC:10953]
ENSG00000101189.6	MRGBP	protein_coding	12228.6	-1.09937	1.87184e-06	4.16581e-05	388.599	MRG domain binding protein [Source:HGNC Symbol;Acc:HGNC:15866]
ENSG00000101199.12	ARFGAP1	protein_coding	9345.45	-0.650888	0.00146053	0.00798852	103.878	ADP ribosylation factor GTPase activating protein 1 [Source:HGNC Symbol;Acc:HGNC:15852]
ENSG00000101222.12	SPEF1	protein_coding	34.8113	1.1076	0.013788	0.0446392	2.15115	sperm flagellar 1 [Source:HGNC Symbol;Acc:HGNC:15874]
ENSG00000101224.17	CDC25B	protein_coding	12001	-0.778381	1.52796e-05	0.000222723	245.104	cell division cycle 25B [Source:HGNC Symbol;Acc:HGNC:1726]
ENSG00000101266.16	CSNK2A1	protein_coding	10456.5	-0.77307	0.00011465	0.00109671	126.067	casein kinase 2 alpha 1 [Source:HGNC Symbol;Acc:HGNC:2457]
ENSG00000101333.16	PLCB4	protein_coding	1004.86	0.674066	0.0013031	0.00726869	15.7531	phospholipase C beta 4 [Source:HGNC Symbol;Acc:HGNC:9059]
ENSG00000101347.8	SAMHD1	protein_coding	217.731	1.20015	6.93218e-05	0.000737966	4.84148	SAM and HD domain containing deoxynucleoside triphosphate triphosphohydrolase 1 [Source:HGNC Symbol;Acc:HGNC:15925]
ENSG00000101384.11	JAG1	protein_coding	4703.45	-1.5721	9.74023e-12	1.66615e-09	51.6785	jagged 1 [Source:HGNC Symbol;Acc:HGNC:6188]
ENSG00000101400.5	SNTA1	protein_coding	1346.75	-0.704942	0.00029674	0.00229398	44.6192	syntrophin alpha 1 [Source:HGNC Symbol;Acc:HGNC:11167]
ENSG00000101439.8	CST3	protein_coding	9137.16	-0.775878	0.000120336	0.00113986	185.911	cystatin C [Source:HGNC Symbol;Acc:HGNC:2475]
ENSG00000101447.13	FAM83D	protein_coding	5362.94	-1.24791	2.07644e-09	1.54169e-07	181.753	family with sequence similarity 83 member D [Source:HGNC Symbol;Acc:HGNC:16122]
ENSG00000101558.13	VAPA	protein_coding	7370.04	-0.771234	0.000216993	0.00180033	47.6897	VAMP associated protein A [Source:HGNC Symbol;Acc:HGNC:12648]
ENSG00000101577.9	LPIN2	protein_coding	3034.49	-0.644324	0.000755675	0.0047565	33.4769	lipin 2 [Source:HGNC Symbol;Acc:HGNC:14450]
ENSG00000101608.12	MYL12A	protein_coding	30896.8	-0.802319	4.37224e-06	8.19016e-05	744.036	myosin light chain 12A [Source:HGNC Symbol;Acc:HGNC:16701]
ENSG00000101624.10	CEP76	protein_coding	524.959	-0.769149	0.00132057	0.00735206	6.44075	centrosomal protein 76 [Source:HGNC Symbol;Acc:HGNC:25727]
ENSG00000101665.8	SMAD7	protein_coding	1164.65	-0.848617	0.00012782	0.00120033	24.6504	SMAD family member 7 [Source:HGNC Symbol;Acc:HGNC:6773]
ENSG00000101782.14	RIOK3	protein_coding	10305	-1.18216	1.4335e-08	7.82882e-07	163.828	RIO kinase 3 [Source:HGNC Symbol;Acc:HGNC:11451]
ENSG00000101843.18	PSMD10	protein_coding	3555.59	-0.703699	0.000240437	0.00194851	102.864	proteasome 26S subunit, non-ATPase 10 [Source:HGNC Symbol;Acc:HGNC:9555]
ENSG00000101849.15	TBL1X	protein_coding	6214.71	1.2072	1.60008e-06	3.6638e-05	102.669	transducin beta like 1 X-linked [Source:HGNC Symbol;Acc:HGNC:11585]
ENSG00000101850.12	GPR143	protein_coding	240.79	1.40294	5.88995e-07	1.62865e-05	11.66	G protein-coupled receptor 143 [Source:HGNC Symbol;Acc:HGNC:20145]
ENSG00000101856.9	PGRMC1	protein_coding	7541.55	-0.638282	0.000821076	0.00507479	275.89	progesterone receptor membrane component 1 [Source:HGNC Symbol;Acc:HGNC:16090]
ENSG00000101871.14	MID1	protein_coding	169.18	0.792423	0.0112043	0.0379672	2.4243	midline 1 [Source:HGNC Symbol;Acc:HGNC:7095]
ENSG00000101882.9	NKAP	protein_coding	2587.67	-0.609155	0.00329044	0.0148966	23.5822	NFKB activating protein [Source:HGNC Symbol;Acc:HGNC:29873]
ENSG00000101986.11	ABCD1	protein_coding	470.641	0.785842	0.000880744	0.00532659	11.7048	ATP binding cassette subfamily D member 1 [Source:HGNC Symbol;Acc:HGNC:61]
ENSG00000101997.12	CCDC22	protein_coding	2656.47	-0.746745	0.000298342	0.00230025	78.2094	coiled-coil domain containing 22 [Source:HGNC Symbol;Acc:HGNC:28909]
ENSG00000102078.15	SLC25A14	protein_coding	744.245	0.654594	0.00289966	0.0135168	27.3917	solute carrier family 25 member 14 [Source:HGNC Symbol;Acc:HGNC:10984]
ENSG00000102096.9	PIM2	protein_coding	1907.31	-1.19926	5.20351e-08	2.17724e-06	58.5004	Pim-2 proto-oncogene, serine/threonine kinase [Source:HGNC Symbol;Acc:HGNC:8987]
ENSG00000102098.17	SCML2	protein_coding	163.824	-1.23361	2.25768e-05	0.000303716	3.44881	Scm polycomb group protein like 2 [Source:HGNC Symbol;Acc:HGNC:10581]
ENSG00000102109.8	PCSK1N	protein_coding	2366.6	-0.786566	4.43846e-05	0.000517663	127.135	proprotein convertase subtilisin/kexin type 1 inhibitor [Source:HGNC Symbol;Acc:HGNC:17301]
ENSG00000102119.10	EMD	protein_coding	8607.19	-0.896361	5.9184e-05	0.000649461	351.706	emerin [Source:HGNC Symbol;Acc:HGNC:3331]
ENSG00000102125.15	TAZ	protein_coding	2009.68	-0.694434	0.000361332	0.00266351	30.8156	tafazzin [Source:HGNC Symbol;Acc:HGNC:11577]
ENSG00000102144.13	PGK1	protein_coding	240009	-0.736883	7.51225e-05	0.000786285	3165.77	phosphoglycerate kinase 1 [Source:HGNC Symbol;Acc:HGNC:8896]
ENSG00000102174.8	PHEX	protein_coding	119.991	2.42234	4.95174e-11	6.44761e-09	3.17496	phosphate regulating endopeptidase homolog X-linked [Source:HGNC Symbol;Acc:HGNC:8918]
ENSG00000102226.9	USP11	protein_coding	3224.37	0.950312	1.23615e-06	2.98318e-05	69.7118	ubiquitin specific peptidase 11 [Source:HGNC Symbol;Acc:HGNC:12609]
ENSG00000102265.11	TIMP1	protein_coding	7034.23	-0.692978	0.000420407	0.00300872	329.957	TIMP metallopeptidase inhibitor 1 [Source:HGNC Symbol;Acc:HGNC:11820]
ENSG00000102312.20	PORCN	protein_coding	150.819	-0.900032	0.00469161	0.0194532	3.96946	porcupine O-acyltransferase [Source:HGNC Symbol;Acc:HGNC:17652]
ENSG00000102349.15	KLF8	protein_coding	274.531	1.21398	7.68248e-05	0.000800262	3.78672	Kruppel like factor 8 [Source:HGNC Symbol;Acc:HGNC:6351]
ENSG00000102409.9	BEX4	protein_coding	296.588	0.682691	0.00891032	0.0318788	21.9772	brain expressed X-linked 4 [Source:HGNC Symbol;Acc:HGNC:25475]
ENSG00000102554.13	KLF5	protein_coding	3192.89	-0.726248	0.000600356	0.00396481	61.5572	Kruppel like factor 5 [Source:HGNC Symbol;Acc:HGNC:6349]
ENSG00000102572.14	STK24	protein_coding	6685.9	-0.797406	0.000244232	0.0019756	44.4783	serine/threonine kinase 24 [Source:HGNC Symbol;Acc:HGNC:11403]
ENSG00000102580.14	DNAJC3	protein_coding	3185.53	-0.887679	4.16882e-05	0.000492802	45.5373	DnaJ heat shock protein family (Hsp40) member C3 [Source:HGNC Symbol;Acc:HGNC:9439]
ENSG00000102595.18	UGGT2	protein_coding	442.795	0.67496	0.0075427	0.0280147	7.25069	UDP-glucose glycoprotein glucosyltransferase 2 [Source:HGNC Symbol;Acc:HGNC:15664]
ENSG00000102606.17	ARHGEF7	protein_coding	5012.27	-0.903305	6.32708e-06	0.000109363	32.9234	Rho guanine nucleotide exchange factor 7 [Source:HGNC Symbol;Acc:HGNC:15607]
ENSG00000102683.7	SGCG	protein_coding	383.833	0.691962	0.00403546	0.0174327	23.8434	sarcoglycan gamma [Source:HGNC Symbol;Acc:HGNC:10809]
ENSG00000102753.9	KPNA3	protein_coding	1408.92	-0.758308	0.00010856	0.001057	23.7102	karyopherin subunit alpha 3 [Source:HGNC Symbol;Acc:HGNC:6396]
ENSG00000102760.12	RGCC	protein_coding	289.847	0.857296	0.00210757	0.0105264	29.3841	regulator of cell cycle [Source:HGNC Symbol;Acc:HGNC:20369]
ENSG00000102796.10	DHRS12	protein_coding	561.655	0.798049	0.00055143	0.00370622	17.0853	dehydrogenase/reductase 12 [Source:HGNC Symbol;Acc:HGNC:25832]
ENSG00000102870.5	ZNF629	protein_coding	1610.72	1.45283	1.30793e-08	7.26776e-07	33.2868	zinc finger protein 629 [Source:HGNC Symbol;Acc:HGNC:29008]
ENSG00000102878.16	HSF4	protein_coding	7570.23	-0.590258	0.0132082	0.0431109	177.22	heat shock transcription factor 4 [Source:HGNC Symbol;Acc:HGNC:5227]
ENSG00000103018.16	CYB5B	protein_coding	4864.82	-0.710267	0.000205402	0.00171887	49.989	cytochrome b5 type B [Source:HGNC Symbol;Acc:HGNC:24374]
ENSG00000103042.8	SLC38A7	protein_coding	287.639	1.1708	0.000395108	0.00285815	4.91529	solute carrier family 38 member 7 [Source:HGNC Symbol;Acc:HGNC:25582]
ENSG00000103047.7	TANGO6	protein_coding	83.7564	1.00701	0.00552617	0.0221216	1.60403	transport and golgi organization 6 homolog [Source:HGNC Symbol;Acc:HGNC:25749]
ENSG00000103089.8	FA2H	protein_coding	548.465	-1.12651	6.7057e-07	1.80002e-05	13.483	fatty acid 2-hydroxylase [Source:HGNC Symbol;Acc:HGNC:21197]
ENSG00000103121.8	CMC2	protein_coding	3020.17	-1.22143	1.14924e-07	4.16881e-06	21.1896	C-X9-C motif containing 2 [Source:HGNC Symbol;Acc:HGNC:24447]
ENSG00000103145.10	HCFC1R1	protein_coding	4286.74	-0.793644	0.000191611	0.00163164	230.787	host cell factor C1 regulator 1 [Source:HGNC Symbol;Acc:HGNC:21198]
ENSG00000103150.5	MLYCD	protein_coding	643.725	0.868365	0.000460574	0.00322358	4.43687	malonyl-CoA decarboxylase [Source:HGNC Symbol;Acc:HGNC:7150]
ENSG00000103152.11	MPG	protein_coding	4276.06	-0.603713	0.00168867	0.00892278	177.4	N-methylpurine DNA glycosylase [Source:HGNC Symbol;Acc:HGNC:7211]
ENSG00000103160.11	HSDL1	protein_coding	10269.3	-1.29179	8.508e-12	1.53039e-09	184.58	hydroxysteroid dehydrogenase like 1 [Source:HGNC Symbol;Acc:HGNC:16475]
ENSG00000103194.15	USP10	protein_coding	9531.62	-0.617676	0.00150607	0.00815326	131.861	ubiquitin specific peptidase 10 [Source:HGNC Symbol;Acc:HGNC:12608]
ENSG00000103275.18	UBE2I	protein_coding	10492.9	-0.645232	0.00121934	0.00689183	78.147	ubiquitin conjugating enzyme E2 I [Source:HGNC Symbol;Acc:HGNC:12485]
ENSG00000103326.10	CAPN15	protein_coding	4781.9	-0.80429	2.02513e-05	0.000278005	45.2425	calpain 15 [Source:HGNC Symbol;Acc:HGNC:11182]
ENSG00000103489.11	XYLT1	protein_coding	1535.69	-0.850711	3.57216e-05	0.000433429	12.5561	xylosyltransferase 1 [Source:HGNC Symbol;Acc:HGNC:15516]
ENSG00000103494.12	RPGRIP1L	protein_coding	285.777	0.711809	0.00683537	0.02591	2.57663	RPGRIP1 like [Source:HGNC Symbol;Acc:HGNC:29168]
ENSG00000103544.14	C16orf62	protein_coding	845.969	0.846411	0.000374911	0.0027462	9.93785	VPS35 endosomal protein sorting factor like [Source:HGNC Symbol;Acc:HGNC:24641]
ENSG00000103642.11	LACTB	protein_coding	1978.35	-0.676188	0.000908064	0.00545214	35.655	lactamase beta [Source:HGNC Symbol;Acc:HGNC:16468]
ENSG00000103653.16	CSK	protein_coding	2377.88	0.737206	9.25291e-05	0.000928377	52.6027	C-terminal Src kinase [Source:HGNC Symbol;Acc:HGNC:2444]
ENSG00000103723.12	AP3B2	protein_coding	199.121	1.00551	0.00037753	0.00276075	2.53197	adaptor related protein complex 3 subunit beta 2 [Source:HGNC Symbol;Acc:HGNC:567]
ENSG00000103852.12	TTC23	protein_coding	1024.19	0.928168	5.21409e-05	0.00058922	17.6981	tetratricopeptide repeat domain 23 [Source:HGNC Symbol;Acc:HGNC:25730]
ENSG00000103876.11	FAH	protein_coding	2069.85	-0.607913	0.00183879	0.00949882	21.5397	fumarylacetoacetate hydrolase [Source:HGNC Symbol;Acc:HGNC:3579]
ENSG00000103995.13	CEP152	protein_coding	1746.24	-1.00264	3.39034e-06	6.60946e-05	16.8318	centrosomal protein 152 [Source:HGNC Symbol;Acc:HGNC:29298]
ENSG00000104140.6	RHOV	protein_coding	3790.08	-1.41582	3.48305e-09	2.46041e-07	214.921	ras homolog family member V [Source:HGNC Symbol;Acc:HGNC:18313]
ENSG00000104331.8	IMPAD1	protein_coding	15298.6	-1.48494	9.78611e-16	5.88786e-13	178.133	inositol monophosphatase domain containing 1 [Source:HGNC Symbol;Acc:HGNC:26019]
ENSG00000104341.16	LAPTM4B	protein_coding	9963.43	-0.715441	9.76749e-05	0.000969967	227.3	lysosomal protein transmembrane 4 beta [Source:HGNC Symbol;Acc:HGNC:13646]
ENSG00000104356.10	POP1	protein_coding	395.005	0.92163	0.000139688	0.00128008	9.20835	POP1 homolog, ribonuclease P/MRP subunit [Source:HGNC Symbol;Acc:HGNC:30129]
ENSG00000104361.9	NIPAL2	protein_coding	4058.4	0.870595	1.09137e-05	0.000170324	79.7202	NIPA like domain containing 2 [Source:HGNC Symbol;Acc:HGNC:25854]
ENSG00000104369.4	JPH1	protein_coding	323.475	0.778273	0.00549926	0.0220324	7.72049	junctophilin 1 [Source:HGNC Symbol;Acc:HGNC:14201]
ENSG00000104381.12	GDAP1	protein_coding	212.795	1.31883	7.92812e-06	0.000130747	7.47643	ganglioside induced differentiation associated protein 1 [Source:HGNC Symbol;Acc:HGNC:15968]
ENSG00000104419.14	NDRG1	protein_coding	206514	-0.695056	0.000265112	0.00209591	1550.6	N-myc downstream regulated 1 [Source:HGNC Symbol;Acc:HGNC:7679]
ENSG00000104447.11	TRPS1	protein_coding	8076.04	0.621053	0.000689611	0.00441553	74.7549	transcriptional repressor GATA binding 1 [Source:HGNC Symbol;Acc:HGNC:12340]
ENSG00000104490.17	NCALD	protein_coding	128.72	1.06875	0.000689303	0.00441518	1.89809	neurocalcin delta [Source:HGNC Symbol;Acc:HGNC:7655]
ENSG00000104517.12	UBR5	protein_coding	45903	-0.914503	2.76734e-06	5.57558e-05	264.028	ubiquitin protein ligase E3 component n-recognin 5 [Source:HGNC Symbol;Acc:HGNC:16806]
ENSG00000104549.11	SQLE	protein_coding	9027.79	-0.784392	4.13108e-05	0.00049	152.899	squalene epoxidase [Source:HGNC Symbol;Acc:HGNC:11279]
ENSG00000104611.11	SH2D4A	protein_coding	1168.79	0.586485	0.0145673	0.0465684	26.9019	SH2 domain containing 4A [Source:HGNC Symbol;Acc:HGNC:26102]
ENSG00000104626.14	ERI1	protein_coding	857.205	-0.602046	0.00531184	0.021444	9.29673	exoribonuclease 1 [Source:HGNC Symbol;Acc:HGNC:23994]
ENSG00000104689.9	TNFRSF10A	protein_coding	1061.46	-0.732387	0.000297348	0.00229665	27.7752	TNF receptor superfamily member 10a [Source:HGNC Symbol;Acc:HGNC:11904]
ENSG00000104695.12	PPP2CB	protein_coding	2815.9	-0.7959	0.000135607	0.00125482	47.1953	protein phosphatase 2 catalytic subunit beta [Source:HGNC Symbol;Acc:HGNC:9300]
ENSG00000104808.7	DHDH	protein_coding	93.348	-1.38498	0.000108053	0.00105266	7.5357	dihydrodiol dehydrogenase [Source:HGNC Symbol;Acc:HGNC:17887]
ENSG00000104824.16	HNRNPL	protein_coding	11692.1	-1.12867	2.17452e-06	4.67253e-05	156.938	heterogeneous nuclear ribonucleoprotein L [Source:HGNC Symbol;Acc:HGNC:5045]
ENSG00000104856.13	RELB	protein_coding	456.779	-0.632872	0.00530933	0.0214388	11.0502	RELB proto-oncogene, NF-kB subunit [Source:HGNC Symbol;Acc:HGNC:9956]
ENSG00000104859.14	CLASRP	protein_coding	4582.89	-0.726409	0.00103106	0.00604096	72.4992	CLK4 associating serine/arginine rich protein [Source:HGNC Symbol;Acc:HGNC:17731]
ENSG00000104872.10	PIH1D1	protein_coding	3856.71	-0.719124	0.000775482	0.00485142	88.4203	PIH1 domain containing 1 [Source:HGNC Symbol;Acc:HGNC:26075]
ENSG00000104885.17	DOT1L	protein_coding	5262.22	-1.01095	7.55395e-06	0.000126368	39.6173	DOT1 like histone lysine methyltransferase [Source:HGNC Symbol;Acc:HGNC:24948]
ENSG00000104964.14	AES	protein_coding	5162.09	0.687857	0.000198351	0.00167028	94.616	amino-terminal enhancer of split [Source:HGNC Symbol;Acc:HGNC:307]
ENSG00000104973.14	MED25	protein_coding	2970.1	-0.750404	0.000644938	0.00419414	37.96	mediator complex subunit 25 [Source:HGNC Symbol;Acc:HGNC:28845]
ENSG00000104979.8	C19orf53	protein_coding	4928.4	-0.938677	4.48671e-05	0.000520506	350.179	chromosome 19 open reading frame 53 [Source:HGNC Symbol;Acc:HGNC:24991]
ENSG00000105058.11	FAM32A	protein_coding	3227.05	0.754184	3.25042e-05	0.000400518	172.299	family with sequence similarity 32 member A [Source:HGNC Symbol;Acc:HGNC:24563]
ENSG00000105085.10	MED26	protein_coding	1044.7	-1.09788	0.00010092	0.000996517	19.1795	mediator complex subunit 26 [Source:HGNC Symbol;Acc:HGNC:2376]
ENSG00000105141.5	CASP14	protein_coding	154.082	1.77412	1.83001e-08	9.33627e-07	6.58553	caspase 14 [Source:HGNC Symbol;Acc:HGNC:1502]
ENSG00000105193.8	RPS16	protein_coding	47165	-0.734744	0.000266657	0.00210594	1345.28	ribosomal protein S16 [Source:HGNC Symbol;Acc:HGNC:10396]
ENSG00000105202.7	FBL	protein_coding	25886.5	-0.888369	2.48734e-05	0.000326923	936.119	fibrillarin [Source:HGNC Symbol;Acc:HGNC:3599]
ENSG00000105204.13	DYRK1B	protein_coding	2364.36	0.721913	0.000191905	0.00163334	76.6316	dual specificity tyrosine phosphorylation regulated kinase 1B [Source:HGNC Symbol;Acc:HGNC:3092]
ENSG00000105220.14	GPI	protein_coding	227694	-1.37488	4.32046e-09	2.92184e-07	2309	glucose-6-phosphate isomerase [Source:HGNC Symbol;Acc:HGNC:4458]
ENSG00000105221.16	AKT2	protein_coding	10153.7	-0.624871	0.000679178	0.00436475	47.7057	AKT serine/threonine kinase 2 [Source:HGNC Symbol;Acc:HGNC:392]
ENSG00000105229.6	PIAS4	protein_coding	2146.94	-0.6928	0.000245722	0.00198581	44.112	protein inhibitor of activated STAT 4 [Source:HGNC Symbol;Acc:HGNC:17002]
ENSG00000105290.11	APLP1	protein_coding	727.503	-0.881799	4.6691e-05	0.000535611	14.9041	amyloid beta precursor like protein 1 [Source:HGNC Symbol;Acc:HGNC:597]
ENSG00000105325.13	FZR1	protein_coding	3832.17	-0.711512	0.000235469	0.00191894	46.8504	fizzy and cell division cycle 20 related 1 [Source:HGNC Symbol;Acc:HGNC:24824]
ENSG00000105339.10	DENND3	protein_coding	2406.97	-0.896036	4.41171e-05	0.000516268	13.1676	DENN domain containing 3 [Source:HGNC Symbol;Acc:HGNC:29134]
ENSG00000105372.6	RPS19	protein_coding	93907.5	-0.632513	0.00211169	0.0105331	1812.23	ribosomal protein S19 [Source:HGNC Symbol;Acc:HGNC:10402]
ENSG00000105388.15	CEACAM5	protein_coding	11658.3	-0.654463	0.000405548	0.00291834	260.111	carcinoembryonic antigen related cell adhesion molecule 5 [Source:HGNC Symbol;Acc:HGNC:1817]
ENSG00000105393.15	BABAM1	protein_coding	844.641	-0.697466	0.00331253	0.0149578	25.1513	BRISC and BRCA1 A complex member 1 [Source:HGNC Symbol;Acc:HGNC:25008]
ENSG00000105419.17	MEIS3	protein_coding	2053.35	0.826084	1.8668e-05	0.000260993	44.3381	Meis homeobox 3 [Source:HGNC Symbol;Acc:HGNC:29537]
ENSG00000105429.12	MEGF8	protein_coding	2331.07	0.832823	0.00212148	0.0105728	21.7908	multiple EGF like domains 8 [Source:HGNC Symbol;Acc:HGNC:3233]
ENSG00000105472.12	CLEC11A	protein_coding	325.825	-0.950215	0.000285326	0.0022205	17.9664	C-type lectin domain containing 11A [Source:HGNC Symbol;Acc:HGNC:10576]
ENSG00000105486.13	LIG1	protein_coding	7229.3	-0.704454	0.0027102	0.012829	89.5804	DNA ligase 1 [Source:HGNC Symbol;Acc:HGNC:6598]
ENSG00000105516.10	DBP	protein_coding	5397.65	-0.803002	0.000195488	0.00164892	63.5164	D-box binding PAR bZIP transcription factor [Source:HGNC Symbol;Acc:HGNC:2697]
ENSG00000105583.9	WDR83OS	protein_coding	4175.99	-0.642535	0.00208719	0.0104638	115.467	WD repeat domain 83 opposite strand [Source:HGNC Symbol;Acc:HGNC:30203]
ENSG00000105607.12	GCDH	protein_coding	533.375	0.72822	0.00130279	0.00726869	13.1913	glutaryl-CoA dehydrogenase [Source:HGNC Symbol;Acc:HGNC:4189]
ENSG00000105613.9	MAST1	protein_coding	1892.8	-1.39504	1.42646e-08	7.82672e-07	26.4509	microtubule associated serine/threonine kinase 1 [Source:HGNC Symbol;Acc:HGNC:19034]
ENSG00000105649.9	RAB3A	protein_coding	1991.06	-1.70464	1.37194e-10	1.54436e-08	116.317	RAB3A, member RAS oncogene family [Source:HGNC Symbol;Acc:HGNC:9777]
ENSG00000105656.12	ELL	protein_coding	3630.56	-1.28578	4.1134e-09	2.81453e-07	64.956	elongation factor for RNA polymerase II [Source:HGNC Symbol;Acc:HGNC:23114]
ENSG00000105668.7	UPK1A	protein_coding	1017.09	-0.64503	0.00347674	0.0155464	55.7522	uroplakin 1A [Source:HGNC Symbol;Acc:HGNC:12577]
ENSG00000105698.15	USF2	protein_coding	5234.82	-0.64102	0.000780543	0.00487784	73.2839	upstream transcription factor 2, c-fos interacting [Source:HGNC Symbol;Acc:HGNC:12594]
ENSG00000105700.10	KXD1	protein_coding	7545.22	-0.709871	0.000396385	0.00286382	134.98	KxDL motif containing 1 [Source:HGNC Symbol;Acc:HGNC:28420]
ENSG00000105701.15	FKBP8	protein_coding	31664.5	-0.727404	0.000414553	0.00297414	816.418	FK506 binding protein 8 [Source:HGNC Symbol;Acc:HGNC:3724]
ENSG00000105711.10	SCN1B	protein_coding	1153.32	-0.731072	0.00019538	0.00164892	19.6025	sodium voltage-gated channel beta subunit 1 [Source:HGNC Symbol;Acc:HGNC:10586]
ENSG00000105750.14	ZNF85	protein_coding	564.88	1.16689	7.09719e-07	1.87194e-05	13.7578	zinc finger protein 85 [Source:HGNC Symbol;Acc:HGNC:13160]
ENSG00000105771.13	SMG9	protein_coding	2912.49	-0.728642	0.000299591	0.00230784	26.8702	SMG9, nonsense mediated mRNA decay factor [Source:HGNC Symbol;Acc:HGNC:25763]
ENSG00000105792.19	CFAP69	protein_coding	469.53	1.01965	8.06154e-06	0.000132571	5.6758	cilia and flagella associated protein 69 [Source:HGNC Symbol;Acc:HGNC:26107]
ENSG00000105821.14	DNAJC2	protein_coding	4606.13	-0.690417	0.00284947	0.0133363	55.5512	DnaJ heat shock protein family (Hsp40) member C2 [Source:HGNC Symbol;Acc:HGNC:13192]
ENSG00000105835.11	NAMPT	protein_coding	13863.3	-1.27891	4.27699e-08	1.875e-06	140.575	nicotinamide phosphoribosyltransferase [Source:HGNC Symbol;Acc:HGNC:30092]
ENSG00000105855.9	ITGB8	protein_coding	402.448	2.56334	5.68814e-21	1.24058e-17	4.15587	integrin subunit beta 8 [Source:HGNC Symbol;Acc:HGNC:6163]
ENSG00000105856.13	HBP1	protein_coding	11331.4	-0.661182	0.000854256	0.0052152	129.421	HMG-box transcription factor 1 [Source:HGNC Symbol;Acc:HGNC:23200]
ENSG00000105948.13	TTC26	protein_coding	334.285	0.71828	0.00601692	0.023581	7.45601	tetratricopeptide repeat domain 26 [Source:HGNC Symbol;Acc:HGNC:21882]
ENSG00000105953.14	OGDH	protein_coding	3283.78	0.589538	0.0147231	0.0469548	63.9319	oxoglutarate dehydrogenase [Source:HGNC Symbol;Acc:HGNC:8124]
ENSG00000105968.18	H2AFV	protein_coding	4822.79	-0.657421	0.000577827	0.00385394	71.0213	H2A histone family member V [Source:HGNC Symbol;Acc:HGNC:20664]
ENSG00000105974.11	CAV1	protein_coding	4205.24	0.812115	7.80673e-05	0.000809339	112.1	caveolin 1 [Source:HGNC Symbol;Acc:HGNC:1527]
ENSG00000105976.14	MET	protein_coding	2406.55	0.590036	0.0118787	0.0396696	35.2355	MET proto-oncogene, receptor tyrosine kinase [Source:HGNC Symbol;Acc:HGNC:7029]
ENSG00000105982.16	RNF32	protein_coding	101.734	1.07999	0.00159454	0.00851695	2.99308	ring finger protein 32 [Source:HGNC Symbol;Acc:HGNC:17118]
ENSG00000105993.14	DNAJB6	protein_coding	3922.21	-0.8206	0.000191297	0.00162976	20.9794	DnaJ heat shock protein family (Hsp40) member B6 [Source:HGNC Symbol;Acc:HGNC:14888]
ENSG00000106009.15	BRAT1	protein_coding	4028.45	-0.589988	0.00615624	0.0240032	45.0573	BRCA1 associated ATM activator 1 [Source:HGNC Symbol;Acc:HGNC:21701]
ENSG00000106025.8	TSPAN12	protein_coding	334.695	0.628754	0.014821	0.0472321	9.73323	tetraspanin 12 [Source:HGNC Symbol;Acc:HGNC:21641]
ENSG00000106031.7	HOXA13	protein_coding	1322.04	-0.906794	1.29448e-05	0.000194707	22.6449	homeobox A13 [Source:HGNC Symbol;Acc:HGNC:5102]
ENSG00000106052.13	TAX1BP1	protein_coding	10205.2	-0.705211	0.000468947	0.00327026	86.788	Tax1 binding protein 1 [Source:HGNC Symbol;Acc:HGNC:11575]
ENSG00000106086.18	PLEKHA8	protein_coding	4091.41	-1.07628	7.53512e-08	3.00166e-06	31.8498	pleckstrin homology domain containing A8 [Source:HGNC Symbol;Acc:HGNC:30037]
ENSG00000106089.11	STX1A	protein_coding	901.239	-0.891093	0.000127108	0.00119486	19.5812	syntaxin 1A [Source:HGNC Symbol;Acc:HGNC:11433]
ENSG00000106105.13	GARS	protein_coding	4987.27	-0.710995	0.000548818	0.00369436	89.0927	glycyl-tRNA synthetase [Source:HGNC Symbol;Acc:HGNC:4162]
ENSG00000106144.19	CASP2	protein_coding	7519.03	-1.20898	1.66455e-11	2.62197e-09	78.7451	caspase 2 [Source:HGNC Symbol;Acc:HGNC:1503]
ENSG00000106153.12	CHCHD2	protein_coding	8287.55	-0.781766	8.31765e-05	0.000851181	545.908	coiled-coil-helix-coiled-coil-helix domain containing 2 [Source:HGNC Symbol;Acc:HGNC:21645]
ENSG00000106211.8	HSPB1	protein_coding	91596.9	-0.877371	7.16216e-06	0.000121208	4220.2	heat shock protein family B (small) member 1 [Source:HGNC Symbol;Acc:HGNC:5246]
ENSG00000106261.16	ZKSCAN1	protein_coding	20628.6	0.638001	0.000604845	0.00398992	196.873	zinc finger with KRAB and SCAN domains 1 [Source:HGNC Symbol;Acc:HGNC:13101]
ENSG00000106268.15	NUDT1	protein_coding	1187.36	-0.776422	0.000330703	0.00248978	44.5364	nudix hydrolase 1 [Source:HGNC Symbol;Acc:HGNC:8048]
ENSG00000106355.9	LSM5	protein_coding	3544.8	-0.606984	0.00209888	0.0104992	52.6671	LSM5 homolog, U6 small nuclear RNA and mRNA degradation associated [Source:HGNC Symbol;Acc:HGNC:17162]
ENSG00000106392.10	C1GALT1	protein_coding	3249.32	-1.029	1.31653e-06	3.12103e-05	34.2026	core 1 synthase, glycoprotein-N-acetylgalactosamine 3-beta-galactosyltransferase 1 [Source:HGNC Symbol;Acc:HGNC:24337]
ENSG00000106443.15	PHF14	protein_coding	2083.65	0.686808	0.000393247	0.00284586	23.7809	PHD finger protein 14 [Source:HGNC Symbol;Acc:HGNC:22203]
ENSG00000106459.14	NRF1	protein_coding	1137.94	-0.836697	4.89952e-05	0.000558144	20.602	nuclear respiratory factor 1 [Source:HGNC Symbol;Acc:HGNC:7996]
ENSG00000106477.18	CEP41	protein_coding	448.717	1.09915	9.6987e-05	0.000965334	4.30134	centrosomal protein 41 [Source:HGNC Symbol;Acc:HGNC:12370]
ENSG00000106524.8	ANKMY2	protein_coding	2457.99	-0.684666	0.000273981	0.00214658	64.1333	ankyrin repeat and MYND domain containing 2 [Source:HGNC Symbol;Acc:HGNC:25370]
ENSG00000106537.7	TSPAN13	protein_coding	7474.74	-0.725781	0.000100031	0.000990543	240.503	tetraspanin 13 [Source:HGNC Symbol;Acc:HGNC:21643]
ENSG00000106588.10	PSMA2	protein_coding	602.348	-1.17062	0.000236835	0.00192657	12.1129	proteasome subunit alpha 2 [Source:HGNC Symbol;Acc:HGNC:9531]
ENSG00000106609.16	TMEM248	protein_coding	5628.6	-0.899185	4.93676e-06	9.06311e-05	84.4553	transmembrane protein 248 [Source:HGNC Symbol;Acc:HGNC:25476]
ENSG00000106615.9	RHEB	protein_coding	2681.2	-1.01071	1.84044e-06	4.10116e-05	61.1802	Ras homolog, mTORC1 binding [Source:HGNC Symbol;Acc:HGNC:10011]
ENSG00000106628.10	POLD2	protein_coding	4687.03	-0.721157	0.000124339	0.00117332	91.5639	DNA polymerase delta 2, accessory subunit [Source:HGNC Symbol;Acc:HGNC:9176]
ENSG00000106635.7	BCL7B	protein_coding	1043.33	0.608431	0.00269369	0.0127647	30.1916	BCL tumor suppressor 7B [Source:HGNC Symbol;Acc:HGNC:1005]
ENSG00000106682.14	EIF4H	protein_coding	20028.8	-0.609442	0.0010895	0.00630289	436.272	eukaryotic translation initiation factor 4H [Source:HGNC Symbol;Acc:HGNC:12741]
ENSG00000106692.13	FKTN	protein_coding	2933.94	0.761652	0.00306723	0.014102	37.9036	fukutin [Source:HGNC Symbol;Acc:HGNC:3622]
ENSG00000106780.8	MEGF9	protein_coding	733.159	1.21899	1.53112e-06	3.53374e-05	14.1306	multiple EGF like domains 9 [Source:HGNC Symbol;Acc:HGNC:3234]
ENSG00000106803.9	SEC61B	protein_coding	4004.99	-0.786098	0.000361501	0.00266363	267.309	Sec61 translocon beta subunit [Source:HGNC Symbol;Acc:HGNC:16993]
ENSG00000106976.19	DNM1	protein_coding	2877.29	0.747076	4.46784e-05	0.000519177	34.063	dynamin 1 [Source:HGNC Symbol;Acc:HGNC:2972]
ENSG00000106993.11	CDC37L1	protein_coding	960.765	-0.683132	0.00158101	0.00846957	17.5847	cell division cycle 37 like 1 [Source:HGNC Symbol;Acc:HGNC:17179]
ENSG00000107036.11	RIC1	protein_coding	4468.16	-0.680234	0.000259511	0.00206577	40.4791	RIC1 homolog, RAB6A GEF complex partner 1 [Source:HGNC Symbol;Acc:HGNC:17686]
ENSG00000107099.15	DOCK8	protein_coding	830.721	1.95878	7.38239e-10	6.38648e-08	9.15092	dedicator of cytokinesis 8 [Source:HGNC Symbol;Acc:HGNC:19191]
ENSG00000107159.12	CA9	protein_coding	2795.68	-0.898969	1.02185e-06	2.53617e-05	136.234	carbonic anhydrase 9 [Source:HGNC Symbol;Acc:HGNC:1383]
ENSG00000107165.12	TYRP1	protein_coding	166.607	1.30827	1.69271e-05	0.000241887	5.98123	tyrosinase related protein 1 [Source:HGNC Symbol;Acc:HGNC:12450]
ENSG00000107186.16	MPDZ	protein_coding	1124.6	0.839712	0.000572502	0.00382867	10.1307	multiple PDZ domain crumbs cell polarity complex component [Source:HGNC Symbol;Acc:HGNC:7208]
ENSG00000107201.9	DDX58	protein_coding	530.797	1.02008	2.88831e-05	0.000367044	13.2993	DExD/H-box helicase 58 [Source:HGNC Symbol;Acc:HGNC:19102]
ENSG00000107263.18	RAPGEF1	protein_coding	8417.15	0.746528	8.27275e-05	0.000847083	121.081	Rap guanine nucleotide exchange factor 1 [Source:HGNC Symbol;Acc:HGNC:4568]
ENSG00000107282.7	APBA1	protein_coding	458.426	1.03401	0.000209395	0.00174977	4.35364	amyloid beta precursor protein binding family A member 1 [Source:HGNC Symbol;Acc:HGNC:578]
ENSG00000107331.16	ABCA2	protein_coding	53651.3	-0.744964	0.000218515	0.00181037	354.516	ATP binding cassette subfamily A member 2 [Source:HGNC Symbol;Acc:HGNC:32]
ENSG00000107372.12	ZFAND5	protein_coding	7034.19	-0.709801	0.000617232	0.00405019	131.848	zinc finger AN1-type containing 5 [Source:HGNC Symbol;Acc:HGNC:13008]
ENSG00000107404.17	DVL1	protein_coding	5526.82	-0.621761	0.00141719	0.00780773	100.104	dishevelled segment polarity protein 1 [Source:HGNC Symbol;Acc:HGNC:3084]
ENSG00000107521.18	HPS1	protein_coding	1411.43	0.862842	4.43393e-05	0.000517479	28.3601	HPS1, biogenesis of lysosomal organelles complex 3 subunit 1 [Source:HGNC Symbol;Acc:HGNC:5163]
ENSG00000107796.12	ACTA2	protein_coding	133.735	1.12579	0.000453007	0.00318455	5.31634	actin, alpha 2, smooth muscle, aorta [Source:HGNC Symbol;Acc:HGNC:130]
ENSG00000107854.5	TNKS2	protein_coding	7674.25	-0.586215	0.00147758	0.00806157	90.2548	tankyrase 2 [Source:HGNC Symbol;Acc:HGNC:15677]
ENSG00000107864.14	CPEB3	protein_coding	623.151	-0.874649	0.000133583	0.00124082	6.01322	cytoplasmic polyadenylation element binding protein 3 [Source:HGNC Symbol;Acc:HGNC:21746]
ENSG00000107872.12	FBXL15	protein_coding	1084.44	-0.812674	0.000421816	0.00301757	32.8835	F-box and leucine rich repeat protein 15 [Source:HGNC Symbol;Acc:HGNC:28155]
ENSG00000107929.14	LARP4B	protein_coding	10204.4	-0.616603	0.000760391	0.0047787	64.0924	La ribonucleoprotein domain family member 4B [Source:HGNC Symbol;Acc:HGNC:28987]
ENSG00000107968.9	MAP3K8	protein_coding	1249.94	-0.823656	0.00197176	0.0100288	30.8175	mitogen-activated protein kinase kinase kinase 8 [Source:HGNC Symbol;Acc:HGNC:6860]
ENSG00000108018.15	SORCS1	protein_coding	742.804	1.39331	6.24445e-10	5.55884e-08	9.30626	sortilin related VPS10 domain containing receptor 1 [Source:HGNC Symbol;Acc:HGNC:16697]
ENSG00000108039.17	XPNPEP1	protein_coding	4783.73	-0.859896	6.26718e-06	0.000108806	52.5744	X-prolyl aminopeptidase 1 [Source:HGNC Symbol;Acc:HGNC:12822]
ENSG00000108061.11	SHOC2	protein_coding	3011.69	-0.839709	0.000128926	0.00120811	53.8813	SHOC2, leucine rich repeat scaffold protein [Source:HGNC Symbol;Acc:HGNC:15454]
ENSG00000108106.13	UBE2S	protein_coding	3014.77	-1.33382	9.55939e-11	1.14241e-08	90.3855	ubiquitin conjugating enzyme E2 S [Source:HGNC Symbol;Acc:HGNC:17895]
ENSG00000108187.15	PBLD	protein_coding	205.146	1.62626	3.95251e-08	1.75034e-06	5.28149	phenazine biosynthesis like protein domain containing [Source:HGNC Symbol;Acc:HGNC:23301]
ENSG00000108256.8	NUFIP2	protein_coding	12811.9	-0.591876	0.00238524	0.011583	82.7164	nuclear FMR1 interacting protein 2 [Source:HGNC Symbol;Acc:HGNC:17634]
ENSG00000108312.14	UBTF	protein_coding	4204.26	0.591645	0.00161436	0.00859548	62.3014	upstream binding transcription factor [Source:HGNC Symbol;Acc:HGNC:12511]
ENSG00000108349.14	CASC3	protein_coding	5738.84	-0.79382	0.000270044	0.00212282	69.5656	CASC3, exon junction complex subunit [Source:HGNC Symbol;Acc:HGNC:17040]
ENSG00000108379.9	WNT3	protein_coding	63.9707	1.17176	0.00576688	0.0228502	1.86064	Wnt family member 3 [Source:HGNC Symbol;Acc:HGNC:12782]
ENSG00000108479.11	GALK1	protein_coding	3865.37	-0.744289	6.50901e-05	0.00070018	109.145	galactokinase 1 [Source:HGNC Symbol;Acc:HGNC:4118]
ENSG00000108518.7	PFN1	protein_coding	33496.5	-0.731631	5.01313e-05	0.00056946	1229.42	profilin 1 [Source:HGNC Symbol;Acc:HGNC:8881]
ENSG00000108523.15	RNF167	protein_coding	5736.66	-0.58873	0.0021255	0.0105899	143.133	ring finger protein 167 [Source:HGNC Symbol;Acc:HGNC:24544]
ENSG00000108528.13	SLC25A11	protein_coding	3723.92	-1.28765	1.41434e-10	1.58188e-08	116.18	solute carrier family 25 member 11 [Source:HGNC Symbol;Acc:HGNC:10981]
ENSG00000108551.4	RASD1	protein_coding	1695.11	-1.25211	1.42055e-07	4.91781e-06	107.426	ras related dexamethasone induced 1 [Source:HGNC Symbol;Acc:HGNC:15828]
ENSG00000108578.14	BLMH	protein_coding	367.652	0.641427	0.00680733	0.0258374	7.38247	bleomycin hydrolase [Source:HGNC Symbol;Acc:HGNC:1059]
ENSG00000108582.11	CPD	protein_coding	5092.8	-0.890095	3.24604e-06	6.38851e-05	32.4024	carboxypeptidase D [Source:HGNC Symbol;Acc:HGNC:2301]
ENSG00000108588.13	CCDC47	protein_coding	21015.7	-0.686187	0.000236847	0.00192657	324.676	coiled-coil domain containing 47 [Source:HGNC Symbol;Acc:HGNC:24856]
ENSG00000108590.10	MED31	protein_coding	435	-0.626731	0.0110606	0.0375605	15.2085	mediator complex subunit 31 [Source:HGNC Symbol;Acc:HGNC:24260]
ENSG00000108599.14	AKAP10	protein_coding	6505.66	-1.13974	1.06519e-07	3.96279e-06	112.8	A-kinase anchoring protein 10 [Source:HGNC Symbol;Acc:HGNC:368]
ENSG00000108669.16	CYTH1	protein_coding	5074.57	-0.969329	1.96253e-06	4.30178e-05	51.937	cytohesin 1 [Source:HGNC Symbol;Acc:HGNC:9501]
ENSG00000108799.12	EZH1	protein_coding	4612.95	-0.765533	0.000713511	0.00452868	52.8494	enhancer of zeste 1 polycomb repressive complex 2 subunit [Source:HGNC Symbol;Acc:HGNC:3526]
ENSG00000108813.10	DLX4	protein_coding	197.948	0.720663	0.00978728	0.0342565	6.00089	distal-less homeobox 4 [Source:HGNC Symbol;Acc:HGNC:2917]
ENSG00000108840.15	HDAC5	protein_coding	4291.49	-0.899625	7.88347e-05	0.000814898	46.5593	histone deacetylase 5 [Source:HGNC Symbol;Acc:HGNC:14068]
ENSG00000108846.15	ABCC3	protein_coding	2283.32	-0.6739	0.000553266	0.0037157	20.3064	ATP binding cassette subfamily C member 3 [Source:HGNC Symbol;Acc:HGNC:54]
ENSG00000108932.11	SLC16A6	protein_coding	455.253	1.80933	4.22213e-13	1.15106e-10	15.0814	solute carrier family 16 member 6 [Source:HGNC Symbol;Acc:HGNC:10927]
ENSG00000108947.4	EFNB3	protein_coding	966.534	0.6675	0.000987732	0.00582819	30.507	ephrin B3 [Source:HGNC Symbol;Acc:HGNC:3228]
ENSG00000109046.14	WSB1	protein_coding	128228	-0.677551	0.00417858	0.0178497	1188.53	WD repeat and SOCS box containing 1 [Source:HGNC Symbol;Acc:HGNC:19221]
ENSG00000109103.11	UNC119	protein_coding	2873.67	-1.31229	1.51583e-08	8.13791e-07	51.5889	unc-119 lipid binding chaperone [Source:HGNC Symbol;Acc:HGNC:12565]
ENSG00000109107.13	ALDOC	protein_coding	41913.1	-1.29627	9.73664e-09	5.75344e-07	1288.29	aldolase, fructose-bisphosphate C [Source:HGNC Symbol;Acc:HGNC:418]
ENSG00000109171.14	SLAIN2	protein_coding	2666.64	-0.636296	0.000984384	0.00581041	29.5001	SLAIN motif family member 2 [Source:HGNC Symbol;Acc:HGNC:29282]
ENSG00000109189.12	USP46	protein_coding	1400.32	-0.651865	0.000877672	0.00531908	12.2067	ubiquitin specific peptidase 46 [Source:HGNC Symbol;Acc:HGNC:20075]
ENSG00000109220.10	CHIC2	protein_coding	546.737	-1.12176	1.72131e-05	0.000245194	37.2865	cysteine rich hydrophobic domain 2 [Source:HGNC Symbol;Acc:HGNC:1935]
ENSG00000109265.12	KIAA1211	protein_coding	155.45	1.07925	0.000350246	0.00259525	2.78676	KIAA1211 [Source:HGNC Symbol;Acc:HGNC:29219]
ENSG00000109270.12	LAMTOR3	protein_coding	1974.44	-0.628825	0.00584221	0.0230779	35.8978	late endosomal/lysosomal adaptor, MAPK and MTOR activator 3 [Source:HGNC Symbol;Acc:HGNC:15606]
ENSG00000109332.19	UBE2D3	protein_coding	10252.6	-0.687179	0.000939067	0.00559591	76.4398	ubiquitin conjugating enzyme E2 D3 [Source:HGNC Symbol;Acc:HGNC:12476]
ENSG00000109390.11	NDUFC1	protein_coding	4214.98	-1.08293	8.14559e-06	0.000133701	197.562	NADH:ubiquinone oxidoreductase subunit C1 [Source:HGNC Symbol;Acc:HGNC:7705]
ENSG00000109436.7	TBC1D9	protein_coding	23656.7	0.818705	2.40626e-05	0.000319273	447.6	TBC1 domain family member 9 [Source:HGNC Symbol;Acc:HGNC:21710]
ENSG00000109445.10	ZNF330	protein_coding	2531.6	-0.628956	0.00464709	0.0193382	74.907	zinc finger protein 330 [Source:HGNC Symbol;Acc:HGNC:15462]
ENSG00000109501.13	WFS1	protein_coding	1712.5	-0.888814	5.3629e-06	9.68653e-05	29.5349	wolframin ER transmembrane glycoprotein [Source:HGNC Symbol;Acc:HGNC:12762]
ENSG00000109606.12	DHX15	protein_coding	12634.8	-1.05876	1.88555e-06	4.19097e-05	132.913	DEAH-box helicase 15 [Source:HGNC Symbol;Acc:HGNC:2738]
ENSG00000109654.14	TRIM2	protein_coding	351.554	1.10434	1.10439e-05	0.000171895	4.05678	tripartite motif containing 2 [Source:HGNC Symbol;Acc:HGNC:15974]
ENSG00000109674.3	NEIL3	protein_coding	434.629	-0.670817	0.00407756	0.0175624	12.4027	nei like DNA glycosylase 3 [Source:HGNC Symbol;Acc:HGNC:24573]
ENSG00000109705.7	NKX3-2	protein_coding	85.0299	1.26383	0.00079323	0.00494119	4.25361	NK3 homeobox 2 [Source:HGNC Symbol;Acc:HGNC:951]
ENSG00000109736.14	MFSD10	protein_coding	11008.5	-0.874881	1.46437e-05	0.000214168	270.657	major facilitator superfamily domain containing 10 [Source:HGNC Symbol;Acc:HGNC:16894]
ENSG00000109758.8	HGFAC	protein_coding	86.9675	1.95164	1.09968e-07	4.06509e-06	4.28696	HGF activator [Source:HGNC Symbol;Acc:HGNC:4894]
ENSG00000109762.15	SNX25	protein_coding	561.993	-0.913899	3.07649e-05	0.000385069	10.0412	sorting nexin 25 [Source:HGNC Symbol;Acc:HGNC:21883]
ENSG00000109790.16	KLHL5	protein_coding	1406.6	-0.647877	0.00121704	0.00688998	23.0172	kelch like family member 5 [Source:HGNC Symbol;Acc:HGNC:6356]
ENSG00000109805.9	NCAPG	protein_coding	2717.3	-0.729494	9.35139e-05	0.00093718	41.0109	non-SMC condensin I complex subunit G [Source:HGNC Symbol;Acc:HGNC:24304]
ENSG00000109854.13	HTATIP2	protein_coding	2296.49	0.698762	0.000338462	0.00253672	80.1776	HIV-1 Tat interactive protein 2 [Source:HGNC Symbol;Acc:HGNC:16637]
ENSG00000109920.12	FNBP4	protein_coding	16163.2	-0.604636	0.00159642	0.00852075	146.816	formin binding protein 4 [Source:HGNC Symbol;Acc:HGNC:19752]
ENSG00000109944.10	C11orf63	protein_coding	129.837	1.70736	3.15138e-07	9.68051e-06	3.64213	junctional cadherin complex regulator [Source:HGNC Symbol;Acc:HGNC:26288]
ENSG00000110025.12	SNX15	protein_coding	43.0449	1.20021	0.00640819	0.0247094	1.2416	sorting nexin 15 [Source:HGNC Symbol;Acc:HGNC:14978]
ENSG00000110031.12	LPXN	protein_coding	160.726	1.13175	0.00014686	0.00133251	7.33634	leupaxin [Source:HGNC Symbol;Acc:HGNC:14061]
ENSG00000110057.7	UNC93B1	protein_coding	5173.45	-0.694576	0.000217208	0.00180126	104.663	unc-93 homolog B1, TLR signaling regulator [Source:HGNC Symbol;Acc:HGNC:13481]
ENSG00000110063.8	DCPS	protein_coding	846.606	-0.924148	8.15426e-06	0.000133718	19.8922	decapping enzyme, scavenger [Source:HGNC Symbol;Acc:HGNC:29812]
ENSG00000110080.18	ST3GAL4	protein_coding	4936.54	-0.892983	4.52272e-05	0.000523639	90.1803	ST3 beta-galactoside alpha-2,3-sialyltransferase 4 [Source:HGNC Symbol;Acc:HGNC:10864]
ENSG00000110090.12	CPT1A	protein_coding	16596.1	1.19294	2.57809e-08	1.24261e-06	292.713	carnitine palmitoyltransferase 1A [Source:HGNC Symbol;Acc:HGNC:2328]
ENSG00000110169.10	HPX	protein_coding	79.6537	1.1778	0.00178918	0.00932985	2.86113	hemopexin [Source:HGNC Symbol;Acc:HGNC:5171]
ENSG00000110172.11	CHORDC1	protein_coding	1071.11	-1.3707	3.24077e-07	9.9028e-06	10.1081	cysteine and histidine rich domain containing 1 [Source:HGNC Symbol;Acc:HGNC:14525]
ENSG00000110195.11	FOLR1	protein_coding	24.7553	-1.13476	0.0157517	0.0494753	1.62944	folate receptor 1 [Source:HGNC Symbol;Acc:HGNC:3791]
ENSG00000110318.13	CEP126	protein_coding	195.656	1.36344	4.92697e-06	9.05856e-05	2.85592	centrosomal protein 126 [Source:HGNC Symbol;Acc:HGNC:29264]
ENSG00000110422.11	HIPK3	protein_coding	5374.78	-0.774157	3.44589e-05	0.000420153	58.8338	homeodomain interacting protein kinase 3 [Source:HGNC Symbol;Acc:HGNC:4915]
ENSG00000110435.11	PDHX	protein_coding	2431.1	-0.733806	0.000352083	0.00260634	46.5445	pyruvate dehydrogenase complex component X [Source:HGNC Symbol;Acc:HGNC:21350]
ENSG00000110436.11	SLC1A2	protein_coding	119.042	1.47954	3.01527e-05	0.000379135	1.36684	solute carrier family 1 member 2 [Source:HGNC Symbol;Acc:HGNC:10940]
ENSG00000110442.11	COMMD9	protein_coding	1439.54	0.596849	0.00287952	0.0134408	20.6463	COMM domain containing 9 [Source:HGNC Symbol;Acc:HGNC:25014]
ENSG00000110455.13	ACCS	protein_coding	659.099	1.28723	7.15508e-09	4.41137e-07	14.5397	1-aminocyclopropane-1-carboxylate synthase homolog (inactive) [Source:HGNC Symbol;Acc:HGNC:23989]
ENSG00000110497.14	AMBRA1	protein_coding	3286.59	-0.616927	0.00183713	0.00949756	29.6655	autophagy and beclin 1 regulator 1 [Source:HGNC Symbol;Acc:HGNC:25990]
ENSG00000110628.13	SLC22A18	protein_coding	1302.26	-0.713148	0.00135255	0.00749898	18.6271	solute carrier family 22 member 18 [Source:HGNC Symbol;Acc:HGNC:10964]
ENSG00000110660.14	SLC35F2	protein_coding	846.661	-0.763563	0.00043255	0.00308046	16.5916	solute carrier family 35 member F2 [Source:HGNC Symbol;Acc:HGNC:23615]
ENSG00000110700.6	RPS13	protein_coding	28980.6	-0.598211	0.00365557	0.016127	967.908	ribosomal protein S13 [Source:HGNC Symbol;Acc:HGNC:10386]
ENSG00000110723.11	EXPH5	protein_coding	1268.69	-0.71534	0.000413544	0.00296812	9.92299	exophilin 5 [Source:HGNC Symbol;Acc:HGNC:30578]
ENSG00000110801.13	PSMD9	protein_coding	581.26	-0.860448	0.000562789	0.00377114	5.4108	proteasome 26S subunit, non-ATPase 9 [Source:HGNC Symbol;Acc:HGNC:9567]
ENSG00000110880.10	CORO1C	protein_coding	7965.88	-0.696507	0.000116665	0.00111112	92.1139	coronin 1C [Source:HGNC Symbol;Acc:HGNC:2254]
ENSG00000110955.8	ATP5B	protein_coding	26019.4	-0.646199	0.000465993	0.00325617	820.802	ATP synthase F1 subunit beta [Source:HGNC Symbol;Acc:HGNC:830]
ENSG00000110975.8	SYT10	protein_coding	273.222	0.971654	0.000212982	0.0017755	6.24704	synaptotagmin 10 [Source:HGNC Symbol;Acc:HGNC:19266]
ENSG00000111011.17	RSRC2	protein_coding	8605.91	-1.17929	8.09309e-07	2.09508e-05	90.8871	arginine and serine rich coiled-coil 2 [Source:HGNC Symbol;Acc:HGNC:30559]
ENSG00000111052.7	LIN7A	protein_coding	1381.69	1.45573	1.75702e-11	2.66579e-09	26.1621	lin-7 homolog A, crumbs cell polarity complex component [Source:HGNC Symbol;Acc:HGNC:17787]
ENSG00000111077.17	TNS2	protein_coding	1188.45	0.67901	0.00263815	0.012556	15.9157	tensin 2 [Source:HGNC Symbol;Acc:HGNC:19737]
ENSG00000111224.13	PARP11	protein_coding	511.822	0.838868	0.000576614	0.00385028	8.60899	poly(ADP-ribose) polymerase family member 11 [Source:HGNC Symbol;Acc:HGNC:1186]
ENSG00000111231.8	GPN3	protein_coding	1171.61	-0.822524	0.000105667	0.00103345	33.8105	GPN-loop GTPase 3 [Source:HGNC Symbol;Acc:HGNC:30186]
ENSG00000111247.14	RAD51AP1	protein_coding	647.433	-0.668215	0.00199242	0.0101073	20.7606	RAD51 associated protein 1 [Source:HGNC Symbol;Acc:HGNC:16956]
ENSG00000111276.10	CDKN1B	protein_coding	17340	-0.810423	5.87789e-06	0.000103384	481.889	cyclin dependent kinase inhibitor 1B [Source:HGNC Symbol;Acc:HGNC:1785]
ENSG00000111300.9	NAA25	protein_coding	4251.36	-0.7201	0.00074145	0.00468217	31.9154	N(alpha)-acetyltransferase 25, NatB auxiliary subunit [Source:HGNC Symbol;Acc:HGNC:25783]
ENSG00000111358.13	GTF2H3	protein_coding	1306.69	0.631932	0.00147075	0.00803431	33.8791	general transcription factor IIH subunit 3 [Source:HGNC Symbol;Acc:HGNC:4657]
ENSG00000111412.5	C12orf49	protein_coding	7301.33	-0.762395	2.50013e-05	0.000328059	63.3251	chromosome 12 open reading frame 49 [Source:HGNC Symbol;Acc:HGNC:26128]
ENSG00000111490.12	TBC1D30	protein_coding	2835.67	-0.854378	2.72556e-05	0.000351482	24.1137	TBC1 domain family member 30 [Source:HGNC Symbol;Acc:HGNC:29164]
ENSG00000111540.15	RAB5B	protein_coding	16657.4	-0.791223	4.50752e-05	0.000522226	186.398	RAB5B, member RAS oncogene family [Source:HGNC Symbol;Acc:HGNC:9784]
ENSG00000111596.11	CNOT2	protein_coding	7824.66	-0.779186	0.000111988	0.00108193	42.0392	CCR4-NOT transcription complex subunit 2 [Source:HGNC Symbol;Acc:HGNC:7878]
ENSG00000111639.7	MRPL51	protein_coding	6075.44	-0.815059	0.000162118	0.00143805	309.016	mitochondrial ribosomal protein L51 [Source:HGNC Symbol;Acc:HGNC:14044]
ENSG00000111640.14	GAPDH	protein_coding	3.50886e+06	-0.972487	5.27339e-06	9.55453e-05	93697.7	glyceraldehyde-3-phosphate dehydrogenase [Source:HGNC Symbol;Acc:HGNC:4141]
ENSG00000111653.19	ING4	protein_coding	1460.84	0.688679	0.000702063	0.00447883	55.5486	inhibitor of growth family member 4 [Source:HGNC Symbol;Acc:HGNC:19423]
ENSG00000111665.11	CDCA3	protein_coding	2816.97	-0.882892	2.612e-05	0.000339599	39.0847	cell division cycle associated 3 [Source:HGNC Symbol;Acc:HGNC:14624]
ENSG00000111669.14	TPI1	protein_coding	79712	-0.645012	0.000344446	0.00256614	2131.3	triosephosphate isomerase 1 [Source:HGNC Symbol;Acc:HGNC:12009]
ENSG00000111671.9	SPSB2	protein_coding	290.946	-0.717518	0.011041	0.0375085	9.42205	splA/ryanodine receptor domain and SOCS box containing 2 [Source:HGNC Symbol;Acc:HGNC:29522]
ENSG00000111674.8	ENO2	protein_coding	71083.1	-1.39157	1.24073e-09	1.0116e-07	1530.03	enolase 2 [Source:HGNC Symbol;Acc:HGNC:3353]
ENSG00000111711.9	GOLT1B	protein_coding	2550.26	-0.747782	0.000624986	0.00409293	51.8627	golgi transport 1B [Source:HGNC Symbol;Acc:HGNC:20175]
ENSG00000111775.2	COX6A1	protein_coding	3777.11	-0.870838	5.17434e-05	0.000585106	223.863	cytochrome c oxidase subunit 6A1 [Source:HGNC Symbol;Acc:HGNC:2277]
ENSG00000111790.13	FGFR1OP2	protein_coding	1559.02	-1.01635	1.87262e-05	0.000261597	22.5777	FGFR1 oncogene partner 2 [Source:HGNC Symbol;Acc:HGNC:23098]
ENSG00000111816.7	FRK	protein_coding	704.588	0.774867	0.0039046	0.0169935	5.59554	fyn related Src family tyrosine kinase [Source:HGNC Symbol;Acc:HGNC:3955]
ENSG00000111817.16	DSE	protein_coding	220.966	1.30055	7.86777e-06	0.000130398	1.87718	dermatan sulfate epimerase [Source:HGNC Symbol;Acc:HGNC:21144]
ENSG00000111832.12	RWDD1	protein_coding	1023.15	-0.591598	0.0104618	0.0360034	12.9384	RWD domain containing 1 [Source:HGNC Symbol;Acc:HGNC:20993]
ENSG00000111843.13	TMEM14C	protein_coding	5288.55	-0.663243	0.000516013	0.00352384	292.237	transmembrane protein 14C [Source:HGNC Symbol;Acc:HGNC:20952]
ENSG00000111879.18	FAM184A	protein_coding	80.2404	0.973972	0.00816136	0.0298281	1.33772	family with sequence similarity 184 member A [Source:HGNC Symbol;Acc:HGNC:20991]
ENSG00000111885.6	MAN1A1	protein_coding	5026.18	-0.678686	0.000243032	0.0019668	75.5201	mannosidase alpha class 1A member 1 [Source:HGNC Symbol;Acc:HGNC:6821]
ENSG00000111897.6	SERINC1	protein_coding	16883.6	-0.849383	5.83872e-05	0.00064355	427.511	serine incorporator 1 [Source:HGNC Symbol;Acc:HGNC:13464]
ENSG00000112029.9	FBXO5	protein_coding	2503.01	-1.32965	1.20509e-08	6.7609e-07	60.4129	F-box protein 5 [Source:HGNC Symbol;Acc:HGNC:13584]
ENSG00000112033.13	PPARD	protein_coding	2339.31	-0.622548	0.00100188	0.00589374	40.2265	peroxisome proliferator activated receptor delta [Source:HGNC Symbol;Acc:HGNC:9235]
ENSG00000112110.9	MRPL18	protein_coding	1304.52	-0.62441	0.00452856	0.0189801	69.7335	mitochondrial ribosomal protein L18 [Source:HGNC Symbol;Acc:HGNC:14477]
ENSG00000112118.17	MCM3	protein_coding	1727.57	0.775379	0.000542877	0.00367087	58.3179	minichromosome maintenance complex component 3 [Source:HGNC Symbol;Acc:HGNC:6945]
ENSG00000112167.9	SAYSD1	protein_coding	481.705	1.27313	2.89987e-05	0.000368246	21.1364	SAYSVFN motif domain containing 1 [Source:HGNC Symbol;Acc:HGNC:21025]
ENSG00000112175.7	BMP5	protein_coding	1017.45	1.34345	2.53168e-06	5.25255e-05	36.839	bone morphogenetic protein 5 [Source:HGNC Symbol;Acc:HGNC:1072]
ENSG00000112200.16	ZNF451	protein_coding	3454.15	-0.613756	0.00303176	0.0139794	14.8259	zinc finger protein 451 [Source:HGNC Symbol;Acc:HGNC:21091]
ENSG00000112210.11	RAB23	protein_coding	454.765	-0.721406	0.00186513	0.00958549	13.0171	RAB23, member RAS oncogene family [Source:HGNC Symbol;Acc:HGNC:14263]
ENSG00000112245.9	PTP4A1	protein_coding	23190.6	-0.802196	0.000856104	0.00522101	339.686	protein tyrosine phosphatase type IVA, member 1 [Source:HGNC Symbol;Acc:HGNC:9634]
ENSG00000112249.13	ASCC3	protein_coding	8999.69	-0.690385	0.000258228	0.00206017	54.784	activating signal cointegrator 1 complex subunit 3 [Source:HGNC Symbol;Acc:HGNC:18697]
ENSG00000112294.12	ALDH5A1	protein_coding	1904.43	0.95847	9.04913e-06	0.000146329	37.6721	aldehyde dehydrogenase 5 family member A1 [Source:HGNC Symbol;Acc:HGNC:408]
ENSG00000112305.14	SMAP1	protein_coding	5694.89	-0.876586	1.3564e-05	0.000201075	107.735	small ArfGAP 1 [Source:HGNC Symbol;Acc:HGNC:19651]
ENSG00000112308.12	C6orf62	protein_coding	8911.64	0.943641	1.95151e-05	0.000270212	249.174	chromosome 6 open reading frame 62 [Source:HGNC Symbol;Acc:HGNC:20998]
ENSG00000112335.14	SNX3	protein_coding	15322.4	-0.912632	1.96914e-05	0.000272031	669.815	sorting nexin 3 [Source:HGNC Symbol;Acc:HGNC:11174]
ENSG00000112339.14	HBS1L	protein_coding	4176.56	-1.03388	8.41709e-07	2.15175e-05	30.6574	HBS1 like translational GTPase [Source:HGNC Symbol;Acc:HGNC:4834]
ENSG00000112378.11	PERP	protein_coding	19620.3	0.663327	0.00066173	0.0042815	443.123	PERP, TP53 apoptosis effector [Source:HGNC Symbol;Acc:HGNC:17637]
ENSG00000112419.14	PHACTR2	protein_coding	1418.63	0.790652	0.000185623	0.00159544	12.6993	phosphatase and actin regulator 2 [Source:HGNC Symbol;Acc:HGNC:20956]
ENSG00000112473.16	SLC39A7	protein_coding	9126.51	-0.614865	0.00672012	0.0255913	248.192	solute carrier family 39 member 7 [Source:HGNC Symbol;Acc:HGNC:4927]
ENSG00000112511.17	PHF1	protein_coding	3390.81	-0.649602	0.00272247	0.0128765	70.5406	PHD finger protein 1 [Source:HGNC Symbol;Acc:HGNC:8919]
ENSG00000112651.11	MRPL2	protein_coding	2042.3	-0.586078	0.00424524	0.0180837	57.5319	mitochondrial ribosomal protein L2 [Source:HGNC Symbol;Acc:HGNC:14056]
ENSG00000112658.7	SRF	protein_coding	4118.33	-0.866683	2.12365e-05	0.000289479	75.4156	serum response factor [Source:HGNC Symbol;Acc:HGNC:11291]
ENSG00000112695.11	COX7A2	protein_coding	8252.66	-0.671686	0.000779045	0.00487196	311.101	cytochrome c oxidase subunit 7A2 [Source:HGNC Symbol;Acc:HGNC:2288]
ENSG00000112715.20	VEGFA	protein_coding	43679.4	-1.35805	1.07906e-08	6.19322e-07	287.393	vascular endothelial growth factor A [Source:HGNC Symbol;Acc:HGNC:12680]
ENSG00000112739.16	PRPF4B	protein_coding	7155.22	-0.645773	0.00268439	0.0127379	69.0397	pre-mRNA processing factor 4B [Source:HGNC Symbol;Acc:HGNC:17346]
ENSG00000112742.9	TTK	protein_coding	4656.75	-1.47494	2.44773e-11	3.50065e-09	94.3459	TTK protein kinase [Source:HGNC Symbol;Acc:HGNC:12401]
ENSG00000112759.16	SLC29A1	protein_coding	844.136	-0.606674	0.00396754	0.017216	19.7224	solute carrier family 29 member 1 (Augustine blood group) [Source:HGNC Symbol;Acc:HGNC:11003]
ENSG00000112763.15	BTN2A1	protein_coding	3026.29	-0.709267	0.000544338	0.0036762	59.5657	butyrophilin subfamily 2 member A1 [Source:HGNC Symbol;Acc:HGNC:1136]
ENSG00000112812.15	PRSS16	protein_coding	1449.74	0.818234	0.000133948	0.00124249	29.6362	serine protease 16 [Source:HGNC Symbol;Acc:HGNC:9480]
ENSG00000112902.11	SEMA5A	protein_coding	418.263	1.19836	9.94925e-06	0.000158245	4.1438	semaphorin 5A [Source:HGNC Symbol;Acc:HGNC:10736]
ENSG00000112941.13	PAPD7	protein_coding	6044.78	-0.859716	1.3751e-05	0.000203156	67.1649	terminal nucleotidyltransferase 4A [Source:HGNC Symbol;Acc:HGNC:16705]
ENSG00000112964.13	GHR	protein_coding	56.2199	1.81433	1.92955e-05	0.000268376	1.27597	growth hormone receptor [Source:HGNC Symbol;Acc:HGNC:4263]
ENSG00000112972.14	HMGCS1	protein_coding	6988.99	-1.14192	1.12899e-07	4.12106e-06	127.592	3-hydroxy-3-methylglutaryl-CoA synthase 1 [Source:HGNC Symbol;Acc:HGNC:5007]
ENSG00000112984.11	KIF20A	protein_coding	9463.55	-1.10673	5.93034e-08	2.44039e-06	189.703	kinesin family member 20A [Source:HGNC Symbol;Acc:HGNC:9787]
ENSG00000113083.12	LOX	protein_coding	3458.33	-1.61952	5.82974e-16	3.74106e-13	59.5136	lysyl oxidase [Source:HGNC Symbol;Acc:HGNC:6664]
ENSG00000113108.17	APBB3	protein_coding	1545.43	-0.634713	0.00223531	0.0109957	22.6972	amyloid beta precursor protein binding family B member 3 [Source:HGNC Symbol;Acc:HGNC:20708]
ENSG00000113119.12	TMCO6	protein_coding	484.925	0.65755	0.00834261	0.0303633	14.6459	transmembrane and coiled-coil domains 6 [Source:HGNC Symbol;Acc:HGNC:28814]
ENSG00000113161.15	HMGCR	protein_coding	9978.15	-1.34551	1.68701e-11	2.62812e-09	137.281	3-hydroxy-3-methylglutaryl-CoA reductase [Source:HGNC Symbol;Acc:HGNC:5006]
ENSG00000113163.15	COL4A3BP	protein_coding	5312.54	-0.60266	0.00116782	0.00667633	43.8722	collagen type IV alpha 3 binding protein [Source:HGNC Symbol;Acc:HGNC:2205]
ENSG00000113212.6	PCDHB7	protein_coding	159.43	1.09213	0.000368421	0.00270487	5.17127	protocadherin beta 7 [Source:HGNC Symbol;Acc:HGNC:8692]
ENSG00000113248.5	PCDHB15	protein_coding	140.286	1.06964	0.00109707	0.0063383	4.4309	protocadherin beta 15 [Source:HGNC Symbol;Acc:HGNC:8686]
ENSG00000113328.18	CCNG1	protein_coding	14213.6	-0.611702	0.000704234	0.00448612	333.866	cyclin G1 [Source:HGNC Symbol;Acc:HGNC:1592]
ENSG00000113356.10	POLR3G	protein_coding	198.582	-1.0955	8.80786e-05	0.00089391	4.65593	RNA polymerase III subunit G [Source:HGNC Symbol;Acc:HGNC:30075]
ENSG00000113384.13	GOLPH3	protein_coding	6491.42	-0.62141	0.001806	0.00939226	166.748	golgi phosphoprotein 3 [Source:HGNC Symbol;Acc:HGNC:15452]
ENSG00000113389.15	NPR3	protein_coding	822.942	0.633265	0.00378849	0.0165751	8.1551	natriuretic peptide receptor 3 [Source:HGNC Symbol;Acc:HGNC:7945]
ENSG00000113460.12	BRIX1	protein_coding	1835.59	-0.836142	0.00100576	0.00591258	31.9399	BRX1, biogenesis of ribosomes [Source:HGNC Symbol;Acc:HGNC:24170]
ENSG00000113494.16	PRLR	protein_coding	1937.27	0.716367	0.00345158	0.0154617	15.6182	prolactin receptor [Source:HGNC Symbol;Acc:HGNC:9446]
ENSG00000113522.13	RAD50	protein_coding	3950.83	0.718838	0.00111239	0.00641194	42.3356	RAD50 double strand break repair protein [Source:HGNC Symbol;Acc:HGNC:9816]
ENSG00000113575.9	PPP2CA	protein_coding	6097.94	-0.813198	0.000130335	0.00121869	84.7232	protein phosphatase 2 catalytic subunit alpha [Source:HGNC Symbol;Acc:HGNC:9299]
ENSG00000113583.7	C5orf15	protein_coding	4320.95	-0.605036	0.00167997	0.00888513	123.232	chromosome 5 open reading frame 15 [Source:HGNC Symbol;Acc:HGNC:20656]
ENSG00000113615.12	SEC24A	protein_coding	9238.54	-0.765741	6.20449e-05	0.000673652	93.804	SEC24 homolog A, COPII coat complex component [Source:HGNC Symbol;Acc:HGNC:10703]
ENSG00000113649.11	TCERG1	protein_coding	6111.48	-0.665044	0.000323139	0.00245066	50.8941	transcription elongation regulator 1 [Source:HGNC Symbol;Acc:HGNC:15630]
ENSG00000113712.16	CSNK1A1	protein_coding	11515.5	-0.805771	9.92841e-05	0.000984826	117.616	casein kinase 1 alpha 1 [Source:HGNC Symbol;Acc:HGNC:2451]
ENSG00000113734.17	BNIP1	protein_coding	1423.13	-0.830806	0.000133449	0.00124082	43.7844	BCL2 interacting protein 1 [Source:HGNC Symbol;Acc:HGNC:1082]
ENSG00000113739.10	STC2	protein_coding	73176.3	-1.45678	1.13887e-15	6.41001e-13	1049.94	stanniocalcin 2 [Source:HGNC Symbol;Acc:HGNC:11374]
ENSG00000113758.13	DBN1	protein_coding	2308.6	0.987964	2.71852e-06	5.51782e-05	53.3618	drebrin 1 [Source:HGNC Symbol;Acc:HGNC:2695]
ENSG00000113763.10	UNC5A	protein_coding	264.324	-1.66283	3.6749e-10	3.54252e-08	5.33434	unc-5 netrin receptor A [Source:HGNC Symbol;Acc:HGNC:12567]
ENSG00000113790.10	EHHADH	protein_coding	359.096	1.72742	1.00088e-07	3.75557e-06	10.7582	enoyl-CoA hydratase and 3-hydroxyacyl CoA dehydrogenase [Source:HGNC Symbol;Acc:HGNC:3247]
ENSG00000113966.9	ARL6	protein_coding	347.693	-0.875134	0.00031844	0.00242732	6.68386	ADP ribosylation factor like GTPase 6 [Source:HGNC Symbol;Acc:HGNC:13210]
ENSG00000114023.15	FAM162A	protein_coding	18662.5	-0.858758	1.08489e-05	0.000169464	369.662	family with sequence similarity 162 member A [Source:HGNC Symbol;Acc:HGNC:17865]
ENSG00000114026.21	OGG1	protein_coding	929.678	0.875996	4.58359e-05	0.000528931	11.7462	8-oxoguanine DNA glycosylase [Source:HGNC Symbol;Acc:HGNC:8125]
ENSG00000114054.13	PCCB	protein_coding	2570.1	-0.781408	0.000218858	0.0018115	24.9284	propionyl-CoA carboxylase subunit beta [Source:HGNC Symbol;Acc:HGNC:8654]
ENSG00000114120.11	SLC25A36	protein_coding	15372.1	-0.919774	7.98073e-07	2.07214e-05	125.433	solute carrier family 25 member 36 [Source:HGNC Symbol;Acc:HGNC:25554]
ENSG00000114125.13	RNF7	protein_coding	6379.58	-0.848345	0.000162257	0.00143817	166.005	ring finger protein 7 [Source:HGNC Symbol;Acc:HGNC:10070]
ENSG00000114126.17	TFDP2	protein_coding	2982.54	0.91519	5.83256e-05	0.000643278	26.9539	transcription factor Dp-2 [Source:HGNC Symbol;Acc:HGNC:11751]
ENSG00000114209.14	PDCD10	protein_coding	3794.1	-1.15552	1.68471e-08	8.80087e-07	95.07	programmed cell death 10 [Source:HGNC Symbol;Acc:HGNC:8761]
ENSG00000114268.11	PFKFB4	protein_coding	18347.5	-0.840876	7.20867e-06	0.000121877	220.676	6-phosphofructo-2-kinase/fructose-2,6-biphosphatase 4 [Source:HGNC Symbol;Acc:HGNC:8875]
ENSG00000114270.15	COL7A1	protein_coding	980.211	0.73332	0.00177731	0.00927623	10.6437	collagen type VII alpha 1 chain [Source:HGNC Symbol;Acc:HGNC:2214]
ENSG00000114279.13	FGF12	protein_coding	106.269	0.84874	0.0136379	0.0442706	1.7088	fibroblast growth factor 12 [Source:HGNC Symbol;Acc:HGNC:3668]
ENSG00000114315.3	HES1	protein_coding	10740.5	-0.694641	0.00236499	0.0115103	400.142	hes family bHLH transcription factor 1 [Source:HGNC Symbol;Acc:HGNC:5192]
ENSG00000114331.13	ACAP2	protein_coding	6576.54	-0.687584	0.000180713	0.00156248	44.9929	ArfGAP with coiled-coil, ankyrin repeat and PH domains 2 [Source:HGNC Symbol;Acc:HGNC:16469]
ENSG00000114346.13	ECT2	protein_coding	6667.52	-1.0621	3.32136e-08	1.50859e-06	96.9327	epithelial cell transforming 2 [Source:HGNC Symbol;Acc:HGNC:3155]
ENSG00000114383.9	TUSC2	protein_coding	1009.32	-0.84531	0.000248473	0.0020034	33.0804	tumor suppressor 2, mitochondrial calcium regulator [Source:HGNC Symbol;Acc:HGNC:17034]
ENSG00000114388.12	NPRL2	protein_coding	3119.8	-0.898403	0.00020161	0.00169282	73.0362	NPR2 like, GATOR1 complex subunit [Source:HGNC Symbol;Acc:HGNC:24969]
ENSG00000114446.4	IFT57	protein_coding	747.537	0.678331	0.00119301	0.00678879	20.6796	intraflagellar transport 57 [Source:HGNC Symbol;Acc:HGNC:17367]
ENSG00000114480.12	GBE1	protein_coding	12548.6	-0.590575	0.000997662	0.00587089	188.834	1,4-alpha-glucan branching enzyme 1 [Source:HGNC Symbol;Acc:HGNC:4180]
ENSG00000114529.12	C3orf52	protein_coding	171.484	-0.788666	0.00854714	0.0309155	2.23497	chromosome 3 open reading frame 52 [Source:HGNC Symbol;Acc:HGNC:26255]
ENSG00000114554.11	PLXNA1	protein_coding	3695.92	0.732925	0.00026937	0.00212093	35.375	plexin A1 [Source:HGNC Symbol;Acc:HGNC:9099]
ENSG00000114631.10	PODXL2	protein_coding	483.336	1.91069	5.51572e-16	3.70147e-13	30.5417	podocalyxin like 2 [Source:HGNC Symbol;Acc:HGNC:17936]
ENSG00000114656.10	KIAA1257	protein_coding	83.5254	0.97353	0.00642483	0.0247626	1.26491	KIAA1257 [Source:HGNC Symbol;Acc:HGNC:29231]
ENSG00000114670.13	NEK11	protein_coding	268.033	1.94519	1.32796e-11	2.19779e-09	7.57777	NIMA related kinase 11 [Source:HGNC Symbol;Acc:HGNC:18593]
ENSG00000114735.9	HEMK1	protein_coding	3776.03	0.694874	0.000352793	0.00261049	20.2444	HemK methyltransferase family member 1 [Source:HGNC Symbol;Acc:HGNC:24923]
ENSG00000114738.10	MAPKAPK3	protein_coding	920.021	0.729968	0.00102344	0.00600434	24.1066	mitogen-activated protein kinase-activated protein kinase 3 [Source:HGNC Symbol;Acc:HGNC:6888]
ENSG00000114745.13	GORASP1	protein_coding	3387.55	-0.764185	0.000235441	0.00191894	41.0596	golgi reassembly stacking protein 1 [Source:HGNC Symbol;Acc:HGNC:16769]
ENSG00000114812.12	VIPR1	protein_coding	1405.72	-0.780001	0.000287981	0.00223917	14.1995	vasoactive intestinal peptide receptor 1 [Source:HGNC Symbol;Acc:HGNC:12694]
ENSG00000114841.17	DNAH1	protein_coding	453.593	0.656028	0.00821616	0.0299844	3.62405	dynein axonemal heavy chain 1 [Source:HGNC Symbol;Acc:HGNC:2940]
ENSG00000114850.6	SSR3	protein_coding	4951.12	-0.669385	0.000726581	0.00460159	77.0315	signal sequence receptor subunit 3 [Source:HGNC Symbol;Acc:HGNC:11325]
ENSG00000114853.13	ZBTB47	protein_coding	122.943	1.15698	0.000662402	0.00428376	3.68911	zinc finger and BTB domain containing 47 [Source:HGNC Symbol;Acc:HGNC:26955]
ENSG00000114902.13	SPCS1	protein_coding	2773.14	-1.01231	2.37034e-06	4.98286e-05	42.4783	signal peptidase complex subunit 1 [Source:HGNC Symbol;Acc:HGNC:23401]
ENSG00000114923.16	SLC4A3	protein_coding	500.882	1.23529	1.18695e-07	4.273e-06	11.9155	solute carrier family 4 member 3 [Source:HGNC Symbol;Acc:HGNC:11029]
ENSG00000114942.13	EEF1B2	protein_coding	20328	-0.665273	0.000441178	0.00312405	744.386	eukaryotic translation elongation factor 1 beta 2 [Source:HGNC Symbol;Acc:HGNC:3208]
ENSG00000115129.13	TP53I3	protein_coding	231.037	0.697723	0.00965612	0.0338994	10.5894	tumor protein p53 inducible protein 3 [Source:HGNC Symbol;Acc:HGNC:19373]
ENSG00000115159.15	GPD2	protein_coding	10175	-0.995261	2.98979e-07	9.29873e-06	112.705	glycerol-3-phosphate dehydrogenase 2 [Source:HGNC Symbol;Acc:HGNC:4456]
ENSG00000115163.14	CENPA	protein_coding	1237.68	-0.831148	9.60785e-05	0.000957383	46.2651	centromere protein A [Source:HGNC Symbol;Acc:HGNC:1851]
ENSG00000115170.13	ACVR1	protein_coding	2308.97	-0.687795	0.000390724	0.00283336	43.3308	activin A receptor type 1 [Source:HGNC Symbol;Acc:HGNC:171]
ENSG00000115267.5	IFIH1	protein_coding	746.54	0.776781	0.00249343	0.0120048	18.0133	interferon induced with helicase C domain 1 [Source:HGNC Symbol;Acc:HGNC:18873]
ENSG00000115268.9	RPS15	protein_coding	23104.2	-0.677057	0.000544911	0.00367657	783.102	ribosomal protein S15 [Source:HGNC Symbol;Acc:HGNC:10388]
ENSG00000115286.19	NDUFS7	protein_coding	1327.56	-1.17178	1.73405e-06	3.90397e-05	15.9815	NADH:ubiquinone oxidoreductase core subunit S7 [Source:HGNC Symbol;Acc:HGNC:7714]
ENSG00000115289.12	PCGF1	protein_coding	1363.61	-0.988545	0.000192497	0.00163566	47.8498	polycomb group ring finger 1 [Source:HGNC Symbol;Acc:HGNC:17615]
ENSG00000115295.19	CLIP4	protein_coding	356.602	0.741667	0.00186742	0.00958931	4.79341	CAP-Gly domain containing linker protein family member 4 [Source:HGNC Symbol;Acc:HGNC:26108]
ENSG00000115310.17	RTN4	protein_coding	10760.8	-0.806741	1.53248e-05	0.000223008	117.545	reticulon 4 [Source:HGNC Symbol;Acc:HGNC:14085]
ENSG00000115317.11	HTRA2	protein_coding	832.33	0.621351	0.00557562	0.022282	27.8636	HtrA serine peptidase 2 [Source:HGNC Symbol;Acc:HGNC:14348]
ENSG00000115350.11	POLE4	protein_coding	2307.23	-0.942384	4.23867e-05	0.000499705	89.8354	DNA polymerase epsilon 4, accessory subunit [Source:HGNC Symbol;Acc:HGNC:18755]
ENSG00000115419.12	GLS	protein_coding	2613.91	-0.597761	0.00243611	0.0117825	18.5454	glutaminase [Source:HGNC Symbol;Acc:HGNC:4331]
ENSG00000115457.9	IGFBP2	protein_coding	4797.44	-0.669098	0.000417293	0.00299012	70.5873	insulin like growth factor binding protein 2 [Source:HGNC Symbol;Acc:HGNC:5471]
ENSG00000115461.4	IGFBP5	protein_coding	24135.9	2.4484	6.38845e-19	7.43104e-16	541.639	insulin like growth factor binding protein 5 [Source:HGNC Symbol;Acc:HGNC:5474]
ENSG00000115468.11	EFHD1	protein_coding	1229.09	-0.604972	0.00437806	0.0185184	28.5399	EF-hand domain family member D1 [Source:HGNC Symbol;Acc:HGNC:29556]
ENSG00000115520.8	COQ10B	protein_coding	1665.04	-0.706116	0.000663997	0.00428831	44.0317	coenzyme Q10B [Source:HGNC Symbol;Acc:HGNC:25819]
ENSG00000115526.10	CHST10	protein_coding	100.752	1.11931	0.00228303	0.0111841	3.07627	carbohydrate sulfotransferase 10 [Source:HGNC Symbol;Acc:HGNC:19650]
ENSG00000115548.16	KDM3A	protein_coding	23855.9	-0.650107	0.00084615	0.00518204	127.995	lysine demethylase 3A [Source:HGNC Symbol;Acc:HGNC:20815]
ENSG00000115594.11	IL1R1	protein_coding	57.158	1.56683	0.000247646	0.00199858	1.4462	interleukin 1 receptor type 1 [Source:HGNC Symbol;Acc:HGNC:5993]
ENSG00000115641.18	FHL2	protein_coding	670.782	-0.787447	0.00151821	0.00820878	7.90049	four and a half LIM domains 2 [Source:HGNC Symbol;Acc:HGNC:3703]
ENSG00000115652.14	UXS1	protein_coding	3899.88	-1.3157	5.19362e-12	9.95806e-10	45.9517	UDP-glucuronate decarboxylase 1 [Source:HGNC Symbol;Acc:HGNC:17729]
ENSG00000115657.12	ABCB6	protein_coding	528.513	-0.877294	0.000228521	0.00187282	7.83809	ATP binding cassette subfamily B member 6 (Langereis blood group) [Source:HGNC Symbol;Acc:HGNC:47]
ENSG00000115738.9	ID2	protein_coding	14795.7	-0.771309	0.000230047	0.00188356	520.21	inhibitor of DNA binding 2 [Source:HGNC Symbol;Acc:HGNC:5361]
ENSG00000115756.12	HPCAL1	protein_coding	3504.87	-1.0119	3.86605e-07	1.13752e-05	48.2868	hippocalcin like 1 [Source:HGNC Symbol;Acc:HGNC:5145]
ENSG00000115758.12	ODC1	protein_coding	758.094	1.55996	2.12659e-11	3.11804e-09	35.2963	ornithine decarboxylase 1 [Source:HGNC Symbol;Acc:HGNC:8109]
ENSG00000115760.13	BIRC6	protein_coding	13414.8	-0.652421	0.000233388	0.00190644	58.6608	baculoviral IAP repeat containing 6 [Source:HGNC Symbol;Acc:HGNC:13516]
ENSG00000115816.13	CEBPZ	protein_coding	4511.5	-0.622837	0.00377346	0.0165442	92.5856	CCAAT enhancer binding protein zeta [Source:HGNC Symbol;Acc:HGNC:24218]
ENSG00000115840.13	SLC25A12	protein_coding	363.033	0.6384	0.00931685	0.0330005	7.60358	solute carrier family 25 member 12 [Source:HGNC Symbol;Acc:HGNC:10982]
ENSG00000115841.19	RMDN2	protein_coding	49.5832	1.21188	0.00853653	0.0309015	1.32	regulator of microtubule dynamics 2 [Source:HGNC Symbol;Acc:HGNC:26567]
ENSG00000115904.12	SOS1	protein_coding	4273.43	0.68511	0.0128324	0.0421354	49.991	SOS Ras/Rac guanine nucleotide exchange factor 1 [Source:HGNC Symbol;Acc:HGNC:11187]
ENSG00000115963.13	RND3	protein_coding	9458.39	-0.953266	6.40681e-06	0.00011057	214.099	Rho family GTPase 3 [Source:HGNC Symbol;Acc:HGNC:671]
ENSG00000115977.18	AAK1	protein_coding	2491.02	-0.613626	0.000957312	0.00567942	7.8034	AP2 associated kinase 1 [Source:HGNC Symbol;Acc:HGNC:19679]
ENSG00000115993.11	TRAK2	protein_coding	2002.6	0.894342	0.000181601	0.00156705	31.1734	trafficking kinesin protein 2 [Source:HGNC Symbol;Acc:HGNC:13206]
ENSG00000116016.13	EPAS1	protein_coding	13394.5	-0.585249	0.000967699	0.0057313	137.46	endothelial PAS domain protein 1 [Source:HGNC Symbol;Acc:HGNC:3374]
ENSG00000116030.16	SUMO1	protein_coding	5186.35	-0.744136	0.000683711	0.0043858	188.033	small ubiquitin-like modifier 1 [Source:HGNC Symbol;Acc:HGNC:12502]
ENSG00000116039.11	ATP6V1B1	protein_coding	371.736	-0.786995	0.00170181	0.00895992	10.4448	ATPase H+ transporting V1 subunit B1 [Source:HGNC Symbol;Acc:HGNC:853]
ENSG00000116044.15	NFE2L2	protein_coding	8567.23	-0.809166	9.75373e-05	0.000969152	111.017	nuclear factor, erythroid 2 like 2 [Source:HGNC Symbol;Acc:HGNC:7782]
ENSG00000116117.17	PARD3B	protein_coding	175.304	0.963006	0.00176718	0.0092372	1.9943	par-3 family cell polarity regulator beta [Source:HGNC Symbol;Acc:HGNC:14446]
ENSG00000116133.11	DHCR24	protein_coding	10142.3	-0.643624	0.000292244	0.00226827	179.959	24-dehydrocholesterol reductase [Source:HGNC Symbol;Acc:HGNC:2859]
ENSG00000116151.13	MORN1	protein_coding	355.763	0.912903	0.000268401	0.0021152	3.67184	MORN repeat containing 1 [Source:HGNC Symbol;Acc:HGNC:25852]
ENSG00000116198.12	CEP104	protein_coding	1627.62	0.79254	0.000222902	0.00183339	21.5197	centrosomal protein 104 [Source:HGNC Symbol;Acc:HGNC:24866]
ENSG00000116212.14	LRRC42	protein_coding	2785.69	-0.671185	0.00161991	0.00861976	84.2464	leucine rich repeat containing 42 [Source:HGNC Symbol;Acc:HGNC:28792]
ENSG00000116221.15	MRPL37	protein_coding	6080.73	-0.634685	0.00148244	0.00808048	167.282	mitochondrial ribosomal protein L37 [Source:HGNC Symbol;Acc:HGNC:14034]
ENSG00000116237.15	ICMT	protein_coding	585.891	0.671536	0.00429629	0.0182611	13.3017	isoprenylcysteine carboxyl methyltransferase [Source:HGNC Symbol;Acc:HGNC:5350]
ENSG00000116254.17	CHD5	protein_coding	657.516	1.16899	7.33829e-08	2.93882e-06	7.85986	chromodomain helicase DNA binding protein 5 [Source:HGNC Symbol;Acc:HGNC:16816]
ENSG00000116260.16	QSOX1	protein_coding	55834.3	-0.596311	0.00140057	0.00772348	410.653	quiescin sulfhydryl oxidase 1 [Source:HGNC Symbol;Acc:HGNC:9756]
ENSG00000116273.5	PHF13	protein_coding	2719.96	-0.649403	0.0039003	0.0169834	56.7401	PHD finger protein 13 [Source:HGNC Symbol;Acc:HGNC:22983]
ENSG00000116285.12	ERRFI1	protein_coding	24181.1	-1.08756	1.57683e-09	1.22824e-07	471.383	ERBB receptor feedback inhibitor 1 [Source:HGNC Symbol;Acc:HGNC:18185]
ENSG00000116288.12	PARK7	protein_coding	5034.83	-0.709817	0.000163148	0.00144278	151.347	Parkinsonism associated deglycase [Source:HGNC Symbol;Acc:HGNC:16369]
ENSG00000116350.16	SRSF4	protein_coding	6671.52	-0.827095	0.000162379	0.00143817	60.3066	serine and arginine rich splicing factor 4 [Source:HGNC Symbol;Acc:HGNC:10786]
ENSG00000116497.17	S100PBP	protein_coding	1506.18	-0.698838	0.000317512	0.00242263	12.1184	S100P binding protein [Source:HGNC Symbol;Acc:HGNC:25768]
ENSG00000116514.16	RNF19B	protein_coding	1704.98	-0.784582	0.000505636	0.00346381	47.2515	ring finger protein 19B [Source:HGNC Symbol;Acc:HGNC:26886]
ENSG00000116521.10	SCAMP3	protein_coding	3102.26	-0.594609	0.00460099	0.0191961	90.4775	secretory carrier membrane protein 3 [Source:HGNC Symbol;Acc:HGNC:10565]
ENSG00000116525.13	TRIM62	protein_coding	591.973	-0.612145	0.00567864	0.0226057	11.4391	tripartite motif containing 62 [Source:HGNC Symbol;Acc:HGNC:25574]
ENSG00000116584.17	ARHGEF2	protein_coding	848.969	0.84553	0.000543214	0.00367087	10.0125	Rho/Rac guanine nucleotide exchange factor 2 [Source:HGNC Symbol;Acc:HGNC:682]
ENSG00000116604.17	MEF2D	protein_coding	5257.54	-1.12431	2.05602e-07	6.82006e-06	67.5016	myocyte enhancer factor 2D [Source:HGNC Symbol;Acc:HGNC:6997]
ENSG00000116663.10	FBXO6	protein_coding	652.942	-0.589959	0.0148948	0.0473959	26.2882	F-box protein 6 [Source:HGNC Symbol;Acc:HGNC:13585]
ENSG00000116668.12	SWT1	protein_coding	409.052	1.06978	0.000164428	0.00145043	11.0389	SWT1, RNA endoribonuclease homolog [Source:HGNC Symbol;Acc:HGNC:16785]
ENSG00000116675.15	DNAJC6	protein_coding	403.764	0.663227	0.00920941	0.032673	6.29116	DnaJ heat shock protein family (Hsp40) member C6 [Source:HGNC Symbol;Acc:HGNC:15469]
ENSG00000116678.18	LEPR	protein_coding	689.746	1.08042	1.53754e-06	3.54385e-05	6.5748	leptin receptor [Source:HGNC Symbol;Acc:HGNC:6554]
ENSG00000116685.15	KIAA2013	protein_coding	3739.49	-0.740332	0.000106216	0.0010369	81.652	KIAA2013 [Source:HGNC Symbol;Acc:HGNC:28513]
ENSG00000116698.20	SMG7	protein_coding	13447.4	-0.605583	0.00241323	0.0116961	114.596	SMG7, nonsense mediated mRNA decay factor [Source:HGNC Symbol;Acc:HGNC:16792]
ENSG00000116717.11	GADD45A	protein_coding	2643.54	-1.3147	2.49973e-06	5.20469e-05	129.702	growth arrest and DNA damage inducible alpha [Source:HGNC Symbol;Acc:HGNC:4095]
ENSG00000116793.15	PHTF1	protein_coding	504.062	0.961266	0.000179492	0.00155577	8.91643	putative homeodomain transcription factor 1 [Source:HGNC Symbol;Acc:HGNC:8939]
ENSG00000116857.16	TMEM9	protein_coding	9522.67	-0.65025	0.000752571	0.00474209	171.832	transmembrane protein 9 [Source:HGNC Symbol;Acc:HGNC:18823]
ENSG00000116903.7	EXOC8	protein_coding	1052.37	-0.662931	0.000866368	0.00526703	15.6322	exocyst complex component 8 [Source:HGNC Symbol;Acc:HGNC:24659]
ENSG00000116918.13	TSNAX	protein_coding	1174.49	-0.802182	0.000711683	0.00452037	15.2779	translin associated factor X [Source:HGNC Symbol;Acc:HGNC:12380]
ENSG00000117054.13	ACADM	protein_coding	553.173	1.29734	3.58645e-06	6.90688e-05	14.5632	acyl-CoA dehydrogenase medium chain [Source:HGNC Symbol;Acc:HGNC:89]
ENSG00000117115.12	PADI2	protein_coding	1074.49	1.4881	4.43281e-11	5.94951e-09	21.362	peptidyl arginine deiminase 2 [Source:HGNC Symbol;Acc:HGNC:18341]
ENSG00000117122.13	MFAP2	protein_coding	155.898	0.939115	0.00226477	0.0111274	6.45489	microfibril associated protein 2 [Source:HGNC Symbol;Acc:HGNC:7033]
ENSG00000117174.10	ZNHIT6	protein_coding	555.985	-0.812559	0.000395802	0.00286198	14.7293	zinc finger HIT-type containing 6 [Source:HGNC Symbol;Acc:HGNC:26089]
ENSG00000117242.7	PINK1-AS	antisense	270.553	1.08069	7.19475e-05	0.000758972	7.65239	PINK1 antisense RNA [Source:HGNC Symbol;Acc:HGNC:38872]
ENSG00000117360.12	PRPF3	protein_coding	14685	-0.752871	0.00134718	0.00747394	226.212	pre-mRNA processing factor 3 [Source:HGNC Symbol;Acc:HGNC:17348]
ENSG00000117394.19	SLC2A1	protein_coding	16266.9	-1.02377	1.695e-06	3.83088e-05	274.037	solute carrier family 2 member 1 [Source:HGNC Symbol;Acc:HGNC:11005]
ENSG00000117399.13	CDC20	protein_coding	5200.71	-0.978702	8.18099e-07	2.1129e-05	212.115	cell division cycle 20 [Source:HGNC Symbol;Acc:HGNC:1723]
ENSG00000117410.13	ATP6V0B	protein_coding	2566.37	-0.627975	0.00362069	0.0160055	54.0403	ATPase H+ transporting V0 subunit b [Source:HGNC Symbol;Acc:HGNC:861]
ENSG00000117461.14	PIK3R3	protein_coding	888.071	0.916928	0.000746732	0.00471211	15.9514	phosphoinositide-3-kinase regulatory subunit 3 [Source:HGNC Symbol;Acc:HGNC:8981]
ENSG00000117479.12	SLC19A2	protein_coding	3108.46	-1.15776	6.76803e-10	5.96407e-08	69.4775	solute carrier family 19 member 2 [Source:HGNC Symbol;Acc:HGNC:10938]
ENSG00000117505.12	DR1	protein_coding	2120.61	-1.01023	4.93983e-06	9.06311e-05	15.9229	down-regulator of transcription 1 [Source:HGNC Symbol;Acc:HGNC:3017]
ENSG00000117569.18	PTBP2	protein_coding	1316.57	-1.02383	4.3725e-05	0.000513401	9.11479	polypyrimidine tract binding protein 2 [Source:HGNC Symbol;Acc:HGNC:17662]
ENSG00000117595.10	IRF6	protein_coding	3321.59	-0.72326	0.00014678	0.00133247	53.272	interferon regulatory factor 6 [Source:HGNC Symbol;Acc:HGNC:6121]
ENSG00000117602.11	RCAN3	protein_coding	1343.37	0.63992	0.00130284	0.00726869	18.7464	RCAN family member 3 [Source:HGNC Symbol;Acc:HGNC:3042]
ENSG00000117625.13	RCOR3	protein_coding	2918.95	-0.619183	0.00508742	0.020714	24.2718	REST corepressor 3 [Source:HGNC Symbol;Acc:HGNC:25594]
ENSG00000117650.12	NEK2	protein_coding	2614.02	-1.50623	5.81542e-12	1.10291e-09	77.0947	NIMA related kinase 2 [Source:HGNC Symbol;Acc:HGNC:7745]
ENSG00000117758.13	STX12	protein_coding	2361.88	0.770619	4.62224e-05	0.000532687	60.6308	syntaxin 12 [Source:HGNC Symbol;Acc:HGNC:11430]
ENSG00000117899.10	MESDC2	protein_coding	3543.3	0.794294	3.5899e-05	0.000434976	49.1128	mesoderm development LRP chaperone [Source:HGNC Symbol;Acc:HGNC:13520]
ENSG00000117971.11	CHRNB4	protein_coding	295.507	0.939571	0.000299069	0.00230484	6.29252	cholinergic receptor nicotinic beta 4 subunit [Source:HGNC Symbol;Acc:HGNC:1964]
ENSG00000118046.14	STK11	protein_coding	3930.11	-0.693686	0.00127357	0.00713319	36.9382	serine/threonine kinase 11 [Source:HGNC Symbol;Acc:HGNC:11389]
ENSG00000118181.10	RPS25	protein_coding	49945.8	-0.766926	0.000271798	0.0021333	2618.59	ribosomal protein S25 [Source:HGNC Symbol;Acc:HGNC:10413]
ENSG00000118307.18	CASC1	protein_coding	28.2034	1.1363	0.0152358	0.048178	1.37816	cancer susceptibility 1 [Source:HGNC Symbol;Acc:HGNC:29599]
ENSG00000118495.18	PLAGL1	protein_coding	512.282	0.611317	0.00949047	0.0334931	8.89621	PLAG1 like zinc finger 1 [Source:HGNC Symbol;Acc:HGNC:9046]
ENSG00000118507.15	AKAP7	protein_coding	55.4703	1.42135	0.000527093	0.00358686	1.63683	A-kinase anchoring protein 7 [Source:HGNC Symbol;Acc:HGNC:377]
ENSG00000118508.4	RAB32	protein_coding	1894.81	-0.7632	0.000151136	0.00136129	120.84	RAB32, member RAS oncogene family [Source:HGNC Symbol;Acc:HGNC:9772]
ENSG00000118513.18	MYB	protein_coding	1754.65	1.53834	8.90385e-12	1.56924e-09	43.8223	MYB proto-oncogene, transcription factor [Source:HGNC Symbol;Acc:HGNC:7545]
ENSG00000118515.11	SGK1	protein_coding	138.455	1.59126	2.73417e-06	5.5279e-05	1.70336	serum/glucocorticoid regulated kinase 1 [Source:HGNC Symbol;Acc:HGNC:10810]
ENSG00000118518.15	RNF146	protein_coding	2180.78	-0.59858	0.00909028	0.0323374	47.6611	ring finger protein 146 [Source:HGNC Symbol;Acc:HGNC:21336]
ENSG00000118564.14	FBXL5	protein_coding	3422.74	-0.837241	4.20545e-05	0.000496123	56.5212	F-box and leucine rich repeat protein 5 [Source:HGNC Symbol;Acc:HGNC:13602]
ENSG00000118600.11	TMEM5	protein_coding	719.239	0.604418	0.00401293	0.0173612	9.43948	ribitol xylosyltransferase 1 [Source:HGNC Symbol;Acc:HGNC:13530]
ENSG00000118640.10	VAMP8	protein_coding	6353.91	-0.655212	0.00123985	0.00697642	468.545	vesicle associated membrane protein 8 [Source:HGNC Symbol;Acc:HGNC:12647]
ENSG00000118680.12	MYL12B	protein_coding	22287.1	-0.637797	0.00106745	0.00619822	904.692	myosin light chain 12B [Source:HGNC Symbol;Acc:HGNC:29827]
ENSG00000118689.14	FOXO3	protein_coding	12398.2	-0.839236	3.75015e-05	0.000450327	130.619	forkhead box O3 [Source:HGNC Symbol;Acc:HGNC:3821]
ENSG00000118705.16	RPN2	protein_coding	16429.6	-0.666222	0.000250968	0.00201885	415.755	ribophorin II [Source:HGNC Symbol;Acc:HGNC:10382]
ENSG00000118707.9	TGIF2	protein_coding	2113.37	0.682747	0.00211364	0.0105368	54.4673	TGFB induced factor homeobox 2 [Source:HGNC Symbol;Acc:HGNC:15764]
ENSG00000118762.7	PKD2	protein_coding	612.147	0.79416	0.00119046	0.00677908	12.1169	polycystin 2, transient receptor potential cation channel [Source:HGNC Symbol;Acc:HGNC:9009]
ENSG00000118804.8	STBD1	protein_coding	350.347	-0.94629	0.000163133	0.00144278	7.90712	starch binding domain 1 [Source:HGNC Symbol;Acc:HGNC:24854]
ENSG00000118855.18	MFSD1	protein_coding	1445.07	0.654515	0.00197208	0.0100288	29.2765	major facilitator superfamily domain containing 1 [Source:HGNC Symbol;Acc:HGNC:25874]
ENSG00000118894.14	EEF2KMT	protein_coding	120.6	0.869064	0.00670081	0.0255386	4.4128	eukaryotic elongation factor 2 lysine methyltransferase [Source:HGNC Symbol;Acc:HGNC:32221]
ENSG00000118985.15	ELL2	protein_coding	3224.29	-1.14617	3.20092e-09	2.28892e-07	35.7762	elongation factor for RNA polymerase II 2 [Source:HGNC Symbol;Acc:HGNC:17064]
ENSG00000119138.4	KLF9	protein_coding	5360.83	-1.24187	2.9544e-07	9.23806e-06	97.5054	Kruppel like factor 9 [Source:HGNC Symbol;Acc:HGNC:1123]
ENSG00000119227.7	PIGZ	protein_coding	328.058	0.806953	0.000925629	0.00553854	10.9957	phosphatidylinositol glycan anchor biosynthesis class Z [Source:HGNC Symbol;Acc:HGNC:30596]
ENSG00000119242.8	CCDC92	protein_coding	1200.24	0.848333	5.60978e-05	0.00062463	15.1517	coiled-coil domain containing 92 [Source:HGNC Symbol;Acc:HGNC:29563]
ENSG00000119318.12	RAD23B	protein_coding	26612	-0.78761	0.00010246	0.00100888	451.809	RAD23 homolog B, nucleotide excision repair protein [Source:HGNC Symbol;Acc:HGNC:9813]
ENSG00000119326.14	CTNNAL1	protein_coding	1215.73	0.72048	0.000513622	0.00351163	40.5821	catenin alpha like 1 [Source:HGNC Symbol;Acc:HGNC:2512]
ENSG00000119396.10	RAB14	protein_coding	13923.7	-1.01388	1.40633e-06	3.30252e-05	266.17	RAB14, member RAS oncogene family [Source:HGNC Symbol;Acc:HGNC:16524]
ENSG00000119397.16	CNTRL	protein_coding	3325.07	0.655472	0.00151218	0.00817871	34.2064	centriolin [Source:HGNC Symbol;Acc:HGNC:1858]
ENSG00000119446.13	RBM18	protein_coding	4084.37	-0.733826	0.00123688	0.00696838	62.3096	RNA binding motif protein 18 [Source:HGNC Symbol;Acc:HGNC:28413]
ENSG00000119523.9	ALG2	protein_coding	3976.65	-0.730903	0.00080073	0.0049808	103.854	ALG2, alpha-1,3/1,6-mannosyltransferase [Source:HGNC Symbol;Acc:HGNC:23159]
ENSG00000119547.5	ONECUT2	protein_coding	311.173	-1.13162	7.37651e-06	0.000124353	1.83856	one cut homeobox 2 [Source:HGNC Symbol;Acc:HGNC:8139]
ENSG00000119636.15	BBOF1	protein_coding	472.096	0.963706	0.000213266	0.00177634	11.8408	basal body orientation factor 1 [Source:HGNC Symbol;Acc:HGNC:19855]
ENSG00000119638.12	NEK9	protein_coding	453.784	0.868414	0.000704529	0.00448636	4.88275	NIMA related kinase 9 [Source:HGNC Symbol;Acc:HGNC:18591]
ENSG00000119650.12	IFT43	protein_coding	881.819	0.908867	2.12544e-05	0.000289498	23.8488	intraflagellar transport 43 [Source:HGNC Symbol;Acc:HGNC:29669]
ENSG00000119661.14	DNAL1	protein_coding	758.262	0.906399	7.73054e-05	0.000804309	9.37138	dynein axonemal light chain 1 [Source:HGNC Symbol;Acc:HGNC:23247]
ENSG00000119669.4	IRF2BPL	protein_coding	5677.94	-0.894555	1.00544e-05	0.000159771	106.012	interferon regulatory factor 2 binding protein like [Source:HGNC Symbol;Acc:HGNC:14282]
ENSG00000119681.11	LTBP2	protein_coding	799.626	1.50384	1.307e-12	3.19359e-10	10.4618	latent transforming growth factor beta binding protein 2 [Source:HGNC Symbol;Acc:HGNC:6715]
ENSG00000119686.9	FLVCR2	protein_coding	1972.37	-0.606146	0.00118612	0.00675718	29.8796	feline leukemia virus subgroup C cellular receptor family member 2 [Source:HGNC Symbol;Acc:HGNC:20105]
ENSG00000119707.13	RBM25	protein_coding	12501.5	-1.2288	2.27741e-06	4.83998e-05	104.281	RNA binding motif protein 25 [Source:HGNC Symbol;Acc:HGNC:23244]
ENSG00000119787.13	ATL2	protein_coding	6996.8	-1.20016	4.99831e-09	3.27859e-07	120.172	atlastin GTPase 2 [Source:HGNC Symbol;Acc:HGNC:24047]
ENSG00000119844.15	AFTPH	protein_coding	5492.1	-0.652079	0.00177315	0.00926283	69.9089	aftiphilin [Source:HGNC Symbol;Acc:HGNC:25951]
ENSG00000119900.7	OGFRL1	protein_coding	4210.25	0.93683	1.84981e-07	6.24284e-06	49.3956	opioid growth factor receptor like 1 [Source:HGNC Symbol;Acc:HGNC:21378]
ENSG00000119906.11	SLF2	protein_coding	1777.97	0.703512	0.00733262	0.0273726	20.4555	SMC5-SMC6 complex localization factor 2 [Source:HGNC Symbol;Acc:HGNC:17814]
ENSG00000119950.20	MXI1	protein_coding	8219.42	-0.600932	0.0016745	0.00886365	122.89	MAX interactor 1, dimerization protein [Source:HGNC Symbol;Acc:HGNC:7534]
ENSG00000119965.12	C10orf88	protein_coding	369.24	0.813348	0.00612463	0.0239066	13.7375	chromosome 10 open reading frame 88 [Source:HGNC Symbol;Acc:HGNC:25822]
ENSG00000119986.6	AVPI1	protein_coding	2175.38	-1.40419	6.25397e-09	3.92516e-07	140.554	arginine vasopressin induced 1 [Source:HGNC Symbol;Acc:HGNC:30898]
ENSG00000120053.10	GOT1	protein_coding	1295.82	-0.648884	0.00115655	0.00662493	39.1413	glutamic-oxaloacetic transaminase 1 [Source:HGNC Symbol;Acc:HGNC:4432]
ENSG00000120063.9	GNA13	protein_coding	29300.2	-0.636698	0.00240137	0.0116513	421.664	G protein subunit alpha 13 [Source:HGNC Symbol;Acc:HGNC:4381]
ENSG00000120149.8	MSX2	protein_coding	1683.38	-0.674591	0.00486304	0.0199742	59.2117	msh homeobox 2 [Source:HGNC Symbol;Acc:HGNC:7392]
ENSG00000120262.9	CCDC170	protein_coding	3672.76	0.995301	0.000164545	0.00145072	80.0221	coiled-coil domain containing 170 [Source:HGNC Symbol;Acc:HGNC:21177]
ENSG00000120265.16	PCMT1	protein_coding	3436.11	-0.726675	0.00048086	0.00333203	91.2682	protein-L-isoaspartate (D-aspartate) O-methyltransferase [Source:HGNC Symbol;Acc:HGNC:8728]
ENSG00000120327.6	PCDHB14	protein_coding	506.731	0.652073	0.00986776	0.0344621	11.4661	protocadherin beta 14 [Source:HGNC Symbol;Acc:HGNC:8685]
ENSG00000120334.15	CENPL	protein_coding	1314.89	-0.78917	0.000346875	0.00257763	20.6673	centromere protein L [Source:HGNC Symbol;Acc:HGNC:17879]
ENSG00000120438.11	TCP1	protein_coding	7432.6	-0.603809	0.00296945	0.0137503	108.373	t-complex 1 [Source:HGNC Symbol;Acc:HGNC:11655]
ENSG00000120533.12	ENY2	protein_coding	5224.96	-0.778835	0.00247706	0.0119524	67.6867	ENY2, transcription and export complex 2 subunit [Source:HGNC Symbol;Acc:HGNC:24449]
ENSG00000120539.14	MASTL	protein_coding	2934.64	-0.727291	9.98832e-05	0.000989644	59.7909	microtubule associated serine/threonine kinase like [Source:HGNC Symbol;Acc:HGNC:19042]
ENSG00000120549.16	KIAA1217	protein_coding	3846.81	0.776084	0.000667076	0.00430601	37.5587	KIAA1217 [Source:HGNC Symbol;Acc:HGNC:25428]
ENSG00000120688.8	WBP4	protein_coding	668.363	0.687646	0.00157327	0.00843847	26.8659	WW domain binding protein 4 [Source:HGNC Symbol;Acc:HGNC:12739]
ENSG00000120690.14	ELF1	protein_coding	9356.74	-0.88677	1.0345e-05	0.0001632	166.597	E74 like ETS transcription factor 1 [Source:HGNC Symbol;Acc:HGNC:3316]
ENSG00000120708.16	TGFBI	protein_coding	20844.1	-0.785155	6.53578e-06	0.000112573	218.046	transforming growth factor beta induced [Source:HGNC Symbol;Acc:HGNC:11771]
ENSG00000120800.4	UTP20	protein_coding	1196.76	1.03737	6.47806e-07	1.75511e-05	13.1252	UTP20, small subunit processome component [Source:HGNC Symbol;Acc:HGNC:17897]
ENSG00000120802.13	TMPO	protein_coding	9367.89	-0.724944	4.63432e-05	0.000533727	82.8947	thymopoietin [Source:HGNC Symbol;Acc:HGNC:11875]
ENSG00000120832.9	MTERF2	protein_coding	868.787	0.836891	9.57288e-05	0.000954444	25.4451	mitochondrial transcription termination factor 2 [Source:HGNC Symbol;Acc:HGNC:30779]
ENSG00000120837.7	NFYB	protein_coding	2212.1	-0.780661	0.000578617	0.00385774	35.5009	nuclear transcription factor Y subunit beta [Source:HGNC Symbol;Acc:HGNC:7805]
ENSG00000120889.12	TNFRSF10B	protein_coding	9810.45	-0.675398	0.000454158	0.0031902	134.733	TNF receptor superfamily member 10b [Source:HGNC Symbol;Acc:HGNC:11905]
ENSG00000120925.13	RNF170	protein_coding	684.608	1.07317	0.000684324	0.00438812	12.4863	ring finger protein 170 [Source:HGNC Symbol;Acc:HGNC:25358]
ENSG00000120963.11	ZNF706	protein_coding	6857.15	-0.919888	7.00212e-05	0.000743145	79.1266	zinc finger protein 706 [Source:HGNC Symbol;Acc:HGNC:24992]
ENSG00000121058.4	COIL	protein_coding	5163	-0.732721	0.00120612	0.00684145	136.011	coilin [Source:HGNC Symbol;Acc:HGNC:2184]
ENSG00000121101.15	TEX14	protein_coding	102.086	0.930056	0.00694774	0.0262674	2.46937	testis expressed 14, intercellular bridge forming factor [Source:HGNC Symbol;Acc:HGNC:11737]
ENSG00000121211.7	MND1	protein_coding	403.604	-0.721421	0.00585972	0.0231301	21.1229	meiotic nuclear divisions 1 [Source:HGNC Symbol;Acc:HGNC:24839]
ENSG00000121274.12	PAPD5	protein_coding	1043.86	-0.649726	0.0025014	0.0120365	9.1007	terminal nucleotidyltransferase 4B [Source:HGNC Symbol;Acc:HGNC:30758]
ENSG00000121361.3	KCNJ8	protein_coding	76.7563	1.39715	0.000248862	0.00200469	4.47473	potassium voltage-gated channel subfamily J member 8 [Source:HGNC Symbol;Acc:HGNC:6269]
ENSG00000121578.12	B4GALT4	protein_coding	2291.03	-0.683588	0.000910848	0.00546697	22.5743	beta-1,4-galactosyltransferase 4 [Source:HGNC Symbol;Acc:HGNC:927]
ENSG00000121621.6	KIF18A	protein_coding	2198.45	-1.06799	3.68068e-08	1.65517e-06	37.6865	kinesin family member 18A [Source:HGNC Symbol;Acc:HGNC:29441]
ENSG00000121644.18	DESI2	protein_coding	2149.9	-0.615202	0.000945269	0.00562327	32.8019	desumoylating isopeptidase 2 [Source:HGNC Symbol;Acc:HGNC:24264]
ENSG00000121653.11	MAPK8IP1	protein_coding	450.158	0.884964	0.000119583	0.00113396	14.4965	mitogen-activated protein kinase 8 interacting protein 1 [Source:HGNC Symbol;Acc:HGNC:6882]
ENSG00000121671.11	CRY2	protein_coding	3628.1	-0.730732	0.000443999	0.00314096	43.9146	cryptochrome circadian regulator 2 [Source:HGNC Symbol;Acc:HGNC:2385]
ENSG00000121741.16	ZMYM2	protein_coding	19152.8	-0.649305	0.000513018	0.0035093	97.9322	zinc finger MYM-type containing 2 [Source:HGNC Symbol;Acc:HGNC:12989]
ENSG00000121851.12	POLR3GL	protein_coding	907.33	0.686094	0.00247544	0.0119479	49.5497	RNA polymerase III subunit G like [Source:HGNC Symbol;Acc:HGNC:28466]
ENSG00000121858.10	TNFSF10	protein_coding	238.267	1.14644	3.51526e-05	0.000427714	8.13715	TNF superfamily member 10 [Source:HGNC Symbol;Acc:HGNC:11925]
ENSG00000121903.14	ZSCAN20	protein_coding	328.637	1.1554	4.88364e-05	0.000556927	7.25391	zinc finger and SCAN domain containing 20 [Source:HGNC Symbol;Acc:HGNC:13093]
ENSG00000121966.6	CXCR4	protein_coding	3829.87	-1.11521	0.000110867	0.00107348	173.713	C-X-C motif chemokine receptor 4 [Source:HGNC Symbol;Acc:HGNC:2561]
ENSG00000121989.14	ACVR2A	protein_coding	1039.91	-0.657665	0.00187502	0.0096137	10.803	activin A receptor type 2A [Source:HGNC Symbol;Acc:HGNC:173]
ENSG00000122386.10	ZNF205	protein_coding	1153.38	0.711843	0.000524929	0.00357772	48.7668	zinc finger protein 205 [Source:HGNC Symbol;Acc:HGNC:12996]
ENSG00000122417.15	ODF2L	protein_coding	385.58	1.16953	3.04371e-05	0.000381787	4.31385	outer dense fiber of sperm tails 2 like [Source:HGNC Symbol;Acc:HGNC:29225]
ENSG00000122477.12	LRRC39	protein_coding	16.8067	1.39793	0.00496483	0.0203158	1.67607	leucine rich repeat containing 39 [Source:HGNC Symbol;Acc:HGNC:28228]
ENSG00000122507.20	BBS9	protein_coding	843.498	1.22458	2.16404e-07	7.09739e-06	16.2512	Bardet-Biedl syndrome 9 [Source:HGNC Symbol;Acc:HGNC:30000]
ENSG00000122547.10	EEPD1	protein_coding	329.124	-1.19298	6.63556e-06	0.000113842	5.60054	endonuclease/exonuclease/phosphatase family domain containing 1 [Source:HGNC Symbol;Acc:HGNC:22223]
ENSG00000122641.9	INHBA	protein_coding	500.938	1.42839	9.61248e-06	0.000153771	8.81583	inhibin subunit beta A [Source:HGNC Symbol;Acc:HGNC:6066]
ENSG00000122694.15	GLIPR2	protein_coding	57.3474	0.973451	0.0140257	0.0452539	2.60305	GLI pathogenesis related 2 [Source:HGNC Symbol;Acc:HGNC:18007]
ENSG00000122696.12	SLC25A51	protein_coding	455.369	-0.653532	0.00639968	0.0246875	9.39554	solute carrier family 25 member 51 [Source:HGNC Symbol;Acc:HGNC:23323]
ENSG00000122783.16	C7orf49	protein_coding	663.133	0.7035	0.0089318	0.0319218	14.1941	cell cycle regulator of NHEJ [Source:HGNC Symbol;Acc:HGNC:22432]
ENSG00000122884.12	P4HA1	protein_coding	21140.9	-0.648877	0.00306119	0.0140885	543.426	prolyl 4-hydroxylase subunit alpha 1 [Source:HGNC Symbol;Acc:HGNC:8546]
ENSG00000122912.14	SLC25A16	protein_coding	423.875	0.625115	0.00851534	0.0308433	5.56833	solute carrier family 25 member 16 [Source:HGNC Symbol;Acc:HGNC:10986]
ENSG00000122966.13	CIT	protein_coding	8309.82	-0.639097	0.000370976	0.00272195	50.7581	citron rho-interacting serine/threonine kinase [Source:HGNC Symbol;Acc:HGNC:1985]
ENSG00000123094.15	RASSF8	protein_coding	1470.15	0.663651	0.00113073	0.00650049	19.9439	Ras association domain family member 8 [Source:HGNC Symbol;Acc:HGNC:13232]
ENSG00000123104.11	ITPR2	protein_coding	1570.33	1.32348	4.05453e-09	2.78517e-07	14.7064	inositol 1,4,5-trisphosphate receptor type 2 [Source:HGNC Symbol;Acc:HGNC:6181]
ENSG00000123131.12	PRDX4	protein_coding	4234.4	0.730509	0.00043617	0.00309865	224.127	peroxiredoxin 4 [Source:HGNC Symbol;Acc:HGNC:17169]
ENSG00000123178.14	SPRYD7	protein_coding	912.521	-0.631241	0.00241548	0.0117037	20.4273	SPRY domain containing 7 [Source:HGNC Symbol;Acc:HGNC:14297]
ENSG00000123201.14	GUCY1B2	unitary_pseudogene	451.835	1.90812	3.3779e-10	3.38722e-08	16.4265	guanylate cyclase 1 soluble subunit beta 2 (pseudogene) [Source:HGNC Symbol;Acc:HGNC:4686]
ENSG00000123349.13	PFDN5	protein_coding	18491	-0.629006	0.00347383	0.0155374	412.737	prefoldin subunit 5 [Source:HGNC Symbol;Acc:HGNC:8869]
ENSG00000123358.19	NR4A1	protein_coding	1989.66	-0.922187	0.000199066	0.00167388	23.5049	nuclear receptor subfamily 4 group A member 1 [Source:HGNC Symbol;Acc:HGNC:7980]
ENSG00000123395.14	ATG101	protein_coding	2300.43	-0.643665	0.00103647	0.00606247	50.1111	autophagy related 101 [Source:HGNC Symbol;Acc:HGNC:25679]
ENSG00000123427.15	METTL21B	protein_coding	2666.75	-0.670077	0.000438896	0.00311058	60.0095	EEF1A lysine methyltransferase 3 [Source:HGNC Symbol;Acc:HGNC:24936]
ENSG00000123473.15	STIL	protein_coding	2473.94	-0.945407	3.22915e-07	9.88461e-06	28.5746	STIL, centriolar assembly protein [Source:HGNC Symbol;Acc:HGNC:10879]
ENSG00000123485.11	HJURP	protein_coding	4784.21	-1.04267	3.24089e-08	1.48808e-06	110.866	Holliday junction recognition protein [Source:HGNC Symbol;Acc:HGNC:25444]
ENSG00000123570.3	RAB9B	protein_coding	93.3887	1.57792	1.07313e-05	0.000168079	3.52776	RAB9B, member RAS oncogene family [Source:HGNC Symbol;Acc:HGNC:14090]
ENSG00000123572.16	NRK	protein_coding	86.6709	1.67358	3.9701e-05	0.000472512	1.38118	Nik related kinase [Source:HGNC Symbol;Acc:HGNC:25391]
ENSG00000123595.6	RAB9A	protein_coding	4407.3	-1.01043	8.5234e-05	0.000870195	200.903	RAB9A, member RAS oncogene family [Source:HGNC Symbol;Acc:HGNC:9792]
ENSG00000123600.18	METTL8	protein_coding	632.979	0.659626	0.00290123	0.0135205	6.19531	methyltransferase like 8 [Source:HGNC Symbol;Acc:HGNC:25856]
ENSG00000123607.14	TTC21B	protein_coding	3426.82	-0.672409	0.000328321	0.00247679	35.234	tetratricopeptide repeat domain 21B [Source:HGNC Symbol;Acc:HGNC:25660]
ENSG00000123609.10	NMI	protein_coding	193.967	1.36875	1.64046e-06	3.71725e-05	7.07698	N-myc and STAT interactor [Source:HGNC Symbol;Acc:HGNC:7854]
ENSG00000123737.12	EXOSC9	protein_coding	1120.92	-0.597416	0.00616388	0.0240276	17.1357	exosome component 9 [Source:HGNC Symbol;Acc:HGNC:9137]
ENSG00000123739.10	PLA2G12A	protein_coding	2666.39	0.595829	0.00161209	0.0085886	49.0167	phospholipase A2 group XIIA [Source:HGNC Symbol;Acc:HGNC:18554]
ENSG00000123870.10	ZNF137P	transcribed_unprocessed_pseudogene	285.951	1.03373	0.00293496	0.0136412	17.6877	zinc finger protein 137, pseudogene [Source:HGNC Symbol;Acc:HGNC:12921]
ENSG00000123933.14	MXD4	protein_coding	2715.33	0.942178	2.12775e-06	4.60037e-05	44.9088	MAX dimerization protein 4 [Source:HGNC Symbol;Acc:HGNC:13906]
ENSG00000123975.4	CKS2	protein_coding	7597.94	-1.70693	9.3601e-12	1.61698e-09	1279.98	CDC28 protein kinase regulatory subunit 2 [Source:HGNC Symbol;Acc:HGNC:2000]
ENSG00000124006.14	OBSL1	protein_coding	6006.18	1.01628	2.48313e-05	0.00032686	72.8678	obscurin like 1 [Source:HGNC Symbol;Acc:HGNC:29092]
ENSG00000124097.7	HMGB1P1	processed_pseudogene	37.6392	2.00679	1.78191e-05	0.000251138	10.2805	high mobility group box 1 pseudogene 1 [Source:HGNC Symbol;Acc:HGNC:4993]
ENSG00000124098.9	FAM210B	protein_coding	3682.98	1.16417	3.59964e-10	3.50874e-08	113.268	family with sequence similarity 210 member B [Source:HGNC Symbol;Acc:HGNC:16102]
ENSG00000124107.5	SLPI	protein_coding	64.7761	-1.03027	0.00806854	0.0295516	9.18665	secretory leukocyte peptidase inhibitor [Source:HGNC Symbol;Acc:HGNC:11092]
ENSG00000124120.10	TTPAL	protein_coding	457.717	1.4861	8.04985e-09	4.8987e-07	8.61181	alpha tocopherol transfer protein like [Source:HGNC Symbol;Acc:HGNC:16114]
ENSG00000124140.12	SLC12A5	protein_coding	679.564	0.629563	0.00283769	0.0133025	7.88723	solute carrier family 12 member 5 [Source:HGNC Symbol;Acc:HGNC:13818]
ENSG00000124160.11	NCOA5	protein_coding	1001.47	0.881223	0.000747706	0.00471655	38.5805	nuclear receptor coactivator 5 [Source:HGNC Symbol;Acc:HGNC:15909]
ENSG00000124171.8	PARD6B	protein_coding	32562.1	-1.10943	9.87185e-09	5.79946e-07	547.225	par-6 family cell polarity regulator beta [Source:HGNC Symbol;Acc:HGNC:16245]
ENSG00000124172.9	ATP5E	protein_coding	13878.9	-0.88929	5.51267e-05	0.000616176	222.927	ATP synthase F1 subunit epsilon [Source:HGNC Symbol;Acc:HGNC:838]
ENSG00000124216.3	SNAI1	protein_coding	156.107	1.02451	0.00124708	0.00701001	10.8769	snail family transcriptional repressor 1 [Source:HGNC Symbol;Acc:HGNC:11128]
ENSG00000124226.10	RNF114	protein_coding	16196.9	-0.617189	0.00306679	0.014102	276.4	ring finger protein 114 [Source:HGNC Symbol;Acc:HGNC:13094]
ENSG00000124243.17	BCAS4	protein_coding	4518.97	-0.899787	2.5343e-05	0.000330976	45.8232	breast carcinoma amplified sequence 4 [Source:HGNC Symbol;Acc:HGNC:14367]
ENSG00000124257.6	NEURL2	protein_coding	166.448	0.779547	0.0135653	0.0441064	13.2901	neuralized E3 ubiquitin protein ligase 2 [Source:HGNC Symbol;Acc:HGNC:16156]
ENSG00000124313.12	IQSEC2	protein_coding	2451.92	-0.622784	0.00123991	0.00697642	27.171	IQ motif and Sec7 domain 2 [Source:HGNC Symbol;Acc:HGNC:29059]
ENSG00000124380.10	SNRNP27	protein_coding	1548.59	-1.03465	2.26515e-06	4.82568e-05	55.677	small nuclear ribonucleoprotein U4/U6.U5 subunit 27 [Source:HGNC Symbol;Acc:HGNC:30240]
ENSG00000124406.16	ATP8A1	protein_coding	815.213	0.948769	0.000298271	0.00230025	7.70014	ATPase phospholipid transporting 8A1 [Source:HGNC Symbol;Acc:HGNC:13531]
ENSG00000124429.17	POF1B	protein_coding	1162.21	0.989401	0.000139104	0.00127674	31.1042	POF1B, actin binding protein [Source:HGNC Symbol;Acc:HGNC:13711]
ENSG00000124523.14	SIRT5	protein_coding	932.714	1.38357	2.59032e-07	8.21744e-06	20.9095	sirtuin 5 [Source:HGNC Symbol;Acc:HGNC:14933]
ENSG00000124535.15	WRNIP1	protein_coding	6080.25	-0.671668	0.000234629	0.00191478	115.971	Werner helicase interacting protein 1 [Source:HGNC Symbol;Acc:HGNC:20876]
ENSG00000124593.14	PRICKLE4	protein_coding	94.93	0.972806	0.00450961	0.0189417	2.287	novel transcript
ENSG00000124613.8	ZNF391	protein_coding	241.279	1.4535	6.87628e-06	0.000117395	6.53747	zinc finger protein 391 [Source:HGNC Symbol;Acc:HGNC:18779]
ENSG00000124635.8	HIST1H2BJ	protein_coding	383.356	-1.12033	0.00149414	0.00811383	44.9827	histone cluster 1 H2B family member j [Source:HGNC Symbol;Acc:HGNC:4761]
ENSG00000124641.14	MED20	protein_coding	1851.4	-0.680724	0.00379944	0.0166147	44.8537	mediator complex subunit 20 [Source:HGNC Symbol;Acc:HGNC:16840]
ENSG00000124733.3	MEA1	protein_coding	4990.08	-0.688205	0.000681177	0.00437543	335.021	male-enhanced antigen 1 [Source:HGNC Symbol;Acc:HGNC:6986]
ENSG00000124743.5	KLHL31	protein_coding	22.8521	1.34674	0.00523804	0.0212014	1.71611	kelch like family member 31 [Source:HGNC Symbol;Acc:HGNC:21353]
ENSG00000124749.16	COL21A1	protein_coding	153.48	0.844443	0.00535626	0.0215526	2.54763	collagen type XXI alpha 1 chain [Source:HGNC Symbol;Acc:HGNC:17025]
ENSG00000124762.13	CDKN1A	protein_coding	12855.5	-0.732878	0.000198583	0.00167113	307.234	cyclin dependent kinase inhibitor 1A [Source:HGNC Symbol;Acc:HGNC:1784]
ENSG00000124783.12	SSR1	protein_coding	14218.6	-0.92127	1.89834e-06	4.20433e-05	94.6588	signal sequence receptor subunit 1 [Source:HGNC Symbol;Acc:HGNC:11323]
ENSG00000124784.8	RIOK1	protein_coding	1684.7	-0.787862	0.000110106	0.00106789	37.6246	RIO kinase 1 [Source:HGNC Symbol;Acc:HGNC:18656]
ENSG00000124789.11	NUP153	protein_coding	8957.24	-0.70617	0.000526438	0.00358381	120.656	nucleoporin 153 [Source:HGNC Symbol;Acc:HGNC:8062]
ENSG00000125148.6	MT2A	protein_coding	14655.3	-1.60171	9.82512e-10	8.24177e-08	1199.57	metallothionein 2A [Source:HGNC Symbol;Acc:HGNC:7406]
ENSG00000125149.11	C16orf70	protein_coding	949.575	-0.652558	0.00331871	0.014978	11.6304	chromosome 16 open reading frame 70 [Source:HGNC Symbol;Acc:HGNC:29564]
ENSG00000125170.10	DOK4	protein_coding	465.004	0.665634	0.00330296	0.0149282	9.51351	docking protein 4 [Source:HGNC Symbol;Acc:HGNC:19868]
ENSG00000125247.15	TMTC4	protein_coding	249.943	1.1166	0.000445974	0.00315001	5.13127	transmembrane and tetratricopeptide repeat containing 4 [Source:HGNC Symbol;Acc:HGNC:25904]
ENSG00000125319.14	C17orf53	protein_coding	751.29	-0.674241	0.00140699	0.00775643	18.2864	chromosome 17 open reading frame 53 [Source:HGNC Symbol;Acc:HGNC:28460]
ENSG00000125347.13	IRF1	protein_coding	1480.3	-0.948505	4.46094e-05	0.00051912	15.8559	interferon regulatory factor 1 [Source:HGNC Symbol;Acc:HGNC:6116]
ENSG00000125351.10	UPF3B	protein_coding	1918.88	-0.736219	0.000494947	0.00340945	56.6408	UPF3B, regulator of nonsense mediated mRNA decay [Source:HGNC Symbol;Acc:HGNC:20439]
ENSG00000125352.5	RNF113A	protein_coding	4030.1	-0.936921	6.49342e-05	0.000698934	253.958	ring finger protein 113A [Source:HGNC Symbol;Acc:HGNC:12974]
ENSG00000125356.6	NDUFA1	protein_coding	5084.85	-0.815085	0.000348227	0.00258471	541.144	NADH:ubiquinone oxidoreductase subunit A1 [Source:HGNC Symbol;Acc:HGNC:7683]
ENSG00000125375.14	ATP5S	protein_coding	1440.62	0.801944	0.000324046	0.00245397	14.1928	distal membrane arm assembly complex 2 like [Source:HGNC Symbol;Acc:HGNC:18799]
ENSG00000125398.5	SOX9	protein_coding	8287.02	1.23653	2.23954e-10	2.33985e-08	246.636	SRY-box 9 [Source:HGNC Symbol;Acc:HGNC:11204]
ENSG00000125430.8	HS3ST3B1	protein_coding	607.444	-0.787998	0.000500031	0.00343892	10.2509	heparan sulfate-glucosamine 3-sulfotransferase 3B1 [Source:HGNC Symbol;Acc:HGNC:5198]
ENSG00000125447.16	GGA3	protein_coding	3107.57	-0.81273	0.000294343	0.00227747	37.76	golgi associated, gamma adaptin ear containing, ARF binding protein 3 [Source:HGNC Symbol;Acc:HGNC:17079]
ENSG00000125459.14	MSTO1	protein_coding	132.582	1.18473	0.000292809	0.00227065	3.84996	misato 1, mitochondrial distribution and morphology regulator [Source:HGNC Symbol;Acc:HGNC:29678]
ENSG00000125520.13	SLC2A4RG	protein_coding	7664.12	-0.628309	0.000650803	0.00422756	241.706	SLC2A4 regulator [Source:HGNC Symbol;Acc:HGNC:15930]
ENSG00000125611.15	CHCHD5	protein_coding	1348.26	-0.821383	0.000144157	0.00131345	26.9288	coiled-coil-helix-coiled-coil-helix domain containing 5 [Source:HGNC Symbol;Acc:HGNC:17840]
ENSG00000125629.14	INSIG2	protein_coding	6725.43	-0.833967	6.89581e-06	0.000117613	128.906	insulin induced gene 2 [Source:HGNC Symbol;Acc:HGNC:20452]
ENSG00000125656.8	CLPP	protein_coding	2138.95	-0.674203	0.000599861	0.00396305	66.8722	caseinolytic mitochondrial matrix peptidase proteolytic subunit [Source:HGNC Symbol;Acc:HGNC:2084]
ENSG00000125731.12	SH2D3A	protein_coding	1912.68	-1.0317	5.54254e-06	9.90843e-05	28.386	SH2 domain containing 3A [Source:HGNC Symbol;Acc:HGNC:16885]
ENSG00000125733.17	TRIP10	protein_coding	4020.14	-1.11255	5.43219e-06	9.78131e-05	90.5151	thyroid hormone receptor interactor 10 [Source:HGNC Symbol;Acc:HGNC:12304]
ENSG00000125740.13	FOSB	protein_coding	351.747	1.27884	6.15337e-07	1.68282e-05	7.66253	FosB proto-oncogene, AP-1 transcription factor subunit [Source:HGNC Symbol;Acc:HGNC:3797]
ENSG00000125743.10	SNRPD2	protein_coding	12522.4	-0.621438	0.00354862	0.0157829	579.058	small nuclear ribonucleoprotein D2 polypeptide [Source:HGNC Symbol;Acc:HGNC:11159]
ENSG00000125746.14	EML2	protein_coding	2965.65	-0.929864	5.79106e-06	0.000102063	27.0153	echinoderm microtubule associated protein like 2 [Source:HGNC Symbol;Acc:HGNC:18035]
ENSG00000125775.14	SDCBP2	protein_coding	361.164	-0.997814	5.80795e-05	0.000642658	10.9523	syndecan binding protein 2 [Source:HGNC Symbol;Acc:HGNC:15756]
ENSG00000125814.17	NAPB	protein_coding	1696.48	-0.585398	0.0106916	0.0366315	24.8011	NSF attachment protein beta [Source:HGNC Symbol;Acc:HGNC:15751]
ENSG00000125817.7	CENPB	protein_coding	3970.7	0.710792	0.00424126	0.0180712	152.741	centromere protein B [Source:HGNC Symbol;Acc:HGNC:1852]
ENSG00000125826.19	RBCK1	protein_coding	29458.5	-0.965084	2.54135e-06	5.25996e-05	578.507	RANBP2-type and C3HC4-type zinc finger containing 1 [Source:HGNC Symbol;Acc:HGNC:15864]
ENSG00000125843.10	AP5S1	protein_coding	678.707	0.782685	0.00150035	0.00813491	14.0713	adaptor related protein complex 5 subunit sigma 1 [Source:HGNC Symbol;Acc:HGNC:15875]
ENSG00000125848.9	FLRT3	protein_coding	1737.42	1.33001	3.07033e-07	9.46486e-06	44.541	fibronectin leucine rich transmembrane protein 3 [Source:HGNC Symbol;Acc:HGNC:3762]
ENSG00000125864.11	BFSP1	protein_coding	171.441	1.02374	0.000779692	0.00487426	6.44064	beaded filament structural protein 1 [Source:HGNC Symbol;Acc:HGNC:1040]
ENSG00000125875.13	TBC1D20	protein_coding	5287.67	-0.997391	4.89318e-08	2.10356e-06	73.0857	TBC1 domain family member 20 [Source:HGNC Symbol;Acc:HGNC:16133]
ENSG00000125877.12	ITPA	protein_coding	866.302	0.941224	9.31153e-06	0.000149773	46.0938	inosine triphosphatase [Source:HGNC Symbol;Acc:HGNC:6176]
ENSG00000125898.12	FAM110A	protein_coding	2170.72	-0.847999	0.000108972	0.00105984	64.1054	family with sequence similarity 110 member A [Source:HGNC Symbol;Acc:HGNC:16188]
ENSG00000125944.18	HNRNPR	protein_coding	6605.77	-0.7218	6.19796e-05	0.000673652	57.2228	heterogeneous nuclear ribonucleoprotein R [Source:HGNC Symbol;Acc:HGNC:5047]
ENSG00000125952.18	MAX	protein_coding	3338.84	-0.774178	0.000222797	0.00183339	57.6675	MYC associated factor X [Source:HGNC Symbol;Acc:HGNC:6913]
ENSG00000125995.15	ROMO1	protein_coding	2067.85	-0.792521	0.000285096	0.0022203	228.088	reactive oxygen species modulator 1 [Source:HGNC Symbol;Acc:HGNC:16185]
ENSG00000126005.16	MMP24-AS1	protein_coding	2124.19	-0.811978	0.000399861	0.00288535	31.2714	MMP24 opposite strand [Source:HGNC Symbol;Acc:HGNC:44421]
ENSG00000126012.11	KDM5C	protein_coding	13499.7	-1.09218	1.66729e-07	5.68181e-06	142.109	lysine demethylase 5C [Source:HGNC Symbol;Acc:HGNC:11114]
ENSG00000126016.13	AMOT	protein_coding	1653.82	0.682269	0.000677782	0.00435738	19.2431	angiomotin [Source:HGNC Symbol;Acc:HGNC:17810]
ENSG00000126067.11	PSMB2	protein_coding	3602.25	-0.735098	0.000282124	0.00220049	94.0467	proteasome subunit beta 2 [Source:HGNC Symbol;Acc:HGNC:9539]
ENSG00000126215.13	XRCC3	protein_coding	581.523	-0.694459	0.00188981	0.00966396	5.78395	X-ray repair cross complementing 3 [Source:HGNC Symbol;Acc:HGNC:12830]
ENSG00000126216.12	TUBGCP3	protein_coding	1736.69	-0.688933	0.000277312	0.00216878	18.6842	tubulin gamma complex associated protein 3 [Source:HGNC Symbol;Acc:HGNC:18598]
ENSG00000126226.21	PCID2	protein_coding	2861.69	-0.996717	5.80927e-07	1.61145e-05	35.2849	PCI domain containing 2 [Source:HGNC Symbol;Acc:HGNC:25653]
ENSG00000126267.8	COX6B1	protein_coding	8899.12	-0.685605	0.00125959	0.00706668	719.788	cytochrome c oxidase subunit 6B1 [Source:HGNC Symbol;Acc:HGNC:2280]
ENSG00000126368.5	NR1D1	protein_coding	1789.27	-1.61833	3.01453e-08	1.41391e-06	71.4684	nuclear receptor subfamily 1 group D member 1 [Source:HGNC Symbol;Acc:HGNC:7962]
ENSG00000126453.9	BCL2L12	protein_coding	996.528	-0.820497	5.05962e-05	0.00057362	43.6229	BCL2 like 12 [Source:HGNC Symbol;Acc:HGNC:13787]
ENSG00000126458.3	RRAS	protein_coding	5372.63	-0.798866	0.000244772	0.00197905	356.823	RAS related [Source:HGNC Symbol;Acc:HGNC:10447]
ENSG00000126583.10	PRKCG	protein_coding	193.746	-1.4042	4.21673e-06	7.95389e-05	5.45071	protein kinase C gamma [Source:HGNC Symbol;Acc:HGNC:9402]
ENSG00000126602.10	TRAP1	protein_coding	8462.7	-0.591166	0.00174572	0.00915793	113.246	TNF receptor associated protein 1 [Source:HGNC Symbol;Acc:HGNC:16264]
ENSG00000126603.8	GLIS2	protein_coding	4904.17	-1.31778	6.49929e-11	8.33821e-09	93.0823	GLIS family zinc finger 2 [Source:HGNC Symbol;Acc:HGNC:29450]
ENSG00000126705.13	AHDC1	protein_coding	11269	-1.3812	3.207e-11	4.47646e-09	141.421	AT-hook DNA binding motif containing 1 [Source:HGNC Symbol;Acc:HGNC:25230]
ENSG00000126767.17	ELK1	protein_coding	3430.17	-0.900442	1.01404e-05	0.000160262	77.9129	ELK1, ETS transcription factor [Source:HGNC Symbol;Acc:HGNC:3321]
ENSG00000126768.12	TIMM17B	protein_coding	2412.19	-1.04416	1.58681e-06	3.64298e-05	77.0919	translocase of inner mitochondrial membrane 17B [Source:HGNC Symbol;Acc:HGNC:17310]
ENSG00000126787.12	DLGAP5	protein_coding	5541.59	-1.29955	4.90448e-11	6.43408e-09	126.619	DLG associated protein 5 [Source:HGNC Symbol;Acc:HGNC:16864]
ENSG00000126790.11	L3HYPDH	protein_coding	464.596	0.629387	0.0105242	0.0361773	13.7875	trans-L-3-hydroxyproline dehydratase [Source:HGNC Symbol;Acc:HGNC:20488]
ENSG00000126821.7	SGPP1	protein_coding	523.416	-1.10793	3.24771e-06	6.38851e-05	12.7011	sphingosine-1-phosphate phosphatase 1 [Source:HGNC Symbol;Acc:HGNC:17720]
ENSG00000126858.16	RHOT1	protein_coding	2890.82	-0.852861	3.84088e-05	0.000459158	33.9987	ras homolog family member T1 [Source:HGNC Symbol;Acc:HGNC:21168]
ENSG00000126882.12	FAM78A	protein_coding	38.7761	1.78845	7.68957e-05	0.000800523	1.09653	family with sequence similarity 78 member A [Source:HGNC Symbol;Acc:HGNC:25465]
ENSG00000127022.14	CANX	protein_coding	92211.8	-0.653854	0.000585247	0.00388857	1028.4	calnexin [Source:HGNC Symbol;Acc:HGNC:1473]
ENSG00000127080.9	IPPK	protein_coding	1221.67	-0.858897	5.10561e-05	0.000578459	17.9401	inositol-pentakisphosphate 2-kinase [Source:HGNC Symbol;Acc:HGNC:14645]
ENSG00000127084.17	FGD3	protein_coding	87.1213	0.860413	0.013969	0.0451185	1.68714	FYVE, RhoGEF and PH domain containing 3 [Source:HGNC Symbol;Acc:HGNC:16027]
ENSG00000127129.9	EDN2	protein_coding	2029.9	-2.70182	3.47236e-36	3.02929e-32	125.761	endothelin 2 [Source:HGNC Symbol;Acc:HGNC:3177]
ENSG00000127152.17	BCL11B	protein_coding	317.138	0.785519	0.00423166	0.0180391	4.54112	B cell CLL/lymphoma 11B [Source:HGNC Symbol;Acc:HGNC:13222]
ENSG00000127184.10	COX7C	protein_coding	13245.3	-0.682358	0.00117838	0.006729	500.935	cytochrome c oxidase subunit 7C [Source:HGNC Symbol;Acc:HGNC:2292]
ENSG00000127191.17	TRAF2	protein_coding	1833.49	-0.703353	0.000396379	0.00286382	35.3093	TNF receptor associated factor 2 [Source:HGNC Symbol;Acc:HGNC:12032]
ENSG00000127314.17	RAP1B	protein_coding	2757.62	-0.982618	4.02726e-05	0.000478337	14.2473	RAP1B, member of RAS oncogene family [Source:HGNC Symbol;Acc:HGNC:9857]
ENSG00000127334.10	DYRK2	protein_coding	6626.96	-0.94324	2.77743e-07	8.71592e-06	55.818	dual specificity tyrosine phosphorylation regulated kinase 2 [Source:HGNC Symbol;Acc:HGNC:3093]
ENSG00000127445.13	PIN1	protein_coding	1146.68	-0.744053	0.000642216	0.00418268	18.7456	peptidylprolyl cis/trans isomerase, NIMA-interacting 1 [Source:HGNC Symbol;Acc:HGNC:8988]
ENSG00000127452.8	FBXL12	protein_coding	1293.04	-0.590758	0.010816	0.0369147	33.6263	F-box and leucine rich repeat protein 12 [Source:HGNC Symbol;Acc:HGNC:13611]
ENSG00000127481.14	UBR4	protein_coding	14452.1	-0.652281	0.000643082	0.00418363	41.0883	ubiquitin protein ligase E3 component n-recognin 4 [Source:HGNC Symbol;Acc:HGNC:30313]
ENSG00000127483.17	HP1BP3	protein_coding	15070.7	-0.598666	0.0011482	0.00659223	140.222	heterochromatin protein 1 binding protein 3 [Source:HGNC Symbol;Acc:HGNC:24973]
ENSG00000127528.5	KLF2	protein_coding	122.449	1.30931	5.82089e-05	0.000642658	8.02807	Kruppel like factor 2 [Source:HGNC Symbol;Acc:HGNC:6347]
ENSG00000127540.11	UQCR11	protein_coding	1019.01	-0.879026	0.000145581	0.00132434	38.2747	ubiquinol-cytochrome c reductase, complex III subunit XI [Source:HGNC Symbol;Acc:HGNC:30862]
ENSG00000127586.16	CHTF18	protein_coding	1443.25	-0.591555	0.00877331	0.0314746	20.0072	chromosome transmission fidelity factor 18 [Source:HGNC Symbol;Acc:HGNC:18435]
ENSG00000127663.14	KDM4B	protein_coding	5852.33	-0.737254	5.81333e-05	0.000642658	29.5522	lysine demethylase 4B [Source:HGNC Symbol;Acc:HGNC:29136]
ENSG00000127666.9	TICAM1	protein_coding	852.146	-0.813867	0.000125473	0.00118146	23.1937	toll like receptor adaptor molecule 1 [Source:HGNC Symbol;Acc:HGNC:18348]
ENSG00000127824.13	TUBA4A	protein_coding	635.288	-0.708504	0.00168964	0.00892278	11.194	tubulin alpha 4a [Source:HGNC Symbol;Acc:HGNC:12407]
ENSG00000127838.13	PNKD	protein_coding	10906.4	-0.959052	8.58662e-08	3.32082e-06	174.837	PNKD, MBL domain containing [Source:HGNC Symbol;Acc:HGNC:9153]
ENSG00000127922.9	SHFM1	protein_coding	6160	-0.751266	0.00118622	0.00675718	43.687	SEM1, 26S proteasome complex subunit [Source:HGNC Symbol;Acc:HGNC:10845]
ENSG00000127995.16	CASD1	protein_coding	1347.96	0.64083	0.00308059	0.0141485	26.4214	CAS1 domain containing 1 [Source:HGNC Symbol;Acc:HGNC:16014]
ENSG00000128000.15	ZNF780B	protein_coding	1692.1	1.54823	2.05893e-08	1.02348e-06	25.1279	zinc finger protein 780B [Source:HGNC Symbol;Acc:HGNC:33109]
ENSG00000128016.5	ZFP36	protein_coding	9529.97	-0.611714	0.003021	0.0139482	340.5	ZFP36 ring finger protein [Source:HGNC Symbol;Acc:HGNC:12862]
ENSG00000128039.10	SRD5A3	protein_coding	6451.93	-0.615519	0.000690327	0.00441688	112.322	steroid 5 alpha-reductase 3 [Source:HGNC Symbol;Acc:HGNC:25812]
ENSG00000128059.8	PPAT	protein_coding	1762.78	-1.04329	5.04217e-06	9.19287e-05	27.4745	phosphoribosyl pyrophosphate amidotransferase [Source:HGNC Symbol;Acc:HGNC:9238]
ENSG00000128165.8	ADM2	protein_coding	241.367	0.903983	0.0019368	0.00986666	5.96344	adrenomedullin 2 [Source:HGNC Symbol;Acc:HGNC:28898]
ENSG00000128422.15	KRT17	protein_coding	248.131	-2.11991	2.20367e-13	6.86601e-11	10.1065	keratin 17 [Source:HGNC Symbol;Acc:HGNC:6427]
ENSG00000128567.16	PODXL	protein_coding	4651.67	1.07328	6.92004e-07	1.83776e-05	82.4246	podocalyxin like [Source:HGNC Symbol;Acc:HGNC:9171]
ENSG00000128590.4	DNAJB9	protein_coding	3249.91	-1.09058	1.32358e-05	0.00019806	105.488	DnaJ heat shock protein family (Hsp40) member B9 [Source:HGNC Symbol;Acc:HGNC:6968]
ENSG00000128606.12	LRRC17	protein_coding	23.7243	1.70593	0.000581138	0.00386946	1.79312	leucine rich repeat containing 17 [Source:HGNC Symbol;Acc:HGNC:16895]
ENSG00000128683.13	GAD1	protein_coding	1541.47	-0.832486	4.34284e-05	0.00051095	13.7966	glutamate decarboxylase 1 [Source:HGNC Symbol;Acc:HGNC:4092]
ENSG00000128791.11	TWSG1	protein_coding	1427.13	-0.695947	0.000341336	0.00255092	25.5232	twisted gastrulation BMP signaling modulator 1 [Source:HGNC Symbol;Acc:HGNC:12429]
ENSG00000128923.10	FAM63B	protein_coding	3180.27	-0.665026	0.000696371	0.00445008	23.8141	MINDY lysine 48 deubiquitinase 2 [Source:HGNC Symbol;Acc:HGNC:26954]
ENSG00000128989.10	ARPP19	protein_coding	19783.4	-0.741676	4.90071e-05	0.000558144	210.428	cAMP regulated phosphoprotein 19 [Source:HGNC Symbol;Acc:HGNC:16967]
ENSG00000129007.14	CALML4	protein_coding	303.015	0.743758	0.00328571	0.0148791	6.41316	calmodulin like 4 [Source:HGNC Symbol;Acc:HGNC:18445]
ENSG00000129038.15	LOXL1	protein_coding	5033.13	-0.780175	9.17034e-05	0.000922745	122.881	lysyl oxidase like 1 [Source:HGNC Symbol;Acc:HGNC:6665]
ENSG00000129158.10	SERGEF	protein_coding	1070.21	-0.709173	0.000855848	0.00522101	21.8694	secretion regulating guanine nucleotide exchange factor [Source:HGNC Symbol;Acc:HGNC:17499]
ENSG00000129195.15	FAM64A	protein_coding	1993.42	-0.601753	0.00446696	0.0187987	60.3564	PICALM interacting mitotic regulator [Source:HGNC Symbol;Acc:HGNC:25483]
ENSG00000129235.10	TXNDC17	protein_coding	1976.68	-0.649179	0.00185165	0.0095387	37.9382	thioredoxin domain containing 17 [Source:HGNC Symbol;Acc:HGNC:28218]
ENSG00000129250.11	KIF1C	protein_coding	3889.05	0.58746	0.00188842	0.00966252	43.4114	kinesin family member 1C [Source:HGNC Symbol;Acc:HGNC:6317]
ENSG00000129355.6	CDKN2D	protein_coding	983.764	-1.9321	4.10439e-14	1.52369e-11	68.1484	cyclin dependent kinase inhibitor 2D [Source:HGNC Symbol;Acc:HGNC:1790]
ENSG00000129460.15	NGDN	protein_coding	2207.73	-0.829669	0.00105375	0.00613417	41.2909	neuroguidin [Source:HGNC Symbol;Acc:HGNC:20271]
ENSG00000129472.12	RAB2B	protein_coding	1958.79	-0.735752	0.000759986	0.00477846	41.6719	RAB2B, member RAS oncogene family [Source:HGNC Symbol;Acc:HGNC:20246]
ENSG00000129473.9	BCL2L2	protein_coding	5035.46	-0.903981	9.12791e-05	0.000919883	101.344	BCL2 like 2 [Source:HGNC Symbol;Acc:HGNC:995]
ENSG00000129484.13	PARP2	protein_coding	3657.26	-0.945205	2.44474e-05	0.000322906	74.3189	poly(ADP-ribose) polymerase 2 [Source:HGNC Symbol;Acc:HGNC:272]
ENSG00000129493.14	HEATR5A	protein_coding	282.417	1.444	2.61603e-06	5.37179e-05	3.63846	HEAT repeat containing 5A [Source:HGNC Symbol;Acc:HGNC:20276]
ENSG00000129514.5	FOXA1	protein_coding	25151.5	-0.598764	0.000641296	0.0041798	462.986	forkhead box A1 [Source:HGNC Symbol;Acc:HGNC:5021]
ENSG00000129595.12	EPB41L4A	protein_coding	1035.17	1.33084	8.12144e-08	3.17719e-06	15.1327	erythrocyte membrane protein band 4.1 like 4A [Source:HGNC Symbol;Acc:HGNC:13278]
ENSG00000129636.12	ITFG1	protein_coding	2305.77	-0.625768	0.00121303	0.00687171	21.4793	integrin alpha FG-GAP repeat containing 1 [Source:HGNC Symbol;Acc:HGNC:30697]
ENSG00000129696.12	TTI2	protein_coding	428.911	-0.752464	0.00348491	0.015574	8.98062	TELO2 interacting protein 2 [Source:HGNC Symbol;Acc:HGNC:26262]
ENSG00000129810.14	SGOL1	protein_coding	1699.94	-0.843176	1.74598e-05	0.000247473	39.037	shugoshin 1 [Source:HGNC Symbol;Acc:HGNC:25088]
ENSG00000129932.7	DOHH	protein_coding	375.141	-1.06932	8.48836e-05	0.000867124	14.0616	deoxyhypusine hydroxylase [Source:HGNC Symbol;Acc:HGNC:28662]
ENSG00000129951.18	PLPPR3	protein_coding	95.5865	0.966459	0.00466651	0.0193999	3.81664	phospholipid phosphatase related 3 [Source:HGNC Symbol;Acc:HGNC:23497]
ENSG00000130021.13	PUDP	protein_coding	3017.66	-0.752219	5.36295e-05	0.000602141	85.1877	pseudouridine 5'-phosphatase [Source:HGNC Symbol;Acc:HGNC:16818]
ENSG00000130038.9	CRACR2A	protein_coding	401.821	0.803567	0.00447711	0.0188369	3.35095	calcium release activated channel regulator 2A [Source:HGNC Symbol;Acc:HGNC:28657]
ENSG00000130066.16	SAT1	protein_coding	16987.6	-1.0277	2.88424e-05	0.000366795	614.226	spermidine/spermine N1-acetyltransferase 1 [Source:HGNC Symbol;Acc:HGNC:10540]
ENSG00000130164.11	LDLR	protein_coding	14988.2	-0.84752	2.19687e-05	0.00029691	148.977	low density lipoprotein receptor [Source:HGNC Symbol;Acc:HGNC:6547]
ENSG00000130165.10	ELOF1	protein_coding	3079.14	-0.624925	0.00138135	0.0076368	51.2762	elongation factor 1 homolog [Source:HGNC Symbol;Acc:HGNC:28691]
ENSG00000130203.9	APOE	protein_coding	108.041	-0.947019	0.00627822	0.0243481	4.08368	apolipoprotein E [Source:HGNC Symbol;Acc:HGNC:613]
ENSG00000130222.10	GADD45G	protein_coding	1201.85	-1.13835	0.000125139	0.0011796	94.1465	growth arrest and DNA damage inducible gamma [Source:HGNC Symbol;Acc:HGNC:4097]
ENSG00000130234.10	ACE2	protein_coding	75.0252	1.06681	0.00408308	0.0175819	2.38708	angiotensin I converting enzyme 2 [Source:HGNC Symbol;Acc:HGNC:13557]
ENSG00000130254.11	SAFB2	protein_coding	4241.05	-1.14163	1.63119e-06	3.70958e-05	61.8455	scaffold attachment factor B2 [Source:HGNC Symbol;Acc:HGNC:21605]
ENSG00000130255.12	RPL36	protein_coding	29028.7	-0.649954	0.00146286	0.00799872	943.144	ribosomal protein L36 [Source:HGNC Symbol;Acc:HGNC:13631]
ENSG00000130303.12	BST2	protein_coding	153.831	1.04664	0.0012319	0.0069484	18.503	bone marrow stromal cell antigen 2 [Source:HGNC Symbol;Acc:HGNC:1119]
ENSG00000130305.16	NSUN5	protein_coding	858.944	-0.8148	0.000181446	0.00156648	18.7171	NOP2/Sun RNA methyltransferase family member 5 [Source:HGNC Symbol;Acc:HGNC:16385]
ENSG00000130311.10	DDA1	protein_coding	1418.64	-0.775593	0.00023787	0.001934	22.969	DET1 and DDB1 associated 1 [Source:HGNC Symbol;Acc:HGNC:28360]
ENSG00000130312.6	MRPL34	protein_coding	857.286	-1.14252	8.39075e-07	2.15061e-05	43.2469	mitochondrial ribosomal protein L34 [Source:HGNC Symbol;Acc:HGNC:14488]
ENSG00000130347.12	RTN4IP1	protein_coding	101.615	0.928554	0.0109382	0.037239	6.6981	reticulon 4 interacting protein 1 [Source:HGNC Symbol;Acc:HGNC:18647]
ENSG00000130349.9	C6orf203	protein_coding	413.121	0.773794	0.00296465	0.0137353	21.8017	chromosome 6 open reading frame 203 [Source:HGNC Symbol;Acc:HGNC:17971]
ENSG00000130402.11	ACTN4	protein_coding	36019.3	-0.946972	8.71068e-08	3.34362e-06	467.158	actinin alpha 4 [Source:HGNC Symbol;Acc:HGNC:166]
ENSG00000130449.5	ZSWIM6	protein_coding	2603.78	-0.803094	5.72743e-05	0.000636106	34.9939	zinc finger SWIM-type containing 6 [Source:HGNC Symbol;Acc:HGNC:29316]
ENSG00000130513.6	GDF15	protein_coding	18143.8	-1.53408	1.48292e-11	2.37377e-09	803.335	growth differentiation factor 15 [Source:HGNC Symbol;Acc:HGNC:30142]
ENSG00000130518.16	KIAA1683	protein_coding	1916.42	1.3555	0.00342004	0.015348	28.4785	IQ motif containing N [Source:HGNC Symbol;Acc:HGNC:29350]
ENSG00000130520.10	LSM4	protein_coding	3874.27	-1.02792	8.23968e-07	2.12357e-05	103.805	LSM4 homolog, U6 small nuclear RNA and mRNA degradation associated [Source:HGNC Symbol;Acc:HGNC:17259]
ENSG00000130522.5	JUND	protein_coding	18843.9	-0.655833	0.00512887	0.0208452	814.301	JunD proto-oncogene, AP-1 transcription factor subunit [Source:HGNC Symbol;Acc:HGNC:6206]
ENSG00000130544.11	ZNF557	protein_coding	272.689	0.682476	0.00849548	0.0307977	4.6207	zinc finger protein 557 [Source:HGNC Symbol;Acc:HGNC:28632]
ENSG00000130545.15	CRB3	protein_coding	1655.36	-0.803573	0.000254715	0.00204334	80.7798	crumbs 3, cell polarity complex component [Source:HGNC Symbol;Acc:HGNC:20237]
ENSG00000130589.16	HELZ2	protein_coding	12792.3	0.717806	0.00118495	0.00675653	106.469	helicase with zinc finger 2 [Source:HGNC Symbol;Acc:HGNC:30021]
ENSG00000130600.15	H19	processed_transcript	1067.17	-1.84688	6.45478e-18	5.92752e-15	34.012	H19, imprinted maternally expressed transcript [Source:HGNC Symbol;Acc:HGNC:4713]
ENSG00000130635.15	COL5A1	protein_coding	5161.75	1.16104	1.60711e-08	8.49722e-07	57.3125	collagen type V alpha 1 chain [Source:HGNC Symbol;Acc:HGNC:2209]
ENSG00000130653.15	PNPLA7	protein_coding	3285.81	0.79198	2.01981e-05	0.000277494	36.6053	patatin like phospholipase domain containing 7 [Source:HGNC Symbol;Acc:HGNC:24768]
ENSG00000130669.17	PAK4	protein_coding	9027.62	-0.962716	2.49804e-06	5.20469e-05	99.9735	p21 (RAC1) activated kinase 4 [Source:HGNC Symbol;Acc:HGNC:16059]
ENSG00000130695.13	CEP85	protein_coding	1851.48	-0.798556	3.95358e-05	0.000471189	27.623	centrosomal protein 85 [Source:HGNC Symbol;Acc:HGNC:25309]
ENSG00000130713.15	EXOSC2	protein_coding	2546.35	0.807779	0.00032216	0.00244577	65.8966	exosome component 2 [Source:HGNC Symbol;Acc:HGNC:17097]
ENSG00000130725.7	UBE2M	protein_coding	3824.16	-0.732005	9.38268e-05	0.000939237	154.014	ubiquitin conjugating enzyme E2 M [Source:HGNC Symbol;Acc:HGNC:12491]
ENSG00000130731.15	C16orf13	protein_coding	6080.23	-0.926978	3.23656e-05	0.000399657	277.064	methyltransferase like 26 [Source:HGNC Symbol;Acc:HGNC:14141]
ENSG00000130734.9	ATG4D	protein_coding	2586.49	-0.902243	1.45488e-05	0.000213962	87.1426	autophagy related 4D cysteine peptidase [Source:HGNC Symbol;Acc:HGNC:20789]
ENSG00000130748.6	TMEM160	protein_coding	1021.79	-0.73068	0.000762079	0.00478301	113.702	transmembrane protein 160 [Source:HGNC Symbol;Acc:HGNC:26042]
ENSG00000130749.9	ZC3H4	protein_coding	2385.95	1.14541	2.14869e-05	0.000291579	47.5535	zinc finger CCCH-type containing 4 [Source:HGNC Symbol;Acc:HGNC:17808]
ENSG00000130762.14	ARHGEF16	protein_coding	5226.79	-0.734176	5.60707e-05	0.00062463	70.3057	Rho guanine nucleotide exchange factor 16 [Source:HGNC Symbol;Acc:HGNC:15515]
ENSG00000130764.9	LRRC47	protein_coding	2787.93	-0.693933	0.000219324	0.00181364	44.966	leucine rich repeat containing 47 [Source:HGNC Symbol;Acc:HGNC:29207]
ENSG00000130775.15	THEMIS2	protein_coding	442.471	-0.97748	0.000147104	0.00133402	7.34195	thymocyte selection associated family member 2 [Source:HGNC Symbol;Acc:HGNC:16839]
ENSG00000130813.17	C19orf66	protein_coding	576.759	0.705045	0.00294967	0.0136913	14.3256	chromosome 19 open reading frame 66 [Source:HGNC Symbol;Acc:HGNC:25649]
ENSG00000130822.15	PNCK	protein_coding	147.327	0.830222	0.00574621	0.0228071	3.08232	pregnancy up-regulated nonubiquitous CaM kinase [Source:HGNC Symbol;Acc:HGNC:13415]
ENSG00000130829.17	DUSP9	protein_coding	116.007	-0.787041	0.0156953	0.0493517	3.175	dual specificity phosphatase 9 [Source:HGNC Symbol;Acc:HGNC:3076]
ENSG00000130844.16	ZNF331	protein_coding	2049.98	-0.619907	0.00152446	0.00823492	18.551	zinc finger protein 331 [Source:HGNC Symbol;Acc:HGNC:15489]
ENSG00000130881.13	LRP3	protein_coding	517.374	1.20073	1.97251e-06	4.3126e-05	12.7616	LDL receptor related protein 3 [Source:HGNC Symbol;Acc:HGNC:6695]
ENSG00000131013.3	PPIL4	protein_coding	3448.96	-0.792061	0.000869519	0.00527883	108.535	peptidylprolyl isomerase like 4 [Source:HGNC Symbol;Acc:HGNC:15702]
ENSG00000131051.21	RBM39	protein_coding	18742.1	-0.731334	0.00203639	0.0102602	164.839	RNA binding motif protein 39 [Source:HGNC Symbol;Acc:HGNC:15923]
ENSG00000131069.19	ACSS2	protein_coding	1295.72	-1.37993	1.74017e-09	1.32588e-07	21.7859	acyl-CoA synthetase short chain family member 2 [Source:HGNC Symbol;Acc:HGNC:15814]
ENSG00000131089.13	ARHGEF9	protein_coding	1484.09	1.47322	3.6679e-09	2.57018e-07	25.3501	Cdc42 guanine nucleotide exchange factor 9 [Source:HGNC Symbol;Acc:HGNC:14561]
ENSG00000131094.3	C1QL1	protein_coding	74.9905	-1.02579	0.00636974	0.0245992	4.89828	complement C1q like 1 [Source:HGNC Symbol;Acc:HGNC:24182]
ENSG00000131100.12	ATP6V1E1	protein_coding	4031.1	-0.725954	0.000198016	0.00166827	90.0318	ATPase H+ transporting V1 subunit E1 [Source:HGNC Symbol;Acc:HGNC:857]
ENSG00000131143.8	COX4I1	protein_coding	18164.9	-0.603489	0.00192218	0.00980163	266.221	cytochrome c oxidase subunit 4I1 [Source:HGNC Symbol;Acc:HGNC:2265]
ENSG00000131171.12	SH3BGRL	protein_coding	3086.34	1.02376	1.87436e-07	6.30545e-06	159.739	SH3 domain binding glutamate rich protein like [Source:HGNC Symbol;Acc:HGNC:10823]
ENSG00000131174.4	COX7B	protein_coding	3496.61	-0.933454	4.45254e-05	0.000518611	96.2486	cytochrome c oxidase subunit 7B [Source:HGNC Symbol;Acc:HGNC:2291]
ENSG00000131187.9	F12	protein_coding	881.061	-0.898109	3.14981e-05	0.000392423	24.0897	coagulation factor XII [Source:HGNC Symbol;Acc:HGNC:3530]
ENSG00000131188.11	PRR7	protein_coding	1484.25	-0.675891	0.00231445	0.0113084	62.8901	proline rich 7, synaptic [Source:HGNC Symbol;Acc:HGNC:28130]
ENSG00000131263.12	RLIM	protein_coding	6610.89	-0.800616	8.24427e-05	0.000845159	59.1689	ring finger protein, LIM domain interacting [Source:HGNC Symbol;Acc:HGNC:13429]
ENSG00000131368.7	MRPS25	protein_coding	3537.21	0.669595	0.0002587	0.00206247	67.5607	mitochondrial ribosomal protein S25 [Source:HGNC Symbol;Acc:HGNC:14511]
ENSG00000131378.13	RFTN1	protein_coding	179.3	0.988802	0.00108365	0.00627947	4.28955	raftlin, lipid raft linker 1 [Source:HGNC Symbol;Acc:HGNC:30278]
ENSG00000131389.16	SLC6A6	protein_coding	14376.9	-0.845339	4.21295e-06	7.95389e-05	146.184	solute carrier family 6 member 6 [Source:HGNC Symbol;Acc:HGNC:11052]
ENSG00000131408.13	NR1H2	protein_coding	3677.81	0.627063	0.00631452	0.0244509	95.7227	nuclear receptor subfamily 1 group H member 2 [Source:HGNC Symbol;Acc:HGNC:7965]
ENSG00000131437.15	KIF3A	protein_coding	1011.3	-0.688593	0.000642136	0.00418268	11.6188	kinesin family member 3A [Source:HGNC Symbol;Acc:HGNC:6319]
ENSG00000131462.7	TUBG1	protein_coding	581.102	-0.653592	0.00457865	0.0191334	20.0861	tubulin gamma 1 [Source:HGNC Symbol;Acc:HGNC:12417]
ENSG00000131469.12	RPL27	protein_coding	28614.4	-0.655415	0.000789877	0.0049291	1011.03	ribosomal protein L27 [Source:HGNC Symbol;Acc:HGNC:10328]
ENSG00000131473.16	ACLY	protein_coding	5314.76	-0.678903	0.000137975	0.00126839	79.6288	ATP citrate lyase [Source:HGNC Symbol;Acc:HGNC:115]
ENSG00000131495.8	NDUFA2	protein_coding	2876.53	-0.99306	1.30609e-05	0.000196116	164.011	NADH:ubiquinone oxidoreductase subunit A2 [Source:HGNC Symbol;Acc:HGNC:7685]
ENSG00000131503.20	ANKHD1	protein_coding	487.959	-0.905446	0.000946651	0.00562868	3.79355	ankyrin repeat and KH domain containing 1 [Source:HGNC Symbol;Acc:HGNC:24714]
ENSG00000131626.15	PPFIA1	protein_coding	6818.77	-0.921974	4.08961e-06	7.77292e-05	49.7324	PTPRF interacting protein alpha 1 [Source:HGNC Symbol;Acc:HGNC:9245]
ENSG00000131653.12	TRAF7	protein_coding	6021.46	-0.876181	1.33371e-05	0.000199132	102.827	TNF receptor associated factor 7 [Source:HGNC Symbol;Acc:HGNC:20456]
ENSG00000131746.12	TNS4	protein_coding	66.3864	-1.22955	0.00156196	0.00838812	1.38654	tensin 4 [Source:HGNC Symbol;Acc:HGNC:24352]
ENSG00000131747.14	TOP2A	protein_coding	34522.1	-1.05377	7.05497e-09	4.38061e-07	444.725	DNA topoisomerase II alpha [Source:HGNC Symbol;Acc:HGNC:11989]
ENSG00000131748.15	STARD3	protein_coding	1841.23	-0.675277	0.00200512	0.0101495	26.8379	StAR related lipid transfer domain containing 3 [Source:HGNC Symbol;Acc:HGNC:17579]
ENSG00000131759.17	RARA	protein_coding	4072.92	-1.1688	3.96671e-06	7.56406e-05	82.0421	retinoic acid receptor alpha [Source:HGNC Symbol;Acc:HGNC:9864]
ENSG00000131778.17	CHD1L	protein_coding	6305.48	-1.06857	1.0114e-08	5.8823e-07	149.454	chromodomain helicase DNA binding protein 1 like [Source:HGNC Symbol;Acc:HGNC:1916]
ENSG00000131791.7	PRKAB2	protein_coding	17007.5	-0.983132	4.66279e-06	8.66415e-05	254.22	protein kinase AMP-activated non-catalytic subunit beta 2 [Source:HGNC Symbol;Acc:HGNC:9379]
ENSG00000131797.12	CLUHP3	transcribed_unprocessed_pseudogene	1514.44	0.851829	0.000132524	0.00123519	26.8223	clustered mitochondria homolog pseudogene 3 [Source:HGNC Symbol;Acc:HGNC:28447]
ENSG00000131844.15	MCCC2	protein_coding	16309.5	0.966223	4.49288e-07	1.29573e-05	302.345	methylcrotonoyl-CoA carboxylase 2 [Source:HGNC Symbol;Acc:HGNC:6937]
ENSG00000131848.9	ZSCAN5A	protein_coding	157.941	0.757742	0.0153459	0.0484626	2.07852	zinc finger and SCAN domain containing 5A [Source:HGNC Symbol;Acc:HGNC:23710]
ENSG00000131873.5	CHSY1	protein_coding	4387.14	-0.793876	2.07526e-05	0.000283994	68.438	chondroitin sulfate synthase 1 [Source:HGNC Symbol;Acc:HGNC:17198]
ENSG00000131876.16	SNRPA1	protein_coding	4824.58	-0.780943	0.000525494	0.00358017	105.498	small nuclear ribonucleoprotein polypeptide A' [Source:HGNC Symbol;Acc:HGNC:11152]
ENSG00000131931.8	THAP1	protein_coding	859.289	-0.881724	0.000696536	0.00445008	30.4566	THAP domain containing 1 [Source:HGNC Symbol;Acc:HGNC:20856]
ENSG00000131941.7	RHPN2	protein_coding	5905.28	-1.18062	4.61739e-11	6.10335e-09	104.291	rhophilin Rho GTPase binding protein 2 [Source:HGNC Symbol;Acc:HGNC:19974]
ENSG00000131943.17	C19orf12	protein_coding	525.187	0.798043	0.00186089	0.00956739	17.3789	chromosome 19 open reading frame 12 [Source:HGNC Symbol;Acc:HGNC:25443]
ENSG00000132016.11	C19orf57	protein_coding	42.327	1.29184	0.00265109	0.0126039	1.43784	chromosome 19 open reading frame 57 [Source:HGNC Symbol;Acc:HGNC:28153]
ENSG00000132031.12	MATN3	protein_coding	320.785	-0.716384	0.00386038	0.01684	8.64277	matrilin 3 [Source:HGNC Symbol;Acc:HGNC:6909]
ENSG00000132141.13	CCT6B	protein_coding	51.1259	1.48489	0.000488871	0.00337547	1.47957	chaperonin containing TCP1 subunit 6B [Source:HGNC Symbol;Acc:HGNC:1621]
ENSG00000132155.11	RAF1	protein_coding	9954.61	-0.672564	0.00039088	0.00283336	88.9035	Raf-1 proto-oncogene, serine/threonine kinase [Source:HGNC Symbol;Acc:HGNC:9829]
ENSG00000132182.11	NUP210	protein_coding	8853.2	-0.622597	0.000522526	0.00356273	87.719	nucleoporin 210 [Source:HGNC Symbol;Acc:HGNC:30052]
ENSG00000132196.13	HSD17B7	protein_coding	686.88	-0.976287	6.96423e-05	0.000740474	14.0375	hydroxysteroid 17-beta dehydrogenase 7 [Source:HGNC Symbol;Acc:HGNC:5215]
ENSG00000132199.18	ENOSF1	protein_coding	5060.4	0.80824	9.413e-05	0.000941731	54.1854	enolase superfamily member 1 [Source:HGNC Symbol;Acc:HGNC:30365]
ENSG00000132286.11	TIMM10B	protein_coding	924.355	-0.93833	0.00012717	0.00119486	25.6238	translocase of inner mitochondrial membrane 10B [Source:HGNC Symbol;Acc:HGNC:4022]
ENSG00000132323.8	ILKAP	protein_coding	908.753	-0.665433	0.00463826	0.0193147	14.569	ILK associated serine/threonine phosphatase [Source:HGNC Symbol;Acc:HGNC:15566]
ENSG00000132326.11	PER2	protein_coding	4037.76	-0.679804	0.000284598	0.00221781	43.2674	period circadian regulator 2 [Source:HGNC Symbol;Acc:HGNC:8846]
ENSG00000132334.16	PTPRE	protein_coding	1182.45	-0.790411	7.89639e-05	0.000814898	9.05482	protein tyrosine phosphatase, receptor type E [Source:HGNC Symbol;Acc:HGNC:9669]
ENSG00000132376.19	INPP5K	protein_coding	1594.13	0.640169	0.00083153	0.00512571	29.7007	inositol polyphosphate-5-phosphatase K [Source:HGNC Symbol;Acc:HGNC:33882]
ENSG00000132432.13	SEC61G	protein_coding	6528.95	-1.03124	1.36877e-05	0.000202513	315.369	Sec61 translocon gamma subunit [Source:HGNC Symbol;Acc:HGNC:18277]
ENSG00000132434.9	LANCL2	protein_coding	483.701	1.13003	7.7784e-05	0.000807362	12.0734	LanC like 2 [Source:HGNC Symbol;Acc:HGNC:6509]
ENSG00000132436.11	FIGNL1	protein_coding	2063.94	-0.877978	0.00019553	0.00164892	34.9754	fidgetin like 1 [Source:HGNC Symbol;Acc:HGNC:13286]
ENSG00000132475.8	H3F3B	protein_coding	71575.4	-0.921349	4.4693e-05	0.000519177	986.852	H3 histone family member 3B [Source:HGNC Symbol;Acc:HGNC:4765]
ENSG00000132541.10	HRSP12	protein_coding	1724.56	0.738802	0.000187093	0.00160412	111.731	reactive intermediate imine deaminase A homolog [Source:HGNC Symbol;Acc:HGNC:16897]
ENSG00000132581.9	SDF2	protein_coding	2357.99	-0.884392	4.64011e-05	0.000533911	56.5111	stromal cell derived factor 2 [Source:HGNC Symbol;Acc:HGNC:10675]
ENSG00000132589.15	FLOT2	protein_coding	2661.93	0.728454	0.000498736	0.00343272	81.991	flotillin 2 [Source:HGNC Symbol;Acc:HGNC:3758]
ENSG00000132623.15	ANKEF1	protein_coding	994.796	0.656769	0.00445246	0.0187649	17.9779	ankyrin repeat and EF-hand domain containing 1 [Source:HGNC Symbol;Acc:HGNC:15803]
ENSG00000132640.14	BTBD3	protein_coding	4380.58	-0.684102	0.000214859	0.00178773	52.5262	BTB domain containing 3 [Source:HGNC Symbol;Acc:HGNC:15854]
ENSG00000132661.3	NXT1	protein_coding	1133.9	-1.23868	1.93218e-05	0.000268376	104.408	nuclear transport factor 2 like export factor 1 [Source:HGNC Symbol;Acc:HGNC:15913]
ENSG00000132669.12	RIN2	protein_coding	1250.14	1.3206	1.19102e-08	6.74707e-07	28.8553	Ras and Rab interactor 2 [Source:HGNC Symbol;Acc:HGNC:18750]
ENSG00000132688.10	NES	protein_coding	302.424	1.3869	6.09899e-08	2.50389e-06	7.08448	nestin [Source:HGNC Symbol;Acc:HGNC:7756]
ENSG00000132746.14	ALDH3B2	protein_coding	612.836	-0.660262	0.00456159	0.019089	18.1842	aldehyde dehydrogenase 3 family member B2 [Source:HGNC Symbol;Acc:HGNC:411]
ENSG00000132763.14	MMACHC	protein_coding	296.589	0.910332	0.00594083	0.0233406	6.5296	metabolism of cobalamin associated C [Source:HGNC Symbol;Acc:HGNC:24525]
ENSG00000132768.13	DPH2	protein_coding	511.436	0.626589	0.00519527	0.0210758	18.3481	DPH2 homolog [Source:HGNC Symbol;Acc:HGNC:3004]
ENSG00000132801.6	ZSWIM3	protein_coding	133.659	1.23173	0.00209514	0.0104867	6.99502	zinc finger SWIM-type containing 3 [Source:HGNC Symbol;Acc:HGNC:16157]
ENSG00000132823.10	OSER1	protein_coding	5667.09	-0.611638	0.00842248	0.030603	257.257	oxidative stress responsive serine rich 1 [Source:HGNC Symbol;Acc:HGNC:16105]
ENSG00000132824.13	SERINC3	protein_coding	12847.9	-0.923677	1.26693e-06	3.03646e-05	207.2	serine incorporator 3 [Source:HGNC Symbol;Acc:HGNC:11699]
ENSG00000132846.5	ZBED3	protein_coding	162.432	1.06145	0.00202716	0.0102373	3.20082	zinc finger BED-type containing 3 [Source:HGNC Symbol;Acc:HGNC:20711]
ENSG00000132970.12	WASF3	protein_coding	844.502	-0.930213	1.45978e-05	0.000214049	13.0098	WAS protein family member 3 [Source:HGNC Symbol;Acc:HGNC:12734]
ENSG00000133027.17	PEMT	protein_coding	1356.06	-0.768342	0.000122199	0.00115562	59.2608	phosphatidylethanolamine N-methyltransferase [Source:HGNC Symbol;Acc:HGNC:8830]
ENSG00000133030.19	MPRIP	protein_coding	7235.57	-0.636946	0.000328433	0.00247679	29.9434	myosin phosphatase Rho interacting protein [Source:HGNC Symbol;Acc:HGNC:30321]
ENSG00000133083.14	DCLK1	protein_coding	1622.24	0.930524	0.000239804	0.00194609	13.011	doublecortin like kinase 1 [Source:HGNC Symbol;Acc:HGNC:2700]
ENSG00000133104.12	SPG20	protein_coding	965.356	0.952547	1.41352e-05	0.000208303	17.8525	spartin [Source:HGNC Symbol;Acc:HGNC:18514]
ENSG00000133111.3	RFXAP	protein_coding	134.439	1.07945	0.0019062	0.00973918	7.05694	regulatory factor X associated protein [Source:HGNC Symbol;Acc:HGNC:9988]
ENSG00000133112.16	TPT1	protein_coding	233400	-0.611386	0.00209023	0.0104709	2300.43	tumor protein, translationally-controlled 1 [Source:HGNC Symbol;Acc:HGNC:12022]
ENSG00000133138.19	TBC1D8B	protein_coding	254.335	0.954731	0.000636074	0.00415352	3.13437	TBC1 domain family member 8B [Source:HGNC Symbol;Acc:HGNC:24715]
ENSG00000133195.11	SLC39A11	protein_coding	1075.01	0.965229	1.67975e-05	0.000240429	21.7048	solute carrier family 39 member 11 [Source:HGNC Symbol;Acc:HGNC:14463]
ENSG00000133216.16	EPHB2	protein_coding	130.562	0.882602	0.0100656	0.0350058	1.35182	EPH receptor B2 [Source:HGNC Symbol;Acc:HGNC:3393]
ENSG00000133226.16	SRRM1	protein_coding	9927.02	-1.17957	5.83331e-07	1.61555e-05	110.735	serine and arginine repetitive matrix 1 [Source:HGNC Symbol;Acc:HGNC:16638]
ENSG00000133250.13	ZNF414	protein_coding	470.268	-0.765923	0.00180309	0.00938714	13.0734	zinc finger protein 414 [Source:HGNC Symbol;Acc:HGNC:20630]
ENSG00000133256.12	PDE6B	protein_coding	149.433	0.834292	0.00977638	0.034232	3.28533	phosphodiesterase 6B [Source:HGNC Symbol;Acc:HGNC:8786]
ENSG00000133302.12	SLF1	protein_coding	861.735	-0.612632	0.00591211	0.0232802	8.64263	SMC5-SMC6 complex localization factor 1 [Source:HGNC Symbol;Acc:HGNC:25408]
ENSG00000133466.13	C1QTNF6	protein_coding	696.698	0.854912	0.000194699	0.00164668	11.1165	C1q and TNF related 6 [Source:HGNC Symbol;Acc:HGNC:14343]
ENSG00000133477.16	FAM83F	protein_coding	1705.98	-0.839987	0.000112068	0.00108211	7.6594	family with sequence similarity 83 member F [Source:HGNC Symbol;Acc:HGNC:25148]
ENSG00000133639.4	BTG1	protein_coding	14145.5	-0.713905	0.000937261	0.00558706	226.533	BTG anti-proliferation factor 1 [Source:HGNC Symbol;Acc:HGNC:1130]
ENSG00000133703.11	KRAS	protein_coding	4069.73	-0.59034	0.0017594	0.00921031	38.6918	KRAS proto-oncogene, GTPase [Source:HGNC Symbol;Acc:HGNC:6407]
ENSG00000133805.15	AMPD3	protein_coding	1019.08	2.11603	4.36556e-15	2.1763e-12	23.9947	adenosine monophosphate deaminase 3 [Source:HGNC Symbol;Acc:HGNC:470]
ENSG00000133874.1	RNF122	protein_coding	778.626	-0.623076	0.00987822	0.0344781	31.8486	ring finger protein 122 [Source:HGNC Symbol;Acc:HGNC:21147]
ENSG00000133935.6	C14orf1	protein_coding	3904.81	-0.773017	0.000123381	0.00116618	110.643	ergosterol biosynthesis 28 homolog [Source:HGNC Symbol;Acc:HGNC:1187]
ENSG00000133997.11	MED6	protein_coding	2546.38	-0.959176	6.14761e-05	0.00066956	57.544	mediator complex subunit 6 [Source:HGNC Symbol;Acc:HGNC:19970]
ENSG00000134013.15	LOXL2	protein_coding	13488.6	-1.03152	4.76409e-08	2.05752e-06	183.59	lysyl oxidase like 2 [Source:HGNC Symbol;Acc:HGNC:6666]
ENSG00000134057.14	CCNB1	protein_coding	10113.1	-0.816125	1.48038e-05	0.000216148	298.324	cyclin B1 [Source:HGNC Symbol;Acc:HGNC:1579]
ENSG00000134107.4	BHLHE40	protein_coding	40396.5	-1.09178	4.44897e-07	1.28732e-05	856.315	basic helix-loop-helix family member e40 [Source:HGNC Symbol;Acc:HGNC:1046]
ENSG00000134108.12	ARL8B	protein_coding	9119.08	-0.827156	1.95287e-05	0.000270212	189.406	ADP ribosylation factor like GTPase 8B [Source:HGNC Symbol;Acc:HGNC:25564]
ENSG00000134152.10	KATNBL1	protein_coding	1596.96	-0.891096	2.03614e-05	0.000279078	16.7134	katanin regulatory subunit B1 like 1 [Source:HGNC Symbol;Acc:HGNC:26199]
ENSG00000134153.9	EMC7	protein_coding	1660.51	-0.646958	0.00263699	0.012556	79.4917	ER membrane protein complex subunit 7 [Source:HGNC Symbol;Acc:HGNC:24301]
ENSG00000134186.11	PRPF38B	protein_coding	4756.54	-0.814387	0.000273895	0.00214658	65.8071	pre-mRNA processing factor 38B [Source:HGNC Symbol;Acc:HGNC:25512]
ENSG00000134215.15	VAV3	protein_coding	2018.33	0.895128	2.12725e-05	0.000289519	29.3852	vav guanine nucleotide exchange factor 3 [Source:HGNC Symbol;Acc:HGNC:12659]
ENSG00000134222.16	PSRC1	protein_coding	7895.88	-1.13023	8.03005e-08	3.16987e-06	230.834	proline and serine rich coiled-coil 1 [Source:HGNC Symbol;Acc:HGNC:24472]
ENSG00000134248.13	LAMTOR5	protein_coding	6692.35	-1.29779	3.2641e-08	1.49089e-06	260.207	late endosomal/lysosomal adaptor, MAPK and MTOR activator 5 [Source:HGNC Symbol;Acc:HGNC:17955]
ENSG00000134253.9	TRIM45	protein_coding	489.895	1.40023	2.7518e-07	8.65106e-06	15.7339	tripartite motif containing 45 [Source:HGNC Symbol;Acc:HGNC:19018]
ENSG00000134255.13	CEPT1	protein_coding	2778.2	-0.811433	0.000160263	0.00142377	25.7863	choline/ethanolamine phosphotransferase 1 [Source:HGNC Symbol;Acc:HGNC:24289]
ENSG00000134258.16	VTCN1	protein_coding	1305.26	1.04665	7.36548e-05	0.000773708	52.7253	V-set domain containing T cell activation inhibitor 1 [Source:HGNC Symbol;Acc:HGNC:28873]
ENSG00000134287.9	ARF3	protein_coding	8476.96	-1.06882	2.63081e-08	1.26228e-06	132.955	ADP ribosylation factor 3 [Source:HGNC Symbol;Acc:HGNC:654]
ENSG00000134291.11	TMEM106C	protein_coding	4106.34	-0.587979	0.004126	0.0177186	84.9292	transmembrane protein 106C [Source:HGNC Symbol;Acc:HGNC:28775]
ENSG00000134323.10	MYCN	protein_coding	183.893	-0.944578	0.00162962	0.00865561	5.64553	MYCN proto-oncogene, bHLH transcription factor [Source:HGNC Symbol;Acc:HGNC:7559]
ENSG00000134369.15	NAV1	protein_coding	1733.89	-1.1247	2.85964e-07	8.95779e-06	6.09097	neuron navigator 1 [Source:HGNC Symbol;Acc:HGNC:15989]
ENSG00000134371.9	CDC73	protein_coding	5230.96	-0.691809	0.000172562	0.00151148	73.1883	cell division cycle 73 [Source:HGNC Symbol;Acc:HGNC:16783]
ENSG00000134375.10	TIMM17A	protein_coding	997.983	-0.806028	0.000636354	0.0041538	22.8273	translocase of inner mitochondrial membrane 17A [Source:HGNC Symbol;Acc:HGNC:17315]
ENSG00000134419.15	RPS15A	protein_coding	11744.7	-0.73664	0.000339129	0.00253953	132.423	ribosomal protein S15a [Source:HGNC Symbol;Acc:HGNC:10389]
ENSG00000134453.15	RBM17	protein_coding	6445.24	-0.72613	0.000403405	0.00290852	92.9242	RNA binding motif protein 17 [Source:HGNC Symbol;Acc:HGNC:16944]
ENSG00000134480.13	CCNH	protein_coding	1679.52	-0.941488	2.00194e-05	0.000275472	29.173	cyclin H [Source:HGNC Symbol;Acc:HGNC:1594]
ENSG00000134533.6	RERG	protein_coding	579.85	0.646979	0.00277217	0.013072	14.1732	RAS like estrogen regulated growth inhibitor [Source:HGNC Symbol;Acc:HGNC:15980]
ENSG00000134602.15	STK26	protein_coding	5255.28	-0.71109	0.000169197	0.00148349	115.196	serine/threonine kinase 26 [Source:HGNC Symbol;Acc:HGNC:18174]
ENSG00000134668.12	SPOCD1	protein_coding	788.975	-1.12583	5.13397e-08	2.16633e-06	9.44843	SPOC domain containing 1 [Source:HGNC Symbol;Acc:HGNC:26338]
ENSG00000134690.10	CDCA8	protein_coding	3303.37	-1.03764	1.04304e-07	3.89698e-06	102.608	cell division cycle associated 8 [Source:HGNC Symbol;Acc:HGNC:14629]
ENSG00000134697.12	GNL2	protein_coding	3798.54	-0.598953	0.00357811	0.0158655	46.6876	G protein nucleolar 2 [Source:HGNC Symbol;Acc:HGNC:29925]
ENSG00000134716.9	CYP2J2	protein_coding	198.695	1.17995	3.30142e-05	0.000405371	7.8237	cytochrome P450 family 2 subfamily J member 2 [Source:HGNC Symbol;Acc:HGNC:2634]
ENSG00000134748.12	PRPF38A	protein_coding	3152.67	-0.642173	0.00456219	0.019089	43.0154	pre-mRNA processing factor 38A [Source:HGNC Symbol;Acc:HGNC:25930]
ENSG00000134755.14	DSC2	protein_coding	619.725	0.748867	0.00100297	0.00589817	4.97988	desmocollin 2 [Source:HGNC Symbol;Acc:HGNC:3036]
ENSG00000134758.13	RNF138	protein_coding	1506.3	-0.628052	0.00252572	0.0121201	28.1513	ring finger protein 138 [Source:HGNC Symbol;Acc:HGNC:17765]
ENSG00000134780.9	DAGLA	protein_coding	173.025	0.814555	0.0142202	0.0457354	3.73528	diacylglycerol lipase alpha [Source:HGNC Symbol;Acc:HGNC:1165]
ENSG00000134825.13	TMEM258	protein_coding	6438.68	-0.771523	0.000353503	0.00261353	162.575	transmembrane protein 258 [Source:HGNC Symbol;Acc:HGNC:1164]
ENSG00000134830.5	C5AR2	protein_coding	66.15	1.52408	0.000139525	0.00127926	1.27098	complement component 5a receptor 2 [Source:HGNC Symbol;Acc:HGNC:4527]
ENSG00000134851.12	TMEM165	protein_coding	7821.66	-1.31254	9.36307e-10	7.89212e-08	97.4131	transmembrane protein 165 [Source:HGNC Symbol;Acc:HGNC:30760]
ENSG00000134897.13	BIVM	protein_coding	394.271	0.618944	0.00880424	0.0315564	7.09386	basic, immunoglobulin-like variable motif containing [Source:HGNC Symbol;Acc:HGNC:16034]
ENSG00000134910.12	STT3A	protein_coding	7665.63	-0.919745	5.66355e-06	0.000100423	81.48	STT3A, catalytic subunit of the oligosaccharyltransferase complex [Source:HGNC Symbol;Acc:HGNC:6172]
ENSG00000134970.13	TMED7	protein_coding	5269.5	-0.623772	0.00103201	0.00604446	95.8539	transmembrane p24 trafficking protein 7 [Source:HGNC Symbol;Acc:HGNC:24253]
ENSG00000134996.11	OSTF1	protein_coding	2154.45	-0.822778	7.9389e-05	0.000815771	124.43	osteoclast stimulating factor 1 [Source:HGNC Symbol;Acc:HGNC:8510]
ENSG00000135002.11	RFK	protein_coding	768.922	-1.08984	5.75416e-07	1.5987e-05	15.5863	riboflavin kinase [Source:HGNC Symbol;Acc:HGNC:30324]
ENSG00000135018.13	UBQLN1	protein_coding	15311.4	-0.902086	4.36235e-06	8.18433e-05	162.251	ubiquilin 1 [Source:HGNC Symbol;Acc:HGNC:12508]
ENSG00000135046.13	ANXA1	protein_coding	2234.88	1.00212	1.80716e-07	6.11071e-06	56.6408	annexin A1 [Source:HGNC Symbol;Acc:HGNC:533]
ENSG00000135063.17	FAM189A2	protein_coding	430.306	1.36352	9.93796e-09	5.81871e-07	13.7548	family with sequence similarity 189 member A2 [Source:HGNC Symbol;Acc:HGNC:24820]
ENSG00000135083.14	CCNJL	protein_coding	642.599	0.615132	0.00734343	0.0274071	13.9396	cyclin J like [Source:HGNC Symbol;Acc:HGNC:25876]
ENSG00000135108.14	FBXO21	protein_coding	8064.76	-0.838061	3.0275e-06	6.02325e-05	90.123	F-box protein 21 [Source:HGNC Symbol;Acc:HGNC:13592]
ENSG00000135111.14	TBX3	protein_coding	1108.37	-0.621635	0.00215615	0.0107181	13.244	T-box 3 [Source:HGNC Symbol;Acc:HGNC:11602]
ENSG00000135127.11	CCDC64	protein_coding	589.729	0.664858	0.00877884	0.0314847	12.7572	BICD family like cargo adaptor 1 [Source:HGNC Symbol;Acc:HGNC:28095]
ENSG00000135148.11	TRAFD1	protein_coding	7667.4	-0.87248	1.82659e-05	0.000256605	169.561	TRAF-type zinc finger domain containing 1 [Source:HGNC Symbol;Acc:HGNC:24808]
ENSG00000135205.14	CCDC146	protein_coding	294.348	1.51897	3.41131e-07	1.02799e-05	9.03014	coiled-coil domain containing 146 [Source:HGNC Symbol;Acc:HGNC:29296]
ENSG00000135211.5	TMEM60	protein_coding	1431.93	-0.661087	0.00116585	0.00667232	97.9703	transmembrane protein 60 [Source:HGNC Symbol;Acc:HGNC:21754]
ENSG00000135241.16	PNPLA8	protein_coding	2929.95	-0.726483	0.000227526	0.00186642	37.1436	patatin like phospholipase domain containing 8 [Source:HGNC Symbol;Acc:HGNC:28900]
ENSG00000135245.9	HILPDA	protein_coding	74206.4	-1.83657	8.62815e-11	1.05275e-08	4124.01	hypoxia inducible lipid droplet associated [Source:HGNC Symbol;Acc:HGNC:28859]
ENSG00000135249.7	RINT1	protein_coding	3588.96	-0.620037	0.00952068	0.033561	78.0246	RAD50 interactor 1 [Source:HGNC Symbol;Acc:HGNC:21876]
ENSG00000135297.15	MTO1	protein_coding	1926.47	-0.628395	0.0025951	0.0123985	11.5001	mitochondrial tRNA translation optimization 1 [Source:HGNC Symbol;Acc:HGNC:19261]
ENSG00000135299.16	ANKRD6	protein_coding	65.7726	1.63608	2.77366e-05	0.000356356	1.00015	ankyrin repeat domain 6 [Source:HGNC Symbol;Acc:HGNC:17280]
ENSG00000135315.11	CEP162	protein_coding	374.261	1.10669	2.36286e-05	0.000314712	8.86319	centrosomal protein 162 [Source:HGNC Symbol;Acc:HGNC:21107]
ENSG00000135333.13	EPHA7	protein_coding	1052.83	0.892618	8.68567e-05	0.000883145	16.915	EPH receptor A7 [Source:HGNC Symbol;Acc:HGNC:3390]
ENSG00000135372.8	NAT10	protein_coding	5215.12	-0.795505	3.05306e-05	0.000382411	72.1084	N-acetyltransferase 10 [Source:HGNC Symbol;Acc:HGNC:29830]
ENSG00000135407.10	AVIL	protein_coding	285.927	1.59907	0.000737615	0.00466132	8.70945	advillin [Source:HGNC Symbol;Acc:HGNC:14188]
ENSG00000135439.11	AGAP2	protein_coding	93.4844	1.47934	4.47358e-05	0.000519328	1.83565	ArfGAP with GTPase domain, ankyrin repeat and PH domain 2 [Source:HGNC Symbol;Acc:HGNC:16921]
ENSG00000135441.7	BLOC1S1	protein_coding	690.286	-0.672326	0.00308537	0.0141556	30.3616	biogenesis of lysosomal organelles complex 1 subunit 1 [Source:HGNC Symbol;Acc:HGNC:4200]
ENSG00000135451.12	TROAP	protein_coding	4453.31	-0.586495	0.00125957	0.00706668	83.0681	trophinin associated protein [Source:HGNC Symbol;Acc:HGNC:12327]
ENSG00000135454.13	B4GALNT1	protein_coding	177.411	0.790621	0.00689302	0.0260888	2.59621	beta-1,4-N-acetyl-galactosaminyltransferase 1 [Source:HGNC Symbol;Acc:HGNC:4117]
ENSG00000135476.11	ESPL1	protein_coding	4392.86	-0.609686	0.00308516	0.0141556	43.9747	extra spindle pole bodies like 1, separase [Source:HGNC Symbol;Acc:HGNC:16856]
ENSG00000135480.14	KRT7	protein_coding	2658.89	-0.769147	2.87289e-05	0.000365885	50.2731	keratin 7 [Source:HGNC Symbol;Acc:HGNC:6445]
ENSG00000135482.6	ZC3H10	protein_coding	389.062	0.705989	0.0153755	0.0485296	5.25295	zinc finger CCCH-type containing 10 [Source:HGNC Symbol;Acc:HGNC:25893]
ENSG00000135537.16	LACE1	protein_coding	321.594	0.822686	0.00080168	0.00498389	4.16118	AFG1 like ATPase [Source:HGNC Symbol;Acc:HGNC:16411]
ENSG00000135547.8	HEY2	protein_coding	747.892	-0.802154	0.000222369	0.00183273	24.11	hes related family bHLH transcription factor with YRPW motif 2 [Source:HGNC Symbol;Acc:HGNC:4881]
ENSG00000135549.14	PKIB	protein_coding	762.769	-0.646566	0.00264956	0.0126035	15.6527	cAMP-dependent protein kinase inhibitor beta [Source:HGNC Symbol;Acc:HGNC:9018]
ENSG00000135605.12	TEC	protein_coding	598.958	-0.806517	0.00199177	0.0101073	12.3104	tec protein tyrosine kinase [Source:HGNC Symbol;Acc:HGNC:11719]
ENSG00000135617.3	PRADC1	protein_coding	420.108	-1.10176	6.66863e-06	0.000114297	23.6808	protease associated domain containing 1 [Source:HGNC Symbol;Acc:HGNC:16047]
ENSG00000135631.15	RAB11FIP5	protein_coding	3672.92	-1.36382	4.04308e-09	2.78517e-07	55.2	RAB11 family interacting protein 5 [Source:HGNC Symbol;Acc:HGNC:24845]
ENSG00000135637.13	CCDC142	protein_coding	336.858	1.0187	0.000285172	0.0022203	7.87756	coiled-coil domain containing 142 [Source:HGNC Symbol;Acc:HGNC:25889]
ENSG00000135723.13	FHOD1	protein_coding	1502.07	-0.783438	0.000815054	0.00504651	22.4506	formin homology 2 domain containing 1 [Source:HGNC Symbol;Acc:HGNC:17905]
ENSG00000135736.5	CCDC102A	protein_coding	224.326	1.52577	2.39655e-08	1.16476e-06	11.2828	coiled-coil domain containing 102A [Source:HGNC Symbol;Acc:HGNC:28097]
ENSG00000135749.18	PCNXL2	protein_coding	252.581	0.960785	0.000252448	0.00202882	2.08244	pecanex 2 [Source:HGNC Symbol;Acc:HGNC:8736]
ENSG00000135750.14	KCNK1	protein_coding	1691.28	-0.701178	0.000659897	0.00427549	33.6157	potassium two pore domain channel subfamily K member 1 [Source:HGNC Symbol;Acc:HGNC:6272]
ENSG00000135773.12	CAPN9	protein_coding	935.559	0.811847	0.000975263	0.00576827	39.3922	calpain 9 [Source:HGNC Symbol;Acc:HGNC:1486]
ENSG00000135775.13	COG2	protein_coding	1506.15	-0.603749	0.00214906	0.0106874	11.0355	component of oligomeric golgi complex 2 [Source:HGNC Symbol;Acc:HGNC:6546]
ENSG00000135823.13	STX6	protein_coding	9687.53	-1.03107	7.67847e-07	2.0026e-05	126.389	syntaxin 6 [Source:HGNC Symbol;Acc:HGNC:11441]
ENSG00000135837.15	CEP350	protein_coding	12536.7	-0.58716	0.00120135	0.00682332	66.0399	centrosomal protein 350 [Source:HGNC Symbol;Acc:HGNC:24238]
ENSG00000135870.11	RC3H1	protein_coding	4404.3	-0.748822	0.000782231	0.00488488	30.3917	ring finger and CCCH-type domains 1 [Source:HGNC Symbol;Acc:HGNC:29434]
ENSG00000135899.16	SP110	protein_coding	1135.51	1.5436	5.01591e-12	9.83344e-10	19.6411	SP110 nuclear body protein [Source:HGNC Symbol;Acc:HGNC:5401]
ENSG00000135900.3	MRPL44	protein_coding	1980.4	-0.825234	0.000376967	0.00275779	92.288	mitochondrial ribosomal protein L44 [Source:HGNC Symbol;Acc:HGNC:16650]
ENSG00000135905.18	DOCK10	protein_coding	520.148	0.842362	0.000847179	0.00518251	5.41664	dedicator of cytokinesis 10 [Source:HGNC Symbol;Acc:HGNC:23479]
ENSG00000135912.10	TTLL4	protein_coding	1898.47	-0.724803	0.000293776	0.00227409	17.5622	tubulin tyrosine ligase like 4 [Source:HGNC Symbol;Acc:HGNC:28976]
ENSG00000135913.10	USP37	protein_coding	4145.98	-0.597516	0.00148384	0.00808304	32.1922	ubiquitin specific peptidase 37 [Source:HGNC Symbol;Acc:HGNC:20063]
ENSG00000135924.15	DNAJB2	protein_coding	5773.46	-0.79011	1.76731e-05	0.000249755	72.7722	DnaJ heat shock protein family (Hsp40) member B2 [Source:HGNC Symbol;Acc:HGNC:5228]
ENSG00000135940.6	COX5B	protein_coding	9301.27	-0.741283	0.000248772	0.00200469	481.995	cytochrome c oxidase subunit 5B [Source:HGNC Symbol;Acc:HGNC:2269]
ENSG00000135945.9	REV1	protein_coding	3272.57	-0.628465	0.00497748	0.0203506	32.307	REV1, DNA directed polymerase [Source:HGNC Symbol;Acc:HGNC:14060]
ENSG00000135951.14	TSGA10	protein_coding	419.294	0.992599	4.35928e-05	0.000512194	6.30442	testis specific 10 [Source:HGNC Symbol;Acc:HGNC:14927]
ENSG00000136002.16	ARHGEF4	protein_coding	221.816	-1.47154	9.40104e-08	3.58143e-06	1.89573	Rho guanine nucleotide exchange factor 4 [Source:HGNC Symbol;Acc:HGNC:684]
ENSG00000136003.15	ISCU	protein_coding	2952.45	-0.649436	0.00283588	0.0133025	49.6535	iron-sulfur cluster assembly enzyme [Source:HGNC Symbol;Acc:HGNC:29882]
ENSG00000136052.9	SLC41A2	protein_coding	295.964	0.659119	0.013972	0.0451202	6.47364	solute carrier family 41 member 2 [Source:HGNC Symbol;Acc:HGNC:31045]
ENSG00000136122.15	BORA	protein_coding	1125.27	-1.00528	7.80142e-06	0.00012972	31.3161	bora, aurora kinase A activator [Source:HGNC Symbol;Acc:HGNC:24724]
ENSG00000136167.13	LCP1	protein_coding	654.193	-0.75264	0.00116661	0.00667232	10.2643	lymphocyte cytosolic protein 1 [Source:HGNC Symbol;Acc:HGNC:6528]
ENSG00000136235.15	GPNMB	protein_coding	368.23	1.1909	6.49545e-07	1.75709e-05	6.94041	glycoprotein nmb [Source:HGNC Symbol;Acc:HGNC:4462]
ENSG00000136261.14	BZW2	protein_coding	5262.98	-0.615695	0.00104924	0.00611872	101.855	basic leucine zipper and W2 domains 2 [Source:HGNC Symbol;Acc:HGNC:18808]
ENSG00000136270.13	TBRG4	protein_coding	3864.61	-0.8307	1.97238e-05	0.000272263	48.8329	transforming growth factor beta regulator 4 [Source:HGNC Symbol;Acc:HGNC:17443]
ENSG00000136280.15	CCM2	protein_coding	1011.21	0.888881	0.000139088	0.00127674	13.5917	CCM2 scaffold protein [Source:HGNC Symbol;Acc:HGNC:21708]
ENSG00000136367.13	ZFHX2	protein_coding	72.3048	1.81357	3.84211e-05	0.000459158	1.04397	zinc finger homeobox 2 [Source:HGNC Symbol;Acc:HGNC:20152]
ENSG00000136379.11	ABHD17C	protein_coding	1626.82	-1.09081	7.88816e-08	3.13133e-06	34.9781	abhydrolase domain containing 17C [Source:HGNC Symbol;Acc:HGNC:26925]
ENSG00000136383.6	ALPK3	protein_coding	327.22	1.82749	6.51384e-08	2.64424e-06	4.2965	alpha kinase 3 [Source:HGNC Symbol;Acc:HGNC:17574]
ENSG00000136444.9	RSAD1	protein_coding	3917.84	-0.774139	0.000339102	0.00253953	71.6542	radical S-adenosyl methionine domain containing 1 [Source:HGNC Symbol;Acc:HGNC:25634]
ENSG00000136490.8	LIMD2	protein_coding	115.861	1.68948	2.96182e-06	5.90604e-05	3.50612	LIM domain containing 2 [Source:HGNC Symbol;Acc:HGNC:28142]
ENSG00000136527.17	TRA2B	protein_coding	7636.99	-0.666849	0.00420024	0.017927	51.9464	transformer 2 beta homolog [Source:HGNC Symbol;Acc:HGNC:10781]
ENSG00000136643.11	RPS6KC1	protein_coding	703.949	0.676336	0.0021837	0.0108058	11.7502	ribosomal protein S6 kinase C1 [Source:HGNC Symbol;Acc:HGNC:10439]
ENSG00000136682.14	CBWD2	protein_coding	1024.13	-0.893857	1.58682e-05	0.000229575	9.20749	COBW domain containing 2 [Source:HGNC Symbol;Acc:HGNC:17907]
ENSG00000136699.19	SMPD4	protein_coding	4756.29	-0.650717	0.00108071	0.00626597	46.1921	sphingomyelin phosphodiesterase 4 [Source:HGNC Symbol;Acc:HGNC:32949]
ENSG00000136709.11	WDR33	protein_coding	4692.98	-0.618633	0.00406762	0.0175382	24.1439	WD repeat domain 33 [Source:HGNC Symbol;Acc:HGNC:25651]
ENSG00000136720.6	HS6ST1	protein_coding	3957.2	-0.849741	1.0118e-05	0.000160199	76.2572	heparan sulfate 6-O-sulfotransferase 1 [Source:HGNC Symbol;Acc:HGNC:5201]
ENSG00000136783.9	NIPSNAP3A	protein_coding	825.936	0.792768	0.00070369	0.00448593	36.3103	nipsnap homolog 3A [Source:HGNC Symbol;Acc:HGNC:23619]
ENSG00000136826.14	KLF4	protein_coding	9938.1	-0.650635	0.0012739	0.00713319	205.37	Kruppel like factor 4 [Source:HGNC Symbol;Acc:HGNC:6348]
ENSG00000136828.18	RALGPS1	protein_coding	1941.88	0.636563	0.00142136	0.00782576	18.7931	Ral GEF with PH domain and SH3 binding motif 1 [Source:HGNC Symbol;Acc:HGNC:16851]
ENSG00000136840.18	ST6GALNAC4	protein_coding	263.512	-0.919366	0.000607684	0.00400259	7.84499	ST6 N-acetylgalactosaminide alpha-2,6-sialyltransferase 4 [Source:HGNC Symbol;Acc:HGNC:17846]
ENSG00000136842.13	TMOD1	protein_coding	143.886	0.974807	0.00184242	0.00950238	4.33745	tropomodulin 1 [Source:HGNC Symbol;Acc:HGNC:11871]
ENSG00000136856.17	SLC2A8	protein_coding	1354.69	-0.61241	0.00661685	0.0253015	25.5582	solute carrier family 2 member 8 [Source:HGNC Symbol;Acc:HGNC:13812]
ENSG00000136867.10	SLC31A2	protein_coding	229.119	1.16797	2.3011e-05	0.000308369	11.141	solute carrier family 31 member 2 [Source:HGNC Symbol;Acc:HGNC:11017]
ENSG00000136868.10	SLC31A1	protein_coding	4646.93	-0.80331	1.72288e-05	0.000245194	67.3401	solute carrier family 31 member 1 [Source:HGNC Symbol;Acc:HGNC:11016]
ENSG00000136870.10	ZNF189	protein_coding	872.461	1.2655	0.00837573	0.0304648	39.4391	zinc finger protein 189 [Source:HGNC Symbol;Acc:HGNC:12980]
ENSG00000136877.14	FPGS	protein_coding	1144.02	0.840338	3.18234e-05	0.000395481	30.3292	folylpolyglutamate synthase [Source:HGNC Symbol;Acc:HGNC:3824]
ENSG00000136883.12	KIF12	protein_coding	124.631	0.962672	0.00236832	0.0115233	4.63974	kinesin family member 12 [Source:HGNC Symbol;Acc:HGNC:21495]
ENSG00000136932.13	TRMO	protein_coding	782.991	0.706098	0.00192235	0.00980163	22.3906	tRNA methyltransferase O [Source:HGNC Symbol;Acc:HGNC:30967]
ENSG00000136942.14	RPL35	protein_coding	72901.3	-0.590842	0.00206814	0.0103901	3299.98	ribosomal protein L35 [Source:HGNC Symbol;Acc:HGNC:10344]
ENSG00000136982.5	DSCC1	protein_coding	366.691	-0.640784	0.010624	0.0364538	10.0298	DNA replication and sister chromatid cohesion 1 [Source:HGNC Symbol;Acc:HGNC:24453]
ENSG00000137040.9	RANBP6	protein_coding	1281.07	-0.599276	0.00217071	0.0107691	22.2837	RAN binding protein 6 [Source:HGNC Symbol;Acc:HGNC:9851]
ENSG00000137075.17	RNF38	protein_coding	3462.52	-1.01378	3.27328e-08	1.49118e-06	46.5556	ring finger protein 38 [Source:HGNC Symbol;Acc:HGNC:18052]
ENSG00000137103.16	TMEM8B	protein_coding	1424.12	-0.595442	0.00552383	0.0221216	18.0809	transmembrane protein 8B [Source:HGNC Symbol;Acc:HGNC:21427]
ENSG00000137166.14	FOXP4	protein_coding	1907.77	1.20574	5.5737e-10	5.0651e-08	34.2094	forkhead box P4 [Source:HGNC Symbol;Acc:HGNC:20842]
ENSG00000137193.13	PIM1	protein_coding	8325.28	-1.66348	1.06355e-13	3.5686e-11	261.164	Pim-1 proto-oncogene, serine/threonine kinase [Source:HGNC Symbol;Acc:HGNC:8986]
ENSG00000137210.13	TMEM14B	protein_coding	4082.63	-0.933867	6.90757e-06	0.000117698	67.3121	transmembrane protein 14B [Source:HGNC Symbol;Acc:HGNC:21384]
ENSG00000137274.12	BPHL	protein_coding	657.952	0.73277	0.00191391	0.00976777	12.0536	biphenyl hydrolase like [Source:HGNC Symbol;Acc:HGNC:1094]
ENSG00000137275.13	RIPK1	protein_coding	939.218	0.856289	0.00670332	0.0255426	26.3349	receptor interacting serine/threonine kinase 1 [Source:HGNC Symbol;Acc:HGNC:10019]
ENSG00000137309.19	HMGA1	protein_coding	3868.91	-0.743754	0.000411402	0.00295518	150.966	high mobility group AT-hook 1 [Source:HGNC Symbol;Acc:HGNC:5010]
ENSG00000137310.11	TCF19	protein_coding	384.856	0.704382	0.0102306	0.0354173	13.0595	transcription factor 19 [Source:HGNC Symbol;Acc:HGNC:11629]
ENSG00000137331.11	IER3	protein_coding	18032.3	-0.853697	0.00018853	0.00161407	1100.54	immediate early response 3 [Source:HGNC Symbol;Acc:HGNC:5392]
ENSG00000137409.18	MTCH1	protein_coding	13816.3	-0.634954	0.00131824	0.00734378	315.807	mitochondrial carrier 1 [Source:HGNC Symbol;Acc:HGNC:17586]
ENSG00000137449.15	CPEB2	protein_coding	3564.62	-0.887114	9.1438e-06	0.000147586	45.5427	cytoplasmic polyadenylation element binding protein 2 [Source:HGNC Symbol;Acc:HGNC:21745]
ENSG00000137462.6	TLR2	protein_coding	313.101	-0.62262	0.0141449	0.0455603	5.26221	toll like receptor 2 [Source:HGNC Symbol;Acc:HGNC:11848]
ENSG00000137486.16	ARRB1	protein_coding	577.721	0.921586	0.000785265	0.00490208	10.82	arrestin beta 1 [Source:HGNC Symbol;Acc:HGNC:711]
ENSG00000137494.13	ANKRD42	protein_coding	1171.01	-0.880499	8.98208e-05	0.000908518	13.7237	ankyrin repeat domain 42 [Source:HGNC Symbol;Acc:HGNC:26752]
ENSG00000137547.8	MRPL15	protein_coding	787.852	1.04947	6.38364e-07	1.73271e-05	75.6985	mitochondrial ribosomal protein L15 [Source:HGNC Symbol;Acc:HGNC:14054]
ENSG00000137563.11	GGH	protein_coding	1716.02	-0.702545	0.000287793	0.0022387	40.2695	gamma-glutamyl hydrolase [Source:HGNC Symbol;Acc:HGNC:4248]
ENSG00000137573.13	SULF1	protein_coding	1283.94	2.4381	4.57065e-20	7.5005e-17	21.9089	sulfatase 1 [Source:HGNC Symbol;Acc:HGNC:20391]
ENSG00000137601.15	NEK1	protein_coding	295.742	1.02872	0.000538334	0.00364912	4.70272	NIMA related kinase 1 [Source:HGNC Symbol;Acc:HGNC:7744]
ENSG00000137656.11	BUD13	protein_coding	1001	-0.638203	0.00452696	0.0189795	32.8687	BUD13 homolog [Source:HGNC Symbol;Acc:HGNC:28199]
ENSG00000137709.9	POU2F3	protein_coding	508.288	0.595938	0.00838802	0.0304968	7.37966	POU class 2 homeobox 3 [Source:HGNC Symbol;Acc:HGNC:19864]
ENSG00000137770.13	CTDSPL2	protein_coding	4035.41	-0.804578	2.65525e-05	0.000344197	30.9772	CTD small phosphatase like 2 [Source:HGNC Symbol;Acc:HGNC:26936]
ENSG00000137804.12	NUSAP1	protein_coding	6907.85	-0.734507	4.44284e-05	0.000517826	180.819	nucleolar and spindle associated protein 1 [Source:HGNC Symbol;Acc:HGNC:18538]
ENSG00000137807.13	KIF23	protein_coding	5780.56	-1.01861	2.15148e-08	1.06645e-06	72.3145	kinesin family member 23 [Source:HGNC Symbol;Acc:HGNC:6392]
ENSG00000137825.10	ITPKA	protein_coding	523.986	-1.13617	1.18828e-06	2.89053e-05	20.2037	inositol-trisphosphate 3-kinase A [Source:HGNC Symbol;Acc:HGNC:6178]
ENSG00000137842.6	TMEM62	protein_coding	266.425	0.713937	0.0087742	0.0314746	5.63367	transmembrane protein 62 [Source:HGNC Symbol;Acc:HGNC:26269]
ENSG00000137878.16	GCOM1	protein_coding	73.1551	-1.57359	5.91819e-05	0.000649461	1.1114	GRINL1A complex locus 1 [Source:HGNC Symbol;Acc:HGNC:26424]
ENSG00000137880.5	GCHFR	protein_coding	520.555	-1.72539	5.8985e-14	2.05834e-11	31.1149	GTP cyclohydrolase I feedback regulator [Source:HGNC Symbol;Acc:HGNC:4194]
ENSG00000137941.16	TTLL7	protein_coding	315.428	0.680368	0.00676653	0.0257063	3.14905	tubulin tyrosine ligase like 7 [Source:HGNC Symbol;Acc:HGNC:26242]
ENSG00000137962.12	ARHGAP29	protein_coding	2275.32	-0.763211	0.000103215	0.00101459	10.5385	Rho GTPase activating protein 29 [Source:HGNC Symbol;Acc:HGNC:30207]
ENSG00000138028.14	CGREF1	protein_coding	935.748	0.766116	0.00019548	0.00164892	23.4188	cell growth regulator with EF-hand domain 1 [Source:HGNC Symbol;Acc:HGNC:16962]
ENSG00000138031.14	ADCY3	protein_coding	458.083	1.07625	4.14318e-05	0.000490768	9.06609	adenylate cyclase 3 [Source:HGNC Symbol;Acc:HGNC:234]
ENSG00000138032.20	PPM1B	protein_coding	2862.87	-0.62792	0.000851827	0.00520584	28.7001	protein phosphatase, Mg2+/Mn2+ dependent 1B [Source:HGNC Symbol;Acc:HGNC:9276]
ENSG00000138071.13	ACTR2	protein_coding	9827.92	-0.593683	0.000714118	0.00453088	185.896	ARP2 actin related protein 2 homolog [Source:HGNC Symbol;Acc:HGNC:169]
ENSG00000138081.19	FBXO11	protein_coding	5927.78	-0.675849	0.00084709	0.00518251	61.5515	F-box protein 11 [Source:HGNC Symbol;Acc:HGNC:13590]
ENSG00000138115.13	CYP2C8	protein_coding	20.6695	1.34879	0.00569087	0.0226337	1.07177	cytochrome P450 family 2 subfamily C member 8 [Source:HGNC Symbol;Acc:HGNC:2622]
ENSG00000138138.13	ATAD1	protein_coding	2393.74	-0.64373	0.00152798	0.00824413	33.3395	ATPase family, AAA domain containing 1 [Source:HGNC Symbol;Acc:HGNC:25903]
ENSG00000138166.5	DUSP5	protein_coding	504.209	-1.15315	2.4128e-06	5.05992e-05	15.2948	dual specificity phosphatase 5 [Source:HGNC Symbol;Acc:HGNC:3071]
ENSG00000138172.10	CALHM2	protein_coding	1222.71	0.751277	0.000185011	0.00159253	39.8539	calcium homeostasis modulator family member 2 [Source:HGNC Symbol;Acc:HGNC:23493]
ENSG00000138182.14	KIF20B	protein_coding	3013.42	-0.617075	0.000760828	0.0047787	33.8335	kinesin family member 20B [Source:HGNC Symbol;Acc:HGNC:7212]
ENSG00000138311.15	ZNF365	protein_coding	177.707	2.40126	1.28436e-13	4.07446e-11	3.26691	zinc finger protein 365 [Source:HGNC Symbol;Acc:HGNC:18194]
ENSG00000138326.18	RPS24	protein_coding	69613.2	-0.662756	0.00118298	0.00674879	1773.04	ribosomal protein S24 [Source:HGNC Symbol;Acc:HGNC:10411]
ENSG00000138376.10	BARD1	protein_coding	1650.43	-0.90162	1.29388e-05	0.000194707	20.7806	BRCA1 associated RING domain 1 [Source:HGNC Symbol;Acc:HGNC:952]
ENSG00000138378.17	STAT4	protein_coding	73.2749	1.78288	4.10133e-06	7.77826e-05	2.68373	signal transducer and activator of transcription 4 [Source:HGNC Symbol;Acc:HGNC:11365]
ENSG00000138380.17	CARF	protein_coding	605.283	1.27672	8.697e-06	0.000141561	8.76562	calcium responsive transcription factor [Source:HGNC Symbol;Acc:HGNC:14435]
ENSG00000138386.16	NAB1	protein_coding	907.164	0.63486	0.00791482	0.0291346	19.5335	NGFI-A binding protein 1 [Source:HGNC Symbol;Acc:HGNC:7626]
ENSG00000138398.15	PPIG	protein_coding	6034.78	-0.623823	0.0023604	0.0114911	59.2405	peptidylprolyl isomerase G [Source:HGNC Symbol;Acc:HGNC:14650]
ENSG00000138439.11	FAM117B	protein_coding	3437.87	-0.605504	0.00409574	0.0176233	51.5348	family with sequence similarity 117 member B [Source:HGNC Symbol;Acc:HGNC:14440]
ENSG00000138495.6	COX17	protein_coding	1370.03	-0.755998	0.000752869	0.00474226	48.8795	cytochrome c oxidase copper chaperone COX17 [Source:HGNC Symbol;Acc:HGNC:2264]
ENSG00000138623.9	SEMA7A	protein_coding	343.87	-1.38775	2.24652e-06	4.7977e-05	7.94933	semaphorin 7A (John Milton Hagen blood group) [Source:HGNC Symbol;Acc:HGNC:10741]
ENSG00000138639.17	ARHGAP24	protein_coding	352.166	0.852657	0.000448147	0.00315983	5.01595	Rho GTPase activating protein 24 [Source:HGNC Symbol;Acc:HGNC:25361]
ENSG00000138641.15	HERC3	protein_coding	8104.31	-0.60154	0.000804292	0.00499583	70.2993	HECT and RLD domain containing E3 ubiquitin protein ligase 3 [Source:HGNC Symbol;Acc:HGNC:4876]
ENSG00000138670.16	RASGEF1B	protein_coding	688.764	-1.18107	0.000140395	0.00128386	7.43954	RasGEF domain family member 1B [Source:HGNC Symbol;Acc:HGNC:24881]
ENSG00000138696.10	BMPR1B	protein_coding	208.432	0.737397	0.0102271	0.0354173	3.33779	bone morphogenetic protein receptor type 1B [Source:HGNC Symbol;Acc:HGNC:1077]
ENSG00000138760.8	SCARB2	protein_coding	13830.6	-0.671378	0.000222974	0.00183339	182.33	scavenger receptor class B member 2 [Source:HGNC Symbol;Acc:HGNC:1665]
ENSG00000138767.12	CNOT6L	protein_coding	3772.22	-0.647527	0.000891619	0.005383	28.3613	CCR4-NOT transcription complex subunit 6 like [Source:HGNC Symbol;Acc:HGNC:18042]
ENSG00000138780.14	GSTCD	protein_coding	854.007	-0.62629	0.00220112	0.0108671	10.5609	glutathione S-transferase C-terminal domain containing [Source:HGNC Symbol;Acc:HGNC:25806]
ENSG00000138785.14	INTS12	protein_coding	1315.74	-0.620765	0.00212888	0.0106037	24.4775	integrator complex subunit 12 [Source:HGNC Symbol;Acc:HGNC:25067]
ENSG00000138792.9	ENPEP	protein_coding	458.134	1.32766	1.38842e-07	4.82571e-06	6.98365	glutamyl aminopeptidase [Source:HGNC Symbol;Acc:HGNC:3355]
ENSG00000138794.9	CASP6	protein_coding	701.956	1.0011	0.000408809	0.00293965	41.0915	caspase 6 [Source:HGNC Symbol;Acc:HGNC:1507]
ENSG00000138802.11	SEC24B	protein_coding	5830.72	-0.673576	0.000587292	0.00389919	78.7145	SEC24 homolog B, COPII coat complex component [Source:HGNC Symbol;Acc:HGNC:10704]
ENSG00000138821.12	SLC39A8	protein_coding	465.585	1.15953	1.67547e-05	0.00024013	8.52052	solute carrier family 39 member 8 [Source:HGNC Symbol;Acc:HGNC:20862]
ENSG00000138834.12	MAPK8IP3	protein_coding	9274.33	-0.823492	0.000131634	0.00122952	71.7832	mitogen-activated protein kinase 8 interacting protein 3 [Source:HGNC Symbol;Acc:HGNC:6884]
ENSG00000139055.6	ERP27	protein_coding	95.9318	1.56619	1.15748e-05	0.000178407	4.91591	endoplasmic reticulum protein 27 [Source:HGNC Symbol;Acc:HGNC:26495]
ENSG00000139112.10	GABARAPL1	protein_coding	898.108	-0.59769	0.00879136	0.0315167	15.9983	GABA type A receptor associated protein like 1 [Source:HGNC Symbol;Acc:HGNC:4068]
ENSG00000139144.9	PIK3C2G	protein_coding	66.9414	1.99942	4.86249e-07	1.38855e-05	1.62895	phosphatidylinositol-4-phosphate 3-kinase catalytic subunit type 2 gamma [Source:HGNC Symbol;Acc:HGNC:8973]
ENSG00000139146.13	FAM60A	protein_coding	3251.52	-0.627554	0.00187599	0.00961585	40.2393	SIN3-HDAC complex associated factor [Source:HGNC Symbol;Acc:HGNC:30702]
ENSG00000139173.9	TMEM117	protein_coding	166.119	0.90815	0.00493702	0.0202304	6.20892	transmembrane protein 117 [Source:HGNC Symbol;Acc:HGNC:25308]
ENSG00000139174.10	PRICKLE1	protein_coding	113.491	1.03435	0.00202073	0.0102078	1.83991	prickle planar cell polarity protein 1 [Source:HGNC Symbol;Acc:HGNC:17019]
ENSG00000139343.10	SNRPF	protein_coding	2756.82	-0.756085	0.00049618	0.00341647	70.304	small nuclear ribonucleoprotein polypeptide F [Source:HGNC Symbol;Acc:HGNC:11162]
ENSG00000139350.11	NEDD1	protein_coding	3000.7	-0.732485	7.91595e-05	0.000815057	52.1287	neural precursor cell expressed, developmentally down-regulated 1 [Source:HGNC Symbol;Acc:HGNC:7723]
ENSG00000139354.10	GAS2L3	protein_coding	3845.55	-0.681444	0.000995096	0.00586243	51.4473	growth arrest specific 2 like 3 [Source:HGNC Symbol;Acc:HGNC:27475]
ENSG00000139370.10	SLC15A4	protein_coding	2488.36	-0.64106	0.000654931	0.00424804	33.8431	solute carrier family 15 member 4 [Source:HGNC Symbol;Acc:HGNC:23090]
ENSG00000139410.14	SDSL	protein_coding	255.994	0.761804	0.00367862	0.0161918	11.7693	serine dehydratase like [Source:HGNC Symbol;Acc:HGNC:30404]
ENSG00000139496.15	NUP58	protein_coding	7767.34	-1.2747	1.86204e-09	1.40416e-07	64.5289	nucleoporin 58 [Source:HGNC Symbol;Acc:HGNC:20261]
ENSG00000139508.14	SLC46A3	protein_coding	199.261	1.49252	7.40187e-06	0.00012466	7.34952	solute carrier family 46 member 3 [Source:HGNC Symbol;Acc:HGNC:27501]
ENSG00000139531.12	SUOX	protein_coding	403.752	0.992875	0.00016399	0.00144803	9.58881	sulfite oxidase [Source:HGNC Symbol;Acc:HGNC:11460]
ENSG00000139620.12	KANSL2	protein_coding	1847.91	-0.617556	0.00932402	0.0330192	42.8709	KAT8 regulatory NSL complex subunit 2 [Source:HGNC Symbol;Acc:HGNC:26024]
ENSG00000139624.12	CERS5	protein_coding	3492.17	-0.617478	0.00276822	0.0130575	40.5875	ceramide synthase 5 [Source:HGNC Symbol;Acc:HGNC:23749]
ENSG00000139626.15	ITGB7	protein_coding	71.8168	1.48297	0.000295744	0.0022873	2.5778	integrin subunit beta 7 [Source:HGNC Symbol;Acc:HGNC:6162]
ENSG00000139644.12	TMBIM6	protein_coding	61271.5	-0.602265	0.000711485	0.00452037	707.879	transmembrane BAX inhibitor motif containing 6 [Source:HGNC Symbol;Acc:HGNC:11723]
ENSG00000139679.15	LPAR6	protein_coding	250.15	0.837559	0.00125611	0.00705166	6.11532	lysophosphatidic acid receptor 6 [Source:HGNC Symbol;Acc:HGNC:15520]
ENSG00000139697.11	SBNO1	protein_coding	11339.6	-0.779192	2.6394e-05	0.000342396	76.0637	strawberry notch homolog 1 [Source:HGNC Symbol;Acc:HGNC:22973]
ENSG00000139719.9	VPS33A	protein_coding	371.757	0.949772	0.000367784	0.00270421	5.66393	VPS33A, CORVET/HOPS core subunit [Source:HGNC Symbol;Acc:HGNC:18179]
ENSG00000139725.7	RHOF	protein_coding	3526.38	-1.14913	9.73644e-09	5.75344e-07	45.6304	ras homolog family member F, filopodia associated [Source:HGNC Symbol;Acc:HGNC:15703]
ENSG00000139793.18	MBNL2	protein_coding	3346.34	-3.18135	4.2874e-67	7.48065e-63	79.0954	muscleblind like splicing regulator 2 [Source:HGNC Symbol;Acc:HGNC:16746]
ENSG00000139826.5	ABHD13	protein_coding	434.313	-0.769846	0.00120919	0.00685441	5.95412	abhydrolase domain containing 13 [Source:HGNC Symbol;Acc:HGNC:20293]
ENSG00000139832.4	RAB20	protein_coding	2137.89	-0.955732	8.13372e-06	0.000133632	112.033	RAB20, member RAS oncogene family [Source:HGNC Symbol;Acc:HGNC:18260]
ENSG00000139899.10	CBLN3	protein_coding	76.2743	1.10069	0.00518318	0.0210327	3.51617	cerebellin 3 precursor [Source:HGNC Symbol;Acc:HGNC:20146]
ENSG00000139977.13	NAA30	protein_coding	3209.78	-0.698085	0.000185228	0.00159288	30.6323	N(alpha)-acetyltransferase 30, NatC catalytic subunit [Source:HGNC Symbol;Acc:HGNC:19844]
ENSG00000140022.9	STON2	protein_coding	165.968	0.717268	0.0135549	0.0440913	2.68827	stonin 2 [Source:HGNC Symbol;Acc:HGNC:30652]
ENSG00000140104.13	C14orf79	protein_coding	775.114	0.820018	0.000100157	0.000991235	16.5041	clathrin binding box of aftiphilin containing 1 [Source:HGNC Symbol;Acc:HGNC:20126]
ENSG00000140105.17	WARS	protein_coding	1515.36	0.685281	0.00159501	0.00851695	26.2349	tryptophanyl-tRNA synthetase [Source:HGNC Symbol;Acc:HGNC:12729]
ENSG00000140153.17	WDR20	protein_coding	2393.83	-0.704117	0.00087256	0.00529361	24.3558	WD repeat domain 20 [Source:HGNC Symbol;Acc:HGNC:19667]
ENSG00000140199.11	SLC12A6	protein_coding	3633.48	-0.888876	5.23234e-06	9.49988e-05	27.5385	solute carrier family 12 member 6 [Source:HGNC Symbol;Acc:HGNC:10914]
ENSG00000140265.12	ZSCAN29	protein_coding	713.596	1.23826	5.38117e-07	1.50466e-05	12.6812	zinc finger and SCAN domain containing 29 [Source:HGNC Symbol;Acc:HGNC:26673]
ENSG00000140307.10	GTF2A2	protein_coding	929.235	-0.611945	0.00350792	0.0156538	20.1118	general transcription factor IIA subunit 2 [Source:HGNC Symbol;Acc:HGNC:4647]
ENSG00000140350.15	ANP32A	protein_coding	8064.34	-0.598693	0.00122978	0.00693957	76.0541	acidic nuclear phosphoprotein 32 family member A [Source:HGNC Symbol;Acc:HGNC:13233]
ENSG00000140391.14	TSPAN3	protein_coding	3130.42	-0.807537	1.45742e-05	0.000214049	27.9245	tetraspanin 3 [Source:HGNC Symbol;Acc:HGNC:17752]
ENSG00000140395.8	WDR61	protein_coding	3436.36	-0.630657	0.00102874	0.00603344	32.6013	WD repeat domain 61 [Source:HGNC Symbol;Acc:HGNC:30300]
ENSG00000140398.13	NEIL1	protein_coding	332.502	1.21727	1.42957e-06	3.34808e-05	6.06278	nei like DNA glycosylase 1 [Source:HGNC Symbol;Acc:HGNC:18448]
ENSG00000140400.14	MAN2C1	protein_coding	7905.26	-0.677957	0.00262797	0.0125286	67.7427	mannosidase alpha class 2C member 1 [Source:HGNC Symbol;Acc:HGNC:6827]
ENSG00000140450.8	ARRDC4	protein_coding	3908.59	-0.722673	0.00042636	0.00304135	75.5316	arrestin domain containing 4 [Source:HGNC Symbol;Acc:HGNC:28087]
ENSG00000140451.12	PIF1	protein_coding	1420.33	-1.05194	3.51764e-06	6.80672e-05	25.7132	PIF1 5'-to-3' DNA helicase [Source:HGNC Symbol;Acc:HGNC:26220]
ENSG00000140464.19	PML	protein_coding	5227.73	-0.669197	0.00214936	0.0106874	30.9879	promyelocytic leukemia [Source:HGNC Symbol;Acc:HGNC:9113]
ENSG00000140470.13	ADAMTS17	protein_coding	231.421	1.13012	3.76747e-05	0.000452096	3.51696	ADAM metallopeptidase with thrombospondin type 1 motif 17 [Source:HGNC Symbol;Acc:HGNC:17109]
ENSG00000140471.16	LINS1	protein_coding	1586.9	-0.671054	0.00286048	0.0133734	15.5485	lines homolog 1 [Source:HGNC Symbol;Acc:HGNC:30922]
ENSG00000140534.13	TICRR	protein_coding	5488.94	-1.06577	3.22321e-08	1.48479e-06	51.044	TOPBP1 interacting checkpoint and replication regulator [Source:HGNC Symbol;Acc:HGNC:28704]
ENSG00000140848.16	CPNE2	protein_coding	342.721	1.09355	1.01735e-05	0.000160641	5.06048	copine 2 [Source:HGNC Symbol;Acc:HGNC:2315]
ENSG00000140859.15	KIFC3	protein_coding	465.608	-1.04773	4.30098e-06	8.08658e-05	3.91896	kinesin family member C3 [Source:HGNC Symbol;Acc:HGNC:6326]
ENSG00000140931.19	CMTM3	protein_coding	107.757	0.951203	0.00404091	0.0174385	3.97351	CKLF like MARVEL transmembrane domain containing 3 [Source:HGNC Symbol;Acc:HGNC:19174]
ENSG00000140937.13	CDH11	protein_coding	264.08	1.67615	2.82648e-08	1.34012e-06	2.72005	cadherin 11 [Source:HGNC Symbol;Acc:HGNC:1750]
ENSG00000140948.11	ZCCHC14	protein_coding	2183.87	0.908245	0.000341519	0.00255092	33.0704	zinc finger CCHC-type containing 14 [Source:HGNC Symbol;Acc:HGNC:24134]
ENSG00000140961.12	OSGIN1	protein_coding	2931.81	-1.08599	1.33043e-07	4.68011e-06	66.1344	oxidative stress induced growth inhibitor 1 [Source:HGNC Symbol;Acc:HGNC:30093]
ENSG00000140987.19	ZSCAN32	protein_coding	935.562	0.599262	0.014314	0.0459269	22.8148	zinc finger and SCAN domain containing 32 [Source:HGNC Symbol;Acc:HGNC:20812]
ENSG00000141040.14	ZNF287	protein_coding	326.746	1.07818	0.000112942	0.00108694	10.9808	zinc finger protein 287 [Source:HGNC Symbol;Acc:HGNC:13502]
ENSG00000141219.15	C17orf80	protein_coding	1296.25	0.809537	0.000930622	0.00555632	29.0721	chromosome 17 open reading frame 80 [Source:HGNC Symbol;Acc:HGNC:29601]
ENSG00000141232.4	TOB1	protein_coding	8586.48	-0.737983	0.000180517	0.00156156	250.717	transducer of ERBB2, 1 [Source:HGNC Symbol;Acc:HGNC:11979]
ENSG00000141337.12	ARSG	protein_coding	628.422	1.37616	2.2876e-10	2.37584e-08	11.768	arylsulfatase G [Source:HGNC Symbol;Acc:HGNC:24102]
ENSG00000141349.8	G6PC3	protein_coding	611.318	-0.636249	0.00484273	0.0199079	9.41928	glucose-6-phosphatase catalytic subunit 3 [Source:HGNC Symbol;Acc:HGNC:24861]
ENSG00000141378.14	PTRH2	protein_coding	5371.43	-0.631026	0.00778922	0.0287632	90.7188	peptidyl-tRNA hydrolase 2 [Source:HGNC Symbol;Acc:HGNC:24265]
ENSG00000141424.12	SLC39A6	protein_coding	85307.2	-0.844811	1.26675e-06	3.03646e-05	1812.01	solute carrier family 39 member 6 [Source:HGNC Symbol;Acc:HGNC:18607]
ENSG00000141429.13	GALNT1	protein_coding	3719.88	1.00492	5.04108e-08	2.14007e-06	83.2922	polypeptide N-acetylgalactosaminyltransferase 1 [Source:HGNC Symbol;Acc:HGNC:4123]
ENSG00000141447.16	OSBPL1A	protein_coding	923.036	0.792209	0.0002662	0.00210356	11.6542	oxysterol binding protein like 1A [Source:HGNC Symbol;Acc:HGNC:16398]
ENSG00000141449.14	GREB1L	protein_coding	966.322	0.795099	0.000135811	0.00125577	9.4281	GREB1 like retinoic acid receptor coactivator [Source:HGNC Symbol;Acc:HGNC:31042]
ENSG00000141456.14	PELP1	protein_coding	4764.53	-0.665666	0.000269736	0.00212231	53.182	proline, glutamate and leucine rich protein 1 [Source:HGNC Symbol;Acc:HGNC:30134]
ENSG00000141458.12	NPC1	protein_coding	8558.71	-1.26422	2.61508e-11	3.70958e-09	69.5925	NPC intracellular cholesterol transporter 1 [Source:HGNC Symbol;Acc:HGNC:7897]
ENSG00000141499.16	WRAP53	protein_coding	1003.55	-1.0581	5.04837e-06	9.19457e-05	16.4992	WD repeat containing antisense to TP53 [Source:HGNC Symbol;Acc:HGNC:25522]
ENSG00000141524.15	TMC6	protein_coding	1826.42	-0.620784	0.00179965	0.00937602	14.6612	transmembrane channel like 6 [Source:HGNC Symbol;Acc:HGNC:18021]
ENSG00000141526.14	SLC16A3	protein_coding	1483	-0.624221	0.00119351	0.00678879	12.218	solute carrier family 16 member 3 [Source:HGNC Symbol;Acc:HGNC:10924]
ENSG00000141543.9	EIF4A3	protein_coding	5753.57	-0.935742	5.29956e-05	0.00059656	98.9941	eukaryotic translation initiation factor 4A3 [Source:HGNC Symbol;Acc:HGNC:18683]
ENSG00000141552.17	ANAPC11	protein_coding	3472.31	-1.03907	8.03418e-07	2.08292e-05	70.3922	anaphase promoting complex subunit 11 [Source:HGNC Symbol;Acc:HGNC:14452]
ENSG00000141562.17	NARF	protein_coding	8062.31	-0.718661	0.000715267	0.00453653	77.0237	nuclear prelamin A recognition factor [Source:HGNC Symbol;Acc:HGNC:29916]
ENSG00000141568.19	FOXK2	protein_coding	3860.02	-0.62077	0.000907795	0.00545214	27.3681	forkhead box K2 [Source:HGNC Symbol;Acc:HGNC:6036]
ENSG00000141579.6	ZNF750	protein_coding	286.489	-1.29482	3.76653e-07	1.11011e-05	6.54798	zinc finger protein 750 [Source:HGNC Symbol;Acc:HGNC:25843]
ENSG00000141580.15	WDR45B	protein_coding	27392.9	-1.63713	1.40911e-11	2.28103e-09	778.652	WD repeat domain 45B [Source:HGNC Symbol;Acc:HGNC:25072]
ENSG00000141582.14	CBX4	protein_coding	6571.78	-0.678165	0.00115782	0.00663001	171.032	chromobox 4 [Source:HGNC Symbol;Acc:HGNC:1554]
ENSG00000141655.15	TNFRSF11A	protein_coding	1323.75	0.671953	0.000503336	0.00345756	14.6945	TNF receptor superfamily member 11a [Source:HGNC Symbol;Acc:HGNC:11908]
ENSG00000141736.13	ERBB2	protein_coding	7451.04	-0.604975	0.000610251	0.00401402	53.9564	erb-b2 receptor tyrosine kinase 2 [Source:HGNC Symbol;Acc:HGNC:3430]
ENSG00000141738.13	GRB7	protein_coding	2747.58	-1.04372	2.70241e-06	5.49553e-05	64.5066	growth factor receptor bound protein 7 [Source:HGNC Symbol;Acc:HGNC:4567]
ENSG00000141741.11	MIEN1	protein_coding	1017.9	-1.05981	3.67966e-06	7.06301e-05	37.1437	migration and invasion enhancer 1 [Source:HGNC Symbol;Acc:HGNC:28230]
ENSG00000141753.6	IGFBP4	protein_coding	6736.14	-0.968473	4.82178e-06	8.93105e-05	241.348	insulin like growth factor binding protein 4 [Source:HGNC Symbol;Acc:HGNC:5473]
ENSG00000141759.14	TXNL4A	protein_coding	1460.32	-0.718566	0.000383372	0.0027864	19.7978	thioredoxin like 4A [Source:HGNC Symbol;Acc:HGNC:30551]
ENSG00000141854.7	CTB-55O6.8	protein_coding	2259.57	-1.12642	2.01575e-05	0.000277154	95.0666	MISP family member 3 [Source:HGNC Symbol;Acc:HGNC:26963]
ENSG00000141858.11	SAMD1	protein_coding	2831	-0.595985	0.00221998	0.0109419	85.7729	sterile alpha motif domain containing 1 [Source:HGNC Symbol;Acc:HGNC:17958]
ENSG00000141867.17	BRD4	protein_coding	6278.76	-0.741362	0.000436956	0.00310045	39.4178	bromodomain containing 4 [Source:HGNC Symbol;Acc:HGNC:13575]
ENSG00000141971.12	MVB12A	protein_coding	1625.3	-0.879363	0.000109638	0.00106394	32.356	multivesicular body subunit 12A [Source:HGNC Symbol;Acc:HGNC:25153]
ENSG00000141985.9	SH3GL1	protein_coding	8550.28	-1.11684	2.98504e-07	9.29873e-06	196.146	SH3 domain containing GRB2 like 1, endophilin A2 [Source:HGNC Symbol;Acc:HGNC:10830]
ENSG00000142149.8	HUNK	protein_coding	170.539	1.44886	3.37303e-05	0.000412422	2.91681	hormonally up-regulated Neu-associated kinase [Source:HGNC Symbol;Acc:HGNC:13326]
ENSG00000142173.14	COL6A2	protein_coding	1878.96	0.835649	2.25309e-05	0.000303333	36.149	collagen type VI alpha 2 chain [Source:HGNC Symbol;Acc:HGNC:2212]
ENSG00000142197.12	DOPEY2	protein_coding	4080.2	-0.596044	0.00316945	0.0144573	39.2044	DOP1 leucine zipper like protein B [Source:HGNC Symbol;Acc:HGNC:1291]
ENSG00000142252.10	GEMIN7	protein_coding	2157.12	-1.01402	6.21501e-07	1.69702e-05	87.9358	gem nuclear organelle associated protein 7 [Source:HGNC Symbol;Acc:HGNC:20045]
ENSG00000142279.12	WTIP	protein_coding	325.35	0.993633	0.000142378	0.00129995	2.80903	WT1 interacting protein [Source:HGNC Symbol;Acc:HGNC:20964]
ENSG00000142444.6	C19orf52	protein_coding	1453.23	-0.600236	0.00320429	0.0145823	53.6864	translocase of inner mitochondrial membrane 29 [Source:HGNC Symbol;Acc:HGNC:25152]
ENSG00000142546.13	NOSIP	protein_coding	2363.99	0.662357	0.000548232	0.00369184	53.7169	nitric oxide synthase interacting protein [Source:HGNC Symbol;Acc:HGNC:17946]
ENSG00000142552.7	RCN3	protein_coding	295.341	-1.00701	0.000215403	0.00179054	11.5486	reticulocalbin 3 [Source:HGNC Symbol;Acc:HGNC:21145]
ENSG00000142556.18	ZNF614	protein_coding	497.385	0.784498	0.00561383	0.0223937	8.94829	zinc finger protein 614 [Source:HGNC Symbol;Acc:HGNC:24722]
ENSG00000142606.15	MMEL1	protein_coding	1898.73	-1.08863	5.84569e-06	0.000102922	43.8078	membrane metalloendopeptidase like 1 [Source:HGNC Symbol;Acc:HGNC:14668]
ENSG00000142627.12	EPHA2	protein_coding	2176.19	-0.712276	0.000211421	0.00176501	38.7501	EPH receptor A2 [Source:HGNC Symbol;Acc:HGNC:3386]
ENSG00000142655.12	PEX14	protein_coding	1301.81	-0.79143	0.000576169	0.00385025	34.1325	peroxisomal biogenesis factor 14 [Source:HGNC Symbol;Acc:HGNC:8856]
ENSG00000142657.20	PGD	protein_coding	7859.05	-0.81628	6.43091e-06	0.000110876	200.285	phosphogluconate dehydrogenase [Source:HGNC Symbol;Acc:HGNC:8891]
ENSG00000142669.13	SH3BGRL3	protein_coding	2485.52	-0.800686	3.27978e-05	0.000403281	101.968	SH3 domain binding glutamate rich protein like 3 [Source:HGNC Symbol;Acc:HGNC:15568]
ENSG00000142731.10	PLK4	protein_coding	2465.57	-0.794204	2.63791e-05	0.000342396	41.2351	polo like kinase 4 [Source:HGNC Symbol;Acc:HGNC:11397]
ENSG00000142733.14	MAP3K6	protein_coding	1351.29	-0.659379	0.00243432	0.011782	20.1217	mitogen-activated protein kinase kinase kinase 6 [Source:HGNC Symbol;Acc:HGNC:6858]
ENSG00000142867.12	BCL10	protein_coding	2619.37	-0.751119	0.000202706	0.00170039	67.7898	B cell CLL/lymphoma 10 [Source:HGNC Symbol;Acc:HGNC:989]
ENSG00000142871.15	CYR61	protein_coding	604.215	-0.789455	0.00476713	0.0196703	21.7041	cysteine rich angiogenic inducer 61 [Source:HGNC Symbol;Acc:HGNC:2654]
ENSG00000142920.16	AZIN2	protein_coding	134.424	0.79931	0.00951126	0.0335393	2.10447	antizyme inhibitor 2 [Source:HGNC Symbol;Acc:HGNC:29957]
ENSG00000142937.11	RPS8	protein_coding	82322.4	-0.604261	0.0018608	0.00956739	2029.12	ribosomal protein S8 [Source:HGNC Symbol;Acc:HGNC:10441]
ENSG00000142945.12	KIF2C	protein_coding	6555.16	-1.30938	3.85712e-10	3.67754e-08	149.585	kinesin family member 2C [Source:HGNC Symbol;Acc:HGNC:6393]
ENSG00000142961.14	MOB3C	protein_coding	480.096	0.617936	0.00796641	0.0292689	8.62433	MOB kinase activator 3C [Source:HGNC Symbol;Acc:HGNC:29800]
ENSG00000143033.17	MTF2	protein_coding	2429.12	-0.830595	0.000602683	0.00397716	34.731	metal response element binding transcription factor 2 [Source:HGNC Symbol;Acc:HGNC:29535]
ENSG00000143158.10	MPC2	protein_coding	2047.07	-1.0662	1.78523e-06	3.99855e-05	67.5562	mitochondrial pyruvate carrier 2 [Source:HGNC Symbol;Acc:HGNC:24515]
ENSG00000143190.21	POU2F1	protein_coding	5242.61	-0.834199	1.41068e-05	0.00020806	24.8068	POU class 2 homeobox 1 [Source:HGNC Symbol;Acc:HGNC:9212]
ENSG00000143198.12	MGST3	protein_coding	3373.04	-0.599487	0.00140852	0.00776242	30.5884	microsomal glutathione S-transferase 3 [Source:HGNC Symbol;Acc:HGNC:7064]
ENSG00000143217.8	PVRL4	protein_coding	11078.2	-1.38637	1.23577e-07	4.3914e-06	318.717	nectin cell adhesion molecule 4 [Source:HGNC Symbol;Acc:HGNC:19688]
ENSG00000143228.12	NUF2	protein_coding	1589.49	-0.636559	0.00115654	0.00662493	34.0218	NDC80 kinetochore complex component NUF2 [Source:HGNC Symbol;Acc:HGNC:14621]
ENSG00000143256.4	PFDN2	protein_coding	671.816	-0.589392	0.0156878	0.0493416	74.6615	prefoldin subunit 2 [Source:HGNC Symbol;Acc:HGNC:8867]
ENSG00000143333.6	RGS16	protein_coding	86.6474	1.00421	0.00469415	0.0194566	4.49003	regulator of G protein signaling 16 [Source:HGNC Symbol;Acc:HGNC:9997]
ENSG00000143341.11	HMCN1	protein_coding	9273.46	0.709653	0.000668206	0.00431171	55.5452	hemicentin 1 [Source:HGNC Symbol;Acc:HGNC:19194]
ENSG00000143375.14	CGN	protein_coding	12766.8	-1.09844	1.12737e-06	2.77048e-05	169.017	cingulin [Source:HGNC Symbol;Acc:HGNC:17429]
ENSG00000143376.12	SNX27	protein_coding	9014.3	-0.647837	0.000802491	0.00498642	84.4231	sorting nexin family member 27 [Source:HGNC Symbol;Acc:HGNC:20073]
ENSG00000143384.12	MCL1	protein_coding	35123.8	-0.71151	0.00011042	0.00106974	595.647	MCL1, BCL2 family apoptosis regulator [Source:HGNC Symbol;Acc:HGNC:6943]
ENSG00000143387.12	CTSK	protein_coding	478.396	0.841038	0.00090078	0.00542146	28.8362	cathepsin K [Source:HGNC Symbol;Acc:HGNC:2536]
ENSG00000143390.17	RFX5	protein_coding	1624.59	1.37551	1.87559e-07	6.30545e-06	46.9222	regulatory factor X5 [Source:HGNC Symbol;Acc:HGNC:9986]
ENSG00000143401.14	ANP32E	protein_coding	9884.8	-0.614667	0.000477541	0.00331297	213.729	acidic nuclear phosphoprotein 32 family member E [Source:HGNC Symbol;Acc:HGNC:16673]
ENSG00000143434.15	SEMA6C	protein_coding	462.595	1.75718	1.04522e-12	2.76318e-10	11.439	semaphorin 6C [Source:HGNC Symbol;Acc:HGNC:10740]
ENSG00000143494.15	VASH2	protein_coding	128.262	1.26026	0.000446107	0.00315001	2.50873	vasohibin 2 [Source:HGNC Symbol;Acc:HGNC:25723]
ENSG00000143507.17	DUSP10	protein_coding	740.831	-1.36372	9.04155e-07	2.28633e-05	25.5949	dual specificity phosphatase 10 [Source:HGNC Symbol;Acc:HGNC:3065]
ENSG00000143554.13	SLC27A3	protein_coding	4172.65	-0.600047	0.00111292	0.00641291	54.6858	solute carrier family 27 member 3 [Source:HGNC Symbol;Acc:HGNC:10997]
ENSG00000143569.18	UBAP2L	protein_coding	14109.2	-0.851315	2.93962e-05	0.00037211	145.695	ubiquitin associated protein 2 like [Source:HGNC Symbol;Acc:HGNC:29877]
ENSG00000143570.17	SLC39A1	protein_coding	18486.6	-1.0891	8.19506e-08	3.19168e-06	461.269	solute carrier family 39 member 1 [Source:HGNC Symbol;Acc:HGNC:12876]
ENSG00000143590.13	EFNA3	protein_coding	2697.88	-0.939639	0.000157771	0.00140678	124.623	ephrin A3 [Source:HGNC Symbol;Acc:HGNC:3223]
ENSG00000143614.8	GATAD2B	protein_coding	4631.5	-1.07579	3.01328e-07	9.33848e-06	46.5415	GATA zinc finger domain containing 2B [Source:HGNC Symbol;Acc:HGNC:30778]
ENSG00000143633.12	C1orf131	protein_coding	796.557	-0.70724	0.00430333	0.0182865	11.7926	chromosome 1 open reading frame 131 [Source:HGNC Symbol;Acc:HGNC:25332]
ENSG00000143669.13	LYST	protein_coding	1051.86	-0.917163	6.62046e-06	0.000113695	4.22005	lysosomal trafficking regulator [Source:HGNC Symbol;Acc:HGNC:1968]
ENSG00000143751.9	SDE2	protein_coding	1673.52	-0.86603	4.15094e-05	0.000491354	32.2854	SDE2 telomere maintenance homolog [Source:HGNC Symbol;Acc:HGNC:26643]
ENSG00000143753.12	DEGS1	protein_coding	1248.71	0.617089	0.00452732	0.0189795	54.0748	delta 4-desaturase, sphingolipid 1 [Source:HGNC Symbol;Acc:HGNC:13709]
ENSG00000143761.13	ARF1	protein_coding	21409	-0.6291	0.00166616	0.00883083	471.571	ADP ribosylation factor 1 [Source:HGNC Symbol;Acc:HGNC:652]
ENSG00000143774.16	GUK1	protein_coding	8429.29	-1.09861	5.01155e-06	9.15618e-05	161.933	guanylate kinase 1 [Source:HGNC Symbol;Acc:HGNC:4693]
ENSG00000143776.18	CDC42BPA	protein_coding	1525.32	0.768947	0.00407074	0.0175417	11.3043	CDC42 binding protein kinase alpha [Source:HGNC Symbol;Acc:HGNC:1737]
ENSG00000143793.12	C1orf35	protein_coding	1040.92	-0.695548	0.00202902	0.010239	18.2118	chromosome 1 open reading frame 35 [Source:HGNC Symbol;Acc:HGNC:19032]
ENSG00000143811.16	PYCR2	protein_coding	837.141	-0.618728	0.00433761	0.0183874	16.6221	pyrroline-5-carboxylate reductase 2 [Source:HGNC Symbol;Acc:HGNC:30262]
ENSG00000143815.14	LBR	protein_coding	2507.62	-0.657472	0.000438919	0.00311058	38.4398	lamin B receptor [Source:HGNC Symbol;Acc:HGNC:6518]
ENSG00000143816.7	WNT9A	protein_coding	534.738	-0.826922	0.000290761	0.00225877	9.85343	Wnt family member 9A [Source:HGNC Symbol;Acc:HGNC:12778]
ENSG00000143845.14	ETNK2	protein_coding	257.586	0.698498	0.00760355	0.028197	6.1082	ethanolamine kinase 2 [Source:HGNC Symbol;Acc:HGNC:25575]
ENSG00000143850.12	PLEKHA6	protein_coding	3740.55	1.04348	0.000135124	0.00125273	56.9391	pleckstrin homology domain containing A6 [Source:HGNC Symbol;Acc:HGNC:17053]
ENSG00000143862.7	ARL8A	protein_coding	8117.69	-1.3507	8.69487e-09	5.23131e-07	379.341	ADP ribosylation factor like GTPase 8A [Source:HGNC Symbol;Acc:HGNC:25192]
ENSG00000143889.15	HNRNPLL	protein_coding	3227.24	-0.649795	0.00176502	0.0092342	40.0673	heterogeneous nuclear ribonucleoprotein L like [Source:HGNC Symbol;Acc:HGNC:25127]
ENSG00000143947.12	RPS27A	protein_coding	60348.5	-0.617868	0.00184305	0.00950284	1378.41	ribosomal protein S27a [Source:HGNC Symbol;Acc:HGNC:10417]
ENSG00000143977.13	SNRPG	protein_coding	1571.72	-1.21564	1.30142e-06	3.09839e-05	82.4318	small nuclear ribonucleoprotein polypeptide G [Source:HGNC Symbol;Acc:HGNC:11163]
ENSG00000143995.19	MEIS1	protein_coding	2712.96	-0.682005	0.00148973	0.00809238	18.5829	Meis homeobox 1 [Source:HGNC Symbol;Acc:HGNC:7000]
ENSG00000144026.11	ZNF514	protein_coding	1664.27	1.08792	8.86229e-06	0.000143708	28.1296	zinc finger protein 514 [Source:HGNC Symbol;Acc:HGNC:25894]
ENSG00000144028.14	SNRNP200	protein_coding	42936.2	-0.693282	0.000385902	0.00280084	280.762	small nuclear ribonucleoprotein U5 subunit 200 [Source:HGNC Symbol;Acc:HGNC:30859]
ENSG00000144029.11	MRPS5	protein_coding	5344.46	-0.76377	0.000180075	0.00155851	58.6422	mitochondrial ribosomal protein S5 [Source:HGNC Symbol;Acc:HGNC:14498]
ENSG00000144115.16	THNSL2	protein_coding	1290.72	0.817905	0.000185233	0.00159288	22.4087	threonine synthase like 2 [Source:HGNC Symbol;Acc:HGNC:25602]
ENSG00000144134.18	RABL2A	protein_coding	212.747	1.57939	3.48522e-07	1.04127e-05	4.93353	RAB, member of RAS oncogene family like 2A [Source:HGNC Symbol;Acc:HGNC:9799]
ENSG00000144136.10	SLC20A1	protein_coding	1414.13	-0.882774	1.54892e-05	0.000224838	18.9048	solute carrier family 20 member 1 [Source:HGNC Symbol;Acc:HGNC:10946]
ENSG00000144228.8	SPOPL	protein_coding	7199.05	-0.632065	0.00105222	0.00612791	77.7346	speckle type BTB/POZ protein like [Source:HGNC Symbol;Acc:HGNC:27934]
ENSG00000144306.13	SCRN3	protein_coding	715.124	1.07476	1.29891e-05	0.000195205	20.4237	secernin 3 [Source:HGNC Symbol;Acc:HGNC:30382]
ENSG00000144354.13	CDCA7	protein_coding	51.7405	1.44858	0.000852618	0.00520885	2.34529	cell division cycle associated 7 [Source:HGNC Symbol;Acc:HGNC:14628]
ENSG00000144362.11	PHOSPHO2	protein_coding	156.261	0.763923	0.0138888	0.0449011	11.4113	phosphatase, orphan 2 [Source:HGNC Symbol;Acc:HGNC:28316]
ENSG00000144395.17	CCDC150	protein_coding	402.727	-0.75235	0.00340821	0.0153027	3.25478	coiled-coil domain containing 150 [Source:HGNC Symbol;Acc:HGNC:26834]
ENSG00000144401.14	METTL21A	protein_coding	1315.85	-0.893784	2.96371e-05	0.000374444	22.3066	methyltransferase like 21A [Source:HGNC Symbol;Acc:HGNC:30476]
ENSG00000144452.14	ABCA12	protein_coding	1828.85	0.78412	0.000580106	0.00386472	20.2523	ATP binding cassette subfamily A member 12 [Source:HGNC Symbol;Acc:HGNC:14637]
ENSG00000144580.13	RQCD1	protein_coding	3493.35	-0.957951	3.46985e-06	6.72688e-05	52.3919	CCR4-NOT transcription complex subunit 9 [Source:HGNC Symbol;Acc:HGNC:10445]
ENSG00000144635.8	DYNC1LI1	protein_coding	2120.26	-0.725333	0.000770878	0.00482435	26.2751	dynein cytoplasmic 1 light intermediate chain 1 [Source:HGNC Symbol;Acc:HGNC:18745]
ENSG00000144648.15	ACKR2	protein_coding	47.9517	1.30514	0.00255453	0.0122214	1.21148	atypical chemokine receptor 2 [Source:HGNC Symbol;Acc:HGNC:1565]
ENSG00000144655.14	CSRNP1	protein_coding	4255.53	-1.6814	1.50931e-09	1.18624e-07	146.693	cysteine and serine rich nuclear protein 1 [Source:HGNC Symbol;Acc:HGNC:14300]
ENSG00000144677.14	CTDSPL	protein_coding	286.742	0.949804	0.000257514	0.00205823	5.36467	CTD small phosphatase like [Source:HGNC Symbol;Acc:HGNC:16890]
ENSG00000144713.12	RPL32	protein_coding	93196.3	-0.618657	0.001846	0.00951239	1776.06	ribosomal protein L32 [Source:HGNC Symbol;Acc:HGNC:10336]
ENSG00000144724.18	PTPRG	protein_coding	1011.64	0.689586	0.00430879	0.0183008	7.2455	protein tyrosine phosphatase, receptor type G [Source:HGNC Symbol;Acc:HGNC:9671]
ENSG00000144730.16	IL17RD	protein_coding	684.374	0.949751	6.18999e-05	0.000673336	7.48415	interleukin 17 receptor D [Source:HGNC Symbol;Acc:HGNC:17616]
ENSG00000144741.17	SLC25A26	protein_coding	1514.14	-0.863122	3.54736e-05	0.000431019	19.1982	solute carrier family 25 member 26 [Source:HGNC Symbol;Acc:HGNC:20661]
ENSG00000144791.9	LIMD1	protein_coding	3911.99	-0.916744	4.35382e-06	8.17711e-05	23.5251	LIM domains containing 1 [Source:HGNC Symbol;Acc:HGNC:6612]
ENSG00000144893.12	MED12L	protein_coding	444.064	-0.909912	6.66811e-05	0.000712027	3.05448	mediator complex subunit 12 like [Source:HGNC Symbol;Acc:HGNC:16050]
ENSG00000144935.14	TRPC1	protein_coding	677.34	0.841206	0.00177712	0.00927623	15.9985	transient receptor potential cation channel subfamily C member 1 [Source:HGNC Symbol;Acc:HGNC:12333]
ENSG00000144959.9	NCEH1	protein_coding	757.734	-0.85866	6.71781e-05	0.000716895	13.882	neutral cholesterol ester hydrolase 1 [Source:HGNC Symbol;Acc:HGNC:29260]
ENSG00000145014.17	TMEM44	protein_coding	1297.5	0.732379	0.00069902	0.00446268	30.0884	transmembrane protein 44 [Source:HGNC Symbol;Acc:HGNC:25120]
ENSG00000145022.4	TCTA	protein_coding	543.578	0.996405	6.10975e-05	0.000666268	24.5424	T cell leukemia translocation altered [Source:HGNC Symbol;Acc:HGNC:11692]
ENSG00000145029.11	NICN1	protein_coding	408.264	0.632261	0.0115312	0.0387588	16.0229	nicolin 1 [Source:HGNC Symbol;Acc:HGNC:18317]
ENSG00000145041.15	VPRBP	protein_coding	2806.28	-0.614207	0.00147179	0.00803748	33.0548	DDB1 and CUL4 associated factor 1 [Source:HGNC Symbol;Acc:HGNC:30911]
ENSG00000145194.17	ECE2	protein_coding	1579.65	-1.3069	1.14547e-08	6.51013e-07	20.7081	endothelin converting enzyme 2 [Source:HGNC Symbol;Acc:HGNC:13275]
ENSG00000145287.10	PLAC8	protein_coding	58.1404	1.56793	0.000195018	0.00164858	2.37574	placenta specific 8 [Source:HGNC Symbol;Acc:HGNC:19254]
ENSG00000145386.9	CCNA2	protein_coding	4971.65	-1.13928	1.59358e-09	1.23577e-07	147.182	cyclin A2 [Source:HGNC Symbol;Acc:HGNC:1578]
ENSG00000145391.13	SETD7	protein_coding	6470.79	1.26666	8.3544e-09	5.04386e-07	54.1889	SET domain containing lysine methyltransferase 7 [Source:HGNC Symbol;Acc:HGNC:30412]
ENSG00000145414.8	NAF1	protein_coding	721.923	-0.607907	0.0136073	0.0441876	11.4017	nuclear assembly factor 1 ribonucleoprotein [Source:HGNC Symbol;Acc:HGNC:25126]
ENSG00000145416.13	MARCH1	protein_coding	138.141	1.0805	0.000599205	0.00396305	1.6074	membrane associated ring-CH-type finger 1 [Source:HGNC Symbol;Acc:HGNC:26077]
ENSG00000145425.9	RPS3A	protein_coding	28374.1	-0.605318	0.00228714	0.0111938	866.429	ribosomal protein S3A [Source:HGNC Symbol;Acc:HGNC:10421]
ENSG00000145431.10	PDGFC	protein_coding	114.133	1.167	0.000563581	0.00377335	2.403	platelet derived growth factor C [Source:HGNC Symbol;Acc:HGNC:8801]
ENSG00000145451.12	GLRA3	protein_coding	649.868	1.59733	2.36002e-07	7.61139e-06	10.2021	glycine receptor alpha 3 [Source:HGNC Symbol;Acc:HGNC:4328]
ENSG00000145491.11	ROPN1L	protein_coding	171.934	-0.832603	0.00366147	0.016137	8.19519	rhophilin associated tail protein 1 like [Source:HGNC Symbol;Acc:HGNC:24060]
ENSG00000145526.11	CDH18	protein_coding	193.074	1.62686	2.52939e-07	8.06817e-06	5.64596	cadherin 18 [Source:HGNC Symbol;Acc:HGNC:1757]
ENSG00000145592.13	RPL37	protein_coding	75060	-0.636682	0.00217728	0.0107832	682.405	ribosomal protein L37 [Source:HGNC Symbol;Acc:HGNC:10347]
ENSG00000145623.12	OSMR	protein_coding	1016.32	-0.903585	7.44452e-06	0.000125257	11.1772	oncostatin M receptor [Source:HGNC Symbol;Acc:HGNC:8507]
ENSG00000145725.19	PPIP5K2	protein_coding	2633.09	1.04813	3.93396e-08	1.74819e-06	16.9738	diphosphoinositol pentakisphosphate kinase 2 [Source:HGNC Symbol;Acc:HGNC:29035]
ENSG00000145780.7	FEM1C	protein_coding	6308.64	-1.33233	1.96922e-07	6.54457e-06	107.642	fem-1 homolog C [Source:HGNC Symbol;Acc:HGNC:16933]
ENSG00000145808.8	ADAMTS19	protein_coding	1288.31	1.12457	3.65458e-08	1.65195e-06	29.2045	ADAM metallopeptidase with thrombospondin type 1 motif 19 [Source:HGNC Symbol;Acc:HGNC:17111]
ENSG00000145919.10	BOD1	protein_coding	12580.7	-0.590488	0.00647243	0.0248801	462.436	biorientation of chromosomes in cell division 1 [Source:HGNC Symbol;Acc:HGNC:25114]
ENSG00000146066.2	HIGD2A	protein_coding	5464.46	-0.619435	0.0010334	0.00604747	565.571	HIG1 hypoxia inducible domain family member 2A [Source:HGNC Symbol;Acc:HGNC:28311]
ENSG00000146067.15	FAM193B	protein_coding	4979.35	-0.894043	0.000318875	0.00242745	75.7562	family with sequence similarity 193 member B [Source:HGNC Symbol;Acc:HGNC:25524]
ENSG00000146151.12	HMGCLL1	protein_coding	1538.51	0.720534	0.000304354	0.00233423	33.9027	3-hydroxymethyl-3-methylglutaryl-CoA lyase like 1 [Source:HGNC Symbol;Acc:HGNC:21359]
ENSG00000146242.8	TPBG	protein_coding	18276.5	-0.79176	7.3574e-05	0.000773324	211.816	trophoblast glycoprotein [Source:HGNC Symbol;Acc:HGNC:12004]
ENSG00000146243.13	IRAK1BP1	protein_coding	71.9258	1.33187	0.000870933	0.00528558	1.34856	interleukin 1 receptor associated kinase 1 binding protein 1 [Source:HGNC Symbol;Acc:HGNC:17368]
ENSG00000146247.13	PHIP	protein_coding	11576.2	-0.603204	0.00169116	0.0089254	60.9567	pleckstrin homology domain interacting protein [Source:HGNC Symbol;Acc:HGNC:15673]
ENSG00000146410.11	MTFR2	protein_coding	611.17	-1.11461	4.07721e-07	1.18841e-05	20.2504	mitochondrial fission regulator 2 [Source:HGNC Symbol;Acc:HGNC:21115]
ENSG00000146457.14	WTAP	protein_coding	2940.18	-0.711367	0.0036642	0.016137	42.0314	WT1 associated protein [Source:HGNC Symbol;Acc:HGNC:16846]
ENSG00000146463.11	ZMYM4	protein_coding	2777.85	0.845793	0.000147978	0.00133778	40.7372	zinc finger MYM-type containing 4 [Source:HGNC Symbol;Acc:HGNC:13055]
ENSG00000146670.9	CDCA5	protein_coding	3686.47	-1.07791	4.63223e-07	1.33361e-05	78.5604	cell division cycle associated 5 [Source:HGNC Symbol;Acc:HGNC:14626]
ENSG00000146674.14	IGFBP3	protein_coding	9030.7	1.02595	5.1526e-08	2.16633e-06	236.764	insulin like growth factor binding protein 3 [Source:HGNC Symbol;Acc:HGNC:5472]
ENSG00000146701.11	MDH2	protein_coding	13526.3	-0.663977	0.000467112	0.00326018	259.566	malate dehydrogenase 2 [Source:HGNC Symbol;Acc:HGNC:6971]
ENSG00000146733.13	PSPH	protein_coding	169.511	0.818072	0.00776187	0.0286865	7.07548	phosphoserine phosphatase [Source:HGNC Symbol;Acc:HGNC:9577]
ENSG00000146834.13	MEPCE	protein_coding	2640.44	0.749835	0.0018034	0.00938714	85.9463	methylphosphate capping enzyme [Source:HGNC Symbol;Acc:HGNC:20247]
ENSG00000146950.12	SHROOM2	protein_coding	1886.48	-0.593381	0.00253207	0.0121373	16.7159	shroom family member 2 [Source:HGNC Symbol;Acc:HGNC:630]
ENSG00000147003.5	TMEM27	protein_coding	247.888	0.672059	0.00962623	0.0338217	15.7451	collectrin, amino acid transport regulator [Source:HGNC Symbol;Acc:HGNC:29437]
ENSG00000147041.11	SYTL5	protein_coding	2291.14	0.994265	0.000152273	0.00136811	54.5095	synaptotagmin like 5 [Source:HGNC Symbol;Acc:HGNC:15589]
ENSG00000147100.9	SLC16A2	protein_coding	904.792	-0.819661	7.34945e-05	0.000772955	18.6849	solute carrier family 16 member 2 [Source:HGNC Symbol;Acc:HGNC:10923]
ENSG00000147119.3	CHST7	protein_coding	173.765	-0.860476	0.00446405	0.0187928	5.89244	carbohydrate sulfotransferase 7 [Source:HGNC Symbol;Acc:HGNC:13817]
ENSG00000147124.12	ZNF41	protein_coding	603.383	1.31317	1.57087e-05	0.000227646	15.5806	zinc finger protein 41 [Source:HGNC Symbol;Acc:HGNC:13107]
ENSG00000147155.10	EBP	protein_coding	3111.97	-0.937415	1.30359e-06	3.09839e-05	96.7615	EBP, cholestenol delta-isomerase [Source:HGNC Symbol;Acc:HGNC:3133]
ENSG00000147164.11	SNX12	protein_coding	3315.84	-0.660918	0.000610339	0.00401402	97.6404	sorting nexin 12 [Source:HGNC Symbol;Acc:HGNC:14976]
ENSG00000147174.11	ACRC	protein_coding	51.2627	1.64234	0.000350288	0.00259525	2.24707	germ cell nuclear acidic peptidase [Source:HGNC Symbol;Acc:HGNC:15805]
ENSG00000147180.16	ZNF711	protein_coding	449.376	0.718353	0.0016259	0.00864109	8.95767	zinc finger protein 711 [Source:HGNC Symbol;Acc:HGNC:13128]
ENSG00000147257.13	GPC3	protein_coding	186.784	0.71566	0.0108435	0.0369668	7.09438	glypican 3 [Source:HGNC Symbol;Acc:HGNC:4451]
ENSG00000147364.16	FBXO25	protein_coding	1512.71	0.985431	5.51862e-05	0.000616446	14.202	F-box protein 25 [Source:HGNC Symbol;Acc:HGNC:13596]
ENSG00000147383.10	NSDHL	protein_coding	3087.55	-0.633152	0.000618704	0.00405833	113.719	NAD(P) dependent steroid dehydrogenase-like [Source:HGNC Symbol;Acc:HGNC:13398]
ENSG00000147408.14	CSGALNACT1	protein_coding	1105.14	1.51927	1.14858e-13	3.7112e-11	20.1053	chondroitin sulfate N-acetylgalactosaminyltransferase 1 [Source:HGNC Symbol;Acc:HGNC:24290]
ENSG00000147457.13	CHMP7	protein_coding	2757.4	-0.58745	0.00221612	0.0109321	42.0793	charged multivesicular body protein 7 [Source:HGNC Symbol;Acc:HGNC:28439]
ENSG00000147475.14	ERLIN2	protein_coding	2884.21	1.05916	3.15764e-06	6.2324e-05	36.2476	ER lipid raft associated 2 [Source:HGNC Symbol;Acc:HGNC:1356]
ENSG00000147576.15	ADHFE1	protein_coding	220.658	1.15167	0.000126819	0.00119285	7.07113	alcohol dehydrogenase, iron containing 1 [Source:HGNC Symbol;Acc:HGNC:16354]
ENSG00000147592.8	LACTB2	protein_coding	340.169	0.659582	0.00950021	0.0335133	17.9458	lactamase beta 2 [Source:HGNC Symbol;Acc:HGNC:18512]
ENSG00000147601.13	TERF1	protein_coding	1607.99	-0.758804	0.000480628	0.00333174	13.8971	telomeric repeat binding factor 1 [Source:HGNC Symbol;Acc:HGNC:11728]
ENSG00000147604.13	RPL7	protein_coding	50737.1	-0.598831	0.0030316	0.0139794	1261.6	ribosomal protein L7 [Source:HGNC Symbol;Acc:HGNC:10363]
ENSG00000147669.10	POLR2K	protein_coding	1650.79	-0.895573	0.00019263	0.00163566	81.9909	RNA polymerase II subunit K [Source:HGNC Symbol;Acc:HGNC:9198]
ENSG00000147799.11	ARHGAP39	protein_coding	699.018	0.854352	0.000330033	0.00248637	16.3489	Rho GTPase activating protein 39 [Source:HGNC Symbol;Acc:HGNC:29351]
ENSG00000147852.15	VLDLR	protein_coding	8562.59	-0.904914	5.13223e-07	1.44431e-05	71.7225	very low density lipoprotein receptor [Source:HGNC Symbol;Acc:HGNC:12698]
ENSG00000147853.16	AK3	protein_coding	4124.25	-0.768926	0.000233625	0.00190748	111.309	adenylate kinase 3 [Source:HGNC Symbol;Acc:HGNC:17376]
ENSG00000147854.16	UHRF2	protein_coding	5487.49	-0.742621	0.000624327	0.0040906	43.2239	ubiquitin like with PHD and ring finger domains 2 [Source:HGNC Symbol;Acc:HGNC:12557]
ENSG00000147872.9	PLIN2	protein_coding	3231.61	-1.49098	9.43841e-15	4.2226e-12	53.8011	perilipin 2 [Source:HGNC Symbol;Acc:HGNC:248]
ENSG00000147883.10	CDKN2B	protein_coding	288.978	0.80295	0.00184496	0.00950984	8.03825	cyclin dependent kinase inhibitor 2B [Source:HGNC Symbol;Acc:HGNC:1788]
ENSG00000147894.14	C9orf72	protein_coding	941.93	-0.64503	0.00242926	0.0117608	12.2623	chromosome 9 open reading frame 72 [Source:HGNC Symbol;Acc:HGNC:28337]
ENSG00000147912.12	FBXO10	protein_coding	75.7799	1.0447	0.00768752	0.0284781	1.63541	F-box protein 10 [Source:HGNC Symbol;Acc:HGNC:13589]
ENSG00000147996.16	CBWD5	protein_coding	221.824	-0.652819	0.0145753	0.0465685	1.291	COBW domain containing 5 [Source:HGNC Symbol;Acc:HGNC:24584]
ENSG00000148057.15	IDNK	protein_coding	394.692	1.19162	9.54548e-07	2.39985e-05	26.5924	IDNK, gluconokinase [Source:HGNC Symbol;Acc:HGNC:31367]
ENSG00000148120.14	C9orf3	protein_coding	1513.57	0.696028	0.000637982	0.00416287	15.8449	chromosome 9 open reading frame 3 [Source:HGNC Symbol;Acc:HGNC:1361]
ENSG00000148154.9	UGCG	protein_coding	9712.34	-1.30062	6.15231e-10	5.5049e-08	184.601	UDP-glucose ceramide glucosyltransferase [Source:HGNC Symbol;Acc:HGNC:12524]
ENSG00000148175.12	STOM	protein_coding	6428.54	-0.655009	0.00080038	0.0049804	151.426	stomatin [Source:HGNC Symbol;Acc:HGNC:3383]
ENSG00000148200.16	NR6A1	protein_coding	500.593	0.635585	0.00731135	0.027299	6.97525	nuclear receptor subfamily 6 group A member 1 [Source:HGNC Symbol;Acc:HGNC:7985]
ENSG00000148225.15	WDR31	protein_coding	789.701	1.16805	1.55168e-06	3.57174e-05	17.5399	WD repeat domain 31 [Source:HGNC Symbol;Acc:HGNC:21421]
ENSG00000148297.15	MED22	protein_coding	1849.62	0.755573	0.000878402	0.00532165	28.5808	mediator complex subunit 22 [Source:HGNC Symbol;Acc:HGNC:11477]
ENSG00000148303.16	RPL7A	protein_coding	151508	-0.587998	0.00233737	0.0113969	4680.99	ribosomal protein L7a [Source:HGNC Symbol;Acc:HGNC:10364]
ENSG00000148308.17	GTF3C5	protein_coding	8831.76	-0.610107	0.00156541	0.00840409	169.485	general transcription factor IIIC subunit 5 [Source:HGNC Symbol;Acc:HGNC:4668]
ENSG00000148339.12	SLC25A25	protein_coding	4700.9	-1.72035	6.50664e-12	1.22073e-09	99.7105	solute carrier family 25 member 25 [Source:HGNC Symbol;Acc:HGNC:20663]
ENSG00000148344.10	PTGES	protein_coding	418.074	-2.05792	1.12509e-15	6.41001e-13	26.3065	prostaglandin E synthase [Source:HGNC Symbol;Acc:HGNC:9599]
ENSG00000148362.10	C9orf142	protein_coding	2203.52	-0.848088	0.000112166	0.00108221	128.414	PAXX, non-homologous end joining factor [Source:HGNC Symbol;Acc:HGNC:27849]
ENSG00000148426.12	PROSER2	protein_coding	1572.44	-0.911082	1.81152e-05	0.000254693	33.413	proline and serine rich 2 [Source:HGNC Symbol;Acc:HGNC:23728]
ENSG00000148488.15	ST8SIA6	protein_coding	1339	0.674114	0.0069729	0.0263377	54.203	ST8 alpha-N-acetyl-neuraminide alpha-2,8-sialyltransferase 6 [Source:HGNC Symbol;Acc:HGNC:23317]
ENSG00000148572.14	NRBF2	protein_coding	1073.98	-0.65024	0.0036026	0.0159377	42.9887	nuclear receptor binding factor 2 [Source:HGNC Symbol;Acc:HGNC:19692]
ENSG00000148671.13	ADIRF	protein_coding	242.826	-0.778393	0.0090555	0.0322582	20.473	adipogenesis regulatory factor [Source:HGNC Symbol;Acc:HGNC:24043]
ENSG00000148719.14	DNAJB12	protein_coding	1237.76	0.907708	2.32014e-05	0.000309968	24.9665	DnaJ heat shock protein family (Hsp40) member B12 [Source:HGNC Symbol;Acc:HGNC:14891]
ENSG00000148735.14	PLEKHS1	protein_coding	95.4472	1.6376	3.71022e-06	7.10604e-05	2.70211	pleckstrin homology domain containing S1 [Source:HGNC Symbol;Acc:HGNC:26285]
ENSG00000148773.12	MKI67	protein_coding	19761.2	-0.600604	0.00592863	0.0233142	142.477	marker of proliferation Ki-67 [Source:HGNC Symbol;Acc:HGNC:7107]
ENSG00000148841.15	ITPRIP	protein_coding	641.081	-1.94587	3.4871e-12	7.24321e-10	15.3663	inositol 1,4,5-trisphosphate receptor interacting protein [Source:HGNC Symbol;Acc:HGNC:29370]
ENSG00000148842.17	CNNM2	protein_coding	3275.11	-0.594748	0.0029384	0.01365	14.03	cyclin and CBS domain divalent metal cation transport mediator 2 [Source:HGNC Symbol;Acc:HGNC:103]
ENSG00000148908.14	RGS10	protein_coding	1380.96	-0.722664	0.00148539	0.00808305	98.2799	regulator of G protein signaling 10 [Source:HGNC Symbol;Acc:HGNC:9992]
ENSG00000148926.9	ADM	protein_coding	8208.84	-0.892553	0.000189646	0.00161886	253.475	adrenomedullin [Source:HGNC Symbol;Acc:HGNC:259]
ENSG00000148943.11	LIN7C	protein_coding	1689.61	-0.743487	0.000131943	0.00123175	26.9848	lin-7 homolog C, crumbs cell polarity complex component [Source:HGNC Symbol;Acc:HGNC:17789]
ENSG00000149016.15	TUT1	protein_coding	1244.12	-0.840724	0.000159389	0.00141672	23.8176	terminal uridylyl transferase 1, U6 snRNA-specific [Source:HGNC Symbol;Acc:HGNC:26184]
ENSG00000149177.12	PTPRJ	protein_coding	4221.78	-0.986064	6.84642e-06	0.000116999	49.4476	protein tyrosine phosphatase, receptor type J [Source:HGNC Symbol;Acc:HGNC:9673]
ENSG00000149187.17	CELF1	protein_coding	8600.02	-0.911021	6.01683e-05	0.000657368	107.498	CUGBP Elav-like family member 1 [Source:HGNC Symbol;Acc:HGNC:2549]
ENSG00000149212.11	SESN3	protein_coding	950.068	0.703681	0.00217014	0.0107691	9.77764	sestrin 3 [Source:HGNC Symbol;Acc:HGNC:23060]
ENSG00000149218.4	ENDOD1	protein_coding	2702.99	-1.11215	5.30873e-08	2.21066e-06	45.9863	endonuclease domain containing 1 [Source:HGNC Symbol;Acc:HGNC:29129]
ENSG00000149256.14	TENM4	protein_coding	196.419	1.42088	2.55397e-06	5.27982e-05	1.64605	teneurin transmembrane protein 4 [Source:HGNC Symbol;Acc:HGNC:29945]
ENSG00000149260.14	CAPN5	protein_coding	2943.41	-0.781346	2.92897e-05	0.00037167	36.5343	calpain 5 [Source:HGNC Symbol;Acc:HGNC:1482]
ENSG00000149292.16	TTC12	protein_coding	351.58	1.3829	9.078e-07	2.29223e-05	8.3857	tetratricopeptide repeat domain 12 [Source:HGNC Symbol;Acc:HGNC:23700]
ENSG00000149346.14	SLX4IP	protein_coding	1626.36	0.860014	6.00659e-05	0.00065666	27.5286	SLX4 interacting protein [Source:HGNC Symbol;Acc:HGNC:16225]
ENSG00000149418.10	ST14	protein_coding	7256.75	-0.673553	0.000176037	0.00153345	123.445	suppression of tumorigenicity 14 [Source:HGNC Symbol;Acc:HGNC:11344]
ENSG00000149474.13	CSRP2BP	protein_coding	373.576	1.62791	1.35719e-07	4.74556e-06	11.7749	lysine acetyltransferase 14 [Source:HGNC Symbol;Acc:HGNC:15904]
ENSG00000149503.12	INCENP	protein_coding	5187	-0.781046	7.4376e-05	0.000780345	93.3449	inner centromere protein [Source:HGNC Symbol;Acc:HGNC:6058]
ENSG00000149541.9	B3GAT3	protein_coding	3529.74	-1.05716	1.88448e-08	9.50301e-07	115.548	beta-1,3-glucuronyltransferase 3 [Source:HGNC Symbol;Acc:HGNC:923]
ENSG00000149547.14	EI24	protein_coding	2940.61	-0.63541	0.00181016	0.00940547	59.5086	EI24, autophagy associated transmembrane protein [Source:HGNC Symbol;Acc:HGNC:13276]
ENSG00000149557.12	FEZ1	protein_coding	419.775	0.848149	0.000600857	0.00396661	8.10062	fasciculation and elongation protein zeta 1 [Source:HGNC Symbol;Acc:HGNC:3659]
ENSG00000149582.15	TMEM25	protein_coding	338.72	0.672019	0.00748218	0.0278356	6.56978	transmembrane protein 25 [Source:HGNC Symbol;Acc:HGNC:25890]
ENSG00000149596.6	JPH2	protein_coding	896.122	-0.950083	1.78157e-05	0.000251138	12.0512	junctophilin 2 [Source:HGNC Symbol;Acc:HGNC:14202]
ENSG00000149657.19	LSM14B	protein_coding	12513.1	-0.955673	1.96665e-06	4.30541e-05	291.041	LSM family member 14B [Source:HGNC Symbol;Acc:HGNC:15887]
ENSG00000149743.13	TRPT1	protein_coding	2601.49	-0.728376	0.000212879	0.00177548	84.511	tRNA phosphotransferase 1 [Source:HGNC Symbol;Acc:HGNC:20316]
ENSG00000149925.16	ALDOA	protein_coding	1.38854e+06	-0.855611	0.000162377	0.00143817	18207.3	aldolase, fructose-bisphosphate A [Source:HGNC Symbol;Acc:HGNC:414]
ENSG00000150051.13	MKX	protein_coding	58.0622	1.90368	4.97529e-06	9.109e-05	2.28243	mohawk homeobox [Source:HGNC Symbol;Acc:HGNC:23729]
ENSG00000150076.22	CCDC7	protein_coding	64.6653	1.21435	0.00172068	0.0090456	2.25054	NA
ENSG00000150316.11	CWC15	protein_coding	1848.18	-0.795918	0.00129021	0.00721062	56.4336	CWC15 spliceosome associated protein homolog [Source:HGNC Symbol;Acc:HGNC:26939]
ENSG00000150457.8	LATS2	protein_coding	3555.88	-1.26499	5.64867e-08	2.3355e-06	58.2004	large tumor suppressor kinase 2 [Source:HGNC Symbol;Acc:HGNC:6515]
ENSG00000150556.16	LYPD6B	protein_coding	1166.16	-0.624872	0.00348558	0.015574	22.1625	LY6/PLAUR domain containing 6B [Source:HGNC Symbol;Acc:HGNC:27018]
ENSG00000150667.6	FSIP1	protein_coding	122.117	-0.925715	0.00353949	0.0157503	3.37142	fibrous sheath interacting protein 1 [Source:HGNC Symbol;Acc:HGNC:21674]
ENSG00000150672.16	DLG2	protein_coding	270.926	0.728308	0.00892237	0.0319028	1.82423	discs large MAGUK scaffold protein 2 [Source:HGNC Symbol;Acc:HGNC:2901]
ENSG00000150676.12	CCDC83	protein_coding	839.355	-0.919358	7.19396e-05	0.000758972	34.1589	coiled-coil domain containing 83 [Source:HGNC Symbol;Acc:HGNC:28535]
ENSG00000150756.13	FAM173B	protein_coding	366.429	1.36366	7.51963e-07	1.96968e-05	19.7998	family with sequence similarity 173 member B [Source:HGNC Symbol;Acc:HGNC:27029]
ENSG00000150760.12	DOCK1	protein_coding	849.888	1.07943	6.9247e-06	0.000117875	12.7505	dedicator of cytokinesis 1 [Source:HGNC Symbol;Acc:HGNC:2987]
ENSG00000150893.10	FREM2	protein_coding	2048.58	1.40986	1.48838e-09	1.18176e-07	16.1123	FRAS1 related extracellular matrix protein 2 [Source:HGNC Symbol;Acc:HGNC:25396]
ENSG00000150961.14	SEC24D	protein_coding	3914.65	-0.72893	0.000121664	0.00115126	29.8551	SEC24 homolog D, COPII coat complex component [Source:HGNC Symbol;Acc:HGNC:10706]
ENSG00000150967.17	ABCB9	protein_coding	1570.8	-0.760086	7.06011e-05	0.000748389	9.08918	ATP binding cassette subfamily B member 9 [Source:HGNC Symbol;Acc:HGNC:50]
ENSG00000150990.7	DHX37	protein_coding	993.428	1.0735	2.50694e-07	8.02589e-06	16.6308	DEAH-box helicase 37 [Source:HGNC Symbol;Acc:HGNC:17210]
ENSG00000150991.14	UBC	protein_coding	122044	-0.897404	0.000123886	0.00117031	2661.94	ubiquitin C [Source:HGNC Symbol;Acc:HGNC:12468]
ENSG00000151006.7	PRSS53	protein_coding	1491.5	-0.642944	0.00143137	0.00787095	18.8261	serine protease 53 [Source:HGNC Symbol;Acc:HGNC:34407]
ENSG00000151014.5	NOCT	protein_coding	1221.51	-1.78511	1.83088e-10	1.95982e-08	54.185	nocturnin [Source:HGNC Symbol;Acc:HGNC:14254]
ENSG00000151025.9	GPR158	protein_coding	92.6152	1.31756	0.000436854	0.00310045	1.53271	G protein-coupled receptor 158 [Source:HGNC Symbol;Acc:HGNC:23689]
ENSG00000151065.13	DCP1B	protein_coding	896.795	0.65535	0.00284698	0.0133318	18.8675	decapping mRNA 1B [Source:HGNC Symbol;Acc:HGNC:24451]
ENSG00000151090.17	THRB	protein_coding	2051.63	0.604504	0.00713931	0.0267713	25.4303	thyroid hormone receptor beta [Source:HGNC Symbol;Acc:HGNC:11799]
ENSG00000151092.16	NGLY1	protein_coding	6697.22	-0.868283	5.45378e-06	9.79996e-05	64.052	N-glycanase 1 [Source:HGNC Symbol;Acc:HGNC:17646]
ENSG00000151116.16	UEVLD	protein_coding	545.202	0.808776	0.00489943	0.0200905	10.7096	UEV and lactate/malate dehyrogenase domains [Source:HGNC Symbol;Acc:HGNC:30866]
ENSG00000151135.9	TMEM263	protein_coding	6797.07	-0.725976	0.00105118	0.00612614	112.256	transmembrane protein 263 [Source:HGNC Symbol;Acc:HGNC:28281]
ENSG00000151151.5	IPMK	protein_coding	2398.84	-1.02404	2.23434e-07	7.25973e-06	34.7971	inositol polyphosphate multikinase [Source:HGNC Symbol;Acc:HGNC:20739]
ENSG00000151247.12	EIF4E	protein_coding	1241.08	-1.39766	1.88377e-08	9.50301e-07	8.43956	eukaryotic translation initiation factor 4E [Source:HGNC Symbol;Acc:HGNC:3287]
ENSG00000151276.23	MAGI1	protein_coding	1076.75	0.590503	0.00858821	0.0310165	8.93839	membrane associated guanylate kinase, WW and PDZ domain containing 1 [Source:HGNC Symbol;Acc:HGNC:946]
ENSG00000151332.18	MBIP	protein_coding	1574.55	-0.752418	0.000765822	0.00479787	35.3212	MAP3K12 binding inhibitory protein 1 [Source:HGNC Symbol;Acc:HGNC:20427]
ENSG00000151413.16	NUBPL	protein_coding	856.828	0.928428	2.58647e-05	0.000336782	12.0698	nucleotide binding protein like [Source:HGNC Symbol;Acc:HGNC:20278]
ENSG00000151414.14	NEK7	protein_coding	4513.77	-0.705839	0.000192343	0.00163548	58.3321	NIMA related kinase 7 [Source:HGNC Symbol;Acc:HGNC:13386]
ENSG00000151458.11	ANKRD50	protein_coding	11439.5	-0.731744	0.000272062	0.00213441	96.5883	ankyrin repeat domain 50 [Source:HGNC Symbol;Acc:HGNC:29223]
ENSG00000151470.12	C4orf33	protein_coding	468.893	1.09291	3.99542e-06	7.61049e-05	7.77749	chromosome 4 open reading frame 33 [Source:HGNC Symbol;Acc:HGNC:27025]
ENSG00000151474.19	FRMD4A	protein_coding	627.887	1.37719	2.88666e-08	1.36494e-06	5.9196	FERM domain containing 4A [Source:HGNC Symbol;Acc:HGNC:25491]
ENSG00000151503.12	NCAPD3	protein_coding	1727.94	-1.1833	1.66714e-09	1.28142e-07	15.355	non-SMC condensin II complex subunit D3 [Source:HGNC Symbol;Acc:HGNC:28952]
ENSG00000151553.14	FAM160B1	protein_coding	3625.73	-0.782075	3.15099e-05	0.000392423	42.8971	family with sequence similarity 160 member B1 [Source:HGNC Symbol;Acc:HGNC:29320]
ENSG00000151575.14	TEX9	protein_coding	78.0281	1.88114	6.26407e-07	1.70774e-05	1.37585	testis expressed 9 [Source:HGNC Symbol;Acc:HGNC:29585]
ENSG00000151687.14	ANKAR	protein_coding	197.634	1.3144	3.5239e-06	6.80896e-05	4.32417	ankyrin and armadillo repeat containing [Source:HGNC Symbol;Acc:HGNC:26350]
ENSG00000151690.14	MFSD6	protein_coding	1011.96	1.31702	1.89359e-07	6.35372e-06	20.8335	major facilitator superfamily domain containing 6 [Source:HGNC Symbol;Acc:HGNC:24711]
ENSG00000151692.14	RNF144A	protein_coding	434.452	1.04666	4.78472e-05	0.000547794	7.36043	ring finger protein 144A [Source:HGNC Symbol;Acc:HGNC:20457]
ENSG00000151726.13	ACSL1	protein_coding	3678.13	-0.90733	1.00635e-05	0.000159771	44.8884	acyl-CoA synthetase long chain family member 1 [Source:HGNC Symbol;Acc:HGNC:3569]
ENSG00000151729.10	SLC25A4	protein_coding	1578.6	-1.57771	3.30658e-15	1.69686e-12	28.4689	solute carrier family 25 member 4 [Source:HGNC Symbol;Acc:HGNC:10990]
ENSG00000151773.12	CCDC122	protein_coding	481.246	0.755196	0.00356691	0.015836	9.42563	coiled-coil domain containing 122 [Source:HGNC Symbol;Acc:HGNC:26478]
ENSG00000151835.13	SACS	protein_coding	293.995	1.1568	0.000663149	0.00428701	2.33372	sacsin molecular chaperone [Source:HGNC Symbol;Acc:HGNC:10519]
ENSG00000151876.12	FBXO4	protein_coding	282.105	1.20839	1.74115e-05	0.000246989	12.3411	F-box protein 4 [Source:HGNC Symbol;Acc:HGNC:13583]
ENSG00000151883.16	PARP8	protein_coding	400.798	0.90538	0.000201756	0.00169324	4.5184	poly(ADP-ribose) polymerase family member 8 [Source:HGNC Symbol;Acc:HGNC:26124]
ENSG00000151893.14	CACUL1	protein_coding	4881.09	-0.587391	0.00130867	0.00729746	28.0472	CDK2 associated cullin domain 1 [Source:HGNC Symbol;Acc:HGNC:23727]
ENSG00000152056.16	AP1S3	protein_coding	493.177	-0.691306	0.00227731	0.0111708	8.459	adaptor related protein complex 1 subunit sigma 3 [Source:HGNC Symbol;Acc:HGNC:18971]
ENSG00000152082.13	MZT2B	protein_coding	10175.4	-0.806616	5.50428e-05	0.000615665	419.684	mitotic spindle organizing protein 2B [Source:HGNC Symbol;Acc:HGNC:25886]
ENSG00000152102.17	FAM168B	protein_coding	13538.8	-0.803195	2.15072e-05	0.000291579	180.522	family with sequence similarity 168 member B [Source:HGNC Symbol;Acc:HGNC:27016]
ENSG00000152117.17	AC093838.4	transcribed_processed_pseudogene	2206.23	-1.17689	2.52212e-07	8.0597e-06	49.797
ENSG00000152127.8	MGAT5	protein_coding	3968.92	0.609111	0.0103246	0.0356368	44.3856	alpha-1,6-mannosylglycoprotein 6-beta-N-acetylglucosaminyltransferase [Source:HGNC Symbol;Acc:HGNC:7049]
ENSG00000152137.6	HSPB8	protein_coding	381.461	-1.51658	3.54802e-10	3.50874e-08	11.5419	heat shock protein family B (small) member 8 [Source:HGNC Symbol;Acc:HGNC:30171]
ENSG00000152242.10	C18orf25	protein_coding	2283.27	-0.732803	0.000807218	0.00500687	18.0037	chromosome 18 open reading frame 25 [Source:HGNC Symbol;Acc:HGNC:28172]
ENSG00000152284.4	TCF7L1	protein_coding	266.753	0.838242	0.00105639	0.00614604	6.50118	transcription factor 7 like 1 [Source:HGNC Symbol;Acc:HGNC:11640]
ENSG00000152332.15	UHMK1	protein_coding	11258.4	-0.627354	0.000388771	0.00282049	91.7804	U2AF homology motif kinase 1 [Source:HGNC Symbol;Acc:HGNC:19683]
ENSG00000152382.5	TADA1	protein_coding	1835.09	-0.880461	7.09672e-05	0.000751813	49.7122	transcriptional adaptor 1 [Source:HGNC Symbol;Acc:HGNC:30631]
ENSG00000152413.14	HOMER1	protein_coding	1479.87	-0.806681	5.41826e-05	0.000607569	20.9312	homer scaffold protein 1 [Source:HGNC Symbol;Acc:HGNC:17512]
ENSG00000152443.12	ZNF776	protein_coding	1176.36	0.783367	0.000920051	0.00551462	23.2359	zinc finger protein 776 [Source:HGNC Symbol;Acc:HGNC:26765]
ENSG00000152454.3	ZNF256	protein_coding	428.944	0.735225	0.00278823	0.0131236	19.692	zinc finger protein 256 [Source:HGNC Symbol;Acc:HGNC:13049]
ENSG00000152464.14	RPP38	protein_coding	869.712	-0.884345	0.000309139	0.00236572	37.7102	ribonuclease P/MRP subunit p38 [Source:HGNC Symbol;Acc:HGNC:30329]
ENSG00000152484.13	USP12	protein_coding	3936.38	-0.939108	8.42639e-07	2.15175e-05	58.4557	ubiquitin specific peptidase 12 [Source:HGNC Symbol;Acc:HGNC:20485]
ENSG00000152503.9	TRIM36	protein_coding	550.422	-0.928954	3.78588e-05	0.000453167	8.02985	tripartite motif containing 36 [Source:HGNC Symbol;Acc:HGNC:16280]
ENSG00000152518.6	ZFP36L2	protein_coding	4173.32	1.06326	1.46034e-06	3.40842e-05	142.349	ZFP36 ring finger protein like 2 [Source:HGNC Symbol;Acc:HGNC:1108]
ENSG00000152582.12	SPEF2	protein_coding	615.837	1.33678	1.38195e-08	7.60642e-07	5.1728	sperm flagellar 2 [Source:HGNC Symbol;Acc:HGNC:26293]
ENSG00000152620.12	NADK2	protein_coding	1192.73	0.700553	0.000614519	0.00403543	23.9436	NAD kinase 2, mitochondrial [Source:HGNC Symbol;Acc:HGNC:26404]
ENSG00000152642.10	GPD1L	protein_coding	10823.7	-0.650636	0.000271422	0.00213227	183.257	glycerol-3-phosphate dehydrogenase 1 like [Source:HGNC Symbol;Acc:HGNC:28956]
ENSG00000152684.10	PELO	protein_coding	3832.52	-1.59519	4.24024e-10	4.02086e-08	90.1389	pelota mRNA surveillance and ribosome rescue factor [Source:HGNC Symbol;Acc:HGNC:8829]
ENSG00000152926.14	ZNF117	protein_coding	3306.22	1.28698	1.60557e-10	1.72926e-08	39.8725	zinc finger protein 117 [Source:HGNC Symbol;Acc:HGNC:12897]
ENSG00000152952.11	PLOD2	protein_coding	35464	-0.722888	6.55792e-05	0.000703274	340.151	procollagen-lysine,2-oxoglutarate 5-dioxygenase 2 [Source:HGNC Symbol;Acc:HGNC:9082]
ENSG00000153048.10	CARHSP1	protein_coding	8702.36	-0.675638	0.00161435	0.00859548	119.201	calcium regulated heat stable protein 1 [Source:HGNC Symbol;Acc:HGNC:17150]
ENSG00000153179.11	RASSF3	protein_coding	9219.35	-1.11946	7.12185e-07	1.87424e-05	217.344	Ras association domain family member 3 [Source:HGNC Symbol;Acc:HGNC:14271]
ENSG00000153310.18	FAM49B	protein_coding	6696.85	-0.636915	0.00105862	0.00615694	51.821	family with sequence similarity 49 member B [Source:HGNC Symbol;Acc:HGNC:25216]
ENSG00000153443.12	UBALD1	protein_coding	1878.78	-1.14988	4.56057e-06	8.50137e-05	48.3764	UBA like domain containing 1 [Source:HGNC Symbol;Acc:HGNC:29576]
ENSG00000153485.5	TMEM251	protein_coding	910.417	-0.625004	0.00443161	0.0186996	47.9383	transmembrane protein 251 [Source:HGNC Symbol;Acc:HGNC:20218]
ENSG00000153487.12	ING1	protein_coding	2014.54	-1.19266	1.14903e-05	0.000177262	31.1592	inhibitor of growth family member 1 [Source:HGNC Symbol;Acc:HGNC:6062]
ENSG00000153531.13	ADPRHL1	protein_coding	933.398	1.02242	1.34075e-06	3.16983e-05	9.03553	ADP-ribosylhydrolase like 1 [Source:HGNC Symbol;Acc:HGNC:21303]
ENSG00000153561.12	RMND5A	protein_coding	6077.67	-0.693733	9.24969e-05	0.000928377	68.6478	required for meiotic nuclear division 5 homolog A [Source:HGNC Symbol;Acc:HGNC:25850]
ENSG00000153714.5	LURAP1L	protein_coding	2503.69	-0.609588	0.00250614	0.0120496	82.9317	leucine rich adaptor protein 1 like [Source:HGNC Symbol;Acc:HGNC:31452]
ENSG00000153774.8	CFDP1	protein_coding	7990.87	-0.897582	6.32393e-05	0.000683643	199.891	craniofacial development protein 1 [Source:HGNC Symbol;Acc:HGNC:1873]
ENSG00000153814.11	JAZF1	protein_coding	264.548	-0.83827	0.00118539	0.00675683	5.17925	JAZF zinc finger 1 [Source:HGNC Symbol;Acc:HGNC:28917]
ENSG00000153879.8	CEBPG	protein_coding	1510.02	0.613107	0.00228431	0.0111841	32.4621	CCAAT enhancer binding protein gamma [Source:HGNC Symbol;Acc:HGNC:1837]
ENSG00000153896.17	ZNF599	protein_coding	292.634	1.11861	0.000293222	0.00227182	5.40909	zinc finger protein 599 [Source:HGNC Symbol;Acc:HGNC:26408]
ENSG00000153914.15	SREK1	protein_coding	8283.73	-0.824609	0.000366429	0.00269539	37.8773	splicing regulatory glutamic acid and lysine rich protein 1 [Source:HGNC Symbol;Acc:HGNC:17882]
ENSG00000153922.10	CHD1	protein_coding	4694.48	-0.680733	0.000691393	0.00442208	32.7427	chromodomain helicase DNA binding protein 1 [Source:HGNC Symbol;Acc:HGNC:1915]
ENSG00000153933.9	DGKE	protein_coding	2581.31	-0.914807	6.96832e-06	0.000118387	17.7051	diacylglycerol kinase epsilon [Source:HGNC Symbol;Acc:HGNC:2852]
ENSG00000153975.9	ZUFSP	protein_coding	1453.94	-0.827493	0.000880126	0.00532655	46.2823	zinc finger containing ubiquitin peptidase 1 [Source:HGNC Symbol;Acc:HGNC:21224]
ENSG00000153982.10	GDPD1	protein_coding	469.949	0.653098	0.0096004	0.0337708	15.8995	glycerophosphodiester phosphodiesterase domain containing 1 [Source:HGNC Symbol;Acc:HGNC:20883]
ENSG00000153993.13	SEMA3D	protein_coding	199.806	1.48493	2.67674e-07	8.46082e-06	3.27108	semaphorin 3D [Source:HGNC Symbol;Acc:HGNC:10726]
ENSG00000154059.9	IMPACT	protein_coding	1178.66	0.810206	0.000152477	0.00136923	25.009	impact RWD domain protein [Source:HGNC Symbol;Acc:HGNC:20387]
ENSG00000154099.17	DNAAF1	protein_coding	573.822	-1.34034	1.97828e-08	9.89021e-07	6.41718	dynein axonemal assembly factor 1 [Source:HGNC Symbol;Acc:HGNC:30539]
ENSG00000154118.12	JPH3	protein_coding	419.375	1.22136	1.57866e-06	3.62904e-05	8.08294	junctophilin 3 [Source:HGNC Symbol;Acc:HGNC:14203]
ENSG00000154124.4	OTULIN	protein_coding	2572.99	-0.699739	0.000279755	0.00218397	21.6006	OTU deubiquitinase with linear linkage specificity [Source:HGNC Symbol;Acc:HGNC:25118]
ENSG00000154127.9	UBASH3B	protein_coding	103.823	1.81944	1.16205e-07	4.20651e-06	1.50763	ubiquitin associated and SH3 domain containing B [Source:HGNC Symbol;Acc:HGNC:29884]
ENSG00000154153.13	FAM134B	protein_coding	240.316	1.36376	4.42937e-06	8.28334e-05	7.25214	reticulophagy regulator 1 [Source:HGNC Symbol;Acc:HGNC:25964]
ENSG00000154162.13	CDH12	protein_coding	104.813	1.83434	2.43574e-07	7.81226e-06	2.62261	cadherin 12 [Source:HGNC Symbol;Acc:HGNC:1751]
ENSG00000154240.16	CEP112	protein_coding	135.92	0.777488	0.0115112	0.0387137	1.88228	centrosomal protein 112 [Source:HGNC Symbol;Acc:HGNC:28514]
ENSG00000154309.8	DISP1	protein_coding	118.591	1.20977	0.000993233	0.00585471	2.65919	dispatched RND transporter family member 1 [Source:HGNC Symbol;Acc:HGNC:19711]
ENSG00000154310.16	TNIK	protein_coding	656.896	-0.692078	0.00376138	0.016502	6.96527	TRAF2 and NCK interacting kinase [Source:HGNC Symbol;Acc:HGNC:30765]
ENSG00000154316.14	TDH	unitary_pseudogene	518.806	-0.696139	0.0113205	0.0382495	22.8447	L-threonine dehydrogenase (pseudogene) [Source:HGNC Symbol;Acc:HGNC:15547]
ENSG00000154330.12	PGM5	protein_coding	368.218	1.6316	9.6834e-08	3.67086e-06	7.484	phosphoglucomutase 5 [Source:HGNC Symbol;Acc:HGNC:8908]
ENSG00000154358.19	OBSCN	protein_coding	5101.65	0.812823	0.000341966	0.00255202	17.9231	obscurin, cytoskeletal calmodulin and titin-interacting RhoGEF [Source:HGNC Symbol;Acc:HGNC:15719]
ENSG00000154429.10	CCSAP	protein_coding	4438.57	-1.56842	1.77995e-12	4.14087e-10	65.4373	centriole, cilia and spindle associated protein [Source:HGNC Symbol;Acc:HGNC:29578]
ENSG00000154473.17	BUB3	protein_coding	11234	-0.683457	0.000422465	0.00302031	97.0355	BUB3, mitotic checkpoint protein [Source:HGNC Symbol;Acc:HGNC:1151]
ENSG00000154511.11	FAM69A	protein_coding	373.379	-0.777038	0.00104807	0.00611543	12.2356	divergent protein kinase domain 1A [Source:HGNC Symbol;Acc:HGNC:32213]
ENSG00000154518.9	ATP5G3	protein_coding	4490.81	-0.950649	1.23143e-06	2.97591e-05	50.7974	ATP synthase membrane subunit c locus 3 [Source:HGNC Symbol;Acc:HGNC:843]
ENSG00000154582.16	TCEB1	protein_coding	2752.99	-0.711576	0.000794819	0.00494932	42.0873	elongin C [Source:HGNC Symbol;Acc:HGNC:11617]
ENSG00000154654.14	NCAM2	protein_coding	1733.76	0.629496	0.00173856	0.00913139	22.7363	neural cell adhesion molecule 2 [Source:HGNC Symbol;Acc:HGNC:7657]
ENSG00000154710.15	RABGEF1	protein_coding	329.295	-0.848346	0.00153022	0.00825068	4.75409	RAB guanine nucleotide exchange factor 1 [Source:HGNC Symbol;Acc:HGNC:17676]
ENSG00000154719.13	MRPL39	protein_coding	1511.51	-1.1199	6.38543e-07	1.73271e-05	105.252	mitochondrial ribosomal protein L39 [Source:HGNC Symbol;Acc:HGNC:14027]
ENSG00000154721.14	JAM2	protein_coding	102.185	1.02531	0.00222219	0.0109466	1.89795	junctional adhesion molecule 2 [Source:HGNC Symbol;Acc:HGNC:14686]
ENSG00000154743.17	TSEN2	protein_coding	212.314	1.07615	0.00030527	0.00234022	4.58941	tRNA splicing endonuclease subunit 2 [Source:HGNC Symbol;Acc:HGNC:28422]
ENSG00000154767.14	XPC	protein_coding	3946.11	0.711042	8.60757e-05	0.000875714	81.4155	XPC complex subunit, DNA damage recognition and repair factor [Source:HGNC Symbol;Acc:HGNC:12816]
ENSG00000154803.12	FLCN	protein_coding	5655.84	-0.786775	0.00023581	0.00192083	44.6984	folliculin [Source:HGNC Symbol;Acc:HGNC:27310]
ENSG00000154813.9	DPH3	protein_coding	448.888	0.995103	2.21531e-05	0.000298939	14.1952	diphthamide biosynthesis 3 [Source:HGNC Symbol;Acc:HGNC:27717]
ENSG00000154930.14	ACSS1	protein_coding	973.318	1.19138	1.4612e-06	3.40842e-05	13.8755	acyl-CoA synthetase short chain family member 1 [Source:HGNC Symbol;Acc:HGNC:16091]
ENSG00000155016.17	CYP2U1	protein_coding	227.158	1.60338	9.36026e-08	3.57369e-06	5.07682	cytochrome P450 family 2 subfamily U member 1 [Source:HGNC Symbol;Acc:HGNC:20582]
ENSG00000155034.18	FBXL18	protein_coding	669.339	-0.977684	1.12634e-05	0.000174533	10.3086	F-box and leucine rich repeat protein 18 [Source:HGNC Symbol;Acc:HGNC:21874]
ENSG00000155085.15	AK9	protein_coding	525.181	1.1507	2.52676e-05	0.000330486	6.39769	adenylate kinase 9 [Source:HGNC Symbol;Acc:HGNC:33814]
ENSG00000155090.14	KLF10	protein_coding	12252.1	-0.920484	0.000188806	0.00161485	270.621	Kruppel like factor 10 [Source:HGNC Symbol;Acc:HGNC:11810]
ENSG00000155099.7	TMEM55A	protein_coding	712.894	-0.695096	0.00227644	0.0111708	16.7908	phosphatidylinositol-4,5-bisphosphate 4-phosphatase 2 [Source:HGNC Symbol;Acc:HGNC:25452]
ENSG00000155100.10	OTUD6B	protein_coding	1822.28	-0.811936	0.000111284	0.00107629	34.7036	OTU domain containing 6B [Source:HGNC Symbol;Acc:HGNC:24281]
ENSG00000155115.6	GTF3C6	protein_coding	457.905	0.890817	0.000154445	0.00138406	50.4523	general transcription factor IIIC subunit 6 [Source:HGNC Symbol;Acc:HGNC:20872]
ENSG00000155189.11	AGPAT5	protein_coding	4771.93	-0.669577	0.00034554	0.0025699	85.6796	1-acylglycerol-3-phosphate O-acyltransferase 5 [Source:HGNC Symbol;Acc:HGNC:20886]
ENSG00000155252.13	PI4K2A	protein_coding	900.951	-0.810524	0.000318738	0.00242745	16.4179	phosphatidylinositol 4-kinase type 2 alpha [Source:HGNC Symbol;Acc:HGNC:30031]
ENSG00000155254.12	MARVELD1	protein_coding	1863.87	0.67247	0.00351695	0.015682	59.4261	MARVEL domain containing 1 [Source:HGNC Symbol;Acc:HGNC:28674]
ENSG00000155265.10	GOLGA7B	protein_coding	539.556	0.601513	0.00844718	0.0306799	8.70792	golgin A7 family member B [Source:HGNC Symbol;Acc:HGNC:31668]
ENSG00000155287.10	SLC25A28	protein_coding	341.615	0.856035	0.00806024	0.029539	20.2837	solute carrier family 25 member 28 [Source:HGNC Symbol;Acc:HGNC:23472]
ENSG00000155304.5	HSPA13	protein_coding	2207.94	-0.788823	3.36161e-05	0.000411314	41.7102	heat shock protein family A (Hsp70) member 13 [Source:HGNC Symbol;Acc:HGNC:11375]
ENSG00000155324.9	GRAMD3	protein_coding	1606.96	-0.836122	3.26359e-05	0.000401574	23.2975	GRAM domain containing 2B [Source:HGNC Symbol;Acc:HGNC:24911]
ENSG00000155330.9	C16orf87	protein_coding	711.291	-0.85034	0.000594682	0.00393627	7.87655	chromosome 16 open reading frame 87 [Source:HGNC Symbol;Acc:HGNC:33754]
ENSG00000155368.16	DBI	protein_coding	6497.92	-0.607511	0.0029521	0.013699	188.615	diazepam binding inhibitor, acyl-CoA binding protein [Source:HGNC Symbol;Acc:HGNC:2690]
ENSG00000155508.13	CNOT8	protein_coding	15172.7	-1.28989	2.0877e-11	3.08696e-09	318.786	CCR4-NOT transcription complex subunit 8 [Source:HGNC Symbol;Acc:HGNC:9207]
ENSG00000155545.19	MIER3	protein_coding	2056.94	-0.702898	0.000258229	0.00206017	25.8613	MIER family member 3 [Source:HGNC Symbol;Acc:HGNC:26678]
ENSG00000155561.14	NUP205	protein_coding	6971.52	-0.734627	0.000135447	0.0012544	65.5679	nucleoporin 205 [Source:HGNC Symbol;Acc:HGNC:18658]
ENSG00000155592.15	ZKSCAN2	protein_coding	246.069	1.60833	1.11382e-07	4.09137e-06	3.92868	zinc finger with KRAB and SCAN domains 2 [Source:HGNC Symbol;Acc:HGNC:25677]
ENSG00000155636.14	RBM45	protein_coding	257.664	1.02185	0.0001763	0.00153412	6.4995	RNA binding motif protein 45 [Source:HGNC Symbol;Acc:HGNC:24468]
ENSG00000155666.11	KDM8	protein_coding	168.142	0.934266	0.00359398	0.0159181	4.73052	lysine demethylase 8 [Source:HGNC Symbol;Acc:HGNC:25840]
ENSG00000155729.12	KCTD18	protein_coding	1988.39	0.630913	0.0018088	0.00940123	39.6426	potassium channel tetramerization domain containing 18 [Source:HGNC Symbol;Acc:HGNC:26446]
ENSG00000155957.17	TMBIM4	protein_coding	378.553	-0.718076	0.00881006	0.0315707	7.51826	transmembrane BAX inhibitor motif containing 4 [Source:HGNC Symbol;Acc:HGNC:24257]
ENSG00000155959.10	VBP1	protein_coding	2466.2	-0.726231	0.000381404	0.00278112	89.8004	VHL binding protein 1 [Source:HGNC Symbol;Acc:HGNC:12662]
ENSG00000155961.4	RAB39B	protein_coding	53.5698	1.07354	0.00758506	0.0281404	1.74108	RAB39B, member RAS oncogene family [Source:HGNC Symbol;Acc:HGNC:16499]
ENSG00000155974.11	GRIP1	protein_coding	212.881	1.46092	1.40472e-06	3.30252e-05	4.49925	glutamate receptor interacting protein 1 [Source:HGNC Symbol;Acc:HGNC:18708]
ENSG00000155975.9	VPS37A	protein_coding	2763.09	-0.992972	2.58038e-06	5.32809e-05	32.677	VPS37A, ESCRT-I subunit [Source:HGNC Symbol;Acc:HGNC:24928]
ENSG00000156030.12	ELMSAN1	protein_coding	27208.7	-1.59659	3.31828e-10	3.34666e-08	210.891	ELM2 and Myb/SANT domain containing 1 [Source:HGNC Symbol;Acc:HGNC:19853]
ENSG00000156103.15	MMP16	protein_coding	376.102	1.13061	8.3411e-05	0.000853081	4.17362	matrix metallopeptidase 16 [Source:HGNC Symbol;Acc:HGNC:7162]
ENSG00000156136.9	DCK	protein_coding	1787.28	-0.60976	0.00218148	0.0108009	39.1407	deoxycytidine kinase [Source:HGNC Symbol;Acc:HGNC:2704]
ENSG00000156171.14	DRAM2	protein_coding	2540.46	-0.697335	0.000611977	0.00402176	58.2133	DNA damage regulated autophagy modulator 2 [Source:HGNC Symbol;Acc:HGNC:28769]
ENSG00000156222.11	SLC28A1	protein_coding	428.764	1.28739	1.33719e-07	4.69441e-06	14.0658	solute carrier family 28 member 1 [Source:HGNC Symbol;Acc:HGNC:11001]
ENSG00000156232.7	WHAMM	protein_coding	1700.68	-1.04952	2.42603e-06	5.08157e-05	27.0969	WAS protein homolog associated with actin, golgi membranes and microtubules [Source:HGNC Symbol;Acc:HGNC:30493]
ENSG00000156239.11	N6AMT1	protein_coding	298.378	1.06565	0.000454175	0.0031902	7.06327	N-6 adenine-specific DNA methyltransferase 1 [Source:HGNC Symbol;Acc:HGNC:16021]
ENSG00000156261.12	CCT8	protein_coding	8678.55	-0.60312	0.00337626	0.0151827	187.755	chaperonin containing TCP1 subunit 8 [Source:HGNC Symbol;Acc:HGNC:1623]
ENSG00000156304.14	SCAF4	protein_coding	2420.18	-0.919033	2.39206e-05	0.000317872	33.131	SR-related CTD associated factor 4 [Source:HGNC Symbol;Acc:HGNC:19304]
ENSG00000156381.8	ANKRD9	protein_coding	5392.96	-1.03885	9.76054e-09	5.75344e-07	62.6917	ankyrin repeat domain 9 [Source:HGNC Symbol;Acc:HGNC:20096]
ENSG00000156384.14	SFR1	protein_coding	396.769	0.822163	0.000489438	0.00337805	22.853	SWI5 dependent homologous recombination repair protein 1 [Source:HGNC Symbol;Acc:HGNC:29574]
ENSG00000156398.12	SFXN2	protein_coding	146.524	1.46743	3.08406e-06	6.1218e-05	2.55003	sideroflexin 2 [Source:HGNC Symbol;Acc:HGNC:16086]
ENSG00000156411.9	C14orf2	protein_coding	5751.52	-0.900118	4.00504e-05	0.000476345	137.453	ATP synthase membrane subunit 6.8PL [Source:HGNC Symbol;Acc:HGNC:1188]
ENSG00000156469.8	MTERF3	protein_coding	1535.55	-0.904444	5.95635e-05	0.000652804	69.2553	mitochondrial transcription termination factor 3 [Source:HGNC Symbol;Acc:HGNC:24258]
ENSG00000156471.12	PTDSS1	protein_coding	6466.19	-0.780024	1.35482e-05	0.000201011	78.7829	phosphatidylserine synthase 1 [Source:HGNC Symbol;Acc:HGNC:9587]
ENSG00000156482.10	RPL30	protein_coding	112518	-0.60987	0.00249781	0.0120226	2011.35	ribosomal protein L30 [Source:HGNC Symbol;Acc:HGNC:10333]
ENSG00000156515.21	HK1	protein_coding	47279.6	-0.610334	0.00159318	0.00851388	573.028	hexokinase 1 [Source:HGNC Symbol;Acc:HGNC:4922]
ENSG00000156535.13	CD109	protein_coding	3017.13	1.22559	5.60296e-09	3.59414e-07	38.4823	CD109 molecule [Source:HGNC Symbol;Acc:HGNC:21685]
ENSG00000156587.15	UBE2L6	protein_coding	147.942	0.816905	0.0115552	0.038817	7.58327	ubiquitin conjugating enzyme E2 L6 [Source:HGNC Symbol;Acc:HGNC:12490]
ENSG00000156642.16	NPTN	protein_coding	6748.5	-0.726983	0.000129327	0.00121121	119.268	neuroplastin [Source:HGNC Symbol;Acc:HGNC:17867]
ENSG00000156671.12	SAMD8	protein_coding	2864.39	-1.25214	8.09108e-11	1.00123e-08	32.5567	sterile alpha motif domain containing 8 [Source:HGNC Symbol;Acc:HGNC:26320]
ENSG00000156735.10	BAG4	protein_coding	1855.94	-0.770176	0.000675399	0.00434538	30.1852	BCL2 associated athanogene 4 [Source:HGNC Symbol;Acc:HGNC:940]
ENSG00000156795.6	WDYHV1	protein_coding	2465.9	-0.84977	9.55035e-05	0.000952741	89.1954	WDYHV motif containing 1 [Source:HGNC Symbol;Acc:HGNC:25490]
ENSG00000156802.12	ATAD2	protein_coding	10970.4	-0.665037	0.000174494	0.00152458	114.605	ATPase family, AAA domain containing 2 [Source:HGNC Symbol;Acc:HGNC:30123]
ENSG00000156804.7	FBXO32	protein_coding	1205.63	-0.624189	0.00431974	0.0183384	11.9096	F-box protein 32 [Source:HGNC Symbol;Acc:HGNC:16731]
ENSG00000156869.12	FRRS1	protein_coding	670.972	-1.20158	1.98422e-06	4.32758e-05	15.5708	ferric chelate reductase 1 [Source:HGNC Symbol;Acc:HGNC:27622]
ENSG00000156875.13	HIAT1	protein_coding	2837.33	-0.907438	4.55302e-05	0.000526449	77.6843	major facilitator superfamily domain containing 14A [Source:HGNC Symbol;Acc:HGNC:23363]
ENSG00000156876.9	SASS6	protein_coding	647.361	-0.696016	0.0018128	0.00941639	11.6665	SAS-6 centriolar assembly protein [Source:HGNC Symbol;Acc:HGNC:25403]
ENSG00000156928.4	MALSU1	protein_coding	813.792	-0.81896	0.000348817	0.00258664	16.3677	mitochondrial assembly of ribosomal large subunit 1 [Source:HGNC Symbol;Acc:HGNC:21721]
ENSG00000156970.12	BUB1B	protein_coding	2704.23	-0.718418	0.000135254	0.00125327	49.9017	BUB1 mitotic checkpoint serine/threonine kinase B [Source:HGNC Symbol;Acc:HGNC:1149]
ENSG00000157107.13	FCHO2	protein_coding	3678.21	-0.736496	9.20042e-05	0.000924706	45.0042	FCH domain only 2 [Source:HGNC Symbol;Acc:HGNC:25180]
ENSG00000157388.13	CACNA1D	protein_coding	861.289	1.07927	5.77776e-05	0.000640879	9.85055	calcium voltage-gated channel subunit alpha1 D [Source:HGNC Symbol;Acc:HGNC:1391]
ENSG00000157404.15	KIT	protein_coding	209.515	1.32047	2.9036e-06	5.8032e-05	4.80581	KIT proto-oncogene receptor tyrosine kinase [Source:HGNC Symbol;Acc:HGNC:6342]
ENSG00000157429.15	ZNF19	protein_coding	179.536	1.69887	1.30155e-07	4.5881e-06	2.70119	zinc finger protein 19 [Source:HGNC Symbol;Acc:HGNC:12981]
[truncated: 2,371 more rows]

## Sheet: siMBNL2_MCF-7_DEGs
GENCODE_gene_id	gene_name	gene_type	baseMean.siMBNL2	log2FoldChange.siMBNL2	pvalue.siMBNL2	padj.siMBNL2	maxTPM.siMBNL2	baseMean.MCF-7	log2FoldChange.MCF-7	pvalue.MCF-7	padj.MCF-7	maxTPM.MCF-7	description
ENSG00000002330.13	BAD	protein_coding	2646.33	-0.74561	0.000176151	0.00153367	110.52	1572.19	0.692881	0.00491888	0.0215806	67.4409	BCL2 associated agonist of cell death [Source:HGNC Symbol;Acc:HGNC:936]
ENSG00000004139.13	SARM1	protein_coding	854.09	1.09552	0.000157787	0.00140678	9.34119	959.849	-0.807037	0.000538266	0.00344121	7.2575	sterile alpha and TIR motif containing 1 [Source:HGNC Symbol;Acc:HGNC:17074]
ENSG00000005022.5	SLC25A5	protein_coding	13453.8	-0.997724	1.49107e-05	0.000217527	779.354	12995.8	-0.790481	0.000291307	0.00204847	741.634	solute carrier family 25 member 5 [Source:HGNC Symbol;Acc:HGNC:10991]
ENSG00000005194.14	CIAPIN1	protein_coding	912.999	-0.760114	0.000323754	0.00245282	18.7051	1040.45	-0.624592	0.0110585	0.0411914	25.8219	cytokine induced apoptosis inhibitor 1 [Source:HGNC Symbol;Acc:HGNC:28050]
ENSG00000005448.16	WDR54	protein_coding	6081.64	-0.615652	0.00716541	0.0268634	165.901	2808.31	1.35179	7.02564e-08	1.42947e-06	91.5956	WD repeat domain 54 [Source:HGNC Symbol;Acc:HGNC:25770]
ENSG00000005882.11	PDK2	protein_coding	1667.6	0.649893	0.00250209	0.0120365	29.3325	1526.58	-0.781095	0.00122559	0.00687587	25.2487	pyruvate dehydrogenase kinase 2 [Source:HGNC Symbol;Acc:HGNC:8810]
ENSG00000006756.15	ARSD	protein_coding	3490.42	0.950298	1.19315e-05	0.000182454	58.5013	5290.19	-1.14411	9.09532e-08	1.79006e-06	71.9854	arylsulfatase D [Source:HGNC Symbol;Acc:HGNC:717]
ENSG00000008226.19	DLEC1	protein_coding	98.5863	1.80018	2.3338e-06	4.91241e-05	1.69903	95.5425	1.73849	0.000117432	0.000956822	1.3673	DLEC1, cilia and flagella associated protein [Source:HGNC Symbol;Acc:HGNC:2899]
ENSG00000008277.14	ADAM22	protein_coding	607.287	1.29445	6.51463e-07	1.75956e-05	6.28879	951.859	-0.950396	0.000912608	0.00537751	7.04525	ADAM metallopeptidase domain 22 [Source:HGNC Symbol;Acc:HGNC:201]
ENSG00000008294.20	SPAG9	protein_coding	23883.4	-0.783686	0.000132483	0.00123519	148.989	21116.3	0.974189	5.7341e-05	0.000515278	152.189	sperm associated antigen 9 [Source:HGNC Symbol;Acc:HGNC:14524]
ENSG00000008710.17	PKD1	protein_coding	15920.4	-0.788053	1.6505e-05	0.000237607	63.1752	4786.62	0.688083	0.00263396	0.012963	19.3934	polycystin 1, transient receptor potential channel interacting [Source:HGNC Symbol;Acc:HGNC:9008]
ENSG00000010361.13	FUZ	protein_coding	486.763	0.995144	1.65013e-05	0.000237607	19.7013	595.865	-1.2573	1.85645e-05	0.000194212	18.992	fuzzy planar cell polarity protein [Source:HGNC Symbol;Acc:HGNC:26219]
ENSG00000011201.10	ANOS1	protein_coding	106.634	1.14973	0.000671098	0.00432348	1.75229	113.001	1.05645	0.00686773	0.0281486	1.36489	anosmin 1 [Source:HGNC Symbol;Acc:HGNC:6211]
ENSG00000011405.13	PIK3C2A	protein_coding	10387.4	-0.841854	1.84486e-05	0.000258756	82.6153	8421.81	0.668662	0.00108938	0.00624607	69.0457	phosphatidylinositol-4-phosphate 3-kinase catalytic subunit type 2 alpha [Source:HGNC Symbol;Acc:HGNC:8971]
ENSG00000011422.11	PLAUR	protein_coding	1617.85	-1.91298	1.70661e-18	1.75159e-15	34.262	288.59	1.69627	2.50884e-06	3.38953e-05	6.94686	plasminogen activator, urokinase receptor [Source:HGNC Symbol;Acc:HGNC:9053]
ENSG00000011478.11	QPCTL	protein_coding	3819.89	-1.33792	1.93572e-08	9.72368e-07	149.985	921.708	0.788255	0.00320159	0.0152725	31.565	glutaminyl-peptide cyclotransferase like [Source:HGNC Symbol;Acc:HGNC:25952]
ENSG00000011485.14	PPP5C	protein_coding	3562.14	-0.651689	0.000840604	0.00516075	35.5376	2749.15	-0.686924	0.00222611	0.0112852	31.264	protein phosphatase 5 catalytic subunit [Source:HGNC Symbol;Acc:HGNC:9322]
ENSG00000012171.17	SEMA3B	protein_coding	19336.6	-0.674332	0.00113015	0.00650042	251.191	2440.4	0.808733	0.00376525	0.0174136	35.7717	semaphorin 3B [Source:HGNC Symbol;Acc:HGNC:10724]
ENSG00000012211.12	PRICKLE3	protein_coding	1858.74	-0.689859	0.00102935	0.00603495	41.016	621.163	1.34381	4.80447e-06	5.97519e-05	18.1199	prickle planar cell polarity protein 3 [Source:HGNC Symbol;Acc:HGNC:6645]
ENSG00000012660.13	ELOVL5	protein_coding	1597.8	-0.916517	4.90978e-06	9.04602e-05	33.4513	3271.81	-0.685324	0.013823	0.0493466	81.8114	ELOVL fatty acid elongase 5 [Source:HGNC Symbol;Acc:HGNC:21308]
ENSG00000012822.15	CALCOCO1	protein_coding	7915.14	0.716412	5.90488e-05	0.000648793	94.0236	6467.8	0.750617	0.000430379	0.0028531	60.7942	calcium binding and coiled-coil domain 1 [Source:HGNC Symbol;Acc:HGNC:29306]
ENSG00000013306.15	SLC25A39	protein_coding	3817.55	-0.70017	0.000690016	0.00441651	80.5383	5411.3	-1.19532	7.6652e-08	1.53642e-06	142.005	solute carrier family 25 member 39 [Source:HGNC Symbol;Acc:HGNC:24279]
ENSG00000013441.15	CLK1	protein_coding	15761.7	-1.17712	1.20044e-06	2.90908e-05	287.201	10151.7	0.821339	0.000676608	0.00416242	160.419	CDC like kinase 1 [Source:HGNC Symbol;Acc:HGNC:2068]
ENSG00000017260.19	ATP2C1	protein_coding	11556.5	-0.842268	6.59716e-06	0.000113406	100.102	5459.44	0.750713	0.00090738	0.00535509	49.0324	ATPase secretory pathway Ca2+ transporting 1 [Source:HGNC Symbol;Acc:HGNC:13211]
ENSG00000019995.6	ZRANB1	protein_coding	3229.2	-0.723143	0.00016615	0.00146192	38.5125	4739.05	0.664805	0.00421212	0.0190613	57.246	zinc finger RANBP2-type containing 1 [Source:HGNC Symbol;Acc:HGNC:18224]
ENSG00000020129.15	NCDN	protein_coding	709.367	0.662813	0.00291899	0.0135824	15.8831	1234.06	-1.60571	6.54174e-07	1.0447e-05	28.7232	neurochondrin [Source:HGNC Symbol;Acc:HGNC:17597]
ENSG00000020181.17	ADGRA2	protein_coding	76.041	1.48683	9.5238e-05	0.000951017	1.51244	218.084	-0.768841	0.0137878	0.0492658	2.62188	adhesion G protein-coupled receptor A2 [Source:HGNC Symbol;Acc:HGNC:17849]
ENSG00000021300.13	PLEKHB1	protein_coding	779.654	1.57252	1.48189e-10	1.63626e-08	21.9286	1175.05	-1.13974	0.0012163	0.00683553	22.9555	pleckstrin homology domain containing B1 [Source:HGNC Symbol;Acc:HGNC:19079]
ENSG00000023228.13	NDUFS1	protein_coding	4245.17	-0.587798	0.00116664	0.00667232	25.9781	9004.25	-0.901394	9.9348e-06	0.000112474	62.7281	NADH:ubiquinone oxidoreductase core subunit S1 [Source:HGNC Symbol;Acc:HGNC:7707]
ENSG00000023902.13	PLEKHO1	protein_coding	977.321	-0.587407	0.00332337	0.0149874	11.0198	482.89	1.36342	2.58997e-05	0.000258245	6.31996	pleckstrin homology domain containing O1 [Source:HGNC Symbol;Acc:HGNC:24310]
ENSG00000024422.11	EHD2	protein_coding	2074.67	0.666901	0.000384801	0.00279401	50.7966	1181.54	2.66794	1.65206e-16	1.6833e-14	34.6665	EH domain containing 2 [Source:HGNC Symbol;Acc:HGNC:3243]
ENSG00000024862.16	CCDC28A	protein_coding	2098.74	-0.65352	0.00533512	0.0214982	109.396	679.165	0.99224	0.00097468	0.00567153	41.6431	coiled-coil domain containing 28A [Source:HGNC Symbol;Acc:HGNC:21098]
ENSG00000025039.14	RRAGD	protein_coding	9049.3	-1.06469	1.01644e-06	2.52993e-05	146.339	2276.74	3.98252	1.59636e-27	4.80457e-25	68.4394	Ras related GTP binding D [Source:HGNC Symbol;Acc:HGNC:19903]
ENSG00000026297.15	RNASET2	protein_coding	8266.44	-0.972902	8.52564e-08	3.31304e-06	87.175	2298.43	0.767847	0.000470194	0.00306921	23.2333	ribonuclease T2 [Source:HGNC Symbol;Acc:HGNC:21686]
ENSG00000030110.12	BAK1	protein_coding	673.549	-1.23713	3.42857e-07	1.02963e-05	27.54	479.868	-0.696548	0.00887652	0.034429	19.7854	BCL2 antagonist/killer 1 [Source:HGNC Symbol;Acc:HGNC:949]
ENSG00000033050.7	ABCF2	protein_coding	448.463	0.682035	0.00907296	0.0322874	11.4167	2324.02	-1.28647	1.96898e-05	0.000204672	50.1916	ATP binding cassette subfamily F member 2 [Source:HGNC Symbol;Acc:HGNC:71]
ENSG00000034677.11	RNF19A	protein_coding	15193.7	-0.876742	1.53052e-05	0.000222909	195.42	8827.58	0.887618	4.07458e-05	0.000383091	114.253	ring finger protein 19A, RBR E3 ubiquitin protein ligase [Source:HGNC Symbol;Acc:HGNC:13432]
ENSG00000034693.14	PEX3	protein_coding	1605.38	-0.906467	4.54194e-06	8.48477e-05	56.666	1025.74	0.853549	0.000271222	0.00193364	35.0181	peroxisomal biogenesis factor 3 [Source:HGNC Symbol;Acc:HGNC:8858]
ENSG00000037897.16	METTL1	protein_coding	235.644	1.04569	0.000445249	0.00314777	10.8931	430.741	-2.04198	7.05538e-13	4.40972e-11	18.5982	methyltransferase like 1 [Source:HGNC Symbol;Acc:HGNC:7030]
ENSG00000038382.17	TRIO	protein_coding	14050.2	-0.840466	5.5195e-06	9.89641e-05	60.5002	8711.4	0.726021	0.000358502	0.00244113	38.395	trio Rho guanine nucleotide exchange factor [Source:HGNC Symbol;Acc:HGNC:12303]
ENSG00000040531.14	CTNS	protein_coding	258.886	0.756619	0.00426249	0.0181483	8.46641	536.93	-0.742204	0.0131777	0.0475199	13.8265	cystinosin, lysosomal cystine transporter [Source:HGNC Symbol;Acc:HGNC:2518]
ENSG00000042062.11	FAM65C	protein_coding	110.927	-2.27163	1.73279e-11	2.65208e-09	1.97368	186.284	-3.27993	1.76664e-18	2.17363e-16	4.31519	RIPOR family member 3 [Source:HGNC Symbol;Acc:HGNC:16168]
ENSG00000042286.14	AIFM2	protein_coding	2412.51	-0.960323	6.96779e-07	1.84763e-05	35.9342	585.992	0.792396	0.00236944	0.0118642	9.10502	apoptosis inducing factor, mitochondria associated 2 [Source:HGNC Symbol;Acc:HGNC:21411]
ENSG00000043355.10	ZIC2	protein_coding	673.704	-0.928658	6.25908e-05	0.000678314	16.0776	302.513	0.878417	0.00239742	0.0119828	7.80133	Zic family member 2 [Source:HGNC Symbol;Acc:HGNC:12873]
ENSG00000047457.13	CP	protein_coding	200.473	1.56092	8.61374e-07	2.19405e-05	3.9431	93.6217	2.92858	1.09329e-11	5.37387e-10	1.5609	ceruloplasmin [Source:HGNC Symbol;Acc:HGNC:2295]
ENSG00000047597.5	XK	protein_coding	57.6488	1.26664	0.00150587	0.00815326	1.39548	121.372	-1.46347	9.78528e-05	0.000817376	2.52405	X-linked Kx blood group [Source:HGNC Symbol;Acc:HGNC:12811]
ENSG00000048028.11	USP28	protein_coding	2845.06	-0.822415	2.11508e-05	0.000288597	40.5881	2256.05	0.970153	2.82838e-05	0.000278889	32.0477	ubiquitin specific peptidase 28 [Source:HGNC Symbol;Acc:HGNC:12625]
ENSG00000048392.11	RRM2B	protein_coding	6548.34	-0.662472	0.00105165	0.00612659	83.6927	11134.3	0.675856	0.00753114	0.0302405	162.763	ribonucleotide reductase regulatory TP53 inducible subunit M2B [Source:HGNC Symbol;Acc:HGNC:17296]
ENSG00000049167.13	ERCC8	protein_coding	166.877	0.724152	0.0136291	0.0442502	3.76208	456.191	-0.842654	0.00622527	0.0259836	8.80126	ERCC excision repair 8, CSA ubiquitin ligase complex subunit [Source:HGNC Symbol;Acc:HGNC:3439]
ENSG00000049449.8	RCN1	protein_coding	683.74	0.64026	0.00237746	0.0115549	9.59264	396.184	0.793064	0.00510148	0.0222074	4.54544	reticulocalbin 1 [Source:HGNC Symbol;Acc:HGNC:9934]
ENSG00000049883.14	PTCD2	protein_coding	911.355	0.895145	0.000513081	0.0035093	8.05941	1052.32	-0.653149	0.012675	0.0460297	7.07063	pentatricopeptide repeat domain 2 [Source:HGNC Symbol;Acc:HGNC:25734]
ENSG00000052344.15	PRSS8	protein_coding	36304	-1.34801	4.57147e-11	6.08878e-09	1052.95	9370.78	1.30744	5.35753e-08	1.13799e-06	271.628	serine protease 8 [Source:HGNC Symbol;Acc:HGNC:9491]
ENSG00000052802.12	MSMO1	protein_coding	7510.96	-1.66412	1.13852e-13	3.7112e-11	252.77	4764.53	1.13829	7.02354e-05	0.000611489	138.835	methylsterol monooxygenase 1 [Source:HGNC Symbol;Acc:HGNC:10545]
ENSG00000054179.11	ENTPD2	protein_coding	1727.16	-0.713529	0.000433862	0.00308823	47.1431	292.182	0.875491	0.00867723	0.0337816	9.06197	ectonucleoside triphosphate diphosphohydrolase 2 [Source:HGNC Symbol;Acc:HGNC:3364]
ENSG00000054392.12	HHAT	protein_coding	379.624	0.939047	0.000459326	0.00321731	11.4796	325.622	-0.915749	0.00156419	0.00845778	7.77791	hedgehog acyltransferase [Source:HGNC Symbol;Acc:HGNC:18270]
ENSG00000054967.12	RELT	protein_coding	3914.67	-1.88689	2.28485e-12	5.04634e-10	69.6757	1141.26	1.50491	1.10182e-06	1.6587e-05	17.8952	RELT, TNF receptor [Source:HGNC Symbol;Acc:HGNC:13764]
ENSG00000055147.17	FAM114A2	protein_coding	718.569	0.605479	0.007971	0.0292796	10.6258	1155.94	-0.588838	0.00960421	0.0367039	14.1351	family with sequence similarity 114 member A2 [Source:HGNC Symbol;Acc:HGNC:1333]
ENSG00000059378.12	PARP12	protein_coding	351.083	0.8903	0.00525565	0.0212565	5.95959	162.436	-1.75989	3.80994e-07	6.46996e-06	2.91412	poly(ADP-ribose) polymerase family member 12 [Source:HGNC Symbol;Acc:HGNC:21919]
ENSG00000059728.10	MXD1	protein_coding	16971.8	-2.18278	1.33448e-17	1.1642e-14	302.377	4713.05	1.38675	1.9418e-06	2.71145e-05	76.8353	MAX dimerization protein 1 [Source:HGNC Symbol;Acc:HGNC:6761]
ENSG00000059769.19	DNAJC25	protein_coding	1335.63	-0.960301	0.000456701	0.00320278	48.5421	782.153	0.931362	0.00022577	0.00165918	23.5042	DnaJ heat shock protein family (Hsp40) member C25 [Source:HGNC Symbol;Acc:HGNC:34187]
ENSG00000060069.16	CTDP1	protein_coding	1253.54	-0.908686	1.34722e-05	0.000200394	12.8592	1004.21	0.631422	0.00855076	0.0333823	9.72856	CTD phosphatase subunit 1 [Source:HGNC Symbol;Acc:HGNC:2498]
ENSG00000063127.15	SLC6A16	protein_coding	217.918	0.971578	0.00265561	0.0126219	6.88335	122.352	1.07146	0.00579477	0.0245481	3.58744	solute carrier family 6 member 16 [Source:HGNC Symbol;Acc:HGNC:13622]
ENSG00000064205.10	WISP2	protein_coding	33056.5	-1.32118	2.03082e-12	4.57645e-10	545.149	6685.04	2.14821	2.97387e-12	1.65749e-10	148.64	WNT1 inducible signaling pathway protein 2 [Source:HGNC Symbol;Acc:HGNC:12770]
ENSG00000064703.11	DDX20	protein_coding	645.545	-0.601948	0.00911743	0.0324126	7.73211	1646.35	-0.928819	0.000219677	0.00162171	24.9197	DEAD-box helicase 20 [Source:HGNC Symbol;Acc:HGNC:2743]
ENSG00000064787.12	BCAS1	protein_coding	19468.9	0.988136	2.50534e-05	0.000328423	268.124	12162.4	2.66409	2.45514e-25	5.71784e-23	172.222	breast carcinoma amplified sequence 1 [Source:HGNC Symbol;Acc:HGNC:974]
ENSG00000065457.10	ADAT1	protein_coding	431.954	0.76966	0.0072647	0.0271532	11.32	2453.67	-1.72424	4.02333e-07	6.7677e-06	59.948	adenosine deaminase, tRNA specific 1 [Source:HGNC Symbol;Acc:HGNC:228]
ENSG00000065526.10	SPEN	protein_coding	11103.7	-0.786666	1.34288e-05	0.00019992	64.7777	6274.65	0.672397	0.00114888	0.00651279	37.633	spen family transcriptional repressor [Source:HGNC Symbol;Acc:HGNC:17575]
ENSG00000065665.20	SEC61A2	protein_coding	332.93	-0.859907	0.00275648	0.0130079	7.40008	337.284	-0.730553	0.00805876	0.0318299	7.33508	Sec61 translocon alpha 2 subunit [Source:HGNC Symbol;Acc:HGNC:17702]
ENSG00000066248.14	NGEF	protein_coding	1258.53	-0.694121	0.000823959	0.00508901	18.972	481.628	1.47356	0.000359281	0.00244388	12.4916	neuronal guanine nucleotide exchange factor [Source:HGNC Symbol;Acc:HGNC:7807]
ENSG00000066468.20	FGFR2	protein_coding	546.585	1.02828	4.85886e-05	0.000554463	9.20044	691.221	-0.79706	0.00318187	0.0152044	8.52345	fibroblast growth factor receptor 2 [Source:HGNC Symbol;Acc:HGNC:3689]
ENSG00000066583.11	ISOC1	protein_coding	4040.1	-0.802648	6.47247e-05	0.000697971	156.431	10359.7	-1.26098	6.70753e-08	1.37691e-06	517.991	isochorismatase domain containing 1 [Source:HGNC Symbol;Acc:HGNC:24254]
ENSG00000066697.14	MSANTD3	protein_coding	2812.42	-0.781186	0.000219006	0.00181186	77.0419	1953.54	1.56499	6.38326e-10	2.20629e-08	68.7917	Myb/SANT DNA binding domain containing 3 [Source:HGNC Symbol;Acc:HGNC:23370]
ENSG00000066926.10	FECH	protein_coding	709.491	0.833465	7.18573e-05	0.000758972	16.7776	922.228	-0.624344	0.0103273	0.039014	17.6628	ferrochelatase [Source:HGNC Symbol;Acc:HGNC:3647]
ENSG00000067225.17	PKM	protein_coding	173214	-0.598807	0.00271762	0.0128606	1454.32	125259	1.95242	4.68627e-14	3.43361e-12	1685.06	pyruvate kinase M1/2 [Source:HGNC Symbol;Acc:HGNC:9021]
ENSG00000067533.5	RRP15	protein_coding	916.928	0.730352	0.00270782	0.0128247	12.5151	1519.95	-1.3806	1.12719e-08	2.81626e-07	18.21	ribosomal RNA processing 15 homolog [Source:HGNC Symbol;Acc:HGNC:24255]
ENSG00000067992.12	PDK3	protein_coding	3736.72	-1.00963	7.18524e-08	2.88866e-06	111.875	3494.49	0.941444	3.31229e-05	0.00032015	114.562	pyruvate dehydrogenase kinase 3 [Source:HGNC Symbol;Acc:HGNC:8811]
ENSG00000068028.17	RASSF1	protein_coding	5090.1	-1.57879	2.37953e-10	2.44992e-08	140.994	1209.77	1.30973	8.59161e-06	9.88111e-05	33.1704	Ras association domain family member 1 [Source:HGNC Symbol;Acc:HGNC:9882]
ENSG00000068079.7	IFI35	protein_coding	192.581	1.14925	5.88704e-05	0.000647649	12.1142	206.482	-1.93639	1.76306e-09	5.43161e-08	11.5316	interferon induced protein 35 [Source:HGNC Symbol;Acc:HGNC:5399]
ENSG00000068323.16	TFE3	protein_coding	5350.4	-0.858275	0.000101906	0.00100455	100.944	2343.72	0.991423	7.08969e-06	8.33507e-05	45.4497	transcription factor binding to IGHM enhancer 3 [Source:HGNC Symbol;Acc:HGNC:11752]
ENSG00000068971.13	PPP2R5B	protein_coding	2468.31	-1.36606	1.90866e-11	2.85615e-09	60.8971	858.752	1.83052	1.90543e-13	1.28096e-11	24.3213	protein phosphatase 2 regulatory subunit B'beta [Source:HGNC Symbol;Acc:HGNC:9310]
ENSG00000068976.13	PYGM	protein_coding	89.4008	1.72452	1.19084e-05	0.000182369	2.61074	138.941	1.49827	4.8033e-05	0.000442823	3.04405	glycogen phosphorylase, muscle associated [Source:HGNC Symbol;Acc:HGNC:9726]
ENSG00000069535.13	MAOB	protein_coding	44.8976	1.50338	0.000547546	0.00369006	2.48779	518.869	-2.49994	2.15249e-10	8.28922e-09	26.4632	monoamine oxidase B [Source:HGNC Symbol;Acc:HGNC:6834]
ENSG00000069998.12	CECR5	protein_coding	5966.19	-0.878126	3.1263e-05	0.000390463	95.9363	2290.63	0.651597	0.0047416	0.0209249	34.7461	haloacid dehalogenase like hydrolase domain containing 5 [Source:HGNC Symbol;Acc:HGNC:1843]
ENSG00000070423.17	RNF126	protein_coding	2973.15	-1.49856	5.66967e-09	3.6236e-07	86.4818	1295.19	0.795159	0.000368853	0.0025003	29.7155	ring finger protein 126 [Source:HGNC Symbol;Acc:HGNC:21151]
ENSG00000070495.14	JMJD6	protein_coding	4732.24	-1.37406	1.03425e-09	8.63428e-08	72.5243	2549.33	1.65147	5.22291e-12	2.74666e-10	38.693	jumonji domain containing 6, arginine demethylase and lysine hydroxylase [Source:HGNC Symbol;Acc:HGNC:19355]
ENSG00000071246.10	VASH1	protein_coding	124.318	1.65337	1.18805e-05	0.000182314	2.83801	333.609	-1.67935	7.05772e-06	8.30248e-05	5.30835	vasohibin 1 [Source:HGNC Symbol;Acc:HGNC:19964]
ENSG00000071462.11	WBSCR22	protein_coding	4150.49	-1.05936	1.9012e-06	4.20433e-05	44.5898	2321.24	-0.601879	0.00554189	0.023713	23.106	BUD23, rRNA methyltransferase and ribosome maturation factor [Source:HGNC Symbol;Acc:HGNC:16405]
ENSG00000071794.15	HLTF	protein_coding	3995.16	0.760611	0.0001166	0.00111111	69.0427	7257.67	-0.773814	0.00380184	0.0175455	98.9444	helicase like transcription factor [Source:HGNC Symbol;Acc:HGNC:11099]
ENSG00000072042.12	RDH11	protein_coding	4789.94	-1.62163	3.74466e-12	7.68668e-10	85.6482	4975.49	0.782321	0.00121978	0.00684918	78.5944	retinol dehydrogenase 11 [Source:HGNC Symbol;Acc:HGNC:17964]
ENSG00000072682.18	P4HA2	protein_coding	10424.5	-0.971873	1.91695e-06	4.22844e-05	96.1908	4927.38	2.84891	1.72779e-27	5.12133e-25	64.0775	prolyl 4-hydroxylase subunit alpha 2 [Source:HGNC Symbol;Acc:HGNC:8547]
ENSG00000072858.10	SIDT1	protein_coding	1203.75	0.772454	0.000577786	0.00385394	16.1792	1969.19	-1.67698	3.12438e-13	2.04422e-11	26.5062	SID1 transmembrane family member 1 [Source:HGNC Symbol;Acc:HGNC:25967]
ENSG00000073910.19	FRY	protein_coding	612.156	-0.663657	0.00788711	0.0290622	3.04587	194.287	1.75501	2.07706e-07	3.77284e-06	1.20926	FRY microtubule binding protein [Source:HGNC Symbol;Acc:HGNC:20367]
ENSG00000074410.13	CA12	protein_coding	10586.1	-1.2179	3.47178e-10	3.46146e-08	118.333	8308.55	-0.741095	0.000624098	0.00389491	100.793	carbonic anhydrase 12 [Source:HGNC Symbol;Acc:HGNC:1371]
ENSG00000074416.13	MGLL	protein_coding	3624.63	-1.36757	3.22472e-13	9.22375e-11	35.0881	2087.98	1.16264	0.000161878	0.00125103	20.8571	monoglyceride lipase [Source:HGNC Symbol;Acc:HGNC:17038]
ENSG00000074527.11	NTN4	protein_coding	1971.06	1.64075	3.76234e-13	1.05879e-10	61.1567	604.843	1.75328	4.29428e-10	1.55285e-08	14.1614	netrin 4 [Source:HGNC Symbol;Acc:HGNC:13658]
ENSG00000074621.13	SLC24A1	protein_coding	1538.49	1.15767	3.22183e-07	9.87954e-06	19.3858	1212.15	-0.59074	0.00892654	0.0345939	10.6821	solute carrier family 24 member 1 [Source:HGNC Symbol;Acc:HGNC:10975]
ENSG00000074695.5	LMAN1	protein_coding	17787.7	-0.860383	1.58956e-05	0.000229781	197.946	10532.3	1.17684	5.59998e-07	9.11417e-06	135.515	lectin, mannose binding 1 [Source:HGNC Symbol;Acc:HGNC:6631]
ENSG00000075131.9	TIPIN	protein_coding	244.6	0.893516	0.00070396	0.00448601	10.0732	673.758	-1.43001	7.46005e-08	1.49991e-06	26.1584	TIMELESS interacting protein [Source:HGNC Symbol;Acc:HGNC:30750]
ENSG00000075239.13	ACAT1	protein_coding	523.309	0.763929	0.000642985	0.00418363	9.38031	764.645	-0.842646	0.00090515	0.00534484	12.1215	acetyl-CoA acetyltransferase 1 [Source:HGNC Symbol;Acc:HGNC:93]
ENSG00000075407.17	ZNF37A	protein_coding	1409.13	1.64745	2.28282e-09	1.66656e-07	19.8037	3232.24	0.769756	0.00112801	0.00641489	30.4919	zinc finger protein 37A [Source:HGNC Symbol;Acc:HGNC:13102]
ENSG00000075420.12	FNDC3B	protein_coding	4846.09	-0.746724	4.94687e-05	0.000562666	28.4753	3192.49	1.17852	8.58498e-08	1.7016e-06	19.91	fibronectin type III domain containing 3B [Source:HGNC Symbol;Acc:HGNC:24670]
ENSG00000075702.16	WDR62	protein_coding	721.851	-1.30317	2.18813e-09	1.60414e-07	6.07315	1520.96	-1.15819	1.4017e-05	0.000152552	15.7634	WD repeat domain 62 [Source:HGNC Symbol;Acc:HGNC:24502]
ENSG00000076248.10	UNG	protein_coding	1788.91	0.740304	9.4396e-05	0.000943851	72.4788	3163.33	-1.5783	3.67308e-12	2.00157e-10	129.447	uracil DNA glycosylase [Source:HGNC Symbol;Acc:HGNC:12572]
ENSG00000076864.19	RAP1GAP	protein_coding	6538.11	-0.727775	0.00174474	0.00915557	88.829	1396.95	1.89986	2.40561e-09	7.17392e-08	28.742	RAP1 GTPase activating protein [Source:HGNC Symbol;Acc:HGNC:9858]
ENSG00000077150.17	NFKB2	protein_coding	5553.06	-0.998316	1.76645e-06	3.97177e-05	99.8215	1640.39	1.10067	3.15513e-05	0.000306626	32.5886	nuclear factor kappa B subunit 2 [Source:HGNC Symbol;Acc:HGNC:7795]
ENSG00000077152.9	UBE2T	protein_coding	2683.18	-1.2752	9.21471e-11	1.11652e-08	203.665	2840.01	-1.11845	1.27303e-06	1.8725e-05	238.977	ubiquitin conjugating enzyme E2 T [Source:HGNC Symbol;Acc:HGNC:25009]
ENSG00000078081.7	LAMP3	protein_coding	37.6819	1.39775	0.00202034	0.0102078	1.2878	54.9428	-1.34041	0.0124868	0.0454897	2.00485	lysosomal associated membrane protein 3 [Source:HGNC Symbol;Acc:HGNC:14582]
ENSG00000078114.18	NEBL	protein_coding	11117.1	0.59398	0.00626791	0.0243244	81.7364	13427.8	1.10758	2.97076e-07	5.1983e-06	83.5521	nebulette [Source:HGNC Symbol;Acc:HGNC:16932]
ENSG00000078900.14	TP73	protein_coding	644.05	-0.6232	0.00350989	0.0156585	7.39449	767.97	-0.83097	0.00373654	0.0173131	10.6733	tumor protein p73 [Source:HGNC Symbol;Acc:HGNC:12003]
ENSG00000079393.20	DUSP13	protein_coding	83.3107	-1.6916	5.0288e-06	9.17808e-05	3.64331	57.8383	2.88541	1.60775e-08	3.86869e-07	3.15426	dual specificity phosphatase 13 [Source:HGNC Symbol;Acc:HGNC:19681]
ENSG00000079616.12	KIF22	protein_coding	9129.59	-0.914653	7.70678e-07	2.00698e-05	162.535	10896.3	-0.815193	8.35379e-05	0.000710236	211.067	kinesin family member 22 [Source:HGNC Symbol;Acc:HGNC:6391]
ENSG00000079974.17	RABL2B	protein_coding	254.972	1.03922	0.000522301	0.00356259	4.92827	258.976	-0.973776	0.00376189	0.0174027	4.05244	RAB, member of RAS oncogene family like 2B [Source:HGNC Symbol;Acc:HGNC:9800]
ENSG00000080031.9	PTPRH	protein_coding	705.576	0.641397	0.00593565	0.0233255	15.9713	105.749	2.45289	1.38703e-08	3.37915e-07	3.38373	protein tyrosine phosphatase, receptor type H [Source:HGNC Symbol;Acc:HGNC:9672]
ENSG00000080822.16	CLDND1	protein_coding	5347.31	-0.885176	9.22179e-06	0.000148708	78.3542	3392.17	0.914587	0.00027689	0.00196845	55.2766	claudin domain containing 1 [Source:HGNC Symbol;Acc:HGNC:1322]
ENSG00000080823.21	MOK	protein_coding	454.995	0.711266	0.00216207	0.0107414	4.53228	481.547	-1.15863	0.000222443	0.00163719	4.03644	MOK protein kinase [Source:HGNC Symbol;Acc:HGNC:9833]
ENSG00000081320.10	STK17B	protein_coding	4215.54	-0.823564	2.46767e-05	0.000325441	47.3487	3244.4	1.19896	2.22465e-08	5.16261e-07	45.7643	serine/threonine kinase 17b [Source:HGNC Symbol;Acc:HGNC:11396]
ENSG00000081692.12	JMJD4	protein_coding	529.284	0.967669	7.18663e-05	0.000758972	13.2165	967.053	-0.613815	0.0103931	0.0391981	18.7973	jumonji domain containing 4 [Source:HGNC Symbol;Acc:HGNC:25724]
ENSG00000081853.14	PCDHGA2	protein_coding	550.108	0.592416	0.00663911	0.0253588	7.85478	531.603	-0.859979	0.000915453	0.00539103	6.64892	protocadherin gamma subfamily A, 2 [Source:HGNC Symbol;Acc:HGNC:8700]
ENSG00000082482.13	KCNK2	protein_coding	536.147	0.932704	0.000301187	0.00231809	16.109	722.258	-0.969203	0.0013997	0.00769727	18.4612	potassium two pore domain channel subfamily K member 2 [Source:HGNC Symbol;Acc:HGNC:6277]
ENSG00000082684.14	SEMA5B	protein_coding	2492.15	1.5767	1.34152e-09	1.08365e-07	51.897	105.924	5.43127	6.62404e-15	5.42201e-13	2.2404	semaphorin 5B [Source:HGNC Symbol;Acc:HGNC:10737]
ENSG00000083290.19	ULK2	protein_coding	1026.53	0.655533	0.00443415	0.0187058	10.7759	2000.51	-0.62666	0.00704711	0.0287533	17.2263	unc-51 like autophagy activating kinase 2 [Source:HGNC Symbol;Acc:HGNC:13480]
ENSG00000083457.11	ITGAE	protein_coding	501.346	-0.72386	0.00200064	0.0101357	5.46648	527.64	-0.67924	0.0101876	0.0385867	6.91236	integrin subunit alpha E [Source:HGNC Symbol;Acc:HGNC:6147]
ENSG00000084731.13	KIF3C	protein_coding	1158.53	0.797992	5.84878e-05	0.000644252	18.2558	1102.87	1.29279	0.000131204	0.00104979	20.8985	kinesin family member 3C [Source:HGNC Symbol;Acc:HGNC:6321]
ENSG00000084774.13	CAD	protein_coding	815.51	1.14145	1.63283e-06	3.70958e-05	11.1966	2332.12	-2.18313	9.43273e-13	5.66051e-11	31.1885	carbamoyl-phosphate synthetase 2, aspartate transcarbamylase, and dihydroorotase [Source:HGNC Symbol;Acc:HGNC:1424]
ENSG00000085982.13	USP40	protein_coding	2917	0.739162	0.000257204	0.00205669	33.7358	2542.53	-0.80742	0.000185143	0.00140168	22.5973	ubiquitin specific peptidase 40 [Source:HGNC Symbol;Acc:HGNC:20069]
ENSG00000085998.13	POMGNT1	protein_coding	1421.37	0.659151	0.000681372	0.00437543	23.5284	1767.8	-0.928621	8.1989e-05	0.000698775	26.2415	protein O-linked mannose N-acetylglucosaminyltransferase 1 (beta 1,2-) [Source:HGNC Symbol;Acc:HGNC:19139]
ENSG00000085999.11	RAD54L	protein_coding	763.834	-0.69518	0.00142638	0.00784598	16.7849	726.316	-1.02453	9.06397e-05	0.000763646	20.7608	RAD54 like [Source:HGNC Symbol;Acc:HGNC:9826]
ENSG00000087074.7	PPP1R15A	protein_coding	10695.6	-0.700663	0.0047408	0.0195874	287.788	3494.6	1.40985	9.23758e-06	0.000105435	124.274	protein phosphatase 1 regulatory subunit 15A [Source:HGNC Symbol;Acc:HGNC:14375]
ENSG00000088727.12	KIF9	protein_coding	124.985	0.946627	0.00268768	0.0127431	2.4256	127.835	-1.23362	0.000685699	0.00421209	2.26955	kinesin family member 9 [Source:HGNC Symbol;Acc:HGNC:16666]
ENSG00000089723.9	OTUB2	protein_coding	463.574	0.62302	0.00617864	0.0240529	10.764	516.544	0.727323	0.013526	0.0484965	9.74795	OTU deubiquitinase, ubiquitin aldehyde binding 2 [Source:HGNC Symbol;Acc:HGNC:20351]
ENSG00000089775.11	ZBTB25	protein_coding	8998.8	-1.02161	4.84204e-06	8.95622e-05	61.9063	4706.14	1.47416	4.31687e-09	1.19619e-07	37.3157	zinc finger and BTB domain containing 25 [Source:HGNC Symbol;Acc:HGNC:13112]
ENSG00000090612.20	ZNF268	protein_coding	902.212	1.43001	5.48921e-07	1.53241e-05	8.33673	2459.24	-0.755464	0.000772305	0.00466459	14.7297	zinc finger protein 268 [Source:HGNC Symbol;Acc:HGNC:13061]
ENSG00000091136.13	LAMB1	protein_coding	269.21	2.18734	1.92483e-15	1.01771e-12	4.88192	383.958	-0.799824	0.00674896	0.0277491	4.53499	laminin subunit beta 1 [Source:HGNC Symbol;Acc:HGNC:6486]
ENSG00000091409.14	ITGA6	protein_coding	915.263	1.10497	8.75772e-07	2.221e-05	16.4357	1008.4	-0.832278	0.00640392	0.0265874	13.0859	integrin subunit alpha 6 [Source:HGNC Symbol;Acc:HGNC:6142]
ENSG00000091542.8	ALKBH5	protein_coding	10996.9	-0.730133	9.7307e-05	0.000967415	252.832	9788.03	0.845626	6.41786e-05	0.000565573	233.96	alkB homolog 5, RNA demethylase [Source:HGNC Symbol;Acc:HGNC:25996]
ENSG00000091651.8	ORC6	protein_coding	605.828	-0.818641	0.000204283	0.00171115	10.4283	758.9	-0.748466	0.00233297	0.0117236	15.4236	origin recognition complex subunit 6 [Source:HGNC Symbol;Acc:HGNC:17151]
ENSG00000091947.9	TMEM101	protein_coding	3547.11	-0.750106	0.000547411	0.00369006	90.5567	1883.03	0.635204	0.00855002	0.0333823	47.5514	transmembrane protein 101 [Source:HGNC Symbol;Acc:HGNC:28653]
ENSG00000092621.11	PHGDH	protein_coding	888.485	0.718569	0.000381768	0.00278125	16.1011	2537.05	-1.74544	0.0061468	0.0257384	86.1677	phosphoglycerate dehydrogenase [Source:HGNC Symbol;Acc:HGNC:8923]
ENSG00000092964.16	DPYSL2	protein_coding	3534.11	-0.597284	0.0017333	0.00910924	41.8667	7682.76	1.37814	4.40235e-08	9.5269e-07	94.876	dihydropyrimidinase like 2 [Source:HGNC Symbol;Acc:HGNC:3014]
ENSG00000094755.16	GABRP	protein_coding	130.042	3.24062	4.74556e-19	5.91433e-16	4.13473	263.398	1.33005	0.000447588	0.00293929	7.06388	gamma-aminobutyric acid type A receptor pi subunit [Source:HGNC Symbol;Acc:HGNC:4089]
ENSG00000095059.15	DHPS	protein_coding	12797.8	-0.855501	6.97439e-05	0.000741103	332.723	7743.11	0.702304	0.013369	0.0480681	220.406	deoxyhypusine synthase [Source:HGNC Symbol;Acc:HGNC:2869]
ENSG00000095203.14	EPB41L4B	protein_coding	6699.48	-1.10384	6.46939e-08	2.64351e-06	66.9917	4167.52	1.14546	1.5618e-06	2.25155e-05	46.1444	erythrocyte membrane protein band 4.1 like 4B [Source:HGNC Symbol;Acc:HGNC:19818]
ENSG00000095383.19	TBC1D2	protein_coding	4388.91	-0.660563	0.00038	0.00277416	95.2474	2301.72	1.0358	3.61816e-06	4.66592e-05	50.8203	TBC1 domain family member 2 [Source:HGNC Symbol;Acc:HGNC:18026]
ENSG00000095564.13	BTAF1	protein_coding	7855.11	-0.682774	0.000472742	0.00329015	74.2089	7509.06	0.764712	0.00175214	0.0093043	81.1982	B-TFIID TATA-box binding protein associated factor 1 [Source:HGNC Symbol;Acc:HGNC:17307]
ENSG00000096006.11	CRISP3	protein_coding	303.132	0.719639	0.00418243	0.0178598	14.2258	262.534	-1.15023	0.000373905	0.00253017	12.6314	cysteine rich secretory protein 3 [Source:HGNC Symbol;Acc:HGNC:16904]
ENSG00000096060.14	FKBP5	protein_coding	422.774	0.65209	0.00460991	0.0192244	11.3826	1212.48	-1.21388	2.30501e-07	4.15602e-06	30.8525	FK506 binding protein 5 [Source:HGNC Symbol;Acc:HGNC:3721]
ENSG00000096092.5	TMEM14A	protein_coding	1170.72	-0.624193	0.00182623	0.00944958	84.2196	848.635	-1.01228	0.000119408	0.000970893	84.6313	transmembrane protein 14A [Source:HGNC Symbol;Acc:HGNC:21076]
ENSG00000099194.5	SCD	protein_coding	322702	-1.5825	1.48785e-12	3.50812e-10	5637.02	194709	2.31679	8.05595e-13	4.94039e-11	4284.3	stearoyl-CoA desaturase [Source:HGNC Symbol;Acc:HGNC:10571]
ENSG00000099849.14	RASSF7	protein_coding	4853.01	-0.626828	0.0032731	0.0148297	145.546	1975.69	1.02689	4.86589e-06	6.04774e-05	62.8231	Ras association domain family member 7 [Source:HGNC Symbol;Acc:HGNC:1166]
ENSG00000099860.8	GADD45B	protein_coding	8371.9	-1.3895	5.32013e-07	1.48998e-05	414.931	3766.95	0.855182	0.00194143	0.0101065	147.878	growth arrest and DNA damage inducible beta [Source:HGNC Symbol;Acc:HGNC:4096]
ENSG00000099917.17	MED15	protein_coding	5332.13	-0.640188	0.00117684	0.0067235	35.8122	1790.39	0.702824	0.00165432	0.00886663	12.567	mediator complex subunit 15 [Source:HGNC Symbol;Acc:HGNC:14248]
ENSG00000099942.12	CRKL	protein_coding	12631.1	-1.16262	4.62445e-10	4.29188e-08	188.297	7652.36	0.660331	0.00183603	0.00966221	103.187	CRK like proto-oncogene, adaptor protein [Source:HGNC Symbol;Acc:HGNC:2363]
ENSG00000099949.18	LZTR1	protein_coding	370.852	0.937854	0.000473819	0.0032937	6.02841	787.063	-1.15392	0.000212879	0.00157808	10.5689	leucine zipper like transcription regulator 1 [Source:HGNC Symbol;Acc:HGNC:6742]
ENSG00000099977.13	DDT	protein_coding	3592.36	-0.903809	2.31654e-05	0.000309724	163.824	1270.25	1.05385	1.26949e-05	0.000139995	60.4146	D-dopachrome tautomerase [Source:HGNC Symbol;Acc:HGNC:2732]
ENSG00000100028.11	SNRPD3	protein_coding	3718.8	-0.649936	0.00461775	0.0192522	114.75	4208.15	-0.782128	0.00026625	0.00190305	144.303	small nuclear ribonucleoprotein D3 polypeptide [Source:HGNC Symbol;Acc:HGNC:11160]
ENSG00000100060.17	MFNG	protein_coding	32.0733	1.20705	0.0122691	0.0407058	1.57724	22.7993	1.65519	0.00893417	0.0346166	1.17612	MFNG O-fucosylpeptide 3-beta-N-acetylglucosaminyltransferase [Source:HGNC Symbol;Acc:HGNC:7038]
ENSG00000100228.12	RAB36	protein_coding	196.66	1.40328	1.76781e-05	0.000249755	6.75719	206.752	-2.07909	5.79303e-10	2.02735e-08	6.16299	RAB36, member RAS oncogene family [Source:HGNC Symbol;Acc:HGNC:9775]
ENSG00000100258.17	LMF2	protein_coding	711.009	0.628123	0.002857	0.0133608	24.0973	810.627	-0.983016	0.000152223	0.0011926	24.611	lipase maturation factor 2 [Source:HGNC Symbol;Acc:HGNC:25096]
ENSG00000100292.16	HMOX1	protein_coding	3735.03	1.03113	4.72954e-08	2.04767e-06	165.899	1842.52	3.29782	1.45204e-32	6.04388e-30	94.9625	heme oxygenase 1 [Source:HGNC Symbol;Acc:HGNC:5013]
ENSG00000100302.6	RASD2	protein_coding	118.851	0.968783	0.00296132	0.013733	3.88173	70.4268	3.86411	7.34872e-13	4.56391e-11	2.62923	RASD family member 2 [Source:HGNC Symbol;Acc:HGNC:18229]
ENSG00000100350.14	FOXRED2	protein_coding	943.427	0.765373	0.000880509	0.00532659	17.9896	937.601	-0.825496	0.000939618	0.00550682	14.9823	FAD dependent oxidoreductase domain containing 2 [Source:HGNC Symbol;Acc:HGNC:26264]
ENSG00000100360.14	IFT27	protein_coding	527.14	1.30721	6.95799e-08	2.80377e-06	8.07308	746.17	-0.744059	0.00542827	0.023334	8.90586	intraflagellar transport 27 [Source:HGNC Symbol;Acc:HGNC:18626]
ENSG00000100413.16	POLR3H	protein_coding	904.01	1.46676	1.86615e-08	9.4653e-07	18.2425	1809.22	-0.6639	0.00915816	0.0352957	22.3093	RNA polymerase III subunit H [Source:HGNC Symbol;Acc:HGNC:30349]
ENSG00000100416.12	TRMU	protein_coding	1935.35	-0.719991	0.000317091	0.00242233	16.5058	1179.14	0.763675	0.00131369	0.00730949	10.6617	tRNA 5-methylaminomethyl-2-thiouridylate methyltransferase [Source:HGNC Symbol;Acc:HGNC:25481]
ENSG00000100504.16	PYGL	protein_coding	13094.5	-0.672705	0.000378735	0.00276608	205.683	2730.93	2.30872	2.82497e-10	1.06075e-08	66.4141	glycogen phosphorylase L [Source:HGNC Symbol;Acc:HGNC:9725]
ENSG00000100558.8	PLEK2	protein_coding	187.224	0.90929	0.00243587	0.0117825	13.1882	121.753	-1.55483	6.26116e-05	0.000555245	8.94177	pleckstrin 2 [Source:HGNC Symbol;Acc:HGNC:19238]
ENSG00000100583.4	SAMD15	protein_coding	91.9555	2.0104	1.07084e-06	2.65021e-05	6.47062	528.394	-3.11726	6.11698e-14	4.43337e-12	28.4398	sterile alpha motif domain containing 15 [Source:HGNC Symbol;Acc:HGNC:18631]
ENSG00000100591.7	AHSA1	protein_coding	2273.73	0.620593	0.000835489	0.00514182	74.9405	5370.51	-1.23996	1.40777e-05	0.000153001	206.912	activator of HSP90 ATPase activity 1 [Source:HGNC Symbol;Acc:HGNC:1189]
ENSG00000100644.16	HIF1A	protein_coding	13704	-1.26947	1.22025e-09	9.99578e-08	229.421	16814.7	-0.629705	0.00303622	0.0146155	272.273	hypoxia inducible factor 1 subunit alpha [Source:HGNC Symbol;Acc:HGNC:4910]
ENSG00000100811.10	YY1	protein_coding	13330.7	-0.694143	0.000581261	0.00386946	111.681	12059.4	0.768471	0.000322381	0.00223643	105.141	YY1 transcription factor [Source:HGNC Symbol;Acc:HGNC:12856]
ENSG00000100906.10	NFKBIA	protein_coding	14375.6	-0.596149	0.0105786	0.0363125	474.518	13158.6	1.15502	0.000396663	0.00265933	676.79	NFKB inhibitor alpha [Source:HGNC Symbol;Acc:HGNC:7797]
ENSG00000100968.13	NFATC4	protein_coding	364.399	0.855341	0.000451416	0.00317593	4.84783	654.014	1.13436	1.12428e-05	0.000125682	6.50523	nuclear factor of activated T cells 4 [Source:HGNC Symbol;Acc:HGNC:7778]
ENSG00000101052.12	IFT52	protein_coding	577.014	1.04434	1.69925e-06	3.83089e-05	25.7214	692.98	-0.7225	0.00392048	0.0179785	24.0771	intraflagellar transport 52 [Source:HGNC Symbol;Acc:HGNC:15901]
ENSG00000101057.15	MYBL2	protein_coding	2511.89	-0.766978	0.000219929	0.00181606	70.5412	3518.02	-1.39342	4.71231e-07	7.80584e-06	149.128	MYB proto-oncogene like 2 [Source:HGNC Symbol;Acc:HGNC:7548]
ENSG00000101084.16	C20orf24	protein_coding	299.299	-0.623184	0.0144246	0.0461968	13.8208	408.707	-0.82581	0.00379341	0.017519	25.9839	RAB5 interacting factor [Source:HGNC Symbol;Acc:HGNC:15870]
ENSG00000101187.15	SLCO4A1	protein_coding	7405.54	-1.28506	2.11814e-10	2.22634e-08	157.624	6069.09	2.48181	5.85058e-32	2.2891e-29	170.76	solute carrier organic anion transporter family member 4A1 [Source:HGNC Symbol;Acc:HGNC:10953]
ENSG00000101189.6	MRGBP	protein_coding	12228.6	-1.09937	1.87184e-06	4.16581e-05	388.599	8714.23	1.33332	1.31461e-09	4.18175e-08	272.848	MRG domain binding protein [Source:HGNC Symbol;Acc:HGNC:15866]
ENSG00000101266.16	CSNK2A1	protein_coding	10456.5	-0.77307	0.00011465	0.00109671	126.067	7365.38	0.793799	0.000431867	0.00285851	95.1418	casein kinase 2 alpha 1 [Source:HGNC Symbol;Acc:HGNC:2457]
ENSG00000101347.8	SAMHD1	protein_coding	217.731	1.20015	6.93218e-05	0.000737966	4.84148	833.154	-1.97098	1.79753e-06	2.53351e-05	19.5432	SAM and HD domain containing deoxynucleoside triphosphate triphosphohydrolase 1 [Source:HGNC Symbol;Acc:HGNC:15925]
ENSG00000101384.11	JAG1	protein_coding	4703.45	-1.5721	9.74023e-12	1.66615e-09	51.6785	2642.39	0.794522	0.00279361	0.0136288	24.1557	jagged 1 [Source:HGNC Symbol;Acc:HGNC:6188]
ENSG00000101400.5	SNTA1	protein_coding	1346.75	-0.704942	0.00029674	0.00229398	44.6192	430.261	3.07513	3.49095e-28	1.06708e-25	19.5072	syntrophin alpha 1 [Source:HGNC Symbol;Acc:HGNC:11167]
ENSG00000101665.8	SMAD7	protein_coding	1164.65	-0.848617	0.00012782	0.00120033	24.6504	1009.19	0.637517	0.00880154	0.0341907	23.2242	SMAD family member 7 [Source:HGNC Symbol;Acc:HGNC:6773]
ENSG00000101782.14	RIOK3	protein_coding	10305	-1.18216	1.4335e-08	7.82882e-07	163.828	4708.02	1.05316	4.17826e-05	0.000391472	73.9497	RIO kinase 3 [Source:HGNC Symbol;Acc:HGNC:11451]
ENSG00000102078.15	SLC25A14	protein_coding	744.245	0.654594	0.00289966	0.0135168	27.3917	808.247	-0.674909	0.00498359	0.0217912	22.4094	solute carrier family 25 member 14 [Source:HGNC Symbol;Acc:HGNC:10984]
ENSG00000102119.10	EMD	protein_coding	8607.19	-0.896361	5.9184e-05	0.000649461	351.706	2292.62	0.730317	0.00257259	0.0126962	87.9575	emerin [Source:HGNC Symbol;Acc:HGNC:3331]
ENSG00000102144.13	PGK1	protein_coding	240009	-0.736883	7.51225e-05	0.000786285	3165.77	104215	3.08236	4.29406e-36	2.15397e-33	2170.41	phosphoglycerate kinase 1 [Source:HGNC Symbol;Acc:HGNC:8896]
ENSG00000102226.9	USP11	protein_coding	3224.37	0.950312	1.23615e-06	2.98318e-05	69.7118	2829.01	-0.728851	0.00357616	0.0167449	46.5702	ubiquitin specific peptidase 11 [Source:HGNC Symbol;Acc:HGNC:12609]
ENSG00000102554.13	KLF5	protein_coding	3192.89	-0.726248	0.000600356	0.00396481	61.5572	2909.28	0.912074	0.000181412	0.00137824	61.3471	Kruppel like factor 5 [Source:HGNC Symbol;Acc:HGNC:6349]
ENSG00000102606.17	ARHGEF7	protein_coding	5012.27	-0.903305	6.32708e-06	0.000109363	32.9234	2757.86	0.982423	2.68897e-05	0.000267298	19.2612	Rho guanine nucleotide exchange factor 7 [Source:HGNC Symbol;Acc:HGNC:15607]
ENSG00000102683.7	SGCG	protein_coding	383.833	0.691962	0.00403546	0.0174327	23.8434	672.014	-0.925982	0.000842735	0.00502942	39.6826	sarcoglycan gamma [Source:HGNC Symbol;Acc:HGNC:10809]
ENSG00000102760.12	RGCC	protein_coding	289.847	0.857296	0.00210757	0.0105264	29.3841	193.947	3.78566	1.60309e-18	1.9849e-16	30.796	regulator of cell cycle [Source:HGNC Symbol;Acc:HGNC:20369]
ENSG00000102878.16	HSF4	protein_coding	7570.23	-0.590258	0.0132082	0.0431109	177.22	2725.93	2.60357	4.98717e-18	5.80738e-16	88.7522	heat shock transcription factor 4 [Source:HGNC Symbol;Acc:HGNC:5227]
ENSG00000103018.16	CYB5B	protein_coding	4864.82	-0.710267	0.000205402	0.00171887	49.989	4610.85	-0.73058	0.00490483	0.0215287	65.482	cytochrome b5 type B [Source:HGNC Symbol;Acc:HGNC:24374]
ENSG00000103047.7	TANGO6	protein_coding	83.7564	1.00701	0.00552617	0.0221216	1.60403	422.263	-1.49592	1.01215e-07	1.97022e-06	6.59534	transport and golgi organization 6 homolog [Source:HGNC Symbol;Acc:HGNC:25749]
ENSG00000103145.10	HCFC1R1	protein_coding	4286.74	-0.793644	0.000191611	0.00163164	230.787	1880.98	1.05014	1.56734e-05	0.000167277	111.902	host cell factor C1 regulator 1 [Source:HGNC Symbol;Acc:HGNC:21198]
ENSG00000103150.5	MLYCD	protein_coding	643.725	0.868365	0.000460574	0.00322358	4.43687	1518.24	-0.941475	2.82681e-05	0.000278875	8.00794	malonyl-CoA decarboxylase [Source:HGNC Symbol;Acc:HGNC:7150]
ENSG00000103160.11	HSDL1	protein_coding	10269.3	-1.29179	8.508e-12	1.53039e-09	184.58	6656.05	0.606188	0.00773662	0.0308807	109.156	hydroxysteroid dehydrogenase like 1 [Source:HGNC Symbol;Acc:HGNC:16475]
ENSG00000103544.14	C16orf62	protein_coding	845.969	0.846411	0.000374911	0.0027462	9.93785	1645.91	-0.740188	0.0045825	0.0203513	14.3151	VPS35 endosomal protein sorting factor like [Source:HGNC Symbol;Acc:HGNC:24641]
ENSG00000103642.11	LACTB	protein_coding	1978.35	-0.676188	0.000908064	0.00545214	35.655	1607.79	1.62379	3.05837e-09	8.9034e-08	38.7089	lactamase beta [Source:HGNC Symbol;Acc:HGNC:16468]
ENSG00000104331.8	IMPAD1	protein_coding	15298.6	-1.48494	9.78611e-16	5.88786e-13	178.133	8936.83	1.35012	7.22195e-09	1.88377e-07	100.199	inositol monophosphatase domain containing 1 [Source:HGNC Symbol;Acc:HGNC:26019]
ENSG00000104356.10	POP1	protein_coding	395.005	0.92163	0.000139688	0.00128008	9.20835	974.862	-1.28357	0.000249784	0.00180848	24.4774	POP1 homolog, ribonuclease P/MRP subunit [Source:HGNC Symbol;Acc:HGNC:30129]
ENSG00000104381.12	GDAP1	protein_coding	212.795	1.31883	7.92812e-06	0.000130747	7.47643	408.108	-2.55616	2.36385e-11	1.08047e-09	11.4826	ganglioside induced differentiation associated protein 1 [Source:HGNC Symbol;Acc:HGNC:15968]
ENSG00000104419.14	NDRG1	protein_coding	206514	-0.695056	0.000265112	0.00209591	1550.6	53348.9	5.00526	4.1603e-64	1.01735e-60	688.469	N-myc downstream regulated 1 [Source:HGNC Symbol;Acc:HGNC:7679]
ENSG00000104517.12	UBR5	protein_coding	45903	-0.914503	2.76734e-06	5.57558e-05	264.028	41429	0.68346	0.000997264	0.00579432	228.757	ubiquitin protein ligase E3 component n-recognin 5 [Source:HGNC Symbol;Acc:HGNC:16806]
ENSG00000104611.11	SH2D4A	protein_coding	1168.79	0.586485	0.0145673	0.0465684	26.9019	779.059	0.730434	0.00208125	0.010709	15.2918	SH2 domain containing 4A [Source:HGNC Symbol;Acc:HGNC:26102]
ENSG00000104689.9	TNFRSF10A	protein_coding	1061.46	-0.732387	0.000297348	0.00229665	27.7752	528.773	0.865089	0.00357083	0.016724	13.7854	TNF receptor superfamily member 10a [Source:HGNC Symbol;Acc:HGNC:11904]
ENSG00000104859.14	CLASRP	protein_coding	4582.89	-0.726409	0.00103106	0.00604096	72.4992	2177.38	0.746761	0.000608729	0.00382052	33.2466	CLK4 associating serine/arginine rich protein [Source:HGNC Symbol;Acc:HGNC:17731]
ENSG00000104885.17	DOT1L	protein_coding	5262.22	-1.01095	7.55395e-06	0.000126368	39.6173	1573.48	1.1553	1.53775e-07	2.87051e-06	11.9007	DOT1 like histone lysine methyltransferase [Source:HGNC Symbol;Acc:HGNC:24948]
ENSG00000105141.5	CASP14	protein_coding	154.082	1.77412	1.83001e-08	9.33627e-07	6.58553	502.568	2.09455	2.25112e-07	4.06636e-06	20.9786	caspase 14 [Source:HGNC Symbol;Acc:HGNC:1502]
ENSG00000105202.7	FBL	protein_coding	25886.5	-0.888369	2.48734e-05	0.000326923	936.119	5370.5	1.07177	1.87777e-05	0.000196129	220.724	fibrillarin [Source:HGNC Symbol;Acc:HGNC:3599]
ENSG00000105204.13	DYRK1B	protein_coding	2364.36	0.721913	0.000191905	0.00163334	76.6316	1732.56	1.10591	7.61483e-07	1.19462e-05	49.1814	dual specificity tyrosine phosphorylation regulated kinase 1B [Source:HGNC Symbol;Acc:HGNC:3092]
ENSG00000105220.14	GPI	protein_coding	227694	-1.37488	4.32046e-09	2.92184e-07	2309	63400.4	2.86172	5.02176e-23	9.26798e-21	862.69	glucose-6-phosphate isomerase [Source:HGNC Symbol;Acc:HGNC:4458]
ENSG00000105290.11	APLP1	protein_coding	727.503	-0.881799	4.6691e-05	0.000535611	14.9041	305.111	1.46717	3.27166e-06	4.27831e-05	7.6339	amyloid beta precursor like protein 1 [Source:HGNC Symbol;Acc:HGNC:597]
ENSG00000105339.10	DENND3	protein_coding	2406.97	-0.896036	4.41171e-05	0.000516268	13.1676	740.239	1.9216	4.35461e-08	9.43402e-07	6.25104	DENN domain containing 3 [Source:HGNC Symbol;Acc:HGNC:29134]
ENSG00000105388.15	CEACAM5	protein_coding	11658.3	-0.654463	0.000405548	0.00291834	260.111	1167.69	2.51731	3.70787e-18	4.45013e-16	39.4499	carcinoembryonic antigen related cell adhesion molecule 5 [Source:HGNC Symbol;Acc:HGNC:1817]
ENSG00000105472.12	CLEC11A	protein_coding	325.825	-0.950215	0.000285326	0.0022205	17.9664	233.517	-1.16353	0.000676567	0.00416242	15.9635	C-type lectin domain containing 11A [Source:HGNC Symbol;Acc:HGNC:10576]
ENSG00000105516.10	DBP	protein_coding	5397.65	-0.803002	0.000195488	0.00164892	63.5164	3057.8	1.50859	4.28857e-06	5.42322e-05	53.5398	D-box binding PAR bZIP transcription factor [Source:HGNC Symbol;Acc:HGNC:2697]
ENSG00000105607.12	GCDH	protein_coding	533.375	0.72822	0.00130279	0.00726869	13.1913	630.747	-1.5686	6.19228e-09	1.64816e-07	15.9802	glutaryl-CoA dehydrogenase [Source:HGNC Symbol;Acc:HGNC:4189]
ENSG00000105613.9	MAST1	protein_coding	1892.8	-1.39504	1.42646e-08	7.82672e-07	26.4509	444.61	3.01954	4.71045e-22	8.08338e-20	8.21995	microtubule associated serine/threonine kinase 1 [Source:HGNC Symbol;Acc:HGNC:19034]
ENSG00000105649.9	RAB3A	protein_coding	1991.06	-1.70464	1.37194e-10	1.54436e-08	116.317	441.334	1.82722	6.48791e-08	1.34026e-06	25.5292	RAB3A, member RAS oncogene family [Source:HGNC Symbol;Acc:HGNC:9777]
ENSG00000105668.7	UPK1A	protein_coding	1017.09	-0.64503	0.00347674	0.0155464	55.7522	267.735	3.43063	1.28982e-21	2.13838e-19	25.5134	uroplakin 1A [Source:HGNC Symbol;Acc:HGNC:12577]
ENSG00000105700.10	KXD1	protein_coding	7545.22	-0.709871	0.000396385	0.00286382	134.98	4871.49	0.605288	0.0116847	0.0430963	92.6919	KxDL motif containing 1 [Source:HGNC Symbol;Acc:HGNC:28420]
ENSG00000105701.15	FKBP8	protein_coding	31664.5	-0.727404	0.000414553	0.00297414	816.418	14823.2	0.727776	0.000884979	0.00524473	385.939	FK506 binding protein 8 [Source:HGNC Symbol;Acc:HGNC:3724]
ENSG00000105835.11	NAMPT	protein_coding	13863.3	-1.27891	4.27699e-08	1.875e-06	140.575	5784.73	1.79619	1.74352e-09	5.3884e-08	72.7832	nicotinamide phosphoribosyltransferase [Source:HGNC Symbol;Acc:HGNC:30092]
ENSG00000105855.9	ITGB8	protein_coding	402.448	2.56334	5.68814e-21	1.24058e-17	4.15587	680.131	1.61639	2.65897e-09	7.83394e-08	4.44292	integrin subunit beta 8 [Source:HGNC Symbol;Acc:HGNC:6163]
ENSG00000105856.13	HBP1	protein_coding	11331.4	-0.661182	0.000854256	0.0052152	129.421	9693.99	0.81652	0.000189258	0.00142732	117.288	HMG-box transcription factor 1 [Source:HGNC Symbol;Acc:HGNC:23200]
ENSG00000105948.13	TTC26	protein_coding	334.285	0.71828	0.00601692	0.023581	7.45601	365.709	-1.82633	1.71961e-08	4.0997e-07	7.64259	tetratricopeptide repeat domain 26 [Source:HGNC Symbol;Acc:HGNC:21882]
ENSG00000105953.14	OGDH	protein_coding	3283.78	0.589538	0.0147231	0.0469548	63.9319	5520.7	-0.719564	0.00148198	0.00807702	94.6719	oxoglutarate dehydrogenase [Source:HGNC Symbol;Acc:HGNC:8124]
ENSG00000105968.18	H2AFV	protein_coding	4822.79	-0.657421	0.000577827	0.00385394	71.0213	5489.54	-1.42554	3.15029e-09	9.13024e-08	116.789	H2A histone family member V [Source:HGNC Symbol;Acc:HGNC:20664]
ENSG00000106031.7	HOXA13	protein_coding	1322.04	-0.906794	1.29448e-05	0.000194707	22.6449	277.642	3.95343	2.19877e-21	3.52578e-19	6.52868	homeobox A13 [Source:HGNC Symbol;Acc:HGNC:5102]
ENSG00000106086.18	PLEKHA8	protein_coding	4091.41	-1.07628	7.53512e-08	3.00166e-06	31.8498	2539.31	1.63859	4.89447e-11	2.09979e-09	22.9333	pleckstrin homology domain containing A8 [Source:HGNC Symbol;Acc:HGNC:30037]
ENSG00000106089.11	STX1A	protein_coding	901.239	-0.891093	0.000127108	0.00119486	19.5812	407.817	0.844214	0.00396358	0.0181167	10.1298	syntaxin 1A [Source:HGNC Symbol;Acc:HGNC:11433]
ENSG00000106105.13	GARS	protein_coding	4987.27	-0.710995	0.000548818	0.00369436	89.0927	7642.57	-1.05889	0.00364098	0.0169666	241.902	glycyl-tRNA synthetase [Source:HGNC Symbol;Acc:HGNC:4162]
ENSG00000106211.8	HSPB1	protein_coding	91596.9	-0.877371	7.16216e-06	0.000121208	4220.2	53974.1	0.932159	0.000224478	0.00165155	2829.3	heat shock protein family B (small) member 1 [Source:HGNC Symbol;Acc:HGNC:5246]
ENSG00000106261.16	ZKSCAN1	protein_coding	20628.6	0.638001	0.000604845	0.00398992	196.873	14951	1.02744	4.93596e-07	8.13498e-06	117.308	zinc finger with KRAB and SCAN domains 1 [Source:HGNC Symbol;Acc:HGNC:13101]
ENSG00000106268.15	NUDT1	protein_coding	1187.36	-0.776422	0.000330703	0.00248978	44.5364	894.444	-0.92319	0.000244105	0.00177459	42.9858	nudix hydrolase 1 [Source:HGNC Symbol;Acc:HGNC:8048]
ENSG00000106392.10	C1GALT1	protein_coding	3249.32	-1.029	1.31653e-06	3.12103e-05	34.2026	1644.45	1.54349	2.56812e-11	1.15978e-09	20.6651	core 1 synthase, glycoprotein-N-acetylgalactosamine 3-beta-galactosyltransferase 1 [Source:HGNC Symbol;Acc:HGNC:24337]
ENSG00000106477.18	CEP41	protein_coding	448.717	1.09915	9.6987e-05	0.000965334	4.30134	608.157	-0.997618	0.000999165	0.00580364	4.79806	centrosomal protein 41 [Source:HGNC Symbol;Acc:HGNC:12370]
ENSG00000106537.7	TSPAN13	protein_coding	7474.74	-0.725781	0.000100031	0.000990543	240.503	8758.48	-1.17985	4.14279e-08	9.00505e-07	370.704	tetraspanin 13 [Source:HGNC Symbol;Acc:HGNC:21643]
ENSG00000106628.10	POLD2	protein_coding	4687.03	-0.721157	0.000124339	0.00117332	91.5639	3787.12	-0.929469	6.65323e-05	0.000582098	90.2132	DNA polymerase delta 2, accessory subunit [Source:HGNC Symbol;Acc:HGNC:9176]
ENSG00000106803.9	SEC61B	protein_coding	4004.99	-0.786098	0.000361501	0.00266363	267.309	2655.83	-0.733792	0.00056016	0.00355793	182.122	Sec61 translocon beta subunit [Source:HGNC Symbol;Acc:HGNC:16993]
ENSG00000107036.11	RIC1	protein_coding	4468.16	-0.680234	0.000259511	0.00206577	40.4791	3999.46	0.754389	0.000597441	0.00376417	34.7059	RIC1 homolog, RAB6A GEF complex partner 1 [Source:HGNC Symbol;Acc:HGNC:17686]
ENSG00000107099.15	DOCK8	protein_coding	830.721	1.95878	7.38239e-10	6.38648e-08	9.15092	1360.71	-1.04748	0.00626925	0.026132	10.3053	dedicator of cytokinesis 8 [Source:HGNC Symbol;Acc:HGNC:19191]
ENSG00000107159.12	CA9	protein_coding	2795.68	-0.898969	1.02185e-06	2.53617e-05	136.234	980.416	7.74809	2.72516e-61	4.44269e-58	80.7223	carbonic anhydrase 9 [Source:HGNC Symbol;Acc:HGNC:1383]
ENSG00000107201.9	DDX58	protein_coding	530.797	1.02008	2.88831e-05	0.000367044	13.2993	605.558	-0.826734	0.00722167	0.0292561	12.0083	DExD/H-box helicase 58 [Source:HGNC Symbol;Acc:HGNC:19102]
ENSG00000107372.12	ZFAND5	protein_coding	7034.19	-0.709801	0.000617232	0.00405019	131.848	4636.32	0.858657	5.36758e-05	0.000487267	95.397	zinc finger AN1-type containing 5 [Source:HGNC Symbol;Acc:HGNC:13008]
ENSG00000107404.17	DVL1	protein_coding	5526.82	-0.621761	0.00141719	0.00780773	100.104	3909.2	0.705769	0.00152321	0.00826818	76.9334	dishevelled segment polarity protein 1 [Source:HGNC Symbol;Acc:HGNC:3084]
ENSG00000107854.5	TNKS2	protein_coding	7674.25	-0.586215	0.00147758	0.00806157	90.2548	5496.01	0.644157	0.00214442	0.0109763	65.7059	tankyrase 2 [Source:HGNC Symbol;Acc:HGNC:15677]
ENSG00000107968.9	MAP3K8	protein_coding	1249.94	-0.823656	0.00197176	0.0100288	30.8175	619.707	1.80732	1.23342e-12	7.2028e-11	18.3869	mitogen-activated protein kinase kinase kinase 8 [Source:HGNC Symbol;Acc:HGNC:6860]
ENSG00000108039.17	XPNPEP1	protein_coding	4783.73	-0.859896	6.26718e-06	0.000108806	52.5744	3002.11	0.855934	0.00019196	0.00144379	35.0735	X-prolyl aminopeptidase 1 [Source:HGNC Symbol;Acc:HGNC:12822]
ENSG00000108187.15	PBLD	protein_coding	205.146	1.62626	3.95251e-08	1.75034e-06	5.28149	309.88	-1.75793	2.79445e-09	8.19609e-08	6.1427	phenazine biosynthesis like protein domain containing [Source:HGNC Symbol;Acc:HGNC:23301]
ENSG00000108312.14	UBTF	protein_coding	4204.26	0.591645	0.00161436	0.00859548	62.3014	6054.97	-1.4999	5.79471e-11	2.4171e-09	88.9593	upstream binding transcription factor [Source:HGNC Symbol;Acc:HGNC:12511]
ENSG00000108349.14	CASC3	protein_coding	5738.84	-0.79382	0.000270044	0.00212282	69.5656	4271.28	0.742582	0.00654088	0.0270451	55.8925	CASC3, exon junction complex subunit [Source:HGNC Symbol;Acc:HGNC:17040]
ENSG00000108551.4	RASD1	protein_coding	1695.11	-1.25211	1.42055e-07	4.91781e-06	107.426	153.337	2.17443	6.90299e-10	2.35267e-08	9.24231	ras related dexamethasone induced 1 [Source:HGNC Symbol;Acc:HGNC:15828]
ENSG00000108588.13	CCDC47	protein_coding	21015.7	-0.686187	0.000236847	0.00192657	324.676	16425.9	0.612384	0.00492573	0.021601	259.986	coiled-coil domain containing 47 [Source:HGNC Symbol;Acc:HGNC:24856]
ENSG00000108932.11	SLC16A6	protein_coding	455.253	1.80933	4.22213e-13	1.15106e-10	15.0814	742.174	-2.21116	3.50838e-10	1.29255e-08	21.0364	solute carrier family 16 member 6 [Source:HGNC Symbol;Acc:HGNC:10927]
ENSG00000108947.4	EFNB3	protein_coding	966.534	0.6675	0.000987732	0.00582819	30.507	989.322	1.3876	5.69665e-06	6.93921e-05	36.4553	ephrin B3 [Source:HGNC Symbol;Acc:HGNC:3228]
ENSG00000109046.14	WSB1	protein_coding	128228	-0.677551	0.00417858	0.0178497	1188.53	32152.2	2.07557	0.000288026	0.00202802	537.261	WD repeat and SOCS box containing 1 [Source:HGNC Symbol;Acc:HGNC:19221]
ENSG00000109107.13	ALDOC	protein_coding	41913.1	-1.29627	9.73664e-09	5.75344e-07	1288.29	11862.6	4.68032	8.25113e-52	8.9676e-49	559.151	aldolase, fructose-bisphosphate C [Source:HGNC Symbol;Acc:HGNC:418]
ENSG00000109501.13	WFS1	protein_coding	1712.5	-0.888814	5.3629e-06	9.68653e-05	29.5349	2820.82	-1.15379	5.62429e-07	9.14212e-06	62.0372	wolframin ER transmembrane glycoprotein [Source:HGNC Symbol;Acc:HGNC:12762]
ENSG00000109705.7	NKX3-2	protein_coding	85.0299	1.26383	0.00079323	0.00494119	4.25361	117.767	1.03015	0.0118462	0.0435501	4.25492	NK3 homeobox 2 [Source:HGNC Symbol;Acc:HGNC:951]
ENSG00000109736.14	MFSD10	protein_coding	11008.5	-0.874881	1.46437e-05	0.000214168	270.657	2457.69	0.665854	0.00344351	0.0162248	56.1649	major facilitator superfamily domain containing 10 [Source:HGNC Symbol;Acc:HGNC:16894]
ENSG00000109762.15	SNX25	protein_coding	561.993	-0.913899	3.07649e-05	0.000385069	10.0412	786.781	1.52384	6.76367e-10	2.32544e-08	17.3103	sorting nexin 25 [Source:HGNC Symbol;Acc:HGNC:21883]
ENSG00000109805.9	NCAPG	protein_coding	2717.3	-0.729494	9.35139e-05	0.00093718	41.0109	3284.82	-0.753464	0.00369208	0.0171604	61.2254	non-SMC condensin I complex subunit G [Source:HGNC Symbol;Acc:HGNC:24304]
ENSG00000109920.12	FNBP4	protein_coding	16163.2	-0.604636	0.00159642	0.00852075	146.816	12463.6	1.1449	2.37964e-08	5.47681e-07	138.158	formin binding protein 4 [Source:HGNC Symbol;Acc:HGNC:19752]
ENSG00000110025.12	SNX15	protein_coding	43.0449	1.20021	0.00640819	0.0247094	1.2416	76.6719	-1.11737	0.00832938	0.032727	1.57388	sorting nexin 15 [Source:HGNC Symbol;Acc:HGNC:14978]
ENSG00000110063.8	DCPS	protein_coding	846.606	-0.924148	8.15426e-06	0.000133718	19.8922	468.577	-0.981733	0.00205043	0.0105866	13.049	decapping enzyme, scavenger [Source:HGNC Symbol;Acc:HGNC:29812]
ENSG00000110195.11	FOLR1	protein_coding	24.7553	-1.13476	0.0157517	0.0494753	1.62944	60.2953	-1.85924	0.00035406	0.00241341	5.85119	folate receptor 1 [Source:HGNC Symbol;Acc:HGNC:3791]
ENSG00000110422.11	HIPK3	protein_coding	5374.78	-0.774157	3.44589e-05	0.000420153	58.8338	12997.5	0.826148	5.40351e-05	0.000490074	127.073	homeodomain interacting protein kinase 3 [Source:HGNC Symbol;Acc:HGNC:4915]
ENSG00000110436.11	SLC1A2	protein_coding	119.042	1.47954	3.01527e-05	0.000379135	1.36684	1818.63	-1.08852	1.36703e-05	0.000149154	13.9212	solute carrier family 1 member 2 [Source:HGNC Symbol;Acc:HGNC:10940]
ENSG00000110455.13	ACCS	protein_coding	659.099	1.28723	7.15508e-09	4.41137e-07	14.5397	383.178	-1.33823	1.28342e-06	1.88637e-05	6.64864	1-aminocyclopropane-1-carboxylate synthase homolog (inactive) [Source:HGNC Symbol;Acc:HGNC:23989]
ENSG00000110723.11	EXPH5	protein_coding	1268.69	-0.71534	0.000413544	0.00296812	9.92299	2606.48	1.00709	0.000195697	0.00146683	21.9477	exophilin 5 [Source:HGNC Symbol;Acc:HGNC:30578]
ENSG00000110880.10	CORO1C	protein_coding	7965.88	-0.696507	0.000116665	0.00111112	92.1139	4368.58	0.980995	3.75175e-06	4.81282e-05	54.3415	coronin 1C [Source:HGNC Symbol;Acc:HGNC:2254]
ENSG00000110955.8	ATP5B	protein_coding	26019.4	-0.646199	0.000465993	0.00325617	820.802	21723.1	-0.69933	0.000644559	0.00399541	804.625	ATP synthase F1 subunit beta [Source:HGNC Symbol;Acc:HGNC:830]
ENSG00000111052.7	LIN7A	protein_coding	1381.69	1.45573	1.75702e-11	2.66579e-09	26.1621	4482.14	0.801854	0.00164112	0.00880079	58.3965	lin-7 homolog A, crumbs cell polarity complex component [Source:HGNC Symbol;Acc:HGNC:17787]
ENSG00000111077.17	TNS2	protein_coding	1188.45	0.67901	0.00263815	0.012556	15.9157	580.544	0.745149	0.00635653	0.0264243	5.9069	tensin 2 [Source:HGNC Symbol;Acc:HGNC:19737]
ENSG00000111247.14	RAD51AP1	protein_coding	647.433	-0.668215	0.00199242	0.0101073	20.7606	935.159	-1.39896	5.68275e-08	1.19539e-06	39.3372	RAD51 associated protein 1 [Source:HGNC Symbol;Acc:HGNC:16956]
ENSG00000111276.10	CDKN1B	protein_coding	17340	-0.810423	5.87789e-06	0.000103384	481.889	11449.3	0.983379	0.000364572	0.00247643	366.209	cyclin dependent kinase inhibitor 1B [Source:HGNC Symbol;Acc:HGNC:1785]
ENSG00000111358.13	GTF2H3	protein_coding	1306.69	0.631932	0.00147075	0.00803431	33.8791	2013.87	-0.874192	0.000123555	0.00100004	47.4143	general transcription factor IIH subunit 3 [Source:HGNC Symbol;Acc:HGNC:4657]
ENSG00000111640.14	GAPDH	protein_coding	3.50886e+06	-0.972487	5.27339e-06	9.55453e-05	93697.7	889009	3.34207	2.23542e-28	6.94152e-26	39306.4	glyceraldehyde-3-phosphate dehydrogenase [Source:HGNC Symbol;Acc:HGNC:4141]
ENSG00000111669.14	TPI1	protein_coding	79712	-0.645012	0.000344446	0.00256614	2131.3	42118.4	1.5099	2.16805e-12	1.24016e-10	1408.17	triosephosphate isomerase 1 [Source:HGNC Symbol;Acc:HGNC:12009]
ENSG00000111674.8	ENO2	protein_coding	71083.1	-1.39157	1.24073e-09	1.0116e-07	1530.03	11673.9	4.16192	1.61964e-39	9.60154e-37	388.617	enolase 2 [Source:HGNC Symbol;Acc:HGNC:3353]
ENSG00000111816.7	FRK	protein_coding	704.588	0.774867	0.0039046	0.0169935	5.59554	770.405	1.2534	0.000533566	0.0034201	7.28675	fyn related Src family tyrosine kinase [Source:HGNC Symbol;Acc:HGNC:3955]
ENSG00000112110.9	MRPL18	protein_coding	1304.52	-0.62441	0.00452856	0.0189801	69.7335	1387.79	-0.801922	0.000333649	0.00229669	86.457	mitochondrial ribosomal protein L18 [Source:HGNC Symbol;Acc:HGNC:14477]
ENSG00000112118.17	MCM3	protein_coding	1727.57	0.775379	0.000542877	0.00367087	58.3179	6215.18	-1.78055	3.29075e-07	5.69707e-06	196.055	minichromosome maintenance complex component 3 [Source:HGNC Symbol;Acc:HGNC:6945]
ENSG00000112167.9	SAYSD1	protein_coding	481.705	1.27313	2.89987e-05	0.000368246	21.1364	1142.74	-1.13956	2.62417e-06	3.53071e-05	35.5796	SAYSVFN motif domain containing 1 [Source:HGNC Symbol;Acc:HGNC:21025]
ENSG00000112175.7	BMP5	protein_coding	1017.45	1.34345	2.53168e-06	5.25255e-05	36.839	5780.84	-1.1623	5.12691e-06	6.32394e-05	133.958	bone morphogenetic protein 5 [Source:HGNC Symbol;Acc:HGNC:1072]
ENSG00000112245.9	PTP4A1	protein_coding	23190.6	-0.802196	0.000856104	0.00522101	339.686	11046.7	1.15864	4.37269e-06	5.51534e-05	169.116	protein tyrosine phosphatase type IVA, member 1 [Source:HGNC Symbol;Acc:HGNC:9634]
ENSG00000112249.13	ASCC3	protein_coding	8999.69	-0.690385	0.000258228	0.00206017	54.784	14722.2	0.617149	0.00236238	0.011841	97.7507	activating signal cointegrator 1 complex subunit 3 [Source:HGNC Symbol;Acc:HGNC:18697]
ENSG00000112294.12	ALDH5A1	protein_coding	1904.43	0.95847	9.04913e-06	0.000146329	37.6721	2425.59	-1.12792	5.85749e-06	7.09536e-05	40.943	aldehyde dehydrogenase 5 family member A1 [Source:HGNC Symbol;Acc:HGNC:408]
ENSG00000112305.14	SMAP1	protein_coding	5694.89	-0.876586	1.3564e-05	0.000201075	107.735	3516.02	1.32994	7.16707e-08	1.45188e-06	82.2228	small ArfGAP 1 [Source:HGNC Symbol;Acc:HGNC:19651]
ENSG00000112335.14	SNX3	protein_coding	15322.4	-0.912632	1.96914e-05	0.000272031	669.815	6930.31	0.973253	8.8694e-05	0.000750139	324.613	sorting nexin 3 [Source:HGNC Symbol;Acc:HGNC:11174]
ENSG00000112511.17	PHF1	protein_coding	3390.81	-0.649602	0.00272247	0.0128765	70.5406	2786.51	1.62406	2.9013e-11	1.28703e-09	71.8824	PHD finger protein 1 [Source:HGNC Symbol;Acc:HGNC:8919]
ENSG00000112715.20	VEGFA	protein_coding	43679.4	-1.35805	1.07906e-08	6.19322e-07	287.393	13789.2	2.66617	1.50949e-14	1.18121e-12	107.468	vascular endothelial growth factor A [Source:HGNC Symbol;Acc:HGNC:12680]
ENSG00000112759.16	SLC29A1	protein_coding	844.136	-0.606674	0.00396754	0.017216	19.7224	794.629	-1.16289	8.97516e-05	0.000757468	30.3168	solute carrier family 29 member 1 (Augustine blood group) [Source:HGNC Symbol;Acc:HGNC:11003]
ENSG00000112941.13	PAPD7	protein_coding	6044.78	-0.859716	1.3751e-05	0.000203156	67.1649	3408.18	1.20051	1.31714e-08	3.22493e-07	45.3672	terminal nucleotidyltransferase 4A [Source:HGNC Symbol;Acc:HGNC:16705]
ENSG00000113083.12	LOX	protein_coding	3458.33	-1.61952	5.82974e-16	3.74106e-13	59.5136	161.456	4.42486	6.34361e-19	8.05844e-17	4.59146	lysyl oxidase [Source:HGNC Symbol;Acc:HGNC:6664]
ENSG00000113119.12	TMCO6	protein_coding	484.925	0.65755	0.00834261	0.0303633	14.6459	418.862	-1.37173	3.88261e-06	4.96766e-05	13.5134	transmembrane and coiled-coil domains 6 [Source:HGNC Symbol;Acc:HGNC:28814]
ENSG00000113328.18	CCNG1	protein_coding	14213.6	-0.611702	0.000704234	0.00448612	333.866	15507.2	1.07221	3.37544e-06	4.39639e-05	417.755	cyclin G1 [Source:HGNC Symbol;Acc:HGNC:1592]
ENSG00000113494.16	PRLR	protein_coding	1937.27	0.716367	0.00345158	0.0154617	15.6182	7210.92	-0.830815	0.000728981	0.00443303	48.9213	prolactin receptor [Source:HGNC Symbol;Acc:HGNC:9446]
ENSG00000113615.12	SEC24A	protein_coding	9238.54	-0.765741	6.20449e-05	0.000673652	93.804	6979.77	1.35999	4.61156e-11	1.99152e-09	85.1433	SEC24 homolog A, COPII coat complex component [Source:HGNC Symbol;Acc:HGNC:10703]
ENSG00000113739.10	STC2	protein_coding	73176.3	-1.45678	1.13887e-15	6.41001e-13	1049.94	30591.5	1.3956	2.52331e-11	1.14532e-09	483.662	stanniocalcin 2 [Source:HGNC Symbol;Acc:HGNC:11374]
ENSG00000113763.10	UNC5A	protein_coding	264.324	-1.66283	3.6749e-10	3.54252e-08	5.33434	123.157	-1.19618	0.00206512	0.0106428	2.82887	unc-5 netrin receptor A [Source:HGNC Symbol;Acc:HGNC:12567]
ENSG00000113790.10	EHHADH	protein_coding	359.096	1.72742	1.00088e-07	3.75557e-06	10.7582	530.88	-1.75368	4.46298e-11	1.94021e-09	12.0415	enoyl-CoA hydratase and 3-hydroxyacyl CoA dehydrogenase [Source:HGNC Symbol;Acc:HGNC:3247]
ENSG00000114023.15	FAM162A	protein_coding	18662.5	-0.858758	1.08489e-05	0.000169464	369.662	5761.39	2.89756	1.1201e-37	5.92232e-35	162.323	family with sequence similarity 162 member A [Source:HGNC Symbol;Acc:HGNC:17865]
ENSG00000114026.21	OGG1	protein_coding	929.678	0.875996	4.58359e-05	0.000528931	11.7462	1161.42	-0.899098	0.000104505	0.000863146	12.0689	8-oxoguanine DNA glycosylase [Source:HGNC Symbol;Acc:HGNC:8125]
ENSG00000114054.13	PCCB	protein_coding	2570.1	-0.781408	0.000218858	0.0018115	24.9284	2926.83	-1.39078	2.74209e-08	6.20874e-07	37.8536	propionyl-CoA carboxylase subunit beta [Source:HGNC Symbol;Acc:HGNC:8654]
ENSG00000114120.11	SLC25A36	protein_coding	15372.1	-0.919774	7.98073e-07	2.07214e-05	125.433	8318.07	0.838146	0.000823834	0.00493619	67.4175	solute carrier family 25 member 36 [Source:HGNC Symbol;Acc:HGNC:25554]
ENSG00000114268.11	PFKFB4	protein_coding	18347.5	-0.840876	7.20867e-06	0.000121877	220.676	5419.66	4.59117	7.479e-63	1.62569e-59	109.07	6-phosphofructo-2-kinase/fructose-2,6-biphosphatase 4 [Source:HGNC Symbol;Acc:HGNC:8875]
ENSG00000114270.15	COL7A1	protein_coding	980.211	0.73332	0.00177731	0.00927623	10.6437	919.612	1.09466	6.36167e-06	7.60158e-05	7.2784	collagen type VII alpha 1 chain [Source:HGNC Symbol;Acc:HGNC:2214]
ENSG00000114279.13	FGF12	protein_coding	106.269	0.84874	0.0136379	0.0442706	1.7088	407.392	-1.2207	3.22259e-05	0.000312406	5.4788	fibroblast growth factor 12 [Source:HGNC Symbol;Acc:HGNC:3668]
ENSG00000114315.3	HES1	protein_coding	10740.5	-0.694641	0.00236499	0.0115103	400.142	3580.79	0.720909	0.00396655	0.0181218	151.849	hes family bHLH transcription factor 1 [Source:HGNC Symbol;Acc:HGNC:5192]
ENSG00000114383.9	TUSC2	protein_coding	1009.32	-0.84531	0.000248473	0.0020034	33.0804	851.501	-0.805296	0.00116515	0.00659354	29.3703	tumor suppressor 2, mitochondrial calcium regulator [Source:HGNC Symbol;Acc:HGNC:17034]
ENSG00000114446.4	IFT57	protein_coding	747.537	0.678331	0.00119301	0.00678879	20.6796	1199.02	-1.04322	8.7617e-06	0.00010059	28.6267	intraflagellar transport 57 [Source:HGNC Symbol;Acc:HGNC:17367]
ENSG00000114480.12	GBE1	protein_coding	12548.6	-0.590575	0.000997662	0.00587089	188.834	8660.61	2.39235	1.29916e-16	1.34473e-14	201.978	1,4-alpha-glucan branching enzyme 1 [Source:HGNC Symbol;Acc:HGNC:4180]
ENSG00000114554.11	PLXNA1	protein_coding	3695.92	0.732925	0.00026937	0.00212093	35.375	5131.57	-0.909961	0.00148555	0.00809068	42.2211	plexin A1 [Source:HGNC Symbol;Acc:HGNC:9099]
ENSG00000114631.10	PODXL2	protein_coding	483.336	1.91069	5.51572e-16	3.70147e-13	30.5417	830.872	-1.7891	7.99173e-08	1.59365e-06	44.2079	podocalyxin like 2 [Source:HGNC Symbol;Acc:HGNC:17936]
ENSG00000114656.10	KIAA1257	protein_coding	83.5254	0.97353	0.00642483	0.0247626	1.26491	286.904	-0.816179	0.0072776	0.02944	3.49912	KIAA1257 [Source:HGNC Symbol;Acc:HGNC:29231]
ENSG00000114853.13	ZBTB47	protein_coding	122.943	1.15698	0.000662402	0.00428376	3.68911	114.368	1.22219	0.00197791	0.0102555	2.73512	zinc finger and BTB domain containing 47 [Source:HGNC Symbol;Acc:HGNC:26955]
ENSG00000115286.19	NDUFS7	protein_coding	1327.56	-1.17178	1.73405e-06	3.90397e-05	15.9815	889.291	-0.714161	0.00408669	0.0185753	9.59697	NADH:ubiquinone oxidoreductase core subunit S7 [Source:HGNC Symbol;Acc:HGNC:7714]
ENSG00000115295.19	CLIP4	protein_coding	356.602	0.741667	0.00186742	0.00958931	4.79341	339.444	3.09495	1.32332e-24	2.81393e-22	5.33948	CAP-Gly domain containing linker protein family member 4 [Source:HGNC Symbol;Acc:HGNC:26108]
ENSG00000115350.11	POLE4	protein_coding	2307.23	-0.942384	4.23867e-05	0.000499705	89.8354	1875.52	-0.847844	0.000179961	0.00136934	77.732	DNA polymerase epsilon 4, accessory subunit [Source:HGNC Symbol;Acc:HGNC:18755]
ENSG00000115461.4	IGFBP5	protein_coding	24135.9	2.4484	6.38845e-19	7.43104e-16	541.639	12891.8	1.45538	2.33969e-08	5.39707e-07	228.225	insulin like growth factor binding protein 5 [Source:HGNC Symbol;Acc:HGNC:5474]
ENSG00000115526.10	CHST10	protein_coding	100.752	1.11931	0.00228303	0.0111841	3.07627	295.271	-2.53871	6.56497e-14	4.73913e-12	7.79632	carbohydrate sulfotransferase 10 [Source:HGNC Symbol;Acc:HGNC:19650]
ENSG00000115548.16	KDM3A	protein_coding	23855.9	-0.650107	0.00084615	0.00518204	127.995	8921.69	2.3224	1.83236e-26	5.04879e-24	67.1464	lysine demethylase 3A [Source:HGNC Symbol;Acc:HGNC:20815]
ENSG00000115594.11	IL1R1	protein_coding	57.158	1.56683	0.000247646	0.00199858	1.4462	533.646	-2.50924	2.62154e-09	7.73531e-08	10.7046	interleukin 1 receptor type 1 [Source:HGNC Symbol;Acc:HGNC:5993]
ENSG00000115641.18	FHL2	protein_coding	670.782	-0.787447	0.00151821	0.00820878	7.90049	189.667	1.82474	1.43552e-06	2.08952e-05	3.27192	four and a half LIM domains 2 [Source:HGNC Symbol;Acc:HGNC:3703]
ENSG00000115652.14	UXS1	protein_coding	3899.88	-1.3157	5.19362e-12	9.95806e-10	45.9517	2855.04	0.732159	0.00127207	0.00710407	30.772	UDP-glucuronate decarboxylase 1 [Source:HGNC Symbol;Acc:HGNC:17729]
ENSG00000115657.12	ABCB6	protein_coding	528.513	-0.877294	0.000228521	0.00187282	7.83809	332.855	1.42923	0.000128299	0.00103288	7.26353	ATP binding cassette subfamily B member 6 (Langereis blood group) [Source:HGNC Symbol;Acc:HGNC:47]
ENSG00000115738.9	ID2	protein_coding	14795.7	-0.771309	0.000230047	0.00188356	520.21	11627.8	1.45567	5.87537e-12	3.02473e-10	503.867	inhibitor of DNA binding 2 [Source:HGNC Symbol;Acc:HGNC:5361]
ENSG00000115758.12	ODC1	protein_coding	758.094	1.55996	2.12659e-11	3.11804e-09	35.2963	2601.43	-3.15025	3.1372e-39	1.80509e-36	107.435	ornithine decarboxylase 1 [Source:HGNC Symbol;Acc:HGNC:8109]
ENSG00000115840.13	SLC25A12	protein_coding	363.033	0.6384	0.00931685	0.0330005	7.60358	358.196	-2.21208	2.82628e-14	2.13477e-12	7.66978	solute carrier family 25 member 12 [Source:HGNC Symbol;Acc:HGNC:10982]
ENSG00000115963.13	RND3	protein_coding	9458.39	-0.953266	6.40681e-06	0.00011057	214.099	4732.36	1.61518	7.20695e-11	2.9682e-09	128.704	Rho family GTPase 3 [Source:HGNC Symbol;Acc:HGNC:671]
ENSG00000115993.11	TRAK2	protein_coding	2002.6	0.894342	0.000181601	0.00156705	31.1734	6199.45	-0.774965	0.00853415	0.0333334	71.0422	trafficking kinesin protein 2 [Source:HGNC Symbol;Acc:HGNC:13206]
ENSG00000116016.13	EPAS1	protein_coding	13394.5	-0.585249	0.000967699	0.0057313	137.46	2967.76	2.98191	6.42701e-42	4.49041e-39	46.1267	endothelial PAS domain protein 1 [Source:HGNC Symbol;Acc:HGNC:3374]
ENSG00000116039.11	ATP6V1B1	protein_coding	371.736	-0.786995	0.00170181	0.00895992	10.4448	518.537	-0.964436	0.00146796	0.00802168	18.8212	ATPase H+ transporting V1 subunit B1 [Source:HGNC Symbol;Acc:HGNC:853]
ENSG00000116151.13	MORN1	protein_coding	355.763	0.912903	0.000268401	0.0021152	3.67184	724.384	-0.760225	0.00370073	0.0171924	5.22347	MORN repeat containing 1 [Source:HGNC Symbol;Acc:HGNC:25852]
ENSG00000116212.14	LRRC42	protein_coding	2785.69	-0.671185	0.00161991	0.00861976	84.2464	1593.28	1.12231	7.68573e-06	8.96577e-05	58.2413	leucine rich repeat containing 42 [Source:HGNC Symbol;Acc:HGNC:28792]
ENSG00000116237.15	ICMT	protein_coding	585.891	0.671536	0.00429629	0.0182611	13.3017	5238.45	-1.24693	0.000200255	0.00149469	102.683	isoprenylcysteine carboxyl methyltransferase [Source:HGNC Symbol;Acc:HGNC:5350]
ENSG00000116260.16	QSOX1	protein_coding	55834.3	-0.596311	0.00140057	0.00772348	410.653	11859.2	2.50562	3.60229e-24	7.26511e-22	138.368	quiescin sulfhydryl oxidase 1 [Source:HGNC Symbol;Acc:HGNC:9756]
ENSG00000116285.12	ERRFI1	protein_coding	24181.1	-1.08756	1.57683e-09	1.22824e-07	471.383	4587.48	1.00511	1.22473e-05	0.000135747	86.9636	ERBB receptor feedback inhibitor 1 [Source:HGNC Symbol;Acc:HGNC:18185]
ENSG00000116288.12	PARK7	protein_coding	5034.83	-0.709817	0.000163148	0.00144278	151.347	5427.06	-0.935441	5.53129e-06	6.76304e-05	193.451	Parkinsonism associated deglycase [Source:HGNC Symbol;Acc:HGNC:16369]
ENSG00000116604.17	MEF2D	protein_coding	5257.54	-1.12431	2.05602e-07	6.82006e-06	67.5016	1582.38	0.88638	0.00148142	0.00807702	21.9503	myocyte enhancer factor 2D [Source:HGNC Symbol;Acc:HGNC:6997]
ENSG00000116668.12	SWT1	protein_coding	409.052	1.06978	0.000164428	0.00145043	11.0389	723.358	0.950109	7.39941e-05	0.000639658	14.2908	SWT1, RNA endoribonuclease homolog [Source:HGNC Symbol;Acc:HGNC:16785]
ENSG00000116698.20	SMG7	protein_coding	13447.4	-0.605583	0.00241323	0.0116961	114.596	4396.27	1.09337	1.12037e-06	1.68081e-05	43.8566	SMG7, nonsense mediated mRNA decay factor [Source:HGNC Symbol;Acc:HGNC:16792]
ENSG00000116717.11	GADD45A	protein_coding	2643.54	-1.3147	2.49973e-06	5.20469e-05	129.702	628.335	2.3122	5.45965e-10	1.92445e-08	40.7693	growth arrest and DNA damage inducible alpha [Source:HGNC Symbol;Acc:HGNC:4095]
ENSG00000116793.15	PHTF1	protein_coding	504.062	0.961266	0.000179492	0.00155577	8.91643	2008.23	-0.958626	0.00524427	0.0226776	29.598	putative homeodomain transcription factor 1 [Source:HGNC Symbol;Acc:HGNC:8939]
ENSG00000117054.13	ACADM	protein_coding	553.173	1.29734	3.58645e-06	6.90688e-05	14.5632	772.151	-0.678187	0.013397	0.0481596	13.7723	acyl-CoA dehydrogenase medium chain [Source:HGNC Symbol;Acc:HGNC:89]
ENSG00000117595.10	IRF6	protein_coding	3321.59	-0.72326	0.00014678	0.00133247	53.272	1875.64	0.81839	0.00161106	0.00867527	32.4964	interferon regulatory factor 6 [Source:HGNC Symbol;Acc:HGNC:6121]
ENSG00000117602.11	RCAN3	protein_coding	1343.37	0.63992	0.00130284	0.00726869	18.7464	845.109	0.960759	0.000103957	0.000860281	9.41985	RCAN family member 3 [Source:HGNC Symbol;Acc:HGNC:3042]
ENSG00000117625.13	RCOR3	protein_coding	2918.95	-0.619183	0.00508742	0.020714	24.2718	1703.7	0.631663	0.00408924	0.0185825	13.9312	REST corepressor 3 [Source:HGNC Symbol;Acc:HGNC:25594]
ENSG00000118508.4	RAB32	protein_coding	1894.81	-0.7632	0.000151136	0.00136129	120.84	1277.08	0.982511	0.00506794	0.0221008	105.554	RAB32, member RAS oncogene family [Source:HGNC Symbol;Acc:HGNC:9772]
ENSG00000118515.11	SGK1	protein_coding	138.455	1.59126	2.73417e-06	5.5279e-05	1.70336	1696.86	-1.36789	0.000246513	0.00178745	16.8328	serum/glucocorticoid regulated kinase 1 [Source:HGNC Symbol;Acc:HGNC:10810]
ENSG00000118600.11	TMEM5	protein_coding	719.239	0.604418	0.00401293	0.0173612	9.43948	1207.25	-1.13758	7.08317e-07	1.11929e-05	14.3584	ribitol xylosyltransferase 1 [Source:HGNC Symbol;Acc:HGNC:13530]
ENSG00000118689.14	FOXO3	protein_coding	12398.2	-0.839236	3.75015e-05	0.000450327	130.619	7006.31	0.745229	0.000299408	0.00209714	72.6621	forkhead box O3 [Source:HGNC Symbol;Acc:HGNC:3821]
ENSG00000118762.7	PKD2	protein_coding	612.147	0.79416	0.00119046	0.00677908	12.1169	1318.02	-1.09936	8.79995e-06	0.00010097	21.4049	polycystin 2, transient receptor potential cation channel [Source:HGNC Symbol;Acc:HGNC:9009]
ENSG00000118804.8	STBD1	protein_coding	350.347	-0.94629	0.000163133	0.00144278	7.90712	109.063	2.03727	4.22454e-06	5.36653e-05	3.75246	starch binding domain 1 [Source:HGNC Symbol;Acc:HGNC:24854]
ENSG00000118894.14	EEF2KMT	protein_coding	120.6	0.869064	0.00670081	0.0255386	4.4128	302.992	-2.17883	5.34341e-13	3.46137e-11	11.4559	eukaryotic elongation factor 2 lysine methyltransferase [Source:HGNC Symbol;Acc:HGNC:32221]
ENSG00000118985.15	ELL2	protein_coding	3224.29	-1.14617	3.20092e-09	2.28892e-07	35.7762	1172.81	2.18727	8.97146e-17	9.43595e-15	16.2727	elongation factor for RNA polymerase II 2 [Source:HGNC Symbol;Acc:HGNC:17064]
ENSG00000119242.8	CCDC92	protein_coding	1200.24	0.848333	5.60978e-05	0.00062463	15.1517	1004.5	0.661473	0.00847757	0.0331428	10.5159	coiled-coil domain containing 92 [Source:HGNC Symbol;Acc:HGNC:29563]
ENSG00000119681.11	LTBP2	protein_coding	799.626	1.50384	1.307e-12	3.19359e-10	10.4618	285.954	1.1598	5.01266e-05	0.000459525	2.67292	latent transforming growth factor beta binding protein 2 [Source:HGNC Symbol;Acc:HGNC:6715]
ENSG00000119686.9	FLVCR2	protein_coding	1972.37	-0.606146	0.00118612	0.00675718	29.8796	982.436	-0.662948	0.00534404	0.0230276	17.2271	feline leukemia virus subgroup C cellular receptor family member 2 [Source:HGNC Symbol;Acc:HGNC:20105]
ENSG00000119900.7	OGFRL1	protein_coding	4210.25	0.93683	1.84981e-07	6.24284e-06	49.3956	3928.39	0.867028	0.00143034	0.00784462	43.7824	opioid growth factor receptor like 1 [Source:HGNC Symbol;Acc:HGNC:21378]
ENSG00000119950.20	MXI1	protein_coding	8219.42	-0.600932	0.0016745	0.00886365	122.89	5061.57	2.83022	1.65372e-26	4.62168e-24	130.357	MAX interactor 1, dimerization protein [Source:HGNC Symbol;Acc:HGNC:7534]
ENSG00000120053.10	GOT1	protein_coding	1295.82	-0.648884	0.00115655	0.00662493	39.1413	1641.35	-0.748766	0.00062581	0.00390268	55.8002	glutamic-oxaloacetic transaminase 1 [Source:HGNC Symbol;Acc:HGNC:4432]
ENSG00000120063.9	GNA13	protein_coding	29300.2	-0.636698	0.00240137	0.0116513	421.664	22510.8	0.722829	0.00589299	0.024893	365.83	G protein subunit alpha 13 [Source:HGNC Symbol;Acc:HGNC:4381]
ENSG00000120149.8	MSX2	protein_coding	1683.38	-0.674591	0.00486304	0.0199742	59.2117	2021.69	-1.05469	1.03279e-06	1.57356e-05	78.7795	msh homeobox 2 [Source:HGNC Symbol;Acc:HGNC:7392]
ENSG00000120549.16	KIAA1217	protein_coding	3846.81	0.776084	0.000667076	0.00430601	37.5587	1681.13	2.25257	6.03567e-21	9.44606e-19	16.5519	KIAA1217 [Source:HGNC Symbol;Acc:HGNC:25428]
ENSG00000120708.16	TGFBI	protein_coding	20844.1	-0.785155	6.53578e-06	0.000112573	218.046	3002.95	2.94239	6.84101e-22	1.15371e-19	45.8901	transforming growth factor beta induced [Source:HGNC Symbol;Acc:HGNC:11771]
ENSG00000120800.4	UTP20	protein_coding	1196.76	1.03737	6.47806e-07	1.75511e-05	13.1252	2729.29	-1.15034	2.16697e-06	2.97699e-05	28.2242	UTP20, small subunit processome component [Source:HGNC Symbol;Acc:HGNC:17897]
ENSG00000120802.13	TMPO	protein_coding	9367.89	-0.724944	4.63432e-05	0.000533727	82.8947	19486.5	-0.94138	3.19425e-06	4.19672e-05	193.342	thymopoietin [Source:HGNC Symbol;Acc:HGNC:11875]
ENSG00000120832.9	MTERF2	protein_coding	868.787	0.836891	9.57288e-05	0.000954444	25.4451	956.743	-0.713718	0.00592691	0.0249942	21.5017	mitochondrial transcription termination factor 2 [Source:HGNC Symbol;Acc:HGNC:30779]
ENSG00000120837.7	NFYB	protein_coding	2212.1	-0.780661	0.000578617	0.00385774	35.5009	2316.94	-0.705028	0.0022858	0.011522	41.4203	nuclear transcription factor Y subunit beta [Source:HGNC Symbol;Acc:HGNC:7805]
ENSG00000120889.12	TNFRSF10B	protein_coding	9810.45	-0.675398	0.000454158	0.0031902	134.733	6264.23	1.31912	7.85071e-09	2.02083e-07	107.518	TNF receptor superfamily member 10b [Source:HGNC Symbol;Acc:HGNC:11905]
ENSG00000121101.15	TEX14	protein_coding	102.086	0.930056	0.00694774	0.0262674	2.46937	1304.68	-1.49839	7.56455e-10	2.52966e-08	24.6654	testis expressed 14, intercellular bridge forming factor [Source:HGNC Symbol;Acc:HGNC:11737]
ENSG00000121361.3	KCNJ8	protein_coding	76.7563	1.39715	0.000248862	0.00200469	4.47473	1548.49	-1.67172	0.0061891	0.0258547	75.4502	potassium voltage-gated channel subfamily J member 8 [Source:HGNC Symbol;Acc:HGNC:6269]
ENSG00000121966.6	CXCR4	protein_coding	3829.87	-1.11521	0.000110867	0.00107348	173.713	1511.16	1.67391	2.54167e-08	5.80194e-07	84.5504	C-X-C motif chemokine receptor 4 [Source:HGNC Symbol;Acc:HGNC:2561]
ENSG00000122386.10	ZNF205	protein_coding	1153.38	0.711843	0.000524929	0.00357772	48.7668	1014.18	0.612107	0.0119234	0.043789	31.5234	zinc finger protein 205 [Source:HGNC Symbol;Acc:HGNC:12996]
ENSG00000122641.9	INHBA	protein_coding	500.938	1.42839	9.61248e-06	0.000153771	8.81583	666.927	-0.617854	0.011664	0.0430534	7.31174	inhibin subunit beta A [Source:HGNC Symbol;Acc:HGNC:6066]
ENSG00000122694.15	GLIPR2	protein_coding	57.3474	0.973451	0.0140257	0.0452539	2.60305	63.9253	-2.24108	9.6408e-06	0.000109525	3.35555	GLI pathogenesis related 2 [Source:HGNC Symbol;Acc:HGNC:18007]
ENSG00000122783.16	C7orf49	protein_coding	663.133	0.7035	0.0089318	0.0319218	14.1941	1729.21	-1.21083	2.14531e-06	2.95139e-05	33.7555	cell cycle regulator of NHEJ [Source:HGNC Symbol;Acc:HGNC:22432]
ENSG00000122884.12	P4HA1	protein_coding	21140.9	-0.648877	0.00306119	0.0140885	543.426	13224.5	2.72677	2.41088e-35	1.09684e-32	465.061	prolyl 4-hydroxylase subunit alpha 1 [Source:HGNC Symbol;Acc:HGNC:8546]
ENSG00000122912.14	SLC25A16	protein_coding	423.875	0.625115	0.00851534	0.0308433	5.56833	737.968	-0.737058	0.00220172	0.0111876	7.83909	solute carrier family 25 member 16 [Source:HGNC Symbol;Acc:HGNC:10986]
ENSG00000123358.19	NR4A1	protein_coding	1989.66	-0.922187	0.000199066	0.00167388	23.5049	566.871	1.21519	4.09672e-05	0.000384568	7.25886	nuclear receptor subfamily 4 group A member 1 [Source:HGNC Symbol;Acc:HGNC:7980]
ENSG00000123427.15	METTL21B	protein_coding	2666.75	-0.670077	0.000438896	0.00311058	60.0095	1005.53	2.12756	4.54812e-16	4.37989e-14	33.3291	EEF1A lysine methyltransferase 3 [Source:HGNC Symbol;Acc:HGNC:24936]
ENSG00000123595.6	RAB9A	protein_coding	4407.3	-1.01043	8.5234e-05	0.000870195	200.903	3057.87	0.963322	2.93087e-05	0.000287401	117.745	RAB9A, member RAS oncogene family [Source:HGNC Symbol;Acc:HGNC:9792]
ENSG00000123609.10	NMI	protein_coding	193.967	1.36875	1.64046e-06	3.71725e-05	7.07698	214.022	-1.81863	8.76334e-09	2.23225e-07	6.52154	N-myc and STAT interactor [Source:HGNC Symbol;Acc:HGNC:7854]
ENSG00000123737.12	EXOSC9	protein_coding	1120.92	-0.597416	0.00616388	0.0240276	17.1357	1450.16	-0.811384	0.000710964	0.00434236	26.019	exosome component 9 [Source:HGNC Symbol;Acc:HGNC:9137]
ENSG00000124097.7	HMGB1P1	processed_pseudogene	37.6392	2.00679	1.78191e-05	0.000251138	10.2805	56.2674	-2.02779	4.88023e-05	0.000449491	11.9841	high mobility group box 1 pseudogene 1 [Source:HGNC Symbol;Acc:HGNC:4993]
ENSG00000124120.10	TTPAL	protein_coding	457.717	1.4861	8.04985e-09	4.8987e-07	8.61181	1253.63	-1.43099	1.55305e-06	2.24223e-05	19.9531	alpha tocopherol transfer protein like [Source:HGNC Symbol;Acc:HGNC:16114]
ENSG00000124172.9	ATP5E	protein_coding	13878.9	-0.88929	5.51267e-05	0.000616176	222.927	13137.9	-0.725313	0.000401667	0.00268643	215.568	ATP synthase F1 subunit epsilon [Source:HGNC Symbol;Acc:HGNC:838]
ENSG00000124216.3	SNAI1	protein_coding	156.107	1.02451	0.00124708	0.00701001	10.8769	153.301	2.22885	4.46724e-07	7.43767e-06	14.2162	snail family transcriptional repressor 1 [Source:HGNC Symbol;Acc:HGNC:11128]
ENSG00000124635.8	HIST1H2BJ	protein_coding	383.356	-1.12033	0.00149414	0.00811383	44.9827	5410.21	-0.938336	0.000873879	0.00518995	600.422	histone cluster 1 H2B family member j [Source:HGNC Symbol;Acc:HGNC:4761]
ENSG00000124641.14	MED20	protein_coding	1851.4	-0.680724	0.00379944	0.0166147	44.8537	1424.72	-0.687252	0.00179437	0.00949761	34.7559	mediator complex subunit 20 [Source:HGNC Symbol;Acc:HGNC:16840]
ENSG00000124749.16	COL21A1	protein_coding	153.48	0.844443	0.00535626	0.0215526	2.54763	983.575	-1.35341	1.54546e-05	0.000165393	16.6152	collagen type XXI alpha 1 chain [Source:HGNC Symbol;Acc:HGNC:17025]
ENSG00000124762.13	CDKN1A	protein_coding	12855.5	-0.732878	0.000198583	0.00167113	307.234	6671.28	1.06825	4.97284e-06	6.1572e-05	191.507	cyclin dependent kinase inhibitor 1A [Source:HGNC Symbol;Acc:HGNC:1784]
ENSG00000125247.15	TMTC4	protein_coding	249.943	1.1166	0.000445974	0.00315001	5.13127	538.167	-0.871265	0.00290648	0.0141055	7.84452	transmembrane and tetratricopeptide repeat containing 4 [Source:HGNC Symbol;Acc:HGNC:25904]
ENSG00000125352.5	RNF113A	protein_coding	4030.1	-0.936921	6.49342e-05	0.000698934	253.958	1998.61	1.01954	7.10882e-05	0.000618069	128.878	ring finger protein 113A [Source:HGNC Symbol;Acc:HGNC:12974]
ENSG00000125375.14	ATP5S	protein_coding	1440.62	0.801944	0.000324046	0.00245397	14.1928	1647	-0.656678	0.00329311	0.0156253	12.2571	distal membrane arm assembly complex 2 like [Source:HGNC Symbol;Acc:HGNC:18799]
ENSG00000125398.5	SOX9	protein_coding	8287.02	1.23653	2.23954e-10	2.33985e-08	246.636	2106.91	3.92213	1.52527e-29	5.05744e-27	86.285	SRY-box 9 [Source:HGNC Symbol;Acc:HGNC:11204]
ENSG00000125430.8	HS3ST3B1	protein_coding	607.444	-0.787998	0.000500031	0.00343892	10.2509	1591.38	-1.1216	2.35658e-06	3.19486e-05	27.0296	heparan sulfate-glucosamine 3-sulfotransferase 3B1 [Source:HGNC Symbol;Acc:HGNC:5198]
ENSG00000125459.14	MSTO1	protein_coding	132.582	1.18473	0.000292809	0.00227065	3.84996	131.581	-1.46965	0.000182956	0.00138829	3.48739	misato 1, mitochondrial distribution and morphology regulator [Source:HGNC Symbol;Acc:HGNC:29678]
ENSG00000125520.13	SLC2A4RG	protein_coding	7664.12	-0.628309	0.000650803	0.00422756	241.706	4114.85	-0.613854	0.00737274	0.0297449	156.672	SLC2A4 regulator [Source:HGNC Symbol;Acc:HGNC:15930]
ENSG00000125629.14	INSIG2	protein_coding	6725.43	-0.833967	6.89581e-06	0.000117613	128.906	2630.2	3.54629	1.19234e-57	1.66612e-54	74.6617	insulin induced gene 2 [Source:HGNC Symbol;Acc:HGNC:20452]
ENSG00000125733.17	TRIP10	protein_coding	4020.14	-1.11255	5.43219e-06	9.78131e-05	90.5151	2126.03	2.11377	2.74939e-20	4.07471e-18	52.294	thyroid hormone receptor interactor 10 [Source:HGNC Symbol;Acc:HGNC:12304]
[truncated: 1,123 more rows]

## Sheet: siMBNL2_Hypoxia_DEGs
GENCODE_gene_id	gene_name	gene_type	baseMean.siMBNL2	log2FoldChange.siMBNL2	pvalue.siMBNL2	padj.siMBNL2	maxTPM.siMBNL2	baseMean.A549	log2FoldChange.A549	pvalue.A549	padj.A549	maxTPM.A549	baseMean.MCF-7	log2FoldChange.MCF-7	pvalue.MCF-7	padj.MCF-7	maxTPM.MCF-7	mean_log2FoldChange_hypoxia	description
[truncated: 351 more rows]
