# Supplementary material
Source: HighWire-hosted journal article supplement (doi:10.1101/rna.073353.119)
Supplement: Supplemental_Tab_S8.xlsx [file Supplemental_Tab_S8.xlsx]

## Sheet: legend
Supplementary Table 8. Hypoxia response genes overlap with genes correlating with MBNL2 expression in patient samples.
FDR	false discovery rate
padj	adjusted p value
HRGs	hypoxia response genes

## Sheet: BRCA_HRGs_correlation_to_MBNL2
gene_name	GENCODE_gene_id	gene_type	Pearson correlation cofficient	P-value	FDR	MCF7.baseMean	MCF7.log2FoldChange	MCF7.padj
ZNF292	ENSG00000188994.12	protein_coding	0.494048	5.0156e-68	2.48349e-65	18189.6	2.3415	2.31004e-22
LPP	ENSG00000145012.12	protein_coding	0.485812	1.62884e-65	5.99134e-63	8760.62	1.18879	6.00412e-07
DST	ENSG00000151914.18	protein_coding	0.474642	3.23838e-62	7.86863e-60	19493.3	0.679135	0.0228885
MEF2A	ENSG00000068305.17	protein_coding	0.465086	1.72522e-59	2.67596e-57	6109.95	0.942718	5.26179e-05
ANO6	ENSG00000177119.15	protein_coding	0.454122	1.82088e-56	1.87536e-54	8695.64	1.6801	5.36981e-10
UTRN	ENSG00000152818.18	protein_coding	0.449033	4.23552e-55	3.68433e-53	12438.5	0.673222	0.0106627
DOCK4	ENSG00000128512.19	protein_coding	0.441497	4.05493e-53	3.00018e-51	125.126	0.925342	0.0493639
KLHL24	ENSG00000114796.15	protein_coding	0.436485	7.91453e-52	5.17216e-50	10087.5	1.69263	9.46582e-10
HECA	ENSG00000112406.4	protein_coding	0.432538	7.93282e-51	4.49899e-49	4148.84	1.04959	0.000136648
HBP1	ENSG00000105856.13	protein_coding	0.422749	2.11692e-48	9.43018e-47	9693.99	0.81652	0.00142732
TCP11L2	ENSG00000166046.10	protein_coding	0.408681	4.7336e-45	1.5389e-43	2595.99	2.52139	6.13951e-27
KLF7	ENSG00000118263.14	protein_coding	0.405743	2.26296e-44	6.88732e-43	1677.9	1.7003	5.04083e-08
FAM63B	ENSG00000128923.10	protein_coding	0.397858	1.39672e-42	3.55362e-41	1852.19	0.986529	0.00535774
DIXDC1	ENSG00000150764.13	protein_coding	0.397391	1.77698e-42	4.49446e-41	455.758	0.648768	0.0483018
KDM3A	ENSG00000115548.16	protein_coding	0.39698	2.19541e-42	5.47747e-41	8921.69	2.3224	5.04879e-24
RP11-159G9.5	ENSG00000229729.6	lincRNA	0.396323	3.07669e-42	7.48759e-41	604.536	0.858162	0.00299738
ZNF654	ENSG00000175105.5	protein_coding	0.391041	4.51286e-41	1.00866e-39	3158.01	1.13975	1.16042e-06
C7orf60	ENSG00000164603.11	protein_coding	0.390172	6.98684e-41	1.53496e-39	2664.68	1.35001	8.40858e-09
FAM13A	ENSG00000138640.14	protein_coding	0.387976	2.09736e-40	4.44103e-39	1864.16	5.69876	4.14772e-81
AGO4	ENSG00000134698.10	protein_coding	0.386458	4.45975e-40	9.11346e-39	2922.09	1.52976	2.82974e-11
FMNL2	ENSG00000157827.19	protein_coding	0.381631	4.79102e-39	8.81136e-38	851.738	1.79676	1.09716e-05
KLF11	ENSG00000172059.10	protein_coding	0.381293	5.64698e-39	1.0312e-37	2842.8	0.793227	0.0390284
HIVEP2	ENSG00000010818.8	protein_coding	0.379388	1.42419e-38	2.51164e-37	3319.05	1.2024	3.85906e-07
EGFR	ENSG00000146648.15	protein_coding	0.379068	1.66277e-38	2.92039e-37	1120.93	2.12942	6.45785e-14
CDC42EP3	ENSG00000163171.7	protein_coding	0.376226	6.52329e-38	1.09066e-36	119.506	2.40186	1.27508e-05
FOXN3	ENSG00000053254.15	protein_coding	0.376125	6.84523e-38	1.143e-36	7588.35	2.41757	5.84325e-22
TSC22D2	ENSG00000196428.12	protein_coding	0.374862	1.25072e-37	2.03562e-36	7772.07	1.52391	2.08899e-10
SCAPER	ENSG00000140386.12	protein_coding	0.374372	1.57942e-37	2.53851e-36	2877.22	0.947909	0.00107191
RAPGEF4	ENSG00000091428.17	protein_coding	0.370379	1.04063e-36	1.57799e-35	200.335	2.73824	3.79737e-10
ESYT2	ENSG00000117868.15	protein_coding	0.369098	1.89463e-36	2.81332e-35	16414.6	0.828334	0.00234946
RIOK3	ENSG00000101782.14	protein_coding	0.362141	4.68344e-35	6.22878e-34	4708.02	1.05316	0.000391472
YPEL2	ENSG00000175155.8	protein_coding	0.359338	1.6673e-34	2.10853e-33	5299.49	1.68068	4.23838e-14
GBE1	ENSG00000114480.12	protein_coding	0.358681	2.24216e-34	2.81067e-33	8660.61	2.39235	1.34473e-14
FOXO3	ENSG00000118689.14	protein_coding	0.351144	6.35627e-33	7.22247e-32	7006.31	0.745229	0.00209714
SLC25A36	ENSG00000114120.11	protein_coding	0.343061	2.07792e-31	2.0818e-30	8318.07	0.838146	0.00493619
SETBP1	ENSG00000152217.16	protein_coding	0.342904	2.22192e-31	2.21744e-30	1249.41	0.906759	0.0075223
KIAA1715	ENSG00000144320.13	protein_coding	0.33922	1.05161e-30	1.00583e-29	8542.99	1.58013	3.64031e-11
SLC17A5	ENSG00000119899.12	protein_coding	0.337289	2.35609e-30	2.19006e-29	1183.29	2.01292	2.14959e-13
CREBRF	ENSG00000164463.12	protein_coding	0.336605	3.13162e-30	2.88386e-29	5718.16	1.73458	2.60272e-08
RP11-282O18.3	ENSG00000235423.8	antisense	0.330092	4.53024e-29	3.84966e-28	346.398	1.48908	0.00243373
CDK19	ENSG00000155111.14	protein_coding	0.329197	6.50704e-29	5.46099e-28	5832.72	1.03249	2.49376e-05
KDM7A	ENSG00000006459.10	protein_coding	0.328276	9.43352e-29	7.83025e-28	5758.29	1.37913	2.4389e-07
ABCA1	ENSG00000165029.15	protein_coding	0.322867	8.14422e-28	6.35446e-27	1272.03	0.964678	0.0338252
CD109	ENSG00000156535.13	protein_coding	0.321322	1.49534e-27	1.14658e-26	951.372	2.34714	7.46572e-18
PGM2L1	ENSG00000165434.7	protein_coding	0.320937	1.73864e-27	1.32523e-26	4033.59	2.6807	3.79488e-23
OSMR	ENSG00000145623.12	protein_coding	0.319043	3.6406e-27	2.70869e-26	544.904	1.0554	0.0309109
DPYSL2	ENSG00000092964.16	protein_coding	0.318021	5.41274e-27	3.9751e-26	7682.76	1.37814	9.5269e-07
TRPC1	ENSG00000144935.14	protein_coding	0.317945	5.57418e-27	4.089e-26	827.584	0.761125	0.00949824
SAMD4A	ENSG00000020577.13	protein_coding	0.315027	1.71519e-26	1.20729e-25	1692.87	1.60865	9.10023e-07
TRIO	ENSG00000038382.17	protein_coding	0.314828	1.85045e-26	1.29753e-25	8711.4	0.726021	0.00244113
GABARAPL1	ENSG00000139112.10	protein_coding	0.312649	4.24507e-26	2.90543e-25	317.03	2.67964	5.30029e-16
PNRC1	ENSG00000146278.10	protein_coding	0.312478	4.53023e-26	3.09401e-25	15639.6	2.12455	3.76181e-21
FAM160A1	ENSG00000164142.15	protein_coding	0.307883	2.54806e-25	1.65592e-24	1758.5	1.38943	6.723e-06
DARS	ENSG00000115866.10	protein_coding	0.305533	6.09122e-25	3.86107e-24	10484.6	1.44611	2.0116e-07
LAMC2	ENSG00000058085.14	protein_coding	0.303866	1.12496e-24	6.96958e-24	532.557	1.5239	2.28566e-05
RBMS2	ENSG00000076067.11	protein_coding	0.302986	1.55277e-24	9.51014e-24	559.256	1.0842	0.00232739
LOX	ENSG00000113083.12	protein_coding	0.300486	3.85502e-24	2.30086e-23	161.456	4.42486	8.05844e-17
TES	ENSG00000135269.17	protein_coding	0.299302	5.91081e-24	3.46836e-23	4409.98	0.826477	0.00314149
MALT1	ENSG00000172175.12	protein_coding	0.298872	6.90183e-24	4.03149e-23	1297.4	0.649713	0.0315475
ITGB8	ENSG00000105855.9	protein_coding	0.295733	2.11986e-23	1.19908e-22	680.131	1.61639	7.83394e-08
ERRFI1	ENSG00000116285.12	protein_coding	0.29453	3.24703e-23	1.81512e-22	4587.48	1.00511	0.000135747
CLIP4	ENSG00000115295.19	protein_coding	0.293766	4.25226e-23	2.36065e-22	339.444	3.09495	2.81393e-22
SLC6A6	ENSG00000131389.16	protein_coding	0.292923	5.72094e-23	3.15019e-22	9181.1	1.71525	4.0776e-09
PAM	ENSG00000145730.20	protein_coding	0.287036	4.41725e-22	2.29398e-21	8818.61	2.54747	1.80548e-30
MITF	ENSG00000187098.14	protein_coding	0.286075	6.13788e-22	3.16203e-21	232.674	1.57519	0.000504073
SFMBT2	ENSG00000198879.11	protein_coding	0.285291	8.02032e-22	4.08601e-21	2163.64	0.632096	0.03726
PPP1R3B	ENSG00000173281.4	protein_coding	0.284659	9.9459e-22	5.0391e-21	2567.88	1.31938	0.000130315
PDK1	ENSG00000152256.13	protein_coding	0.284219	1.15483e-21	5.83258e-21	7377.96	4.05656	6.39672e-69
NAV1	ENSG00000134369.15	protein_coding	0.28295	1.77409e-21	8.85257e-21	614.595	2.27224	1.81135e-17
INSIG2	ENSG00000125629.14	protein_coding	0.280088	4.63384e-21	2.25287e-20	2630.2	3.54629	1.66612e-54
PAG1	ENSG00000076641.4	protein_coding	0.279942	4.86533e-21	2.35829e-20	699.304	1.14086	4.17404e-05
ZNF277	ENSG00000198839.9	protein_coding	0.278223	8.61386e-21	4.10418e-20	3336.51	1.07511	7.1374e-05
SLC38A2	ENSG00000134294.13	protein_coding	0.274494	2.93178e-20	1.34463e-19	99029.4	1.22317	0.00054082
EPAS1	ENSG00000116016.13	protein_coding	0.273937	3.51444e-20	1.60671e-19	2967.76	2.98191	4.49041e-39
MEX3B	ENSG00000183496.5	protein_coding	0.272174	6.22219e-20	2.7989e-19	930.929	0.726298	0.0242073
AHNAK	ENSG00000124942.13	protein_coding	0.270308	1.13391e-19	5.00959e-19	158522	1.21085	5.94905e-05
CNKSR3	ENSG00000153721.17	protein_coding	0.270225	1.1642e-19	5.13987e-19	647.409	0.711991	0.0155905
ZNF264	ENSG00000083844.10	protein_coding	0.265492	5.22089e-19	2.21025e-18	216.675	0.989118	0.0377918
ARHGAP29	ENSG00000137962.12	protein_coding	0.265175	5.76701e-19	2.43265e-18	1050.6	0.920261	0.00110365
KIF3C	ENSG00000084731.13	protein_coding	0.264047	8.20645e-19	3.42797e-18	1102.87	1.29279	0.00104979
ATP1B1	ENSG00000143153.12	protein_coding	0.263403	1.00283e-18	4.15794e-18	19598.1	1.71673	3.21224e-07
KDM5B	ENSG00000117139.16	protein_coding	0.259876	2.97955e-18	1.19684e-17	39470.6	1.30271	4.47093e-09
ERO1A	ENSG00000197930.12	protein_coding	0.25857	4.44097e-18	1.76569e-17	25719	2.98683	2.25822e-28
VLDLR	ENSG00000147852.15	protein_coding	0.256164	9.20716e-18	3.58756e-17	4170.23	0.687349	0.00752545
DENND5A	ENSG00000184014.7	protein_coding	0.25614	9.27452e-18	3.61271e-17	3518.07	0.964957	0.000831392
YEATS2	ENSG00000163872.15	protein_coding	0.255088	1.27266e-17	4.90986e-17	9987.12	2.35558	6.06851e-20
MAF	ENSG00000178573.6	protein_coding	0.252071	3.12925e-17	1.17658e-16	267.054	2.27871	3.30707e-08
APP	ENSG00000142192.20	protein_coding	0.251684	3.50831e-17	1.31411e-16	16710.3	0.923027	8.68823e-05
ZFP90	ENSG00000184939.15	protein_coding	0.251132	4.13037e-17	1.53816e-16	4922.84	0.633584	0.0119561
FBXO32	ENSG00000156804.7	protein_coding	0.250566	4.87967e-17	1.81092e-16	834.687	1.98224	1.83551e-12
ZFP36L1	ENSG00000185650.9	protein_coding	0.245538	2.10707e-16	7.47901e-16	4743.03	0.587065	0.0272907
ZNF160	ENSG00000170949.17	protein_coding	0.245528	2.11336e-16	7.49928e-16	8890.61	1.63502	1.578e-07
PDE5A	ENSG00000138735.15	protein_coding	0.245447	2.16327e-16	7.66792e-16	1896.67	0.934462	0.0238046
PLEKHA2	ENSG00000169499.14	protein_coding	0.244659	2.71238e-16	9.56429e-16	3191.49	1.87031	4.43337e-12
GPR155	ENSG00000163328.13	protein_coding	0.244497	2.84132e-16	1.00025e-15	496.928	2.81366	4.46804e-17
KLF6	ENSG00000067082.14	protein_coding	0.240575	8.65073e-16	2.92846e-15	2216.86	1.34271	1.41003e-05
ITGB4	ENSG00000132470.13	protein_coding	0.240175	9.68037e-16	3.265e-15	21546.6	0.803456	0.0172416
DAAM1	ENSG00000100592.15	protein_coding	0.239399	1.20311e-15	4.02727e-15	10116.2	0.959603	0.000576055
RND3	ENSG00000115963.13	protein_coding	0.237239	2.1955e-15	7.22148e-15	4732.36	1.61518	2.9682e-09
LRP1	ENSG00000123384.13	protein_coding	0.235283	3.76536e-15	1.2195e-14	6497.92	4.77525	2.52562e-52
SRPX	ENSG00000101955.14	protein_coding	0.235026	4.04127e-15	1.30689e-14	30.9891	1.5013	0.033867
DSC2	ENSG00000134755.14	protein_coding	0.233712	5.78852e-15	1.84962e-14	341.481	2.364	6.98577e-14
CAPN2	ENSG00000162909.17	protein_coding	0.233041	6.94788e-15	2.20857e-14	1600.59	0.957331	0.00128592
FOSL2	ENSG00000075426.11	protein_coding	0.231812	9.6939e-15	3.05581e-14	16794.1	1.08214	3.24145e-05
LAMB3	ENSG00000196878.12	protein_coding	0.227847	2.80204e-14	8.53405e-14	1055.53	3.32641	1.29182e-29
AHNAK2	ENSG00000185567.6	protein_coding	0.227644	2.95765e-14	8.98884e-14	1139.53	1.99256	0.00671357
MYH9	ENSG00000100345.20	protein_coding	0.224321	7.08464e-14	2.09914e-13	25302.9	0.782328	0.00856391
SUN1	ENSG00000164828.17	protein_coding	0.224166	7.37727e-14	2.18133e-13	12473	0.919496	0.000865974
FUT11	ENSG00000196968.10	protein_coding	0.219243	2.62147e-13	7.50142e-13	6245.48	3.55791	1.76577e-39
LTBP2	ENSG00000119681.11	protein_coding	0.218082	3.52041e-13	9.98718e-13	285.954	1.1598	0.000459525
TMEM45A	ENSG00000181458.10	protein_coding	0.21764	3.93634e-13	1.11084e-12	463.003	5.68536	7.32075e-46
CYTH3	ENSG00000008256.15	protein_coding	0.21737	4.21353e-13	1.18646e-12	1315.88	0.854579	0.00466357
PLOD2	ENSG00000152952.11	protein_coding	0.216695	4.99478e-13	1.3985e-12	25935	1.82354	4.92907e-13
INSR	ENSG00000171105.13	protein_coding	0.21662	5.08915e-13	1.42337e-12	4280.83	0.891973	0.000479192
NUAK1	ENSG00000074590.13	protein_coding	0.215662	6.47029e-13	1.7991e-12	1273.05	1.19636	4.02452e-06
ARFGEF3	ENSG00000112379.8	protein_coding	0.214252	9.19495e-13	2.52778e-12	19383.9	1.89067	6.07393e-14
SGPP2	ENSG00000163082.9	protein_coding	0.214055	9.65606e-13	2.65001e-12	66.1655	1.70759	0.00140498
GS1-358P8.4	ENSG00000260822.1	sense_overlapping	0.213427	1.12832e-12	3.08867e-12	3382.43	0.898797	0.00191266
OPN3	ENSG00000054277.12	protein_coding	0.212493	1.42055e-12	3.8607e-12	1419.18	1.07691	2.32882e-05
ITPR1	ENSG00000150995.18	protein_coding	0.211479	1.82255e-12	4.92e-12	1479.07	1.74045	5.95532e-13
CAMK1D	ENSG00000183049.12	protein_coding	0.211438	1.84085e-12	4.96629e-12	467.082	1.59498	6.67333e-08
ZNF571	ENSG00000180479.13	protein_coding	0.208636	3.63914e-12	9.63798e-12	551.834	0.789924	0.0229463
PXDN	ENSG00000130508.10	protein_coding	0.208481	3.77787e-12	9.99102e-12	8551.51	1.60671	1.90178e-10
INADL	ENSG00000132849.19	protein_coding	0.205572	7.58293e-12	1.96226e-11	11470.3	0.600115	0.0145702
NTN4	ENSG00000074527.11	protein_coding	0.202381	1.6095e-11	4.07967e-11	604.843	1.75328	1.55285e-08
BNIP3L	ENSG00000104765.14	protein_coding	0.200525	2.47929e-11	6.21463e-11	32102.2	2.9641	2.80832e-41
SPOCK1	ENSG00000152377.13	protein_coding	0.200267	2.6321e-11	6.58102e-11	216.077	1.46977	0.000383425
RRAGD	ENSG00000025039.14	protein_coding	0.199306	3.28535e-11	8.16518e-11	2276.74	3.98252	4.80457e-25
FYN	ENSG00000010810.17	protein_coding	0.199118	3.43081e-11	8.51354e-11	96.963	1.2108	0.0349192
TIPARP	ENSG00000163659.12	protein_coding	0.197151	5.38048e-11	1.31639e-10	6134.43	0.761515	0.0185002
NEK6	ENSG00000119408.16	protein_coding	0.192132	1.66127e-10	3.94228e-10	2581.31	1.1105	5.54901e-05
ICAM1	ENSG00000090339.8	protein_coding	0.19204	1.69545e-10	4.01754e-10	310.697	1.32136	0.00132482
SLC45A3	ENSG00000158715.5	protein_coding	0.191075	2.09821e-10	4.93467e-10	527.878	2.12888	1.04883e-08
TANC2	ENSG00000170921.14	protein_coding	0.189431	3.00998e-10	7.00605e-10	42186.6	1.68807	8.32136e-14
NATD1	ENSG00000274180.1	protein_coding	0.189258	3.1256e-10	7.2699e-10	657.544	0.661372	0.032727
GPNMB	ENSG00000136235.15	protein_coding	0.189103	3.23288e-10	7.51537e-10	457.562	1.88589	0.0145207
TCAF2	ENSG00000170379.19	protein_coding	0.184184	9.31531e-10	2.10174e-09	685.999	1.57899	1.14053e-08
ADAM9	ENSG00000168615.11	protein_coding	0.183676	1.03722e-09	2.33406e-09	6562.81	0.678447	0.00941378
NEBL	ENSG00000078114.18	protein_coding	0.18352	1.07208e-09	2.40998e-09	13427.8	1.10758	5.1983e-06
CCNG2	ENSG00000138764.13	protein_coding	0.183233	1.13908e-09	2.55524e-09	7080.46	2.04321	2.39075e-18
GSN	ENSG00000148180.17	protein_coding	0.183124	1.16573e-09	2.6132e-09	19811.2	0.902469	0.000146112
TNFRSF11A	ENSG00000141655.15	protein_coding	0.182779	1.25347e-09	2.80597e-09	441.21	1.51843	1.23989e-06
TNFAIP8	ENSG00000145779.7	protein_coding	0.182753	1.26032e-09	2.82032e-09	570.692	1.5257	5.39707e-07
WSB1	ENSG00000109046.14	protein_coding	0.18073	1.92513e-09	4.25771e-09	32152.2	2.07557	0.00202802
SNX25	ENSG00000109762.15	protein_coding	0.179979	2.24996e-09	4.95061e-09	786.781	1.52384	2.32544e-08
OLFML2A	ENSG00000185585.19	protein_coding	0.179729	2.36945e-09	5.20817e-09	687.151	2.69192	1.73807e-15
GPRC5B	ENSG00000167191.11	protein_coding	0.178854	2.83908e-09	6.21793e-09	188.479	1.42553	0.000211193
ARL4C	ENSG00000188042.7	protein_coding	0.178853	2.83946e-09	6.21793e-09	612.993	0.845019	0.00351754
GFPT2	ENSG00000131459.12	protein_coding	0.173774	7.96237e-09	1.6921e-08	225.394	1.34573	0.000188962
ZSWIM4	ENSG00000132003.9	protein_coding	0.173199	8.9312e-09	1.89361e-08	707.1	1.53991	6.57924e-06
FBLIM1	ENSG00000162458.12	protein_coding	0.172456	1.03528e-08	2.18531e-08	384.092	1.64376	2.81055e-05
MXD1	ENSG00000059728.10	protein_coding	0.170783	1.44089e-08	3.01724e-08	4713.05	1.38675	2.71145e-05
AMPD3	ENSG00000133805.15	protein_coding	0.16725	2.86504e-08	5.87707e-08	469.958	3.88886	9.54499e-40
FLNA	ENSG00000196924.14	protein_coding	0.166956	3.0314e-08	6.21239e-08	102361	0.771421	0.0101846
RAB6B	ENSG00000154917.10	protein_coding	0.163151	6.24509e-08	1.25311e-07	209.34	1.03948	0.00638493
VEGFA	ENSG00000112715.20	protein_coding	0.162479	7.08366e-08	1.41585e-07	13789.2	2.66617	1.18121e-12
YPEL5	ENSG00000119801.12	protein_coding	0.160046	1.11281e-07	2.19897e-07	5575.79	0.962797	6.50193e-05
HK2	ENSG00000159399.9	protein_coding	0.159855	1.15271e-07	2.27468e-07	11592.4	2.74906	1.14109e-22
ITGA5	ENSG00000161638.10	protein_coding	0.159406	1.25178e-07	2.46526e-07	2094.03	2.46679	6.34057e-18
RNF24	ENSG00000101236.16	protein_coding	0.15794	1.6362e-07	3.19594e-07	3273.66	1.92891	1.02108e-17
TMBIM1	ENSG00000135926.12	protein_coding	0.157517	1.76666e-07	3.44241e-07	151.198	2.05627	1.72068e-07
ZNF514	ENSG00000144026.11	protein_coding	0.155705	2.44961e-07	4.73021e-07	2236.09	0.686068	0.00868228
GNS	ENSG00000135677.10	protein_coding	0.155476	2.55239e-07	4.92202e-07	19584.6	0.650112	0.0117243
DSP	ENSG00000096696.13	protein_coding	0.15489	2.83394e-07	5.44296e-07	103812	1.80302	3.3011e-17
NREP	ENSG00000134986.13	protein_coding	0.154215	3.19572e-07	6.11864e-07	2058.42	2.12259	1.26344e-15
OPTN	ENSG00000123240.16	protein_coding	0.1536	3.56396e-07	6.79941e-07	1571.32	1.36633	5.7816e-06
ZNF395	ENSG00000186918.13	protein_coding	0.153541	3.601e-07	6.86702e-07	7517.66	2.43662	2.1754e-28
AK4	ENSG00000162433.14	protein_coding	0.152416	4.39102e-07	8.32915e-07	4153.83	2.77377	8.37033e-23
ZNF836	ENSG00000196267.12	protein_coding	0.148176	9.15088e-07	1.70194e-06	525.947	1.1812	7.90455e-05
PFKFB3	ENSG00000170525.18	protein_coding	0.147153	1.08926e-06	2.01048e-06	10764.4	3.34976	7.65824e-33
CP	ENSG00000047457.13	protein_coding	0.146452	1.22647e-06	2.25533e-06	93.6217	2.92858	5.37387e-10
C1orf116	ENSG00000182795.12	protein_coding	0.144399	1.73046e-06	3.14927e-06	120.385	3.77644	1.16139e-15
DENND3	ENSG00000105339.10	protein_coding	0.144305	1.75783e-06	3.19638e-06	740.239	1.9216	9.43402e-07
OTUD1	ENSG00000165312.6	protein_coding	0.143535	1.99748e-06	3.61682e-06	1688.69	1.53989	1.00502e-07
STEAP3	ENSG00000115107.19	protein_coding	0.142871	2.22907e-06	4.02257e-06	1547.11	1.10394	0.000118956
CCL28	ENSG00000151882.11	protein_coding	0.142424	2.39942e-06	4.32211e-06	1419.57	1.52318	2.03786e-05
IGFBP3	ENSG00000146674.14	protein_coding	0.142203	2.48815e-06	4.47442e-06	1249.84	2.67403	8.53695e-21
BACE2	ENSG00000182240.15	protein_coding	0.1419	2.61471e-06	4.6935e-06	1540.11	1.819	2.92068e-10
C10orf10	ENSG00000165507.8	protein_coding	0.139427	3.90755e-06	6.93682e-06	61.0714	1.46815	0.0125356
SDC2	ENSG00000169439.11	protein_coding	0.138113	4.82325e-06	8.51193e-06	411.491	0.899095	0.0350593
DHX32	ENSG00000089876.11	protein_coding	0.137863	5.01988e-06	8.84923e-06	4133.42	1.34142	1.45873e-08
PTGS1	ENSG00000095303.14	protein_coding	0.136745	5.99397e-06	1.05074e-05	50.3347	3.29635	5.16973e-08
LINC-PINT	ENSG00000231721.6	antisense	0.136506	6.22441e-06	1.09039e-05	590.224	1.26048	2.30699e-05
PTRF	ENSG00000177469.12	protein_coding	0.136182	6.55063e-06	1.14551e-05	1211.78	1.93271	1.00965e-07
TRPV4	ENSG00000111199.10	protein_coding	0.135102	7.75932e-06	1.349e-05	350.356	0.793388	0.041689
VTCN1	ENSG00000134258.16	protein_coding	0.133687	9.66937e-06	1.67025e-05	451.561	3.96742	1.79737e-27
MAP3K8	ENSG00000107968.9	protein_coding	0.131823	1.28749e-05	2.2065e-05	619.707	1.80732	7.2028e-11
SPNS2	ENSG00000183018.8	protein_coding	0.130278	1.62774e-05	2.76641e-05	1030.61	4.05559	1.26122e-43
RAB9A	ENSG00000123595.6	protein_coding	0.129476	1.83661e-05	3.10826e-05	3057.87	0.963322	0.000287401
PDE9A	ENSG00000160191.17	protein_coding	0.12903	1.96366e-05	3.31326e-05	406.074	0.814786	0.0279976
LOXL2	ENSG00000134013.15	protein_coding	0.128742	2.04985e-05	3.45326e-05	1484.43	5.70016	6.90783e-75
PDK3	ENSG00000067992.12	protein_coding	0.128003	2.28829e-05	3.83537e-05	3494.49	0.941444	0.00032015
ALOX5	ENSG00000012779.10	protein_coding	0.126792	2.73648e-05	4.55867e-05	46.4426	4.20502	5.22895e-08
OXTR	ENSG00000180914.10	protein_coding	0.12162	5.77225e-05	9.35447e-05	1073.7	1.09318	0.00806399
PIM1	ENSG00000137193.13	protein_coding	0.121618	5.77378e-05	9.35578e-05	2364.74	1.68103	1.90542e-07
MXI1	ENSG00000119950.20	protein_coding	0.117643	0.000100459	0.000159472	5061.57	2.83022	4.62168e-24
PPP1R3C	ENSG00000119938.8	protein_coding	0.116084	0.000124249	0.00019574	1695.66	1.86984	3.21165e-06
MGLL	ENSG00000074416.13	protein_coding	0.115891	0.000127541	0.000200803	2087.98	1.16264	0.00125103
TGFBI	ENSG00000120708.16	protein_coding	0.115333	0.000137517	0.000216139	3002.95	2.94239	1.15371e-19
PGM1	ENSG00000079739.15	protein_coding	0.114228	0.000159476	0.000249352	2030.16	4.14196	1.38716e-66
CALCOCO1	ENSG00000012822.15	protein_coding	0.112744	0.000194196	0.000301214	6467.8	0.750617	0.0028531
C4orf3	ENSG00000164096.12	protein_coding	0.112203	0.00020853	0.000322593	13472	2.5383	3.74897e-23
CLIP2	ENSG00000106665.15	protein_coding	0.107799	0.000368021	0.000557859	405.894	1.28446	0.000749773
EFNB3	ENSG00000108947.4	protein_coding	0.107372	0.000388418	0.000587326	989.322	1.3876	6.93921e-05
STC1	ENSG00000159167.11	protein_coding	0.106537	0.000431392	0.000649865	13574.1	0.883387	0.000148833
PTAFR	ENSG00000169403.11	protein_coding	0.102482	0.000710772	0.00105372	134.272	2.2596	1.61051e-05
TMEM159	ENSG00000011638.10	protein_coding	0.101886	0.000763827	0.00112938	3155.77	1.29458	1.6079e-07
SMAD7	ENSG00000101665.8	protein_coding	0.101184	0.00083094	0.00122481	1009.19	0.637517	0.0341907
DUSP1	ENSG00000120129.5	protein_coding	0.100417	0.000910445	0.00133726	1435.25	0.857099	0.00203482
CTSK	ENSG00000143387.12	protein_coding	0.0974229	0.0012934	0.00187239	686.628	0.918721	0.00268643
SFXN3	ENSG00000107819.13	protein_coding	0.0960985	0.00150615	0.0021665	3043.66	3.14087	3.95705e-28
SYDE1	ENSG00000105137.12	protein_coding	0.0950362	0.00169956	0.00243302	234.562	2.79577	3.79072e-14
MAFF	ENSG00000185022.11	protein_coding	0.0947774	0.00175001	0.0025019	595.942	3.52274	3.23596e-21
DPYSL4	ENSG00000151640.12	protein_coding	0.0926006	0.0022321	0.00316546	832.821	2.98833	6.0846e-17
CXCR4	ENSG00000121966.6	protein_coding	0.0925331	0.00224881	0.00318776	1511.16	1.67391	5.80194e-07
BMF	ENSG00000104081.13	protein_coding	0.0896486	0.00308033	0.00431467	2037.85	1.64555	2.37133e-10
LDHAP4	ENSG00000214110.3	processed_pseudogene	0.0891403	0.00325302	0.00454223	876.247	2.98754	1.43407e-23
NDRG1	ENSG00000104419.14	protein_coding	0.0888696	0.00334853	0.00467053	53348.9	5.00526	1.01735e-60
ZBTB25	ENSG00000089775.11	protein_coding	0.0877408	0.00377499	0.00524376	4706.14	1.47416	1.19619e-07
MRC2	ENSG00000011028.13	protein_coding	0.0865119	0.0042948	0.00593635	1797.89	1.66456	6.04021e-12
EGLN3	ENSG00000129521.13	protein_coding	0.0864208	0.00433578	0.00598915	3089.8	3.40116	2.1461e-34
NGEF	ENSG00000066248.14	protein_coding	0.0856948	0.00467545	0.00643624	481.628	1.47356	0.00244388
KRT80	ENSG00000167767.13	protein_coding	0.0855707	0.00473583	0.00651449	15495.2	1.72513	3.50432e-06
CTIF	ENSG00000134030.13	protein_coding	0.0844129	0.0053343	0.00729408	813.285	0.923594	0.00128803
GPR157	ENSG00000180758.11	protein_coding	0.0809741	0.00753472	0.0101552	2696.95	1.12376	5.51534e-05
SDK1	ENSG00000146555.18	protein_coding	0.0798931	0.00837788	0.0112492	4457.19	1.05368	7.94385e-06
RP5-1187M17.10	ENSG00000088899.14	protein_coding	0.0791284	0.00902426	0.012063	278.504	1.99247	7.49889e-07
SH3BP2	ENSG00000087266.15	protein_coding	0.0769054	0.0111629	0.0147882	4708.29	1.21953	1.40141e-06
CSRNP1	ENSG00000144655.14	protein_coding	0.0741047	0.0144899	0.0190117	1234.92	0.795453	0.00637452
PLIN2	ENSG00000147872.9	protein_coding	0.0735555	0.0152362	0.0199401	694.539	2.66955	1.13003e-23
PPP1R18	ENSG00000146112.11	protein_coding	0.0731938	0.0157459	0.0205675	1705.03	1.75924	1.67943e-10
CTD-3252C9.4	ENSG00000267519.3	lincRNA	0.0713507	0.0185832	0.0241072	907.182	1.48622	5.66714e-09
SMYD2	ENSG00000143499.13	protein_coding	0.0685532	0.023742	0.0304589	1565.79	0.627699	0.0407838
PFKP	ENSG00000067057.16	protein_coding	0.0680268	0.0248405	0.0318048	25190	2.71515	5.25313e-22
TNFRSF10C	ENSG00000173535.13	protein_coding	0.0680131	0.0248698	0.0318359	769.713	1.90335	1.70075e-09
QSOX1	ENSG00000116260.16	protein_coding	0.0660759	0.0293035	0.037233	11859.2	2.50562	7.26511e-22
FHL2	ENSG00000115641.18	protein_coding	0.0632223	0.0370633	0.0465605	189.667	1.82474	2.08952e-05
RNF122	ENSG00000133874.1	protein_coding	0.0599897	0.0478996	0.0594199	210.512	1.64606	0.000153718
ZNF821	ENSG00000102984.14	protein_coding	0.0598327	0.0484875	0.0600971	804.447	1.35894	4.24113e-07
DRAM1	ENSG00000136048.13	protein_coding	0.0580833	0.0554564	0.0681962	2741.61	1.96526	4.40098e-06
P4HA1	ENSG00000122884.12	protein_coding	0.0560822	0.0644302	0.0786754	13224.5	2.72677	1.09684e-32
FAM57A	ENSG00000167695.14	protein_coding	0.054363	0.0730657	0.0887484	727.362	1.21159	1.08005e-05
FOXO4	ENSG00000184481.16	protein_coding	0.0539779	0.0751242	0.0911373	473.711	1.48515	2.10935e-06
PSAP	ENSG00000197746.13	protein_coding	0.0535685	0.0773648	0.0937054	25069.4	0.780801	0.00121686
MYADM	ENSG00000179820.15	protein_coding	0.0469115	0.121998	0.143894	2945.08	0.837416	0.0181218
PDGFB	ENSG00000100311.16	protein_coding	0.0436029	0.150643	0.17543	1526.99	1.06774	0.000133978
DUSP10	ENSG00000143507.17	protein_coding	0.0428265	0.158053	0.183528	509.916	2.20237	1.18917e-08
ADM	ENSG00000148926.9	protein_coding	0.0409608	0.176984	0.204202	1119.28	5.53081	2.35241e-55
PCDH1	ENSG00000156453.13	protein_coding	0.0405155	0.181742	0.20933	3414.76	0.608162	0.035044
NPEPPS	ENSG00000141279.15	protein_coding	0.039424	0.193806	0.222356	10001.8	0.977518	2.58023e-05
IL18BP	ENSG00000137496.17	protein_coding	0.037467	0.216884	0.247007	1061.95	0.72142	0.00996229
MT1X	ENSG00000187193.8	protein_coding	0.0358992	0.236749	0.267948	352.606	2.27004	1.58092e-07
ARHGEF37	ENSG00000183111.11	protein_coding	0.0352117	0.245854	0.277424	1263.16	0.683559	0.0405813
ALDOC	ENSG00000109107.13	protein_coding	0.0345914	0.254278	0.286327	11862.6	4.68032	8.9676e-49
DAPK2	ENSG00000035664.11	protein_coding	0.0324562	0.284793	0.318035	2182.74	3.7218	2.08177e-49
PDE8B	ENSG00000113231.13	protein_coding	0.0305378	0.314242	0.348214	94.1468	1.04176	0.0454172
PRRG4	ENSG00000135378.3	protein_coding	0.0280397	0.355485	0.390621	1424.29	1.55383	2.48298e-06
EFEMP2	ENSG00000172638.12	protein_coding	0.0276759	0.361764	0.397046	553.689	3.21647	3.66059e-19
FAM219A	ENSG00000164970.14	protein_coding	0.0259911	0.391737	0.427536	1576.64	2.03548	1.16505e-09
JUN	ENSG00000177606.6	protein_coding	0.0241603	0.42596	0.461574	5452.7	1.43525	3.91673e-07
LRRC3	ENSG00000160233.7	protein_coding	0.0220963	0.466556	0.501875	424.658	1.59885	0.000205574
ALS2CL	ENSG00000178038.16	protein_coding	0.0218014	0.472527	0.507577	457.366	1.11702	0.00219266
ARID5A	ENSG00000196843.15	protein_coding	0.0212444	0.483918	0.518947	966.156	2.78611	2.05776e-14
PYGL	ENSG00000100504.16	protein_coding	0.021087	0.487163	0.522166	2730.93	2.30872	1.06075e-08
NUDT13	ENSG00000166321.13	protein_coding	0.018922	0.53297	0.567955	300.83	1.93817	1.26705e-09
TMEM45B	ENSG00000151715.7	protein_coding	0.0163337	0.590451	0.623429	1085.91	2.56657	1.44547e-13
PGAM1	ENSG00000171314.8	protein_coding	0.0158082	0.602462	0.634654	2376.16	1.37887	3.89012e-08
C2orf15	ENSG00000273045.5	protein_coding	0.0150639	0.619656	0.651167	877.326	0.723235	0.013333
PGK1	ENSG00000102144.13	protein_coding	0.0145449	0.631771	0.662762	104215	3.08236	2.15397e-33
FAM129B	ENSG00000136830.11	protein_coding	0.0133752	0.659437	0.689315	16000	1.06673	1.12574e-05
MFNG	ENSG00000100060.17	protein_coding	0.0105622	0.72784	0.753354	22.7993	1.65519	0.0346166
COL6A1	ENSG00000142156.14	protein_coding	0.0103097	0.734097	0.75922	750.38	1.35875	3.13825e-07
GPR160	ENSG00000173890.16	protein_coding	0.00979667	0.746863	0.771555	3071.07	1.24284	0.000431191
ZYX	ENSG00000159840.15	protein_coding	0.00903904	0.765845	0.78939	1412.78	1.10705	4.36319e-05
NRSN2-AS1	ENSG00000225377.5	antisense	0.00872984	0.773632	0.796333	784.495	1.61281	1.75515e-07
ANKRD37	ENSG00000186352.8	protein_coding	0.00822404	0.786421	0.808269	425.057	2.25964	0.00216216
COL7A1	ENSG00000114270.15	protein_coding	0.00731203	0.809623	0.829401	919.612	1.09466	7.60158e-05
P4HA2	ENSG00000072682.18	protein_coding	0.00728943	0.810201	0.829729	4927.38	2.84891	5.12133e-25
HLA-E	ENSG00000204592.8	protein_coding	0.00641675	0.832564	0.850264	10346.8	1.1169	9.48572e-05
PPP1R15A	ENSG00000087074.7	protein_coding	0.00533511	0.860469	0.875975	3494.6	1.40985	0.000105435
RAB20	ENSG00000139832.4	protein_coding	0.0053221	0.860806	0.876118	810.283	1.02956	0.00192849
RAB32	ENSG00000118508.4	protein_coding	0.00227612	0.940222	0.946915	1277.08	0.982511	0.0221008
RP11-465N4.5	ENSG00000273478.1	antisense	-0.000935602	0.975409	0.977992	118.369	1.68976	0.00170202
EHD2	ENSG00000024422.11	protein_coding	-0.00104972	0.972411	0.97535	1181.54	2.66794	1.6833e-14
NKILA	ENSG00000278709.1	antisense	-0.00230807	0.939384	0.946368	1152.57	1.07397	3.6591e-05
SEMA4B	ENSG00000185033.14	protein_coding	-0.00333168	0.912593	0.922493	3597.65	1.4888	8.45167e-10
ANGPTL4	ENSG00000167772.11	protein_coding	-0.00465201	0.878185	0.891155	1213.68	3.77474	1.34377e-39
TMEM38A	ENSG00000072954.6	protein_coding	-0.00554699	0.854988	0.870816	403.328	0.979634	0.00519016
PAQR5	ENSG00000137819.13	protein_coding	-0.00583518	0.847544	0.863713	324.889	1.16467	0.000362429
LDHA	ENSG00000134333.13	protein_coding	-0.00585807	0.846953	0.863316	75137.7	3.13912	2.17185e-35
HK1	ENSG00000156515.21	protein_coding	-0.00683038	0.821946	0.840821	23344.9	1.11939	1.09594e-05
ZNF274	ENSG00000171606.17	protein_coding	-0.00990291	0.744214	0.769126	2743.14	0.75407	0.0062146
AC093673.5	ENSG00000232533.1	antisense	-0.0105418	0.728344	0.753694	232.635	1.29793	0.00037796
DDR1	ENSG00000204580.11	protein_coding	-0.0105509	0.728119	0.753521	19075.7	0.647776	0.0133483
SLC29A4	ENSG00000164638.10	protein_coding	-0.0124156	0.682487	0.710754	1299.5	2.59003	1.00116e-14
C2orf82	ENSG00000182600.9	protein_coding	-0.0130868	0.666332	0.695956	124.603	1.06528	0.0191435
PKM	ENSG00000067225.17	protein_coding	-0.0135546	0.655161	0.685178	125259	1.95242	3.43361e-12
TMEM74B	ENSG00000125895.5	protein_coding	-0.01362	0.653606	0.683719	145.142	5.88817	3.18998e-08
BNIP3	ENSG00000176171.11	protein_coding	-0.0141337	0.641441	0.671976	22193.4	4.13843	9.8412e-59
MAFK	ENSG00000198517.9	protein_coding	-0.0147189	0.627698	0.658919	2395.54	0.787565	0.00314149
PHC2	ENSG00000134686.16	protein_coding	-0.0217639	0.473288	0.508225	1618.07	0.621451	0.0199165
COL6A2	ENSG00000142173.14	protein_coding	-0.0231175	0.446207	0.481474	871.41	0.771754	0.0156721
TTLL3	ENSG00000214021.15	protein_coding	-0.0233963	0.440742	0.476056	1133.99	1.04965	0.00230546
RP11-164P12.5	ENSG00000278978.1	TEC	-0.0238439	0.432046	0.467408	173.299	1.09754	0.026132
BFSP1	ENSG00000125864.11	protein_coding	-0.0239388	0.430215	0.465675	235.538	1.02631	0.00995156
EFNA1	ENSG00000169242.11	protein_coding	-0.0252356	0.405652	0.441302	2495.43	0.618747	0.048236
JUNB	ENSG00000171223.5	protein_coding	-0.0270861	0.372089	0.407405	7227.26	0.848502	0.00103601
S100A6	ENSG00000197956.9	protein_coding	-0.0282177	0.352437	0.387437	4847.41	1.78096	5.40428e-12
CHRD	ENSG00000090539.15	protein_coding	-0.0286176	0.345653	0.380499	107.415	1.41955	0.0288489
ENO1	ENSG00000074800.13	protein_coding	-0.0292374	0.335302	0.369737	176357	1.91781	1.96161e-13
FANK1	ENSG00000203780.10	protein_coding	-0.031292	0.302434	0.3362	547.657	2.55544	1.03881e-20
HLA-B	ENSG00000234745.9	protein_coding	-0.0335988	0.268169	0.300837	3932.67	3.24502	9.70673e-38
MIR193BHG	ENSG00000262454.2	lincRNA	-0.036542	0.228455	0.259244	713.137	1.18147	0.000184919
PPP1R13L	ENSG00000104881.14	protein_coding	-0.0375339	0.216064	0.246174	2034.96	1.5934	8.28321e-07
S100A4	ENSG00000196154.11	protein_coding	-0.0378472	0.212252	0.242158	776.484	3.81341	3.13491e-18
KCTD11	ENSG00000213859.4	protein_coding	-0.038021	0.21016	0.239836	3227.21	1.77905	5.90172e-14
C15orf48	ENSG00000166920.10	protein_coding	-0.0393074	0.195127	0.223732	38.4049	1.31289	0.0465042
LINC00963	ENSG00000204054.12	processed_transcript	-0.0394371	0.193657	0.222205	9342.32	1.38217	3.22138e-06
WISP2	ENSG00000064205.10	protein_coding	-0.040307	0.184003	0.211826	6685.04	2.14821	1.65749e-10
BHLHE40	ENSG00000134107.4	protein_coding	-0.0416973	0.169319	0.195903	6822.66	4.07771	7.20736e-70
NPC2	ENSG00000119655.8	protein_coding	-0.042001	0.166231	0.192469	4285.56	0.774871	0.00468919
PPP1R3E	ENSG00000235194.8	protein_coding	-0.0428543	0.157783	0.183264	2171.55	1.69544	3.37767e-12
TPI1P1	ENSG00000226415.1	processed_pseudogene	-0.0429494	0.156862	0.182244	117.529	1.49707	0.000492049
ZNF250	ENSG00000196150.13	protein_coding	-0.047026	0.121089	0.142874	2045.35	0.903828	0.000275207
TNIP1	ENSG00000145901.14	protein_coding	-0.0483354	0.111063	0.131818	8602.26	2.02931	2.25848e-20
PAQR7	ENSG00000182749.5	protein_coding	-0.0503763	0.096754	0.11586	605.105	1.00333	0.0240005
TTC9	ENSG00000133985.2	protein_coding	-0.05141	0.0900902	0.108283	1440.74	1.53646	1.11542e-06
EFNA3	ENSG00000143590.13	protein_coding	-0.0514224	0.0900128	0.1082	933.026	1.90174	3.85714e-11
SCARB1	ENSG00000073060.15	protein_coding	-0.0525068	0.0834282	0.100661	4900.62	2.1248	8.43123e-18
PDLIM2	ENSG00000120913.23	protein_coding	-0.0530485	0.080288	0.0970634	544.567	1.32281	5.20274e-06
RP11-465N4.4	ENSG00000234678.1	antisense	-0.0554518	0.0674938	0.0822291	469.6	2.92837	4.87211e-16
ENO2	ENSG00000111674.8	protein_coding	-0.0609197	0.044539	0.0554594	11673.9	4.16192	9.60154e-37
EEF1A2	ENSG00000101210.10	protein_coding	-0.0621215	0.0404921	0.0506407	40572.2	1.31075	7.68419e-09
SAP30	ENSG00000164105.3	protein_coding	-0.0625376	0.0391659	0.0490631	1677.57	1.04347	4.13208e-05
TGFB1	ENSG00000105329.9	protein_coding	-0.0630238	0.0376626	0.0472535	655.841	0.956129	0.00136773
TBC1D9B	ENSG00000197226.12	protein_coding	-0.0676896	0.025567	0.0326634	14197.7	0.775065	0.00183839
GALNT18	ENSG00000110328.5	protein_coding	-0.0677664	0.0253999	0.0324532	338.636	3.23199	3.09053e-22
SHC2	ENSG00000129946.10	protein_coding	-0.0692804	0.0222939	0.0286811	447.552	2.00203	7.66708e-10
RELT	ENSG00000054967.12	protein_coding	-0.0698128	0.0212829	0.0274462	1141.26	1.50491	1.6587e-05
VAT1	ENSG00000108828.15	protein_coding	-0.0715421	0.0182691	0.0237141	8501.68	1.68344	4.2279e-10
HLA-C	ENSG00000204525.15	protein_coding	-0.0767275	0.0113521	0.0150233	5135.39	3.04602	8.77534e-29
GPI	ENSG00000105220.14	protein_coding	-0.0772763	0.0107776	0.0142939	63400.4	2.86172	9.26798e-21
TBC1D22A	ENSG00000054611.13	protein_coding	-0.0788901	0.00923465	0.0123263	1168.75	1.12517	9.27901e-05
C8orf58	ENSG00000241852.9	protein_coding	-0.0799021	0.00837055	0.0112405	1223.04	3.28188	6.23301e-24
MEX3D	ENSG00000181588.16	protein_coding	-0.0824754	0.00648982	0.008804	3811.74	1.58482	4.90026e-08
TBC1D25	ENSG00000068354.15	protein_coding	-0.0847619	0.00514708	0.00705081	756.887	0.7608	0.00847942
PTK6	ENSG00000101213.6	protein_coding	-0.0849649	0.00504096	0.00691427	627.722	0.962728	0.0122789
PPP2R5B	ENSG00000068971.13	protein_coding	-0.0882646	0.00357131	0.00496834	858.752	1.83052	1.28096e-11
LINC00957	ENSG00000235314.1	lincRNA	-0.0906189	0.00277365	0.00389952	144.547	1.63224	0.00162448
FBXO2	ENSG00000116661.9	protein_coding	-0.0916066	0.0024903	0.00351459	562.427	2.36724	1.02376e-07
DDIT4	ENSG00000168209.4	protein_coding	-0.0927473	0.00219613	0.00311651	24443.5	3.79304	1.14064e-72
LPIN3	ENSG00000132793.11	protein_coding	-0.0934227	0.0020373	0.00289847	6052.06	1.64121	2.52536e-08
C11orf80	ENSG00000173715.15	protein_coding	-0.0944409	0.00181768	0.0025965	2886.49	0.981451	0.000122807
CIART	ENSG00000159208.15	protein_coding	-0.0948084	0.00174391	0.00249401	2451.32	2.32697	2.23805e-23
MAPT	ENSG00000186868.15	protein_coding	-0.0956168	0.00159119	0.00228397	3580.17	0.837796	0.0048157
RPL17P50	ENSG00000213700.3	processed_pseudogene	-0.0961019	0.00150555	0.00216613	64.6552	2.37755	5.24021e-06
SEC14L2	ENSG00000100003.17	protein_coding	-0.0969097	0.00137231	0.00198284	79.9048	1.37604	0.0143851
C16orf45	ENSG00000166780.10	protein_coding	-0.0975086	0.00128063	0.00185474	1495.87	0.937856	0.0217186
TRAFD1	ENSG00000135148.11	protein_coding	-0.0978318	0.00123354	0.00178916	8252.79	0.767102	0.0100026
IGFBP5	ENSG00000115461.4	protein_coding	-0.102564	0.000703751	0.00104403	12891.8	1.45538	5.39707e-07
STC2	ENSG00000113739.10	protein_coding	-0.103426	0.000633764	0.000943355	30591.5	1.3956	1.14532e-09
IER3	ENSG00000137331.11	protein_coding	-0.106915	0.00041144	0.000620824	13421.2	1.38372	7.2529e-05
BRSK1	ENSG00000160469.16	protein_coding	-0.107004	0.000406848	0.000614184	112.605	1.7621	0.000149415
ANKRD9	ENSG00000156381.8	protein_coding	-0.108743	0.000326392	0.000496921	3838.86	1.13493	0.000557498
ANKZF1	ENSG00000163516.13	protein_coding	-0.108849	0.000321981	0.000490496	9682.6	2.19342	2.55987e-23
JAG2	ENSG00000184916.8	protein_coding	-0.11201	0.00021388	0.000330512	1768.12	0.756414	0.00389251
MAPK8IP3	ENSG00000138834.12	protein_coding	-0.11308	0.000185771	0.000288495	5012.03	0.925344	0.000192959
CACNB3	ENSG00000167535.7	protein_coding	-0.113356	0.000179092	0.000278458	2077.64	1.00538	0.00222961
PFKFB4	ENSG00000114268.11	protein_coding	-0.113949	0.000165533	0.000258311	5419.66	4.59117	1.62569e-59
GYS1	ENSG00000104812.14	protein_coding	-0.114206	0.000159943	0.000250013	5522.81	1.53316	1.49382e-07
IGFBP6	ENSG00000167779.7	protein_coding	-0.117508	0.000102337	0.000162333	255.649	3.43754	3.40971e-23
SPINT1	ENSG00000166145.14	protein_coding	-0.11767	0.00010009	0.000158905	5713.84	1.02676	0.000115834
GAPDHP1	ENSG00000228232.1	processed_pseudogene	-0.123695	4.29332e-05	7.02672e-05	120.225	2.79843	4.24113e-07
OSER1-AS1	ENSG00000223891.5	lincRNA	-0.124203	3.99064e-05	6.55049e-05	460.144	1.50544	6.79435e-05
TSC22D3	ENSG00000157514.16	protein_coding	-0.127532	2.45368e-05	4.10243e-05	7510.43	0.670024	0.0412045
UBC	ENSG00000150991.14	protein_coding	-0.130721	1.52225e-05	2.59329e-05	59807.4	1.26677	5.87741e-06
LINC00152	ENSG00000222041.10	lincRNA	-0.131699	1.31211e-05	2.24719e-05	644.107	1.66287	5.36701e-09
DUSP5	ENSG00000138166.5	protein_coding	-0.135941	6.80376e-06	1.188e-05	428.737	1.55361	0.000282791
PLXNA3	ENSG00000130827.6	protein_coding	-0.139394	3.92785e-06	6.97094e-06	4518.14	0.797282	0.00399541
PCED1B	ENSG00000179715.12	protein_coding	-0.143714	1.93917e-06	3.51419e-06	2075.95	0.656196	0.0221926
KDM4B	ENSG00000127663.14	protein_coding	-0.143786	1.91623e-06	3.47312e-06	2470.51	0.91399	0.000230145
ST6GALNAC6	ENSG00000160408.14	protein_coding	-0.144631	1.66487e-06	3.03462e-06	2245.73	1.42078	2.97693e-08
FBXL8	ENSG00000135722.8	protein_coding	-0.146213	1.27687e-06	2.34534e-06	563.056	0.988873	0.00574005
SH3D21	ENSG00000214193.9	protein_coding	-0.147384	1.04733e-06	1.93643e-06	1688.36	2.49197	1.23705e-12
RP11-268J15.5	ENSG00000116883.8	antisense	-0.14985	6.86477e-07	1.28736e-06	450.039	2.949	3.30517e-16
DHRS13	ENSG00000167536.13	protein_coding	-0.150268	6.38618e-07	1.20075e-06	1827.47	1.1341	7.61698e-05
HILPDA	ENSG00000135245.9	protein_coding	-0.150305	6.34499e-07	1.19318e-06	13517	3.49997	3.70961e-28
DYRK1B	ENSG00000105204.13	protein_coding	-0.15605	2.30236e-07	4.45858e-07	1732.56	1.10591	1.19462e-05
FSTL3	ENSG00000070404.9	protein_coding	-0.156454	2.14106e-07	4.1537e-07	1390.8	1.48106	0.000339625
CEBPD	ENSG00000221869.4	protein_coding	-0.163145	6.25259e-08	1.25422e-07	508.851	0.794698	0.0266099
SIRT2	ENSG00000068903.19	protein_coding	-0.164938	4.45691e-08	9.03452e-08	2478.2	0.76363	0.0114938
PHF1	ENSG00000112511.17	protein_coding	-0.170522	1.51657e-08	3.17158e-08	2786.51	1.62406	1.28703e-09
TMEM102	ENSG00000181284.2	protein_coding	-0.170957	1.39227e-08	2.91877e-08	948.643	1.16261	0.000554951
MPI	ENSG00000178802.17	protein_coding	-0.171361	1.28585e-08	2.69861e-08	5125.83	1.62556	4.77345e-09
GADD45B	ENSG00000099860.8	protein_coding	-0.172681	9.90089e-09	2.09335e-08	3766.95	0.855182	0.0101065
SHB	ENSG00000107338.9	protein_coding	-0.176798	4.32479e-09	9.34654e-09	758.819	0.715726	0.0210622
ANO9	ENSG00000185101.12	protein_coding	-0.176939	4.20243e-09	9.0882e-09	1410.94	0.869221	0.00807702
FAM134A	ENSG00000144567.10	protein_coding	-0.177075	4.08731e-09	8.84427e-09	8336.23	0.90108	0.000613236
NOL3	ENSG00000140939.14	protein_coding	-0.177778	3.54096e-09	7.69779e-09	3409.63	1.85106	2.52536e-08
ACTG1	ENSG00000184009.9	protein_coding	-0.180328	2.09301e-09	4.62026e-09	240197	1.32004	5.84494e-06
MIR210HG	ENSG00000247095.2	lincRNA	-0.186974	5.12907e-10	1.17935e-09	481.753	3.0363	2.56047e-22
HSD11B1L	ENSG00000167733.13	protein_coding	-0.191695	1.82981e-10	4.32396e-10	97.1133	1.83757	4.67193e-05
HSF4	ENSG00000102878.16	protein_coding	-0.196054	6.90202e-11	1.67559e-10	2725.93	2.60357	5.80738e-16
TMSB10	ENSG00000034510.5	protein_coding	-0.196356	6.44557e-11	1.56774e-10	54863.5	1.98396	6.84281e-12
DNAJB2	ENSG00000135924.15	protein_coding	-0.203339	1.28564e-11	3.2749e-11	3241.64	0.958687	0.000473464
RASSF1	ENSG00000068028.17	protein_coding	-0.204241	1.03956e-11	2.66439e-11	1209.77	1.30973	9.88111e-05
GAPDH	ENSG00000111640.14	protein_coding	-0.207361	4.94603e-12	1.29474e-11	889009	3.34207	6.94152e-26
SNTA1	ENSG00000101400.5	protein_coding	-0.208802	3.49597e-12	9.27027e-12	430.261	3.07513	1.06708e-25
WDR54	ENSG00000005448.16	protein_coding	-0.216587	5.13123e-13	1.43451e-12	2808.31	1.35179	1.42947e-06
N4BP3	ENSG00000145911.5	protein_coding	-0.218561	3.11784e-13	8.87248e-13	7253.65	1.0948	4.57487e-06
RP11-496I9.1	ENSG00000254815.5	antisense	-0.21917	2.67075e-13	7.63224e-13	700.251	1.82805	2.9688e-08
FAM162A	ENSG00000114023.15	protein_coding	-0.221088	1.63569e-13	4.74382e-13	5761.39	2.89756	5.92232e-35
SNHG7	ENSG00000233016.6	antisense	-0.22526	5.54282e-14	1.65411e-13	9474.09	1.15834	2.71766e-06
B4GALNT4	ENSG00000182272.11	protein_coding	-0.227596	2.99554e-14	9.10185e-14	2071.02	1.0431	2.26876e-05
SPAG4	ENSG00000061656.9	protein_coding	-0.22801	2.68382e-14	8.1895e-14	1087.15	2.75841	6.62926e-21
HOMER3	ENSG00000051128.18	protein_coding	-0.228733	2.21454e-14	6.79781e-14	808.541	1.63101	2.88555e-06
NAB2	ENSG00000166886.12	protein_coding	-0.229837	1.64883e-14	5.09775e-14	6011.47	0.72925	0.0201975
NCKIPSD	ENSG00000213672.7	protein_coding	-0.231081	1.18082e-14	3.69515e-14	1808.81	1.44371	3.35446e-07
TPI1	ENSG00000111669.14	protein_coding	-0.232558	7.92057e-15	2.50847e-14	42118.4	1.5099	1.24016e-10
CARHSP1	ENSG00000153048.10	protein_coding	-0.237397	2.10134e-15	6.91883e-15	5290.39	0.850518	0.00185209
DAPK3	ENSG00000167657.11	protein_coding	-0.24021	9.58538e-16	3.23381e-15	2344.87	1.1948	0.00122182
LRRC75B	ENSG00000178026.12	protein_coding	-0.240472	8.90397e-16	3.01181e-15	298.191	1.51973	0.000183039
TSC22D4	ENSG00000166925.8	protein_coding	-0.24605	1.81832e-16	6.48449e-16	2173.09	0.587432	0.0430534
VKORC1	ENSG00000167397.14	protein_coding	-0.270604	1.03115e-19	4.56816e-19	2293.18	1.8649	2.13679e-09
FBXO44	ENSG00000132879.13	protein_coding	-0.270793	9.70563e-20	4.30863e-19	1185.56	1.64422	2.46375e-10
CLDN3	ENSG00000165215.6	protein_coding	-0.290836	1.18733e-22	6.38502e-22	8085.18	0.803557	0.0167121
ZNF358	ENSG00000198816.5	protein_coding	-0.296424	1.65785e-23	9.46065e-23	652.795	1.20364	0.000192796
RBCK1	ENSG00000125826.19	protein_coding	-0.321183	1.57911e-27	1.20937e-26	5310.19	1.14179	6.29183e-05
MIF	ENSG00000240972.1	protein_coding	-0.331387	2.67684e-29	2.30667e-28	1238.29	1.19837	4.39943e-05
HCFC1R1	ENSG00000103145.10	protein_coding	-0.340107	7.24614e-31	7.00877e-30	1880.98	1.05014	0.000167277
ZNF581	ENSG00000171425.9	protein_coding	-0.342647	2.47799e-31	2.46725e-30	2130.95	1.67861	1.37977e-10
BCKDK	ENSG00000103507.13	protein_coding	-0.343935	1.43258e-31	1.4591e-30	3084.64	1.03386	0.000413515
ALDOA	ENSG00000149925.16	protein_coding	-0.352284	3.85464e-33	4.44666e-32	336558	2.83183	5.85183e-23
DPCD	ENSG00000166171.12	protein_coding	-0.355143	1.08969e-33	1.30257e-32	1308.06	1.87706	6.55243e-12
RASSF7	ENSG00000099849.14	protein_coding	-0.360195	1.1326e-34	1.45375e-33	1975.69	1.02689	6.04774e-05
MFSD10	ENSG00000109736.14	protein_coding	-0.374464	1.51188e-37	2.43603e-36	2457.69	0.665854	0.0162248
OGFR	ENSG00000060491.16	protein_coding	-0.374487	1.49543e-37	2.41254e-36	8493.08	0.737718	0.0107775
AC007566.10	ENSG00000244055.1	antisense	NA	NA	NA	68.2584	1.22302	0.022097
AC084117.3	ENSG00000256006.1	sense_intronic	NA	NA	NA	81.6595	3.41878	9.71046e-11
AC093818.1	ENSG00000225205.5	antisense	NA	NA	NA	44.1607	1.41493	0.0238496
ADAM20	ENSG00000134007.3	protein_coding	NA	NA	NA	85.4747	2.02147	0.00200639
ADGRF4	ENSG00000153294.11	protein_coding	NA	NA	NA	364.789	3.06758	4.11088e-20
AK9	ENSG00000155085.15	protein_coding	NA	NA	NA	868.83	0.944216	0.000925694
AL162759.1	ENSG00000235269.1	lincRNA	NA	NA	NA	25.3163	2.69894	0.000179356
ALPK3	ENSG00000136383.6	protein_coding	NA	NA	NA	643.916	1.57364	0.047992
ANKS1B	ENSG00000185046.18	protein_coding	NA	NA	NA	1098.45	1.19831	8.07615e-06
AP000695.4	ENSG00000233818.1	antisense	NA	NA	NA	10.3122	2.3287	0.00162448
AP001062.7	ENSG00000184441.4	antisense	NA	NA	NA	432.26	1.17459	0.00379651
B3GNT4	ENSG00000176383.8	protein_coding	NA	NA	NA	426.834	1.68321	6.69468e-06
BHLHE40-AS1	ENSG00000235831.6	antisense	NA	NA	NA	56.2412	2.38367	6.69684e-05
BNIP3P1	ENSG00000197358.9	transcribed_processed_pseudogene	NA	NA	NA	648.256	3.99098	1.26498e-37
BRSK2	ENSG00000174672.15	protein_coding	NA	NA	NA	210.429	1.03453	0.00982483
C1orf145	ENSG00000162913.9	protein_coding	NA	NA	NA	214.649	1.28267	0.00212638
C4orf47	ENSG00000205129.8	protein_coding	NA	NA	NA	144.859	4.63526	2.76504e-17
CA9	ENSG00000107159.12	protein_coding	NA	NA	NA	980.416	7.74809	4.44269e-58
CAPN12	ENSG00000182472.8	protein_coding	NA	NA	NA	503.319	2.11063	1.74147e-08
CASKIN1	ENSG00000167971.15	protein_coding	NA	NA	NA	540.361	1.22719	7.01685e-05
CCDC183	ENSG00000213213.13	protein_coding	NA	NA	NA	281.331	1.15814	0.000520142
CCDC85A	ENSG00000055813.5	protein_coding	NA	NA	NA	207.117	0.965644	0.0201234
CELF5	ENSG00000161082.12	protein_coding	NA	NA	NA	162.028	1.61872	0.00102421
CERS1	ENSG00000223802.7	protein_coding	NA	NA	NA	182.052	2.30162	3.48111e-08
CMB9-22P13.1	ENSG00000173727.11	lincRNA	NA	NA	NA	1185.67	4.20935	7.19483e-64
COL4A3	ENSG00000169031.18	protein_coding	NA	NA	NA	136.362	2.65771	1.57098e-10
CYP3A5	ENSG00000106258.13	protein_coding	NA	NA	NA	62.7541	2.2759	0.000582486
DARS-AS1	ENSG00000231890.7	antisense	NA	NA	NA	296.933	2.02066	6.81292e-08
DMRTA1	ENSG00000176399.3	protein_coding	NA	NA	NA	953.16	1.45808	2.23763e-07
DNAH11	ENSG00000105877.17	protein_coding	NA	NA	NA	165.566	2.66216	3.98801e-10
EDN2	ENSG00000127129.9	protein_coding	NA	NA	NA	173.947	2.6493	2.15022e-06
EMILIN3	ENSG00000183798.4	protein_coding	NA	NA	NA	63.5631	2.13754	5.0949e-05
ENO1-IT1	ENSG00000236269.1	sense_intronic	NA	NA	NA	446.536	2.12721	2.40079e-12
FAM229A	ENSG00000225828.1	protein_coding	NA	NA	NA	449.878	1.77794	4.07254e-09
FER1L4	ENSG00000088340.15	unitary_pseudogene	NA	NA	NA	3717.16	2.22966	7.24744e-14
FTX	ENSG00000230590.7	lincRNA	NA	NA	NA	1957.75	0.845845	0.000775857
GAL3ST1	ENSG00000128242.12	protein_coding	NA	NA	NA	71.036	3.51176	1.55285e-08
GAPDHP65	ENSG00000235587.2	processed_pseudogene	NA	NA	NA	79.7465	2.52439	4.18078e-07
GCOM1	ENSG00000137878.16	protein_coding	NA	NA	NA	83.7988	1.2576	0.01959
GJB3	ENSG00000188910.7	protein_coding	NA	NA	NA	494.129	1.48252	2.06839e-07
GNRH1	ENSG00000147437.9	protein_coding	NA	NA	NA	150.059	1.40408	0.000779948
GPR146	ENSG00000164849.8	protein_coding	NA	NA	NA	725.638	2.72055	2.01112e-19
GRIN3B	ENSG00000116032.5	protein_coding	NA	NA	NA	157.015	1.53728	0.000238492
GTF2IP7	ENSG00000227038.2	transcribed_unprocessed_pseudogene	NA	NA	NA	72.9152	1.44008	0.00594643
HIF1A-AS2	ENSG00000258667.1	lincRNA	NA	NA	NA	317.189	2.0865	2.27077e-05
INHA	ENSG00000123999.4	protein_coding	NA	NA	NA	235.115	1.40275	0.00143817
JPH2	ENSG00000149596.6	protein_coding	NA	NA	NA	221.028	6.44494	4.81656e-14
KIAA1683	ENSG00000130518.16	protein_coding	NA	NA	NA	2145.6	1.04217	5.84772e-05
L1CAM	ENSG00000198910.12	protein_coding	NA	NA	NA	1007.32	1.10862	0.000565573
LDHAP2	ENSG00000235674.2	processed_pseudogene	NA	NA	NA	84.3019	2.54767	2.96443e-07
LDHAP3	ENSG00000236090.2	processed_pseudogene	NA	NA	NA	32.0544	2.27837	0.000565573
LINC00472	ENSG00000233237.6	lincRNA	NA	NA	NA	110.625	1.256	0.0206579
LINC00482	ENSG00000185168.5	lincRNA	NA	NA	NA	214.917	1.6665	1.48927e-06
LINC00704	ENSG00000231298.6	lincRNA	NA	NA	NA	11.0205	2.25562	0.00173791
LINC00887	ENSG00000214145.6	lincRNA	NA	NA	NA	82.8701	4.00384	1.76516e-11
MACROD2	ENSG00000172264.16	protein_coding	NA	NA	NA	1743.55	0.70264	0.00824184
MBNL2	ENSG00000139793.18	protein_coding	NA	NA	NA	4330.19	1.35932	2.16437e-07
MKRN5P	ENSG00000224430.2	processed_pseudogene	NA	NA	NA	175.711	1.84975	5.52535e-06
MYO7A	ENSG00000137474.19	protein_coding	NA	NA	NA	107.386	1.24001	0.0180232
NDRG4	ENSG00000103034.14	protein_coding	NA	NA	NA	343.892	1.3549	0.00178166
NIM1K	ENSG00000177453.7	protein_coding	NA	NA	NA	109.875	3.52035	6.24414e-13
OBSCN	ENSG00000154358.19	protein_coding	NA	NA	NA	2044.6	1.63585	1.08973e-06
PAX8-AS1	ENSG00000189223.13	processed_transcript	NA	NA	NA	2059.91	2.01171	1.05183e-13
PCAT6	ENSG00000228288.6	antisense	NA	NA	NA	554.751	3.30779	1.43297e-23
PKD1L2	ENSG00000166473.16	polymorphic_pseudogene	NA	NA	NA	233.299	2.66511	2.30027e-10
PNCK	ENSG00000130822.15	protein_coding	NA	NA	NA	49.8316	1.5151	0.0256967
PNMA2	ENSG00000240694.8	protein_coding	NA	NA	NA	133.071	3.10397	5.09808e-14
PPFIA4	ENSG00000143847.15	protein_coding	NA	NA	NA	5069.47	3.39168	3.24474e-07
PPP1R3G	ENSG00000219607.3	protein_coding	NA	NA	NA	261.55	1.71957	0.0136548
PRELID2	ENSG00000186314.11	protein_coding	NA	NA	NA	2989.5	3.02864	1.81227e-24
PRPH	ENSG00000135406.13	protein_coding	NA	NA	NA	124.314	1.05228	0.0347477
PRSS53	ENSG00000151006.7	protein_coding	NA	NA	NA	544.645	2.29376	2.00157e-10
PRTN3	ENSG00000196415.9	protein_coding	NA	NA	NA	143.577	4.18374	9.29556e-15
RIMKLA	ENSG00000177181.14	protein_coding	NA	NA	NA	1436.31	2.99483	3.08197e-33
RIPK4	ENSG00000183421.11	protein_coding	NA	NA	NA	738.988	1.53663	5.74193e-07
RP11-104N10.2	ENSG00000274627.1	sense_intronic	NA	NA	NA	1898.27	0.779864	0.0171942
RP11-118K6.3	ENSG00000273001.1	lincRNA	NA	NA	NA	15.3039	1.92791	0.0146531
RP11-1334A24.5	ENSG00000279821.1	TEC	NA	NA	NA	120.605	1.74571	0.000841867
RP11-138A9.1	ENSG00000271204.1	lincRNA	NA	NA	NA	68.2406	1.35356	0.0100896
RP11-274H2.3	ENSG00000240032.1	antisense	NA	NA	NA	177.67	1.83839	2.90615e-05
RP11-274H2.5	ENSG00000261051.1	sense_overlapping	NA	NA	NA	218.917	1.54534	0.00258853
RP11-351I24.1	ENSG00000254554.1	antisense	NA	NA	NA	13.9916	2.41765	0.00391952
RP11-420A23.1	ENSG00000251432.6	lincRNA	NA	NA	NA	223.092	0.901418	0.0172416
RP11-446N19.1	ENSG00000272369.1	lincRNA	NA	NA	NA	193.54	0.98613	0.0144686
RP11-474P2.6	ENSG00000275481.1	lincRNA	NA	NA	NA	618.453	1.25519	6.13369e-05
RP11-474P2.7	ENSG00000278896.1	TEC	NA	NA	NA	230.625	1.4608	0.000340616
RP11-563J2.3	ENSG00000212743.2	lincRNA	NA	NA	NA	199.88	4.2204	1.33708e-18
RP11-66B24.7	ENSG00000272808.3	processed_transcript	NA	NA	NA	529.483	2.36038	4.44898e-18
RP11-783K16.5	ENSG00000256940.1	antisense	NA	NA	NA	180.574	2.10511	1.20376e-05
RP11-798M19.6	ENSG00000272870.1	antisense	NA	NA	NA	675.496	3.89684	7.44335e-29
RP11-96H19.1	ENSG00000257261.5	lincRNA	NA	NA	NA	522.504	1.13143	0.000127396
RP13-516M14.8	ENSG00000280407.2	TEC	NA	NA	NA	49.5753	1.43282	0.0156566
RP3-449O17.1	ENSG00000244627.5	transcribed_unprocessed_pseudogene	NA	NA	NA	142.747	1.75379	6.44089e-05
RP5-940J5.3	ENSG00000255966.1	antisense	NA	NA	NA	94.8188	2.53622	7.68665e-07
SCN5A	ENSG00000183873.15	protein_coding	NA	NA	NA	79.7133	2.91211	4.83212e-08
SDAD1P1	ENSG00000228451.3	transcribed_processed_pseudogene	NA	NA	NA	1541	3.55981	1.39126e-43
SEMA5B	ENSG00000082684.14	protein_coding	NA	NA	NA	105.924	5.43127	5.42201e-13
SLC2A14	ENSG00000173262.11	protein_coding	NA	NA	NA	153.661	2.89987	5.96434e-09
SLC6A16	ENSG00000063127.15	protein_coding	NA	NA	NA	122.352	1.07146	0.0245481
SLCO4A1	ENSG00000101187.15	protein_coding	NA	NA	NA	6069.09	2.48181	2.2891e-29
SPACA6P-AS	ENSG00000269959.1	lincRNA	NA	NA	NA	218.501	1.98794	5.9598e-05
SPTB	ENSG00000070182.17	protein_coding	NA	NA	NA	224.531	2.54743	7.70529e-07
SRRM3	ENSG00000177679.15	protein_coding	NA	NA	NA	1185.34	1.16575	9.54391e-06
STBD1	ENSG00000118804.8	protein_coding	NA	NA	NA	109.063	2.03727	5.36653e-05
SYNGR3	ENSG00000127561.14	protein_coding	NA	NA	NA	535.64	1.5925	3.09558e-08
TBC1D3L	ENSG00000274512.4	protein_coding	NA	NA	NA	104.304	2.43555	3.02435e-08
TBX6	ENSG00000149922.10	protein_coding	NA	NA	NA	534.205	0.955992	0.00263735
TFR2	ENSG00000106327.12	protein_coding	NA	NA	NA	51.6094	2.07498	0.000277514
TMEM105	ENSG00000185332.6	protein_coding	NA	NA	NA	215.009	1.31321	0.000299054
TNNT1	ENSG00000105048.16	protein_coding	NA	NA	NA	6847.29	2.23226	4.79226e-18
TRIM29	ENSG00000137699.16	protein_coding	NA	NA	NA	823.796	2.22518	0.00205659
UBASH3B	ENSG00000154127.9	protein_coding	NA	NA	NA	104.143	1.99538	0.000210402
UBE2Q2P1	ENSG00000189136.8	transcribed_unprocessed_pseudogene	NA	NA	NA	45.1407	1.45274	0.0190304
UCN2	ENSG00000145040.3	protein_coding	NA	NA	NA	10.6315	1.71128	0.038818
UPK1A	ENSG00000105668.7	protein_coding	NA	NA	NA	267.735	3.43063	2.13838e-19
UPK1A-AS1	ENSG00000226510.1	antisense	NA	NA	NA	93.8985	4.57824	3.51409e-13
URAHP	ENSG00000222019.7	transcribed_unprocessed_pseudogene	NA	NA	NA	462.755	0.789821	0.0241502
WFDC21P	ENSG00000261040.6	processed_transcript	NA	NA	NA	52.304	2.72184	7.51509e-06
ZMAT4	ENSG00000165061.14	protein_coding	NA	NA	NA	41.1569	2.11809	0.00422692

## Sheet: LUAD_HRGs_correlation_to_MBNL2
gene_name	GENCODE_gene_id	gene_type	Pearson correlation cofficient	P-value	FDR	A549.baseMean	A549.log2FoldChange	A549.padj
FAM63B	ENSG00000128923.10	protein_coding	0.587472	9.09788e-51	1.02351e-47	2844.28	0.957589	4.30554e-08
CREBRF	ENSG00000164463.12	protein_coding	0.580987	1.95083e-49	2.02586e-46	1868.27	1.09733	3.13426e-09
MEF2A	ENSG00000068305.17	protein_coding	0.527716	1.50987e-39	3.04227e-37	3952.51	0.640659	2.74512e-05
PDE5A	ENSG00000138735.15	protein_coding	0.51216	5.60184e-37	6.51939e-35	1191.72	0.881726	2.71089e-05
ZNF654	ENSG00000175105.5	protein_coding	0.482775	1.79978e-32	9.86227e-31	1494.31	0.768461	0.000215394
AHNAK	ENSG00000124942.13	protein_coding	0.465623	4.9069e-30	1.81987e-28	69686.4	0.941631	2.74792e-06
HECA	ENSG00000112406.4	protein_coding	0.448477	9.80438e-28	2.65e-26	968.643	1.06975	4.05258e-08
DOCK4	ENSG00000128512.19	protein_coding	0.446902	1.57165e-27	4.12787e-26	3326.51	1.04371	1.9991e-05
DST	ENSG00000151914.18	protein_coding	0.446575	1.73274e-27	4.52456e-26	45414.7	0.88926	1.25505e-11
YPEL2	ENSG00000175155.8	protein_coding	0.445456	2.4178e-27	6.10098e-26	2276.84	0.879327	6.5594e-06
HBP1	ENSG00000105856.13	protein_coding	0.442729	5.42003e-27	1.30429e-25	5760.67	0.586706	0.000257293
FOXO3	ENSG00000118689.14	protein_coding	0.442092	6.5362e-27	1.5535e-25	1301.79	0.709909	0.000962988
RP11-159G9.5	ENSG00000229729.6	lincRNA	0.433978	6.87988e-26	1.42081e-24	377.283	0.819674	0.00289163
LPP	ENSG00000145012.12	protein_coding	0.433562	7.74756e-26	1.59196e-24	21246.1	0.666248	0.000604387
ZNF264	ENSG00000083844.10	protein_coding	0.433167	8.67463e-26	1.77167e-24	2475.43	0.62719	0.000263713
DIXDC1	ENSG00000150764.13	protein_coding	0.433027	9.02696e-26	1.83807e-24	2329.24	0.603409	0.0393431
DAAM1	ENSG00000100592.15	protein_coding	0.429571	2.40567e-25	4.64614e-24	1346.41	0.799225	5.77869e-06
UTRN	ENSG00000152818.18	protein_coding	0.425949	6.64065e-25	1.20012e-23	10095.2	0.918585	1.21513e-09
TCP11L2	ENSG00000166046.10	protein_coding	0.417532	6.70473e-24	1.06362e-22	2926.73	1.41602	4.49416e-17
ANO6	ENSG00000177119.15	protein_coding	0.410895	3.9677e-23	5.74104e-22	27402.1	1.51493	9.1062e-13
ZNF292	ENSG00000188994.12	protein_coding	0.409553	5.65728e-23	8.06476e-22	4782.32	0.793731	1.57121e-05
KDM7A	ENSG00000006459.10	protein_coding	0.408457	7.54862e-23	1.05712e-21	2106.07	1.34861	5.96158e-15
MITF	ENSG00000187098.14	protein_coding	0.399685	7.31165e-22	8.97338e-21	4340.68	0.655927	4.85033e-05
CDK19	ENSG00000155111.14	protein_coding	0.38754	1.51942e-20	1.58273e-19	2456.86	0.593657	0.000436736
HIVEP2	ENSG00000010818.8	protein_coding	0.385508	2.49383e-20	2.54088e-19	2443.52	0.616994	0.00014573
ZNF836	ENSG00000196267.12	protein_coding	0.382664	4.95997e-20	4.87688e-19	115.578	0.884304	0.0226911
SCAPER	ENSG00000140386.12	protein_coding	0.380943	7.49531e-20	7.22762e-19	1706.03	0.606407	0.00247975
NTN4	ENSG00000074527.11	protein_coding	0.378356	1.38773e-19	1.2956e-18	8053.43	0.831458	0.0014686
PNRC1	ENSG00000146278.10	protein_coding	0.377442	1.72305e-19	1.59542e-18	5802.65	0.61866	9.81885e-05
OTUD1	ENSG00000165312.6	protein_coding	0.376256	2.27874e-19	2.08704e-18	489.169	0.693281	0.00395534
LTBP2	ENSG00000119681.11	protein_coding	0.36759	1.69889e-18	1.41575e-17	2200.37	0.780259	4.04234e-06
KLHL24	ENSG00000114796.15	protein_coding	0.366298	2.28039e-18	1.86465e-17	3064.79	0.855085	9.04541e-07
FOXN3	ENSG00000053254.15	protein_coding	0.364555	3.38488e-18	2.69592e-17	3025.34	0.858666	1.90296e-08
PLEKHA2	ENSG00000169499.14	protein_coding	0.364191	3.67528e-18	2.91346e-17	4089.08	1.44709	8.24118e-21
FUT11	ENSG00000196968.10	protein_coding	0.363201	4.59284e-18	3.59023e-17	4527.51	1.47325	4.94539e-21
FAM13A	ENSG00000138640.14	protein_coding	0.359199	1.12237e-17	8.39449e-17	4912.15	1.32305	9.25457e-12
PAG1	ENSG00000076641.4	protein_coding	0.354126	3.42154e-17	2.42727e-16	159.265	2.20682	3.4971e-08
ABCA1	ENSG00000165029.15	protein_coding	0.353316	4.08111e-17	2.86505e-16	6407.74	0.82337	1.58746e-05
GPR155	ENSG00000163328.13	protein_coding	0.34928	9.74161e-17	6.55265e-16	255.259	1.40329	6.44132e-07
BNIP3L	ENSG00000104765.14	protein_coding	0.348752	1.09055e-16	7.29192e-16	21443.2	1.95683	3.87642e-54
DPYSL2	ENSG00000092964.16	protein_coding	0.348666	1.11079e-16	7.41626e-16	41284.3	1.07041	5.9408e-08
FAM160A1	ENSG00000164142.15	protein_coding	0.347242	1.50419e-16	9.89597e-16	199.615	2.22986	1.08186e-11
TNFAIP8	ENSG00000145779.7	protein_coding	0.343962	3.00722e-16	1.91227e-15	3948.91	1.16584	2.63716e-07
KLF6	ENSG00000067082.14	protein_coding	0.342072	4.46631e-16	2.79532e-15	3064.51	0.605308	0.000700501
ARHGAP29	ENSG00000137962.12	protein_coding	0.338171	1.00175e-15	6.04002e-15	4806.28	0.616106	7.9778e-05
MAF	ENSG00000178573.6	protein_coding	0.337217	1.21859e-15	7.28243e-15	93.3853	2.45146	5.9194e-08
INSIG2	ENSG00000125629.14	protein_coding	0.336146	1.51698e-15	8.97032e-15	1645.79	1.4488	1.84071e-19
ZFP90	ENSG00000184939.15	protein_coding	0.333218	2.74862e-15	1.58304e-14	4261.5	0.688026	0.000181382
KLF7	ENSG00000118263.14	protein_coding	0.323102	2.04215e-14	1.07064e-13	4568.89	1.58405	1.53825e-28
RBMS2	ENSG00000076067.11	protein_coding	0.322521	2.28621e-14	1.19304e-13	8270.5	0.7853	5.40728e-06
CCNG2	ENSG00000138764.13	protein_coding	0.321573	2.74708e-14	1.42254e-13	1715.75	1.09917	8.01934e-09
PAM	ENSG00000145730.20	protein_coding	0.320763	3.21279e-14	1.64665e-13	11765.7	1.98801	4.80835e-41
RIOK3	ENSG00000101782.14	protein_coding	0.315914	8.11605e-14	4.01196e-13	3068.16	0.896632	1.9297e-09
ESYT2	ENSG00000117868.15	protein_coding	0.313546	1.26839e-13	6.1506e-13	19044.4	0.728642	7.68255e-07
SLC17A5	ENSG00000119899.12	protein_coding	0.306376	4.78561e-13	2.16943e-12	2269.88	0.674427	0.00434659
ITPR1	ENSG00000150995.18	protein_coding	0.303652	7.85149e-13	3.46843e-12	2730.84	0.973037	4.39634e-07
MALT1	ENSG00000172175.12	protein_coding	0.297832	2.22244e-12	9.37298e-12	10050.1	0.734361	0.00097763
MACROD2	ENSG00000172264.16	protein_coding	0.297642	2.29828e-12	9.67771e-12	206.301	0.899208	0.00383721
LOX	ENSG00000113083.12	protein_coding	0.295437	3.38704e-12	1.40175e-11	255.837	2.61539	1.57053e-12
AGO4	ENSG00000134698.10	protein_coding	0.295208	3.52539e-12	1.45677e-11	1217.17	0.587428	0.00289246
ADAM9	ENSG00000168615.11	protein_coding	0.293707	4.58092e-12	1.86779e-11	50239.1	0.675693	2.28252e-06
SLC38A2	ENSG00000134294.13	protein_coding	0.292047	6.10918e-12	2.45971e-11	77978.2	1.11024	3.59565e-11
KLF11	ENSG00000172059.10	protein_coding	0.291722	6.46195e-12	2.59632e-11	665.027	0.696364	0.00232761
C7orf60	ENSG00000164603.11	protein_coding	0.291707	6.47836e-12	2.60214e-11	1712.46	0.736699	0.000860822
YPEL5	ENSG00000119801.12	protein_coding	0.291378	6.85677e-12	2.74678e-11	5048.44	0.700908	1.99703e-06
NEBL	ENSG00000078114.18	protein_coding	0.287812	1.26241e-11	4.91848e-11	4367.26	0.845138	3.27957e-06
ITGB8	ENSG00000105855.9	protein_coding	0.287416	1.35028e-11	5.25326e-11	1274.28	0.992851	0.00105617
GS1-358P8.4	ENSG00000260822.1	sense_overlapping	0.286596	1.55135e-11	5.99064e-11	2095.26	0.933492	2.14115e-06
KIAA1715	ENSG00000144320.13	protein_coding	0.285055	2.01168e-11	7.67601e-11	3423.35	0.972415	9.71854e-08
SRPX	ENSG00000101955.14	protein_coding	0.283436	2.63885e-11	9.94263e-11	767.688	0.924014	1.38428e-05
ARFGEF3	ENSG00000112379.8	protein_coding	0.283147	2.76922e-11	1.04135e-10	3289.37	0.872119	5.68616e-06
SNX25	ENSG00000109762.15	protein_coding	0.281277	3.7789e-11	1.40267e-10	2346.86	0.820512	0.000789305
ARHGEF37	ENSG00000183111.11	protein_coding	0.278189	6.28121e-11	2.27641e-10	1032.58	1.35509	3.93768e-12
SETBP1	ENSG00000152217.16	protein_coding	0.277978	6.50154e-11	2.34932e-10	2109.22	0.772267	0.00148386
SAMD4A	ENSG00000020577.13	protein_coding	0.273619	1.31717e-10	4.61983e-10	1595.17	1.73093	5.75748e-25
UBASH3B	ENSG00000154127.9	protein_coding	0.271545	1.83503e-10	6.3504e-10	7731.7	0.741624	0.00136504
INADL	ENSG00000132849.19	protein_coding	0.269527	2.52683e-10	8.62155e-10	7658.95	0.595104	6.8455e-05
ZNF160	ENSG00000170949.17	protein_coding	0.26426	5.75189e-10	1.89576e-09	3078.02	0.960517	4.37016e-08
LRP1	ENSG00000123384.13	protein_coding	0.262804	7.19734e-10	2.35378e-09	8818.98	1.32454	2.92019e-09
TIPARP	ENSG00000163659.12	protein_coding	0.261389	8.93812e-10	2.8985e-09	6509.31	1.30678	2.158e-21
CLIP4	ENSG00000115295.19	protein_coding	0.260045	1.09669e-09	3.5295e-09	6721.24	0.610513	0.00275069
TSC22D2	ENSG00000196428.12	protein_coding	0.258891	1.30596e-09	4.16402e-09	2146.31	1.04717	4.10238e-10
CAPN2	ENSG00000162909.17	protein_coding	0.252257	3.50722e-09	1.07437e-08	31586.4	0.825781	0.000370157
NEK6	ENSG00000119408.16	protein_coding	0.251628	3.84602e-09	1.17416e-08	3215.39	1.18702	5.17608e-09
SLC25A36	ENSG00000114120.11	protein_coding	0.249652	5.13009e-09	1.54935e-08	3265.06	0.595884	0.00257437
NUDT13	ENSG00000166321.13	protein_coding	0.247773	6.7314e-09	2.01226e-08	396.729	1.28738	2.5982e-07
RND3	ENSG00000115963.13	protein_coding	0.244888	1.01713e-08	2.98569e-08	6205.38	0.700985	0.000660957
CD109	ENSG00000156535.13	protein_coding	0.244279	1.10905e-08	3.24353e-08	17659.8	0.899442	1.8845e-11
PRRG4	ENSG00000135378.3	protein_coding	0.241432	1.65653e-08	4.74902e-08	731.429	1.45653	3.58823e-06
MXD1	ENSG00000059728.10	protein_coding	0.239317	2.22447e-08	6.28512e-08	483.006	0.887874	0.000568578
OSMR	ENSG00000145623.12	protein_coding	0.239004	2.32299e-08	6.54902e-08	11732.9	0.818807	4.2385e-07
C1orf116	ENSG00000182795.12	protein_coding	0.238106	2.63027e-08	7.39147e-08	1656.33	0.659247	0.00970266
C4orf3	ENSG00000164096.12	protein_coding	0.236578	3.24517e-08	9.03855e-08	3805.09	1.39275	2.02508e-20
ZBTB25	ENSG00000089775.11	protein_coding	0.233398	5.00227e-08	1.36564e-07	2711.51	0.705218	3.23342e-05
KDM3A	ENSG00000115548.16	protein_coding	0.230819	7.07296e-08	1.90058e-07	7064.62	1.60425	1.7931e-26
AMPD3	ENSG00000133805.15	protein_coding	0.225119	1.49934e-07	3.88727e-07	650.305	1.47672	6.45298e-12
EGFR	ENSG00000146648.15	protein_coding	0.224296	1.66835e-07	4.30315e-07	34775.4	1.79762	6.04049e-18
FANK1	ENSG00000203780.10	protein_coding	0.223482	1.85368e-07	4.75664e-07	486.623	1.45301	1.897e-08
CCL28	ENSG00000151882.11	protein_coding	0.22035	2.76895e-07	6.98185e-07	112.08	1.33279	0.00116191
TANC2	ENSG00000170921.14	protein_coding	0.217308	4.06625e-07	1.00965e-06	8988.44	0.895472	2.57008e-07
LINC-PINT	ENSG00000231721.6	antisense	0.217253	4.09465e-07	1.01595e-06	2671.58	1.30248	6.66924e-07
DENND5A	ENSG00000184014.7	protein_coding	0.21139	8.45272e-07	2.02865e-06	6580.96	0.836841	4.77161e-08
TSC22D3	ENSG00000157514.16	protein_coding	0.210204	9.76266e-07	2.32814e-06	1922.11	0.83735	0.0063058
CYTH3	ENSG00000008256.15	protein_coding	0.207411	1.36649e-06	3.20216e-06	3348.98	0.789828	2.78319e-07
MXI1	ENSG00000119950.20	protein_coding	0.202298	2.49911e-06	5.67692e-06	2807.47	1.9326	2.01122e-22
SFXN3	ENSG00000107819.13	protein_coding	0.201186	2.84374e-06	6.41231e-06	3554.17	1.15686	2.3939e-11
C4orf47	ENSG00000205129.8	protein_coding	0.199555	3.43321e-06	7.67993e-06	85.0066	2.12558	1.96282e-07
AC007566.10	ENSG00000244055.1	antisense	0.199304	3.53343e-06	7.88451e-06	109.017	0.864632	0.0386133
RNF24	ENSG00000101236.16	protein_coding	0.197944	4.1284e-06	9.14112e-06	3094.41	1.33028	7.86515e-13
CYP3A5	ENSG00000106258.13	protein_coding	0.197813	4.19073e-06	9.27002e-06	2047.78	0.802916	0.00172378
NUAK1	ENSG00000074590.13	protein_coding	0.196312	4.96937e-06	1.09226e-05	3915.16	1.19277	0.0127547
FBXO32	ENSG00000156804.7	protein_coding	0.19374	6.63483e-06	1.43934e-05	706.269	0.823002	0.00066886
DSC2	ENSG00000134755.14	protein_coding	0.192816	7.35381e-06	1.58741e-05	1707.89	1.17862	9.87448e-09
PNMA2	ENSG00000240694.8	protein_coding	0.191295	8.7017e-06	1.86406e-05	7041.8	0.934406	8.46284e-09
TRPC1	ENSG00000144935.14	protein_coding	0.190925	9.06389e-06	1.93918e-05	3222.82	0.842395	1.06907e-05
DUSP1	ENSG00000120129.5	protein_coding	0.186191	1.51605e-05	3.15649e-05	12501.7	1.68297	8.29534e-14
PCDH1	ENSG00000156453.13	protein_coding	0.184343	1.84671e-05	3.8091e-05	292.167	1.01722	0.00138408
DENND3	ENSG00000105339.10	protein_coding	0.181925	2.38405e-05	4.85659e-05	1769.62	0.647294	0.000576378
TMEM45A	ENSG00000181458.10	protein_coding	0.181833	2.40708e-05	4.90056e-05	1572.77	2.84409	1.02878e-39
MGLL	ENSG00000074416.13	protein_coding	0.181745	2.42929e-05	4.94205e-05	8984.94	0.935568	1.54717e-07
C10orf10	ENSG00000165507.8	protein_coding	0.179988	2.91791e-05	5.89432e-05	64.3937	1.23706	0.00784102
FOSL2	ENSG00000075426.11	protein_coding	0.179533	3.05897e-05	6.16635e-05	12847.2	0.72004	1.45695e-05
PTGS1	ENSG00000095303.14	protein_coding	0.177898	3.62064e-05	7.22735e-05	315.482	1.86275	2.51485e-06
NATD1	ENSG00000274180.1	protein_coding	0.176458	4.19474e-05	8.31555e-05	753.578	1.1792	1.01277e-06
DAPK2	ENSG00000035664.11	protein_coding	0.175832	4.47059e-05	8.82612e-05	629.594	0.639133	0.00586943
TMEM159	ENSG00000011638.10	protein_coding	0.174864	4.93066e-05	9.70178e-05	1302.79	0.820438	0.00339006
KDM5B	ENSG00000117139.16	protein_coding	0.173386	5.72077e-05	0.000111685	10924.2	0.821371	4.1768e-09
INSR	ENSG00000171105.13	protein_coding	0.173342	5.74581e-05	0.000112158	2453.22	0.708623	0.000338463
CDC42EP3	ENSG00000163171.7	protein_coding	0.173	5.94613e-05	0.000115817	8100.66	0.77169	6.18718e-08
COL4A3	ENSG00000169031.18	protein_coding	0.172944	5.97935e-05	0.00011638	1798.57	2.37405	2.54153e-28
PGM2L1	ENSG00000165434.7	protein_coding	0.172921	5.993e-05	0.000116612	7419.64	1.09267	4.42299e-07
GBE1	ENSG00000114480.12	protein_coding	0.171726	6.74956e-05	0.000130543	8182.22	1.20851	2.111e-19
GPRC5B	ENSG00000167191.11	protein_coding	0.168801	9.00071e-05	0.000171503	2275.49	0.971778	4.07309e-07
FYN	ENSG00000010810.17	protein_coding	0.167327	0.000103866	0.000196303	200.645	0.692182	0.0366414
PDK1	ENSG00000152256.13	protein_coding	0.166174	0.000116083	0.000218131	2619.28	2.44226	1.23174e-32
SFMBT2	ENSG00000198879.11	protein_coding	0.160256	0.000203088	0.000371603	2448.74	0.848225	5.77678e-06
PTAFR	ENSG00000169403.11	protein_coding	0.160124	0.000205584	0.000375814	212.428	2.29769	3.98202e-11
PAQR5	ENSG00000137819.13	protein_coding	0.159042	0.000227244	0.000413115	11438.3	0.669144	0.00878813
VLDLR	ENSG00000147852.15	protein_coding	0.158952	0.000229138	0.000416278	3661.02	1.58971	2.93715e-15
ZNF277	ENSG00000198839.9	protein_coding	0.15874	0.00023364	0.000423772	2576.3	0.596688	0.000456186
TNFRSF11A	ENSG00000141655.15	protein_coding	0.157671	0.000257725	0.000464958	1098.29	0.614921	0.00761253
TES	ENSG00000135269.17	protein_coding	0.155823	0.000304915	0.000545356	4760.9	0.676699	6.7952e-06
TMBIM1	ENSG00000135926.12	protein_coding	0.155377	0.000317459	0.000566292	5813.75	0.84276	1.49105e-07
C16orf45	ENSG00000166780.10	protein_coding	0.15432	0.000349129	0.00062	2621.92	1.02857	1.86232e-06
ZFP36L1	ENSG00000185650.9	protein_coding	0.153676	0.000369816	0.000654671	11144.6	0.625816	9.37214e-05
MAP3K8	ENSG00000107968.9	protein_coding	0.15333	0.000381436	0.000673826	3288.21	0.792297	7.22555e-07
DHX32	ENSG00000089876.11	protein_coding	0.151011	0.000468295	0.000817638	7325.76	0.720066	0.00122197
TRIO	ENSG00000038382.17	protein_coding	0.150772	0.000478243	0.000834469	17236.2	0.892355	2.95455e-10
FMNL2	ENSG00000157827.19	protein_coding	0.147468	0.00063723	0.00109531	6304.71	0.786578	0.000170705
FLNA	ENSG00000196924.14	protein_coding	0.146804	0.000674593	0.00115454	197480	1.0273	6.14718e-13
TRIM29	ENSG00000137699.16	protein_coding	0.145539	0.000751413	0.00127904	266.815	0.677818	0.0220006
RPL17P50	ENSG00000213700.3	processed_pseudogene	0.14454	0.000817722	0.0013851	97.5422	1.58319	4.23407e-05
ALOX5	ENSG00000012779.10	protein_coding	0.143868	0.000865362	0.00146121	128.547	1.21848	0.00403678
NPEPPS	ENSG00000141279.15	protein_coding	0.143764	0.000872952	0.00147329	10957.9	0.622368	0.000315951
SGPP2	ENSG00000163082.9	protein_coding	0.143558	0.00088814	0.00149705	456.596	0.93084	0.00238405
FHL2	ENSG00000115641.18	protein_coding	0.143474	0.000894438	0.00150673	1599.25	0.725764	3.41702e-05
GPR160	ENSG00000173890.16	protein_coding	0.142975	0.00093259	0.00156669	444.49	1.01876	0.000132258
NAV1	ENSG00000134369.15	protein_coding	0.142229	0.000992416	0.00166162	2064.54	0.979494	1.99514e-06
GSN	ENSG00000148180.17	protein_coding	0.139764	0.00121636	0.00201459	10683.2	1.16757	9.92913e-11
RP11-282O18.3	ENSG00000235423.8	antisense	0.139684	0.00122432	0.00202705	466.509	1.7403	1.36808e-07
DRAM1	ENSG00000136048.13	protein_coding	0.137815	0.00142539	0.00234031	4742.66	0.680233	0.00132812
SDC2	ENSG00000169439.11	protein_coding	0.134979	0.00178889	0.00290439	71.4461	1.27747	0.0034999
CXCR4	ENSG00000121966.6	protein_coding	0.134332	0.00188294	0.00304828	426.217	3.64611	4.38838e-30
AHNAK2	ENSG00000185567.6	protein_coding	0.13181	0.00229419	0.00367126	61889	0.747665	1.08663e-07
PTRF	ENSG00000177469.12	protein_coding	0.13124	0.00239794	0.00382695	33181.2	1.28002	4.32515e-12
SUN1	ENSG00000164828.17	protein_coding	0.131209	0.00240357	0.00383503	7976.68	0.603582	0.000691076
APP	ENSG00000142192.20	protein_coding	0.131198	0.00240578	0.0038381	62088.8	1.21394	1.0029e-15
PDLIM2	ENSG00000120913.23	protein_coding	0.129996	0.00263921	0.00419317	1089.65	1.92693	3.2714e-24
PFKFB3	ENSG00000170525.18	protein_coding	0.12696	0.00332366	0.00520285	46532.2	1.38325	6.2732e-26
DUSP10	ENSG00000143507.17	protein_coding	0.126283	0.00349669	0.00546042	1367.16	0.624931	0.00568366
WISP2	ENSG00000064205.10	protein_coding	0.125268	0.0037714	0.00586498	3968.42	4.04834	3.08717e-97
CALCOCO1	ENSG00000012822.15	protein_coding	0.124351	0.00403656	0.0062421	4797.03	1.14835	2.75972e-14
RAB9A	ENSG00000123595.6	protein_coding	0.121887	0.00483392	0.00739467	1731.92	0.795797	0.000185998
NREP	ENSG00000134986.13	protein_coding	0.120417	0.00537507	0.00817063	1455.1	0.602047	0.00671407
PXDN	ENSG00000130508.10	protein_coding	0.12032	0.00541277	0.00822147	2549.16	1.42492	2.49721e-14
TGFBI	ENSG00000120708.16	protein_coding	0.119678	0.00566723	0.00858094	112929	1.92872	5.96661e-54
PPP1R3C	ENSG00000119938.8	protein_coding	0.119409	0.0057769	0.00874013	4320.62	2.01418	9.18254e-23
PAX8-AS1	ENSG00000189223.13	processed_transcript	0.116748	0.00697048	0.0104164	250.401	0.874759	0.00302849
BACE2	ENSG00000182240.15	protein_coding	0.115226	0.00774886	0.0115095	3319.63	1.23842	3.48134e-13
GPNMB	ENSG00000136235.15	protein_coding	0.112055	0.00962338	0.0140876	297.26	0.795141	0.00674266
EPAS1	ENSG00000116016.13	protein_coding	0.110154	0.0109317	0.0159159	12104.4	0.608525	0.00766717
LAMC2	ENSG00000058085.14	protein_coding	0.109167	0.0116708	0.0169378	2601.7	1.06212	5.27454e-11
CSRNP1	ENSG00000144655.14	protein_coding	0.10868	0.0120522	0.0174558	1745.77	0.99461	1.65969e-09
ZNF395	ENSG00000186918.13	protein_coding	0.10856	0.0121471	0.0175837	2547.5	0.939777	1.25448e-08
MRC2	ENSG00000011028.13	protein_coding	0.107813	0.0127569	0.018419	10316.5	0.83516	8.76816e-09
SLC6A6	ENSG00000131389.16	protein_coding	0.106167	0.0141973	0.0203832	19773	1.35163	6.92913e-18
CNKSR3	ENSG00000153721.17	protein_coding	0.105224	0.0150847	0.0215632	1770.59	0.974901	1.3652e-05
ZNF250	ENSG00000196150.13	protein_coding	0.104727	0.0155725	0.0222112	1225.5	0.829489	4.07969e-06
CAMK1D	ENSG00000183049.12	protein_coding	0.102406	0.0180353	0.0255217	2769.34	0.641727	0.00228511
TTC9	ENSG00000133985.2	protein_coding	0.101537	0.0190407	0.0268683	996.332	0.788729	2.41336e-05
GNS	ENSG00000135677.10	protein_coding	0.0988692	0.0224416	0.0313365	21543.7	0.589321	3.24623e-05
RP11-104N10.2	ENSG00000274627.1	sense_intronic	0.0959193	0.0268027	0.0370289	1253.92	0.657291	0.0178638
TRPV4	ENSG00000111199.10	protein_coding	0.0953579	0.0277107	0.0381924	62.9867	1.03175	0.0262201
STEAP3	ENSG00000115107.19	protein_coding	0.0927435	0.0322951	0.0440477	5512.23	1.64185	3.89026e-14
GFPT2	ENSG00000131459.12	protein_coding	0.0921966	0.033332	0.0453656	2408.26	1.07459	5.61187e-11
HLA-E	ENSG00000204592.8	protein_coding	0.0891827	0.0395698	0.0532488	5807.6	0.757407	3.64249e-06
SEC14L2	ENSG00000100003.17	protein_coding	0.0873713	0.0437743	0.058516	534.729	0.910377	0.000381693
CTSK	ENSG00000143387.12	protein_coding	0.0869697	0.044756	0.0597337	297.694	0.609187	0.0328535
EFNB3	ENSG00000108947.4	protein_coding	0.0851442	0.0494536	0.0655368	463.346	1.21077	1.51422e-05
OLFML2A	ENSG00000185585.19	protein_coding	0.0844653	0.0513027	0.0678674	3432.11	0.817254	0.000114697
LRRC3	ENSG00000160233.7	protein_coding	0.0844459	0.0513563	0.0679316	160.387	0.847721	0.0273097
P4HA1	ENSG00000122884.12	protein_coding	0.0836539	0.0535882	0.0705865	11741.5	1.5569	7.39335e-25
PDK3	ENSG00000067992.12	protein_coding	0.080723	0.0625609	0.0815382	1686.43	0.781648	5.83956e-06
ERRFI1	ENSG00000116285.12	protein_coding	0.0787632	0.0692255	0.0896445	15448.9	1.58116	3.38157e-10
CLIP2	ENSG00000106665.15	protein_coding	0.078014	0.0719224	0.0928786	8391.78	1.06489	0.020281
HK2	ENSG00000159399.9	protein_coding	0.0776731	0.0731777	0.0944273	734.278	2.99878	1.24319e-20
ANKRD37	ENSG00000186352.8	protein_coding	0.0772735	0.0746717	0.0962632	231.181	1.59227	2.05204e-07
SMAD7	ENSG00000101665.8	protein_coding	0.0761412	0.0790407	0.101325	1649.92	1.1903	2.44258e-13
SPNS2	ENSG00000183018.8	protein_coding	0.0711638	0.100762	0.127154	178.334	2.38159	1.85752e-11
WFDC21P	ENSG00000261040.6	processed_transcript	0.0702539	0.105204	0.132388	978.666	1.69349	7.52558e-05
ALS2CL	ENSG00000178038.16	protein_coding	0.0691236	0.110935	0.139004	848.08	0.609945	0.0165914
EHD2	ENSG00000024422.11	protein_coding	0.0681256	0.116198	0.144992	8071.03	0.798782	2.10235e-06
ITGB4	ENSG00000132470.13	protein_coding	0.06619	0.12696	0.157605	14239.3	1.1475	8.82681e-08
OPTN	ENSG00000123240.16	protein_coding	0.0639	0.140673	0.173122	4812.44	1.34323	4.91173e-14
ZNF514	ENSG00000144026.11	protein_coding	0.0638991	0.140679	0.173122	2186.47	0.841808	1.70596e-06
SLC45A3	ENSG00000158715.5	protein_coding	0.0637771	0.14144	0.173981	469.945	0.707852	0.0239113
ZNF274	ENSG00000171606.17	protein_coding	0.0621506	0.151894	0.185673	1879.98	0.585785	0.00215391
SYDE1	ENSG00000105137.12	protein_coding	0.0609289	0.160124	0.194887	1719.96	0.979933	1.45131e-06
CP	ENSG00000047457.13	protein_coding	0.0579794	0.181372	0.218482	29272.7	1.02513	0.0487903
RRAGD	ENSG00000025039.14	protein_coding	0.0563722	0.193796	0.23239	1084.97	1.08217	1.24168e-08
ATP1B1	ENSG00000143153.12	protein_coding	0.0554703	0.201035	0.240132	54100.7	1.34888	3.94955e-16
YEATS2	ENSG00000163872.15	protein_coding	0.0552464	0.202862	0.242078	4727.78	0.955581	1.20297e-10
JUN	ENSG00000177606.6	protein_coding	0.0524168	0.226999	0.268039	3425.19	2.34331	2.77556e-39
RIMKLA	ENSG00000177181.14	protein_coding	0.0511906	0.238069	0.279862	1347.93	1.72223	4.46062e-19
RP11-164P12.5	ENSG00000278978.1	TEC	0.050323	0.246129	0.288458	31.7714	1.67837	0.000625244
ICAM1	ENSG00000090339.8	protein_coding	0.0501806	0.247469	0.289928	116.847	1.22247	0.00528259
SH3BP2	ENSG00000087266.15	protein_coding	0.0495305	0.253655	0.296535	2085.68	1.37566	4.29198e-06
SPOCK1	ENSG00000152377.13	protein_coding	0.0490396	0.258397	0.301709	593.383	0.856075	0.000646362
GALNT18	ENSG00000110328.5	protein_coding	0.0471529	0.277188	0.321619	1349.6	1.05607	1.25839e-09
ARL4C	ENSG00000188042.7	protein_coding	0.0458479	0.290716	0.335815	14603.3	0.758101	0.000377355
MEX3B	ENSG00000183496.5	protein_coding	0.041628	0.337449	0.384306	515.925	0.75112	0.002683
FOXO4	ENSG00000184481.16	protein_coding	0.0391533	0.366978	0.414301	477.778	0.669765	0.00729965
FSTL3	ENSG00000070404.9	protein_coding	0.0356591	0.411314	0.459398	7239.71	1.46385	6.88185e-27
TNFRSF10C	ENSG00000173535.13	protein_coding	0.0354012	0.414708	0.462958	425.012	0.688148	0.0113241
AK4	ENSG00000162433.14	protein_coding	0.0352993	0.416053	0.464191	2972.5	1.77344	5.29082e-23
MYH9	ENSG00000100345.20	protein_coding	0.0349449	0.420752	0.468906	51508.3	0.78401	2.67533e-06
SLCO4A1	ENSG00000101187.15	protein_coding	0.0339933	0.433521	0.481848	2918.08	1.24934	0.010749
TTLL3	ENSG00000214021.15	protein_coding	0.0312586	0.471438	0.518908	1101.4	0.658059	0.000426005
RAB32	ENSG00000118508.4	protein_coding	0.0254832	0.557176	0.602812	2335.8	0.9329	3.30612e-05
MYADM	ENSG00000179820.15	protein_coding	0.0247851	0.568031	0.613014	9859.48	0.631268	0.0019129
PLOD2	ENSG00000152952.11	protein_coding	0.0235635	0.587265	0.631116	51856.5	2.01641	6.66319e-49
BHLHE40	ENSG00000134107.4	protein_coding	0.0225318	0.603738	0.646145	17565.4	1.12497	9.4946e-12
MFNG	ENSG00000100060.17	protein_coding	0.0219229	0.613557	0.655302	155.568	1.04048	0.00213295
C11orf80	ENSG00000173715.15	protein_coding	0.0209253	0.629794	0.669993	1040.7	1.01685	5.23823e-08
ALPK3	ENSG00000136383.6	protein_coding	0.0208028	0.6318	0.671969	245.444	1.34483	9.00256e-06
OPN3	ENSG00000054277.12	protein_coding	0.0199094	0.646514	0.686158	6807.78	0.733584	4.21037e-05
PTK6	ENSG00000101213.6	protein_coding	0.0198302	0.647826	0.687281	234.085	1.50334	2.04636e-06
DARS	ENSG00000115866.10	protein_coding	0.0192835	0.656906	0.695863	7417.64	0.602717	7.36013e-05
NPC2	ENSG00000119655.8	protein_coding	0.0178731	0.680562	0.716996	5179.55	0.944017	1.0261e-08
SDK1	ENSG00000146555.18	protein_coding	0.0168104	0.698598	0.733479	649.824	1.78149	1.67319e-15
OSER1-AS1	ENSG00000223891.5	lincRNA	0.0167604	0.69945	0.734203	296.027	1.05323	8.62078e-05
RAB20	ENSG00000139832.4	protein_coding	0.0152443	0.725486	0.7589	342.413	1.5898	3.96397e-08
QSOX1	ENSG00000116260.16	protein_coding	0.0147855	0.73343	0.76594	7655.35	1.47525	3.36066e-19
ITGA5	ENSG00000161638.10	protein_coding	0.0146664	0.735496	0.767682	7563.39	1.16745	1.98816e-17
DUSP5	ENSG00000138166.5	protein_coding	0.0117381	0.786877	0.814823	2975.17	1.10674	1.10392e-05
IGFBP5	ENSG00000115461.4	protein_coding	0.0115325	0.790522	0.818346	621.19	2.37213	6.01563e-17
BMF	ENSG00000104081.13	protein_coding	0.0105889	0.80731	0.834381	296.123	0.743937	0.0323159
TGFB1	ENSG00000105329.9	protein_coding	0.00962494	0.824553	0.849471	2960.44	0.62183	0.000105009
RNF122	ENSG00000133874.1	protein_coding	0.00822153	0.849806	0.87143	415.737	0.807238	0.00107484
RIPK4	ENSG00000183421.11	protein_coding	0.0064354	0.882165	0.89976	1397.03	0.813755	9.33599e-05
PDGFB	ENSG00000100311.16	protein_coding	0.00483678	0.911296	0.924304	736.843	2.43975	1.51122e-31
TBC1D22A	ENSG00000054611.13	protein_coding	0.00372452	0.931637	0.942246	1898.34	0.913718	2.36061e-08
RP11-268J15.5	ENSG00000116883.8	antisense	0.00336574	0.938208	0.947756	44.7992	1.52402	0.00157492
ERO1A	ENSG00000197930.12	protein_coding	0.00159182	0.970753	0.97545	14753.6	0.879771	1.75059e-09
WSB1	ENSG00000109046.14	protein_coding	0.000888036	0.983681	0.986605	7438.44	1.13259	9.24496e-13
NKILA	ENSG00000278709.1	antisense	0.000261107	0.995202	0.995939	480.432	0.665039	0.0091657
TMEM45B	ENSG00000151715.7	protein_coding	-0.000584549	0.989258	0.990946	172.318	1.85145	7.98778e-07
ST6GALNAC6	ENSG00000160408.14	protein_coding	-0.0017567	0.967725	0.973067	2309.49	1.31875	1.11827e-05
P4HA2	ENSG00000072682.18	protein_coding	-0.00420022	0.922931	0.934842	7850.19	1.59458	1.02352e-32
LAMB3	ENSG00000196878.12	protein_coding	-0.00578466	0.894006	0.909707	2837.93	1.75774	2.13928e-14
PPP1R3B	ENSG00000173281.4	protein_coding	-0.00621556	0.886162	0.903268	3374.04	1.14691	3.40457e-12
NGEF	ENSG00000066248.14	protein_coding	-0.00874789	0.840315	0.863192	525.131	0.778112	0.00645943
EFEMP2	ENSG00000172638.12	protein_coding	-0.00970984	0.823031	0.848097	189.452	1.5921	2.73046e-07
OBSCN	ENSG00000154358.19	protein_coding	-0.0105782	0.807501	0.834515	3169.52	1.04387	1.40806e-08
MAFF	ENSG00000185022.11	protein_coding	-0.0137256	0.751889	0.782319	447.092	1.94316	7.34415e-12
STBD1	ENSG00000118804.8	protein_coding	-0.0153528	0.723612	0.75721	110.159	1.04109	0.006509
IGFBP6	ENSG00000167779.7	protein_coding	-0.0174412	0.687871	0.723511	4468.36	0.680775	1.08852e-05
HLA-B	ENSG00000234745.9	protein_coding	-0.0200619	0.643992	0.683751	1746.72	0.902385	8.79696e-08
PSAP	ENSG00000197746.13	protein_coding	-0.0202567	0.640777	0.680753	74826.5	0.676278	6.54079e-07
PGM1	ENSG00000079739.15	protein_coding	-0.0219549	0.613039	0.654801	6176.12	0.758024	1.1953e-05
NRSN2-AS1	ENSG00000225377.5	antisense	-0.0220755	0.61109	0.652823	487.155	0.698702	0.0180261
HK1	ENSG00000156515.21	protein_coding	-0.0223101	0.607305	0.649344	8540.83	0.814781	0.000179892
CTD-3252C9.4	ENSG00000267519.3	lincRNA	-0.0235971	0.586732	0.630694	671.221	1.1472	8.16477e-07
SH3D21	ENSG00000214193.9	protein_coding	-0.0245985	0.57095	0.61574	205.359	1.98755	3.19616e-11
KRT80	ENSG00000167767.13	protein_coding	-0.0250475	0.56394	0.609299	4273.29	0.736443	0.00015053
PPP1R15A	ENSG00000087074.7	protein_coding	-0.0265128	0.541354	0.587199	2197.77	0.680199	0.000196167
GABARAPL1	ENSG00000139112.10	protein_coding	-0.0270362	0.533398	0.579221	3659.36	1.13114	2.47953e-13
CTIF	ENSG00000134030.13	protein_coding	-0.0279769	0.519246	0.565354	2463.29	1.07491	2.76288e-11
TMEM38A	ENSG00000072954.6	protein_coding	-0.0289337	0.505055	0.551593	168.594	1.07206	0.0012751
GADD45B	ENSG00000099860.8	protein_coding	-0.0289372	0.505003	0.551581	1159.87	0.927919	0.000205331
IGFBP3	ENSG00000146674.14	protein_coding	-0.0306475	0.480153	0.527512	45776.8	1.6456	0.00043945
PCED1B	ENSG00000179715.12	protein_coding	-0.0314475	0.468761	0.516299	6234.16	1.29038	2.4817e-14
PIM1	ENSG00000137193.13	protein_coding	-0.0335836	0.439087	0.487352	1902.99	0.81656	3.176e-05
ZNF821	ENSG00000102984.14	protein_coding	-0.0340106	0.433288	0.481629	437.304	0.908586	0.00135852
FBLIM1	ENSG00000162458.12	protein_coding	-0.0346775	0.424318	0.472531	2728.91	0.761125	1.45704e-05
S100A4	ENSG00000196154.11	protein_coding	-0.0360959	0.405605	0.453772	36811.7	0.906592	0.000183556
DSP	ENSG00000096696.13	protein_coding	-0.0375565	0.386858	0.434708	27944	0.903097	2.22295e-06
LOXL2	ENSG00000134013.15	protein_coding	-0.0379635	0.38173	0.429303	25824.3	3.26104	1.06691e-125
LINC00963	ENSG00000204054.12	processed_transcript	-0.0383128	0.377363	0.424852	7215.49	1.16792	2.03528e-17
DDR1	ENSG00000204580.11	protein_coding	-0.0383331	0.377109	0.424614	7016.19	0.625341	9.53039e-05
DDIT4	ENSG00000168209.4	protein_coding	-0.0391124	0.36748	0.414832	30199.5	1.76738	2.76221e-34
STC1	ENSG00000159167.11	protein_coding	-0.0396871	0.360477	0.407814	4987.48	2.3901	9.13832e-25
NDRG1	ENSG00000104419.14	protein_coding	-0.0412111	0.342315	0.389421	26223.5	3.79655	2.1912e-60
LDHAP4	ENSG00000214110.3	processed_pseudogene	-0.0427106	0.325024	0.371252	780.468	1.54437	9.91629e-14
PDE9A	ENSG00000160191.17	protein_coding	-0.0443377	0.306916	0.352627	689.79	1.3023	1.81684e-09
N4BP3	ENSG00000145911.5	protein_coding	-0.0444687	0.305488	0.351255	80.4082	0.996121	0.0208296
SAP30	ENSG00000164105.3	protein_coding	-0.0444745	0.305424	0.351212	968.187	0.768795	0.000258834
SMYD2	ENSG00000143499.13	protein_coding	-0.0444884	0.305273	0.351068	3260.63	0.810872	3.44989e-07
MT1X	ENSG00000187193.8	protein_coding	-0.0461869	0.28716	0.332076	2143.84	2.94993	4.47133e-61
C15orf48	ENSG00000166920.10	protein_coding	-0.0489724	0.25905	0.302367	423.873	1.93333	5.01902e-07
EGLN3	ENSG00000129521.13	protein_coding	-0.0515391	0.234885	0.276432	9470.62	3.64079	2.12535e-74
S100A6	ENSG00000197956.9	protein_coding	-0.0516869	0.233544	0.275093	66925.6	0.585126	0.0119354
FER1L4	ENSG00000088340.15	unitary_pseudogene	-0.052468	0.226545	0.26755	1446.14	1.93629	2.88373e-29
CA9	ENSG00000107159.12	protein_coding	-0.053089	0.221088	0.261723	6655.63	2.01531	7.40865e-07
KDM4B	ENSG00000127663.14	protein_coding	-0.0538327	0.214678	0.254805	1857.23	1.23073	5.30093e-14
LINC00957	ENSG00000235314.1	lincRNA	-0.0540934	0.212462	0.252396	32.3445	1.10518	0.031712
PPP1R13L	ENSG00000104881.14	protein_coding	-0.0559921	0.196823	0.235622	653.666	1.32833	6.0945e-11
TNIP1	ENSG00000145901.14	protein_coding	-0.0564282	0.193353	0.231941	8048.56	1.08213	1.8208e-09
SYNGR3	ENSG00000127561.14	protein_coding	-0.0607426	0.161408	0.196272	1007.98	1.81	4.22109e-16
BFSP1	ENSG00000125864.11	protein_coding	-0.0623126	0.150827	0.184485	1236.54	1.38675	4.69648e-07
TBC1D9B	ENSG00000197226.12	protein_coding	-0.0634585	0.143443	0.176156	13291.3	0.687229	4.63204e-05
ZSWIM4	ENSG00000132003.9	protein_coding	-0.0636397	0.142301	0.174941	660.247	0.841486	0.00058144
RP11-465N4.5	ENSG00000273478.1	antisense	-0.0652926	0.132204	0.16344	161.072	0.923907	0.0123971
VEGFA	ENSG00000112715.20	protein_coding	-0.0677243	0.118368	0.147455	7527.27	2.159	2.74824e-43
SHC2	ENSG00000129946.10	protein_coding	-0.0685327	0.114028	0.142482	369.547	1.82778	4.94151e-08
C2orf15	ENSG00000273045.5	protein_coding	-0.0696277	0.10835	0.136042	190.37	0.701724	0.0438764
PLIN2	ENSG00000147872.9	protein_coding	-0.0696884	0.108042	0.135706	9680.08	2.44621	1.13488e-40
KCTD11	ENSG00000213859.4	protein_coding	-0.0697913	0.107521	0.135078	1518.17	1.56412	1.71933e-17
PPP2R5B	ENSG00000068971.13	protein_coding	-0.0713804	0.0997278	0.125942	1169.68	1.33432	1.80215e-10
NDRG4	ENSG00000103034.14	protein_coding	-0.0722946	0.0954518	0.120882	2520.26	1.13855	1.56165e-06
COL6A2	ENSG00000142173.14	protein_coding	-0.0737911	0.08877	0.112992	1011.08	0.638309	0.00577962
FBXO2	ENSG00000116661.9	protein_coding	-0.0755527	0.0813919	0.104151	1341.95	1.95297	4.10238e-10
PPP1R18	ENSG00000146112.11	protein_coding	-0.0796564	0.0661193	0.0858527	1962.63	0.70215	0.000265516
COL6A1	ENSG00000142156.14	protein_coding	-0.079772	0.0657258	0.0853664	1222.36	0.789316	5.59349e-05
RAB6B	ENSG00000154917.10	protein_coding	-0.0842632	0.0518641	0.0685333	586.934	1.51854	8.04838e-11
CACNB3	ENSG00000167535.7	protein_coding	-0.0846723	0.0507328	0.0671529	1787.28	0.953734	1.04695e-08
PPP1R3E	ENSG00000235194.8	protein_coding	-0.0886846	0.0406905	0.0546279	880.055	0.723214	0.000462942
CIART	ENSG00000159208.15	protein_coding	-0.0952935	0.0278165	0.0383264	53.8487	1.36195	0.00314325
GPR157	ENSG00000180758.11	protein_coding	-0.097313	0.0246589	0.034245	993.943	0.646739	0.00112373
IER3	ENSG00000137331.11	protein_coding	-0.0974209	0.0244993	0.0340408	8556.81	1.49414	1.70557e-11
ALDOC	ENSG00000109107.13	protein_coding	-0.101402	0.0192023	0.0270765	2699.57	2.38698	6.08553e-08
LINC00152	ENSG00000222041.10	lincRNA	-0.101628	0.0189331	0.0267332	928.617	0.758851	0.000390463
AC093673.5	ENSG00000232533.1	antisense	-0.103239	0.0171144	0.0242821	510.459	1.17909	1.56825e-05
BNIP3	ENSG00000176171.11	protein_coding	-0.103302	0.0170466	0.0241935	8841.93	2.12496	4.25748e-59
FAM57A	ENSG00000167695.14	protein_coding	-0.104415	0.0158848	0.0226422	2112.75	0.887209	2.7263e-07
PGK1	ENSG00000102144.13	protein_coding	-0.105713	0.0146183	0.020941	156502	2.26842	8.27391e-63
TMEM74B	ENSG00000125895.5	protein_coding	-0.108316	0.012344	0.017842	615.365	1.3291	3.07468e-08
ADM	ENSG00000148926.9	protein_coding	-0.111077	0.0102779	0.0150045	6800.51	2.63729	7.29021e-51
CEBPD	ENSG00000221869.4	protein_coding	-0.111544	0.00996053	0.0145606	4737.77	1.15265	3.10186e-09
ZYX	ENSG00000159840.15	protein_coding	-0.114112	0.00836658	0.0123685	2773.96	0.658498	4.2435e-05
HLA-C	ENSG00000204525.15	protein_coding	-0.114147	0.00834615	0.0123396	3088.13	0.909992	7.77219e-08
C8orf58	ENSG00000241852.9	protein_coding	-0.115202	0.00776143	0.0115269	1738.39	2.37989	4.37491e-24
FAM129B	ENSG00000136830.11	protein_coding	-0.116345	0.00716973	0.0106928	18265.4	0.765315	4.11022e-08
TBX6	ENSG00000149922.10	protein_coding	-0.119977	0.00554723	0.00841311	69.5253	1.3387	0.00349732
MAPK8IP3	ENSG00000138834.12	protein_coding	-0.122494	0.00462543	0.00709664	4824.33	0.90565	1.81619e-07
JUNB	ENSG00000171223.5	protein_coding	-0.123564	0.00427724	0.00658863	5059.62	1.00115	2.76288e-11
COL7A1	ENSG00000114270.15	protein_coding	-0.125039	0.00383632	0.00595702	20440.2	1.58869	1.99021e-21
FAM219A	ENSG00000164970.14	protein_coding	-0.126641	0.00340406	0.00532192	1516.92	1.23333	1.44772e-12
PYGL	ENSG00000100504.16	protein_coding	-0.12698	0.00331855	0.00519545	9806.76	0.860641	2.32435e-08
TPI1P1	ENSG00000226415.1	processed_pseudogene	-0.127618	0.00316281	0.00496777	244.292	1.0221	0.00122195
RP5-1187M17.10	ENSG00000088899.14	protein_coding	-0.127624	0.00316144	0.00496654	1296.69	1.46452	2.6059e-14
LRRC75B	ENSG00000178026.12	protein_coding	-0.130057	0.00262689	0.00417458	781.379	0.643686	0.0046448
EFNA1	ENSG00000169242.11	protein_coding	-0.134476	0.00186152	0.00301579	1716.39	1.25327	2.9049e-10
ENO2	ENSG00000111674.8	protein_coding	-0.134648	0.00183635	0.00297786	7035.11	2.13919	1.92719e-48
MIR210HG	ENSG00000247095.2	lincRNA	-0.138587	0.00133893	0.00220622	737.865	2.77958	4.6017e-31
CHRD	ENSG00000090539.15	protein_coding	-0.13868	0.00132886	0.00219069	82.1477	1.80356	1.94834e-05
MYO7A	ENSG00000137474.19	protein_coding	-0.139912	0.00120166	0.00199121	685.233	0.865963	0.00643825
CMB9-22P13.1	ENSG00000173727.11	lincRNA	-0.141439	0.00105966	0.00176785	870.767	1.84876	4.37561e-09
CARHSP1	ENSG00000153048.10	protein_coding	-0.141812	0.00102744	0.00171664	8058.78	1.12236	3.50789e-10
SHB	ENSG00000107338.9	protein_coding	-0.142461	0.000973504	0.00163157	1584.5	1.32885	8.58658e-08
FBXL8	ENSG00000135722.8	protein_coding	-0.145002	0.000786435	0.00133512	316.626	0.698951	0.0131121
MPI	ENSG00000178802.17	protein_coding	-0.147119	0.000656599	0.0011266	5977.22	0.974995	1.71765e-09
RP11-465N4.4	ENSG00000234678.1	antisense	-0.148102	0.000603362	0.00104001	681.87	1.13498	5.71356e-08
GAPDHP1	ENSG00000228232.1	processed_pseudogene	-0.14889	0.000563574	0.000974542	89.4154	1.09225	0.0080466
ANGPTL4	ENSG00000167772.11	protein_coding	-0.149037	0.000556457	0.000963345	6547.97	4.29167	8.48637e-77
LDHA	ENSG00000134333.13	protein_coding	-0.156223	0.000294076	0.000526947	149052	1.37021	3.47927e-26
RELT	ENSG00000054967.12	protein_coding	-0.156767	0.000279874	0.000502567	904.498	0.621273	0.00949119
WDR54	ENSG00000005448.16	protein_coding	-0.159398	0.000219887	0.000400334	3167.21	0.849722	5.69305e-08
LPIN3	ENSG00000132793.11	protein_coding	-0.159918	0.00020956	0.000382488	2483.3	0.927216	3.04287e-06
CAPN12	ENSG00000182472.8	protein_coding	-0.160582	0.000197012	0.000361122	560.218	1.08605	8.05311e-05
STC2	ENSG00000113739.10	protein_coding	-0.161746	0.000176727	0.000325442	5985.47	3.46879	1.81088e-108
PHC2	ENSG00000134686.16	protein_coding	-0.162514	0.000164433	0.000304191	3039.46	0.693594	0.00036048
GAL3ST1	ENSG00000128242.12	protein_coding	-0.164872	0.000131509	0.000245487	3825.46	2.17325	6.51461e-26
SPINT1	ENSG00000166145.14	protein_coding	-0.166446	0.000113088	0.000212808	141.111	0.788165	0.0494965
TRAFD1	ENSG00000135148.11	protein_coding	-0.168254	9.49352e-05	0.000180282	3835.54	0.812432	0.000127428
UBC	ENSG00000150991.14	protein_coding	-0.168678	9.10909e-05	0.00017347	53207.7	0.77781	2.39553e-08
KIF3C	ENSG00000084731.13	protein_coding	-0.168754	9.04224e-05	0.000172245	6308.83	0.718665	0.00732186
PGAM1	ENSG00000171314.8	protein_coding	-0.169751	8.20155e-05	0.000157073	5593.61	1.18432	6.5696e-17
MEX3D	ENSG00000181588.16	protein_coding	-0.173679	5.5554e-05	0.000108567	1174.46	0.777853	2.49927e-05
RP11-783K16.5	ENSG00000256940.1	antisense	-0.174144	5.30174e-05	0.000103941	245.597	0.921111	0.00190872
PLXNA3	ENSG00000130827.6	protein_coding	-0.17886	3.27951e-05	6.58731e-05	996.445	1.24483	2.14827e-07
HILPDA	ENSG00000135245.9	protein_coding	-0.178887	3.27019e-05	6.56958e-05	9472.44	1.45796	3.83502e-26
PAQR7	ENSG00000182749.5	protein_coding	-0.184152	1.88456e-05	3.88005e-05	947.769	0.628498	0.00122406
RASSF1	ENSG00000068028.17	protein_coding	-0.185177	1.68984e-05	3.50267e-05	603.474	0.659041	0.0036018
SPAG4	ENSG00000061656.9	protein_coding	-0.187376	1.3344e-05	2.79683e-05	641.432	2.6967	6.87106e-39
ANKZF1	ENSG00000163516.13	protein_coding	-0.188301	1.20729e-05	2.54544e-05	3783.28	1.38618	2.46835e-15
IL18BP	ENSG00000137496.17	protein_coding	-0.196062	5.11203e-06	1.12233e-05	764.465	0.691644	0.00187083
VAT1	ENSG00000108828.15	protein_coding	-0.200457	3.09397e-06	6.95332e-06	16296.4	0.788236	1.03524e-05
NOL3	ENSG00000140939.14	protein_coding	-0.200704	3.00697e-06	6.76568e-06	2733.99	1.34684	1.38728e-11
BRSK1	ENSG00000160469.16	protein_coding	-0.203259	2.23347e-06	5.09924e-06	427.446	0.867815	0.00040171
ARID5A	ENSG00000196843.15	protein_coding	-0.205927	1.63065e-06	3.78611e-06	217.603	1.14959	0.00153868
ANKRD9	ENSG00000156381.8	protein_coding	-0.208072	1.26256e-06	2.96788e-06	3203.04	0.922854	8.34218e-07
NAB2	ENSG00000166886.12	protein_coding	-0.208622	1.18176e-06	2.79116e-06	1055.17	0.680685	0.000297581
PFKFB4	ENSG00000114268.11	protein_coding	-0.2109	8.97232e-07	2.14763e-06	2837	3.34023	1.27671e-90
HSD11B1L	ENSG00000167733.13	protein_coding	-0.212451	7.42424e-07	1.79169e-06	212.386	0.846471	0.0119354
DPCD	ENSG00000166171.12	protein_coding	-0.215349	5.19242e-07	1.27219e-06	1079.87	0.7392	0.00016343
SEMA4B	ENSG00000185033.14	protein_coding	-0.22081	2.61164e-07	6.60493e-07	6472.6	0.683722	0.000378853
TMEM102	ENSG00000181284.2	protein_coding	-0.222741	2.03943e-07	5.21544e-07	1022.88	0.827544	0.00226922
SNHG7	ENSG00000233016.6	antisense	-0.229974	7.91585e-08	2.11403e-07	3956.23	0.802546	6.88476e-06
FAM134A	ENSG00000144567.10	protein_coding	-0.230331	7.54911e-08	2.02048e-07	4687.14	0.62891	0.000160639
HSF4	ENSG00000102878.16	protein_coding	-0.2304	7.47972e-08	2.00382e-07	575.568	0.729687	0.00912151
GYS1	ENSG00000104812.14	protein_coding	-0.235588	3.71574e-08	1.02771e-07	5174.35	1.37264	4.02809e-15
MAFK	ENSG00000198517.9	protein_coding	-0.237323	2.92969e-08	8.19707e-08	8157.33	1.48602	4.94347e-14
FAM162A	ENSG00000114023.15	protein_coding	-0.247547	6.95345e-09	2.07635e-08	3824.68	1.9422	1.5313e-35
SCARB1	ENSG00000073060.15	protein_coding	-0.247926	6.58447e-09	1.97052e-08	10551.5	1.04554	2.47837e-08
FBXO44	ENSG00000132879.13	protein_coding	-0.253372	2.9763e-09	9.17354e-09	1650.59	0.704022	0.0017415
DAPK3	ENSG00000167657.11	protein_coding	-0.253513	2.9149e-09	8.98838e-09	2159.1	1.14292	2.83373e-10
DNAJB2	ENSG00000135924.15	protein_coding	-0.260496	1.02403e-09	3.30332e-09	3115.88	1.45677	2.17115e-11
SNTA1	ENSG00000101400.5	protein_coding	-0.26115	9.26975e-10	3.00028e-09	1002.34	1.07962	2.42487e-08
SIRT2	ENSG00000068903.19	protein_coding	-0.262342	7.72539e-10	2.51732e-09	2781.77	0.870635	8.64756e-06
EFNA3	ENSG00000143590.13	protein_coding	-0.263658	6.31135e-10	2.07459e-09	239.258	2.04033	1.19642e-12
DHRS13	ENSG00000167536.13	protein_coding	-0.264268	5.74458e-10	1.89382e-09	1016.97	1.45531	3.47198e-14
PFKP	ENSG00000067057.16	protein_coding	-0.264551	5.49831e-10	1.81573e-09	29491.7	1.38585	1.729e-27
PKM	ENSG00000067225.17	protein_coding	-0.27431	1.17877e-10	4.15065e-10	390940	1.1533	2.41687e-14
HOMER3	ENSG00000051128.18	protein_coding	-0.275543	9.66063e-11	3.43297e-10	863.857	1.20855	3.43357e-06
TBC1D25	ENSG00000068354.15	protein_coding	-0.276878	7.77921e-11	2.7901e-10	1051.96	0.657817	0.00175281
RASSF7	ENSG00000099849.14	protein_coding	-0.28114	3.86568e-11	1.43291e-10	4275.51	1.0185	2.2351e-08
VKORC1	ENSG00000167397.14	protein_coding	-0.282073	3.31131e-11	1.2356e-10	1814.45	0.706123	5.60489e-05
TMSB10	ENSG00000034510.5	protein_coding	-0.292154	5.99667e-12	2.41789e-11	80595.2	0.802844	2.77868e-08
DYRK1B	ENSG00000105204.13	protein_coding	-0.294306	4.12732e-12	1.68845e-11	2384.52	0.639485	0.000142583
ANO9	ENSG00000185101.12	protein_coding	-0.294706	3.84911e-12	1.58424e-11	136.497	0.986812	0.0129182
PHF1	ENSG00000112511.17	protein_coding	-0.297194	2.4875e-12	1.04387e-11	1022.79	0.62939	0.002078
HCFC1R1	ENSG00000103145.10	protein_coding	-0.302138	1.03147e-12	4.49188e-12	4721.75	1.15325	7.32305e-14
JAG2	ENSG00000184916.8	protein_coding	-0.306199	4.94256e-13	2.23533e-12	1135.06	0.885993	5.80652e-06
SLC29A4	ENSG00000164638.10	protein_coding	-0.326949	9.60869e-15	5.23899e-14	6566.98	1.44418	2.2882e-11
ACTG1	ENSG00000184009.9	protein_coding	-0.332694	3.05525e-15	1.74697e-14	234075	0.704688	4.48865e-06
CLDN3	ENSG00000165215.6	protein_coding	-0.337002	1.2733e-15	7.58251e-15	268.197	0.723097	0.0344255
ENO1	ENSG00000074800.13	protein_coding	-0.340498	6.19549e-16	3.81914e-15	193514	1.04074	1.4678e-10
OGFR	ENSG00000060491.16	protein_coding	-0.3428	3.8362e-16	2.40877e-15	2936.4	0.596252	0.000358228
TSC22D4	ENSG00000166925.8	protein_coding	-0.36044	8.5196e-18	6.43979e-17	1938.56	0.659901	0.0015901
NCKIPSD	ENSG00000213672.7	protein_coding	-0.365283	2.87153e-18	2.31299e-17	1350.84	0.763172	5.3345e-05
ZNF581	ENSG00000171425.9	protein_coding	-0.366329	2.26435e-18	1.85377e-17	1358.49	0.9056	2.29051e-06
MFSD10	ENSG00000109736.14	protein_coding	-0.393335	3.62847e-21	4.08884e-20	2610.15	0.618535	0.000165387
RBCK1	ENSG00000125826.19	protein_coding	-0.396148	1.79216e-21	2.11118e-20	8134.31	0.724675	9.252e-05
BCKDK	ENSG00000103507.13	protein_coding	-0.405473	1.64672e-22	2.20543e-21	2558.69	0.668097	3.4151e-05
ZNF358	ENSG00000198816.5	protein_coding	-0.408936	6.65499e-23	9.37812e-22	1179.94	0.89146	2.61163e-05
GPI	ENSG00000105220.14	protein_coding	-0.410721	4.15487e-23	5.99901e-22	98552.2	1.53498	1.33308e-17
TPI1	ENSG00000111669.14	protein_coding	-0.415338	1.21218e-23	1.84909e-22	74891.5	1.25185	1.01309e-18
ALDOA	ENSG00000149925.16	protein_coding	-0.418505	5.1502e-24	8.31671e-23	87646.4	1.46177	2.17643e-26
PCAT6	ENSG00000228288.6	antisense	-0.420057	3.37393e-24	5.57503e-23	81.2986	1.09395	0.0104792
GAPDH	ENSG00000111640.14	protein_coding	-0.444194	3.51626e-27	8.6636e-26	419954	1.05836	2.13928e-14
AC084117.3	ENSG00000256006.1	sense_intronic	NA	NA	NA	85.1682	1.44535	0.000345792
AC093818.1	ENSG00000225205.5	antisense	NA	NA	NA	110.842	1.94043	3.8818e-06
ADAM20	ENSG00000134007.3	protein_coding	NA	NA	NA	33.0912	1.13479	0.0280017
ADGRF4	ENSG00000153294.11	protein_coding	NA	NA	NA	662.03	1.27019	2.76576e-08
AK9	ENSG00000155085.15	protein_coding	NA	NA	NA	373.396	0.663843	0.0187705
AL162759.1	ENSG00000235269.1	lincRNA	NA	NA	NA	283.793	0.675692	0.0256756
ANKS1B	ENSG00000185046.18	protein_coding	NA	NA	NA	547.663	0.847826	0.000957357
AP000695.4	ENSG00000233818.1	antisense	NA	NA	NA	83.0281	1.26969	0.00276139
AP001062.7	ENSG00000184441.4	antisense	NA	NA	NA	224.128	1.54355	5.24599e-07
B3GNT4	ENSG00000176383.8	protein_coding	NA	NA	NA	155.501	0.947402	0.0322009
B4GALNT4	ENSG00000182272.11	protein_coding	NA	NA	NA	1333.82	0.765877	0.00023598
BHLHE40-AS1	ENSG00000235831.6	antisense	NA	NA	NA	92.4812	1.10797	0.00830513
BNIP3P1	ENSG00000197358.9	transcribed_processed_pseudogene	NA	NA	NA	260.914	1.89164	7.93122e-12
BRSK2	ENSG00000174672.15	protein_coding	NA	NA	NA	675.915	0.814403	0.000197652
C1orf145	ENSG00000162913.9	protein_coding	NA	NA	NA	180.553	1.03062	0.00169248
C2orf82	ENSG00000182600.9	protein_coding	NA	NA	NA	975.243	1.31244	4.98823e-08
CASKIN1	ENSG00000167971.15	protein_coding	NA	NA	NA	156.033	0.711374	0.0485475
CCDC183	ENSG00000213213.13	protein_coding	NA	NA	NA	185.822	1.55288	2.05992e-05
CCDC85A	ENSG00000055813.5	protein_coding	NA	NA	NA	295.66	1.04785	8.7753e-05
CELF5	ENSG00000161082.12	protein_coding	NA	NA	NA	146.398	1.04551	0.00480258
CERS1	ENSG00000223802.7	protein_coding	NA	NA	NA	82.9444	1.58713	0.00023127
DARS-AS1	ENSG00000231890.7	antisense	NA	NA	NA	190.982	2.46419	4.40499e-14
DMRTA1	ENSG00000176399.3	protein_coding	NA	NA	NA	748.528	0.812423	0.000187817
DNAH11	ENSG00000105877.17	protein_coding	NA	NA	NA	352.95	2.82998	3.94374e-20
DPYSL4	ENSG00000151640.12	protein_coding	NA	NA	NA	1324.09	1.49895	3.25062e-15
EDN2	ENSG00000127129.9	protein_coding	NA	NA	NA	185.607	2.26594	6.20221e-09
EEF1A2	ENSG00000101210.10	protein_coding	NA	NA	NA	7497.34	0.787978	3.67281e-05
EMILIN3	ENSG00000183798.4	protein_coding	NA	NA	NA	72.9994	1.56064	0.00127503
ENO1-IT1	ENSG00000236269.1	sense_intronic	NA	NA	NA	236.642	1.16783	0.000151031
FAM229A	ENSG00000225828.1	protein_coding	NA	NA	NA	512.77	0.978214	2.36548e-05
FTX	ENSG00000230590.7	lincRNA	NA	NA	NA	1798	0.608023	0.000400133
GAPDHP65	ENSG00000235587.2	processed_pseudogene	NA	NA	NA	63.5311	0.935883	0.0425051
GCOM1	ENSG00000137878.16	protein_coding	NA	NA	NA	92.8741	1.54725	0.000816985
GJB3	ENSG00000188910.7	protein_coding	NA	NA	NA	226.203	2.39096	4.52933e-10
GNRH1	ENSG00000147437.9	protein_coding	NA	NA	NA	187.215	0.787	0.0198956
GPR146	ENSG00000164849.8	protein_coding	NA	NA	NA	251.984	2.46774	4.73248e-17
GRIN3B	ENSG00000116032.5	protein_coding	NA	NA	NA	222.712	1.33234	1.82766e-05
GTF2IP7	ENSG00000227038.2	transcribed_unprocessed_pseudogene	NA	NA	NA	320.236	1.19953	2.42994e-05
HIF1A-AS2	ENSG00000258667.1	lincRNA	NA	NA	NA	113.628	3.00858	2.49721e-14
INHA	ENSG00000123999.4	protein_coding	NA	NA	NA	245.272	2.72173	2.07459e-13
JPH2	ENSG00000149596.6	protein_coding	NA	NA	NA	406.052	1.17343	5.68087e-06
KIAA1683	ENSG00000130518.16	protein_coding	NA	NA	NA	463.451	1.33887	1.82378e-09
L1CAM	ENSG00000198910.12	protein_coding	NA	NA	NA	404.567	0.735304	0.0197998
LDHAP2	ENSG00000235674.2	processed_pseudogene	NA	NA	NA	143.991	1.16075	0.00167016
LDHAP3	ENSG00000236090.2	processed_pseudogene	NA	NA	NA	35.3561	1.02971	0.0497243
LINC00472	ENSG00000233237.6	lincRNA	NA	NA	NA	2077.04	0.918836	5.65454e-05
LINC00482	ENSG00000185168.5	lincRNA	NA	NA	NA	241.139	1.1956	4.97344e-05
LINC00704	ENSG00000231298.6	lincRNA	NA	NA	NA	172.269	1.65024	2.74512e-05
LINC00887	ENSG00000214145.6	lincRNA	NA	NA	NA	198.258	0.761275	0.0469652
MAPT	ENSG00000186868.15	protein_coding	NA	NA	NA	234.737	0.829301	0.00541727
MBNL2	ENSG00000139793.18	protein_coding	NA	NA	NA	5554.33	1.03033	9.36057e-06
MIF	ENSG00000240972.1	protein_coding	NA	NA	NA	1083.81	0.809757	0.000677937
MIR193BHG	ENSG00000262454.2	lincRNA	NA	NA	NA	541.589	1.66012	2.44603e-11
MKRN5P	ENSG00000224430.2	processed_pseudogene	NA	NA	NA	69.5403	1.11199	0.0116802
NIM1K	ENSG00000177453.7	protein_coding	NA	NA	NA	55.8793	1.54888	0.000604387
OXTR	ENSG00000180914.10	protein_coding	NA	NA	NA	562.963	1.12984	9.71156e-07
PDE8B	ENSG00000113231.13	protein_coding	NA	NA	NA	2611.71	0.966712	5.912e-07
PKD1L2	ENSG00000166473.16	polymorphic_pseudogene	NA	NA	NA	1534.56	1.48732	0.00147372
PNCK	ENSG00000130822.15	protein_coding	NA	NA	NA	32.9246	1.35992	0.00400821
PPFIA4	ENSG00000143847.15	protein_coding	NA	NA	NA	1149.3	4.4136	2.03843e-85
PPP1R3G	ENSG00000219607.3	protein_coding	NA	NA	NA	460.245	2.41788	1.40307e-23
PRELID2	ENSG00000186314.11	protein_coding	NA	NA	NA	1194.88	0.921255	1.62966e-07
PRPH	ENSG00000135406.13	protein_coding	NA	NA	NA	66.3194	1.04049	0.0223045
PRSS53	ENSG00000151006.7	protein_coding	NA	NA	NA	169.319	0.787481	0.0264255
PRTN3	ENSG00000196415.9	protein_coding	NA	NA	NA	134.734	1.46367	0.000625412
RAPGEF4	ENSG00000091428.17	protein_coding	NA	NA	NA	258.062	1.00167	0.000570241
RP11-118K6.3	ENSG00000273001.1	lincRNA	NA	NA	NA	35.4905	1.29926	0.00916068
RP11-1334A24.5	ENSG00000279821.1	TEC	NA	NA	NA	112.372	1.70211	4.16021e-06
RP11-138A9.1	ENSG00000271204.1	lincRNA	NA	NA	NA	342.355	0.895488	0.00358542
RP11-274H2.3	ENSG00000240032.1	antisense	NA	NA	NA	221.392	2.65959	9.448e-19
RP11-274H2.5	ENSG00000261051.1	sense_overlapping	NA	NA	NA	362.505	2.27234	1.07483e-14
RP11-351I24.1	ENSG00000254554.1	antisense	NA	NA	NA	85.806	1.18833	0.00448651
RP11-420A23.1	ENSG00000251432.6	lincRNA	NA	NA	NA	831.919	0.666341	0.00961543
RP11-446N19.1	ENSG00000272369.1	lincRNA	NA	NA	NA	119.711	1.39364	0.000139675
RP11-474P2.6	ENSG00000275481.1	lincRNA	NA	NA	NA	335.852	1.11112	1.0161e-05
RP11-474P2.7	ENSG00000278896.1	TEC	NA	NA	NA	123.635	1.24949	0.000690789
RP11-496I9.1	ENSG00000254815.5	antisense	NA	NA	NA	477.468	2.01266	4.34511e-12
RP11-563J2.3	ENSG00000212743.2	lincRNA	NA	NA	NA	45.0615	1.06097	0.0400598
RP11-66B24.7	ENSG00000272808.3	processed_transcript	NA	NA	NA	164.349	0.907699	0.00738074
RP11-798M19.6	ENSG00000272870.1	antisense	NA	NA	NA	128.752	1.94541	3.0823e-07
RP11-96H19.1	ENSG00000257261.5	lincRNA	NA	NA	NA	272.325	1.21891	2.22325e-05
RP13-516M14.8	ENSG00000280407.2	TEC	NA	NA	NA	64.7853	1.2059	0.0104671
RP3-449O17.1	ENSG00000244627.5	transcribed_unprocessed_pseudogene	NA	NA	NA	152.214	0.754968	0.0396627
RP5-940J5.3	ENSG00000255966.1	antisense	NA	NA	NA	75.4477	1.28121	0.00268258
SCN5A	ENSG00000183873.15	protein_coding	NA	NA	NA	113.05	1.73539	5.75693e-05
SDAD1P1	ENSG00000228451.3	transcribed_processed_pseudogene	NA	NA	NA	493.468	1.70434	2.12343e-14
SEMA5B	ENSG00000082684.14	protein_coding	NA	NA	NA	83.3112	3.35192	5.17433e-12
SLC2A14	ENSG00000173262.11	protein_coding	NA	NA	NA	190.815	2.05568	2.24236e-06
SLC6A16	ENSG00000063127.15	protein_coding	NA	NA	NA	379.15	0.641299	0.0281391
SPACA6P-AS	ENSG00000269959.1	lincRNA	NA	NA	NA	334.232	0.707789	0.010541
SPTB	ENSG00000070182.17	protein_coding	NA	NA	NA	1253.48	0.950515	0.000421359
SRRM3	ENSG00000177679.15	protein_coding	NA	NA	NA	634.077	1.28994	5.34288e-09
TBC1D3L	ENSG00000274512.4	protein_coding	NA	NA	NA	137.782	1.34379	0.000139113
TCAF2	ENSG00000170379.19	protein_coding	NA	NA	NA	104.241	2.24141	3.12652e-08
TFR2	ENSG00000106327.12	protein_coding	NA	NA	NA	270.376	0.700516	0.0223161
TMEM105	ENSG00000185332.6	protein_coding	NA	NA	NA	207.619	1.1784	0.000111613
TNNT1	ENSG00000105048.16	protein_coding	NA	NA	NA	5456.85	1.226	3.81322e-16
UBE2Q2P1	ENSG00000189136.8	transcribed_unprocessed_pseudogene	NA	NA	NA	376.336	0.605316	0.0277562
UCN2	ENSG00000145040.3	protein_coding	NA	NA	NA	249.42	2.37778	1.09465e-14
UPK1A	ENSG00000105668.7	protein_coding	NA	NA	NA	247.63	3.37118	8.36424e-21
UPK1A-AS1	ENSG00000226510.1	antisense	NA	NA	NA	95.4048	3.32652	8.78612e-15
URAHP	ENSG00000222019.7	transcribed_unprocessed_pseudogene	NA	NA	NA	157.16	0.842545	0.0316799
VTCN1	ENSG00000134258.16	protein_coding	NA	NA	NA	265.3	0.917987	0.041401
ZMAT4	ENSG00000165061.14	protein_coding	NA	NA	NA	565.973	0.629015	0.0331381
ZNF571	ENSG00000180479.13	protein_coding	NA	NA	NA	259.107	0.682092	0.0297025
