# Supplementary material
Source: HighWire-hosted journal article supplement (doi:10.1101/rna.073353.119)
Supplement: Supplemental_Tab_S9.xlsx [file Supplemental_Tab_S9.xlsx]

## Sheet: Legend
Supplementary Table 9. Alternative splicing events after MBNL2 knockdown in MCF-7 cells under hypoxia.
2,074 significant alternative splicing events were detected using rMATS considering only reads mapped to splice junctions, and filtered for a false discovery rate (FDR) < 0.05
and an absolute change in ‘percent spliced in’ (|ΔPSI|) ≥ 10% (referred to as inclusion level difference, ‘IncLevelDifference’) (for additional criteria, see Material and Methods).
Information is given for cassette exons (CE), mutually exclusive exons (MXE), alternative 5’ splice sites (A5SS), alternative 3’ splice sites (A3SS), and retained introns (RI) that are regulated after MBNL2 knockdown (black)
and that are shared between MBNL2 knockdown and the hypoxia response in MCF-7 cells (red).
0-based coordinates are given the alternative exon (exonStart/End), and the upstream (upstreamES/E) and downstream exons (downstreamES/E).
IJC and SJC provide comma-separated numbers of inclusion and skipping junctions for all replicates of a given sample.

## Sheet: siMBNL2_CE
GENCODE_GeneID	geneSymbol	chr	strand	exonStart_0base	exonEnd	upstreamES	upstreamEE	downstreamES	downstreamEE	IJC_SAMPLE_1	SJC_SAMPLE_1	IJC_SAMPLE_2	SJC_SAMPLE_2	FDR	IncLevel1	IncLevel2	siMBNL2.IncLevelDifference	MCF-7.IncLevelDifference
ENSG00000000419.12	DPM1	chr20	-	50941104	50941209	50940864	50940955	50942030	50942126	74100	3,4	88,78	18,19	0.000263393	0.925,0.926	0.71,0.672	0.234	-0.279
ENSG00000001617.11	SEMA3F	chr3	+	50175095	50175188	50174230	50174350	50176767	50176861	96101	31,33	35,21	31,17	0.00756801	0.608,0.605	0.361,0.382	0.235	NA
ENSG00000002919.14	SNX11	chr17	+	48110707	48110767	48107557	48107838	48112030	48112085	11,13	31,36	5,0	32,23	0.0279726	0.166,0.168	0.08,0.0	0.127	NA
ENSG00000003096.13	KLHL13	chrX	-	118028423	118028497	117945433	117945575	118116507	118116865	5,2	10,16	0,0	9,8	0.0240011	0.202,0.06	0.0,0.0	0.131	NA
ENSG00000003756.16	RBM5	chr3	+	50100531	50100605	50099981	50100051	50103082	50103166	50,62	14,12	28,16	18,16	0.0109428	0.644,0.724	0.441,0.336	0.295	-0.387
ENSG00000003756.16	RBM5	chr3	+	50104247	50104308	50102336	50103166	50105076	50105142	177172	10,11	84,25	38,54	7.05131e-07	0.908,0.897	0.551,0.205	0.525	-0.28
ENSG00000003989.16	SLC7A2	chr8	+	17502256	17502302	17497087	17497237	17543317	17543715	51,46	77100	10,9	73,64	4.28253e-05	0.293,0.223	0.079,0.081	0.178	-0.13
ENSG00000003989.16	SLC7A2	chr8	+	17554559	17554699	17551763	17551986	17558294	17558397	356419	2,5	232,85	4,20	0.0010005	0.989,0.977	0.967,0.68	0.159	NA
ENSG00000004455.16	AK2	chr1	-	33021592	33021703	33014521	33014594	33024441	33024567	7,11	0,0	15,11	3,6	0.000307178	1.0,1.0	0.714,0.478	0.404	NA
ENSG00000004534.14	RBM6	chr3	+	49999439	49999513	49975322	49975392	50048244	50048319	33,36	29,25	21,22	31,46	0.0499405	0.366,0.422	0.256,0.195	0.169	NA
ENSG00000004766.15	VPS50	chr7	+	93252652	93252775	93239865	93239934	93253859	93253931	41,48	0,0	35,13	1,4	0.0410934	1.0,1.0	0.946,0.619	0.218	NA
ENSG00000004864.13	SLC25A13	chr7	-	96189580	96189674	96189293	96189378	96191108	96191247	85,91	0,4	39,10	4,5	0.0202962	1.0,0.919	0.83,0.5	0.294	-0.176
ENSG00000005448.16	WDR54	chr2	+	74424874	74424975	74423854	74423982	74425074	74425237	532655	17,10	419498	54,77	0	0.94,0.97	0.795,0.764	0.175	NA
ENSG00000005483.19	KMT2E	chr7	+	105066726	105066807	105063350	105063580	105073618	105073677	199221	1,2	187114	7,21	2.73168e-05	0.99,0.982	0.93,0.731	0.155	NA
ENSG00000005483.19	KMT2E	chr7	+	105038125	105038199	105014217	105014535	105040838	105041023	18,21	28,58	7,1	54,41	0.000411284	0.246,0.155	0.062,0.012	0.164	NA
ENSG00000005483.19	KMT2E	chr7	+	105062163	105062278	105040838	105041023	105063350	105063580	187188	3,5	173103	17,35	3.54116e-05	0.969,0.949	0.836,0.595	0.243	NA
ENSG00000005486.16	RHBDD2	chr7	+	75881364	75881486	75879171	75879260	75881828	75882236	16,28	71,41	5,10	59,77	0.00803565	0.101,0.255	0.041,0.061	0.127	NA
ENSG00000005801.16	ZNF195	chr11	-	3373576	3373656	3371576	3371703	3379037	3379126	6,11	3,13	0,1	4,3	0.0096656	0.5,0.297	0.0,0.143	0.327	-0.345
ENSG00000005801.16	ZNF195	chr11	-	3377616	3377900	3373576	3373656	3379037	3379218	7,0	3,7	2,4	0,0	7.76903e-06	0.538,0.0	1.0,1.0	-0.731	NA
ENSG00000005884.17	ITGA3	chr17	+	50076973	50077121	50076624	50076681	50077378	50077447	166177	3,3	151,73	21,6	0.000157776	0.965,0.967	0.782,0.859	0.145	NA
ENSG00000006194.9	ZNF263	chr16	+	3288453	3288570	3283954	3284205	3289392	3291460	40,59	8,11	38,30	16,23	0.0374066	0.714,0.728	0.543,0.395	0.252	-0.309
ENSG00000006625.17	GGCT	chr7	-	30500535	30500681	30498802	30498938	30504568	30504799	255243	48,50	220221	85,92	0.00186837	0.726,0.708	0.564,0.546	0.162	NA
ENSG00000007255.10	TRAPPC6A	chr19	-	45165126	45165194	45164852	45164970	45178092	45178237	340474	86,70	423386	41,40	0.0206071	0.676,0.781	0.845,0.836	-0.112	NA
ENSG00000007541.15	PIGQ	chr16	+	580182	580263	579068	579180	580857	580972	28,21	3,4	30,15	0,0	0.00349995	0.824,0.724	1.0,1.0	-0.226	NA
ENSG00000007866.18	TEAD3	chr6	-	35480311	35480374	35479304	35479316	35484559	35484624	47,38	0,1	34,29	1,8	0.0109827	1.0,0.954	0.949,0.665	0.17	NA
ENSG00000008513.14	ST3GAL1	chr8	-	133499134	133499189	133476522	133476600	133545773	133545926	163158	8,5	243127	25,61	0.00288125	0.922,0.948	0.85,0.548	0.236	-0.107
ENSG00000010244.16	ZNF207	chr17	+	32361467	32361515	32360891	32360967	32362913	32362984	262301	20,39	281157	91184	0.000336066	0.89,0.826	0.655,0.344	0.358	NA
ENSG00000010361.13	FUZ	chr19	-	49812446	49812685	49812279	49812335	49812995	49813284	8,5	5,5	0,0	5,3	0.000372097	0.444,0.333	0.0,0.0	0.389	NA
ENSG00000011021.21	CLCN6	chr1	+	11828457	11828624	11828105	11828219	11829195	11829322	12,29	10,10	56,43	7,0	0.00463862	0.375,0.592	0.8,1.0	-0.417	0.574
ENSG00000011143.16	MKS1	chr17	-	58206464	58206547	58206282	58206380	58207084	58207218	67,78	7,4	45,49	1,0	0.0162113	0.827,0.907	0.957,1.0	-0.111	NA
ENSG00000011258.15	MBTD1	chr17	-	51202021	51202077	51201591	51201696	51202700	51202935	296262	12,24	154,27	30,42	0.00803565	0.934,0.863	0.748,0.271	0.389	-0.118
ENSG00000011304.17	PTBP1	chr19	+	805491	805569	805012	805187	806407	806556	411483	60,76	334209	76107	0.035245	0.774,0.761	0.687,0.494	0.177	NA
ENSG00000011304.17	PTBP1	chr19	+	805512	805569	805012	805187	806407	806556	147181	60,76	101,69	76107	0.00389435	0.584,0.577	0.432,0.27	0.23	NA
ENSG00000011405.13	PIK3C2A	chr11	-	17147516	17147628	17145862	17145942	17148666	17148787	118140	2,5	134,62	12,16	0.00273712	0.967,0.933	0.848,0.66	0.196	NA
ENSG00000011405.13	PIK3C2A	chr11	-	17129299	17129467	17122701	17122813	17131915	17132038	78116	6,9	58,15	18,5	0.00541434	0.867,0.866	0.617,0.6	0.258	NA
ENSG00000011426.10	ANLN	chr7	+	36417079	36417190	36415757	36415884	36419243	36419479	226284	13,41	457312	89103	0.00684004	0.897,0.776	0.72,0.602	0.175	NA
ENSG00000011523.13	CEP68	chr2	+	65073935	65074149	65072883	65072980	65074281	65074484	0,0	15,15	6,6	30,10	0.0033097	0.0,0.0	0.091,0.231	-0.161	NA
ENSG00000011566.14	MAP4K3	chr2	-	39307942	39308005	39299742	39299801	39309460	39309519	35,32	63,80	12,1	77,79	2.58825e-06	0.233,0.18	0.079,0.007	0.164	-0.139
ENSG00000012048.20	BRCA1	chr17	-	43095845	43095922	43091097	43094860	43099774	43099880	11,12	6,8	3,0	9,1	0.0441824	0.478,0.429	0.143,0.0	0.382	NA
ENSG00000012061.15	ERCC1	chr19	-	45414860	45414960	45409613	45409725	45416820	45416897	263292	12,11	186131	17,23	0.00587784	0.916,0.93	0.845,0.74	0.131	NA
ENSG00000012061.15	ERCC1	chr19	-	45413676	45413745	45409667	45409725	45416820	45416897	192217	12,11	119,76	17,23	0.00260411	0.894,0.912	0.786,0.634	0.193	NA
ENSG00000012822.15	CALCOCO1	chr12	-	53724584	53724747	53723620	53723783	53725086	53725266	136140	7,10	48,38	13,21	6.69104e-05	0.907,0.875	0.649,0.475	0.329	-0.301
ENSG00000012822.15	CALCOCO1	chr12	-	53724644	53724747	53723592	53723783	53725086	53725266	300312	7,10	134,90	13,21	0.000111972	0.955,0.94	0.838,0.682	0.188	-0.138
ENSG00000013441.15	CLK1	chr2	-	200860124	200860215	200859679	200859746	200861237	200861466	193323	67,46	4461061	42,18	1.15552e-05	0.59,0.778	0.842,0.967	-0.221	NA
ENSG00000014914.19	MTMR11	chr1	-	149931943	149932014	149930791	149930965	149932263	149932330	51,33	2,1	28,17	4,6	0.0358351	0.93,0.945	0.784,0.594	0.248	NA
ENSG00000015479.17	MATR3	chr5	+	139315696	139315738	139314674	139314736	139316075	139316188	511536	7,8	342222	21,47	1.81766e-08	0.979,0.977	0.913,0.753	0.145	NA
ENSG00000015479.17	MATR3	chr5	+	139307238	139308327	139293647	139293805	139316075	139316188	47,22	0,2	26,34	5,9	0.00468744	1.0,0.846	0.722,0.654	0.235	NA
ENSG00000022840.15	RNF10	chr12	+	120574467	120574537	120566952	120566980	120575630	120575688	3,5	10,20	1,1	18,75	0.012708	0.135,0.115	0.028,0.007	0.107	NA
ENSG00000023287.12	RB1CC1	chr8	-	52660595	52660657	52658872	52658976	52660925	52661007	61112	0,0	59,38	3,5	0.00453447	1.0,1.0	0.916,0.807	0.138	NA
ENSG00000023697.12	DERA	chr12	+	15982307	15982436	15962812	15962947	16032541	16033048	90121	0,1	87,64	4,5	0.0128491	1.0,0.984	0.916,0.865	0.101	NA
ENSG00000023909.9	GCLM	chr1	-	93904522	93904588	93901584	93901669	93909037	93909410	14,18	4,5	5,6	11,5	0.0419557	0.652,0.659	0.196,0.391	0.362	NA
ENSG00000025039.14	RRAGD	chr6	-	89377670	89377813	89364997	89368207	89387294	89387590	10,10	0,0	12,16	4,4	0.000967242	1.0,1.0	0.6,0.667	0.367	NA
ENSG00000028203.17	VEZT	chr12	+	95256549	95256622	95251939	95252071	95262905	95263081	92108	2,5	69,29	9,11	0.00505748	0.959,0.917	0.796,0.574	0.253	NA
ENSG00000028203.17	VEZT	chr12	+	95256549	95256622	95251939	95252071	95257149	95257239	190198	59,70	119,59	91,79	5.4995e-05	0.622,0.591	0.4,0.276	0.269	NA
ENSG00000028310.17	BRD9	chr5	-	868606	868804	865413	865581	870472	870553	21,16	59,49	22,33	10,11	1.22474e-07	0.151,0.14	0.524,0.6	-0.417	0.11
ENSG00000028310.17	BRD9	chr5	-	869244	869404	865413	865581	870472	870575	11,9	59,49	20,12	10,11	2.85406e-05	0.085,0.084	0.5,0.353	-0.342	NA
ENSG00000028310.17	BRD9	chr5	-	869244	869394	865413	865581	870472	870575	17,13	59,49	16,14	10,11	0.000517811	0.126,0.117	0.444,0.389	-0.295	NA
ENSG00000029363.15	BCLAF1	chr6	-	136269140	136269303	136268161	136268339	136269436	136269612	86,74	54,49	113172	47,35	0.0492074	0.443,0.43	0.546,0.711	-0.192	NA
ENSG00000029364.11	SLC39A9	chr14	+	69458362	69458729	69455731	69455866	69461696	69462381	58,85	8,9	58,64	0,0	7.28172e-05	0.784,0.825	1.0,1.0	-0.196	NA
ENSG00000029725.16	RABEP1	chr17	+	5308693	5308822	5282299	5282520	5331948	5332152	152153	1,9	118,89	8,15	0.0394476	0.987,0.895	0.881,0.748	0.127	NA
ENSG00000031003.10	FAM13B	chr5	-	137956476	137956542	137954165	137954376	137959615	137959763	11,5	13,26	1,0	12,13	0.0055481	0.312,0.093	0.043,0.0	0.181	-0.46
ENSG00000032219.18	ARID4A	chr14	+	58304943	58305009	58301579	58301690	58318541	58318621	27,32	1,0	42,34	1,9	0.0224135	0.935,1.0	0.957,0.669	0.155	NA
ENSG00000032444.15	PNPLA6	chr19	+	7541983	7542067	7541521	7541684	7542560	7542670	71106	2,2	55,59	8,7	0.00969027	0.947,0.964	0.775,0.808	0.164	NA
ENSG00000033030.13	ZCCHC8	chr12	-	122489385	122489463	122481990	122482087	122492714	122492789	6,9	0,0	11,16	0,5	0.0343216	1.0,1.0	1.0,0.615	0.193	NA
ENSG00000033030.13	ZCCHC8	chr12	-	122490461	122490567	122489385	122489463	122492714	122492789	94,98	6,9	45,34	10,16	0.0088432	0.887,0.845	0.692,0.515	0.263	NA
ENSG00000033178.12	UBA6	chr4	-	67641150	67641228	67638942	67639124	67644697	67644774	95125	4,7	100,60	23,21	4.56469e-05	0.922,0.899	0.685,0.588	0.274	NA
ENSG00000033867.16	SLC4A7	chr3	-	27409355	27409530	27404829	27404963	27411641	27411748	45,66	7,12	85,52	2,0	0.000163559	0.763,0.733	0.955,1.0	-0.23	0.182
ENSG00000034693.14	PEX3	chr6	+	143485151	143485248	143479075	143479198	143489142	143490010	149149	3,4	164,65	11,21	0.00323146	0.961,0.949	0.882,0.607	0.211	NA
ENSG00000035499.12	DEPDC1B	chr5	-	60599074	60599260	60596911	60597914	60603390	60603567	80,54	4,7	106,73	1,0	0.0027419	0.909,0.794	0.981,1.0	-0.139	NA
ENSG00000035499.12	DEPDC1B	chr5	-	60687724	60687838	60686961	60687227	60700045	60700190	13,3	15,18	6,1	53,30	0.0296534	0.302,0.077	0.054,0.016	0.154	NA
ENSG00000035664.11	DAPK2	chr15	-	63924815	63924861	63912107	63912197	63925940	63926093	184235	20,18	115,80	29,19	0.00413159	0.852,0.891	0.713,0.725	0.152	-0.128
ENSG00000035928.14	RFC1	chr4	-	39323339	39323417	39320464	39320669	39326562	39326640	89125	0,1	85,65	1,8	0.0138341	1.0,0.984	0.977,0.802	0.103	NA
ENSG00000035928.14	RFC1	chr4	-	39321286	39321374	39320382	39320669	39326562	39326640	86109	0,1	85,43	1,8	0.0112607	1.0,0.982	0.977,0.729	0.138	NA
ENSG00000035928.14	RFC1	chr4	-	39326562	39326640	39320382	39320669	39327523	39327756	28,49	0,1	44,50	3,24	0.00113141	1.0,0.961	0.88,0.51	0.285	NA
ENSG00000035928.14	RFC1	chr4	-	39321286	39321374	39320382	39320669	39327523	39327756	83105	0,1	81,42	3,24	0.000567021	1.0,0.981	0.931,0.467	0.291	NA
ENSG00000036054.12	TBC1D23	chr3	+	100311832	100311877	100310402	100310542	100316098	100316187	27,44	67102	21,10	111104	0.00108449	0.203,0.214	0.107,0.057	0.127	-0.169
ENSG00000036054.12	TBC1D23	chr3	+	100290577	100290701	100281741	100281847	100295086	100295211	56,88	0,1	75,57	2,7	0.0163424	1.0,0.978	0.949,0.803	0.113	NA
ENSG00000036549.12	ZZZ3	chr1	-	77639448	77639602	77633181	77633405	77641521	77641655	27,50	0,0	40,34	1,5	0.0244394	1.0,1.0	0.952,0.773	0.137	NA
ENSG00000036549.12	ZZZ3	chr1	-	77641383	77641446	77631849	77633405	77641521	77641655	30,44	0,0	17,14	1,5	0.00367865	1.0,1.0	0.903,0.605	0.246	NA
ENSG00000036549.12	ZZZ3	chr1	-	77641521	77641655	77584516	77584655	77683261	77683403	30,32	0,0	14,8	3,2	0.00472281	1.0,1.0	0.7,0.667	0.317	NA
ENSG00000037042.8	TUBG2	chr17	+	42662972	42663052	42660638	42660707	42663376	42663503	22,35	8,3	34,32	2,0	0.028676	0.579,0.854	0.895,1.0	-0.231	NA
ENSG00000039319.16	ZFYVE16	chr5	+	80448025	80448404	80445262	80445405	80449590	80449713	48,46	0,4	30,14	7,12	0.00269911	1.0,0.852	0.682,0.368	0.401	-0.183
ENSG00000039319.16	ZFYVE16	chr5	+	80427491	80427545	80408025	80408153	80434108	80434217	9,1	5,8	0,0	7,2	0.00734538	0.513,0.068	0.0,0.0	0.29	NA
ENSG00000040531.14	CTNS	chr17	+	3640187	3640267	3637106	3637316	3647443	3647522	17,19	1,4	6,4	0,0	0.0241665	0.895,0.704	1.0,1.0	-0.201	NA
ENSG00000040531.14	CTNS	chr17	+	3648846	3648931	3647443	3647522	3654997	3655101	26,21	1,1	6,3	2,3	0.0327804	0.929,0.913	0.6,0.333	0.455	NA
ENSG00000040933.15	INPP4A	chr2	+	98559462	98559495	98555552	98555808	98563464	98563637	10,25	1,7	19,5	15,12	0.0295025	0.875,0.715	0.47,0.226	0.447	NA
ENSG00000042317.16	SPATA7	chr14	+	88393392	88393488	88391380	88391455	88396155	88396203	52,71	2,4	24,24	14,13	1.42775e-06	0.929,0.899	0.462,0.48	0.443	-0.424
ENSG00000044446.11	PHKA2	chrX	-	18899172	18899226	18897162	18897333	18900669	18900699	25,12	3,5	12,9	0,1	0.0383355	0.83,0.584	1.0,0.841	-0.214	NA
ENSG00000046651.14	OFD1	chrX	+	13763744	13763855	13762343	13762444	13767126	13767284	323306	33,37	264233	67,80	2.66441e-05	0.83,0.805	0.663,0.593	0.19	-0.274
ENSG00000047249.16	ATP6V1H	chr8	-	53811163	53811217	53801798	53801896	53814661	53814766	112137	21,19	70,48	31,21	0.0038223	0.758,0.809	0.57,0.573	0.212	NA
ENSG00000047346.12	FAM214A	chr15	-	52600126	52600235	52593577	52593736	52601085	52601165	359400	7,8	295141	12,24	0.00194803	0.962,0.962	0.925,0.746	0.126	NA
ENSG00000047346.12	FAM214A	chr15	-	52587150	52587219	52584742	52584944	52593577	52593736	257239	6,10	139,46	11,27	0.00923469	0.957,0.926	0.869,0.472	0.271	NA
ENSG00000047365.11	ARAP2	chr4	-	36119649	36119718	36117060	36117135	36121178	36121326	13,15	8,7	2,6	0,0	0.000586359	0.46,0.529	1.0,1.0	-0.505	NA
ENSG00000047579.19	DTNBP1	chr6	-	15652086	15652140	15637743	15637804	15662813	15663007	14,11	0,0	10,4	2,4	0.000824342	1.0,1.0	0.746,0.369	0.443	NA
ENSG00000048028.11	USP28	chr11	-	113834248	113834335	113833419	113833557	113840597	113840757	51,61	0,6	101,45	14,24	0.0258599	1.0,0.836	0.783,0.484	0.284	-0.208
ENSG00000049246.14	PER3	chr1	+	7808892	7808998	7803691	7803848	7809892	7810021	147165	9,9	48,15	12,12	0.00108449	0.891,0.902	0.667,0.385	0.371	NA
ENSG00000049246.14	PER3	chr1	+	7787197	7787246	7785522	7785586	7788044	7788338	10,6	5,6	1,1	6,11	0.00289637	0.549,0.379	0.092,0.053	0.392	NA
ENSG00000049323.15	LTBP1	chr2	+	33134792	33134960	33110581	33110751	33186855	33187080	17,9	0,0	8,11	2,2	0.0263409	1.0,1.0	0.667,0.733	0.3	NA
ENSG00000049541.10	RFC2	chr7	-	74246661	74246763	74243145	74243246	74249011	74249118	169202	7,8	172122	16,27	0.0047074	0.923,0.927	0.843,0.693	0.157	NA
ENSG00000049618.21	ARID1B	chr6	+	157174846	157175005	157174007	157174117	157180968	157181178	48,56	19,36	47,35	8,4	0.00920332	0.558,0.438	0.746,0.814	-0.282	NA
ENSG00000050130.17	JKAMP	chr14	+	59501190	59501267	59498726	59498908	59503853	59504703	140150	4,10	158144	18,77	0.00780739	0.946,0.882	0.814,0.483	0.265	NA
ENSG00000050748.17	MAPK9	chr5	-	180286974	180287067	180280439	180280608	180291847	180292053	9,11	16,21	2,0	12,15	0.0049415	0.22,0.208	0.077,0.0	0.175	-0.281
ENSG00000051180.16	RAD51	chr15	+	40729852	40729974	40729504	40729634	40731054	40731593	46,37	0,1	32,30	1,8	0.0104692	1.0,0.949	0.941,0.652	0.178	NA
ENSG00000051825.14	MPHOSPH9	chr12	-	123163013	123163134	123161135	123161383	123163949	123164090	54,60	0,2	47,22	17,2	0.000930614	1.0,0.938	0.58,0.846	0.256	-0.167
ENSG00000051825.14	MPHOSPH9	chr12	-	123214743	123214834	123210055	123210162	123218375	123218499	49,56	0,1	62,44	3,5	0.0255273	1.0,0.966	0.912,0.815	0.12	NA
ENSG00000051825.14	MPHOSPH9	chr12	-	123203249	123203375	123202623	123203084	123210055	123210162	74,85	12,8	60,27	21,31	0.00654775	0.755,0.842	0.588,0.303	0.353	NA
ENSG00000052723.11	SIKE1	chr1	-	114776345	114776459	114774344	114774372	114779141	114779284	392453	3,16	244,68	19,18	0.000137481	0.985,0.934	0.865,0.654	0.2	NA
ENSG00000053254.15	FOXN3	chr14	-	89190383	89190449	89180758	89180806	89280949	89281014	32,19	25,44	21,6	58,55	0.0468513	0.407,0.188	0.162,0.055	0.189	NA
ENSG00000053254.15	FOXN3	chr14	-	89190386	89190449	89180700	89180806	89280949	89281014	29,19	25,44	16,4	58,55	0.00767947	0.388,0.191	0.131,0.038	0.205	NA
ENSG00000054282.15	SDCCAG8	chr1	+	243489013	243489140	243426426	243426558	243499755	243500092	26,18	2,5	9,2	0,0	0.00587784	0.867,0.643	1.0,1.0	-0.245	NA
ENSG00000054690.13	PLEKHH1	chr14	+	67586809	67586949	67585950	67586097	67587073	67587548	4,4	44,55	10,19	70,35	0.0348783	0.043,0.035	0.067,0.213	-0.101	NA
ENSG00000058453.16	CROCC	chr1	+	16966407	16966571	16966027	16966119	16968202	16968418	62,60	8,2	31,23	1,0	0.0463147	0.795,0.938	0.939,1.0	-0.103	0.188
ENSG00000058668.14	ATP2B4	chr1	+	203702043	203702079	203700797	203700923	203703651	203703813	95103	1,1	44,16	5,6	0.000356973	0.985,0.986	0.857,0.645	0.235	NA
ENSG00000058673.15	ZC3H11A	chr1	+	203796450	203796601	203795653	203795775	203801574	203801628	19,22	3,2	14,9	0,0	0.0383355	0.76,0.846	1.0,1.0	-0.197	NA
ENSG00000060069.16	CTDP1	chr18	+	79736354	79736521	79717809	79718016	79753651	79754510	24,45	0,0	47,22	3,8	0.000980546	1.0,1.0	0.887,0.579	0.267	NA
ENSG00000060069.16	CTDP1	chr18	+	79728906	79729069	79717809	79718016	79753651	79754503	15,32	0,0	26,15	3,8	0.000359212	1.0,1.0	0.813,0.484	0.352	NA
ENSG00000060237.16	WNK1	chr12	+	871264	871348	862082	862270	878214	878361	58,79	23,31	55,15	45,21	0.0236753	0.558,0.56	0.379,0.263	0.238	-0.238
ENSG00000060237.16	WNK1	chr12	+	879572	880031	878214	878361	881691	881789	4,5	32,46	14,20	41,14	0.00721067	0.059,0.052	0.146,0.417	-0.226	NA
ENSG00000060237.16	WNK1	chr12	+	880720	880999	879572	880031	881691	881789	11,15	1,1	5,5	5,8	0.000551486	0.846,0.882	0.333,0.238	0.579	NA
ENSG00000060971.17	ACAA1	chr3	-	38126161	38126341	38125825	38125881	38126509	38126700	136202	35,42	131138	10,10	0.000961661	0.66,0.706	0.868,0.873	-0.188	NA
ENSG00000060971.17	ACAA1	chr3	-	38131595	38131638	38129289	38129388	38131925	38132005	169193	14,23	104,71	19,30	0.0259771	0.886,0.843	0.778,0.603	0.174	NA
ENSG00000061656.9	SPAG4	chr20	+	35618086	35618130	35617135	35617240	35619194	35619310	0,1	8,3	1,4	1,1	0.00794391	0.0,0.175	0.389,0.718	-0.466	NA
ENSG00000061656.9	SPAG4	chr20	+	35618449	35618475	35617135	35617240	35619194	35619310	7,10	8,3	18,8	1,1	0.0277912	0.396,0.714	0.931,0.857	-0.339	NA
ENSG00000062194.15	GPBP1	chr5	+	57237112	57237172	57235965	57236032	57246299	57246484	81,51	209243	25,0	260199	1.63988e-10	0.178,0.105	0.051,0.0	0.116	-0.114
ENSG00000062650.17	WAPL	chr10	-	86497200	86497319	86473877	86473973	86499717	86500743	94,98	0,3	79,28	3,8	0.0255963	1.0,0.942	0.929,0.636	0.189	NA
ENSG00000063046.17	EIF4B	chr12	+	53025226	53025345	53022492	53022627	53027781	53027919	64,90	57,69	39,39	79,74	0.0014226	0.36,0.395	0.198,0.209	0.174	NA
ENSG00000063245.14	EPN1	chr19	+	55689296	55689371	55688869	55688994	55689866	55689950	563630	30,35	351321	39,61	0.000157776	0.904,0.901	0.819,0.726	0.13	NA
ENSG00000064787.12	BCAS1	chr20	-	53957431	53957497	53953431	53953695	53966905	53967073	700651	110164	144,15	97,61	9.84533e-05	0.773,0.68	0.443,0.116	0.447	-0.346
ENSG00000064787.12	BCAS1	chr20	-	53957431	53957497	53953431	53953695	53975388	53975430	451418	84128	88,6	81,45	1.3122e-05	0.742,0.636	0.368,0.067	0.472	-0.262
ENSG00000064787.12	BCAS1	chr20	-	53957431	53957497	53953431	53953695	53985286	53985499	436388	4,10	83,6	6,7	0.0100794	0.983,0.954	0.881,0.315	0.37	NA
ENSG00000065308.4	TRAM2	chr6	-	52535782	52535846	52516627	52516737	52576795	52576915	149170	1,6	235233	14,43	0.000542471	0.988,0.939	0.901,0.747	0.139	NA
ENSG00000065559.14	MAP2K4	chr17	+	12095574	12095694	12020869	12021001	12110374	12110426	3,8	0,0	7,16	1,3	0.0469019	1.0,1.0	0.778,0.727	0.248	NA
ENSG00000065613.13	SLK	chr10	+	104010815	104010908	104008176	104008356	104018159	104018289	167189	8,14	170115	23,25	0.010351	0.913,0.871	0.787,0.697	0.15	NA
ENSG00000065923.9	SLC9A7	chrX	-	46635588	46635648	46631585	46631649	46643235	46643389	130156	47,63	75,52	86,87	4.63259e-08	0.608,0.581	0.328,0.251	0.305	-0.363
ENSG00000066557.5	LRRC40	chr1	-	70187264	70187338	70184784	70184914	70189091	70189273	55,58	0,0	38,13	1,7	0.00368867	1.0,1.0	0.951,0.485	0.282	NA
ENSG00000066933.15	MYO9A	chr15	-	71902940	71903063	71901190	71901340	71903928	71904039	58,82	9,8	47,10	17,10	0.0193674	0.763,0.837	0.58,0.333	0.344	-0.131
ENSG00000067064.10	IDI1	chr10	-	1043998	1044171	1043300	1043393	1048863	1049170	187174	3,1	173101	9,9	0.00398166	0.969,0.989	0.906,0.849	0.102	NA
ENSG00000067066.16	SP100	chr2	+	230464066	230464150	230462434	230462518	230466300	230466354	291332	0,2	194,91	8,10	1.8408e-05	1.0,0.988	0.924,0.82	0.122	NA
ENSG00000067066.16	SP100	chr2	+	230417590	230417665	230415941	230416328	230442936	230443099	111,94	30,27	67,15	34,31	0.0437879	0.651,0.637	0.498,0.196	0.297	NA
ENSG00000067221.13	STOML1	chr15	-	73989107	73989257	73988598	73988802	73990350	73990457	16,15	3,3	17,7	0,0	0.00734218	0.727,0.714	1.0,1.0	-0.28	NA
ENSG00000067836.12	ROGDI	chr16	-	4802381	4802453	4801028	4801585	4802526	4802880	24,17	4,3	14,12	0,0	0.00536005	0.755,0.744	1.0,1.0	-0.25	NA
ENSG00000068400.13	GRIPAP1	chrX	-	48981794	48981872	48981595	48981691	48982978	48983092	131114	60,37	94,92	13,9	0.000372216	0.522,0.606	0.783,0.836	-0.245	NA
ENSG00000068878.14	PSME4	chr2	-	53939955	53940000	53937390	53937540	53948420	53948537	65,73	1,3	59,17	9,5	0.00932103	0.976,0.939	0.805,0.682	0.214	-0.101
ENSG00000069248.11	NUP133	chr1	-	229475637	229475732	229470579	229470804	229484053	229484145	55,86	0,3	58,46	2,13	0.0313448	1.0,0.935	0.935,0.639	0.18	NA
ENSG00000069869.15	NEDD4	chr15	-	55846968	55847034	55841933	55842163	55848371	55848430	43,26	0,0	29,9	2,3	0.0271463	1.0,1.0	0.886,0.616	0.249	-0.225
ENSG00000070081.15	NUCB2	chr11	+	17315385	17315475	17312027	17312120	17330126	17330297	206245	17,35	255216	52,72	0.00913712	0.858,0.778	0.71,0.6	0.163	-0.132
ENSG00000070214.15	SLC44A1	chr9	+	105299742	105299937	105299219	105299309	105309723	105309866	9,9	41,48	21,19	27,34	0.0103025	0.099,0.086	0.28,0.218	-0.157	0.124
ENSG00000070269.13	TMEM260	chr14	+	56603814	56603992	56585760	56585912	56605569	56605683	56,70	5,4	74,97	1,1	0.0375647	0.848,0.897	0.974,0.98	-0.104	0.144
ENSG00000071189.21	SNX13	chr7	-	17830009	17830047	17826021	17826091	17834051	17834184	83,72	4,1	63,49	8,12	0.00505748	0.933,0.98	0.841,0.732	0.17	-0.122
ENSG00000071189.21	SNX13	chr7	-	17845594	17845694	17839806	17840000	17868406	17868490	67,98	0,0	65,51	6,4	0.00125182	1.0,1.0	0.844,0.864	0.146	NA
ENSG00000071205.11	ARHGAP10	chr4	+	148063147	148063300	148046891	148047051	148064415	148064507	34,67	6,2	54,45	0,0	0.00789363	0.739,0.944	1.0,1.0	-0.159	NA
ENSG00000071626.16	DAZAP1	chr19	+	1421150	1421258	1418665	1418731	1428841	1428995	61,57	1,0	91,67	5,7	0.00819385	0.968,1.0	0.901,0.827	0.12	NA
ENSG00000071794.15	HLTF	chr3	-	149064790	149064866	149063430	149063524	149068239	149068335	160169	2,3	56,16	6,11	0.000378722	0.976,0.966	0.824,0.421	0.349	NA
ENSG00000072071.16	ADGRL1	chr19	-	14152132	14152150	14149952	14151615	14152308	14152437	19,21	1,6	16,10	13,11	0.0146619	0.939,0.74	0.501,0.426	0.376	-0.273
ENSG00000072310.16	SREBF1	chr17	-	17823517	17823607	17820089	17820521	17836726	17836987	29,30	81,79	67134	97106	0.00330383	0.152,0.16	0.257,0.387	-0.166	-0.171
ENSG00000072310.16	SREBF1	chr17	-	17817547	17817591	17817255	17817457	17817695	17817916	10,31	95126	82234	214217	0.00151556	0.063,0.135	0.196,0.407	-0.202	NA
ENSG00000072364.12	AFF4	chr5	-	132927120	132927207	132904367	132904404	132932177	132932222	266365	9,13	360260	36,28	0.00118374	0.937,0.934	0.833,0.823	0.108	NA
ENSG00000072518.20	MARK2	chr11	+	63903985	63904147	63903060	63903158	63904785	63905043	126187	26,27	233227	20,16	0.0339363	0.708,0.776	0.853,0.876	-0.123	NA
ENSG00000073008.14	PVR	chr19	+	44657761	44657910	44653899	44654017	44661291	44661323	15,20	0,0	18,19	2,3	0.0269491	1.0,1.0	0.818,0.76	0.211	NA
ENSG00000073060.15	SCARB1	chr12	-	124782682	124782811	124778498	124778586	124786356	124786503	236246	5,3	218201	17,25	2.05497e-05	0.959,0.976	0.865,0.801	0.135	-0.107
ENSG00000073350.13	LLGL2	chr17	+	75538530	75538636	75525788	75525825	75543396	75543501	40,38	39,52	24,6	53,42	0.0114103	0.339,0.268	0.185,0.067	0.177	NA
ENSG00000073417.14	PDE8A	chr15	+	85090717	85090915	85089337	85089416	85091043	85091181	10,20	123105	28,34	39,6	0.000777352	0.039,0.087	0.264,0.739	-0.439	NA
ENSG00000073614.11	KDM5A	chr12	-	286125	286207	285455	285662	292758	292925	20,21	31,45	7,5	47,45	0.00169648	0.244,0.189	0.069,0.053	0.155	NA
ENSG00000073921.17	PICALM	chr11	-	85976622	85976682	85958838	85959060	85981128	85981228	12,26	49,49	36,39	43,29	0.0186592	0.121,0.229	0.319,0.429	-0.199	NA
ENSG00000073921.17	PICALM	chr11	-	85978069	85978093	85976622	85976682	85981128	85981228	149177	12,37	165103	40,47	0.0492074	0.905,0.785	0.759,0.626	0.152	NA
ENSG00000073921.17	PICALM	chr11	-	85976622	85976682	85974707	85974812	85981128	85981228	249272	16,21	331259	45,84	0.00282284	0.897,0.879	0.805,0.633	0.169	NA
ENSG00000074054.17	CLASP1	chr2	-	121445448	121445496	121430072	121430177	121447336	121447507	80119	17,31	81,55	45,37	0.00318871	0.743,0.702	0.525,0.477	0.221	0.283
ENSG00000074054.17	CLASP1	chr2	-	121401867	121401870	121401508	121401672	121404370	121404434	9,12	0,0	2,6	3,3	0.000520025	1.0,1.0	0.394,0.661	0.472	NA
ENSG00000074266.17	EED	chr11	+	86257514	86257596	86256386	86256512	86264171	86264263	130122	0,1	115,51	0,9	0.0184162	1.0,0.984	1.0,0.739	0.123	NA
ENSG00000074319.12	TSG101	chr11	-	18519518	18519603	18516098	18516164	18526774	18526913	185172	3,2	127,74	11,19	1.68622e-05	0.969,0.977	0.852,0.661	0.217	NA
ENSG00000074964.16	ARHGEF10L	chr1	+	17634547	17634562	17632320	17632466	17634834	17635016	33,41	12,10	22,17	27,33	9.56075e-05	0.699,0.776	0.407,0.303	0.383	-0.236
ENSG00000075131.9	TIPIN	chr15	-	66351524	66351600	66349314	66349437	66352128	66352207	45,37	0,0	12,2	2,2	0.0254834	1.0,1.0	0.75,0.333	0.459	NA
ENSG00000075292.18	ZNF638	chr2	+	71408121	71408247	71406127	71406262	71418601	71418639	119145	2,3	60,15	11,18	5.11468e-05	0.967,0.96	0.732,0.294	0.451	NA
ENSG00000075539.13	FRYL	chr4	-	48549472	48549623	48548689	48548793	48550591	48550704	88118	0,4	88,44	6,7	0.0250888	1.0,0.937	0.88,0.759	0.149	NA
ENSG00000075539.13	FRYL	chr4	-	48710518	48710698	48684672	48684795	48780077	48780299	31,39	2,4	28,28	7,13	0.0406849	0.886,0.83	0.667,0.519	0.265	NA
ENSG00000075790.10	BCAP29	chr7	+	107613653	107613732	107613331	107613432	107618327	107618664	21,25	38,61	4,3	37,24	0.00577825	0.216,0.17	0.051,0.059	0.138	NA
ENSG00000076043.9	REXO2	chr11	+	114443855	114443933	114440655	114440739	114449845	114450276	38,33	1,2	31,20	6,14	0.00547859	0.95,0.892	0.721,0.417	0.352	NA
ENSG00000076043.9	REXO2	chr11	+	114447825	114447879	114440655	114440739	114449845	114450276	35,32	1,2	30,14	6,14	0.00675982	0.954,0.904	0.746,0.369	0.372	NA
ENSG00000076108.11	BAZ2A	chr12	-	56630775	56630865	56617394	56617532	56636181	56636318	59,47	41,50	46,48	84101	0.0106508	0.418,0.32	0.215,0.192	0.165	-0.389
ENSG00000076201.14	PTPN23	chr3	+	47404651	47404779	47396142	47396217	47405004	47405081	36,55	9,3	48,36	1,0	0.00472012	0.667,0.902	0.96,1.0	-0.196	NA
ENSG00000076242.14	MLH1	chr3	+	37042267	37042331	37040185	37040294	37047518	37047683	94,98	0,2	63,65	1,13	0.00542328	1.0,0.964	0.972,0.731	0.131	NA
ENSG00000076351.12	SLC46A1	chr17	-	28402237	28402321	28400609	28400766	28404615	28405468	17,24	0,4	10,6	9,2	0.0490703	1.0,0.75	0.357,0.6	0.397	NA
ENSG00000076382.16	SPAG5	chr17	-	28584651	28584745	28584425	28584480	28585101	28585215	143236	5,11	388336	25,54	0.0297265	0.935,0.915	0.886,0.757	0.104	NA
ENSG00000076685.18	NT5C2	chr10	-	103100662	103100943	103099925	103100019	103101044	103101102	23,20	130101	30,31	73,38	0.00279425	0.081,0.09	0.17,0.29	-0.144	NA
ENSG00000076928.17	ARHGEF1	chr19	+	41928853	41928986	41923091	41923233	41929654	41930150	24,23	9,10	15,15	0,1	0.000621634	0.571,0.535	1.0,0.882	-0.388	NA
ENSG00000076928.17	ARHGEF1	chr19	+	41928830	41928986	41923093	41923233	41929654	41930127	26,23	9,10	19,15	0,1	0.000423965	0.591,0.535	1.0,0.882	-0.378	NA
ENSG00000076928.17	ARHGEF1	chr19	+	41892024	41892123	41888751	41888865	41892330	41892373	97111	0,3	70,49	7,3	0.035613	1.0,0.949	0.833,0.891	0.112	NA
ENSG00000076984.17	MAP2K7	chr19	+	7910062	7910129	7909754	7909896	7910259	7910373	42,60	0,2	36,25	1,8	0.0491088	1.0,0.941	0.95,0.624	0.183	NA
ENSG00000077097.13	TOP2B	chr3	-	25618417	25618509	25615430	25615586	25618653	25618849	572594	13,25	347140	42,80	0.000105998	0.957,0.922	0.805,0.467	0.303	NA
ENSG00000077157.21	PPP1R12B	chr1	+	202430730	202430810	202428854	202428929	202431479	202431619	32,44	4,9	24,17	11,21	0.0182751	0.8,0.71	0.522,0.288	0.35	-0.24
ENSG00000077157.21	PPP1R12B	chr1	+	202443086	202443127	202442525	202442572	202445045	202445228	9,11	5,10	4,0	7,13	0.0283411	0.54,0.418	0.271,0.0	0.343	NA
ENSG00000078070.11	MCCC1	chr3	-	183025754	183025804	183022416	183022554	183033990	183034077	248221	6,8	94,40	10,7	0.0111888	0.962,0.944	0.85,0.776	0.14	NA
ENSG00000078269.13	SYNJ2	chr6	+	158059256	158059353	158054966	158055028	158061991	158062164	46,42	0,0	34,9	3,3	0.00474417	1.0,1.0	0.85,0.6	0.275	NA
ENSG00000078269.13	SYNJ2	chr6	+	158078163	158078281	158076625	158076782	158081108	158081327	61,78	0,2	41,11	2,7	0.0134382	1.0,0.951	0.911,0.44	0.3	NA
ENSG00000078487.17	ZCWPW1	chr7	-	100407227	100407303	100406693	100406798	100408538	100408659	12,6	4,6	1,1	0,0	0.000195703	0.6,0.333	1.0,1.0	-0.533	NA
ENSG00000078674.17	PCM1	chr8	+	17924712	17924780	17922839	17923188	17935588	17935706	97121	10,7	85,67	18,24	0.00371426	0.837,0.901	0.714,0.596	0.214	NA
ENSG00000080007.7	DDX43	chr6	+	73412204	73412292	73409247	73409348	73413657	73413785	69,73	0,1	53,24	0,7	0.0315883	1.0,0.973	1.0,0.632	0.17	NA
ENSG00000080345.17	RIF1	chr2	+	151422949	151423042	151420189	151420379	151428783	151428922	104114	0,2	68,38	6,7	0.000389181	1.0,0.966	0.85,0.731	0.193	NA
ENSG00000080345.17	RIF1	chr2	+	151456577	151456620	151454894	151455159	151457760	151457963	71127	0,0	71,44	9,16	7.95255e-08	1.0,1.0	0.835,0.638	0.264	NA
ENSG00000080345.17	RIF1	chr2	+	151468473	151468551	151467999	151468146	151468640	151468756	99102	19,22	94,35	47,34	0.00219955	0.723,0.699	0.5,0.34	0.291	NA
ENSG00000080823.21	MOK	chr14	-	102231706	102231821	102229456	102229657	102232534	102232708	24,21	3,3	4,0	4,2	0.0172008	0.8,0.778	0.333,0.0	0.623	NA
ENSG00000081177.18	EXD2	chr14	+	69203916	69204000	69191528	69191591	69209423	69209803	34,33	0,1	26,12	3,2	0.0431738	1.0,0.943	0.813,0.75	0.19	NA
ENSG00000081665.13	ZNF506	chr19	-	19793833	19795660	19791561	19792484	19806030	19806126	7,10	2,9	2,0	4,3	0.0490267	0.636,0.357	0.2,0.0	0.396	NA
ENSG00000081870.11	HSPB11	chr1	-	53928371	53928440	53923532	53923947	53930038	53930145	354411	4,3	382208	14,40	2.422e-06	0.979,0.986	0.935,0.732	0.149	-0.11
ENSG00000081870.11	HSPB11	chr1	-	53930038	53930145	53923532	53923947	53939984	53940097	113132	2,5	118133	7,17	0.0431738	0.966,0.93	0.894,0.796	0.103	NA
ENSG00000082014.16	SMARCD3	chr7	-	151245459	151245671	151243658	151243701	151275113	151275251	8,11	0,0	17,28	3,2	0.0399631	1.0,1.0	0.739,0.875	0.193	NA
ENSG00000082458.11	DLG3	chrX	+	70497179	70497221	70492520	70492596	70498519	70498570	51,65	1,0	51,30	1,7	0.0187407	0.971,1.0	0.971,0.735	0.133	NA
ENSG00000082898.16	XPO1	chr2	-	61501995	61502040	61499764	61499894	61522610	61522683	193196	19,37	139,74	50125	0.00655153	0.865,0.77	0.637,0.272	0.363	-0.26
ENSG00000082898.16	XPO1	chr2	-	61502248	61502310	61499712	61499894	61522610	61522683	334358	19,37	271156	50125	0.0066942	0.906,0.842	0.749,0.408	0.295	NA
ENSG00000083097.14	DOPEY1	chr6	+	83113322	83113421	83110124	83110314	83118887	83118987	16,20	0,5	7,0	4,6	0.0177952	1.0,0.667	0.467,0.0	0.6	NA
ENSG00000083223.17	ZCCHC6	chr9	-	86341001	86341053	86340035	86340105	86343074	86343163	65121	1,1	117,84	4,18	0.0012076	0.975,0.986	0.946,0.735	0.14	NA
ENSG00000083223.17	ZCCHC6	chr9	-	86318957	86319058	86317218	86317276	86319583	86319644	70,64	2,0	42,28	5,6	0.00265474	0.946,1.0	0.808,0.7	0.219	NA
ENSG00000083642.18	PDS5B	chr13	+	32770653	32770761	32770120	32770560	32773188	32773324	87111	2,3	107,55	15,19	0.00011719	0.956,0.949	0.781,0.591	0.266	NA
ENSG00000083750.12	RRAGB	chrX	+	55727306	55727390	55722185	55722285	55729293	55729360	12,14	21,28	2,0	6,9	0.041466	0.222,0.2	0.143,0.0	0.14	NA
ENSG00000083937.8	CHMP2B	chr3	+	87240322	87240453	87227308	87227556	87240698	87240790	48,60	176178	58,88	90,33	0.01236	0.12,0.144	0.244,0.571	-0.275	NA
ENSG00000084444.13	FAM234B	chr12	+	13076025	13076143	13071240	13071396	13079788	13080009	62,42	2,0	119,89	8,15	0.0102105	0.939,1.0	0.881,0.748	0.155	NA
ENSG00000084693.15	AGBL5	chr2	+	27069572	27069706	27068631	27068744	27070091	27070620	61,72	3,5	45,27	0,0	0.0277912	0.91,0.878	1.0,1.0	-0.106	NA
ENSG00000085382.11	HACE1	chr6	-	104833041	104833173	104796928	104797025	104843222	104843298	17,7	3,1	12,3	0,0	0.0475443	0.739,0.778	1.0,1.0	-0.242	NA
ENSG00000085552.16	IGSF9	chr1	-	159942962	159943151	159937685	159937838	159943396	159943628	86,98	8,8	64,40	0,0	0.000778279	0.843,0.86	1.0,1.0	-0.149	NA
ENSG00000085721.12	RRN3	chr16	-	15083512	15083582	15079997	15080096	15084641	15084705	94134	1,1	116,69	4,12	0.00167884	0.98,0.986	0.938,0.75	0.139	NA
ENSG00000085982.13	USP40	chr2	-	233525477	233525562	233524491	233524562	233527406	233527578	83,76	2,3	34,8	3,7	0.0492926	0.954,0.927	0.85,0.364	0.334	-0.316
ENSG00000086300.15	SNX10	chr7	+	26354056	26354184	26346419	26346466	26357006	26357127	2,5	5,5	0,1	12,4	0.0212016	0.167,0.333	0.0,0.111	0.195	NA
ENSG00000087157.18	PGS1	chr17	+	78396307	78396385	78392513	78392665	78398251	78398351	27,28	2,4	28,27	0,0	0.0158463	0.871,0.778	1.0,1.0	-0.175	NA
ENSG00000087586.17	AURKA	chr20	-	56388686	56388784	56388155	56388202	56390555	56390665	210324	27,18	532352	14,1	2.28266e-05	0.795,0.9	0.95,0.994	-0.124	NA
ENSG00000088340.15	FER1L4	chr20	-	35578835	35578967	35576785	35576828	35579055	35579114	230265	53,60	208237	26,15	0.00196303	0.685,0.688	0.8,0.888	-0.158	-0.195
ENSG00000088367.20	EPB41L1	chr20	+	36125422	36125527	36112425	36112480	36173763	36173954	11,10	11,16	1,0	7,2	0.00780722	0.333,0.238	0.067,0.0	0.252	NA
ENSG00000088367.20	EPB41L1	chr20	+	36214359	36214440	36212271	36212376	36221863	36221944	12,22	3,5	6,1	6,4	0.0382819	0.667,0.688	0.333,0.111	0.456	NA
ENSG00000088367.20	EPB41L1	chr20	+	36214356	36214440	36212271	36212376	36221863	36221934	14,16	3,5	2,1	6,4	0.0020669	0.7,0.615	0.143,0.111	0.53	NA
ENSG00000088448.14	ANKRD10	chr13	-	110900529	110900661	110892956	110893263	110906032	110906124	42,31	37,47	12,13	39,32	0.0490428	0.362,0.248	0.133,0.169	0.154	-0.3
ENSG00000088448.14	ANKRD10	chr13	-	110900529	110900694	110893196	110893263	110906032	110906124	34,44	37,47	13,12	39,32	0.015658	0.315,0.319	0.143,0.158	0.167	NA
ENSG00000089022.13	MAPKAPK5	chr12	+	111868752	111868861	111867571	111867669	111871084	111871180	48,64	4,6	46,54	1,0	0.0115214	0.857,0.842	0.958,1.0	-0.13	NA
ENSG00000089048.14	ESF1	chr20	-	13718907	13718984	13717367	13717514	13728377	13728465	108125	0,0	91,62	2,14	0.000178513	1.0,1.0	0.958,0.689	0.177	NA
ENSG00000089091.16	DZANK1	chr20	-	18451853	18451962	18448983	18449069	18452614	18452682	3,3	6,10	0,0	1,6	0.0492596	0.2,0.13	0.0,0.0	0.165	NA
ENSG00000089123.15	TASP1	chr20	-	13559007	13559114	13534021	13534141	13580896	13580981	57,65	0,2	32,28	7,2	0.012691	1.0,0.942	0.696,0.875	0.185	NA
ENSG00000089123.15	TASP1	chr20	-	13569506	13569586	13534021	13534141	13580896	13580981	24,23	0,2	20,11	7,2	0.0244851	1.0,0.852	0.588,0.733	0.265	NA
ENSG00000090006.17	LTBP4	chr19	+	40622949	40623021	40622400	40622667	40623603	40623732	180215	41,68	115120	87,63	0.00132685	0.693,0.619	0.404,0.495	0.206	-0.365
ENSG00000090060.17	PAPOLA	chr14	+	96560648	96560711	96556174	96556413	96564954	96565048	79,61	79,76	26,10	57,32	0.0183325	0.354,0.305	0.2,0.146	0.157	-0.158
ENSG00000090316.15	MAEA	chr4	+	1322380	1322503	1315396	1315600	1332756	1332865	73,72	1,1	67,28	1,8	0.0462344	0.973,0.973	0.971,0.636	0.169	NA
ENSG00000090487.10	SPG21	chr15	-	64983506	64983593	64980863	64981025	64989664	64989911	491481	23,28	419407	52,71	1.52864e-05	0.914,0.896	0.801,0.741	0.134	NA
ENSG00000090989.17	EXOC1	chr4	+	55888887	55888932	55882726	55883928	55890222	55890386	91110	59,58	30,4	62,84	3.99133e-08	0.493,0.544	0.234,0.029	0.387	-0.238
ENSG00000091009.7	RBM27	chr5	+	146251710	146251875	146237297	146237432	146254942	146255092	60,94	9,11	105137	1,3	0.000419472	0.769,0.81	0.981,0.958	-0.18	NA
ENSG00000091129.19	NRCAM	chr7	-	108177989	108178112	108160360	108160492	108180222	108180427	115121	10,11	79,37	37,25	1.22159e-07	0.852,0.846	0.516,0.425	0.378	-0.191
ENSG00000091129.19	NRCAM	chr7	-	108168276	108168402	108160360	108160492	108180222	108180427	17,10	10,11	12,8	37,25	0.0246189	0.459,0.313	0.14,0.138	0.247	NA
ENSG00000091536.16	MYO15A	chr17	+	18169481	18169621	18167589	18167723	18171637	18171771	3,7	8,6	0,0	2,2	0.00527684	0.158,0.368	0.0,0.0	0.263	NA
ENSG00000092096.14	SLC22A17	chr14	-	23347890	23347996	23347459	23347731	23348160	23348306	22,27	6,3	33,34	1,1	0.0433504	0.647,0.818	0.943,0.944	-0.211	0.313
ENSG00000092140.14	G2E3	chr14	+	30581075	30581116	30559159	30559272	30586717	30586815	76118	4,6	90,36	11,13	0.027478	0.925,0.928	0.842,0.644	0.184	NA
ENSG00000092208.16	GEMIN2	chr14	+	39124991	39125036	39122429	39122543	39128279	39128348	61,55	9,8	42,38	17,32	0.00435059	0.81,0.812	0.609,0.428	0.293	0.12
ENSG00000092439.13	TRPM7	chr15	-	50583088	50583156	50575868	50575919	50586391	50586582	43,60	0,0	35,23	0,6	0.0269123	1.0,1.0	1.0,0.669	0.165	NA
ENSG00000094975.13	SUCO	chr1	+	172577538	172577559	172575517	172575623	172577763	172577819	86132	28,16	154,58	7,4	0.00570059	0.708,0.867	0.946,0.92	-0.146	0.195
ENSG00000095066.11	HOOK2	chr19	-	12765828	12765834	12765689	12765724	12765926	12766014	7,21	80,89	28,30	48,23	0.000358729	0.076,0.181	0.354,0.55	-0.324	NA
ENSG00000095787.21	WAC	chr10	+	28595732	28596041	28590719	28590832	28608185	28608433	375507	65,82	405331	45,21	0.0160924	0.743,0.756	0.818,0.887	-0.103	0.264
ENSG00000095906.16	NUBP2	chr16	+	1786756	1786955	1786536	1786655	1787676	1787777	82,74	16,25	100,81	7,9	0.0225437	0.719,0.597	0.877,0.818	-0.19	NA
ENSG00000095951.16	HIVEP1	chr6	+	12020247	12020418	12015525	12015668	12089183	12089237	5,2	5,14	0,0	8,5	0.0170152	0.333,0.067	0.0,0.0	0.2	NA
ENSG00000099783.11	HNRNPM	chr19	+	8462528	8462581	8455404	8455574	8463496	8463504	493422	9,7	207,73	8,23	0.00109154	0.97,0.973	0.939,0.652	0.176	-0.1
ENSG00000099812.8	MISP	chr19	+	761624	761663	759908	760039	763500	764318	109124	11,19	82,57	28,37	0.000932647	0.868,0.812	0.66,0.506	0.257	NA
ENSG00000099917.17	MED15	chr22	+	20551435	20551487	20537116	20537204	20554935	20555148	67,93	0,0	87,71	5,13	6.64043e-05	1.0,1.0	0.912,0.765	0.161	NA
ENSG00000099917.17	MED15	chr22	+	20553144	20553174	20537116	20537204	20554935	20555148	27,27	0,0	39,16	5,13	0.000168281	1.0,1.0	0.849,0.47	0.341	NA
ENSG00000100099.20	HPS4	chr22	-	26466050	26466104	26465454	26465551	26466225	26466262	6,14	34,43	9,12	11,12	0.0400041	0.094,0.16	0.324,0.369	-0.22	NA
ENSG00000100138.13	SNU13	chr22	-	41688078	41688327	41680243	41680364	41688793	41688804	1,1	22,15	7,11	26,16	0.00485848	0.022,0.032	0.119,0.256	-0.161	NA
ENSG00000100138.13	SNU13	chr22	-	41687721	41688327	41680245	41680364	41688793	41688804	1,1	22,15	7,10	26,16	0.00645237	0.022,0.032	0.119,0.238	-0.151	NA
ENSG00000100150.16	DEPDC5	chr22	+	31876156	31876265	31873973	31874405	31879524	31879696	16,9	4,6	11,2	1,0	0.0196338	0.667,0.429	0.846,1.0	-0.375	NA
ENSG00000100227.17	POLDIP3	chr22	-	42601969	42602056	42599697	42599793	42602769	42603012	98138	16,13	110,45	47,50	0.0001506	0.754,0.841	0.539,0.31	0.373	NA
ENSG00000100227.17	POLDIP3	chr22	-	42601969	42602107	42599697	42599793	42602769	42603160	55,70	16,13	64,22	47,50	0.00038339	0.632,0.729	0.405,0.18	0.388	NA
ENSG00000100266.18	PACSIN2	chr22	-	42876887	42877010	42876136	42876333	42879047	42879169	202241	30,67	163108	86125	0.000489849	0.771,0.643	0.487,0.302	0.313	-0.257
ENSG00000100271.16	TTLL1	chr22	-	43070170	43070242	43069603	43069844	43075473	43075590	4,9	4,7	0,2	8,7	0.00819748	0.339,0.398	0.0,0.128	0.305	NA
ENSG00000100281.13	HMGXB4	chr22	+	35263981	35264096	35263795	35263874	35264647	35265603	38,57	21,12	56,70	5,4	0.00901146	0.475,0.704	0.848,0.897	-0.283	0.352
ENSG00000100330.15	MTMR3	chr22	+	30022028	30022139	30019479	30020884	30022608	30022697	77,99	9,7	74,68	15,35	0.0156113	0.811,0.876	0.712,0.493	0.241	NA
ENSG00000100372.14	SLC25A17	chr22	-	40799022	40799083	40779008	40779125	40819194	40819332	26,23	0,1	38,16	3,7	0.00943406	1.0,0.927	0.876,0.559	0.246	NA
ENSG00000100372.14	SLC25A17	chr22	-	40792524	40792676	40779008	40779125	40819194	40819350	21,15	0,1	14,8	3,7	0.00176805	1.0,0.882	0.7,0.364	0.409	NA
ENSG00000100429.17	HDAC10	chr22	-	50250426	50250523	50249858	50249964	50250770	50251228	4,14	8,2	16,13	1,0	0.00577825	0.2,0.778	0.889,1.0	-0.456	NA
ENSG00000100429.17	HDAC10	chr22	-	50248830	50248859	50248661	50248751	50249327	50249454	12,11	5,3	7,9	0,0	0.00150346	0.636,0.728	1.0,1.0	-0.318	NA
ENSG00000100429.17	HDAC10	chr22	-	50248830	50248890	50248661	50248751	50249327	50249454	18,25	5,3	16,27	0,0	0.00174461	0.668,0.823	1.0,1.0	-0.254	NA
ENSG00000100429.17	HDAC10	chr22	-	50250062	50250160	50249867	50249964	50250770	50251385	46,55	8,2	31,35	1,0	0.0226068	0.742,0.932	0.939,1.0	-0.133	NA
ENSG00000100461.17	RBM23	chr14	-	22908332	22908380	22906027	22906368	22909482	22909595	32,26	49,48	8,4	34,36	0.00502462	0.286,0.25	0.126,0.064	0.173	NA
ENSG00000100523.14	DDHD1	chr14	-	53051843	53051927	53043967	53046949	53054437	53054629	18,15	34,42	1,0	25,13	0.000117968	0.209,0.152	0.02,0.0	0.17	-0.276
ENSG00000100592.15	DAAM1	chr14	+	59360801	59360862	59359396	59359504	59363650	59363782	435530	1,3	478283	13,40	1.10701e-08	0.996,0.99	0.953,0.797	0.118	NA
ENSG00000100614.17	PPM1A	chr14	+	60289805	60289914	60285623	60285741	60291396	60291454	339410	1,5	367291	12,33	2.86881e-06	0.994,0.976	0.939,0.815	0.108	NA
ENSG00000100731.15	PCNX	chr14	+	70988566	70988699	70976941	70978648	70995740	70995843	19,31	0,1	21,7	1,7	0.0141244	1.0,0.939	0.913,0.333	0.347	-0.318
ENSG00000100731.15	PCNX	chr14	+	70995740	70995843	70976941	70978648	71009633	71009724	0,1	9,19	1,7	5,7	0.00795164	0.0,0.026	0.091,0.333	-0.199	0.306
ENSG00000100813.14	ACIN1	chr14	-	23093478	23093544	23090521	23090633	23094974	23095614	180197	0,3	195171	4,23	0.000372216	1.0,0.972	0.963,0.799	0.105	NA
ENSG00000100815.12	TRIP11	chr14	-	92010985	92011072	92007639	92007852	92014214	92014577	28,37	2,3	14,7	4,6	0.0467212	0.875,0.86	0.636,0.368	0.365	NA
ENSG00000100815.12	TRIP11	chr14	-	92011754	92011795	92007639	92007852	92014214	92014577	26,23	2,3	9,2	4,6	0.0264168	0.894,0.833	0.595,0.179	0.476	NA
ENSG00000101040.19	ZMYND8	chr20	-	47212641	47212725	47209213	47210897	47220257	47220324	369331	89126	69,14	147,90	0	0.675,0.568	0.19,0.072	0.49	NA
ENSG00000101104.12	PABPC1L	chr20	+	44938673	44938748	44938044	44938191	44939125	44939317	70,71	6,4	63,50	0,1	0.0190165	0.854,0.899	1.0,0.962	-0.104	NA
ENSG00000101150.17	TPD52L2	chr20	+	63875815	63875875	63873667	63873816	63882718	63882820	655848	143187	484218	336381	1.17646e-07	0.719,0.717	0.446,0.243	0.373	-0.204
ENSG00000101150.17	TPD52L2	chr20	+	63875815	63875875	63873667	63873816	63889189	63889238	303357	2,6	210107	10,33	2.73168e-05	0.988,0.971	0.922,0.645	0.196	NA
ENSG00000101166.15	PRELID3B	chr20	-	59037190	59037280	59036689	59036760	59038465	59038634	9441228	34,58	1017672	63141	0.00298434	0.933,0.914	0.89,0.704	0.127	NA
ENSG00000101187.15	SLCO4A1	chr20	+	62668011	62668184	62667744	62667910	62668476	62668541	152226	24,28	432348	21,8	3.83781e-05	0.76,0.801	0.911,0.956	-0.153	0.221
ENSG00000101187.15	SLCO4A1	chr20	+	62668157	62668184	62667869	62667910	62668476	62668541	28,49	24,28	74,54	21,8	0.0103402	0.464,0.565	0.724,0.834	-0.264	0.368
ENSG00000101187.15	SLCO4A1	chr20	+	62668154	62668184	62667740	62667910	62668476	62668541	28,50	24,28	76,58	21,8	0.00858547	0.457,0.563	0.723,0.839	-0.271	0.388
ENSG00000101236.16	RNF24	chr20	-	3974331	3974400	3963874	3964024	4015436	4015545	19,19	24,29	8,2	25,19	0.042311	0.293,0.256	0.144,0.052	0.176	NA
ENSG00000101333.16	PLCB4	chr20	+	9476716	9476753	9473278	9473365	9478920	9481242	17,11	1,1	2,7	5,6	0.00118181	0.92,0.881	0.213,0.441	0.574	-0.466
ENSG00000101928.12	MOSPD1	chrX	-	134891478	134891640	134888953	134889192	134896816	134897034	54,54	24,17	51,63	9,6	0.0349563	0.529,0.614	0.739,0.84	-0.218	NA
ENSG00000102349.15	KLF8	chrX	+	56270181	56270321	56265179	56269489	56284312	56287884	18,25	1,0	9,1	4,1	0.00495546	0.9,1.0	0.529,0.333	0.519	NA
ENSG00000102606.17	ARHGEF7	chr13	+	111280271	111280350	111277586	111277673	111280537	111280677	112110	1,2	147,91	7,18	0.0015348	0.982,0.965	0.913,0.717	0.159	NA
ENSG00000102710.19	SUPT20H	chr13	-	37048563	37048599	37047877	37047936	37051487	37051583	61,50	47,55	27,10	54,41	0.00582637	0.469,0.383	0.254,0.143	0.227	NA
ENSG00000102786.14	INTS6	chr13	-	51382028	51382123	51379461	51379572	51383328	51383461	94107	2,2	80,39	4,10	0.021295	0.959,0.964	0.909,0.661	0.176	NA
ENSG00000102890.14	ELMO3	chr16	+	67199950	67200001	67199683	67199756	67200191	67200361	54,57	6,6	37,27	0,1	0.0127552	0.844,0.851	1.0,0.942	-0.124	NA
ENSG00000102898.11	NUTF2	chr16	+	67847277	67847456	67846934	67846985	67865101	67865229	49,57	12,10	24,25	20,15	0.00711034	0.671,0.74	0.375,0.455	0.29	NA
ENSG00000102908.20	NFAT5	chr16	+	69646516	69646578	69626402	69626528	69647027	69647167	15,19	9,17	9,6	23,23	0.0114734	0.479,0.381	0.177,0.126	0.278	-0.361
ENSG00000102921.7	N4BP1	chr16	-	48551385	48551482	48548006	48548114	48553538	48553669	80108	0,3	103,69	8,10	0.00400173	1.0,0.947	0.866,0.775	0.153	NA
ENSG00000102984.14	ZNF821	chr16	-	71867892	71868037	71864902	71865048	71879906	71880023	57,67	6,11	24,26	8,15	0.0390889	0.826,0.753	0.6,0.464	0.257	-0.318
ENSG00000103121.8	CMC2	chr16	-	80981805	80981877	80980769	80980879	80997313	80997429	148180	6,9	254175	33,61	0.000438643	0.927,0.911	0.798,0.596	0.222	-0.136
ENSG00000103121.8	CMC2	chr16	-	80980769	80980879	80975935	80976179	80997313	80997429	162243	14,25	361537	64104	0.0228791	0.853,0.829	0.738,0.721	0.111	-0.13
ENSG00000103121.8	CMC2	chr16	-	80981805	80981877	80975800	80976179	80997313	80997429	266293	14,25	333207	64104	0.000157312	0.907,0.858	0.728,0.506	0.266	-0.115
ENSG00000103121.8	CMC2	chr16	-	80980769	80980879	80975935	80976179	80981805	80981877	199282	163167	418546	169107	0.00395755	0.379,0.458	0.553,0.718	-0.217	NA
ENSG00000103121.8	CMC2	chr16	-	80997313	80997429	80976059	80976179	81006733	81006854	136187	14,15	244316	37,64	0.0464471	0.829,0.862	0.767,0.712	0.106	NA
ENSG00000103121.8	CMC2	chr16	-	80997313	80997429	80980769	80980879	81006733	81006854	128171	1,1	213273	10,40	5.20159e-06	0.985,0.988	0.914,0.773	0.143	NA
ENSG00000103121.8	CMC2	chr16	-	80981805	80981877	80975800	80976179	81006733	81006873	165164	14,15	172106	37,64	0.00274287	0.858,0.849	0.705,0.46	0.271	NA
ENSG00000103121.8	CMC2	chr16	-	80981805	80981877	80980769	80980879	81006733	81006873	47,51	1,1	93,74	10,40	0.000828807	0.96,0.963	0.827,0.487	0.304	NA
ENSG00000103145.10	HCFC1R1	chr16	-	3023473	3023530	3023232	3023361	3023846	3024246	170228	109121	158155	187210	3.45684e-05	0.472,0.519	0.326,0.297	0.184	-0.266
ENSG00000103148.15	NPRL3	chr16	-	130521	130591	112621	112775	138149	138512	41,55	1,1	44,26	4,8	0.00948274	0.955,0.966	0.851,0.629	0.22	NA
ENSG00000103148.15	NPRL3	chr16	-	119125	119255	112621	112775	138149	138345	22,29	1,1	23,17	4,8	0.0168353	0.917,0.935	0.742,0.515	0.297	NA
ENSG00000103168.16	TAF1C	chr16	-	84184850	84185060	84183409	84183507	84186900	84187045	13,25	4,6	19,11	0,0	0.000466257	0.619,0.676	1.0,1.0	-0.353	NA
ENSG00000103168.16	TAF1C	chr16	-	84183696	84183778	84183409	84183507	84186900	84187020	78,67	4,6	34,24	0,0	0.0114103	0.907,0.848	1.0,1.0	-0.123	NA
ENSG00000103194.15	USP10	chr16	+	84775159	84775225	84768264	84768358	84778894	84779194	88,98	2,0	80,40	3,16	0.00171593	0.959,1.0	0.935,0.573	0.226	NA
ENSG00000103194.15	USP10	chr16	+	84775159	84775225	84772540	84772685	84778894	84779194	255264	6,5	225,97	23,61	0.000106365	0.958,0.966	0.84,0.46	0.312	NA
ENSG00000103245.13	NARFL	chr16	-	740021	740103	739642	739738	740919	740997	0,0	4,6	3,3	8,0	0.0220728	0.0,0.0	0.158,1.0	-0.579	NA
ENSG00000103507.13	BCKDK	chr16	+	31110687	31110761	31110400	31110499	31111090	31111219	409534	5,6	255180	19,42	4.15357e-09	0.976,0.978	0.872,0.685	0.199	NA
ENSG00000103540.16	CCP110	chr16	+	19547954	19548014	19546411	19546474	19551195	19553400	45,31	0,0	33,11	4,3	0.00204275	1.0,1.0	0.822,0.672	0.253	-0.175
ENSG00000103671.9	TRIP4	chr15	+	64414084	64414211	64409612	64409828	64418540	64418728	159152	5,4	115,67	9,15	0.00738232	0.941,0.95	0.865,0.691	0.167	NA
ENSG00000104047.14	DTWD1	chr15	+	49623670	49623798	49621068	49621122	49625112	49625431	6,3	5,9	1,0	8,6	0.0148355	0.375,0.143	0.059,0.0	0.23	NA
ENSG00000104067.16	TJP1	chr15	-	29727936	29728019	29726780	29726991	29732432	29732528	64,65	0,0	80,15	2,5	0.00916635	1.0,1.0	0.952,0.6	0.224	NA
ENSG00000104067.16	TJP1	chr15	-	29762334	29762438	29761138	29761286	29766265	29766542	10,9	0,0	17,8	3,3	0.00208709	1.0,1.0	0.739,0.571	0.345	NA
ENSG00000104093.13	DMXL2	chr15	-	51455150	51455228	51450128	51450346	51456065	51456193	91,66	1,2	65,29	3,8	0.0348783	0.978,0.943	0.915,0.644	0.181	NA
ENSG00000104164.10	BLOC1S6	chr15	+	45603099	45603187	45592134	45592276	45605427	45605514	94104	1,3	109,51	9,16	0.00150226	0.979,0.945	0.858,0.614	0.226	NA
ENSG00000104164.10	BLOC1S6	chr15	+	45603103	45603187	45592123	45592276	45605427	45605514	64,65	1,3	54,22	9,16	0.0012216	0.97,0.915	0.75,0.407	0.364	NA
ENSG00000104218.14	CSPP1	chr8	+	67074805	67074923	67074242	67074351	67076481	67076581	9,13	9,8	9,3	0,0	9.32983e-05	0.333,0.448	1.0,1.0	-0.609	NA
ENSG00000104231.10	ZFAND1	chr8	-	81717248	81717288	81714986	81715114	81718181	81718224	92,72	63,83	26,18	54,59	0.00221283	0.49,0.363	0.241,0.167	0.222	NA
ENSG00000104365.13	IKBKB	chr8	+	42288633	42288728	42272082	42272205	42290155	42290273	44,33	1,5	32,20	0,0	0.027376	0.957,0.767	1.0,1.0	-0.138	NA
ENSG00000104447.11	TRPS1	chr8	-	115623600	115623758	115619912	115620060	115668544	115669001	47,35	28,39	11,9	24,35	0.0054337	0.456,0.31	0.186,0.114	0.233	NA
ENSG00000104529.17	EEF1D	chr8	-	143588990	143590092	143586728	143586852	143597347	143597675	192245	200208	109,65	144144	0.0160403	0.324,0.371	0.275,0.184	0.118	NA
ENSG00000104626.14	ERI1	chr8	+	9016321	9016405	9011541	9011752	9020349	9020464	24,17	0,0	25,29	0,6	0.0223192	1.0,1.0	1.0,0.707	0.147	NA
ENSG00000104731.13	KLHDC4	chr16	-	87765065	87765340	87761957	87762040	87765791	87765961	2,4	28,47	9,9	29,15	0.0129243	0.034,0.041	0.134,0.231	-0.145	0.138
ENSG00000104863.11	LIN7B	chr19	+	49115259	49115331	49114848	49114967	49116262	49116472	28,35	4,3	46,33	0,0	0.00736819	0.782,0.857	1.0,1.0	-0.18	NA
ENSG00000104885.17	DOT1L	chr19	+	2208934	2208976	2194514	2194577	2210399	2210510	13,20	0,0	11,13	3,10	5.33386e-05	1.0,1.0	0.703,0.457	0.42	NA
ENSG00000104953.18	TLE6	chr19	+	2987355	2987372	2986982	2987238	2987723	2987790	26,26	6,4	31,9	0,1	0.0148055	0.781,0.843	1.0,0.881	-0.128	NA
ENSG00000105053.10	VRK3	chr19	-	49995190	49995275	49994813	49994919	50000789	50000854	46,52	1,0	47,38	4,8	0.00156728	0.958,1.0	0.855,0.704	0.2	NA
ENSG00000105483.16	CARD8	chr19	-	48238382	48238532	48234402	48234543	48240961	48241063	52,54	6,10	44,40	2,0	0.00865361	0.813,0.73	0.917,1.0	-0.187	NA
ENSG00000105618.13	PRPF31	chr19	+	54128304	54128377	54128090	54128200	54129056	54129185	210201	5,0	82,47	5,6	0.00973509	0.955,1.0	0.893,0.8	0.131	NA
ENSG00000105662.15	CRTC1	chr19	+	18774899	18774986	18768484	18768793	18775640	18775821	11,17	0,0	12,14	4,3	0.00097161	1.0,1.0	0.6,0.7	0.35	NA
ENSG00000105662.15	CRTC1	chr19	+	18771441	18771546	18768484	18768793	18775640	18775821	25,32	0,0	12,6	4,3	9.23514e-05	1.0,1.0	0.6,0.5	0.45	NA
ENSG00000105699.16	LSR	chr19	+	35261924	35261981	35258944	35259064	35262545	35262723	101104	70,94	50,38	91,67	0.00173642	0.452,0.388	0.239,0.245	0.178	-0.194
ENSG00000105793.15	GTPBP10	chr7	+	90354457	90354549	90352815	90353009	90372154	90372228	30,32	0,3	17,3	4,9	0.0089563	1.0,0.842	0.68,0.143	0.51	NA
ENSG00000105793.15	GTPBP10	chr7	+	90355085	90355230	90352815	90353009	90372154	90372228	11,12	0,3	6,0	4,9	0.00675982	1.0,0.667	0.429,0.0	0.619	NA
ENSG00000105865.10	DUS4L	chr7	+	107573703	107573883	107571144	107571266	107575187	107575310	98119	9,9	51,62	1,0	0.00325617	0.845,0.869	0.962,1.0	-0.124	-0.235
ENSG00000106080.10	FKBP14	chr7	-	30020212	30020304	30018995	30019123	30022664	30022816	12,5	11,11	0,2	16,20	0.000597214	0.353,0.185	0.0,0.048	0.245	NA
ENSG00000106086.18	PLEKHA8	chr7	+	30050433	30050474	30049223	30049382	30052708	30052866	56,51	3,7	32,14	19,34	4.12885e-05	0.924,0.826	0.523,0.212	0.508	-0.342
ENSG00000106351.12	AGFG2	chr7	+	100556593	100556626	100555666	100555735	100562258	100562379	5,2	13,14	0,0	17,7	0.0106955	0.212,0.091	0.0,0.0	0.151	-0.11
ENSG00000106692.13	FKTN	chr9	+	105615277	105615407	105607818	105607951	105619933	105620061	31,43	4,3	32,12	0,0	0.012867	0.795,0.878	1.0,1.0	-0.163	NA
ENSG00000106976.19	DNM1	chr9	+	128239984	128239996	128239727	128239779	128242231	128242345	10,5	34,43	7,15	13,12	0.0318543	0.204,0.092	0.32,0.522	-0.273	NA
ENSG00000107036.11	RIC1	chr9	+	5753535	5753646	5747301	5747505	5754840	5754930	48,54	0,1	41,21	3,6	0.00343639	1.0,0.964	0.872,0.636	0.228	NA
ENSG00000107372.12	ZFAND5	chr9	-	72363469	72363606	72360627	72360787	72364695	72365197	184162	35,52	107,66	67,78	0.00031065	0.724,0.609	0.444,0.297	0.296	NA
ENSG00000107521.18	HPS1	chr10	-	98431130	98431291	98430570	98430670	98433939	98434091	43,43	5,3	30,12	0,0	0.0105086	0.811,0.878	1.0,1.0	-0.155	0.119
ENSG00000107758.15	PPP3CB	chr10	-	73439871	73439901	73438197	73438420	73444724	73444822	102,88	13,20	30,20	19,32	0.000251762	0.85,0.76	0.532,0.311	0.383	-0.483
ENSG00000107779.11	BMPR1A	chr10	+	86838864	86838979	86756649	86756919	86875866	86876085	38,41	1,1	26,9	3,7	0.0115133	0.95,0.953	0.813,0.391	0.35	NA
ENSG00000107897.18	ACBD5	chr10	-	27223206	27223239	27219722	27219857	27223337	27223452	45,50	68112	31,7	139119	2.25793e-05	0.317,0.238	0.135,0.04	0.19	-0.211
ENSG00000107902.13	LHPP	chr10	+	124517179	124517271	124498035	124498128	124613263	124614141	183223	4,6	179161	12,31	0.000690016	0.958,0.949	0.882,0.722	0.151	NA
ENSG00000107938.17	EDRF1	chr10	+	125731864	125731925	125730287	125730399	125733403	125733551	3,8	17,7	1,0	27,22	0.00199862	0.089,0.388	0.02,0.0	0.228	NA
ENSG00000107959.15	PITRM1	chr10	-	3148170	3148291	3147571	3147737	3149620	3149753	94121	5,8	97,75	21,26	0.000293088	0.904,0.883	0.698,0.591	0.249	NA
ENSG00000108100.17	CCNY	chr10	+	35516522	35516623	35337051	35337207	35529972	35530036	9,17	0,1	15,8	4,3	0.012571	1.0,0.895	0.652,0.571	0.336	NA
ENSG00000108239.8	TBC1D12	chr10	+	94497054	94497172	94493364	94493447	94531201	94531460	36,37	0,1	45,31	2,9	0.00803565	1.0,0.949	0.918,0.633	0.199	NA
ENSG00000108262.15	GIT1	chr17	-	29575811	29575898	29575629	29575703	29576077	29576131	111176	0,1	134,73	4,7	0.00474944	1.0,0.989	0.944,0.839	0.103	NA
ENSG00000108262.15	GIT1	chr17	-	29575811	29575898	29575287	29575470	29576077	29576131	64,75	0,0	74,27	2,4	0.0468013	1.0,1.0	0.949,0.771	0.14	NA
ENSG00000108262.15	GIT1	chr17	-	29575811	29575829	29575629	29575703	29576077	29576131	10,26	0,1	14,18	4,7	0.00175537	1.0,0.955	0.74,0.677	0.269	NA
ENSG00000108384.14	RAD51C	chr17	+	58724039	58724100	58720745	58720812	58732483	58732544	463535	20,25	271139	23,32	0.00321898	0.928,0.922	0.867,0.707	0.138	NA
ENSG00000108469.14	RECQL5	chr17	-	75650516	75650718	75631491	75631668	75651185	75651265	6,3	73,76	11,13	48,32	0.00244691	0.039,0.019	0.103,0.169	-0.107	NA
ENSG00000108523.15	RNF167	chr17	+	4940486	4940726	4940007	4940230	4940872	4940993	7,15	0,0	10,13	2,2	0.0388583	1.0,1.0	0.714,0.765	0.26	NA
ENSG00000108590.10	MED31	chr17	-	6649981	6650078	6643314	6644659	6650355	6650433	64,54	3,6	39,27	24,41	2.16231e-07	0.914,0.818	0.448,0.248	0.518	NA
ENSG00000108599.14	AKAP10	chr17	-	19909180	19909276	19906167	19906232	19920035	19920118	70,77	0,1	100,89	3,11	0.00488271	1.0,0.975	0.943,0.802	0.115	NA
ENSG00000108651.9	UTP6	chr17	-	31889284	31889403	31887235	31887313	31892259	31892323	67,75	0,0	53,40	4,4	0.00449283	1.0,1.0	0.869,0.833	0.149	NA
ENSG00000108799.12	EZH1	chr17	-	42724304	42724424	42722794	42722915	42727634	42727763	120144	18,16	107106	24,67	0.0377786	0.769,0.818	0.69,0.442	0.228	-0.194
ENSG00000109171.14	SLAIN2	chr4	+	48394575	48394653	48383677	48383784	48420124	48420489	52,36	57,52	28,14	71,96	0.000372216	0.313,0.257	0.165,0.068	0.169	NA
ENSG00000109184.14	DCUN1D4	chr4	+	51905188	51905320	51899336	51899378	51911069	51911174	3,1	37,21	8,20	21,15	0.000432076	0.039,0.023	0.16,0.4	-0.249	NA
ENSG00000109445.10	ZNF330	chr4	+	141222365	141222491	141220927	141221108	141226766	141226846	100120	0,1	93,68	1,20	0.00144884	1.0,0.984	0.979,0.63	0.188	NA
ENSG00000109881.16	CCDC34	chr11	-	27350331	27350439	27341391	27341550	27357402	27357541	63,55	5,7	59,36	15,15	0.0375435	0.863,0.797	0.663,0.545	0.226	NA
ENSG00000110066.14	SUV420H1	chr11	-	68180131	68180200	68175046	68175183	68185780	68185928	443489	19,30	262109	36,60	0.0013056	0.924,0.895	0.792,0.488	0.269	-0.143
ENSG00000110075.14	PPP6R3	chr11	+	68587926	68588024	68583042	68583129	68590659	68590714	217247	0,2	164,54	0,8	0.0482826	1.0,0.984	1.0,0.771	0.107	NA
ENSG00000110075.14	PPP6R3	chr11	+	68587944	68588024	68583042	68583129	68590659	68590714	107139	0,2	90,38	0,8	0.0439191	1.0,0.972	1.0,0.704	0.134	NA
ENSG00000110075.14	PPP6R3	chr11	+	68587797	68588024	68583042	68583129	68590659	68590714	103138	0,2	88,37	0,8	0.0440715	1.0,0.972	1.0,0.698	0.137	NA
ENSG00000110200.8	ANAPC15	chr11	-	72111441	72111496	72111156	72111286	72112649	72112774	49,39	0,2	22,10	4,2	0.0424067	1.0,0.919	0.762,0.744	0.207	NA
ENSG00000110429.13	FBXO3	chr11	-	33753110	33754500	33751522	33751607	33755770	33755975	76,75	1,0	41,23	2,4	0.02621	0.974,1.0	0.911,0.742	0.16	NA
ENSG00000110497.14	AMBRA1	chr11	-	46512726	46512813	46508190	46508370	46541944	46542981	23,15	12,24	9,9	27,41	0.0305554	0.489,0.238	0.143,0.099	0.242	-0.217
ENSG00000110514.19	MADD	chr11	+	47286432	47286534	47285270	47285590	47289390	47289493	170210	2,2	151,91	5,12	0.00357316	0.977,0.981	0.938,0.791	0.114	NA
ENSG00000110713.15	NUP98	chr11	-	3744508	3744649	3735190	3735324	3753315	3753408	50,57	8,6	66,47	0,3	0.0307554	0.758,0.826	1.0,0.887	-0.151	NA
ENSG00000110713.15	NUP98	chr11	-	3685972	3686194	3683199	3683441	3691346	3691489	44,83	5,6	73,39	1,0	0.00708394	0.815,0.874	0.973,1.0	-0.142	NA
ENSG00000110721.11	CHKA	chr11	-	68081403	68081457	68074716	68074830	68097018	68097130	33,44	0,1	50,22	3,4	0.0320993	1.0,0.963	0.907,0.763	0.147	0.147
ENSG00000110756.17	HPS5	chr11	-	18280508	18280642	18279617	18279942	18281949	18282220	2,3	8,2	0,0	4,7	0.0469626	0.111,0.429	0.0,0.0	0.27	NA
ENSG00000110768.11	GTF2H1	chr11	+	18351880	18351969	18347831	18347919	18352328	18352446	183188	4,2	45,12	8,12	2.60929e-05	0.958,0.979	0.738,0.333	0.433	NA
ENSG00000110841.13	PPFIBP1	chr12	+	27674191	27674221	27673766	27673827	27676427	27676599	29,42	35,36	18,16	43,43	0.0220416	0.374,0.457	0.232,0.212	0.193	NA
ENSG00000111011.17	RSRC2	chr12	-	122520503	122520581	122518838	122519029	122521384	122521428	38,23	59115	2,1	191280	0	0.244,0.091	0.005,0.002	0.164	NA
ENSG00000111237.18	VPS29	chr12	-	110499534	110499546	110496011	110496203	110502048	110502107	9,13	7,7	0,2	10,9	0.000325266	0.529,0.618	0.0,0.162	0.492	NA
ENSG00000111344.11	RASAL1	chr12	-	113101888	113102009	113100627	113100680	113105713	113105883	66,71	0,0	85,54	2,8	0.0041027	1.0,1.0	0.955,0.771	0.137	NA
ENSG00000111412.5	C12orf49	chr12	-	116723066	116723223	116720295	116720447	116737789	116738061	167247	12,13	304298	40,70	0.00110179	0.874,0.905	0.792,0.68	0.153	NA
ENSG00000111581.9	NUP107	chr12	+	68721117	68721177	68719577	68719654	68721840	68721986	205233	0,3	237181	7,23	5.00302e-05	1.0,0.978	0.95,0.815	0.107	NA
ENSG00000111596.11	CNOT2	chr12	+	70294070	70294294	70278131	70278274	70310894	70311017	12,27	90102	44,26	69,59	0.00278048	0.063,0.117	0.242,0.181	-0.121	NA
ENSG00000111596.11	CNOT2	chr12	+	70294236	70294294	70278131	70278274	70310894	70311017	6,22	90102	32,21	69,59	0.00510068	0.036,0.109	0.209,0.168	-0.116	NA
ENSG00000111596.11	CNOT2	chr12	+	70332766	70332846	70319297	70319364	70335437	70335563	104,97	79120	83,31	127167	0.00442105	0.397,0.288	0.246,0.085	0.177	NA
ENSG00000111615.12	KRR1	chr12	-	75503903	75504074	75501922	75502000	75506315	75506399	122130	0,0	95105	2,12	0.000407722	1.0,1.0	0.96,0.814	0.113	NA
ENSG00000111615.12	KRR1	chr12	-	75505197	75505254	75501922	75502000	75506315	75506399	44,43	0,0	31,47	2,12	0.000257051	1.0,1.0	0.899,0.692	0.205	NA
ENSG00000111647.12	UHRF1BP1L	chr12	-	100088914	100089095	100086274	100086358	100095666	100095837	56,81	0,2	69,96	7,5	0.0372758	1.0,0.953	0.831,0.906	0.108	NA
ENSG00000111670.14	GNPTAB	chr12	-	101756419	101756566	101753371	101753539	101757211	101757310	4,6	57,67	15,8	45,13	0.0036726	0.034,0.043	0.143,0.235	-0.15	NA
ENSG00000111696.11	NT5DC3	chr12	-	103785570	103785747	103785334	103785475	103787440	103787527	0,1	7,6	7,7	4,4	0.000288948	0.0,0.077	0.467,0.467	-0.429	NA
ENSG00000111711.9	GOLT1B	chr12	+	21508382	21508561	21506884	21506976	21512294	21512376	79,80	0,5	80,75	4,38	0.0450668	1.0,0.889	0.909,0.497	0.241	-0.147
ENSG00000111877.17	MCM9	chr6	-	118932606	118932740	118931489	118931738	118934890	118935024	27,37	2,2	18,13	5,7	0.0229419	0.871,0.902	0.643,0.481	0.325	-0.587
ENSG00000111880.15	RNGTT	chr6	-	88801563	88801632	88769773	88769874	88844356	88844521	60,54	3,2	53,38	6,11	0.0478265	0.913,0.934	0.822,0.644	0.191	NA
ENSG00000112118.17	MCM3	chr6	-	52265234	52265385	52264620	52264786	52266074	52266144	57,54	22,9	49,21	1,2	0.00755379	0.564,0.75	0.961,0.84	-0.243	NA
ENSG00000112200.16	ZNF451	chr6	+	57124733	57124859	57099060	57099141	57133041	57133176	29,50	1,5	42,42	0,0	0.0326756	0.935,0.833	1.0,1.0	-0.116	NA
ENSG00000112511.17	PHF1	chr6	+	33413735	33413831	33413408	33413557	33414040	33414109	88149	11,14	100118	27,46	0.000960024	0.8,0.842	0.649,0.562	0.215	-0.205
ENSG00000112531.16	QKI	chr6	+	163565945	163566795	163563419	163563719	163570693	163573800	82,94	1,1	86,74	6,7	0.00826125	0.976,0.979	0.878,0.841	0.118	NA
ENSG00000112576.12	CCND3	chr6	-	41940369	41940585	41937234	41937394	42048500	42048708	13,20	4,6	16,14	1,0	0.00488271	0.619,0.625	0.889,1.0	-0.323	NA
ENSG00000112640.14	PPP2R5D	chr6	+	43008692	43008746	43008366	43008475	43009056	43009227	219296	23,36	174,98	63,86	2.60315e-05	0.848,0.828	0.618,0.4	0.329	-0.162
ENSG00000112651.11	MRPL2	chr6	-	43055544	43055618	43054028	43054486	43055896	43056196	160259	32,73	165150	95,87	0.000220613	0.717,0.643	0.468,0.466	0.213	NA
ENSG00000112685.13	EXOC2	chr6	-	689138	689212	637700	637861	693018	693111	3,5	4,8	0,0	3,2	0.00671114	0.275,0.241	0.0,0.0	0.258	NA
ENSG00000112701.17	SENP6	chr6	+	75702644	75703072	75697424	75697517	75709526	75709630	213197	8,6	112,65	14,6	0.0309899	0.93,0.943	0.8,0.844	0.114	NA
ENSG00000112796.9	ENPP5	chr6	-	46170052	46170114	46167433	46168297	46170807	46170971	21,11	26,28	4,1	32,17	0.00358237	0.308,0.178	0.064,0.031	0.196	NA
ENSG00000112812.15	PRSS16	chr6	+	27254692	27254872	27252807	27252949	27254985	27255131	74,68	16,14	58,29	1,3	0.01579	0.698,0.708	0.967,0.829	-0.195	NA
ENSG00000112972.14	HMGCS1	chr5	-	43298008	43298134	43297001	43297166	43298517	43298975	159138	4,8	200166	19,36	0.00382491	0.952,0.896	0.84,0.697	0.155	NA
ENSG00000113108.17	APBB3	chr5	-	140562662	140562723	140562352	140562499	140563593	140563670	33,35	1,1	23,17	6,3	0.0212751	0.948,0.951	0.68,0.759	0.23	NA
ENSG00000113240.12	CLK4	chr5	-	178617343	178617434	178616881	178616948	178618555	178618778	67117	12,7	154178	2,3	0.00165803	0.736,0.893	0.975,0.967	-0.156	NA
ENSG00000113460.12	BRIX1	chr5	+	34919839	34919883	34915676	34915897	34922216	34922287	44,48	0,1	47,55	2,10	0.00645237	1.0,0.968	0.937,0.778	0.126	NA
ENSG00000113569.15	NUP155	chr5	-	37307296	37307432	37305056	37305210	37309128	37309267	124125	1,4	133,94	11,16	0.0011339	0.984,0.94	0.858,0.746	0.16	NA
ENSG00000113645.13	WWC1	chr5	+	168412004	168412129	168409921	168409995	168414347	168414590	0,1	10,8	5,3	13,2	0.0183101	0.0,0.059	0.161,0.429	-0.265	NA
ENSG00000113648.16	H2AFY	chr5	-	135352945	135353045	135345967	135346057	135360496	135360607	311330	9,19	303218	23,45	0.00666138	0.945,0.897	0.868,0.708	0.133	NA
ENSG00000113648.16	H2AFY	chr5	-	135350822	135350913	135345967	135346057	135360496	135360607	190243	9,19	171,82	23,45	0.014133	0.913,0.865	0.788,0.477	0.256	NA
ENSG00000113658.16	SMAD5	chr5	+	136147831	136147906	136132846	136132962	136153591	136153763	30,30	6,7	17,1	14,13	0.00295124	0.716,0.683	0.379,0.037	0.492	NA
ENSG00000113742.12	CPEB4	chr5	+	173932449	173932500	173910522	173910604	173944966	173945092	14,16	6,10	6,0	14,8	0.00616171	0.583,0.49	0.205,0.0	0.434	NA
ENSG00000113810.15	SMC4	chr3	+	160417722	160417956	160416250	160416415	160419357	160419543	157175	2,3	177118	9,13	0.00589733	0.975,0.967	0.908,0.819	0.108	NA
ENSG00000113971.18	NPHP3	chr3	-	132699352	132699450	132697259	132697362	132699917	132700061	90107	27,20	31,13	38,26	1.42291e-07	0.625,0.728	0.29,0.2	0.431	NA
ENSG00000114062.17	UBE3A	chr15	-	25411907	25411971	25405460	25405502	25438488	25438694	14,12	13,33	2,1	19,17	0.00584331	0.369,0.165	0.054,0.031	0.225	NA
ENSG00000114120.11	SLC25A36	chr3	+	140966933	140967036	140963126	140963227	140970926	140970993	45,48	81112	45,15	154191	0.000341416	0.217,0.176	0.127,0.038	0.114	NA
ENSG00000114209.14	PDCD10	chr3	-	167725400	167725473	167720061	167720273	167734213	167734345	20,22	5,9	19,13	20,25	0.0108798	0.671,0.555	0.326,0.21	0.345	NA
ENSG00000114268.11	PFKFB4	chr3	-	48539253	48539310	48538497	48538619	48539696	48539771	314427	41,52	437329	106103	0.000237999	0.814,0.825	0.702,0.646	0.145	-0.278
ENSG00000114346.13	ECT2	chr3	+	172818547	172818814	172816690	172816837	172820147	172820311	5,9	36,57	22,49	56,78	0.00218799	0.065,0.073	0.164,0.239	-0.133	NA
ENSG00000114346.13	ECT2	chr3	+	172760155	172760263	172758979	172759069	172761609	172761683	129179	2,4	217,87	18,18	0.000289733	0.97,0.957	0.858,0.707	0.181	NA
ENSG00000114439.18	BBX	chr3	+	107789786	107789876	107778370	107778519	107791239	107791299	109165	22,48	99,31	55,38	0.00473848	0.712,0.632	0.474,0.29	0.29	-0.304
ENSG00000114735.9	HEMK1	chr3	+	50578820	50578926	50577508	50577573	50579843	50579939	43,51	11,12	28,14	19,11	0.0314034	0.662,0.68	0.424,0.389	0.265	-0.381
ENSG00000114956.19	DGUOK	chr2	+	73957124	73957240	73926825	73927052	73958145	73958245	86116	24,24	77,60	38,55	0.0055416	0.642,0.707	0.503,0.353	0.246	NA
ENSG00000114988.11	LMAN2L	chr2	-	96737136	96737217	96734408	96734526	96737948	96738067	12,23	33,36	5,1	20,20	0.047815	0.154,0.242	0.111,0.024	0.131	NA
ENSG00000115020.16	PIKFYVE	chr2	+	208277536	208277708	208276711	208276830	208285725	208285933	20,18	2,4	17,21	0,0	0.00439936	0.833,0.692	1.0,1.0	-0.238	NA
ENSG00000115207.13	GTF3C2	chr2	-	27350313	27350632	27343330	27343578	27356738	27356999	6,6	8,19	0,0	13,9	0.00159078	0.273,0.136	0.0,0.0	0.205	NA
ENSG00000115282.19	TTC31	chr2	+	74490655	74490739	74490243	74490473	74491127	74491184	60,83	12,23	48,23	25,17	0.0439191	0.714,0.643	0.49,0.404	0.231	-0.357
ENSG00000115307.16	AUP1	chr2	-	74528416	74528489	74527939	74528006	74528750	74528935	53103	4,3	60,49	8,10	0.0471486	0.871,0.946	0.793,0.714	0.155	-0.157
ENSG00000115310.17	RTN4	chr2	-	54974694	54974764	54973562	54973621	54982514	54982653	323342	2,4	446302	22,48	8.80112e-08	0.988,0.978	0.913,0.766	0.143	NA
ENSG00000115310.17	RTN4	chr2	-	54973820	54973867	54973562	54973621	54982514	54982653	194188	2,4	264230	22,48	6.64017e-07	0.984,0.967	0.881,0.748	0.161	NA
ENSG00000115414.18	FN1	chr2	-	215392930	215393203	215391631	215391814	215394527	215394719	3,3	26,43	8,12	34,23	0.0350716	0.055,0.034	0.105,0.207	-0.112	NA
ENSG00000115421.12	PAPOLG	chr2	+	60794709	60794775	60793970	60794191	60794963	60795020	24,38	1,1	27,10	3,16	0.0146472	0.928,0.953	0.828,0.251	0.401	-0.124
ENSG00000115421.12	PAPOLG	chr2	+	60787510	60787620	60786946	60787066	60791760	60791882	40,59	0,1	60,41	5,4	0.0153672	1.0,0.967	0.857,0.837	0.137	NA
ENSG00000115459.17	ELMOD3	chr2	+	85371439	85371562	85371085	85371209	85377343	85377474	30,25	6,4	18,10	0,0	0.00180774	0.714,0.758	1.0,1.0	-0.264	NA
ENSG00000115649.15	CNPPD1	chr2	-	219174145	219174207	219173349	219173467	219174777	219174906	248296	6,3	187122	10,22	0.000176222	0.958,0.982	0.912,0.754	0.137	-0.127
ENSG00000115760.13	BIRC6	chr2	+	32524887	32525019	32518816	32518946	32525463	32525628	101104	0,1	92,44	6,5	0.00194595	1.0,0.981	0.885,0.815	0.14	NA
ENSG00000115966.16	ATF2	chr2	-	175121443	175121540	175118250	175118369	175130137	175130207	171183	22,40	173146	63,56	0.0113502	0.795,0.696	0.579,0.566	0.173	-0.135
ENSG00000115966.16	ATF2	chr2	-	175111567	175111654	175097443	175097593	175113993	175114108	142208	3,5	166101	7,18	0.0177563	0.959,0.954	0.922,0.737	0.127	NA
ENSG00000116001.15	TIA1	chr2	-	70225327	70225393	70224553	70224629	70227734	70227839	64,62	38,56	32,16	69,66	2.71949e-05	0.474,0.372	0.199,0.115	0.266	NA
ENSG00000116001.15	TIA1	chr2	-	70228343	70228462	70227734	70227822	70229058	70229091	32,50	9,11	22,11	14,31	0.00708394	0.64,0.694	0.44,0.151	0.372	NA
ENSG00000116001.15	TIA1	chr2	-	70228343	70228462	70227734	70227822	70229263	70229318	22,32	8,17	10,8	25,24	0.000119419	0.579,0.485	0.167,0.143	0.377	NA
ENSG00000116039.11	ATP6V1B1	chr2	+	70963161	70963312	70962776	70962900	70963571	70963654	14,9	7,7	21,26	3,3	0.0404154	0.5,0.391	0.778,0.813	-0.35	NA
ENSG00000116212.14	LRRC42	chr1	+	53947787	53947821	53946076	53946549	53951985	53952472	38,43	22,36	28,14	59,46	0.000397838	0.545,0.453	0.248,0.174	0.288	-0.291
ENSG00000116260.16	QSOX1	chr1	+	180190432	180190580	180186052	180186182	180196261	180204030	9,16	0,1	6,4	2,2	0.0274598	1.0,0.889	0.6,0.5	0.394	NA
ENSG00000116478.11	HDAC1	chr1	+	32327405	32327458	32326938	32327077	32327535	32327674	6,8	92155	15,19	58,31	1.88318e-05	0.037,0.03	0.132,0.266	-0.166	NA
ENSG00000116580.18	GON4L	chr1	-	155832831	155832950	155826836	155827028	155853275	155853405	0,0	18,28	4,5	17,20	0.00912674	0.0,0.0	0.105,0.111	-0.108	NA
ENSG00000116698.20	SMG7	chr1	+	183547102	183547252	183545965	183546337	183549763	183549923	23,34	0,0	40,37	2,9	0.0020397	1.0,1.0	0.909,0.673	0.209	NA
ENSG00000116731.22	PRDM2	chr1	+	13773077	13773188	13749360	13749487	13816426	13816570	17,18	0,1	20,22	2,8	0.0110651	1.0,0.9	0.833,0.579	0.244	NA
ENSG00000116747.12	TROVE2	chr1	+	193059873	193060222	193059658	193059776	193069033	193069179	8,18	10,17	25,43	10,14	0.0493511	0.286,0.346	0.556,0.606	-0.265	NA
ENSG00000116750.13	UCHL5	chr1	-	193020306	193020381	193018621	193018820	193021096	193021195	18,24	15,23	11,1	24,14	0.0273838	0.377,0.344	0.187,0.035	0.249	NA
ENSG00000116791.13	CRYZ	chr1	-	74707102	74707204	74706898	74706994	74710097	74710247	116105	4,9	87,55	11,21	0.026051	0.935,0.854	0.798,0.567	0.212	-0.415
ENSG00000116906.11	GNPAT	chr1	+	231262722	231262852	231260506	231260683	231265292	231265420	175157	0,5	103,59	5,7	0.0326756	1.0,0.94	0.912,0.808	0.11	NA
ENSG00000116918.13	TSNAX	chr1	+	231563464	231563629	231561127	231561255	231564527	231566524	23,17	36,48	27,57	25,31	0.00864982	0.242,0.15	0.351,0.479	-0.219	0.104
ENSG00000116977.18	LGALS8	chr1	+	236542914	236543040	236542760	236542787	236543559	236543648	103116	72,84	52,59	122,96	9.05008e-06	0.417,0.408	0.176,0.235	0.207	NA
ENSG00000117139.16	KDM5B	chr1	-	202766925	202767060	202764048	202764145	202773117	202773288	9391216	8,23	1161500	40106	6.66374e-06	0.983,0.964	0.936,0.702	0.155	NA
ENSG00000117280.12	RAB29	chr1	-	205772495	205772567	205771471	205771653	205774832	205775086	119133	1,0	105,62	5,12	8.74429e-05	0.984,1.0	0.915,0.726	0.171	-0.139
ENSG00000117305.14	HMGCL	chr1	-	23814189	23814338	23808134	23808323	23816674	23816770	227272	25,44	224161	76105	8.43981e-05	0.819,0.756	0.596,0.434	0.272	-0.281
ENSG00000117305.14	HMGCL	chr1	-	23810735	23810799	23808134	23808323	23816674	23816770	102139	25,44	140105	76105	0.00414011	0.689,0.632	0.5,0.352	0.234	NA
ENSG00000117308.14	GALE	chr1	-	23798886	23799012	23798379	23798730	23799365	23799436	25,32	5,8	26,24	2,0	0.018838	0.714,0.667	0.867,1.0	-0.243	NA
ENSG00000117335.18	CD46	chr1	+	207767778	207767823	207767012	207767195	207770320	207770362	322362	170202	297207	339312	4.04084e-08	0.544,0.53	0.356,0.295	0.212	-0.179
ENSG00000117448.13	AKR1A1	chr1	+	45568484	45568684	45568146	45568177	45568926	45569006	246296	36,32	279241	10,6	2.95616e-05	0.774,0.822	0.933,0.953	-0.145	-0.138
ENSG00000117475.13	BLZF1	chr1	+	169378329	169378529	169376539	169376979	169380480	169380609	143143	0,1	95,39	5,3	0.011818	1.0,0.986	0.905,0.867	0.107	NA
ENSG00000117523.15	PRRC2C	chr1	+	171587647	171587751	171587002	171587221	171588378	171588505	264257	2,0	190,71	10,5	0.000251762	0.985,1.0	0.905,0.877	0.101	NA
ENSG00000117543.19	DPH5	chr1	-	100992636	100992740	100989622	100990631	100995109	100995149	75101	0,9	43,38	12,12	0.000999228	1.0,0.849	0.642,0.613	0.297	NA
ENSG00000117620.12	SLC35A3	chr1	+	99974970	99975069	99970452	99970644	99993536	99993741	23,22	11,14	15,5	27,21	0.00345903	0.511,0.44	0.217,0.106	0.314	-0.527
ENSG00000117620.12	SLC35A3	chr1	+	99974970	99975069	99969978	99970162	99993536	99993741	28,31	33,43	13,9	61,52	0.000199998	0.298,0.265	0.096,0.08	0.193	NA
ENSG00000117625.13	RCOR3	chr1	+	211304082	211304140	211295675	211295753	211312354	211312487	69,84	1,1	56,57	9,12	2.62759e-05	0.975,0.979	0.78,0.73	0.222	NA
ENSG00000117625.13	RCOR3	chr1	+	211295675	211295753	211289177	211289396	211312354	211312487	62,51	0,5	51,57	13,23	0.000432076	1.0,0.836	0.662,0.553	0.31	NA
ENSG00000117625.13	RCOR3	chr1	+	211304082	211304140	211289177	211289396	211312354	211312487	20,25	0,5	30,31	13,23	0.0200277	1.0,0.74	0.567,0.434	0.37	NA
ENSG00000117868.15	ESYT2	chr7	-	158752780	158752843	158749648	158749723	158759485	158759581	883872	135235	455303	201187	3.35188e-05	0.782,0.67	0.553,0.47	0.214	-0.146
ENSG00000117868.15	ESYT2	chr7	-	158767653	158767774	158764676	158764853	158788003	158788093	541553	0,1	326278	9,26	1.3136e-09	1.0,0.996	0.948,0.842	0.103	NA
ENSG00000117868.15	ESYT2	chr7	-	158773340	158773396	158764676	158764853	158788003	158788093	409422	0,1	298210	9,26	8.08091e-09	1.0,0.996	0.95,0.823	0.112	NA
ENSG00000118058.20	KMT2A	chr11	+	118484861	118484975	118484182	118484314	118488613	118488760	248340	1,2	233154	8,15	3.25868e-05	0.992,0.988	0.936,0.837	0.103	NA
ENSG00000118193.11	KIF14	chr1	-	200614317	200614405	200608829	200608928	200615354	200615609	93110	0,2	119,39	6,6	0.00740026	1.0,0.965	0.908,0.765	0.146	NA
ENSG00000118194.18	TNNT2	chr1	-	201369815	201369845	201368161	201368227	201372026	201372045	13,18	9,5	2,0	9,1	0.00436139	0.51,0.722	0.138,0.0	0.547	NA
ENSG00000118200.14	CAMSAP2	chr1	+	200844781	200844869	200841993	200842087	200847209	200847292	111149	0,2	104,34	5,8	0.00102203	1.0,0.974	0.912,0.68	0.191	NA
ENSG00000118454.12	ANKRD13C	chr1	-	70306223	70306290	70300763	70300908	70313744	70313790	47,65	0,0	46,12	4,5	0.000562567	1.0,1.0	0.859,0.561	0.29	NA
ENSG00000118495.18	PLAGL1	chr6	-	143947984	143948460	143940745	143942663	143960468	143960542	15,13	4,2	15,10	1,0	0.0383355	0.652,0.765	0.882,1.0	-0.233	NA
ENSG00000118513.18	MYB	chr6	+	135187833	135187905	135185902	135186020	135189790	135189883	138126	0,1	41,22	0,6	0.0337244	1.0,0.985	1.0,0.653	0.166	NA
ENSG00000118518.15	RNF146	chr6	+	127286049	127286177	127280230	127280340	127286615	127286903	24,28	22,28	12,4	17,62	0.00779076	0.353,0.333	0.261,0.031	0.197	NA
ENSG00000118620.12	ZNF430	chr19	+	21022788	21022881	21020633	21020803	21033455	21033582	73,72	0,1	65,44	4,6	0.00401896	1.0,0.973	0.89,0.786	0.148	NA
ENSG00000118655.4	DCLRE1B	chr1	+	113906995	113907161	113905140	113905775	113908008	113908191	187196	39,34	264201	16,17	0.00141312	0.706,0.742	0.892,0.855	-0.149	NA
ENSG00000118961.14	LDAH	chr2	-	20790254	20790398	20774809	20774979	20801309	20801465	68105	8,11	73,93	3,1	0.0177952	0.81,0.827	0.924,0.979	-0.133	NA
ENSG00000119048.7	UBE2B	chr5	+	134388324	134388413	134374382	134374463	134390224	134391992	375352	3,4	287237	8,36	2.41764e-05	0.984,0.978	0.947,0.767	0.124	NA
ENSG00000119048.7	UBE2B	chr5	+	134376668	134376694	134374382	134374463	134390224	134390573	67,70	3,4	66,43	8,36	0.016083	0.944,0.929	0.861,0.473	0.269	NA
ENSG00000119139.16	TJP2	chr9	+	69249374	69249485	69248011	69248224	69251034	69251364	285302	4,10	230,80	11,19	0.00752191	0.973,0.938	0.913,0.678	0.16	NA
ENSG00000119139.16	TJP2	chr9	+	69251034	69251364	69248011	69248224	69252814	69252900	96119	2,12	106,77	18,46	0.00803565	0.96,0.832	0.746,0.456	0.295	NA
ENSG00000119231.10	SENP5	chr3	+	196927795	196927879	196903532	196903610	196929632	196929683	41,60	5,6	31,21	15,29	0.000287597	0.804,0.833	0.508,0.266	0.431	-0.393
ENSG00000119383.19	PPP2R4	chr9	+	129127963	129128068	129120512	129120610	129128984	129129110	24,28	4,2	6,10	7,5	0.0226847	0.75,0.875	0.3,0.5	0.412	NA
ENSG00000119414.11	PPP6C	chr9	-	125160840	125160906	125153953	125153985	125171084	125171180	226211	15,16	187137	23,27	0.0481049	0.89,0.876	0.813,0.731	0.111	NA
ENSG00000119414.11	PPP6C	chr9	-	125160840	125160906	125158240	125158382	125171084	125171180	577617	15,21	545408	42,57	4.03711e-06	0.954,0.94	0.874,0.793	0.113	NA
ENSG00000119471.14	HSDL2	chr9	+	112416840	112416944	112405623	112405722	112418859	112418958	124139	4,2	62,26	7,4	0.0254962	0.939,0.972	0.816,0.765	0.165	NA
ENSG00000119541.9	VPS4B	chr18	-	63407431	63407499	63403706	63403826	63410289	63410446	100133	1,4	95,65	4,14	0.0200477	0.981,0.946	0.926,0.71	0.145	NA
ENSG00000119596.17	YLPM1	chr14	+	74824255	74824307	74821056	74821137	74829212	74829343	72,73	16,13	32,15	15,20	0.022204	0.728,0.77	0.559,0.309	0.315	-0.16
ENSG00000119684.15	MLH3	chr14	-	75033418	75033490	75032067	75032179	75046375	75046825	24,23	0,1	24,6	3,5	0.0056727	1.0,0.922	0.804,0.381	0.369	NA
ENSG00000119685.19	TTLL5	chr14	+	75757830	75757869	75752892	75752955	75764614	75764772	13,9	19,51	3,0	29,24	0.0134382	0.312,0.105	0.064,0.0	0.176	NA
ENSG00000120008.15	WDR11	chr10	+	120873838	120873923	120871169	120871346	120883779	120883888	17,29	0,0	29,8	1,6	0.00587784	1.0,1.0	0.935,0.4	0.333	NA
ENSG00000120158.11	RCL1	chr9	+	4833153	4833228	4826857	4827033	4834140	4834265	114136	0,0	102,86	5,11	4.94678e-05	1.0,1.0	0.911,0.797	0.146	NA
ENSG00000120159.11	CAAP1	chr9	-	26886103	26886188	26884809	26884885	26887312	26887478	62,84	0,0	40,23	2,6	0.00122792	1.0,1.0	0.909,0.657	0.217	NA
ENSG00000120334.15	CENPL	chr1	-	173806438	173806576	173802962	173803505	173807266	173807518	16,21	23,30	39,45	20,27	0.0256007	0.258,0.259	0.494,0.455	-0.216	-0.116
ENSG00000120334.15	CENPL	chr1	-	173806458	173806576	173802962	173803505	173807266	173807518	4,7	23,30	21,19	20,27	0.00574323	0.08,0.104	0.344,0.26	-0.21	NA
ENSG00000120539.14	MASTL	chr10	+	27173117	27173259	27169943	27171083	27186378	27186718	27,17	0,0	17,7	2,3	0.00796807	1.0,1.0	0.81,0.538	0.326	NA
ENSG00000120685.19	PROSER1	chr13	-	39034130	39034196	39031562	39031631	39037197	39037294	80,67	7,4	51,22	10,16	0.0230292	0.86,0.9	0.732,0.424	0.302	-0.335
ENSG00000120699.12	EXOSC8	chr13	+	37002272	37002309	37001748	37001801	37002487	37002551	14,17	0,0	9,20	0,8	0.00894882	1.0,1.0	1.0,0.628	0.186	-0.184
ENSG00000120860.10	CCDC53	chr12	-	102050517	102050639	102046053	102046119	102061247	102061346	12,18	74113	24,22	78,38	0.0288135	0.075,0.074	0.133,0.224	-0.104	NA
ENSG00000120868.13	APAF1	chr12	+	98703370	98703499	98699407	98699569	98706484	98706610	100102	35,59	54,14	85,92	4.88568e-07	0.588,0.464	0.241,0.071	0.37	-0.281
ENSG00000120896.13	SORBS3	chr8	+	22566344	22566484	22565282	22565354	22566660	22566713	76,72	0,1	50,24	6,6	0.000157776	1.0,0.973	0.806,0.667	0.25	NA
ENSG00000120896.13	SORBS3	chr8	+	22565825	22566484	22565267	22565354	22566660	22566713	81,75	0,1	50,22	6,6	0.000121225	1.0,0.974	0.806,0.647	0.26	NA
ENSG00000120896.13	SORBS3	chr8	+	22565825	22565872	22565267	22565354	22566660	22566868	26,11	0,1	7,10	6,6	7.28172e-05	1.0,0.872	0.42,0.508	0.472	NA
ENSG00000121067.17	SPOP	chr17	-	49636758	49636809	49622732	49622876	49677932	49678005	13,5	42,42	1,0	33,16	0.00426473	0.157,0.067	0.018,0.0	0.103	NA
ENSG00000121152.9	NCAPH	chr2	+	96353305	96353397	96351830	96352020	96354182	96354388	63,54	0,0	77,51	1,9	0.0056727	1.0,1.0	0.975,0.739	0.143	NA
ENSG00000121390.18	PSPC1	chr13	-	19709541	19709599	19705661	19705831	19730238	19730344	98,93	1,1	47,29	4,5	0.00423478	0.982,0.981	0.87,0.767	0.163	NA
ENSG00000121621.6	KIF18A	chr11	-	28090616	28090727	28088523	28088721	28091408	28091513	46,85	0,4	98,60	8,17	0.014344	1.0,0.914	0.86,0.638	0.208	NA
ENSG00000121892.14	PDS5A	chr4	-	39866860	39867015	39863335	39863459	39869393	39869462	72,78	1,0	60,35	5,3	0.0110442	0.973,1.0	0.857,0.854	0.131	NA
ENSG00000121892.14	PDS5A	chr4	-	39926774	39926861	39925835	39925933	39927960	39928164	136175	4,13	107,46	19,18	0.0011339	0.944,0.871	0.738,0.561	0.258	NA
ENSG00000121903.14	ZSCAN20	chr1	+	33489114	33489191	33488464	33488651	33491024	33491702	8,14	1,1	2,0	3,3	0.000340927	0.8,0.875	0.25,0.0	0.713	NA
ENSG00000121940.15	CLCC1	chr1	-	108962308	108962469	108950308	108950448	108963360	108963450	10,13	2,4	2,5	3,8	0.0401436	0.714,0.619	0.25,0.238	0.422	NA
ENSG00000122042.9	UBL3	chr13	-	29777154	29777263	29767617	29767695	29849511	29850684	91127	0,0	120,88	2,10	0.00235229	1.0,1.0	0.968,0.815	0.109	NA
ENSG00000122203.14	KIAA1191	chr5	-	176355570	176355749	176348249	176348356	176359810	176359918	12,13	1,8	5,18	0,0	0.00125819	0.857,0.448	1.0,1.0	-0.348	NA
ENSG00000122299.11	ZC3H7A	chr16	-	11769030	11769095	11768314	11768501	11770782	11770841	141135	2,2	111,41	10,12	0.000154096	0.974,0.973	0.857,0.648	0.221	NA
ENSG00000122882.10	ECD	chr10	-	73163732	73163950	73160433	73160551	73167865	73168064	117118	1,8	105,50	11,14	0.0137619	0.983,0.881	0.827,0.641	0.198	NA
ENSG00000123124.13	WWP1	chr8	+	86435632	86435704	86435451	86435527	86438584	86438673	722830	12,15	674376	39,62	3.68448e-08	0.969,0.966	0.899,0.757	0.139	NA
ENSG00000123130.16	ACOT9	chrX	-	23734340	23734367	23733171	23733217	23735918	23736016	16,13	56,57	4,0	48,29	0.00579846	0.175,0.145	0.058,0.0	0.131	NA
ENSG00000123179.13	EBPL	chr13	-	49669776	49669846	49660722	49661208	49691253	49691463	46,81	6,4	60,66	15,16	0.0429871	0.8,0.913	0.676,0.682	0.177	NA
ENSG00000123219.12	CENPK	chr5	-	65554796	65554946	65552492	65552549	65561496	65561564	13,11	1,0	17,4	3,4	0.0130868	0.867,1.0	0.739,0.333	0.397	NA
ENSG00000123219.12	CENPK	chr5	-	65554796	65554898	65552492	65552549	65561496	65561564	11,11	1,0	14,2	3,4	0.00862409	0.846,1.0	0.7,0.2	0.473	NA
ENSG00000123297.17	TSFM	chr12	+	57792985	57793073	57787039	57787162	57796176	57796367	225209	9,11	191127	21,43	0.00212824	0.926,0.905	0.82,0.596	0.208	NA
ENSG00000123352.17	SPATS2	chr12	+	49406472	49406565	49367517	49367587	49460769	49461037	5,6	8,9	0,0	9,9	0.000693356	0.238,0.25	0.0,0.0	0.244	NA
ENSG00000123562.16	MORF4L2	chrX	-	103684680	103684729	103678498	103678651	103685170	103685260	272232	292311	140,73	367380	9.4447e-10	0.362,0.313	0.189,0.105	0.191	-0.206
ENSG00000123562.16	MORF4L2	chrX	-	103684680	103684729	103678498	103678600	103685170	103685260	253224	236300	131,65	315302	1.66107e-07	0.395,0.313	0.202,0.116	0.195	NA
ENSG00000123562.16	MORF4L2	chrX	-	103684680	103684729	103678498	103678620	103685170	103685260	220196	48,34	102,55	42,35	0.00290869	0.736,0.779	0.597,0.489	0.215	NA
ENSG00000123562.16	MORF4L2	chrX	-	103684680	103684729	103676494	103677051	103685170	103685260	212189	65,83	96,56	90131	4.71791e-05	0.665,0.581	0.394,0.207	0.323	NA
ENSG00000123595.6	RAB9A	chrX	+	13703813	13703902	13689124	13689288	13708720	13710506	200197	52,71	200200	91204	0.0482391	0.658,0.581	0.524,0.329	0.193	NA
ENSG00000123636.17	BAZ2B	chr2	-	159400598	159400664	159398828	159398894	159404848	159404910	58,76	2,3	29,7	10,1	0.0127615	0.94,0.931	0.608,0.789	0.237	-0.323
ENSG00000124126.13	PREX1	chr20	-	48659918	48660061	48658135	48658228	48666282	48666355	97,98	0,0	85,20	4,6	0.000671431	1.0,1.0	0.914,0.625	0.23	NA
ENSG00000124164.15	VAPB	chr20	+	58438944	58439025	58418210	58418363	58440906	58441083	298364	6,11	396211	18,38	0.0036726	0.961,0.943	0.917,0.735	0.126	NA
ENSG00000124181.14	PLCG1	chr20	+	41163202	41163275	41162641	41162725	41163377	41163479	94104	10,7	71,41	14,15	0.0337425	0.827,0.883	0.721,0.582	0.204	-0.182
ENSG00000124193.14	SRSF6	chr20	+	43459152	43459420	43458360	43458509	43459770	43459895	88137	49,42	110136	19,5	0.0015348	0.473,0.62	0.743,0.932	-0.291	0.399
ENSG00000124222.21	STX16	chr20	+	58669301	58669453	58667986	58668127	58670511	58670603	427507	177145	577467	74,14	2.5797e-08	0.547,0.636	0.796,0.943	-0.278	NA
ENSG00000124222.21	STX16	chr20	+	58669290	58669453	58667986	58668127	58670511	58670603	720843	177145	958779	74,14	1.69716e-12	0.67,0.744	0.866,0.965	-0.208	NA
ENSG00000124222.21	STX16	chr20	+	58659622	58659634	58652072	58652087	58667489	58667597	85,68	155196	52,27	296228	1.05346e-05	0.324,0.232	0.133,0.094	0.165	NA
ENSG00000124222.21	STX16	chr20	+	58659622	58659634	58651282	58652138	58667489	58667597	90,66	24,31	39,19	40,39	0.000968508	0.766,0.65	0.46,0.298	0.329	NA
ENSG00000124224.16	PPP4R1L	chr20	-	58236153	58236274	58235276	58235374	58238210	58238311	120,88	10,3	29,18	0,0	0.0155552	0.857,0.936	1.0,1.0	-0.103	NA
ENSG00000124313.12	IQSEC2	chrX	-	53279563	53279659	53266328	53267064	53281495	53281594	11,10	0,0	19,21	3,9	0.000632564	1.0,1.0	0.76,0.538	0.351	NA
ENSG00000124357.12	NAGK	chr2	+	71075554	71075610	71073481	71073594	71076603	71076701	116124	1,1	77,45	1,9	0.0108873	0.985,0.986	0.978,0.743	0.125	NA
ENSG00000124357.12	NAGK	chr2	+	71075561	71075642	71073481	71073594	71076603	71076701	84,80	1,1	66,27	1,9	0.0254559	0.977,0.976	0.971,0.6	0.191	NA
ENSG00000124571.17	XPO5	chr6	-	43573479	43573601	43570856	43570994	43575759	43576075	15,16	3,3	30,33	0,0	0.00338542	0.714,0.727	1.0,1.0	-0.28	NA
ENSG00000124788.17	ATXN1	chr6	-	16326393	16328470	16299111	16306859	16485971	16486109	147185	2,1	164,94	6,12	0.00164012	0.974,0.989	0.932,0.797	0.117	NA
ENSG00000124789.11	NUP153	chr6	-	17649162	17649300	17646066	17646154	17661652	17661779	42,49	0,0	38,18	1,6	0.00569454	1.0,1.0	0.95,0.6	0.225	NA
ENSG00000124789.11	NUP153	chr6	-	17649162	17649300	17639938	17640064	17661652	17661779	41,49	1,0	38,19	2,7	0.00562116	0.953,1.0	0.905,0.576	0.236	NA
ENSG00000124942.13	AHNAK	chr11	-	62491731	62491831	62433545	62433891	62535002	62535190	89128	6,17	68,53	20,33	0.00202962	0.881,0.79	0.63,0.445	0.298	NA
ENSG00000125304.8	TM9SF2	chr13	+	99537738	99537863	99536607	99536737	99540713	99540793	120148	3,4	103107	18,39	4.64874e-07	0.952,0.949	0.741,0.578	0.291	NA
ENSG00000125319.14	C17orf53	chr17	+	44152636	44152777	44150960	44151044	44154555	44154664	10,23	0,0	23,11	2,3	0.0185687	1.0,1.0	0.852,0.647	0.25	NA
ENSG00000125347.13	IRF1	chr5	-	132489391	132489483	132486953	132487130	132490544	132490726	30,36	2,4	37,54	1,0	0.0424648	0.882,0.818	0.949,1.0	-0.124	NA
ENSG00000125351.10	UPF3B	chrX	-	119840645	119840684	119838366	119838527	119841075	119841258	12,12	12,22	5,2	27,37	0.00190796	0.399,0.266	0.109,0.035	0.261	-0.152
ENSG00000125386.14	FAM193A	chr4	+	2708145	2708268	2699679	2700544	2716022	2716104	8,7	37,50	22,21	32,27	0.00102203	0.098,0.065	0.256,0.28	-0.186	NA
ENSG00000125447.16	GGA3	chr17	-	75243062	75243258	75242883	75242911	75243446	75243570	46,68	7,3	73,94	1,1	0.0161378	0.767,0.919	0.973,0.979	-0.133	NA
ENSG00000125676.19	THOC2	chrX	-	123623643	123623709	123623104	123623283	123623786	123623971	64,75	66,64	23,14	67,29	0.00142799	0.342,0.386	0.155,0.205	0.184	NA
ENSG00000125772.12	GPCPD1	chr20	-	5586193	5586269	5584280	5584322	5593326	5593411	8,8	21,12	1,0	24,20	0.000214165	0.16,0.25	0.02,0.0	0.195	-0.506
ENSG00000125812.15	GZF1	chr20	+	23367002	23367097	23364383	23365747	23368761	23368929	17,16	0,1	15,14	3,3	0.0250934	1.0,0.889	0.714,0.7	0.238	NA
ENSG00000125844.15	RRBP1	chr20	-	17679998	17680075	17659979	17660528	17682027	17682283	54,49	101136	13,9	95,75	0.000145661	0.211,0.153	0.064,0.057	0.121	-0.198
ENSG00000125885.13	MCM8	chr20	+	5972006	5972037	5967877	5968025	5973055	5973196	9,12	0,0	5,3	3,3	0.000146924	1.0,1.0	0.543,0.417	0.52	NA
ENSG00000125970.11	RALY	chr20	+	34073818	34073866	34073562	34073635	34075873	34076039	301331	112123	200160	118107	0.0163582	0.623,0.623	0.51,0.479	0.129	NA
ENSG00000126001.15	CEP250	chr20	+	35474793	35474852	35474000	35474052	35475501	35475646	7,6	9,16	1,0	10,15	0.00246995	0.305,0.175	0.053,0.0	0.213	NA
ENSG00000126070.19	AGO3	chr1	+	35982620	35982712	35973374	35973511	36004340	36004475	13,8	12,25	3,4	32,31	0.018973	0.351,0.138	0.045,0.061	0.192	NA
ENSG00000126453.9	BCL2L12	chr19	+	49668850	49668937	49666684	49666799	49673697	49673916	9,6	2,2	25,22	0,0	0.0180505	0.692,0.6	1.0,1.0	-0.354	NA
ENSG00000126457.21	PRMT1	chr19	+	49679871	49679925	49677271	49677316	49680486	49680588	28,46	6,13	25,21	23,13	0.0302738	0.732,0.675	0.389,0.486	0.266	NA
ENSG00000126581.12	BECN1	chr17	-	42812230	42812356	42811654	42811797	42813947	42813989	7,11	60,93	23,14	45,35	0.00132987	0.055,0.056	0.204,0.167	-0.13	NA
ENSG00000126698.10	DNAJC8	chr1	-	28230130	28230252	28228921	28229023	28232920	28233025	22,25	33,38	8,11	48,38	0.0130756	0.25,0.248	0.077,0.126	0.147	NA
ENSG00000126746.17	ZNF384	chr12	-	6678662	6678710	6678126	6678460	6678945	6679183	51,78	25,35	36,42	64,48	0.000380453	0.556,0.578	0.257,0.35	0.263	NA
ENSG00000126777.17	KTN1	chr14	+	55663954	55664041	55661521	55661612	55667240	55667330	78,68	114127	44,16	146108	0.000173552	0.255,0.211	0.131,0.069	0.133	-0.173
ENSG00000126777.17	KTN1	chr14	+	55673171	55673255	55672928	55673012	55675834	55675918	89,68	204242	29,18	237197	6.81217e-07	0.179,0.123	0.058,0.044	0.1	NA
ENSG00000126777.17	KTN1	chr14	+	55663954	55664041	55661521	55661612	55670728	55670809	53,49	13,11	23,13	17,16	0.00395755	0.671,0.69	0.404,0.289	0.334	NA
ENSG00000126787.12	DLGAP5	chr14	-	55148593	55148684	55148111	55148473	55150798	55150848	114160	35,30	283281	28,10	0.00017534	0.62,0.727	0.835,0.934	-0.211	NA
ENSG00000126858.16	RHOT1	chr17	+	32221048	32221186	32211115	32211238	32224615	32225503	5,6	4,13	2,1	13,16	0.0462869	0.385,0.188	0.071,0.03	0.236	NA
ENSG00000126858.16	RHOT1	chr17	+	32172936	32173060	32171042	32171101	32173830	32173912	13,9	4,8	5,1	12,10	0.0221411	0.619,0.36	0.172,0.048	0.38	NA
ENSG00000127054.18	CPSF3L	chr1	-	1314300	1314365	1313731	1313921	1314823	1314962	104139	3,9	108,60	22,12	0.0013341	0.949,0.893	0.726,0.73	0.193	-0.24
ENSG00000127081.13	ZNF484	chr9	-	92875014	92875059	92856191	92856318	92877889	92878008	16,18	9,6	4,6	12,9	0.0264603	0.528,0.654	0.174,0.296	0.356	NA
ENSG00000127481.14	UBR4	chr1	-	19146022	19146106	19145792	19145933	19146825	19147000	7,21	62,75	37,26	53,60	0.00835654	0.053,0.123	0.259,0.178	-0.131	NA
ENSG00000127483.17	HP1BP3	chr1	-	20780344	20780540	20779811	20779911	20787194	20787272	137152	18,23	216199	10,13	0.0202495	0.792,0.768	0.915,0.884	-0.119	0.11
ENSG00000127947.15	PTPN12	chr7	+	77581426	77581503	77571077	77571186	77585542	77585581	191271	4,13	282226	18,31	0.0223956	0.96,0.912	0.887,0.785	0.1	NA
ENSG00000127947.15	PTPN12	chr7	+	77583554	77583650	77571152	77571186	77585542	77585581	214215	4,13	231151	18,31	0.00865361	0.964,0.892	0.865,0.709	0.141	NA
ENSG00000127989.13	MTERF1	chr7	-	91876877	91876978	91873321	91874764	91880054	91880113	4,11	21,20	3,0	19,24	0.033158	0.087,0.216	0.073,0.0	0.115	NA
ENSG00000128000.15	ZNF780B	chr19	-	40055415	40055576	40050323	40050377	40056100	40056175	10,14	5,2	9,6	1,0	0.0391722	0.5,0.778	0.818,1.0	-0.27	-0.261
ENSG00000128513.14	POT1	chr7	-	124846941	124846998	124842806	124842963	124851871	124851951	92110	0,1	51,22	3,3	0.032957	1.0,0.984	0.907,0.808	0.134	NA
ENSG00000128567.16	PODXL	chr7	-	131510235	131510331	131509364	131509585	131510827	131511433	55,86	83,78	44,38	25,9	0.0397826	0.249,0.355	0.468,0.679	-0.272	NA
ENSG00000128699.13	ORMDL1	chr2	-	189783013	189783123	189782421	189782602	189784268	189784371	40,44	2,2	17,21	11,10	4.16098e-05	0.909,0.917	0.436,0.512	0.439	NA
ENSG00000128833.12	MYO5C	chr15	-	52271762	52271844	52269752	52269860	52272579	52272723	179196	9,7	141,91	36,74	1.36094e-06	0.909,0.933	0.662,0.381	0.399	-0.248
ENSG00000128833.12	MYO5C	chr15	-	52282781	52282892	52279508	52279674	52295609	52295656	107104	1,0	85,86	10,12	4.21041e-06	0.982,1.0	0.81,0.782	0.195	NA
ENSG00000128833.12	MYO5C	chr15	-	52282781	52282884	52279508	52279674	52295609	52295773	78,74	1,0	54,62	10,12	1.72033e-06	0.975,1.0	0.73,0.721	0.262	NA
ENSG00000128891.15	C15orf57	chr15	-	40553594	40554127	40531330	40532302	40557215	40557372	43,53	9,7	30,50	1,2	0.0428674	0.705,0.791	0.938,0.926	-0.184	NA
ENSG00000128915.11	ICE2	chr15	-	60478567	60478637	60477936	60478069	60479002	60479112	0,0	9,10	7,0	10,6	0.0170908	0.0,0.0	0.267,0.0	-0.134	NA
ENSG00000128915.11	ICE2	chr15	-	60478567	60478650	60477936	60478069	60479002	60479107	0,0	9,10	6,0	10,6	0.0395854	0.0,0.0	0.231,0.0	-0.116	NA
ENSG00000129197.14	RPAIN	chr17	+	5426235	5426299	5422768	5422829	5432541	5432876	14,16	29,38	6,6	37,48	0.0315016	0.208,0.186	0.081,0.064	0.124	-0.137
ENSG00000129197.14	RPAIN	chr17	+	5425970	5426082	5422768	5422829	5432541	5432608	84111	29,38	63,50	37,48	0.0328786	0.592,0.594	0.46,0.342	0.192	NA
ENSG00000129197.14	RPAIN	chr17	+	5425970	5428211	5422768	5422829	5432541	5432704	192201	29,38	101,99	37,48	0.00104285	0.768,0.726	0.577,0.508	0.205	NA
ENSG00000129197.14	RPAIN	chr17	+	5425970	5426299	5422768	5422829	5432541	5432876	77109	29,38	57,43	37,48	0.0194503	0.57,0.589	0.435,0.309	0.207	NA
ENSG00000129197.14	RPAIN	chr17	+	5428070	5428211	5422768	5422829	5432541	5432876	122,99	29,38	51,63	37,48	0.00812651	0.678,0.566	0.408,0.396	0.22	NA
ENSG00000129315.9	CCNT1	chr12	-	48695998	48696162	48695758	48695829	48698137	48698183	86108	9,7	111,62	1,1	0.00465272	0.827,0.885	0.982,0.969	-0.12	NA
ENSG00000129317.14	PUS7L	chr12	-	43738309	43738391	43736380	43736661	43742456	43742555	66,72	0,1	34,10	4,4	0.0010811	1.0,0.973	0.81,0.556	0.303	-0.233
ENSG00000129422.14	MTUS1	chr8	-	17675185	17675252	17656025	17656065	17684327	17684542	203225	0,9	160,86	18,24	4.21041e-06	1.0,0.93	0.825,0.656	0.225	NA
ENSG00000129518.8	EAPP	chr14	-	34529357	34529475	34524696	34524807	34533443	34533539	265304	14,15	166,98	31,68	0.00016605	0.904,0.91	0.728,0.419	0.334	NA
ENSG00000129667.12	RHBDF2	chr17	-	76479732	76479941	76479081	76479277	76481374	76481545	18,23	0,1	10,4	1,3	0.0495398	1.0,0.92	0.833,0.4	0.343	NA
ENSG00000129680.15	MAP7D3	chrX	-	136220764	136220963	136219592	136219671	136222392	136222486	100103	0,2	81,62	3,11	0.00257427	1.0,0.963	0.931,0.738	0.147	NA
ENSG00000129696.12	TTI2	chr8	-	33507228	33507321	33503747	33503935	33509745	33509932	29,21	0,0	25,15	6,10	1.42095e-05	1.0,1.0	0.676,0.429	0.448	NA
ENSG00000130158.13	DOCK6	chr19	-	11229297	11229390	11229000	11229035	11233202	11233366	58,41	39,60	14,15	50,31	0.0276066	0.426,0.255	0.123,0.195	0.182	-0.741
ENSG00000130177.14	CDC16	chr13	+	114261886	114261948	114259334	114259398	114262878	114263014	139156	9,23	84,56	26,43	0.0011345	0.895,0.789	0.641,0.418	0.313	-0.21
ENSG00000130227.16	XPO7	chr8	+	21971875	21971968	21970143	21970310	21974669	21974705	70113	0,1	102,78	4,9	0.00280747	1.0,0.983	0.927,0.813	0.122	NA
ENSG00000130304.16	SLC27A1	chr19	+	17483881	17484121	17470488	17470707	17486562	17486957	2,7	13,12	0,0	12,13	0.00591525	0.071,0.226	0.0,0.0	0.148	NA
ENSG00000130517.13	PGPEP1	chr19	+	18342858	18342911	18340613	18340715	18355894	18356011	60,89	1,0	42,35	0,8	0.0173901	0.973,1.0	1.0,0.721	0.126	NA
ENSG00000130669.17	PAK4	chr19	+	39172917	39173106	39169531	39169757	39173575	39174010	166170	26,42	279331	29,17	0.0026287	0.761,0.669	0.828,0.907	-0.152	NA
ENSG00000130669.17	PAK4	chr19	+	39172917	39173376	39169531	39169757	39173575	39174010	222244	26,42	400474	29,17	0.000429543	0.81,0.744	0.873,0.933	-0.126	NA
ENSG00000130714.15	POMT1	chr9	+	131506113	131506220	131504188	131504340	131506402	131506453	215223	42,43	148,98	13,7	0.0165706	0.719,0.722	0.851,0.875	-0.143	NA
ENSG00000130731.15	C16orf13	chr16	-	634888	635063	634718	634797	635280	635340	342508	68,66	587747	54,58	0.0093802	0.715,0.794	0.845,0.866	-0.101	NA
ENSG00000130734.9	ATG4D	chr19	+	10546838	10547115	10544956	10545130	10548903	10549034	70,73	5,9	84110	2,2	0.0314034	0.875,0.802	0.955,0.965	-0.121	NA
ENSG00000130844.16	ZNF331	chr19	+	53555844	53555908	53539215	53539282	53569303	53569385	27,46	0,0	45,38	5,2	0.0175407	1.0,1.0	0.83,0.912	0.129	NA
ENSG00000130940.14	CASZ1	chr1	-	10693873	10693912	10665082	10665571	10705491	10705544	17,17	1,2	14,12	4,10	0.0468513	0.919,0.849	0.699,0.443	0.313	NA
ENSG00000131051.21	RBM39	chr20	-	35740524	35740597	35738967	35739017	35740823	35740887	224244	73,97	150110	182334	4.04324e-11	0.61,0.562	0.296,0.144	0.366	NA
ENSG00000131115.15	ZNF227	chr19	+	44229732	44229816	44228445	44228572	44234701	44237268	53,68	0,0	45,40	3,9	0.000212892	1.0,1.0	0.882,0.69	0.214	NA
ENSG00000131115.15	ZNF227	chr19	+	44217790	44217852	44213089	44213244	44228445	44228572	46,37	14,17	9,4	8,17	0.0184578	0.644,0.546	0.383,0.115	0.346	NA
ENSG00000131323.14	TRAF3	chr14	+	102886188	102886269	102876357	102876525	102897260	102897307	24,15	0,0	11,3	1,3	0.0293906	1.0,1.0	0.846,0.333	0.41	NA
ENSG00000131375.9	CAPN7	chr3	+	15241452	15241588	15240753	15240853	15242177	15242253	95,88	26,71	61,29	96,76	0.00415197	0.646,0.383	0.241,0.16	0.314	-0.44
ENSG00000131375.9	CAPN7	chr3	+	15245525	15245671	15242177	15242253	15246731	15246794	145131	23,34	93,22	54,54	0.00108449	0.759,0.658	0.463,0.169	0.393	-0.303
ENSG00000131375.9	CAPN7	chr3	+	15210801	15210922	15206151	15206597	15212103	15212212	28,27	70,89	17,3	115,86	0.000574221	0.167,0.132	0.069,0.017	0.107	NA
ENSG00000131389.16	SLC6A6	chr3	+	14468087	14468212	14467852	14467956	14472204	14472317	118200	19,18	300170	11,6	0.00559654	0.756,0.847	0.932,0.934	-0.132	NA
ENSG00000131437.15	KIF3A	chr5	-	132700215	132700284	132699170	132699295	132700646	132700700	17,24	1,0	32,13	3,4	0.0288641	0.899,1.0	0.848,0.63	0.211	NA
ENSG00000131437.15	KIF3A	chr5	-	132710958	132711057	132703462	132703619	132715756	132715931	16,20	0,0	13,8	2,9	0.000183429	1.0,1.0	0.765,0.308	0.464	NA
ENSG00000131503.20	ANKHD1	chr5	+	140472238	140472295	140464666	140464776	140482579	140482667	161184	34,54	197229	28,27	0.0298468	0.731,0.661	0.801,0.829	-0.119	NA
ENSG00000131778.17	CHD1L	chr1	+	147270931	147271005	147268781	147268878	147272170	147272281	94118	23,34	149,92	69,67	0.0222177	0.674,0.638	0.523,0.41	0.19	NA
ENSG00000132334.16	PTPRE	chr10	+	128056122	128056213	128049529	128049666	128060938	128061015	34,32	0,0	48,21	0,6	0.0368246	1.0,1.0	1.0,0.636	0.182	NA
ENSG00000132424.14	PNISR	chr6	-	99403828	99403882	99402539	99402710	99404602	99404702	154128	14,31	119,94	46,41	0.013915	0.866,0.708	0.603,0.573	0.199	-0.61
ENSG00000132466.17	ANKRD17	chr4	-	73139530	73140283	73135116	73135265	73141740	73141843	67,82	31,43	103114	22,22	0.00574783	0.519,0.488	0.701,0.722	-0.208	NA
ENSG00000132485.12	ZRANB2	chr1	-	71076794	71076877	71072471	71072548	71078456	71078565	298422	1,2	208,94	1,16	0.000611147	0.993,0.991	0.99,0.746	0.124	NA
ENSG00000132549.18	VPS13B	chr8	+	99507136	99507203	99502835	99502950	99511103	99511512	42,50	2,3	20,9	8,5	0.0027094	0.918,0.899	0.571,0.489	0.379	NA
ENSG00000132549.18	VPS13B	chr8	+	99507136	99507203	99502835	99502950	99507769	99507911	30,33	6,12	16,4	27,8	0.000341416	0.727,0.594	0.24,0.21	0.435	NA
ENSG00000132591.11	ERAL1	chr17	+	28858145	28858207	28856504	28856582	28858373	28858486	53,61	0,0	48,33	2,6	0.00413159	1.0,1.0	0.93,0.752	0.159	NA
ENSG00000132623.15	ANKEF1	chr20	+	10035578	10035642	10035040	10035333	10038257	10038647	23,21	56,60	6,0	54,27	0.000852511	0.182,0.16	0.057,0.0	0.142	NA
ENSG00000132716.18	DCAF8	chr1	-	160225061	160225119	160224441	160224549	160225590	160225663	105122	16,17	70,44	19,24	0.0470895	0.789,0.803	0.677,0.51	0.203	-0.238
ENSG00000132716.18	DCAF8	chr1	-	160220458	160220691	160218848	160218968	160222650	160222781	0,2	25,30	8,1	11,20	0.0332803	0.0,0.032	0.267,0.024	-0.13	0.237
ENSG00000132749.10	MTL5	chr11	-	68744990	68745111	68742317	68742394	68747207	68747366	48,63	7,10	32,25	1,0	0.00285128	0.774,0.759	0.941,1.0	-0.204	NA
ENSG00000132780.16	NASP	chr1	+	45600384	45600457	45594693	45594773	45602254	45602365	2,7	5,9	1,0	6,1	0.0380131	0.169,0.284	0.078,0.0	0.187	NA
ENSG00000132781.17	MUTYH	chr1	-	45333096	45333170	45332917	45332959	45333284	45333324	28,35	0,1	7,8	3,2	0.00737323	1.0,0.947	0.542,0.67	0.367	NA
ENSG00000132849.19	INADL	chr1	+	62153357	62153481	62148283	62148390	62160907	62161389	38,35	65,85	6,3	33,20	0.0306529	0.226,0.171	0.083,0.07	0.122	NA
ENSG00000133256.12	PDE6B	chr4	+	667855	667941	666530	666614	670045	670314	7,22	4,2	9,3	0,0	0.00452144	0.467,0.846	1.0,1.0	-0.344	NA
ENSG00000133256.12	PDE6B	chr4	+	667855	668006	666530	666614	670045	670233	16,35	4,2	12,2	0,0	0.0115685	0.667,0.897	1.0,1.0	-0.218	NA
ENSG00000133315.10	MACROD1	chr11	-	63998837	63998872	63998559	63998687	63998954	63999222	127156	37,29	200170	24,12	0.0101234	0.703,0.787	0.851,0.907	-0.134	NA
ENSG00000133657.14	ATP13A3	chr3	-	194419878	194419967	194413758	194413839	194425341	194425529	115115	6,7	112,74	13,37	0.0237025	0.906,0.891	0.812,0.5	0.243	NA
ENSG00000133706.17	LARS	chr5	-	146131018	146131109	146130017	146130158	146132897	146133081	252281	3,6	177100	7,27	0.00155655	0.977,0.959	0.927,0.649	0.18	NA
ENSG00000133812.14	SBF2	chr11	-	9829355	9829496	9816839	9817024	9839497	9839603	17,22	0,0	21,17	3,2	0.0269811	1.0,1.0	0.778,0.81	0.206	NA
ENSG00000133961.19	NUMB	chr14	-	73279280	73279424	73275209	73277293	73282358	73282505	164187	27,48	127,49	52,73	0.0200897	0.752,0.661	0.55,0.251	0.306	-0.349
ENSG00000134056.11	MRPS36	chr5	+	69226337	69226401	69217759	69217871	69228199	69228387	139136	2,0	110,81	1,13	0.00485717	0.974,1.0	0.984,0.772	0.109	NA
ENSG00000134058.10	CDK7	chr5	+	69252417	69252451	69235393	69235453	69258042	69258153	92,94	4,10	84,47	17,55	0.010351	0.941,0.867	0.774,0.372	0.331	-0.234
ENSG00000134109.10	EDEM1	chr3	+	5210174	5210248	5208092	5208263	5211119	5211406	98,97	16,24	92,38	47,45	0.00235805	0.756,0.672	0.498,0.3	0.315	-0.289
ENSG00000134138.19	MEIS2	chr15	-	36950323	36950400	36896627	36896686	37036813	37036959	91,95	4,6	44,24	12,7	0.00284409	0.919,0.888	0.647,0.632	0.264	NA
ENSG00000134278.14	SPIRE1	chr18	-	12459754	12459928	12454345	12454483	12463350	12463493	75,85	29,30	112,63	18,6	0.00996576	0.564,0.586	0.757,0.84	-0.224	NA
ENSG00000134283.17	PPHLN1	chr12	+	42351884	42352049	42335882	42335974	42355160	42355222	52,67	50,48	61,54	11,10	7.76903e-06	0.342,0.411	0.735,0.73	-0.356	NA
ENSG00000134283.17	PPHLN1	chr12	+	42374637	42374733	42355160	42355222	42374862	42374942	8,15	51,64	19,19	43,14	0.0260933	0.073,0.105	0.181,0.404	-0.203	NA
ENSG00000134644.15	PUM1	chr1	-	30964673	30964910	30953713	30953981	30965981	30966278	133185	14,12	180143	6,1	0.0121236	0.826,0.885	0.938,0.986	-0.107	NA
ENSG00000134759.13	ELP2	chr18	+	36138794	36138872	36138269	36138426	36142825	36142947	288380	4,0	262173	16,48	1.09543e-08	0.973,1.0	0.891,0.643	0.219	-0.107
ENSG00000134759.13	ELP2	chr18	+	36139418	36139613	36138794	36138872	36142825	36142966	12,26	1,0	25,30	6,2	0.0352384	0.857,1.0	0.676,0.882	0.149	NA
ENSG00000134759.13	ELP2	chr18	+	36142280	36142347	36138269	36138426	36142825	36142966	372500	4,0	329228	16,48	2.74533e-10	0.98,1.0	0.916,0.716	0.174	NA
ENSG00000134759.13	ELP2	chr18	+	36141136	36141201	36139418	36139613	36142825	36142947	19,24	0,0	33,16	1,6	0.00850254	1.0,1.0	0.947,0.59	0.232	NA
ENSG00000134759.13	ELP2	chr18	+	36167152	36167222	36164474	36164667	36171046	36171160	5,16	0,0	13,4	1,4	0.00796807	1.0,1.0	0.871,0.342	0.393	NA
ENSG00000134759.13	ELP2	chr18	+	36141136	36141201	36138269	36138426	36142825	36142947	16,16	4,0	22,19	16,48	0.00284409	0.683,1.0	0.426,0.176	0.54	NA
ENSG00000134851.12	TMEM165	chr4	+	55417802	55417985	55395962	55396396	55424537	55424643	243240	6,6	280176	11,31	0.011535	0.953,0.952	0.927,0.739	0.119	NA
ENSG00000134852.14	CLOCK	chr4	-	55453676	55453824	55453053	55453129	55455896	55456003	46,68	0,0	57,26	3,5	0.00337524	1.0,1.0	0.905,0.722	0.186	NA
ENSG00000134864.10	GGACT	chr13	-	100533562	100533774	100530182	100532601	100583824	100583997	4,5	13,12	0,0	6,3	0.0132626	0.133,0.172	0.0,0.0	0.152	NA
ENSG00000135040.15	NAA35	chr9	+	86013045	86013144	86009864	86009931	86013718	86013897	112129	2,5	76,15	10,12	0.00303082	0.966,0.928	0.792,0.385	0.359	NA
ENSG00000135049.15	AGTPBP1	chr9	-	85678334	85678398	85677435	85677582	85681267	85681335	36,39	4,4	21,13	7,18	0.0156128	0.83,0.841	0.62,0.282	0.384	-0.159
ENSG00000135127.11	CCDC64	chr12	+	120072510	120072729	120071621	120071801	120080886	120081017	27,27	3,4	22,10	0,0	0.00932103	0.818,0.771	1.0,1.0	-0.206	NA
ENSG00000135164.18	DMTF1	chr7	+	87163238	87163332	87152425	87152555	87163494	87163617	31,31	25,41	10,10	24,37	0.0234273	0.383,0.274	0.172,0.119	0.183	NA
ENSG00000135317.12	SNX14	chr6	-	85536791	85536924	85533598	85533800	85543181	85543306	205200	0,1	211138	8,14	2.73168e-05	1.0,0.99	0.93,0.831	0.114	NA
ENSG00000135365.15	PHF21A	chr11	-	46090454	46090581	46084165	46084302	46092182	46092223	47,33	25,60	26,5	76,83	0.00209774	0.485,0.216	0.146,0.029	0.263	NA
ENSG00000135446.16	CDK4	chr12	-	57750441	57750563	57749453	57749504	57750922	57751090	0,0	5,5	1,5	4,2	0.0102178	0.0,0.0	0.111,0.556	-0.334	NA
ENSG00000135451.12	TROAP	chr12	+	49329856	49329991	49329394	49329454	49330144	49330573	81,94	1,1	94,86	8,7	0.00485848	0.976,0.979	0.855,0.86	0.12	NA
ENSG00000135506.15	OS9	chr12	+	57720098	57720263	57718992	57719182	57720405	57720518	7791103	510557	10611006	321200	1.01344e-06	0.433,0.498	0.623,0.716	-0.204	NA
ENSG00000135541.20	AHI1	chr6	-	135301407	135301539	135300499	135300558	135302711	135302817	14,12	5,3	15,15	0,0	0.000431597	0.583,0.667	1.0,1.0	-0.375	NA
ENSG00000135549.14	PKIB	chr6	+	122675077	122675144	122633282	122633367	122717786	122717963	28,61	0,1	49,40	5,14	0.000262303	1.0,0.97	0.839,0.603	0.264	NA
ENSG00000135597.18	REPS1	chr6	-	138917554	138917624	138915857	138915976	138920214	138920316	112112	8,10	42,20	8,18	0.0316497	0.879,0.854	0.732,0.367	0.317	-0.205
ENSG00000135597.18	REPS1	chr6	-	138917554	138917627	138915857	138915976	138920214	138920316	155160	8,10	63,29	8,18	0.0295172	0.908,0.891	0.801,0.451	0.273	-0.173
ENSG00000135597.18	REPS1	chr6	-	138944497	138944622	138941334	138941489	138945218	138945260	64,95	0,1	84,73	4,7	0.00633828	1.0,0.979	0.913,0.839	0.114	NA
ENSG00000135597.18	REPS1	chr6	-	138943852	138944015	138941334	138941489	138944497	138944622	67104	0,0	81,68	2,16	0.00024104	1.0,1.0	0.953,0.68	0.183	NA
ENSG00000135597.18	REPS1	chr6	-	138943512	138943576	138941334	138941489	138943852	138944015	103138	5,3	62,31	10,17	0.000372216	0.918,0.962	0.771,0.498	0.305	NA
ENSG00000135655.13	USP15	chr12	+	62374389	62374535	62355427	62355475	62381489	62381663	11,28	57,80	27,53	54,40	0.0231314	0.088,0.149	0.2,0.398	-0.181	NA
ENSG00000135679.21	MDM2	chr12	+	68820324	68820374	68809226	68809292	68824362	68824430	158210	3,2	221142	8,31	0.000372097	0.97,0.984	0.944,0.735	0.138	NA
ENSG00000135679.21	MDM2	chr12	+	68813553	68813628	68809207	68809292	68824362	68824430	84113	3,2	102137	8,31	0.00172719	0.934,0.966	0.865,0.69	0.172	NA
ENSG00000135766.8	EGLN1	chr1	-	231367568	231367636	231363750	231366475	231370561	231370698	208232	13,14	187125	27,53	0.00217232	0.894,0.897	0.785,0.555	0.225	NA
ENSG00000135837.15	CEP350	chr1	+	179990506	179990621	179987242	179987286	179992061	179992221	86,67	3,6	61,14	22,38	0.000156914	0.935,0.848	0.581,0.156	0.523	-0.133
ENSG00000135837.15	CEP350	chr1	+	180003173	180003287	179996552	179997175	180006453	180006567	47,73	0,0	77,35	4,5	0.00368732	1.0,1.0	0.906,0.778	0.158	NA
ENSG00000135837.15	CEP350	chr1	+	180006453	180006567	179996552	179997175	180011928	180012075	28,32	2,0	34,26	7,9	0.00367926	0.875,1.0	0.708,0.591	0.288	NA
ENSG00000135837.15	CEP350	chr1	+	180003173	180003287	179996552	179997175	180011928	180012075	26,44	2,0	38,18	7,9	0.0019896	0.867,1.0	0.731,0.5	0.318	NA
ENSG00000135913.10	USP37	chr2	-	218534608	218534706	218529955	218530040	218546220	218546298	74114	3,3	98100	15,25	0.0001506	0.925,0.95	0.766,0.667	0.221	NA
ENSG00000135931.17	ARMC9	chr2	+	231288659	231288721	231282058	231282133	231291352	231291443	5,1	9,3	0,0	4,1	0.0216425	0.235,0.155	0.0,0.0	0.195	NA
ENSG00000135953.10	MFSD9	chr2	-	102732023	102732138	102731024	102731068	102732321	102732409	39,41	32,22	9,5	41,37	8.23386e-08	0.379,0.482	0.099,0.063	0.349	NA
ENSG00000135968.19	GCC2	chr2	+	108472826	108472899	108468979	108469084	108475534	108475635	59,74	0,0	57,28	1,5	0.0326756	1.0,1.0	0.967,0.741	0.146	NA
ENSG00000136048.13	DRAM1	chr12	+	101920108	101920201	101914173	101914232	101921215	101921542	35,48	0,1	28,11	2,4	0.012708	1.0,0.96	0.875,0.579	0.253	-0.157
ENSG00000136051.13	KIAA1033	chr12	+	105156725	105156792	105152342	105152451	105157235	105157322	156160	0,1	126,57	6,8	0.000240963	1.0,0.988	0.918,0.791	0.139	-0.147
ENSG00000136108.14	CKAP2	chr13	+	52468277	52468347	52465294	52465465	52473828	52474084	318323	1,0	276110	5,22	5.81235e-06	0.994,1.0	0.966,0.723	0.152	NA
ENSG00000136122.15	BORA	chr13	+	72731280	72731387	72728925	72729093	72737961	72738043	14,13	10,17	4,4	31,12	0.00730961	0.412,0.277	0.061,0.143	0.243	-0.414
ENSG00000136122.15	BORA	chr13	+	72734959	72735005	72728925	72729093	72737961	72738043	8,7	10,17	2,1	31,12	0.00605898	0.333,0.205	0.039,0.05	0.225	-0.362
ENSG00000136147.16	PHF11	chr13	+	49506634	49506756	49495960	49496095	49513058	49513166	18,23	2,4	8,4	5,6	0.0298359	0.818,0.742	0.444,0.25	0.433	NA
ENSG00000136238.17	RAC1	chr7	+	6391923	6392041	6387211	6387283	6400125	6400188	63114	0,0	81,96	2,13	0.000444774	1.0,1.0	0.953,0.787	0.13	NA
ENSG00000136238.17	RAC1	chr7	+	6398661	6398718	6391923	6392041	6400125	6400188	661740	63114	289170	81,96	0.000118159	0.857,0.788	0.671,0.503	0.236	NA
ENSG00000136451.8	VEZF1	chr17	-	57981872	57981936	57980602	57980786	57982698	57982864	453437	5,6	301145	14,16	0.000111972	0.98,0.975	0.921,0.831	0.102	NA
ENSG00000136492.8	BRIP1	chr17	-	61693429	61693512	61685835	61686165	61715950	61716063	503393	7,10	245,77	25,6	6.94166e-05	0.973,0.952	0.831,0.865	0.114	NA
ENSG00000136492.8	BRIP1	chr17	-	61715950	61716063	61693429	61693512	61743012	61743134	501420	4,2	283,82	12,9	4.35771e-05	0.984,0.991	0.922,0.82	0.117	NA
ENSG00000136492.8	BRIP1	chr17	-	61849128	61849256	61847100	61847220	61857057	61857231	381341	26,43	203,52	57,99	0.00382952	0.88,0.799	0.64,0.208	0.416	NA
ENSG00000136536.14	MARCH7	chr2	+	159764625	159764674	159762879	159762993	159767283	159767850	165167	17,21	82,11	35,31	0.00141011	0.855,0.829	0.588,0.178	0.459	-0.274
ENSG00000136643.11	RPS6KC1	chr1	+	213129526	213129889	213117316	213117410	213167857	213167973	10,29	3,4	12,7	0,0	0.00357316	0.625,0.784	1.0,1.0	-0.295	NA
ENSG00000136754.16	ABI1	chr10	-	26759061	26759238	26751597	26751783	26765217	26765318	144177	35,52	214215	20,20	0.000157776	0.673,0.63	0.843,0.843	-0.192	0.152
ENSG00000136754.16	ABI1	chr10	-	26759061	26759235	26751597	26751783	26765217	26765318	101131	35,52	131195	20,20	0.000107546	0.591,0.557	0.766,0.83	-0.224	NA
ENSG00000136758.18	YME1L1	chr10	-	27142386	27142485	27136275	27136385	27145427	27145590	437511	22,55	336159	52,45	0.00278048	0.909,0.823	0.764,0.639	0.164	NA
ENSG00000136828.18	RALGPS1	chr9	+	127050042	127050132	127034430	127034514	127052846	127052939	44,48	6,1	32,16	9,9	0.0247329	0.786,0.96	0.64,0.471	0.318	NA
ENSG00000136861.17	CDK5RAP2	chr9	-	120460571	120460747	120458449	120458622	120467859	120467997	41,40	20,19	24,4	27,16	0.0201549	0.506,0.513	0.308,0.111	0.3	-0.313
ENSG00000136861.17	CDK5RAP2	chr9	-	120460571	120460667	120458449	120458622	120467859	120467997	116126	20,19	61,17	27,16	0.00442218	0.744,0.768	0.53,0.347	0.318	NA
ENSG00000136891.13	TEX10	chr9	-	100310298	100310379	100303631	100303842	100320264	100320398	77,89	0,2	84,79	6,6	0.0188379	1.0,0.957	0.875,0.868	0.107	NA
ENSG00000136936.10	XPA	chr9	-	97682199	97682430	97674908	97675587	97684922	97685040	18,26	110,81	32,36	60,33	0.00225588	0.076,0.138	0.211,0.353	-0.175	0.109
ENSG00000136937.12	NCBP1	chr9	+	97651309	97651373	97650502	97650600	97653797	97653908	120112	2,3	95,36	10,13	0.000619557	0.97,0.953	0.838,0.601	0.242	NA
ENSG00000137074.18	APTX	chr9	-	32988082	32988129	32987543	32987731	32989758	32990088	39,42	4,7	13,28	9,18	0.00242897	0.858,0.788	0.472,0.491	0.341	NA
ENSG00000137074.18	APTX	chr9	-	32988082	32988124	32987543	32987731	32989758	32990088	27,34	4,7	13,19	9,18	0.00498493	0.814,0.758	0.483,0.406	0.342	NA
ENSG00000137145.20	DENND4C	chr9	+	19371755	19371820	19369836	19369987	19372036	19373545	120132	1,3	110,70	13,29	8.19161e-06	0.985,0.96	0.82,0.566	0.279	-0.137
ENSG00000137312.14	FLOT1	chr6	-	30741189	30741333	30740678	30740798	30741613	30741704	7671094	42,64	684511	98101	1.03422e-08	0.901,0.895	0.777,0.717	0.151	-0.105
ENSG00000137434.11	C6orf52	chr6	-	10684848	10684923	10683186	10683232	10686965	10687164	9,15	6,5	8,6	0,0	0.000166972	0.43,0.602	1.0,1.0	-0.484	NA
ENSG00000137486.16	ARRB1	chr11	-	75271700	75271724	75268888	75268959	75272894	75272978	4,3	10,14	0,0	8,4	0.0102055	0.234,0.141	0.0,0.0	0.188	NA
ENSG00000137497.17	NUMA1	chr11	-	72049418	72049539	72035901	72035975	72069841	72069911	43,42	47,47	31,12	63,58	0.00941026	0.314,0.309	0.197,0.094	0.166	NA
ENSG00000137501.17	SYTL2	chr11	-	85714412	85714507	85711112	85711232	85718789	85718843	416275	12,23	220,71	21,21	0.0236979	0.945,0.857	0.84,0.628	0.167	-0.104
ENSG00000137501.17	SYTL2	chr11	-	85714412	85714507	85711112	85711232	85720857	85720959	279183	2,2	156,43	5,7	0.00817148	0.986,0.979	0.94,0.754	0.135	NA
ENSG00000137504.13	CREBZF	chr11	-	85661636	85661749	85660334	85660597	85662388	85662457	30,23	9,6	8,2	9,10	0.00426473	0.625,0.657	0.308,0.091	0.442	NA
ENSG00000137513.9	NARS2	chr11	-	78441090	78441117	78435960	78436814	78443660	78443758	88,87	2,3	58,37	7,7	0.0179855	0.97,0.956	0.86,0.797	0.134	NA
ENSG00000137574.10	TGS1	chr8	+	55782747	55782812	55773141	55773719	55785718	55785891	41,60	2,5	23,5	5,8	0.0402336	0.917,0.866	0.713,0.252	0.409	-0.152
ENSG00000137693.13	YAP1	chr11	+	102209516	102209564	102205892	102206086	102223621	102223752	24,25	2,1	15,9	6,3	0.0479754	0.881,0.939	0.606,0.648	0.283	NA
ENSG00000137807.13	KIF23	chr15	+	69440767	69441079	69440307	69440487	69444789	69445041	70111	22,11	205151	10,5	0.00723694	0.614,0.835	0.911,0.938	-0.2	0.422
ENSG00000137807.13	KIF23	chr15	+	69425281	69425323	69423158	69423329	69426069	69426182	56,36	24,22	34,20	56,55	4.72001e-05	0.601,0.514	0.282,0.19	0.322	NA
ENSG00000137822.12	TUBGCP4	chr15	+	43399111	43399174	43398037	43398179	43400043	43400221	7,1	10,12	0,0	7,7	0.0146995	0.277,0.044	0.0,0.0	0.161	NA
ENSG00000137831.14	UACA	chr15	-	70691298	70691363	70690453	70690511	70695016	70695105	74,84	0,3	63,21	9,27	0.000391093	1.0,0.938	0.791,0.296	0.425	NA
ENSG00000138018.17	EPT1	chr2	+	26375039	26375148	26373366	26373629	26383298	26383347	26,27	0,0	18,11	3,5	0.000253504	1.0,1.0	0.75,0.524	0.363	NA
ENSG00000138069.16	RAB1A	chr2	-	65088938	65089070	65087870	65088690	65097970	65098066	388394	10,17	304223	45170	0.000111509	0.951,0.921	0.772,0.396	0.352	-0.107
ENSG00000138069.16	RAB1A	chr2	-	65090982	65091078	65086854	65088690	65097970	65098066	562623	10,17	459272	45170	8.44782e-05	0.966,0.948	0.836,0.444	0.317	NA
ENSG00000138078.15	PREPL	chr2	-	44321826	44321900	44317610	44321445	44322730	44322854	133107	3,10	45,18	9,10	0.00718553	0.957,0.844	0.717,0.477	0.303	-0.107
ENSG00000138078.15	PREPL	chr2	-	44359496	44359750	44346267	44346390	44361523	44361805	9,9	8,13	3,1	21,15	0.00404506	0.36,0.257	0.067,0.032	0.259	NA
ENSG00000138160.5	KIF11	chr10	+	92613039	92613130	92609384	92609509	92613376	92613619	108127	0,0	156,70	1,11	0.00365418	1.0,1.0	0.987,0.761	0.126	NA
ENSG00000138182.14	KIF20B	chr10	+	89714046	89714083	89710960	89711145	89714954	89715182	21,24	0,1	27,21	1,11	0.0143512	1.0,0.942	0.948,0.563	0.216	NA
ENSG00000138231.12	DBR1	chr3	-	138163777	138163858	138163348	138163494	138167080	138167305	54,54	0,3	40,5	11,23	0.000123933	1.0,0.9	0.645,0.098	0.579	-0.264
ENSG00000138382.13	METTL5	chr2	-	169815476	169815528	169812456	169812506	169819560	169819643	261373	21,29	176,92	57,94	1.01946e-05	0.881,0.884	0.648,0.368	0.375	-0.345
ENSG00000138434.16	SSFA2	chr2	+	181896029	181896079	181892614	181892660	181896907	181896964	237280	4,3	251151	8,25	0.000476816	0.973,0.983	0.95,0.785	0.111	NA
ENSG00000138592.13	USP8	chr15	+	50484274	50484361	50481480	50482065	50489800	50489881	193147	189293	39,14	233148	5.53013e-10	0.338,0.201	0.077,0.045	0.209	-0.203
ENSG00000138593.8	SECISBP2L	chr15	-	49019417	49019552	49017547	49017628	49027364	49027480	48,37	22,33	29,3	33,31	0.0361744	0.522,0.359	0.305,0.046	0.265	NA
ENSG00000138600.9	SPPL2A	chr15	-	50730964	50731039	50725915	50726377	50736100	50736202	207215	3,4	169109	4,17	0.018373	0.972,0.964	0.955,0.763	0.109	NA
ENSG00000138600.9	SPPL2A	chr15	-	50726072	50726126	50725220	50725323	50726320	50726377	129,84	96114	75,24	111111	0.0389047	0.441,0.302	0.284,0.112	0.174	NA
ENSG00000138640.14	FAM13A	chr4	-	88737471	88737555	88732001	88732198	88739029	88739125	77114	1,3	124,77	8,12	0.0154369	0.975,0.95	0.886,0.762	0.138	NA
ENSG00000138640.14	FAM13A	chr4	-	88805010	88805052	88790585	88790627	88822975	88823361	54,68	12,19	48,23	34,37	0.00151708	0.744,0.698	0.477,0.287	0.339	NA
ENSG00000138668.18	HNRNPD	chr4	-	82354894	82355001	82353833	82354154	82355303	82355401	121165	222170	159240	118105	0.00389435	0.214,0.327	0.403,0.533	-0.198	NA
ENSG00000138668.18	HNRNPD	chr4	-	82356536	82356683	82355248	82355401	82356795	82356895	382397	174186	358420	106,97	0.00302079	0.523,0.516	0.628,0.684	-0.136	NA
ENSG00000138668.18	HNRNPD	chr4	-	82371527	82371584	82359470	82359639	82373445	82373956	173128	11,11	84,41	15,34	0.0127776	0.9,0.869	0.762,0.408	0.3	NA
ENSG00000138674.16	SEC31A	chr4	-	82862533	82862572	82857688	82857764	82863317	82863392	45,59	157209	17,10	174152	2.0358e-05	0.16,0.158	0.061,0.042	0.107	-0.256
ENSG00000138674.16	SEC31A	chr4	-	82862533	82862572	82861630	82861708	82863317	82863392	128159	21,19	91,36	32,22	0.0027419	0.802,0.847	0.654,0.521	0.237	-0.235
ENSG00000138750.14	NUP54	chr4	-	76131229	76131284	76130655	76130749	76132522	76132719	121135	2,0	89,58	4,16	0.000135964	0.972,1.0	0.928,0.678	0.183	NA
ENSG00000138778.11	CENPE	chr4	-	103153046	103153250	103151218	103151377	103158299	103158458	37,52	2,5	81,44	0,0	0.011806	0.902,0.839	1.0,1.0	-0.129	NA
ENSG00000138834.12	MAPK8IP3	chr16	+	1758147	1758159	1748601	1748720	1759957	1760015	85101	7,12	99,78	26,26	0.00716252	0.914,0.88	0.769,0.723	0.151	NA
ENSG00000138942.15	RNF185	chr22	+	31182968	31183066	31160242	31160303	31187046	31187270	4,11	23,15	2,0	16,16	0.0219609	0.08,0.268	0.059,0.0	0.145	NA
ENSG00000139132.14	FGD4	chr12	+	32576265	32576449	32564136	32564289	32581959	32582467	16,11	0,1	19,18	1,7	0.0403776	1.0,0.846	0.905,0.563	0.189	NA
ENSG00000139173.9	TMEM117	chr12	+	44143524	44143624	43944209	43944342	44211289	44211387	18,8	6,4	2,0	2,4	0.0250128	0.6,0.5	0.333,0.0	0.384	NA
ENSG00000139211.6	AMIGO2	chr12	-	47079141	47079248	47076497	47079065	47079461	47079642	606564	304272	473159	492267	8.02207e-08	0.499,0.509	0.325,0.229	0.227	0.113
ENSG00000139211.6	AMIGO2	chr12	-	47079146	47079248	47076599	47079065	47079461	47079951	446390	304272	321104	492267	1.63516e-09	0.423,0.418	0.246,0.163	0.216	0.129
ENSG00000139323.13	POC1B	chr12	-	89425160	89425379	89419717	89421257	89459637	89459718	137193	15,15	196152	4,1	0.000263393	0.82,0.865	0.961,0.987	-0.131	0.22
ENSG00000139546.10	TARBP2	chr12	+	53505134	53505262	53504697	53504815	53505648	53505850	51,52	14,20	49,50	6,2	0.0100616	0.646,0.565	0.803,0.926	-0.259	NA
ENSG00000139618.14	BRCA2	chr13	+	32375342	32375406	32370970	32371100	32376669	32376791	7,5	8,9	1,0	6,4	0.0121199	0.322,0.232	0.083,0.0	0.236	NA
ENSG00000139620.12	KANSL2	chr12	-	48679035	48679238	48671798	48671962	48679654	48679833	63,64	10,16	49,81	5,1	0.0161255	0.759,0.667	0.831,0.976	-0.19	NA
ENSG00000139620.12	KANSL2	chr12	-	48679035	48679150	48671798	48671962	48679654	48679833	116119	10,16	108158	5,1	0.00288125	0.853,0.788	0.915,0.987	-0.131	NA
ENSG00000139629.15	GALNT6	chr12	-	51390849	51390937	51383491	51383582	51391600	51391629	15,15	2,3	13,4	0,0	0.0224146	0.789,0.714	1.0,1.0	-0.248	NA
ENSG00000139974.15	SLC38A6	chr14	+	61043449	61043503	61043146	61043212	61045345	61045425	53,65	0,0	49,23	2,4	0.0305554	1.0,1.0	0.935,0.771	0.147	NA
ENSG00000140105.17	WARS	chr14	-	100374135	100374220	100369086	100369258	100375282	100375344	6,4	13,9	0,0	3,2	0.0118101	0.188,0.182	0.0,0.0	0.185	NA
ENSG00000140105.17	WARS	chr14	-	100374135	100374244	100369086	100369258	100375282	100375406	6,5	13,9	0,0	3,2	0.00941904	0.188,0.217	0.0,0.0	0.203	NA
ENSG00000140199.11	SLC12A6	chr15	-	34275344	34275389	34260925	34261020	34336409	34336601	5,12	0,5	17,12	0,0	0.0297751	1.0,0.602	1.0,1.0	-0.199	NA
ENSG00000140307.10	GTF2A2	chr15	-	59652205	59652326	59642135	59642262	59657405	59657538	34,33	0,1	32,34	3,4	0.0339363	1.0,0.943	0.842,0.81	0.145	NA
ENSG00000140367.11	UBE2Q2	chr15	+	75879097	75879188	75873427	75873568	75883365	75883424	77,61	0,4	40,37	4,10	0.0161278	1.0,0.884	0.833,0.649	0.201	NA
ENSG00000140396.12	NCOA2	chr8	-	70144641	70144848	70141183	70141399	70148272	70148483	43,57	6,15	34,11	17,19	0.0312658	0.782,0.655	0.5,0.224	0.357	NA
ENSG00000140463.13	BBS4	chr15	+	72715290	72715402	72712243	72712307	72716777	72716851	42,69	4,4	66,43	0,0	0.0115133	0.84,0.896	1.0,1.0	-0.132	-0.215
ENSG00000140521.11	POLG	chr15	-	89317938	89318037	89317375	89317536	89318540	89318749	22,22	19,28	12,14	43,33	0.034937	0.367,0.282	0.122,0.175	0.176	NA
ENSG00000140750.16	ARHGAP17	chr16	-	24939363	24939597	24935469	24935639	24941986	24942143	29,31	19,31	11,3	23,26	0.00423478	0.433,0.333	0.193,0.055	0.259	0.376
ENSG00000140859.15	KIFC3	chr16	-	57760281	57760416	57759752	57759836	57760725	57760955	13,18	0,0	26,14	1,4	0.0297751	1.0,1.0	0.929,0.636	0.218	NA
ENSG00000140987.19	ZSCAN32	chr16	-	3390009	3390183	3384497	3384941	3393648	3393814	18,16	1,0	4,1	1,2	0.0469958	0.9,1.0	0.667,0.2	0.516	NA
ENSG00000141013.14	GAS8	chr16	+	90027635	90027722	90019642	90019768	90031175	90031496	55,61	0,1	25,22	4,4	0.00171112	1.0,0.968	0.758,0.733	0.238	NA
ENSG00000141076.17	CIRH1A	chr16	+	69154392	69154457	69153583	69153680	69155870	69155993	138195	0,3	97,41	2,6	0.0486714	1.0,0.972	0.963,0.787	0.111	NA
ENSG00000141084.10	RANBP10	chr16	-	67772033	67772086	67744264	67744455	67805427	67805539	65,70	1,2	45,37	6,9	0.00242451	0.975,0.954	0.816,0.708	0.202	NA
ENSG00000141127.14	PRPSAP2	chr17	+	18923913	18923984	18911102	18911251	18928810	18928957	174205	3,4	198161	8,23	0.00435652	0.968,0.964	0.928,0.784	0.11	NA
ENSG00000141376.20	BCAS3	chr17	+	61354361	61354502	61084466	61084564	61368326	61368494	150274	40,44	355487	28,19	7.85965e-06	0.652,0.757	0.864,0.928	-0.192	NA
ENSG00000141376.20	BCAS3	chr17	+	61380505	61380571	61353587	61354502	61391976	61392831	203216	3,7	88,29	17,69	0.00010232	0.973,0.943	0.735,0.184	0.498	NA
ENSG00000141424.12	SLC39A6	chr18	-	36126218	36127016	36124519	36124700	36129113	36129318	13991496	32,67	19781669	175309	8.21049e-10	0.956,0.918	0.85,0.73	0.147	NA
ENSG00000141504.11	SAT2	chr17	-	7626706	7626793	7626341	7626614	7627552	7627802	5,12	1,3	12,23	0,0	0.0159623	0.714,0.667	1.0,1.0	-0.309	NA
ENSG00000141524.15	TMC6	chr17	-	78126776	78126974	78126523	78126648	78128611	78128751	45,68	7,3	87,75	2,0	0.0174584	0.763,0.919	0.956,1.0	-0.137	NA
ENSG00000141524.15	TMC6	chr17	-	78126776	78126906	78126523	78126648	78128611	78128755	58,76	7,3	96,93	2,0	0.0173513	0.806,0.927	0.96,1.0	-0.113	NA
ENSG00000141551.14	CSNK1D	chr17	-	82245975	82246039	82244679	82244831	82248874	82249014	312324	15,14	297193	21,34	0.023086	0.919,0.926	0.885,0.755	0.103	NA
ENSG00000141564.13	RPTOR	chr17	+	80925369	80925480	80923489	80923673	80940495	80940601	24,43	2,0	26,9	4,4	0.0221062	0.857,1.0	0.765,0.529	0.281	NA
ENSG00000141580.15	WDR45B	chr17	-	82625388	82625483	82621608	82621799	82643948	82644023	430523	4,5	875928	29106	8.80903e-08	0.982,0.981	0.938,0.814	0.106	NA
ENSG00000141580.15	WDR45B	chr17	-	82630920	82631022	82621608	82621799	82643948	82644023	203288	4,5	469449	29106	2.73168e-05	0.962,0.966	0.89,0.679	0.179	NA
ENSG00000141699.10	FAM134C	chr17	-	42587833	42587864	42586764	42586891	42592055	42592162	30,47	6,4	24,12	14,12	0.00303017	0.781,0.894	0.55,0.417	0.354	NA
ENSG00000141736.13	ERBB2	chr17	+	39719786	39719834	39717319	39717480	39723318	39723457	89,90	5,11	104,68	28,40	0.00102203	0.916,0.834	0.695,0.511	0.272	-0.327
ENSG00000141959.16	PFKL	chr21	+	44311005	44311083	44306680	44306754	44312104	44312294	546574	10,18	196148	15,31	1.8408e-05	0.965,0.941	0.867,0.705	0.167	-0.113
ENSG00000142396.10	ERVK3-1	chr19	+	58312196	58312462	58306087	58306216	58314747	58315202	104107	0,2	84,51	6,10	0.000306461	1.0,0.964	0.875,0.718	0.185	NA
ENSG00000142396.10	ERVK3-1	chr19	+	58312027	58312462	58306087	58306216	58314747	58314781	97,99	0,2	79,48	6,10	0.000342429	1.0,0.961	0.868,0.706	0.194	NA
ENSG00000142675.17	CNKSR1	chr1	+	26187167	26187241	26185013	26185186	26187410	26187482	39,31	4,2	22,15	0,0	0.0411602	0.832,0.887	1.0,1.0	-0.141	NA
ENSG00000142949.16	PTPRF	chr1	+	43602070	43602097	43598838	43598913	43603415	43603533	265240	365566	87,19	397184	3.48521e-07	0.35,0.239	0.14,0.071	0.189	-0.148
ENSG00000143033.17	MTF2	chr1	+	93120548	93120672	93119332	93119401	93133702	93133740	13,28	0,0	13,2	0,13	0.0271419	1.0,1.0	1.0,0.071	0.465	-0.269
ENSG00000143033.17	MTF2	chr1	+	93129277	93129448	93119332	93119401	93133702	93133808	30,46	0,0	42,53	0,13	0.00562493	1.0,1.0	1.0,0.671	0.164	NA
ENSG00000143033.17	MTF2	chr1	+	93127231	93127299	93120792	93120894	93129277	93129448	18,16	0,0	17,6	2,3	0.00841437	1.0,1.0	0.818,0.514	0.334	NA
ENSG00000143164.15	DCAF6	chr1	+	168022987	168023047	168004532	168004793	168043024	168043140	20,39	9,20	17,6	22,25	0.00613798	0.554,0.522	0.302,0.118	0.328	NA
ENSG00000143164.15	DCAF6	chr1	+	168038370	168038488	168004532	168004793	168043024	168043140	147155	9,20	65,27	22,25	0.000526552	0.891,0.795	0.596,0.351	0.369	NA
ENSG00000143217.8	PVRL4	chr1	-	161073224	161073299	161070994	161072885	161073719	161073795	155251	42,98	260201	170287	0.00127914	0.65,0.563	0.435,0.261	0.259	NA
ENSG00000143341.11	HMCN1	chr1	+	186117458	186117623	186116993	186117115	186119190	186119298	133127	10,9	49,23	13,13	0.00162916	0.869,0.876	0.653,0.469	0.312	-0.202
ENSG00000143367.15	TUFT1	chr1	+	151562090	151562165	151540304	151540426	151562584	151562686	86,78	36,61	38,10	54,87	0.000204903	0.546,0.392	0.262,0.055	0.31	NA
ENSG00000143374.14	TARS2	chr1	+	150504631	150504733	150504334	150504435	150504905	150504978	60,80	33,68	34,12	50,32	0.0133978	0.476,0.37	0.254,0.158	0.217	NA
ENSG00000143390.17	RFX5	chr1	-	151345927	151345957	151345105	151345188	151346204	151346333	18,5	0,1	5,1	2,2	0.0261049	1.0,0.783	0.643,0.265	0.437	NA
ENSG00000143393.16	PI4KB	chr1	-	151326171	151326373	151315572	151316509	151327270	151327657	133174	19,12	126137	8,0	0.0301575	0.778,0.879	0.887,1.0	-0.115	0.227
ENSG00000143401.14	ANP32E	chr1	-	150223185	150223294	150220377	150220761	150226607	150226730	265280	7,12	375262	24,39	0.00710952	0.95,0.921	0.887,0.771	0.107	NA
ENSG00000143409.15	FAM63A	chr1	-	151002164	151002968	151001724	151001782	151006311	151006797	70,79	7,6	50,36	0,1	0.00952246	0.833,0.868	1.0,0.947	-0.123	0.148
ENSG00000143409.15	FAM63A	chr1	-	151002164	151002323	151001724	151001782	151006311	151006857	78,85	7,6	54,36	0,1	0.0115783	0.848,0.876	1.0,0.947	-0.112	0.149
ENSG00000143409.15	FAM63A	chr1	-	151002164	151002400	151001724	151001782	151006311	151006485	66,72	7,6	48,30	0,1	0.00943155	0.825,0.857	1.0,0.938	-0.128	0.164
ENSG00000143409.15	FAM63A	chr1	-	151002164	151002170	151001724	151001782	151006311	151006871	4,6	7,6	9,1	0,1	0.0125161	0.349,0.484	1.0,0.484	-0.326	0.371
ENSG00000143416.20	SELENBP1	chr1	-	151366274	151366453	151365767	151365846	151366721	151366904	144153	21,21	103,77	27,30	0.0306289	0.774,0.785	0.656,0.562	0.171	-0.226
ENSG00000143420.17	ENSA	chr1	-	150626478	150626526	150625641	150625808	150627311	150627592	22,14	1,3	6,1	3,6	0.0237029	0.931,0.742	0.551,0.093	0.514	NA
ENSG00000143537.13	ADAM15	chr1	+	155061903	155061975	155060762	155060832	155062244	155062369	45,30	75,81	12,8	55,45	0.0337505	0.236,0.16	0.101,0.084	0.106	NA
ENSG00000143553.10	SNAPIN	chr1	+	153659137	153659184	153658653	153658886	153659447	153659566	232182	41,47	125,59	74,46	4.33773e-06	0.778,0.706	0.511,0.443	0.265	-0.288
ENSG00000143624.13	INTS3	chr1	+	153753700	153753818	153751094	153751239	153754641	153754739	11,27	2,4	12,12	0,0	0.0125337	0.733,0.771	1.0,1.0	-0.248	NA
ENSG00000143633.12	C1orf131	chr1	-	231226390	231226492	231225502	231225523	231226738	231226825	1,2	16,14	4,5	7,2	0.0305681	0.03,0.067	0.222,0.556	-0.341	NA
ENSG00000143727.15	ACP1	chr2	+	275139	275201	272036	272150	277226	277375	158211	0,1	210110	5,19	4.35771e-05	1.0,0.991	0.959,0.761	0.136	NA
ENSG00000143776.18	CDC42BPA	chr1	-	227112670	227112913	227112311	227112422	227119803	227119937	24,22	5,4	24,7	1,0	0.0149644	0.706,0.733	0.923,1.0	-0.242	NA
ENSG00000143847.15	PPFIA4	chr1	+	203049675	203049767	203048582	203048714	203051768	203051877	15,9	4,2	9,8	1,0	0.0410516	0.652,0.692	0.818,1.0	-0.237	NA
ENSG00000143847.15	PPFIA4	chr1	+	203056783	203056950	203056374	203056508	203059177	203059271	172205	32,34	204174	12,5	6.61325e-05	0.729,0.751	0.895,0.946	-0.18	NA
ENSG00000143850.12	PLEKHA6	chr1	-	204223461	204223585	204221220	204222779	204228082	204228228	58,74	3,10	32,13	0,0	0.00514416	0.906,0.787	1.0,1.0	-0.153	0.32
ENSG00000144199.11	FAHD2B	chr2	-	97091461	97091712	97089755	97090325	97094700	97094835	8,18	3,11	19,10	2,0	0.00953937	0.571,0.45	0.826,1.0	-0.403	NA
ENSG00000144283.21	PKP4	chr2	+	158676738	158676867	158673882	158674000	158678580	158678654	206261	220224	258166	157,77	0.00584558	0.319,0.368	0.451,0.519	-0.141	NA
ENSG00000144395.17	CCDC150	chr2	+	196672344	196672437	196669832	196669876	196674240	196674348	7,8	4,1	13,7	0,0	0.00349599	0.467,0.8	1.0,1.0	-0.366	NA
ENSG00000144504.15	ANKMY1	chr2	-	240507559	240507691	240500451	240500565	240512801	240512942	5,15	3,3	13,2	1,0	0.0357042	0.455,0.714	0.867,1.0	-0.349	NA
ENSG00000144674.16	GOLGA4	chr3	+	37289234	37289289	37281957	37282272	37294978	37295077	34,45	17,27	31,22	44,82	0.000309543	0.538,0.492	0.291,0.135	0.302	-0.373
ENSG00000144674.16	GOLGA4	chr3	+	37361242	37361305	37355100	37355187	37366079	37366751	115146	33,49	79,32	61,82	0.000494666	0.656,0.62	0.415,0.176	0.343	-0.294
ENSG00000144674.16	GOLGA4	chr3	+	37289234	37289291	37281957	37282272	37294978	37295077	128166	17,27	113,55	44,82	0.00314752	0.812,0.779	0.595,0.277	0.36	-0.27
ENSG00000144744.16	UBA3	chr3	-	69071534	69071617	69067927	69068008	69075429	69075510	50,47	0,2	19,18	4,11	0.000142616	1.0,0.922	0.704,0.45	0.384	NA
ENSG00000144827.8	ABHD10	chr3	+	111986263	111986375	111979009	111979203	111986913	111987051	43,53	0,0	41,39	1,6	0.00934921	1.0,1.0	0.953,0.765	0.141	NA
ENSG00000145216.15	FIP1L1	chr4	+	53414614	53414722	53399729	53399839	53425871	53425965	65,75	64,68	46,16	76102	0.00108333	0.337,0.355	0.232,0.073	0.193	NA
ENSG00000145414.8	NAF1	chr4	-	163145781	163145864	163140222	163140383	163148340	163148434	28,32	0,1	28,17	3,5	0.00710952	1.0,0.941	0.824,0.63	0.243	NA
ENSG00000145451.12	GLRA3	chr4	-	174656742	174656787	174636913	174644064	174659053	174659197	5,5	18,15	0,0	8,2	0.0110137	0.149,0.174	0.0,0.0	0.161	NA
ENSG00000145833.15	DDX46	chr5	+	134790105	134790222	134788512	134788591	134790469	134790552	11,22	71104	28,52	64,50	0.001049	0.072,0.096	0.179,0.342	-0.177	NA
ENSG00000145996.11	CDKAL1	chr6	+	20535086	20535199	20534480	20534574	20535350	20535394	6,12	19,13	16,28	8,7	0.0136914	0.136,0.316	0.5,0.667	-0.358	NA
ENSG00000146067.15	FAM193B	chr5	-	177532155	177532200	177531337	177531521	177532442	177532612	9,15	21,36	30,49	20,20	0.000312023	0.213,0.208	0.486,0.607	-0.336	NA
ENSG00000146067.15	FAM193B	chr5	-	177531952	177532200	177531281	177531521	177532442	177532641	33,43	21,36	87147	20,20	2.19873e-05	0.44,0.374	0.685,0.786	-0.329	NA
ENSG00000146067.15	FAM193B	chr5	-	177531952	177532131	177531281	177531521	177532442	177532641	23,22	21,36	40,65	20,20	0.00898987	0.354,0.234	0.5,0.619	-0.266	NA
ENSG00000146067.15	FAM193B	chr5	-	177553167	177553350	177538910	177539147	177554248	177554347	14,21	3,2	36,40	0,0	0.0190866	0.7,0.84	1.0,1.0	-0.23	NA
ENSG00000146067.15	FAM193B	chr5	-	177547167	177547228	177538904	177539147	177554248	177554458	18,17	3,2	28,44	0,0	0.0183325	0.769,0.825	1.0,1.0	-0.203	NA
ENSG00000146476.10	ARMT1	chr6	+	151454547	151454653	151452286	151452586	151458327	151458572	273261	4,8	264133	14,20	0.00371137	0.972,0.942	0.904,0.769	0.12	NA
ENSG00000146757.13	ZNF92	chr7	+	65388805	65388901	65373880	65374000	65398340	65401081	17,10	0,3	3,2	2,6	0.0162685	1.0,0.625	0.429,0.143	0.526	NA
ENSG00000146828.17	SLC12A9	chr7	+	100861137	100861262	100860149	100860232	100861391	100861584	74,95	2,2	47,29	8,9	0.000415266	0.949,0.96	0.746,0.617	0.273	NA
ENSG00000146872.17	TLK2	chr17	+	62553662	62553755	62536169	62536337	62560015	62560034	117126	8,9	76,89	10,26	0.0346136	0.88,0.875	0.792,0.631	0.166	NA
ENSG00000147130.14	ZMYM3	chrX	-	71251177	71251244	71250431	71250726	71251557	71251601	226254	2,9	205135	5,28	0.0265913	0.984,0.938	0.956,0.719	0.124	NA
ENSG00000147394.18	ZNF185	chrX	+	152922719	152922809	152922172	152922256	152931671	152931776	154207	53,89	291289	73,33	0.0148355	0.592,0.538	0.666,0.814	-0.175	NA
ENSG00000147649.9	MTDH	chr8	+	97699753	97699852	97690951	97691188	97706625	97706750	429604	43,71	575405	85101	0.0469355	0.833,0.81	0.772,0.667	0.102	NA
ENSG00000147649.9	MTDH	chr8	+	97689037	97689103	97687428	97687605	97690951	97691188	477623	7,18	533366	33,90	1.20321e-05	0.973,0.949	0.896,0.685	0.17	NA
ENSG00000147852.15	VLDLR	chr9	+	2651414	2651498	2650369	2650516	2651873	2651954	28,16	60,54	15,2	96,64	0.00144703	0.189,0.129	0.072,0.015	0.116	NA
ENSG00000148090.11	AUH	chr9	-	91216058	91216106	91213814	91214425	91217276	91217327	52,56	6,7	25,6	0,0	0.00589733	0.842,0.831	1.0,1.0	-0.163	NA
ENSG00000148090.11	AUH	chr9	-	91217276	91217327	91213959	91214425	91220804	91220919	33,35	1,3	27,8	7,11	0.00916635	0.952,0.875	0.698,0.304	0.412	NA
ENSG00000148153.13	INIP	chr9	-	112689526	112689617	112683925	112687633	112694130	112694233	143129	0,1	116,68	5,14	4.94678e-05	1.0,0.985	0.921,0.708	0.178	NA
ENSG00000148180.17	GSN	chr9	+	121283318	121283392	121282438	121282550	121301962	121302149	6,4	6,6	0,0	8,5	0.000844962	0.336,0.253	0.0,0.0	0.294	NA
ENSG00000148337.20	CIZ1	chr9	-	128187862	128187934	128185546	128185776	128190328	128190444	399412	26,40	294227	59,48	0.0001506	0.887,0.841	0.719,0.708	0.15	-0.109
ENSG00000148358.19	GPR107	chr9	+	130110369	130110426	130107495	130107539	130127482	130127531	64,60	0,0	48,26	2,5	0.00708394	1.0,1.0	0.932,0.749	0.159	NA
ENSG00000148396.18	SEC16A	chr9	-	136445644	136445719	136443822	136443900	136446854	136447015	66,68	22,26	50,22	31,40	0.0466791	0.602,0.568	0.448,0.217	0.252	NA
ENSG00000148399.11	DPH7	chr9	-	137575708	137575892	137574751	137574843	137576079	137576167	10,15	6,0	7,10	0,0	0.0292017	0.455,1.0	1.0,1.0	-0.272	NA
ENSG00000148481.13	FAM188A	chr10	-	15821655	15821726	15796119	15796172	15833629	15833709	57,69	0,3	45,39	2,12	0.0314275	1.0,0.922	0.921,0.627	0.187	NA
ENSG00000148481.13	FAM188A	chr10	-	15816834	15816915	15796099	15796172	15833629	15833709	70,73	0,3	38,21	2,12	0.0192787	1.0,0.924	0.905,0.467	0.276	NA
ENSG00000148481.13	FAM188A	chr10	-	15838227	15838279	15837203	15837318	15841425	15841599	52,71	9,17	26,15	16,17	0.00573826	0.775,0.713	0.492,0.344	0.326	NA
ENSG00000148498.15	PARD3	chr10	-	34372497	34372536	34360070	34360259	34374873	34375002	61,82	153223	40,18	218174	0.000104607	0.209,0.196	0.109,0.064	0.116	-0.135
ENSG00000148814.17	LRRC27	chr10	+	132342212	132342271	132337564	132337695	132344497	132344650	22,18	3,11	8,1	12,10	0.0161884	0.805,0.48	0.273,0.053	0.48	-0.436
ENSG00000148925.10	BTBD10	chr11	-	13445023	13445181	13421641	13421838	13463099	13463181	22,24	0,0	23,12	6,4	0.000120676	1.0,1.0	0.657,0.6	0.371	NA
ENSG00000148950.9	IMMP1L	chr11	-	31463171	31463305	31433459	31433570	31509518	31509574	36,19	5,14	22,11	22,46	0.0424042	0.783,0.404	0.333,0.107	0.374	NA
ENSG00000148950.9	IMMP1L	chr11	-	31456259	31456386	31433459	31433570	31509518	31509563	20,19	5,14	9,8	22,46	0.000505618	0.667,0.404	0.17,0.08	0.411	NA
ENSG00000149182.14	ARFGAP2	chr11	-	47172280	47172333	47171663	47171800	47175014	47175098	65,88	9,3	55,35	10,30	0.0332118	0.81,0.945	0.765,0.408	0.291	-0.296
ENSG00000149187.17	CELF1	chr11	-	47499452	47499604	47488836	47489024	47500860	47500932	18,26	3,4	19,13	0,0	0.00547859	0.75,0.765	1.0,1.0	-0.242	NA
ENSG00000149257.13	SERPINH1	chr11	+	75563726	75563770	75562832	75562884	75566315	75566971	8,13	1,4	6,2	0,0	0.0132384	0.836,0.674	1.0,1.0	-0.245	NA
ENSG00000149476.14	TKFC	chr11	+	61336203	61336371	61335839	61335937	61337940	61338035	2,0	22,18	6,1	8,3	0.0183101	0.043,0.0	0.273,0.143	-0.187	NA
ENSG00000149503.12	INCENP	chr11	+	62141499	62141511	62140912	62141044	62144981	62145091	18,31	24,44	22,17	75,67	0.0139197	0.395,0.381	0.204,0.181	0.196	NA
ENSG00000149527.17	PLCH2	chr1	+	2497501	2497609	2496827	2497010	2498522	2498647	17,9	3,6	4,2	8,10	0.0143512	0.739,0.429	0.2,0.091	0.438	NA
ENSG00000149532.15	CPSF7	chr11	-	61420469	61420530	61419969	61420094	61421389	61421608	44,49	2,4	34,32	7,10	0.0424279	0.924,0.872	0.73,0.64	0.213	-0.345
ENSG00000149554.12	CHEK1	chr11	+	125637448	125637544	125635428	125635533	125643791	125643900	40,25	2,11	16,13	19,21	0.00826125	0.909,0.532	0.296,0.236	0.455	-0.465
ENSG00000149577.15	SIDT2	chr11	+	117186129	117186223	117184073	117184139	117187377	117187449	42,83	1,0	47,44	7,3	0.00314752	0.955,1.0	0.77,0.88	0.153	-0.4
ENSG00000149925.16	ALDOA	chr16	+	30068817	30068990	30067449	30067661	30069305	30069389	76123	14,12	128296	5,10	0.00730961	0.731,0.837	0.928,0.937	-0.149	NA
ENSG00000150093.18	ITGB1	chr10	-	32953592	32953809	32935491	32935558	32958144	32958196	14,12	78,97	46,43	72,87	2.41298e-05	0.082,0.058	0.242,0.198	-0.15	NA
ENSG00000150403.17	TMCO3	chr13	+	113503495	113503588	113501751	113501880	113510237	113510424	411324	27,60	156,62	50,47	0.00130448	0.884,0.73	0.609,0.397	0.304	-0.16
ENSG00000150456.10	N6AMT2	chr13	-	20737722	20737805	20731840	20732121	20757454	20757617	44,43	4,5	23,7	9,6	0.0261905	0.846,0.811	0.561,0.368	0.364	NA
ENSG00000150540.13	HNMT	chr2	+	137967096	137967386	137964478	137964628	137970164	137970217	31,42	22,27	37,41	11,5	0.0271463	0.413,0.438	0.627,0.804	-0.29	NA
ENSG00000150593.15	PDCD4	chr10	+	110875965	110876070	110871954	110872018	110881232	110881535	111,93	0,0	83,36	0,7	0.0252987	1.0,1.0	1.0,0.72	0.14	NA
ENSG00000150787.7	PTS	chr11	+	112230207	112230230	112228593	112228673	112230625	112230682	50,55	5,5	27,25	13,17	0.000237171	0.885,0.895	0.616,0.532	0.316	NA
ENSG00000150938.9	CRIM1	chr2	+	36396613	36396787	36355925	36356623	36441257	36441500	102110	3,0	79,60	5,12	0.00173741	0.944,1.0	0.888,0.714	0.171	NA
ENSG00000151090.17	THRB	chr3	-	24297225	24297323	24228937	24229001	24318357	24318494	13,12	2,5	21,17	1,0	0.00819327	0.765,0.545	0.913,1.0	-0.301	NA
ENSG00000151135.9	TMEM263	chr12	+	106957081	106957149	106955843	106956065	106967110	106967180	138166	89,87	115,47	128247	0.00025448	0.45,0.502	0.322,0.091	0.269	-0.13
ENSG00000151135.9	TMEM263	chr12	+	106959287	106959385	106957081	106957149	106967110	106967180	19,25	84,98	26,35	66,28	0.0462869	0.102,0.113	0.165,0.385	-0.168	NA
ENSG00000151292.17	CSNK1G3	chr5	+	123605338	123605362	123604723	123604830	123614341	123617040	9,10	38,46	2,0	34,41	0.00155655	0.153,0.143	0.043,0.0	0.127	NA
ENSG00000151332.18	MBIP	chr14	-	36311958	36312024	36311572	36311725	36314511	36314608	81111	1,4	72,47	19,26	1.10265e-07	0.977,0.937	0.67,0.492	0.376	NA
ENSG00000151465.13	CDC123	chr10	+	12215739	12215835	12210289	12210322	12217360	12217467	240216	4,8	155,77	17,38	0.00016605	0.968,0.931	0.82,0.503	0.288	-0.137
ENSG00000151466.11	SCLT1	chr4	-	128965226	128965318	128959599	128959777	128970377	128970468	29,26	3,5	12,2	0,0	0.00707827	0.829,0.722	1.0,1.0	-0.225	NA
ENSG00000151632.16	AKR1C2	chr10	-	4999199	4999277	4998624	4998747	5000549	5000666	364381	26,57	131,66	55,84	1.50646e-05	0.875,0.77	0.544,0.282	0.409	NA
ENSG00000151640.12	DPYSL4	chr10	+	132202645	132202825	132201945	132202116	132203761	132203927	77,94	26,20	107,80	16,2	0.041088	0.597,0.701	0.77,0.952	-0.212	-0.231
ENSG00000151748.14	SAV1	chr14	-	50667381	50667500	50665600	50665619	50667873	50668297	7,5	48,72	14,23	51,42	0.0036726	0.068,0.034	0.121,0.215	-0.117	NA
ENSG00000151876.12	FBXO4	chr5	+	41927012	41927248	41925253	41925498	41929696	41929917	28,19	5,3	7,2	5,4	0.0479577	0.737,0.76	0.412,0.2	0.442	NA
ENSG00000151883.16	PARP8	chr5	+	50760291	50760362	50759642	50759732	50761820	50761902	42,28	0,2	8,7	2,3	0.0310777	1.0,0.879	0.674,0.547	0.329	NA
ENSG00000152117.17	AC093838.4	chr2	+	131519813	131519942	131519534	131519666	131520096	131520421	6,11	45,51	29,65	43,45	3.41083e-05	0.063,0.097	0.252,0.419	-0.256	0.211
ENSG00000152133.14	GPATCH11	chr2	+	37090680	37090722	37089639	37089866	37091915	37092036	30,38	0,1	23,10	3,9	0.00092549	1.0,0.961	0.832,0.418	0.355	NA
ENSG00000152256.13	PDK1	chr2	+	172568740	172568817	172566855	172566933	172570725	172570824	409453	44,71	297137	101110	0.000117968	0.823,0.761	0.595,0.384	0.303	-0.51
ENSG00000152359.14	POC5	chr5	-	75707736	75707875	75705703	75705787	75717305	75717448	15,15	0,0	17,19	4,9	0.000120242	1.0,1.0	0.68,0.514	0.403	NA
ENSG00000152409.8	JMY	chr5	+	79312402	79312498	79306374	79306461	79314256	79314851	107130	2,3	145121	7,16	0.0224146	0.964,0.956	0.912,0.791	0.108	NA
ENSG00000152457.17	DCLRE1C	chr10	-	14947524	14947609	14945104	14945189	14949035	14949087	5,7	11,10	1,0	19,10	0.00126792	0.185,0.259	0.026,0.0	0.209	-0.283
ENSG00000152457.17	DCLRE1C	chr10	-	14942113	14942435	14939809	14939869	14945104	14945189	2,2	17,25	4,10	15,5	0.0416084	0.056,0.038	0.118,0.5	-0.262	NA
ENSG00000152457.17	DCLRE1C	chr10	-	14945434	14945565	14945104	14945189	14949035	14949087	14,14	11,10	4,2	19,10	0.00291214	0.389,0.412	0.095,0.091	0.307	NA
ENSG00000152464.14	RPP38	chr10	+	15102217	15102336	15097179	15097409	15103304	15104257	34,44	3,4	46,52	0,0	0.0106508	0.85,0.846	1.0,1.0	-0.152	NA
ENSG00000152520.13	PAN3	chr13	+	28271980	28272071	28270700	28270866	28277236	28277376	70102	0,1	90,51	4,5	0.0142506	1.0,0.981	0.918,0.836	0.113	NA
ENSG00000152556.15	PFKM	chr12	+	48135290	48135383	48134942	48135038	48137720	48137846	99155	45,59	163105	20,14	3.88911e-05	0.524,0.568	0.803,0.789	-0.25	NA
ENSG00000152601.17	MBNL1	chr3	+	152455541	152455577	152447724	152447773	152456266	152456361	49,51	40,36	26,10	42,45	0.00501302	0.455,0.491	0.297,0.132	0.258	-0.377
ENSG00000152683.14	SLC30A6	chr2	+	32184272	32184338	32171286	32171373	32192335	32192416	21,26	0,2	21,14	6,4	0.0170152	1.0,0.874	0.652,0.652	0.285	NA
ENSG00000152952.11	PLOD2	chr3	-	146077861	146077924	146073286	146073352	146079115	146079257	173225	21,19	184154	52,85	4.12896e-05	0.819,0.866	0.66,0.498	0.264	-0.239
ENSG00000153066.12	TXNDC11	chr16	-	11733981	11734079	11721576	11721670	11736016	11736233	80,99	2,1	77,55	4,12	0.00767534	0.952,0.98	0.906,0.696	0.165	NA
ENSG00000153066.12	TXNDC11	chr16	-	11700451	11700564	11698124	11698325	11721576	11721670	158192	6,13	119,68	13,20	0.0219947	0.929,0.881	0.821,0.63	0.179	NA
ENSG00000153066.12	TXNDC11	chr16	-	11730644	11730774	11721576	11721670	11736016	11736233	49,57	2,1	47,40	4,12	0.0176122	0.925,0.966	0.855,0.625	0.206	NA
ENSG00000153113.23	CAST	chr5	+	96729152	96729209	96727488	96727530	96729611	96729725	535608	84103	375251	166133	1.49867e-10	0.785,0.772	0.564,0.519	0.237	-0.168
ENSG00000153113.23	CAST	chr5	+	96729152	96729209	96722638	96722698	96729611	96729725	281329	12,16	191137	19,21	0.0102189	0.931,0.922	0.852,0.789	0.106	NA
ENSG00000153214.9	TMEM87B	chr2	+	112074911	112074962	112066935	112067067	112077191	112077282	42,42	4,1	26,4	9,4	0.0124732	0.863,0.962	0.634,0.375	0.408	NA
ENSG00000153317.14	ASAP1	chr8	-	130179263	130179349	130168991	130169067	130180750	130180862	49,56	0,1	49,38	4,4	0.0171882	1.0,0.966	0.86,0.826	0.14	NA
ENSG00000153339.13	TRAPPC8	chr18	-	31832083	31832173	31829937	31830989	31839311	31839457	69,66	0,1	59,47	3,5	0.019671	1.0,0.971	0.908,0.825	0.119	NA
ENSG00000153944.10	MSI2	chr17	+	57676986	57677059	57674971	57675126	57679548	57684685	302295	27,21	184,89	40,42	0.000195149	0.851,0.878	0.701,0.519	0.255	-0.358
ENSG00000154102.10	C16orf74	chr16	-	85710163	85710285	85707653	85708066	85735189	85735235	57,55	1,3	62,48	9,7	0.0475859	0.966,0.902	0.775,0.774	0.159	NA
ENSG00000154144.12	TBRG1	chr11	+	124626472	124626609	124625670	124625903	124626903	124627050	6,5	13,20	0,0	7,5	0.0102178	0.188,0.111	0.0,0.0	0.149	NA
ENSG00000154265.15	ABCA5	chr17	-	69251746	69251866	69250471	69250621	69253572	69253667	285280	10,15	155114	11,24	0.0314671	0.934,0.903	0.876,0.704	0.129	-0.359
ENSG00000154316.14	TDH	chr8	+	11359213	11359284	11358135	11358178	11361385	11361535	9,26	0,0	22,14	5,3	0.000966039	1.0,1.0	0.695,0.707	0.299	NA
ENSG00000154358.19	OBSCN	chr1	+	228224458	228224734	228217012	228217288	228243182	228243458	10,9	5,4	9,16	0,0	0.000104206	0.5,0.529	1.0,1.0	-0.486	NA
ENSG00000154358.19	OBSCN	chr1	+	228219323	228219599	228217012	228217288	228243182	228243458	5,20	5,4	14,5	0,0	0.000288948	0.333,0.714	1.0,1.0	-0.477	NA
ENSG00000154358.19	OBSCN	chr1	+	228308110	228308383	228307258	228307531	228309098	228309295	23,22	8,7	10,6	0,0	0.000558231	0.59,0.611	1.0,1.0	-0.399	NA
ENSG00000154358.19	OBSCN	chr1	+	228368338	228368416	228367885	228367946	228368721	228368894	18,14	4,2	10,2	0,0	0.00600776	0.692,0.778	1.0,1.0	-0.265	NA
ENSG00000154781.15	CCDC174	chr3	+	14667423	14667518	14666804	14666947	14668048	14668181	195248	3,5	159,81	4,17	0.0202495	0.97,0.961	0.952,0.704	0.138	NA
ENSG00000154889.16	MPPE1	chr18	-	11886712	11886781	11886498	11886621	11886916	11887025	7,9	10,5	15,7	1,1	0.00685755	0.269,0.486	0.887,0.786	-0.459	NA
ENSG00000154889.16	MPPE1	chr18	-	11886712	11886778	11886498	11886621	11886916	11887025	19,19	10,5	17,14	1,1	0.0313282	0.504,0.671	0.901,0.882	-0.304	NA
ENSG00000155066.15	PROM2	chr2	+	95276971	95277061	95276226	95276347	95277363	95277496	15,23	11,15	31,32	5,4	0.00495503	0.405,0.434	0.756,0.8	-0.359	-0.489
ENSG00000155100.10	OTUD6B	chr8	+	91076591	91076731	91073830	91073911	91078355	91078668	21,25	44,45	45,43	41,21	0.0156689	0.193,0.217	0.354,0.506	-0.225	NA
ENSG00000155189.11	AGPAT5	chr8	+	6724869	6724939	6708356	6708887	6730710	6730826	53,90	1,7	70,20	19,17	0.000678052	0.965,0.87	0.657,0.38	0.399	-0.178
ENSG00000155189.11	AGPAT5	chr8	+	6747669	6747828	6732560	6732650	6755050	6755174	54,63	0,2	76,40	9,13	0.000431154	1.0,0.94	0.809,0.606	0.262	NA
ENSG00000155189.11	AGPAT5	chr8	+	6741660	6741751	6732560	6732650	6755050	6755174	41,57	0,2	60,41	9,13	0.000429543	1.0,0.934	0.769,0.612	0.277	NA
ENSG00000155313.15	USP25	chr21	+	15808808	15808885	15805120	15805258	15811136	15811210	98111	5,3	100,72	10,14	0.0240098	0.907,0.949	0.833,0.72	0.151	NA
ENSG00000155313.15	USP25	chr21	+	15830530	15830601	15826976	15827203	15831400	15831629	142165	0,1	173,78	10,23	1.80052e-06	1.0,0.988	0.899,0.637	0.226	NA
ENSG00000155508.13	CNOT8	chr5	+	154865191	154865385	154858538	154858768	154871729	154871874	13,22	0,0	27,51	0,7	0.0236194	1.0,1.0	1.0,0.785	0.107	NA
ENSG00000156304.14	SCAF4	chr21	-	31705422	31705467	31703764	31703926	31706273	31706357	26,49	0,1	34,32	1,21	0.00597697	1.0,0.969	0.955,0.49	0.262	NA
ENSG00000156345.17	CDK20	chr9	-	87970567	87970630	87969193	87969349	87970775	87970897	6,12	5,5	1,0	17,6	9.95464e-06	0.396,0.568	0.031,0.0	0.466	NA
ENSG00000156787.16	TBC1D31	chr8	+	123142261	123142456	123140760	123140901	123144716	123144855	22,14	2,5	8,7	0,0	0.003184	0.846,0.583	1.0,1.0	-0.286	NA
ENSG00000156787.16	TBC1D31	chr8	+	123134113	123134206	123130197	123130333	123140760	123140901	31,32	0,0	19,12	1,4	0.0173901	1.0,1.0	0.905,0.6	0.248	NA
ENSG00000156860.15	FBRS	chr16	+	30661303	30661333	30660262	30660442	30662419	30662468	52,44	32,39	29,18	41,43	0.031714	0.54,0.449	0.338,0.232	0.21	-0.341
ENSG00000156869.12	FRRS1	chr1	-	99740792	99740940	99738085	99738268	99742178	99742273	29,45	0,0	53,39	0,8	0.0159176	1.0,1.0	1.0,0.709	0.145	NA
ENSG00000156976.14	EIF4A2	chr3	+	186788309	186788420	186787802	186787882	186789124	186789291	551667	8881174	294191	932801	8.23386e-08	0.237,0.221	0.136,0.107	0.107	NA
ENSG00000157077.14	ZFYVE9	chr1	+	52340125	52340231	52337771	52337934	52344767	52344944	27,38	0,1	31,4	1,6	0.0230601	1.0,0.95	0.939,0.25	0.38	NA
ENSG00000157106.16	SMG1	chr16	-	18899986	18900044	18896792	18896956	18925949	18926158	34,37	48,47	14,9	56,46	0.00109303	0.287,0.309	0.124,0.1	0.186	-0.237
ENSG00000157388.13	CACNA1D	chr3	+	53673022	53673126	53666400	53666535	53702640	53702810	12,8	3,3	5,3	0,0	0.00131779	0.667,0.571	1.0,1.0	-0.381	NA
ENSG00000157388.13	CACNA1D	chr3	+	53673712	53673816	53666338	53666535	53702640	53702810	12,9	3,3	1,1	0,0	0.00395825	0.667,0.6	1.0,1.0	-0.367	NA
ENSG00000157500.10	APPL1	chr3	+	57253681	57253738	57252268	57252311	57256956	57257051	96110	0,0	74,40	1,7	0.00796807	1.0,1.0	0.977,0.766	0.129	NA
ENSG00000157538.13	DSCR3	chr21	-	37233361	37233442	37232376	37232451	37238459	37238609	115177	13,6	82,34	29,30	1.02687e-05	0.816,0.937	0.586,0.362	0.403	-0.217
ENSG00000157796.17	WDR19	chr4	+	39189655	39189781	39186538	39186604	39203641	39203722	15,19	0,0	9,4	1,3	0.0260933	1.0,1.0	0.818,0.4	0.391	-0.147
ENSG00000157881.13	PANK4	chr1	-	2512887	2513039	2511627	2511683	2514001	2514089	42,52	3,6	132123	4,0	0.0368584	0.875,0.813	0.943,1.0	-0.128	NA
ENSG00000157954.14	WIPI2	chr7	+	5193117	5193171	5190245	5190493	5199575	5199658	43,35	49100	12,4	48,36	0.0325787	0.34,0.17	0.128,0.061	0.161	-0.186
ENSG00000158023.9	WDR66	chr12	+	121951479	121951530	121942894	121942975	121954119	121954334	13,23	1,4	20,11	0,0	0.0383355	0.886,0.775	1.0,1.0	-0.169	NA
ENSG00000158106.12	RHPN1	chr8	+	143376524	143376653	143375552	143375668	143377379	143377455	60,54	6,4	32,33	0,0	0.00486936	0.833,0.871	1.0,1.0	-0.148	-0.3
ENSG00000158106.12	RHPN1	chr8	+	143378695	143378820	143378268	143378346	143378911	143379078	24,20	3,2	13,8	0,0	0.0479975	0.8,0.833	1.0,1.0	-0.183	NA
ENSG00000158402.18	CDC25C	chr5	-	138329552	138329647	138328483	138328529	138330986	138331218	60,62	10,12	45,24	33,28	2.71949e-05	0.75,0.721	0.405,0.3	0.383	-0.29
ENSG00000158402.18	CDC25C	chr5	-	138325814	138325904	138319218	138319374	138328483	138328529	59,64	7,12	52,28	19,20	0.024745	0.808,0.727	0.578,0.412	0.273	NA
ENSG00000158402.18	CDC25C	chr5	-	138326020	138326054	138319218	138319374	138328483	138328529	30,31	7,12	17,9	19,20	0.002842	0.749,0.642	0.383,0.238	0.385	NA
ENSG00000158545.15	ZC3H18	chr16	+	88587541	88587613	88586599	88586684	88598177	88598326	38,32	32,59	19,14	50,58	0.0426093	0.379,0.218	0.163,0.11	0.162	-0.214
ENSG00000158636.16	C11orf30	chr11	+	76459932	76460085	76458182	76458358	76463820	76464080	62,75	10,6	84,90	3,2	0.044801	0.756,0.862	0.933,0.957	-0.136	NA
ENSG00000158856.17	DMTN	chr8	+	22069015	22069060	22067526	22067682	22069418	22069518	66,49	1,1	49,28	7,9	0.000453348	0.977,0.969	0.815,0.662	0.235	NA
ENSG00000159314.11	ARHGAP27	chr17	-	45396486	45396585	45396206	45396284	45396667	45396790	58,76	2,0	61,30	5,5	0.0144825	0.935,1.0	0.859,0.75	0.163	NA
ENSG00000159322.17	ADPGK	chr15	-	72771782	72771845	72760406	72760527	72774871	72775097	249232	2,4	233172	15,17	0.000111509	0.986,0.969	0.895,0.847	0.107	NA
ENSG00000159788.18	RGS12	chr4	+	3428557	3428711	3428089	3428169	3430406	3432250	51,73	6,16	28,22	16,12	0.0230601	0.81,0.695	0.467,0.478	0.28	NA
ENSG00000159842.14	ABR	chr17	-	1012473	1012557	1011845	1011985	1012687	1012797	6,14	170209	18,32	141,51	8.3871e-05	0.017,0.032	0.06,0.239	-0.125	NA
ENSG00000160087.20	UBE2J2	chr1	-	1256044	1256125	1255047	1255487	1256991	1257130	253269	4,0	212104	5,30	0.000210143	0.969,1.0	0.955,0.634	0.19	NA
ENSG00000160271.14	RALGDS	chr9	-	133109625	133109721	133108672	133108866	133110295	133110489	267282	1,1	226110	2,16	0.000439265	0.993,0.993	0.983,0.775	0.114	NA
ENSG00000160410.14	SHKBP1	chr19	+	40578153	40578212	40577556	40577709	40578461	40578542	40,38	0,1	39,18	3,4	0.0174513	1.0,0.955	0.88,0.717	0.179	-0.176
ENSG00000160439.15	RDH13	chr19	-	55048045	55048257	55047386	55047488	55048328	55048541	44,67	65,53	89,59	40,12	0.00925501	0.253,0.387	0.527,0.711	-0.299	0.323
ENSG00000160563.13	MED27	chr9	-	131893884	131893992	131884057	131884099	131939380	131939474	20,29	0,0	40,21	4,3	0.0102189	1.0,1.0	0.833,0.778	0.195	NA
ENSG00000160685.13	ZBTB7B	chr1	+	155014014	155014093	155002844	155002943	155014654	155014719	32,23	95,89	19,1	164155	4.21041e-06	0.144,0.114	0.055,0.003	0.1	NA
ENSG00000160746.12	ANO10	chr3	-	43574808	43574864	43565652	43565727	43576691	43577261	36,35	0,0	33,15	0,7	0.0211884	1.0,1.0	1.0,0.553	0.224	NA
ENSG00000160766.14	GBAP1	chr1	-	155218387	155218479	155217239	155218049	155218847	155219018	5,9	8,2	1,0	2,1	0.0355652	0.238,0.692	0.2,0.0	0.365	NA
ENSG00000160796.16	NBEAL2	chr3	+	46998066	46998226	46997560	46997694	46998462	46998565	40,51	10,7	17,22	14,18	0.00280747	0.667,0.785	0.378,0.379	0.347	-0.443
ENSG00000161204.11	ABCF3	chr3	+	184187363	184187443	184186795	184186875	184187663	184187761	88114	1,2	73,51	6,6	0.0132863	0.978,0.966	0.859,0.81	0.137	NA
ENSG00000161249.20	DMKN	chr19	-	35509910	35509961	35505717	35505765	35510183	35510252	71,78	9,10	45,38	21,25	0.000212892	0.826,0.824	0.563,0.477	0.305	NA
ENSG00000161267.11	BDH1	chr3	-	197554561	197554713	197546360	197546486	197555780	197555987	33,42	55,61	32,34	21,18	0.00989766	0.231,0.256	0.432,0.486	-0.215	NA
ENSG00000161526.14	SAP30BP	chr17	+	75671815	75671863	75668515	75668625	75693439	75693482	347369	27,35	260121	47,90	0.00907006	0.888,0.866	0.773,0.453	0.264	NA
ENSG00000161714.11	PLCD3	chr17	-	45112862	45113012	45112422	45112704	45113121	45113257	40,42	4,6	30,24	0,0	0.00218794	0.833,0.778	1.0,1.0	-0.195	NA
ENSG00000161996.17	WDR90	chr16	+	655028	655147	653745	653803	655306	655468	13,14	5,5	10,10	1,0	0.00803023	0.565,0.583	0.833,1.0	-0.343	NA
ENSG00000162066.14	AMDHD2	chr16	+	2528993	2529095	2528649	2528718	2529474	2529698	15,28	5,4	16,13	0,1	0.0180275	0.6,0.778	1.0,0.867	-0.244	NA
ENSG00000162139.9	NEU3	chr11	+	75004304	75004405	74994508	74994720	75005412	75005469	6,2	7,11	1,0	11,4	0.0352384	0.3,0.083	0.043,0.0	0.17	NA
ENSG00000162227.7	TAF6L	chr11	+	62781893	62781968	62778868	62778963	62782112	62782465	30,30	1,0	20,11	3,3	0.0121326	0.938,1.0	0.77,0.649	0.259	NA
ENSG00000162298.16	SYVN1	chr11	-	65132247	65132308	65131469	65131596	65132731	65132780	18,35	1,0	21,14	2,10	0.00356026	0.909,1.0	0.854,0.437	0.309	NA
ENSG00000162521.18	RBBP4	chr1	+	32679639	32679817	32672790	32672901	32680525	32680653	147145	2,6	67,42	6,10	0.00937293	0.974,0.924	0.848,0.677	0.187	NA
ENSG00000162601.9	MYSM1	chr1	-	58689037	58689116	58685152	58685251	58690225	58690249	41,42	0,2	17,33	3,6	0.0157373	1.0,0.913	0.739,0.733	0.221	NA
ENSG00000162819.11	BROX	chr1	+	222722418	222722514	222719262	222719359	222724091	222724164	134187	4,4	106,61	7,18	0.00495503	0.944,0.959	0.883,0.629	0.196	NA
ENSG00000162885.12	B3GALNT2	chr1	-	235470849	235470960	235458602	235458786	235480053	235480149	14,22	0,0	8,15	3,3	0.00090712	1.0,1.0	0.571,0.714	0.358	NA
ENSG00000162910.18	MRPL55	chr1	-	228108436	228108474	228108234	228108318	228109148	228109306	14,28	53,48	43,49	38,12	0.00865361	0.15,0.281	0.431,0.732	-0.366	0.233
ENSG00000162910.18	MRPL55	chr1	-	228108436	228108474	228108234	228108318	228108954	228109021	12,26	25,27	37,43	15,10	0.00202595	0.243,0.392	0.623,0.742	-0.365	NA
ENSG00000162910.18	MRPL55	chr1	-	228108436	228108508	228108234	228108318	228108954	228109016	22,37	25,27	50,48	15,10	0.00345322	0.311,0.413	0.631,0.711	-0.309	NA
ENSG00000162910.18	MRPL55	chr1	-	228108436	228109021	228108234	228108318	228109148	228109299	34,46	53,48	61,52	38,12	0.0309025	0.243,0.324	0.445,0.684	-0.281	NA
ENSG00000162959.13	MEMO1	chr2	-	31883385	31883462	31869847	31869952	31891991	31892134	118142	11,19	70,43	24,24	0.000544621	0.843,0.789	0.593,0.473	0.283	-0.159
ENSG00000162971.10	TYW5	chr2	-	199936404	199936492	199935930	199936047	199938932	199939070	73,83	0,0	53,13	5,4	0.000372216	1.0,1.0	0.841,0.619	0.27	NA
ENSG00000162976.12	PQLC3	chr2	+	11174967	11175009	11171924	11172045	11177736	11178024	98,60	44,57	45,22	56,62	0.0395015	0.59,0.405	0.342,0.187	0.233	NA
ENSG00000162980.16	ARL5A	chr2	-	151812356	151812440	151806820	151806972	151814168	151814316	240311	2,4	250188	8,31	0.000103195	0.984,0.975	0.94,0.752	0.134	NA
ENSG00000163002.12	NUP35	chr2	+	183151507	183151649	183133565	183133623	183157443	183157513	107128	5,3	111,57	7,15	0.0455804	0.915,0.955	0.888,0.655	0.163	-0.122
ENSG00000163002.12	NUP35	chr2	+	183130994	183131352	183130417	183130545	183133565	183133623	0,2	25,22	6,6	15,16	0.00629233	0.0,0.043	0.167,0.158	-0.141	NA
ENSG00000163071.10	SPATA18	chr4	+	52069820	52069916	52062219	52062332	52071916	52072013	6,9	10,24	0,0	4,2	0.00887526	0.231,0.158	0.0,0.0	0.195	NA
ENSG00000163110.14	PDLIM5	chr4	+	94523723	94523875	94455246	94455384	94573350	94573393	188267	1,3	220176	8,18	0.000281588	0.989,0.978	0.932,0.83	0.103	NA
ENSG00000163125.15	RPRD2	chr1	+	150441880	150441958	150440922	150441023	150443230	150443283	98,84	84112	39,8	105,77	1.1136e-05	0.368,0.273	0.157,0.049	0.217	-0.207
ENSG00000163170.11	BOLA3	chr2	-	74142271	74142360	74135397	74135658	74145188	74145303	174199	30,45	209258	68,97	0.0383355	0.744,0.689	0.606,0.571	0.128	NA
ENSG00000163249.9	CCNYL1	chr2	+	207740654	207740706	207726841	207726876	207742222	207742342	83,62	1,1	42,27	4,3	0.0437879	0.98,0.974	0.862,0.843	0.124	NA
ENSG00000163319.10	MRPS18C	chr4	+	83458345	83458429	83456908	83456958	83459739	83459797	169158	40,81	90,31	122104	2.92201e-06	0.679,0.494	0.269,0.13	0.387	-0.273
ENSG00000163319.10	MRPS18C	chr4	+	83458345	83458429	83456908	83456958	83460972	83461032	49,51	7,7	21,8	10,31	0.00265663	0.778,0.785	0.512,0.114	0.469	NA
ENSG00000163374.19	YY1AP1	chr1	-	155680415	155680456	155679408	155679512	155688070	155688656	120137	3,6	139,71	11,22	0.00745544	0.963,0.937	0.892,0.678	0.165	NA
ENSG00000163374.19	YY1AP1	chr1	-	155680415	155680456	155679927	155680008	155688070	155688656	22,32	0,0	38,15	2,5	0.00799502	1.0,1.0	0.925,0.662	0.206	NA
ENSG00000163517.14	HDAC11	chr3	+	13496735	13496852	13483463	13483564	13501870	13501933	20,23	7,2	15,11	13,11	0.0497189	0.588,0.852	0.366,0.333	0.37	-0.867
ENSG00000163517.14	HDAC11	chr3	+	13496735	13496852	13483463	13483564	13500712	13500789	21,25	4,13	16,10	23,19	0.0156128	0.724,0.49	0.258,0.208	0.374	-0.385
ENSG00000163517.14	HDAC11	chr3	+	13498512	13498555	13483463	13483564	13500712	13500789	44,63	4,13	30,15	23,19	0.000111509	0.876,0.756	0.455,0.336	0.421	NA
ENSG00000163528.12	CHCHD4	chr3	-	14121916	14122086	14116425	14116524	14124654	14124870	14,9	7,10	5,2	16,19	0.00714015	0.5,0.31	0.135,0.05	0.313	NA
ENSG00000163539.16	CLASP2	chr3	-	33663444	33663515	33644756	33644903	33684358	33684456	39,46	0,0	33,14	3,3	0.00779965	1.0,1.0	0.851,0.707	0.221	NA
ENSG00000163605.14	PPP4R2	chr3	+	73063672	73063747	73061022	73061060	73064002	73064146	76,75	0,1	87,52	6,13	0.000146431	1.0,0.974	0.879,0.668	0.213	NA
ENSG00000163607.14	GTPBP8	chr3	+	112995136	112995265	112993074	112993124	112996891	112996991	15,27	2,6	23,11	0,1	0.021266	0.789,0.692	1.0,0.846	-0.183	-0.51
ENSG00000163607.14	GTPBP8	chr3	+	112995134	112995265	112993025	112993124	112996891	112996991	31,39	2,6	36,12	0,1	0.042015	0.886,0.765	1.0,0.857	-0.103	NA
ENSG00000163608.14	C3orf17	chr3	-	113010642	113010704	113008170	113008430	113011044	113011305	212227	8,19	144105	29,39	2.11778e-05	0.936,0.868	0.733,0.598	0.237	NA
ENSG00000163660.11	CCNL1	chr3	-	157157006	157157083	157153035	157153156	157158865	157158975	83133	72102	94120	150188	0.00323965	0.366,0.395	0.239,0.242	0.14	NA
ENSG00000163660.11	CCNL1	chr3	-	157156935	157157083	157153035	157153156	157158865	157158975	148210	72102	161187	150188	0.000712191	0.507,0.507	0.349,0.332	0.166	NA
ENSG00000163660.11	CCNL1	chr3	-	157157010	157157083	157153035	157153156	157158865	157158975	124161	72102	111137	150188	9.33355e-05	0.468,0.446	0.274,0.271	0.184	NA
ENSG00000163660.11	CCNL1	chr3	-	157151916	157151930	157150281	157150381	157152176	157152241	12,10	25,37	5,3	60110	0.000192199	0.29,0.187	0.066,0.023	0.194	NA
ENSG00000163689.18	C3orf67	chr3	-	58913707	58913864	58884544	58884709	58937647	58937762	21,16	4,4	22,8	0,0	0.00117475	0.724,0.667	1.0,1.0	-0.304	0.227
ENSG00000163689.18	C3orf67	chr3	-	58913697	58913864	58884544	58884709	58937647	58937762	13,15	4,4	19,6	0,0	0.000640605	0.619,0.652	1.0,1.0	-0.365	NA
ENSG00000163689.18	C3orf67	chr3	-	58884544	58884709	58870172	58870309	58913707	58913864	14,6	2,3	5,5	0,0	0.00515324	0.778,0.5	1.0,1.0	-0.361	NA
ENSG00000163703.17	CRELD1	chr3	+	9937561	9937672	9934834	9934917	9940849	9941026	81121	30,40	112110	19,14	0.0143806	0.574,0.602	0.747,0.797	-0.184	NA
ENSG00000163714.17	U2SURP	chr3	+	143023974	143024018	143022852	143023064	143027148	143027253	58,51	12,10	17,3	14,26	0.000441928	0.754,0.764	0.436,0.068	0.507	-0.264
ENSG00000163719.18	MTMR14	chr3	+	9697710	9697866	9688943	9689082	9701789	9702216	24,44	7,5	41,20	0,0	0.000385604	0.632,0.815	1.0,1.0	-0.276	0.341
ENSG00000163719.18	MTMR14	chr3	+	9689963	9690143	9688943	9689082	9701789	9702393	100111	7,5	103,76	0,0	0.00291468	0.877,0.917	1.0,1.0	-0.103	NA
ENSG00000163781.12	TOPBP1	chr3	-	133652462	133652629	133649779	133649943	133653344	133653524	99121	0,1	113,41	1,8	0.014225	1.0,0.984	0.983,0.719	0.141	NA
ENSG00000163781.12	TOPBP1	chr3	-	133652462	133652547	133649779	133649943	133653344	133653468	66,98	0,1	91,32	1,8	0.0145316	1.0,0.98	0.978,0.667	0.167	NA
ENSG00000163781.12	TOPBP1	chr3	-	133652462	133652614	133649933	133649943	133653344	133653524	71108	0,1	114,29	1,8	0.0172853	1.0,0.982	0.983,0.644	0.177	NA
ENSG00000163798.13	SLC4A1AP	chr2	+	27682247	27682359	27677737	27677924	27685036	27685277	82105	0,0	59,57	5,3	0.00630944	1.0,1.0	0.855,0.905	0.12	NA
ENSG00000163808.16	KIF15	chr3	+	44780884	44780922	44778114	44778191	44784844	44784942	33,24	0,0	33,12	2,7	0.00247856	1.0,1.0	0.917,0.534	0.274	NA
ENSG00000163812.13	ZDHHC3	chr3	-	44932906	44932990	44929305	44929436	44933117	44933199	31,28	46,46	19,12	65,62	0.0111803	0.252,0.233	0.128,0.088	0.135	NA
ENSG00000163947.11	ARHGEF3	chr3	-	57007181	57007336	56958822	56958889	57035087	57035176	9,12	3,9	0,0	3,5	0.000106365	0.6,0.4	0.0,0.0	0.5	NA
ENSG00000164050.12	PLXNB1	chr3	-	48420223	48420257	48419576	48419674	48420664	48420773	11,10	5,2	3,2	0,0	0.00221283	0.604,0.776	1.0,1.0	-0.31	NA
ENSG00000164062.12	APEH	chr3	+	49675182	49675309	49674488	49674621	49675693	49675787	63,71	10,9	29,27	0,0	0.00039716	0.759,0.798	1.0,1.0	-0.222	NA
ENSG00000164073.9	MFSD8	chr4	-	127938782	127938838	127932984	127933093	127942044	127942158	31,43	2,1	18,7	3,9	0.0158884	0.899,0.961	0.776,0.31	0.387	NA
ENSG00000164073.9	MFSD8	chr4	-	127939852	127939997	127932984	127933093	127942044	127942158	13,14	2,1	5,2	3,9	0.00526389	0.765,0.875	0.455,0.1	0.542	NA
ENSG00000164118.12	CEP44	chr4	+	174297965	174298062	174283968	174284140	174299071	174299210	37,68	1,1	53,32	5,8	0.00705901	0.949,0.971	0.841,0.667	0.206	NA
ENSG00000164124.10	TMEM144	chr4	+	158232900	158232982	158219309	158219390	158237524	158237643	12,22	0,0	24,7	7,4	9.31025e-05	1.0,1.0	0.632,0.467	0.451	NA
ENSG00000164169.12	PRMT9	chr4	-	147670640	147670743	147668538	147668645	147672958	147673126	22,16	0,1	10,2	1,3	0.0377843	1.0,0.889	0.833,0.25	0.403	NA
ENSG00000164180.13	TMEM161B	chr5	-	88228444	88228528	88220562	88220719	88268720	88268829	24,23	0,0	21,17	0,5	0.048829	1.0,1.0	1.0,0.63	0.185	NA
ENSG00000164190.16	NIPBL	chr5	+	37057185	37057332	37052365	37052566	37058890	37059165	223214	13,11	202135	28,27	0.00170549	0.896,0.907	0.783,0.714	0.153	NA
ENSG00000164221.12	CCDC112	chr5	-	115269702	115269798	115268881	115269000	115271212	115271626	48,72	1,5	29,24	8,12	0.000824984	0.96,0.878	0.644,0.5	0.347	NA
ENSG00000164309.14	CMYA5	chr5	+	79743826	79743922	79689876	79690056	79745221	79745455	78,65	0,0	33,28	0,6	0.0235361	1.0,1.0	1.0,0.7	0.15	NA
ENSG00000164331.9	ANKRA2	chr5	-	73555487	73555585	73554860	73554986	73557574	73557640	113146	0,0	114,46	2,5	0.0424042	1.0,1.0	0.966,0.821	0.107	NA
ENSG00000164465.18	DCBLD1	chr6	+	117525361	117525434	117521524	117521576	117538619	117538835	43,56	1,0	63,22	1,6	0.0342896	0.956,1.0	0.97,0.652	0.167	NA
ENSG00000164548.10	TRA2A	chr7	-	23522353	23522432	23521706	23521840	23531788	23532023	27,31	22,32	21,15	50,39	0.016084	0.38,0.326	0.174,0.161	0.185	0.361
ENSG00000164548.10	TRA2A	chr7	-	23522131	23522432	23521706	23521840	23531788	23532041	31,33	22,32	21,21	50,39	0.0229419	0.413,0.34	0.174,0.212	0.183	0.382
ENSG00000164548.10	TRA2A	chr7	-	23522120	23522432	23521706	23521840	23531788	23531980	44,56	22,32	32,18	50,39	0.000304286	0.5,0.467	0.242,0.188	0.269	0.403
ENSG00000164615.4	CAMLG	chr5	+	134743986	134744052	134741062	134741523	134750758	134751377	337416	8,8	141107	10,31	6.6012e-05	0.958,0.965	0.883,0.649	0.196	NA
ENSG00000164638.10	SLC29A4	chr7	+	5296935	5297198	5291729	5291821	5298987	5299126	27,36	5,6	23,42	1,1	0.0372668	0.73,0.75	0.92,0.955	-0.198	-0.195
ENSG00000164654.15	MIOS	chr7	+	7588497	7588563	7585635	7585805	7594979	7595132	40,39	0,1	29,32	0,9	0.0244841	1.0,0.954	1.0,0.656	0.149	NA
ENSG00000164815.10	ORC5	chr7	-	104183942	104184033	104167993	104168525	104188250	104188381	56,69	1,3	45,27	5,8	0.0255569	0.966,0.92	0.818,0.628	0.22	NA
ENSG00000164830.17	OXR1	chr8	+	106737519	106737600	106713822	106713985	106739457	106739583	93100	189286	58,23	288236	4.03711e-06	0.197,0.149	0.091,0.046	0.104	-0.105
ENSG00000164877.18	MICALL2	chr7	-	1434209	1435147	1428618	1428791	1436741	1436856	65,44	20,20	24,13	24,16	0.0150311	0.619,0.524	0.333,0.289	0.261	-0.309
ENSG00000164877.18	MICALL2	chr7	-	1435100	1435147	1434365	1434672	1436741	1436856	60,49	2,6	26,27	17,11	0.00026398	0.949,0.835	0.487,0.603	0.347	-0.234
ENSG00000164933.11	SLC25A32	chr8	-	103404775	103404861	103403163	103403324	103407633	103407784	135142	1,7	116,37	6,15	0.041088	0.985,0.91	0.906,0.552	0.218	NA
ENSG00000164941.13	INTS8	chr8	+	94836523	94836631	94831991	94832174	94841490	94841591	131137	2,0	107,77	2,14	0.00180038	0.97,1.0	0.964,0.733	0.136	NA
ENSG00000164941.13	INTS8	chr8	+	94838462	94838618	94831991	94832174	94841490	94841591	86,74	2,0	87,47	2,14	0.00955376	0.956,1.0	0.956,0.627	0.186	NA
ENSG00000164944.11	KIAA1429	chr8	-	94537102	94537151	94534838	94535007	94543826	94543942	84122	4,8	103,86	11,22	0.0468513	0.928,0.903	0.851,0.704	0.138	NA
ENSG00000164953.15	TMEM67	chr8	+	93785221	93785378	93782394	93782460	93786222	93786346	58,48	0,0	6,3	1,3	0.01236	1.0,1.0	0.75,0.333	0.459	NA
ENSG00000165025.14	SYK	chr9	+	90867130	90867199	90865047	90865097	90874203	90874291	14,10	9,3	3,7	0,0	0.000331589	0.449,0.636	1.0,1.0	-0.458	-0.609
ENSG00000165105.9	RASEF	chr9	-	83007436	83007505	83005415	83005500	83009640	83009756	129127	12,20	59,14	26,10	0.00102884	0.849,0.769	0.543,0.423	0.326	-0.193
ENSG00000165219.21	GAPVD1	chr9	+	125342218	125342299	125341176	125341264	125346818	125346941	168205	1,5	169,82	14,59	0.000326291	0.988,0.953	0.858,0.41	0.336	-0.107
ENSG00000165219.21	GAPVD1	chr9	+	125295457	125295574	125268935	125268984	125298889	125299106	16,18	4,3	12,32	1,0	0.013534	0.667,0.75	0.857,1.0	-0.22	NA
ENSG00000165219.21	GAPVD1	chr9	+	125268935	125268984	125261809	125261959	125298889	125299106	13,11	4,11	6,5	14,38	0.00767534	0.665,0.379	0.207,0.074	0.382	NA
ENSG00000165233.17	CARD19	chr9	+	93111878	93111938	93110567	93110721	93112217	93112289	121120	23,38	114,83	57,73	0.00851092	0.746,0.639	0.528,0.389	0.234	-0.556
ENSG00000165275.9	TRMT10B	chr9	+	37769940	37770019	37768075	37768228	37770671	37770739	30,32	1,1	14,3	4,2	0.0261718	0.938,0.941	0.636,0.429	0.407	-0.29
ENSG00000165282.13	PIGO	chr9	-	35092542	35092767	35091239	35091291	35093420	35093580	9,12	1,4	11,8	0,0	0.00681501	0.818,0.6	1.0,1.0	-0.291	NA
ENSG00000165288.10	BRWD3	chrX	-	80709427	80709577	80707426	80707503	80716156	80716250	3,15	0,0	12,9	3,2	0.0102105	1.0,1.0	0.667,0.692	0.321	NA
ENSG00000165322.17	ARHGAP12	chr10	-	31817787	31817886	31814258	31814361	31820386	31820488	274286	1,9	251103	16,13	0.000994863	0.993,0.941	0.887,0.798	0.124	NA
ENSG00000165406.15	MARCH8	chr10	-	45553111	45553204	45533109	45533289	45594234	45594491	17,20	13,14	2,2	10,8	0.00681501	0.395,0.417	0.091,0.111	0.305	NA
ENSG00000165487.13	MICU2	chr13	-	21496051	21496160	21495160	21495318	21502925	21503097	231175	2,5	53,40	11,12	8.02207e-08	0.983,0.946	0.707,0.625	0.298	NA
ENSG00000165609.12	NUDT5	chr10	-	12170899	12170908	12170716	12170770	12172764	12172866	20,27	1,5	37,24	0,0	0.0383572	0.948,0.83	1.0,1.0	-0.111	NA
ENSG00000165629.19	ATP5C1	chr10	+	7806973	7807010	7802757	7802854	7807658	7807793	13041639	23,40	12551026	98206	0	0.975,0.965	0.896,0.771	0.136	-0.102
ENSG00000165630.13	PRPF18	chr10	+	13591767	13591888	13586967	13587152	13597457	13597535	23,39	29,41	21,27	59,84	0.00746975	0.284,0.322	0.151,0.138	0.158	NA
ENSG00000165699.13	TSC1	chr9	-	132904410	132904454	132903650	132903817	132905580	132906139	109108	0,2	93,54	4,7	0.00953937	1.0,0.972	0.937,0.831	0.102	NA
ENSG00000165699.13	TSC1	chr9	-	132921362	132921436	132912281	132912457	132921818	132921973	174253	1,2	212218	7,41	8.79673e-06	0.989,0.985	0.939,0.729	0.153	NA
ENSG00000165733.7	BMS1	chr10	+	42802136	42802218	42798467	42798625	42816598	42816672	145133	7,3	70,24	14,9	0.000213005	0.912,0.957	0.714,0.571	0.292	NA
ENSG00000165792.17	METTL17	chr14	+	20992540	20992622	20992123	20992205	20993117	20993191	262252	0,2	160,89	3,10	0.00126269	1.0,0.984	0.964,0.817	0.102	NA
ENSG00000165792.17	METTL17	chr14	+	20993117	20993191	20992123	20992205	20993968	20994033	95137	1,0	48,40	0,7	0.0211514	0.98,1.0	1.0,0.743	0.119	NA
ENSG00000165802.19	NSMF	chr9	-	137455238	137455307	137454390	137454443	137456410	137456486	98,81	54,78	34,13	56,54	0.00197285	0.488,0.353	0.242,0.112	0.243	-0.404
ENSG00000165806.19	CASP7	chr10	+	113691996	113692070	113679668	113679978	113697493	113697603	10,3	15,18	1,0	13,7	0.0144825	0.253,0.078	0.038,0.0	0.147	NA
ENSG00000165923.15	AGBL2	chr11	-	47699445	47699553	47692102	47692256	47704542	47704728	11,13	0,1	1,3	4,1	0.0018238	1.0,0.867	0.111,0.6	0.578	0.355
ENSG00000165923.15	AGBL2	chr11	-	47677270	47677401	47668840	47668907	47679972	47680073	12,8	4,3	2,1	0,0	0.00274063	0.6,0.571	1.0,1.0	-0.415	NA
ENSG00000165959.11	CLMN	chr14	-	95215640	95215733	95213218	95213409	95221690	95221774	284335	1,7	187,92	11,25	2.0358e-05	0.993,0.96	0.895,0.648	0.205	NA
ENSG00000166037.10	CEP57	chr11	+	95817786	95817903	95813467	95813589	95818826	95818904	157220	2,0	169133	5,16	0.0001506	0.975,1.0	0.944,0.806	0.113	NA
ENSG00000166046.10	TCP11L2	chr12	+	106304092	106304231	106302832	106302941	106311040	106311232	16,19	17,19	5,6	25,21	0.00904696	0.32,0.333	0.091,0.125	0.219	-0.239
ENSG00000166046.10	TCP11L2	chr12	+	106312292	106312434	106311040	106311232	106314357	106314468	45,49	49,59	15,6	62,66	2.32865e-07	0.315,0.293	0.108,0.043	0.228	NA
ENSG00000166164.15	BRD7	chr16	-	50323586	50323698	50321981	50322038	50325747	50325883	117174	0,3	108112	4,12	0.00412395	1.0,0.967	0.931,0.824	0.106	NA
ENSG00000166165.12	CKB	chr14	-	103520501	103520592	103520121	103520311	103521262	103521342	253325	88,94	373311	79,47	0.020437	0.59,0.634	0.702,0.768	-0.123	NA
ENSG00000166169.16	POLL	chr10	-	101585315	101585478	101584601	101584919	101587245	101587421	48,77	3,4	67,39	0,0	0.0361426	0.889,0.906	1.0,1.0	-0.103	NA
ENSG00000166181.12	API5	chr11	+	43335277	43335354	43330507	43330564	43335857	43335994	125140	0,1	111,49	1,10	0.00454277	1.0,0.986	0.982,0.71	0.147	NA
ENSG00000166348.17	USP54	chr10	-	73543017	73543131	73539443	73539593	73545537	73545672	53,67	0,1	77,50	5,6	0.00589489	1.0,0.971	0.885,0.806	0.14	NA
ENSG00000166575.16	TMEM135	chr11	+	87067693	87067821	87037891	87038186	87091361	87091395	41,58	0,0	31,24	2,3	0.041919	1.0,1.0	0.886,0.8	0.157	NA
ENSG00000166575.16	TMEM135	chr11	+	87071522	87071615	87037984	87038186	87091361	87091395	31,50	0,0	23,26	2,3	0.0309952	1.0,1.0	0.852,0.813	0.167	NA
ENSG00000166747.12	AP1G1	chr16	-	71765488	71765584	71764645	71764726	71769622	71769699	202278	0,5	278183	7,23	0.000883412	1.0,0.965	0.952,0.799	0.107	NA
ENSG00000166788.9	SAAL1	chr11	-	18083534	18083709	18081410	18081503	18086865	18086960	30,38	24,32	16,18	38,45	0.00474276	0.385,0.373	0.174,0.167	0.209	NA
ENSG00000166788.9	SAAL1	chr11	-	18083534	18083731	18081410	18081503	18086865	18087054	49,65	24,32	39,27	38,45	0.0119031	0.505,0.504	0.339,0.231	0.219	NA
ENSG00000166788.9	SAAL1	chr11	-	18083534	18083728	18081410	18081503	18086865	18087054	42,46	24,32	23,20	38,45	0.001667	0.467,0.418	0.232,0.182	0.235	NA
ENSG00000166801.15	FAM111A	chr11	+	59143496	59145856	59143082	59143304	59148835	59148953	17,23	3,2	9,1	0,0	0.0346136	0.739,0.852	1.0,1.0	-0.205	NA
ENSG00000166833.19	NAV2	chr11	+	20049835	20049901	20048727	20049195	20051288	20051333	6,3	2,10	2,1	0,0	5.14683e-05	0.616,0.138	1.0,1.0	-0.623	NA
ENSG00000166833.19	NAV2	chr11	+	20051288	20051333	20048727	20049195	20054079	20054240	4,11	8,7	0,1	4,2	0.0220912	0.24,0.498	0.0,0.24	0.249	NA
ENSG00000166881.9	NEMP1	chr12	-	57069233	57069306	57064645	57064739	57070819	57070893	20,23	8,20	13,4	26,12	0.0419557	0.561,0.37	0.203,0.145	0.292	NA
ENSG00000166887.15	VPS39	chr15	-	42191124	42191167	42187757	42187856	42191495	42191560	40,37	0,0	24,22	0,7	0.0116408	1.0,1.0	1.0,0.668	0.166	NA
ENSG00000166887.15	VPS39	chr15	-	42189113	42189208	42187757	42187856	42191495	42191560	34,24	0,0	30,24	0,7	0.0139101	1.0,1.0	1.0,0.632	0.184	NA
ENSG00000166900.14	STX3	chr11	+	59795371	59795482	59793379	59793514	59797282	59797396	84,96	2,1	47,20	5,3	0.0328845	0.955,0.98	0.825,0.769	0.171	NA
ENSG00000166987.14	MBD6	chr12	+	57526565	57527227	57525347	57526388	57527506	57527660	172171	4,16	91,43	14,19	0.00796807	0.956,0.842	0.765,0.531	0.251	-0.127
ENSG00000167106.11	FAM102A	chr9	-	127948070	127948225	127945648	127945753	127979991	127980513	388415	3,8	398210	19,22	7.64425e-05	0.985,0.963	0.913,0.827	0.104	NA
ENSG00000167110.16	GOLGA2	chr9	-	128267193	128267274	128265969	128266020	128267457	128267517	56,54	25,62	18,19	64,60	0.00078815	0.528,0.303	0.123,0.137	0.285	-0.56
ENSG00000167110.16	GOLGA2	chr9	-	128266286	128266325	128265969	128266020	128267457	128267517	532742	25,62	286194	64,60	1.24863e-10	0.934,0.888	0.748,0.682	0.196	-0.123
ENSG00000167123.18	CERCAM	chr9	+	128434101	128434229	128428929	128429036	128435652	128435905	11,12	4,2	7,4	0,0	0.00228156	0.579,0.75	1.0,1.0	-0.336	NA
ENSG00000167384.10	ZNF180	chr19	-	44485035	44485157	44484360	44484435	44497283	44497377	2,6	5,6	0,0	2,2	0.00574565	0.167,0.333	0.0,0.0	0.25	NA
ENSG00000167397.14	VKORC1	chr16	-	31093311	31093482	31090841	31091342	31094556	31094760	371522	50,91	9451031	222516	0.0199558	0.788,0.741	0.68,0.5	0.174	NA
ENSG00000167491.17	GATAD2A	chr19	+	19501968	19502043	19501120	19501416	19502330	19502526	176197	7,21	130103	31,14	0.0336007	0.927,0.825	0.679,0.787	0.143	-0.182
ENSG00000167522.14	ANKRD11	chr16	-	89291680	89291777	89291012	89291183	89305205	89305344	36,30	62,86	14,5	75109	3.30138e-05	0.225,0.149	0.085,0.022	0.134	-0.131
ENSG00000167522.14	ANKRD11	chr16	-	89286038	89286186	89275092	89275191	89288527	89288670	55,98	2,4	59,32	13,14	0.000251086	0.932,0.925	0.694,0.533	0.315	NA
ENSG00000167565.12	SERTAD3	chr19	-	40442322	40442515	40441805	40442086	40444214	40444275	39,51	44,78	12,8	88136	1.45471e-12	0.307,0.246	0.064,0.029	0.23	NA
ENSG00000167604.13	NFKBID	chr19	-	35890577	35890696	35890373	35890490	35895979	35896128	0,2	18,23	5,9	10,15	0.00131014	0.0,0.042	0.2,0.231	-0.195	NA
ENSG00000167670.15	CHAF1A	chr19	+	4418019	4418076	4408902	4409759	4422565	4422795	44,33	4,3	12,4	7,4	0.00826125	0.863,0.863	0.495,0.364	0.433	NA
ENSG00000167723.14	TRPV3	chr17	-	3535572	3535713	3532656	3532937	3542521	3542698	4,20	0,0	3,8	2,2	0.0146995	1.0,1.0	0.429,0.667	0.452	NA
ENSG00000168010.10	ATG16L2	chr11	+	72826517	72826589	72826172	72826243	72827187	72827272	38,25	1,5	43,50	0,0	0.0166765	0.951,0.72	1.0,1.0	-0.165	NA
ENSG00000168010.10	ATG16L2	chr11	+	72826702	72826823	72826172	72826243	72827187	72827272	40,38	1,5	33,38	0,0	0.0287271	0.952,0.792	1.0,1.0	-0.128	NA
ENSG00000168096.14	ANKS3	chr16	-	4726978	4727177	4726658	4726780	4729979	4730151	17,22	3,7	7,10	1,0	0.0310824	0.739,0.611	0.778,1.0	-0.214	NA
ENSG00000168137.15	SETD5	chr3	+	9434044	9434181	9433844	9433950	9434276	9434485	38,52	43,62	55,30	23,12	0.00316663	0.306,0.295	0.545,0.556	-0.25	NA
ENSG00000168137.15	SETD5	chr3	+	9433844	9433950	9428822	9429009	9434276	9434485	75,94	0,2	46,29	1,9	0.0134382	1.0,0.959	0.958,0.617	0.192	NA
ENSG00000168385.17	SEPT2	chr2	+	241324408	241324662	241324215	241324241	241325992	241326113	37,55	108,93	45,44	54,27	0.0263146	0.146,0.228	0.294,0.449	-0.184	NA
ENSG00000168447.10	SCNN1B	chr16	+	23371775	23371883	23371298	23371462	23375737	23375855	39,58	1,1	75,81	11,5	0.0294714	0.951,0.967	0.773,0.89	0.127	-0.246
ENSG00000168566.12	SNRNP48	chr6	+	7599672	7599680	7595026	7595101	7601335	7601524	32,26	18,24	20,17	35,41	0.0227466	0.619,0.498	0.343,0.275	0.249	NA
ENSG00000168743.12	NPNT	chr4	+	105958470	105958557	105942306	105942702	105959027	105959126	431499	23,21	394217	34,36	0.00500726	0.904,0.922	0.853,0.751	0.111	NA
ENSG00000168765.15	GSTM4	chr1	+	109657532	109657671	109657214	109657279	109657771	109657872	29,32	3,3	22,17	0,0	0.0291594	0.829,0.842	1.0,1.0	-0.165	NA
ENSG00000168765.15	GSTM4	chr1	+	109657589	109657671	109657214	109657279	109657771	109657872	35,41	3,3	29,17	0,0	0.0434954	0.854,0.872	1.0,1.0	-0.137	NA
ENSG00000168769.12	TET2	chr4	+	105241338	105241429	105233896	105237351	105242833	105242927	50,66	2,0	38,6	7,4	0.0012388	0.926,1.0	0.731,0.429	0.383	-0.163
ENSG00000168813.16	ZNF507	chr19	+	32347244	32347338	32345671	32345783	32352828	32354957	31,29	4,4	18,5	9,11	0.010933	0.795,0.784	0.5,0.185	0.447	NA
ENSG00000168958.19	MFF	chr2	+	227347225	227347384	227342744	227342819	227355676	227355761	13,16	4,9	20,15	1,1	0.0134382	0.619,0.471	0.909,0.882	-0.351	NA
ENSG00000168958.19	MFF	chr2	+	227352513	227352573	227342744	227342819	227355676	227355761	47,78	4,9	78,66	1,1	0.00705901	0.868,0.829	0.978,0.974	-0.127	NA
ENSG00000169057.19	MECP2	chrX	-	154092183	154092307	154032458	154032557	154097603	154097663	40,83	13,28	37,36	31,48	0.00102918	0.606,0.597	0.374,0.273	0.278	-0.299
ENSG00000169118.16	CSNK1G1	chr15	-	64259200	64259241	64251511	64251581	64300318	64300627	63,71	2,2	44,33	3,11	0.0280514	0.954,0.959	0.905,0.662	0.173	NA
ENSG00000169118.16	CSNK1G1	chr15	-	64188374	64188485	64181175	64181430	64203081	64203189	24,14	0,1	18,8	1,5	0.0329853	1.0,0.875	0.9,0.444	0.265	NA
ENSG00000169255.13	B3GALNT1	chr3	-	161103112	161103205	161090038	161090062	161103426	161103517	12,21	6,2	17,5	0,0	0.00151556	0.5,0.84	1.0,1.0	-0.33	NA
ENSG00000169255.13	B3GALNT1	chr3	-	161101138	161101233	161089943	161090062	161103426	161103514	29,28	6,2	33,11	0,0	0.0035415	0.707,0.875	1.0,1.0	-0.209	NA
ENSG00000169359.13	SLC33A1	chr3	-	155842431	155842619	155833856	155834041	155853222	155854429	56,66	1,1	51,18	7,6	0.00123581	0.966,0.971	0.785,0.6	0.276	NA
ENSG00000169398.19	PTK2	chr8	-	140925660	140925749	140890542	140890769	141001124	141001313	122127	51,51	117,79	86143	0.00485813	0.545,0.555	0.405,0.216	0.24	-0.215
ENSG00000169398.19	PTK2	chr8	-	140925561	140925749	140890542	140890769	141001124	141001266	37,39	51,51	46,33	86143	0.0428647	0.266,0.277	0.211,0.103	0.115	NA
ENSG00000169592.14	INO80E	chr16	+	30001464	30001530	30000928	30001040	30005220	30005577	70,97	102,96	65,35	158165	6.76964e-05	0.269,0.351	0.181,0.102	0.169	NA
ENSG00000169592.14	INO80E	chr16	+	30001211	30001530	30000928	30001040	30005220	30005323	128171	102,96	118102	158165	0.000428895	0.386,0.471	0.272,0.236	0.174	NA
ENSG00000169592.14	INO80E	chr16	+	30001413	30001530	30000928	30001040	30005220	30005793	425546	102,96	393212	158165	0.00053281	0.676,0.74	0.554,0.391	0.235	NA
ENSG00000169660.15	HEXDC	chr17	+	82428029	82428127	82424426	82424503	82428557	82428645	6,7	27,28	0,0	17,5	0.00954378	0.1,0.111	0.0,0.0	0.106	NA
ENSG00000169689.14	STRA13	chr17	-	82019640	82019694	82019292	82019381	82019857	82019909	45,53	91,75	81116	68,83	0.00265663	0.225,0.293	0.411,0.45	-0.171	-0.253
ENSG00000169738.7	DCXR	chr17	-	82036413	82036448	82036283	82036308	82036543	82036581	12,28	8,8	14,12	0,2	0.0324605	0.508,0.707	1.0,0.805	-0.295	NA
ENSG00000169764.14	UGP2	chr2	+	63842538	63842599	63841856	63842204	63856305	63856433	29,37	44,65	23,9	98,77	0.000302842	0.268,0.24	0.115,0.061	0.166	NA
ENSG00000169862.18	CTNND2	chr5	-	11083880	11083955	11082695	11082846	11098574	11098748	24,23	22,18	13,5	30,13	0.0492074	0.354,0.391	0.179,0.162	0.202	NA
ENSG00000170364.12	SETMAR	chr3	+	4313646	4313761	4303607	4303868	4316211	4317265	30,23	4,2	8,5	0,0	0.0294714	0.789,0.852	1.0,1.0	-0.179	NA
ENSG00000170379.19	TCAF2	chr7	+	143702980	143703617	143620949	143621020	143719682	143720674	28,24	0,1	23,8	8,4	0.0001506	1.0,0.923	0.59,0.5	0.417	NA
ENSG00000170445.12	HARS	chr5	-	140683545	140683667	140683099	140683219	140690854	140690944	4,3	48,33	9,5	20,11	0.0224668	0.04,0.043	0.184,0.185	-0.143	NA
ENSG00000170502.12	NUDT9	chr4	+	87438276	87438372	87434980	87435220	87441828	87441915	98112	0,0	124,97	2,10	0.00314953	1.0,1.0	0.969,0.829	0.101	NA
ENSG00000170632.13	ARMC10	chr7	+	103092476	103092653	103086629	103086764	103097276	103097348	488562	73,81	521444	41,25	0.0011339	0.77,0.776	0.864,0.899	-0.108	NA
ENSG00000170632.13	ARMC10	chr7	+	103086868	103086937	103086629	103086764	103098298	103098863	32,22	8,8	6,6	26,13	1.96536e-06	0.677,0.591	0.108,0.195	0.483	NA
ENSG00000170776.19	AKAP13	chr15	+	85658536	85658590	85655416	85655787	85664562	85664755	45,57	16,22	23,6	31,26	0.000136504	0.622,0.603	0.303,0.119	0.402	NA
ENSG00000170832.12	USP32	chr17	-	60212023	60212098	60211375	60211514	60213580	60213662	620747	14,56	403124	286395	0	0.957,0.87	0.415,0.136	0.638	-0.412
ENSG00000170919.15	TPT1-AS1	chr13	+	45390757	45390902	45389734	45389820	45391031	45391157	91,63	3,5	52,31	0,0	0.0331364	0.938,0.863	1.0,1.0	-0.1	NA
ENSG00000170921.14	TANC2	chr17	+	63418306	63418407	63415527	63415674	63419998	63422356	679907	56,99	902407	161119	0.0001506	0.858,0.821	0.737,0.631	0.155	-0.136
ENSG00000170949.17	ZNF160	chr19	-	53091412	53091497	53086261	53086321	53091636	53091720	67115	42,47	87122	14,3	4.38808e-05	0.444,0.55	0.757,0.953	-0.358	NA
ENSG00000170949.17	ZNF160	chr19	-	53091412	53091553	53086261	53086321	53091636	53091720	72127	42,47	94129	14,3	3.87366e-05	0.462,0.575	0.77,0.956	-0.345	NA
ENSG00000170949.17	ZNF160	chr19	-	53091412	53091529	53086261	53086321	53091636	53091720	89149	42,47	114160	14,3	5.99509e-06	0.514,0.613	0.803,0.964	-0.32	NA
ENSG00000171103.10	TRMT61B	chr2	-	28861117	28861308	28852407	28852499	28869578	28870301	21,22	4,1	9,2	4,6	0.0379943	0.724,0.917	0.529,0.143	0.484	NA
ENSG00000171163.15	ZNF692	chr1	-	248857827	248858017	248857233	248857497	248858130	248858321	12,14	1,4	11,13	0,0	0.0112368	0.857,0.636	1.0,1.0	-0.254	NA
ENSG00000171163.15	ZNF692	chr1	-	248857827	248858034	248857468	248857497	248858130	248858321	12,14	1,4	10,13	0,0	0.0112459	0.857,0.636	1.0,1.0	-0.254	NA
ENSG00000171163.15	ZNF692	chr1	-	248857827	248857859	248857233	248857497	248858130	248858321	15,13	1,4	18,12	0,0	0.0310837	0.914,0.697	1.0,1.0	-0.195	NA
ENSG00000171202.6	TMEM126A	chr11	+	85650248	85650341	85647966	85648089	85654062	85654234	150173	6,5	176157	22,48	5.99374e-05	0.926,0.945	0.8,0.621	0.225	NA
ENSG00000171202.6	TMEM126A	chr11	+	85650311	85650341	85648020	85648089	85654062	85654256	50,51	6,5	58,44	22,48	0.00131779	0.857,0.88	0.655,0.398	0.342	NA
ENSG00000171204.12	TMEM126B	chr11	+	85629131	85629262	85628592	85628688	85631144	85631316	7,7	19,20	2,0	19,16	0.0160674	0.156,0.149	0.05,0.0	0.128	NA
ENSG00000171617.13	ENC1	chr5	-	74637564	74637701	74634683	74636498	74640306	74641424	12,28	15,21	10,7	30,37	0.00323504	0.286,0.4	0.143,0.086	0.228	NA
ENSG00000171634.16	BPTF	chr17	+	67886127	67886316	67874919	67875020	67891843	67891962	134156	86,93	170120	26,12	1.47884e-10	0.438,0.456	0.766,0.833	-0.352	NA
ENSG00000171634.16	BPTF	chr17	+	67875555	67875744	67874816	67875020	67891843	67892034	167260	86,93	317250	26,12	0	0.493,0.583	0.859,0.912	-0.347	NA
ENSG00000171634.16	BPTF	chr17	+	67875555	67875744	67874816	67875020	67886127	67886316	153213	35,51	326246	15,6	5.65423e-11	0.686,0.676	0.916,0.953	-0.253	NA
ENSG00000171634.16	BPTF	chr17	+	67963332	67963506	67959540	67959875	67964211	67964404	267290	82,68	191,50	19,5	0.00136188	0.619,0.681	0.834,0.833	-0.183	NA
ENSG00000171700.13	RGS19	chr20	-	64076856	64076954	64076524	64076646	64079872	64079988	16,19	4,3	4,1	0,0	0.00567475	0.667,0.76	1.0,1.0	-0.286	NA
ENSG00000171729.13	TMEM51	chr1	+	15210489	15210562	15153767	15153954	15214894	15215431	14,16	1,0	25,6	2,4	0.0368407	0.877,1.0	0.864,0.434	0.289	-0.606
ENSG00000171729.13	TMEM51	chr1	+	15214894	15215431	15153732	15153954	15219325	15220339	26,15	1,0	30,28	3,6	0.0170152	0.929,1.0	0.833,0.7	0.198	NA
ENSG00000171824.13	EXOSC10	chr1	-	11079710	11079822	11077600	11077651	11080498	11080549	172181	0,0	131,79	3,9	0.000666278	1.0,1.0	0.956,0.814	0.115	NA
ENSG00000171843.15	MLLT3	chr9	-	20354807	20354879	20345076	20346574	20360741	20360841	167254	5,9	225192	14,36	0.00696006	0.945,0.935	0.892,0.733	0.127	-0.111
ENSG00000172239.13	PAIP1	chr5	-	43533737	43533792	43529785	43529879	43534852	43534970	247232	3,0	211181	9,21	6.3375e-06	0.98,1.0	0.932,0.834	0.107	NA
ENSG00000172244.8	C5orf34	chr5	-	43509144	43509375	43508576	43508666	43514805	43515145	12,21	0,0	20,25	0,6	0.0191364	1.0,1.0	1.0,0.676	0.162	NA
ENSG00000172264.16	MACROD2	chr20	+	15885763	15885811	15862744	15862826	15933275	15933338	28,25	6,7	3,4	0,0	0.00515324	0.742,0.687	1.0,1.0	-0.285	NA
ENSG00000172269.16	DPAGT1	chr11	-	119101017	119101047	119100628	119100843	119101494	119101832	33,49	6,5	56,37	0,2	0.0219399	0.799,0.876	1.0,0.93	-0.128	NA
ENSG00000172500.12	FIBP	chr11	-	65886321	65886422	65885529	65885663	65887599	65887726	221250	3,11	190174	14,21	0.00685574	0.974,0.919	0.872,0.806	0.108	-0.104
ENSG00000172869.14	DMXL1	chr5	+	119238988	119239080	119237321	119237414	119240418	119240471	139142	4,6	77,23	10,6	0.0170719	0.946,0.922	0.794,0.657	0.208	-0.257
ENSG00000172888.11	ZNF621	chr3	+	40529318	40529445	40525778	40525864	40530208	40530316	25,26	2,7	16,4	0,0	0.0031564	0.862,0.65	1.0,1.0	-0.244	NA
ENSG00000172939.8	OXSR1	chr3	+	38242742	38242778	38236660	38236961	38246074	38246221	71120	3,11	63,25	11,15	0.0234938	0.942,0.881	0.796,0.532	0.247	-0.14
ENSG00000172939.8	OXSR1	chr3	+	38230364	38230430	38224570	38224704	38236838	38236961	131138	0,0	95,35	4,7	0.00036319	1.0,1.0	0.927,0.728	0.172	NA
ENSG00000173041.11	ZNF680	chr7	-	64543706	64543802	64519883	64522500	64562924	64563022	16,27	2,8	5,3	6,5	0.0263837	0.8,0.628	0.294,0.231	0.451	NA
ENSG00000173276.13	ZBTB21	chr21	-	42002896	42002961	41986830	41994108	42010251	42010366	5,3	9,15	0,1	31,13	0.0118398	0.231,0.097	0.0,0.04	0.144	NA
ENSG00000173517.10	PEAK1	chr15	-	77365162	77365225	77286422	77286504	77420005	77420100	19,17	1,3	8,4	4,11	0.0103365	0.912,0.756	0.523,0.166	0.49	NA
ENSG00000173575.18	CHD2	chr15	+	92944414	92944515	92942842	92943068	92945820	92945865	252327	0,3	361228	4,37	8.96433e-05	1.0,0.982	0.978,0.755	0.124	NA
ENSG00000173611.17	SCAI	chr9	-	125065989	125066058	125055875	125056007	125142632	125142677	26,15	29,50	8,6	42,50	0.0260309	0.32,0.136	0.091,0.059	0.153	NA
ENSG00000173681.16	CXorf23	chrX	-	19929784	19929940	19916257	19917334	19935808	19935898	46,46	3,5	15,10	0,0	0.0168019	0.885,0.821	1.0,1.0	-0.147	NA
ENSG00000173692.12	PSMD1	chr2	+	231163634	231163727	231161339	231161509	231165199	231165286	87100	1,0	68,39	2,7	0.00573826	0.978,1.0	0.944,0.736	0.149	NA
ENSG00000173715.15	C11orf80	chr11	+	66796280	66796364	66788159	66788269	66800640	66800696	227272	6,12	131112	16,21	0.000220613	0.95,0.919	0.804,0.727	0.169	NA
ENSG00000173726.10	TOMM20	chr1	-	235119338	235119406	235113767	235113910	235119817	235119899	93139	149186	59,51	243242	2.30365e-08	0.248,0.283	0.114,0.1	0.158	0.248
ENSG00000173818.16	ENDOV	chr17	+	80421827	80421962	80415668	80415821	80422205	80422245	27,42	66,75	31,44	23,25	0.000410461	0.17,0.219	0.403,0.468	-0.241	NA
ENSG00000173818.16	ENDOV	chr17	+	80417780	80417945	80415649	80415821	80423519	80423632	1,5	5,7	0,0	2,4	0.0153903	0.091,0.263	0.0,0.0	0.177	NA
ENSG00000173852.13	DPY19L1	chr7	-	34957983	34958070	34955307	34955367	34966893	34966971	19,14	1,2	5,4	4,3	0.0261718	0.905,0.778	0.385,0.4	0.449	NA
ENSG00000173960.12	UBXN2A	chr2	+	23958300	23958355	23940418	23940648	23971275	23971414	58,61	5,4	27,22	7,11	0.0134836	0.871,0.899	0.692,0.538	0.27	NA
ENSG00000174032.16	SLC25A30	chr13	-	45408926	45409074	45405882	45405977	45411361	45411480	35,55	0,1	65,78	6,9	0.00341758	1.0,0.965	0.844,0.813	0.154	NA
ENSG00000174586.10	ZNF497	chr19	-	58357951	58358286	58357438	58357649	58358488	58358585	2,9	4,6	4,2	1,0	0.0259648	0.2,0.429	0.667,1.0	-0.519	NA
ENSG00000174606.12	ANGEL2	chr1	-	213000785	213000912	213000325	213000383	213005032	213005454	21,10	0,1	7,3	4,3	0.000826248	1.0,0.833	0.467,0.333	0.516	NA
ENSG00000174799.10	CEP135	chr4	+	55980142	55980295	55971269	55971408	55981226	55981379	12,13	0,0	12,15	1,4	0.0121957	1.0,1.0	0.857,0.652	0.246	NA
ENSG00000174945.13	AMZ1	chr7	+	2709074	2709244	2708587	2708716	2709639	2709816	35,43	12,18	43,43	6,1	0.00871877	0.593,0.544	0.782,0.956	-0.3	NA
ENSG00000175054.14	ATR	chr3	-	142450465	142450602	142449236	142449602	142453127	142453233	3,6	16,12	0,0	19,2	0.00864982	0.086,0.2	0.0,0.0	0.143	NA
ENSG00000175198.14	PCCA	chr13	+	100515426	100515567	100449251	100449305	100527674	100527752	29,36	1,1	22,13	4,5	0.0156249	0.935,0.947	0.733,0.565	0.292	0.206
ENSG00000175224.16	ATG13	chr11	+	46618259	46618375	46617790	46617890	46630044	46630100	99116	18,22	112109	7,8	0.0241665	0.733,0.725	0.889,0.872	-0.152	NA
ENSG00000175309.14	PHYKPL	chr5	-	178215275	178215430	178214795	178214885	178222354	178222580	162191	14,9	114102	1,0	0.000474446	0.853,0.914	0.983,1.0	-0.108	NA
ENSG00000175322.11	ZNF519	chr18	-	14080188	14080266	14078199	14078298	14084876	14085076	6,3	12,7	0,0	6,3	0.00708394	0.2,0.176	0.0,0.0	0.188	NA
ENSG00000175348.10	TMEM9B	chr11	-	8962091	8962183	8956189	8956298	8964208	8964773	40,64	0,0	68,47	2,5	0.0234273	1.0,1.0	0.944,0.825	0.116	NA
ENSG00000175455.14	CCDC14	chr3	-	123955842	123956795	123948895	123949132	123961143	123961349	50,36	0,0	26,21	4,5	0.000214783	1.0,1.0	0.765,0.677	0.279	NA
ENSG00000175455.14	CCDC14	chr3	-	123955842	123955965	123948895	123949132	123961143	123961381	36,31	0,0	18,11	4,5	5.8321e-05	1.0,1.0	0.692,0.524	0.392	NA
ENSG00000175575.12	PAAF1	chr11	+	73887039	73887099	73878782	73878819	73887353	73887457	0,1	9,11	7,4	5,9	0.00265474	0.0,0.048	0.439,0.199	-0.295	NA
ENSG00000175575.12	PAAF1	chr11	+	73887030	73887099	73878778	73878819	73887353	73887457	0,1	9,11	7,4	5,9	0.00278048	0.0,0.046	0.423,0.189	-0.283	NA
ENSG00000175575.12	PAAF1	chr11	+	73886928	73887099	73878778	73878819	73887353	73887457	0,2	9,11	8,4	5,9	0.0169034	0.0,0.083	0.444,0.182	-0.272	NA
ENSG00000175611.11	LINC00476	chr9	-	95874508	95874622	95870283	95870441	95874979	95875976	0,1	10,14	3,6	18,12	0.0306051	0.0,0.034	0.077,0.2	-0.122	NA
ENSG00000175782.9	SLC35E3	chr12	+	68747929	68748040	68746105	68746779	68752031	68752190	101103	1,0	63,23	2,6	0.0055481	0.981,1.0	0.94,0.657	0.192	NA
ENSG00000175866.15	BAIAP2	chr17	+	81110913	81110959	81108474	81108509	81115769	81116224	41,27	11,15	9,8	10,19	0.0181861	0.7,0.529	0.36,0.208	0.331	NA
ENSG00000176124.11	DLEU1	chr13	+	50083141	50083194	50082170	50082557	50104703	50107218	24,32	6,8	23,30	22,45	0.00035203	0.703,0.703	0.382,0.282	0.371	NA
ENSG00000176444.18	CLK2	chr1	-	155268707	155268792	155268292	155268359	155269487	155269716	59100	23,12	134144	8,0	0.000439265	0.562,0.806	0.893,1.0	-0.262	NA
ENSG00000176444.18	CLK2	chr1	-	155268707	155268795	155268292	155268359	155269487	155269713	82112	23,12	161190	8,0	6.24524e-05	0.641,0.824	0.91,1.0	-0.223	NA
ENSG00000176623.11	RMDN1	chr8	-	86494828	86494966	86488551	86488639	86506994	86507112	100179	273318	92,83	87116	0.0110147	0.155,0.22	0.346,0.263	-0.117	0.128
ENSG00000176783.14	RUFY1	chr5	+	179580946	179581012	179577074	179577136	179585795	179585865	115102	0,1	58,19	5,9	4.72001e-05	1.0,0.982	0.861,0.531	0.295	NA
ENSG00000177150.12	FAM210A	chr18	-	13681604	13682105	13671861	13671973	13726328	13726586	111121	2,4	157169	9,26	0.0113393	0.965,0.938	0.897,0.765	0.121	NA
ENSG00000177150.12	FAM210A	chr18	-	13671861	13671973	13663346	13666713	13726328	13726586	49,81	9,15	85112	34,85	0.00717516	0.731,0.73	0.556,0.397	0.254	NA
ENSG00000177150.12	FAM210A	chr18	-	13681604	13682105	13666002	13666713	13726328	13726586	77,92	9,15	100137	34,85	0.00175537	0.811,0.754	0.595,0.446	0.262	NA
ENSG00000177706.8	FAM20C	chr7	+	208897	208976	195553	195732	246414	246507	88,87	0,0	94,33	3,5	0.00770265	1.0,1.0	0.94,0.767	0.147	NA
ENSG00000177731.15	FLII	chr17	-	18256525	18256597	18255182	18255263	18256908	18257019	257252	0,0	225172	4,26	2.00213e-06	1.0,1.0	0.967,0.773	0.13	NA
ENSG00000177853.14	ZNF518A	chr10	+	96151415	96151566	96133555	96133648	96155325	96155398	9,12	2,4	2,0	7,1	0.00242451	0.692,0.6	0.125,0.0	0.583	NA
ENSG00000178150.8	ZNF114	chr19	+	48281551	48281689	48279730	48279808	48282370	48282497	7,11	9,6	6,4	0,0	0.000104636	0.28,0.478	1.0,1.0	-0.621	NA
ENSG00000178295.14	GEN1	chr2	+	17768737	17768811	17766578	17766689	17772633	17772784	30,25	0,1	11,4	3,3	0.00194366	1.0,0.927	0.65,0.403	0.437	NA
ENSG00000178449.8	COX14	chr12	+	50118492	50118552	50112203	50112301	50120035	50120457	25,17	60,65	12,11	110155	0.000338429	0.189,0.128	0.058,0.038	0.111	NA
ENSG00000178950.16	GAK	chr4	-	896459	896549	893873	894009	898032	898158	121106	0,7	94,48	11,19	0.00180774	1.0,0.883	0.81,0.558	0.257	NA
ENSG00000178971.13	CTC1	chr17	-	8229141	8229206	8228502	8228629	8229301	8229446	32,49	5,3	33,18	0,0	0.00867709	0.775,0.898	1.0,1.0	-0.163	NA
ENSG00000178971.13	CTC1	chr17	-	8228726	8228892	8228502	8228629	8229301	8229446	46,36	5,3	44,27	0,0	0.00708394	0.821,0.857	1.0,1.0	-0.161	NA
ENSG00000179950.13	PUF60	chr8	-	143820665	143820716	143818372	143818534	143821596	143821686	52,31	45,66	20,12	71,71	0.00724608	0.409,0.22	0.145,0.092	0.196	-0.281
ENSG00000180098.9	TRNAU1AP	chr1	+	28574588	28574718	28571866	28571900	28577499	28577775	62,90	93,69	88105	46,24	0.0174297	0.25,0.395	0.489,0.686	-0.265	0.106
ENSG00000180098.9	TRNAU1AP	chr1	+	28561112	28561260	28560632	28560732	28561345	28561398	54,91	38,46	85,75	18,23	0.024669	0.415,0.497	0.702,0.62	-0.205	0.285
ENSG00000180530.9	NRIP1	chr21	-	15014343	15014466	14961234	14968526	15043494	15043574	98,80	15,14	22,11	20,9	7.46557e-05	0.766,0.741	0.355,0.379	0.387	-0.144
ENSG00000180530.9	NRIP1	chr21	-	15043494	15043574	14961234	14968526	15064744	15064805	35,37	5,1	30,11	8,9	0.0445119	0.778,0.949	0.652,0.379	0.348	NA
ENSG00000180530.9	NRIP1	chr21	-	15014343	15014466	14961234	14968526	15064744	15065000	69,58	5,1	16,8	8,9	2.37428e-05	0.873,0.967	0.5,0.308	0.516	NA
ENSG00000180747.15	SMG1P3	chr16	-	21487577	21487616	21484371	21484535	21519827	21520179	13,27	10,11	13,3	21,14	0.0294714	0.463,0.62	0.291,0.125	0.334	NA
ENSG00000180776.15	ZDHHC20	chr13	-	21421060	21421164	21391721	21391854	21459053	21459370	10,10	0,0	14,15	0,5	0.0379979	1.0,1.0	1.0,0.6	0.2	0.236
ENSG00000180776.15	ZDHHC20	chr13	-	21413651	21413772	21391721	21391854	21459053	21459370	10,29	0,0	18,19	0,5	0.0463865	1.0,1.0	1.0,0.655	0.172	0.339
ENSG00000180902.16	D2HGDH	chr2	+	241748864	241749929	241744708	241744877	241750150	241750294	15,6	94,89	13,16	62,29	0.0467472	0.074,0.033	0.095,0.216	-0.102	NA
ENSG00000181019.12	NQO1	chr16	-	69714963	69715077	69713027	69713129	69718122	69718253	27332997	159190	19181219	209232	2.92624e-06	0.896,0.887	0.821,0.724	0.119	NA
ENSG00000181135.15	ZNF707	chr8	+	143689203	143689301	143684480	143684542	143690056	143690123	20,11	0,0	13,23	6,0	0.0290962	1.0,1.0	0.52,1.0	0.24	NA
ENSG00000181392.14	SYNE4	chr19	-	36008216	36008367	36006749	36006944	36008553	36008793	25,22	3,6	34,30	1,1	0.0436753	0.806,0.647	0.944,0.938	-0.214	-0.214
ENSG00000181666.17	HKR1	chr19	+	37324795	37324936	37324207	37324265	37347189	37347316	20,16	3,2	9,5	0,0	0.0353203	0.769,0.8	1.0,1.0	-0.216	NA
ENSG00000181666.17	HKR1	chr19	+	37357961	37358039	37347776	37347872	37362105	37362296	2,6	6,13	0,0	12,1	0.0112095	0.143,0.188	0.0,0.0	0.165	NA
ENSG00000181751.9	C5orf30	chr5	+	103265907	103265997	103258701	103258896	103275896	103277228	79,81	0,3	108,87	5,28	0.00633828	1.0,0.931	0.915,0.608	0.204	NA
ENSG00000182087.12	TMEM259	chr19	-	1010990	1011095	1009647	1010895	1011366	1011499	6,8	18,20	25,55	32,46	0.0489658	0.143,0.167	0.281,0.374	-0.173	NA
ENSG00000182446.13	NPLOC4	chr17	-	81563412	81563568	81559315	81559416	81565504	81565607	1,1	46,50	8,10	37,12	9.33355e-05	0.011,0.01	0.098,0.294	-0.185	NA
ENSG00000182473.21	EXOC7	chr17	-	76090328	76090397	76089174	76089320	76094413	76094581	47,56	99143	7,3	63,39	0.000146431	0.199,0.17	0.055,0.039	0.138	-0.554
ENSG00000182628.12	SKA2	chr17	-	59119318	59119495	59111887	59112345	59155130	59155184	409467	19,42	195162	23,45	0.00992236	0.915,0.848	0.809,0.643	0.155	NA
ENSG00000182628.12	SKA2	chr17	-	59131280	59131367	59112046	59112345	59155130	59155174	279310	19,42	120128	23,45	0.00956733	0.88,0.787	0.723,0.587	0.178	NA
ENSG00000182628.12	SKA2	chr17	-	59131280	59131367	59119386	59119495	59155130	59155174	136113	4,3	64,36	5,9	0.0264947	0.944,0.95	0.865,0.667	0.181	NA
ENSG00000182628.12	SKA2	chr17	-	59131280	59131367	59112046	59112345	59154955	59155194	316360	34,58	158170	70155	2.89631e-07	0.823,0.756	0.53,0.354	0.347	NA
ENSG00000182628.12	SKA2	chr17	-	59119318	59119495	59111887	59112345	59154955	59155177	409473	34,58	197160	70155	7.32764e-06	0.857,0.803	0.585,0.34	0.368	NA
ENSG00000182796.12	TMEM198B	chr12	+	55832870	55833014	55831256	55831349	55833446	55833541	12,8	4,2	3,2	0,0	0.00314752	0.6,0.667	1.0,1.0	-0.367	NA
ENSG00000182872.15	RBM10	chrX	+	47171027	47171258	47169314	47169498	47173127	47173197	67,87	27,24	69,45	9,5	0.0350716	0.554,0.644	0.793,0.818	-0.207	NA
ENSG00000183036.10	PCP4	chr21	+	39916065	39916186	39898475	39898527	39928983	39929397	5,2	10,9	0,3	53,34	0.0292877	0.2,0.1	0.0,0.042	0.129	NA
ENSG00000183137.14	CEP57L1	chr6	+	109155790	109155877	109155229	109155307	109159024	109159102	23,25	0,1	17,6	3,6	0.00156728	1.0,0.926	0.739,0.333	0.427	NA
ENSG00000183150.7	GPR19	chr12	-	12688512	12688932	12684397	12684507	12695458	12695511	1,0	12,9	3,2	4,0	0.0331464	0.04,0.0	0.273,1.0	-0.617	NA
ENSG00000183250.11	LINC01547	chr21	-	44937538	44937682	44935626	44935890	44939592	44939845	5,2	3,9	0,0	2,2	0.0140324	0.455,0.1	0.0,0.0	0.278	-0.209
ENSG00000183291.15	SEP15	chr1	-	86880661	86880725	86862724	86863605	86903280	86903448	205260	0,2	257279	10,44	1.3361e-07	1.0,0.986	0.933,0.775	0.139	NA
ENSG00000183291.15	SEP15	chr1	-	86868052	86868102	86862446	86863605	86903280	86903448	123129	0,2	110129	10,44	3.25289e-07	1.0,0.975	0.869,0.639	0.234	NA
ENSG00000183317.16	EPHA10	chr1	-	37722005	37722296	37721659	37721845	37723040	37723166	0,0	4,6	3,2	1,0	4.94678e-05	0.0,0.0	0.6,1.0	-0.8	NA
ENSG00000183323.12	CCDC125	chr5	-	69292187	69292362	69285336	69285467	69294792	69294900	94,75	9,10	25,11	11,13	0.00176805	0.839,0.789	0.532,0.297	0.4	NA
ENSG00000183337.16	BCOR	chrX	-	40071636	40071690	40070972	40071159	40072348	40075180	75106	16,23	27,5	51,54	0	0.733,0.73	0.237,0.051	0.588	NA
ENSG00000183354.11	KIAA2026	chr9	-	5944870	5944960	5929043	5929159	5954015	5954095	17,23	4,4	8,4	0,0	0.00413159	0.68,0.742	1.0,1.0	-0.289	NA
ENSG00000183431.11	SF3A3	chr1	-	37976883	37976953	37969570	37969735	37979464	37979533	134135	1,1	69,26	3,5	0.00948402	0.986,0.986	0.923,0.73	0.159	NA
ENSG00000183495.13	EP400	chr12	+	131994866	131994956	131992172	131992230	132005076	132005184	98113	2,1	74,14	12,5	9.44606e-05	0.961,0.983	0.755,0.583	0.303	NA
ENSG00000183495.13	EP400	chr12	+	132043644	132043728	132043303	132043462	132044176	132044311	81111	0,1	61,30	15,24	1.3136e-09	1.0,0.982	0.67,0.385	0.463	NA
ENSG00000183742.12	MACC1	chr7	-	20170713	20170778	20161747	20161870	20217298	20217390	7,8	7,14	3,0	9,26	0.00784151	0.35,0.236	0.152,0.0	0.217	NA
ENSG00000183943.5	PRKX	chrX	-	3611221	3611334	3608624	3608945	3612176	3612281	30,38	13,17	33,23	3,2	0.00764905	0.536,0.528	0.846,0.852	-0.317	0.523
ENSG00000184014.7	DENND5A	chr11	-	9143402	9143485	9142721	9142845	9144096	9144278	113146	3,9	84,87	11,16	0.0126486	0.95,0.89	0.792,0.731	0.158	NA
ENSG00000184677.16	ZBTB40	chr1	+	22508000	22508137	22506048	22506241	22508529	22508731	58,72	0,0	55,25	0,10	0.00948714	1.0,1.0	1.0,0.556	0.222	NA
ENSG00000184743.12	ATL3	chr11	-	63671289	63671411	63659037	63659252	63671635	63671921	34,34	0,2	25,44	7,7	0.00819385	1.0,0.895	0.641,0.759	0.248	NA
ENSG00000184867.13	ARMCX2	chrX	-	101659418	101659501	101659075	101659148	101659757	101659891	28,36	0,2	24,9	2,7	0.0333636	1.0,0.9	0.857,0.391	0.326	NA
ENSG00000184867.13	ARMCX2	chrX	-	101659407	101659501	101659075	101659148	101659757	101659835	15,21	0,2	9,8	2,7	0.0193508	1.0,0.84	0.692,0.364	0.392	NA
ENSG00000185728.16	YTHDF3	chr8	+	63175330	63175416	63169386	63169411	63186146	63187745	85,91	0,5	92,63	8,22	0.00492853	1.0,0.901	0.852,0.589	0.23	NA
ENSG00000185728.16	YTHDF3	chr8	+	63175336	63175416	63169386	63169411	63186146	63187745	56,62	0,5	51,47	8,22	0.00463979	1.0,0.861	0.761,0.516	0.292	NA
ENSG00000185753.12	CXorf38	chrX	-	40647006	40647141	40639008	40639128	40647304	40647547	48,58	0,9	72,66	1,0	0.0187407	1.0,0.763	0.973,1.0	-0.105	NA
ENSG00000186174.12	BCL9L	chr11	-	118918825	118918879	118908416	118908655	118925237	118925453	171236	28,60	248120	102132	0.00955376	0.782,0.697	0.588,0.348	0.272	NA
ENSG00000186174.12	BCL9L	chr11	-	118909913	118910015	118908416	118908655	118925237	118925453	140201	28,60	188,76	102132	0.0035338	0.714,0.626	0.48,0.224	0.318	NA
ENSG00000186480.12	INSIG1	chr7	+	155303824	155303895	155302746	155302846	155308240	155308960	120105	207304	52,27	441727	0	0.231,0.152	0.057,0.019	0.153	NA
ENSG00000186577.11	C6orf1	chr6	-	34247466	34247492	34247043	34247149	34247740	34247864	12,29	0,0	25,17	4,4	0.00404506	1.0,1.0	0.824,0.761	0.208	NA
ENSG00000186868.15	MAPT	chr17	+	45989877	45990075	45987039	45987095	45991459	45991586	42,78	94122	100,93	100,87	0.0150953	0.183,0.242	0.333,0.348	-0.128	NA
ENSG00000186871.6	ERCC6L	chrX	-	72237830	72237948	72204656	72208698	72238843	72239027	1,4	4,6	0,0	11,4	0.0462711	0.111,0.25	0.0,0.0	0.18	NA
ENSG00000186908.14	ZDHHC17	chr12	+	76826907	76827050	76822405	76822531	76828389	76828490	64,69	0,1	79,19	4,3	0.031513	1.0,0.972	0.908,0.76	0.152	NA
ENSG00000186973.10	FAM183A	chr1	+	43152827	43152979	43150760	43150820	43156205	43156279	12,8	2,3	7,1	0,0	0.00554259	0.75,0.571	1.0,1.0	-0.34	-0.433
ENSG00000186973.10	FAM183A	chr1	+	43152827	43152931	43150760	43150820	43156205	43156396	29,18	2,3	13,5	0,0	0.0450501	0.879,0.75	1.0,1.0	-0.185	-0.362
ENSG00000187118.12	CMC1	chr3	+	28263290	28263380	28241583	28241812	28316332	28316423	126199	32,42	151142	71149	0.00192355	0.663,0.703	0.515,0.323	0.264	NA
ENSG00000187172.15	BAGE2	chr21	+	10482739	10482859	10473027	10473729	10485617	10485734	10,4	5,10	0,0	6,2	0.00169079	0.5,0.167	0.0,0.0	0.334	NA
ENSG00000187239.16	FNBP1	chr9	-	129923843	129924026	129908889	129908999	129924959	129925157	156255	18,48	104,56	32,22	0.0312176	0.813,0.726	0.619,0.56	0.18	NA
ENSG00000187634.10	SAMD11	chr1	+	941143	941306	939271	939460	942135	942251	16,20	5,5	11,5	1,0	0.024745	0.615,0.667	0.846,1.0	-0.282	NA
ENSG00000187954.12	CYHR1	chr8	-	144464459	144464612	144453221	144453460	144464808	144465035	79,74	1,0	56,43	6,2	0.0125161	0.975,1.0	0.824,0.915	0.118	NA
ENSG00000188033.9	ZNF490	chr19	-	12609869	12609974	12609157	12609202	12610563	12610803	16,34	7,11	3,5	5,10	0.0146119	0.533,0.607	0.231,0.2	0.355	NA
ENSG00000188266.13	HYKK	chr15	+	78518587	78518773	78514967	78515107	78527379	78528801	9,4	15,14	7,14	3,6	0.0215634	0.231,0.125	0.538,0.538	-0.36	NA
ENSG00000188313.12	PLSCR1	chr3	-	146520165	146520180	146517011	146517167	146521543	146521712	3,0	66,46	7,1	15,18	0.0333636	0.037,0.0	0.282,0.045	-0.145	NA
ENSG00000188428.17	BLOC1S5	chr6	-	8026366	8026425	8015656	8015828	8041138	8041268	80113	6,7	137,83	17,34	0.0353903	0.883,0.901	0.82,0.579	0.193	NA
ENSG00000188559.13	RALGAPA2	chr20	-	20637362	20637501	20635350	20635617	20639784	20639900	66,56	26,37	24,10	32,25	0.00573826	0.559,0.431	0.273,0.167	0.275	-0.316
ENSG00000188895.11	MSL1	chr17	+	40131536	40131584	40129244	40129627	40132033	40132098	134146	41,42	89,75	52,64	0.00243931	0.668,0.681	0.513,0.419	0.209	NA
ENSG00000188917.14	TRMT2B	chrX	-	101051250	101051733	101042041	101042312	101051816	101052083	31,35	5,2	17,4	0,0	0.014344	0.756,0.897	1.0,1.0	-0.173	0.241
ENSG00000188917.14	TRMT2B	chrX	-	101051643	101051733	101042041	101042312	101051816	101052070	27,31	5,2	17,5	0,0	0.0103402	0.73,0.886	1.0,1.0	-0.192	0.329
ENSG00000189050.14	RNFT1	chr17	-	59960067	59960168	59958362	59958444	59962539	59962616	28,24	14,20	6,1	12,8	0.0250595	0.5,0.375	0.2,0.059	0.308	NA
ENSG00000189180.15	ZNF33A	chr10	+	38012297	38012350	38010669	38010783	38016870	38017015	88114	1,1	76,61	2,10	0.00684004	0.981,0.985	0.957,0.783	0.113	NA
ENSG00000189190.8	ZNF600	chr19	-	52781316	52781464	52780827	52781055	52786594	52786724	24,30	11,13	11,7	14,21	0.00637991	0.522,0.536	0.282,0.143	0.317	NA
ENSG00000189283.9	FHIT	chr3	-	61042046	61042099	60821918	60822011	61200616	61200665	16,37	0,1	12,32	3,4	0.0162685	1.0,0.956	0.703,0.825	0.214	NA
ENSG00000189308.10	LIN54	chr4	-	82946257	82946474	82939888	82939962	82970326	82970469	39,78	5,4	80,66	1,0	0.00965461	0.796,0.907	0.976,1.0	-0.136	NA
ENSG00000189319.13	FAM53B	chr10	-	124696157	124696212	124681606	124682379	124706635	124706887	84,97	2,12	64,35	21,22	0.000281588	0.961,0.825	0.639,0.481	0.333	NA
ENSG00000196118.11	CCDC189	chr16	-	30759341	30759724	30757466	30757654	30760283	30760453	7,6	10,3	3,2	1,0	0.0394476	0.259,0.5	0.6,1.0	-0.421	NA
ENSG00000196155.12	PLEKHG4	chr16	+	67280710	67280806	67277509	67280543	67280881	67281005	14,9	0,0	8,0	3,1	0.0134505	1.0,1.0	0.571,0.0	0.715	NA
ENSG00000196204.11	RNF216P1	chr7	+	4989033	4989177	4984909	4985075	4996609	4997119	6,19	1,0	14,8	1,5	0.0437879	0.75,1.0	0.875,0.444	0.216	NA
ENSG00000196305.17	IARS	chr9	-	92253361	92253453	92251807	92251885	92256679	92256800	206242	0,3	159,79	14,8	4.85486e-06	1.0,0.976	0.85,0.832	0.147	NA
ENSG00000196312.11	HIATL2	chr9	-	96933794	96933915	96918642	96918826	96949554	96949585	16,16	4,6	3,0	5,4	0.00807356	0.667,0.571	0.231,0.0	0.503	NA
ENSG00000196352.14	CD55	chr1	+	207370708	207370834	207367369	207367487	207372768	207373252	5,9	6,9	1,0	7,1	0.00823572	0.294,0.333	0.067,0.0	0.28	NA
ENSG00000196357.11	ZNF565	chr19	-	36201976	36202050	36195029	36195156	36214621	36214663	17,13	0,0	2,2	2,1	0.0446802	1.0,1.0	0.336,0.503	0.581	NA
ENSG00000196387.9	ZNF140	chr12	+	133100986	133101053	133083465	133083561	133105509	133107428	9,12	20,41	0,1	17,33	0.000255273	0.193,0.135	0.0,0.016	0.156	-0.464
ENSG00000196405.12	EVL	chr14	+	100139333	100139369	100138811	100138897	100141179	100141246	13,14	21,21	7,4	27,34	0.0271187	0.297,0.312	0.15,0.074	0.193	-0.501
ENSG00000196535.14	MYO18A	chr17	-	29116443	29116455	29115663	29115840	29118044	29118189	11,11	0,0	17,4	1,4	0.0347678	1.0,1.0	0.937,0.466	0.298	NA
ENSG00000196586.13	MYO6	chr6	+	75907604	75907708	75892529	75892690	75908495	75908627	153172	0,6	195108	4,20	0.0329817	1.0,0.935	0.961,0.73	0.122	NA
ENSG00000196715.5	VKORC1L1	chr7	+	65948670	65948780	65873266	65873565	65954073	65959563	90100	1,0	90113	7,6	0.00380531	0.978,1.0	0.865,0.904	0.104	NA
ENSG00000196776.14	CD47	chr3	-	108049618	108049651	108047080	108047292	108057476	108057569	33,17	92136	13,3	161209	3.38452e-05	0.201,0.081	0.054,0.01	0.109	-0.408
ENSG00000196776.14	CD47	chr3	-	108051938	108051970	108043298	108047292	108057476	108057569	169157	92136	70,29	161209	6.97069e-09	0.565,0.45	0.235,0.089	0.345	NA
ENSG00000197045.12	GMFB	chr14	-	54482152	54482202	54481394	54481458	54483670	54483767	126150	1,4	108,61	2,15	0.0290962	0.987,0.958	0.97,0.711	0.132	NA
ENSG00000197283.12	SYNGAP1	chr6	+	33440728	33440965	33438774	33438919	33441172	33441374	25,19	3,4	22,7	0,0	0.00413156	0.806,0.704	1.0,1.0	-0.245	NA
ENSG00000197323.10	TRIM33	chr1	-	114430797	114430912	114427747	114427894	114433616	114433733	529667	23,66	557353	84157	0.00199445	0.92,0.835	0.768,0.529	0.229	-0.131
ENSG00000197323.10	TRIM33	chr1	-	114420379	114420451	114410183	114410316	114421435	114421636	48,68	87119	31,8	95,53	0.0185926	0.221,0.227	0.144,0.072	0.116	NA
ENSG00000197467.13	COL13A1	chr10	+	69898696	69898762	69897474	69897531	69902747	69902855	0,1	7,4	8,9	15,12	0.0104368	0.0,0.118	0.222,0.287	-0.196	NA
ENSG00000197467.13	COL13A1	chr10	+	69898696	69898762	69895549	69895576	69902747	69902855	0,1	5,4	13,16	35,19	0.0180505	0.0,0.118	0.166,0.311	-0.179	NA
ENSG00000197555.9	SIPA1L1	chr14	+	71576534	71576587	71529311	71529370	71587570	71587765	13,9	45,46	1,0	28,17	0.00215975	0.146,0.104	0.021,0.0	0.115	NA
ENSG00000197563.9	PIGN	chr18	-	62140419	62140479	62138982	62139075	62143305	62143346	25,42	1,0	15,12	3,4	0.00288125	0.933,1.0	0.737,0.627	0.285	-0.37
ENSG00000197586.12	ENTPD6	chr20	+	25206521	25206590	25195756	25195867	25207075	25207397	73,66	21,22	48,29	41,38	0.000368485	0.646,0.611	0.38,0.286	0.296	NA
ENSG00000197594.11	ENPP1	chr6	+	131874267	131874337	131872922	131873050	131875775	131875863	146123	0,0	106,42	1,6	0.0367118	1.0,1.0	0.982,0.785	0.117	NA
ENSG00000197694.13	SPTAN1	chr9	+	128592982	128593042	128591476	128591625	128594174	128594373	330320	12,14	217,66	38,47	5.14683e-05	0.939,0.928	0.762,0.44	0.333	NA
ENSG00000197860.9	SGTB	chr5	-	65672243	65672281	65671914	65671998	65680493	65680556	15,27	0,0	29,27	0,7	0.0199462	1.0,1.0	1.0,0.721	0.139	NA
ENSG00000197912.13	SPG7	chr16	+	89545871	89546030	89544647	89544772	89546657	89546760	32,49	105,84	30,26	29,18	0.00779076	0.132,0.226	0.341,0.419	-0.201	0.147
ENSG00000197912.13	SPG7	chr16	+	89549080	89549336	89548002	89548113	89550493	89550609	22,18	170172	33,31	82,46	2.40366e-06	0.061,0.05	0.168,0.252	-0.155	NA
ENSG00000197912.13	SPG7	chr16	+	89548979	89549336	89548002	89548113	89550493	89550609	23,19	170172	36,29	82,46	1.65167e-06	0.063,0.052	0.18,0.24	-0.152	NA
ENSG00000197933.12	ZNF823	chr19	-	11724193	11724254	11721992	11723342	11738816	11738945	14,13	0,0	16,4	1,5	0.00485813	1.0,1.0	0.899,0.308	0.396	NA
ENSG00000197933.12	ZNF823	chr19	-	11725200	11725327	11723112	11723342	11738816	11739009	12,20	0,0	14,1	1,5	0.00414035	1.0,1.0	0.875,0.091	0.517	NA
ENSG00000198000.11	NOL8	chr9	-	92311145	92311259	92310552	92310675	92314266	92316138	106,98	10,18	54,18	18,20	0.0219244	0.841,0.731	0.6,0.31	0.331	-0.46
ENSG00000198000.11	NOL8	chr9	-	92319942	92320137	92319220	92319356	92321667	92321746	6,16	64,59	13,14	20,17	0.00452393	0.045,0.119	0.245,0.292	-0.186	0.102
ENSG00000198000.11	NOL8	chr9	-	92319942	92320379	92319220	92319356	92321667	92321746	7,14	64,59	10,12	20,17	0.0262445	0.052,0.106	0.2,0.261	-0.152	0.126
ENSG00000198000.11	NOL8	chr9	-	92323235	92323351	92321667	92321746	92323440	92323503	20,20	28,26	7,2	26,22	0.00871877	0.263,0.278	0.119,0.043	0.19	NA
ENSG00000198157.10	HMGN5	chrX	-	81195117	81195297	81121534	81121672	81201736	81201886	24,15	1,5	6,3	0,0	0.00996234	0.923,0.6	1.0,1.0	-0.238	NA
ENSG00000198231.12	DDX42	chr17	+	63775107	63775178	63773862	63774376	63787033	63787270	48,34	74,92	16,7	87,78	0.00024104	0.251,0.16	0.087,0.044	0.14	NA
ENSG00000198265.11	HELZ	chr17	-	67193966	67194042	67190156	67190355	67201128	67201185	134174	4,17	172109	31,40	0.0014545	0.944,0.837	0.735,0.577	0.235	-0.214
ENSG00000198265.11	HELZ	chr17	-	67195418	67195470	67190156	67190355	67201128	67201185	106118	4,17	103,61	31,40	0.000672321	0.94,0.805	0.664,0.476	0.302	-0.155
ENSG00000198270.12	TMEM116	chr12	-	111978735	111978787	111943264	111943369	111991757	111991889	1,11	19,17	1,0	20,12	0.01432	0.03,0.278	0.029,0.0	0.14	NA
ENSG00000198393.7	ZNF26	chr12	+	132987664	132987768	132986364	132986873	133006056	133006176	18,9	0,1	5,0	2,2	0.00400545	1.0,0.818	0.556,0.0	0.631	NA
ENSG00000198408.13	MGEA5	chr10	-	101813029	101813127	101807729	101807901	101817823	101818418	5,5	0,0	11,12	2,3	0.0144489	1.0,1.0	0.733,0.667	0.3	NA
ENSG00000198496.10	NBR2	chr17	+	43131207	43131270	43125639	43125770	43138656	43138922	17,9	1,5	8,1	11,8	0.024669	0.903,0.496	0.285,0.064	0.525	-0.444
ENSG00000198556.13	ZNF789	chr7	+	99476402	99476480	99472891	99473056	99479660	99481301	33,36	2,5	17,14	0,0	0.0117518	0.892,0.783	1.0,1.0	-0.162	NA
ENSG00000198561.13	CTNND1	chr11	+	57794009	57794081	57761796	57762046	57795576	57795729	387523	21,40	428197	52106	0.0164782	0.904,0.87	0.809,0.488	0.238	NA
ENSG00000198707.14	CEP290	chr12	-	88109065	88109181	88106995	88107098	88111201	88111351	28,35	0,1	21,5	1,5	0.0172271	1.0,0.946	0.913,0.333	0.35	-0.196
ENSG00000198909.7	MAP3K3	chr17	+	63634708	63634801	63632680	63632802	63646033	63646074	25,35	42,65	20,7	75,43	0.0227092	0.229,0.212	0.118,0.075	0.124	NA
ENSG00000198920.9	KIAA0753	chr17	-	6624754	6624861	6623936	6624006	6628116	6628487	14,15	0,1	10,0	1,3	0.0160924	1.0,0.882	0.833,0.0	0.525	NA
ENSG00000203485.12	INF2	chr14	+	104715283	104715340	104714202	104714856	104718794	104719605	267266	9,33	192105	50135	0.00126269	0.944,0.822	0.687,0.308	0.385	-0.162
ENSG00000203697.11	CAPN8	chr1	-	223628008	223628142	223626988	223627157	223628661	223628780	22,48	13,27	44,20	6,4	0.0132298	0.458,0.471	0.786,0.714	-0.285	NA
ENSG00000203880.11	PCMTD2	chr20	+	64267967	64268010	64265257	64265429	64273220	64275653	64,43	1,0	20,6	6,0	0.0175489	0.976,1.0	0.681,1.0	0.147	NA
ENSG00000204054.12	LINC00963	chr9	+	129502396	129503139	129493477	129493595	129503322	129503672	90115	229240	102,60	110,35	0.000786674	0.164,0.193	0.317,0.462	-0.211	NA
ENSG00000204116.11	CHIC1	chrX	+	73679653	73679713	73679325	73679382	73680954	73684411	21,30	0,0	24,13	7,4	7.28172e-05	1.0,1.0	0.657,0.645	0.349	NA
ENSG00000204385.10	SLC44A4	chr6	-	31874720	31874846	31874459	31874520	31874928	31875028	7,13	0,0	6,2	1,3	0.00976401	1.0,1.0	0.75,0.25	0.5	NA
ENSG00000204469.12	PRRC2A	chr6	+	31625791	31625871	31625459	31625611	31626019	31626162	490589	10,11	386170	25,26	9.05008e-06	0.961,0.964	0.885,0.766	0.137	NA
ENSG00000204580.11	DDR1	chr6	+	30885624	30885680	30883084	30883165	30888687	30888814	71,66	57,48	23,16	50,72	5.27775e-06	0.418,0.442	0.21,0.114	0.268	-0.232
ENSG00000204580.11	DDR1	chr6	+	30884537	30884710	30883084	30883165	30885624	30885680	61,51	4,4	31,20	0,0	0.0216907	0.884,0.864	1.0,1.0	-0.126	NA
ENSG00000204580.11	DDR1	chr6	+	30885624	30885680	30884537	30884710	30888687	30888814	125108	54,51	50,35	40,41	0.0227423	0.572,0.55	0.419,0.33	0.186	NA
ENSG00000204580.11	DDR1	chr6	+	30885624	30885680	30882954	30882983	30888687	30888814	67,62	12,9	23,16	11,16	0.00812651	0.763,0.799	0.547,0.366	0.325	NA
ENSG00000204713.10	TRIM27	chr6	-	28907235	28907262	28904553	28904665	28908807	28908840	121110	8,6	57,22	11,11	0.00736819	0.918,0.932	0.794,0.598	0.229	-0.164
ENSG00000204842.14	ATXN2	chr12	-	111516153	111516363	111513356	111513539	111518248	111518427	73,92	5,11	126,93	2,2	0.01236	0.88,0.807	0.969,0.959	-0.12	NA
ENSG00000204954.9	C12orf73	chr12	-	103953413	103953534	103951583	103951630	103956630	103957147	44,44	96126	23,12	148195	1.36094e-06	0.186,0.149	0.072,0.03	0.116	NA
ENSG00000204954.9	C12orf73	chr12	-	103954874	103954968	103953413	103953534	103956630	103956748	6,5	10,12	1,0	9,6	0.0125161	0.231,0.172	0.053,0.0	0.175	NA
ENSG00000205581.10	HMGN1	chr21	-	39345829	39345958	39345145	39345274	39348291	39348339	259280	523544	138,60	613614	0	0.198,0.205	0.101,0.047	0.128	NA
ENSG00000205664.10	RP11-706O15.1	chrX	-	3818441	3818500	3817527	3817778	3828505	3828859	43,50	5,2	16,8	10,9	0.000117968	0.829,0.934	0.474,0.334	0.477	NA
ENSG00000205981.6	DNAJC19	chr3	-	180986942	180987022	180985409	180985996	180988022	180988096	142159	46,68	96154	94,90	0.0288457	0.607,0.539	0.338,0.461	0.173	-0.407
ENSG00000206149.10	HERC2P9	chr15	+	28655494	28655691	28655272	28655420	28655795	28656026	5,1	9,7	3,2	0,1	0.0124695	0.217,0.067	1.0,0.5	-0.608	NA
ENSG00000213024.11	NUP62	chr19	-	49911104	49911343	49909854	49909884	49927693	49927815	3,5	83102	4,19	44,37	0.00156728	0.018,0.024	0.043,0.204	-0.103	NA
ENSG00000213024.11	NUP62	chr19	-	49927693	49927815	49908973	49909884	49929325	49929504	105123	14,20	55,45	34,36	3.41124e-07	0.789,0.755	0.447,0.385	0.356	NA
ENSG00000213024.11	NUP62	chr19	-	49927693	49927848	49908104	49909884	49929325	49929435	105117	14,20	58,41	34,36	2.24459e-06	0.789,0.745	0.46,0.363	0.356	NA
ENSG00000213079.9	SCAF8	chr6	+	154773988	154774072	154733794	154733930	154787860	154788022	40,54	2,0	48,35	6,22	0.000786674	0.909,1.0	0.8,0.443	0.333	NA
ENSG00000213096.9	ZNF254	chr19	+	24103746	24103867	24091900	24092015	24105939	24106066	2,3	4,6	0,0	5,3	0.0498528	0.2,0.2	0.0,0.0	0.2	NA
ENSG00000213390.10	ARHGAP19	chr10	-	97256317	97256404	97246271	97246337	97259401	97259628	66107	1,7	112114	17,19	0.0142517	0.971,0.884	0.767,0.75	0.169	NA
ENSG00000213420.7	GPC2	chr7	-	100175571	100175894	100174684	100174765	100176206	100176365	3,1	7,3	8,7	1,0	4.56469e-05	0.176,0.143	0.8,1.0	-0.741	NA
ENSG00000213516.9	RBMXL1	chr1	-	88988251	88988351	88983350	88984066	88992584	88992759	22,9	1,0	29,16	2,7	0.0234273	0.917,1.0	0.879,0.533	0.253	NA
ENSG00000213699.8	SLC35F6	chr2	+	26775043	26775215	26774250	26774323	26775463	26775676	41,28	1,5	28,19	0,0	0.0203277	0.953,0.737	1.0,1.0	-0.155	NA
ENSG00000213906.9	LTB4R2	chr14	+	24310170	24310255	24305733	24305867	24310654	24311145	26,21	2,3	18,19	0,0	0.0459953	0.867,0.778	1.0,1.0	-0.177	NA
ENSG00000214021.15	TTLL3	chr3	+	9818554	9818920	9817644	9817759	9820545	9820647	39,55	3,4	22,18	0,0	0.0337505	0.867,0.873	1.0,1.0	-0.13	NA
ENSG00000214021.15	TTLL3	chr3	+	9818821	9818920	9817644	9817759	9820545	9820741	43,52	3,4	24,17	0,0	0.0341618	0.878,0.867	1.0,1.0	-0.127	NA
ENSG00000214046.8	SMIM7	chr19	-	16654034	16654125	16646452	16647261	16659394	16659447	707805	63,96	678483	103170	0.0199667	0.849,0.807	0.767,0.587	0.151	NA
ENSG00000214050.7	FBXO16	chr8	-	28473771	28473807	28465198	28465445	28483347	28483462	12,23	0,0	19,12	1,5	0.00737323	1.0,1.0	0.928,0.621	0.226	NA
ENSG00000214063.10	TSPAN4	chr11	+	862549	862741	850287	850367	864436	864511	24,20	6,0	18,14	0,0	0.0192746	0.667,1.0	1.0,1.0	-0.166	NA
ENSG00000214078.12	CPNE1	chr20	-	35658929	35659014	35632794	35632923	35664801	35664837	5,7	12,15	0,2	11,13	0.042835	0.172,0.189	0.0,0.071	0.145	NA
ENSG00000215041.9	NEURL4	chr17	-	7327164	7327230	7326710	7327009	7327439	7327884	22,37	2,3	30,20	11,10	0.0132501	0.855,0.869	0.594,0.517	0.306	NA
ENSG00000218416.4	PP14571	chr2	-	240450610	240450922	240449417	240449921	240456596	240456714	8,8	0,5	14,9	0,0	0.0368246	1.0,0.444	1.0,1.0	-0.278	NA
ENSG00000221838.9	AP4M1	chr7	+	100106657	100106912	100106402	100106514	100110190	100110319	30,32	7,0	19,18	0,0	0.0186295	0.682,1.0	1.0,1.0	-0.159	NA
ENSG00000221914.8	PPP2R2A	chr8	+	26339902	26339973	26338889	26338987	26354467	26354633	195174	477479	35,25	395372	0	0.175,0.158	0.044,0.034	0.127	NA
ENSG00000221978.11	CCNL2	chr1	-	1388491	1388510	1387953	1388065	1388625	1388743	13,24	24,32	46,47	10,8	1.17646e-07	0.304,0.377	0.788,0.826	-0.466	NA
ENSG00000221978.11	CCNL2	chr1	-	1388949	1389047	1388625	1388743	1390229	1390371	5,11	21,30	19,24	16,26	0.0171476	0.106,0.155	0.373,0.316	-0.214	NA
ENSG00000221994.10	ZNF630	chrX	-	48060818	48060903	48060449	48060545	48066871	48067061	19,17	5,4	4,6	0,0	0.00278048	0.655,0.68	1.0,1.0	-0.333	NA
ENSG00000221994.10	ZNF630	chrX	-	48060818	48060945	48060449	48060545	48066871	48067061	45,46	5,4	14,16	0,0	0.00946818	0.818,0.852	1.0,1.0	-0.165	NA
ENSG00000223485.2	LINC01615	chr6	-	169161067	169161214	169158144	169158456	169162642	169162856	17,5	4,2	2,0	2,2	0.0458993	0.68,0.556	0.333,0.0	0.452	NA
ENSG00000223546.6	LINC00630	chrX	+	102825992	102826169	102816991	102817082	102826968	102827144	44,34	2,4	33,5	0,0	0.0369936	0.917,0.81	1.0,1.0	-0.136	NA
ENSG00000223891.5	OSER1-AS1	chr20	+	44217366	44217682	44214887	44215003	44224820	44224978	12,7	35,36	12,25	18,23	0.017784	0.146,0.089	0.25,0.352	-0.183	NA
ENSG00000225190.8	PLEKHM1	chr17	-	45468208	45468593	45458168	45458439	45475099	45475726	12,7	4,2	12,10	1,0	0.0177221	0.6,0.636	0.857,1.0	-0.31	0.205
ENSG00000225470.6	JPX	chrX	+	73998767	73998844	73994839	73994961	74004269	74004351	19,16	3,3	4,1	6,3	0.00567494	0.76,0.727	0.25,0.143	0.547	NA
ENSG00000226174.6	TEX22	chr14	+	105449358	105449409	105445417	105445511	105450057	105450106	123179	244366	41,37	185216	8.15881e-06	0.232,0.227	0.117,0.093	0.124	-0.23
ENSG00000231770.5	TMEM44-AS1	chr3	+	194589020	194589142	194584010	194584448	194589473	194589626	23,19	2,3	7,1	0,0	0.0437024	0.852,0.76	1.0,1.0	-0.194	NA
ENSG00000233452.6	STXBP5-AS1	chr6	-	147001440	147001543	146972044	146972070	147074804	147074847	13,20	3,3	14,10	0,0	0.00605882	0.684,0.769	1.0,1.0	-0.273	NA
ENSG00000236204.5	LINC01376	chr2	-	18995318	18995364	18986450	18987868	19022333	19022487	15,9	4,2	7,3	0,0	0.00882898	0.701,0.738	1.0,1.0	-0.28	NA
ENSG00000238105.7	GOLGA2P5	chr12	-	100168451	100168633	100167549	100167639	100168923	100169199	16,16	0,5	10,4	0,0	0.0417108	1.0,0.615	1.0,1.0	-0.193	NA
ENSG00000240344.8	PPIL3	chr2	-	200882341	200882435	200881420	200881488	200885697	200885772	238268	38,58	188144	70,77	0.000600455	0.758,0.698	0.573,0.483	0.2	-0.32
ENSG00000240498.6	CDKN2B-AS1	chr9	+	22097257	22097364	22056251	22056387	22112319	22112395	14,7	4,3	9,4	0,0	0.000932647	0.636,0.538	1.0,1.0	-0.413	NA
ENSG00000240498.6	CDKN2B-AS1	chr9	+	22118643	22118767	22097257	22097364	22120199	22120410	21,21	0,0	14,6	3,2	0.00629233	1.0,1.0	0.7,0.6	0.35	NA
ENSG00000240498.6	CDKN2B-AS1	chr9	+	22112319	22112395	22097257	22097364	22120199	22120410	14,9	0,0	10,4	3,2	0.00243931	1.0,1.0	0.625,0.5	0.438	NA
ENSG00000241553.12	ARPC4	chr3	+	9803535	9803707	9800184	9800296	9803842	9804013	16,22	4,4	22,27	0,1	0.00671473	0.667,0.733	1.0,0.931	-0.266	NA
ENSG00000241769.7	LINC00893	chrX	-	149537632	149537778	149536173	149536255	149538114	149538172	7,2	8,3	0,1	3,3	0.0330615	0.304,0.25	0.0,0.143	0.206	NA
ENSG00000241837.6	ATP5O	chr21	-	33906727	33906794	33906448	33906500	33907340	33907412	9,11	0,5	6,11	0,0	0.0337505	1.0,0.539	1.0,1.0	-0.23	NA
ENSG00000242802.6	AP5Z1	chr7	+	4790458	4790591	4789831	4789929	4790809	4790887	9,16	8,7	14,11	1,0	0.000520025	0.36,0.533	0.875,1.0	-0.491	NA
ENSG00000243323.5	PTPRVP	chr1	+	202181888	202181936	202181657	202181784	202183127	202183221	20,37	3,3	11,5	0,0	0.0430804	0.804,0.883	1.0,1.0	-0.156	NA
ENSG00000244625.5	MIATNB	chr22	+	26718139	26718231	26717252	26717459	26721649	26722172	16,21	0,0	14,19	5,3	0.000567021	1.0,1.0	0.583,0.76	0.329	NA
ENSG00000244687.11	UBE2V1	chr20	-	50084128	50084254	50081123	50082914	50096671	50096820	10131155	2,14	979849	40118	0	0.996,0.976	0.924,0.782	0.133	NA
ENSG00000244754.8	N4BP2L2	chr13	-	32522181	32522270	32517874	32518003	32527407	32527532	162180	1,0	152,77	1,17	0.000932647	0.988,1.0	0.987,0.694	0.153	NA
ENSG00000244754.8	N4BP2L2	chr13	-	32521372	32521449	32517856	32518003	32535768	32537027	294278	0,0	217138	7,23	8.80112e-08	1.0,1.0	0.939,0.75	0.155	NA
ENSG00000244754.8	N4BP2L2	chr13	-	32527407	32527532	32517487	32518003	32535768	32537027	85,93	0,0	87,75	7,23	1.36094e-06	1.0,1.0	0.861,0.62	0.26	NA
ENSG00000245937.7	LINC01184	chr5	-	128081972	128082191	128061143	128061244	128082734	128082974	25,49	28,28	28,18	6,1	0.0115133	0.309,0.467	0.7,0.9	-0.412	NA
ENSG00000245937.7	LINC01184	chr5	-	128081972	128082191	127965887	127966928	128082734	128082974	12,15	1,6	8,4	0,0	0.00242696	0.857,0.556	1.0,1.0	-0.293	NA
ENSG00000247572.7	CKMT2-AS1	chr5	-	81246889	81246972	81237564	81239360	81301286	81301560	4,1	5,6	1,1	0,0	1.71991e-06	0.286,0.077	1.0,1.0	-0.819	NA
ENSG00000248049.6	UBA6-AS1	chr4	+	67720421	67721051	67701360	67701484	67728539	67728686	45,49	2,10	33,43	15,19	0.0325684	0.918,0.71	0.524,0.531	0.286	NA
ENSG00000248727.5	CTC-236F12.4	chr5	-	56464008	56464116	56457794	56457943	56467711	56467812	21,14	1,4	14,2	0,0	0.0227287	0.913,0.636	1.0,1.0	-0.226	0.252
ENSG00000249859.7	PVT1	chr8	+	128099369	128099573	128096517	128096654	128100979	128101253	76,59	107,67	81,62	44,34	0.00186307	0.262,0.306	0.479,0.477	-0.194	NA
ENSG00000249859.7	PVT1	chr8	+	127939507	127939676	127890627	127890998	127989161	127989291	267298	41,56	283295	79101	0.0129199	0.765,0.727	0.642,0.594	0.128	NA
ENSG00000249859.7	PVT1	chr8	+	128070159	128070272	127989161	127989291	128096517	128096654	72100	9,9	102,82	23,27	0.0284625	0.8,0.847	0.689,0.603	0.178	NA
ENSG00000249859.7	PVT1	chr8	+	128082752	128082848	127989260	127989291	128096517	128096656	12,7	9,9	3,7	23,27	0.014212	0.4,0.28	0.061,0.115	0.252	NA
ENSG00000250565.6	ATP6V1E2	chr2	-	46537375	46537576	46536610	46536703	46541389	46541589	3,8	9,18	1,0	8,2	0.0394225	0.143,0.182	0.059,0.0	0.133	NA
ENSG00000250903.8	GMDS-AS1	chr6	+	2269697	2269799	2263600	2263684	2283498	2283774	13,14	4,1	9,4	0,0	0.0127552	0.619,0.875	1.0,1.0	-0.253	NA
ENSG00000251022.6	THAP9-AS1	chr4	-	82895691	82895774	82893008	82894847	82900076	82900223	28,25	16,14	25,9	42,39	0.000867116	0.467,0.472	0.229,0.103	0.303	-0.4
ENSG00000251022.6	THAP9-AS1	chr4	-	82897988	82898062	82893008	82894847	82900076	82900223	30,20	16,14	10,4	42,39	6.68505e-08	0.487,0.42	0.108,0.049	0.375	-0.393
ENSG00000251369.8	ZNF550	chr19	-	57543650	57544583	57541839	57543243	57546456	57547993	35,31	1,0	15,12	1,4	0.03049	0.946,1.0	0.882,0.6	0.232	-0.184
ENSG00000251595.7	ABCA11P	chr4	-	437445	437511	425814	426973	472574	472701	22,8	6,0	9,6	0,0	0.012867	0.663,1.0	1.0,1.0	-0.168	NA
ENSG00000257923.9	CUX1	chr7	+	102198801	102198867	102196939	102197305	102200070	102200172	104122	19,22	96,57	39,46	0.00384502	0.746,0.748	0.569,0.399	0.263	NA
ENSG00000258704.5	SRP54-AS1	chr14	-	34963928	34964040	34934016	34934131	34969169	34969307	10,27	0,0	26,33	2,4	0.0271581	1.0,1.0	0.867,0.805	0.164	NA
ENSG00000261732.1	LA16c-431H6.6	chr16	+	1667334	1667400	1666421	1666600	1667961	1668184	55,52	6,6	59,22	0,2	0.0464718	0.831,0.823	1.0,0.855	-0.101	-0.23
ENSG00000262943.7	ALOX12P2	chr17	+	6894317	6894513	6892002	6892075	6894883	6895006	28,17	2,3	8,10	0,0	0.0400652	0.875,0.739	1.0,1.0	-0.193	NA
ENSG00000265681.7	RPL17	chr18	-	49491745	49491833	49491531	49491584	49492274	49492428	68101	47,53	119120	34,38	0.0264947	0.42,0.488	0.636,0.612	-0.17	0.239
ENSG00000265681.7	RPL17	chr18	-	49491735	49491833	49491531	49491584	49492274	49492399	250347	47,53	383424	34,38	0.0216225	0.727,0.766	0.849,0.848	-0.102	0.37
ENSG00000265808.3	SEC22B	chr1	-	120168839	120168949	120163209	120163370	120176306	120176515	339331	3,3	184119	9,11	0.000251762	0.983,0.982	0.911,0.844	0.105	NA
ENSG00000266173.5	STRADA	chr17	-	63707246	63707418	63706634	63706739	63710490	63710614	128137	14,23	124107	7,3	0.0138684	0.821,0.749	0.899,0.947	-0.138	NA
ENSG00000266338.6	NBPF15	chr1	-	144460842	144460961	144459365	144459483	144461380	144461674	31,55	7,12	37,15	2,0	0.0113393	0.689,0.696	0.902,1.0	-0.259	NA
ENSG00000266714.6	MYO15B	chr17	+	75591976	75592080	75591600	75591712	75592237	75592301	107,80	13,9	55,74	4,0	0.044598	0.805,0.816	0.873,1.0	-0.126	0.191
ENSG00000266714.6	MYO15B	chr17	+	75594474	75594588	75592678	75592840	75594839	75594972	32,44	23,16	25,25	3,1	0.00423869	0.41,0.579	0.806,0.926	-0.372	NA
ENSG00000266714.6	MYO15B	chr17	+	75592427	75592541	75592237	75592301	75592678	75592840	27,40	21,17	30,34	4,4	0.00767949	0.391,0.541	0.789,0.81	-0.334	NA
ENSG00000266714.6	MYO15B	chr17	+	75592463	75592541	75592237	75592301	75592678	75592840	85,98	21,17	53,74	4,4	0.020766	0.669,0.742	0.869,0.902	-0.18	NA
ENSG00000267254.5	ZNF790-AS1	chr19	+	36801875	36801933	36797562	36797811	36827649	36828115	13,16	4,2	12,5	0,0	0.00413159	0.649,0.82	1.0,1.0	-0.266	NA
ENSG00000268104.2	SLC6A14	chrX	+	116457608	116457776	116455356	116455466	116458808	116461458	174148	6,5	129106	11,14	0.0317477	0.935,0.937	0.854,0.791	0.114	NA
ENSG00000268362.5	CTD-2017D11.1	chr19	+	24048936	24049014	24046183	24046279	24049404	24049548	32,35	7,5	13,3	1,0	0.0479274	0.696,0.778	0.867,1.0	-0.197	NA
ENSG00000269051.5	CTD-2245F17.3	chr19	+	53202551	53202702	53200623	53200703	53204015	53204142	8,10	9,18	14,6	2,1	0.00272516	0.308,0.217	0.778,0.75	-0.502	NA
ENSG00000273611.4	ZNHIT3	chr17	+	36486934	36486966	36486699	36486785	36492812	36492899	147162	3,10	139112	11,22	0.0203041	0.972,0.92	0.899,0.783	0.105	NA
ENSG00000275052.4	PPP4R3B	chr2	-	55578246	55578342	55577314	55577356	55579678	55579781	69,51	98121	24,5	101,31	0.00755379	0.26,0.174	0.106,0.075	0.127	-0.225
ENSG00000276291.5	FRG1HP	chr9	+	40993252	40993434	40992248	40992479	40994632	40994699	33,40	7,8	24,14	0,0	0.000369081	0.702,0.714	1.0,1.0	-0.292	NA
ENSG00000276805.2	RP11-291L22.9	chr10	+	38412728	38412882	38412227	38412443	38413326	38413392	2,0	5,6	6,10	2,2	0.000431252	0.167,0.0	0.6,0.714	-0.574	NA
ENSG00000276805.2	RP11-291L22.9	chr10	+	38415543	38415602	38413326	38413392	38416681	38417204	8,14	0,0	3,5	2,2	0.00867709	1.0,1.0	0.458,0.585	0.479	NA
ENSG00000280828.1	RP11-274B21.1	chr7	+	128577963	128578033	128574719	128574791	128578889	128578933	50,57	21,20	27,6	31,41	0.000189153	0.554,0.597	0.312,0.071	0.384	NA
ENSG00000281398.2	SNHG4	chr5	+	139278564	139278740	139278326	139278408	139279050	139279129	0,1	8,4	3,6	9,13	0.0476898	0.0,0.111	0.143,0.188	-0.11	NA
ENSG00000282508.1	LINC01002	chr19	-	223966	224048	221140	221205	229635	230151	10,12	9,15	5,2	23,15	0.0132384	0.357,0.286	0.098,0.063	0.241	NA

## Sheet: siMBNL2_MXE
GENCODE_GeneID	geneSymbol	chr	strand	X1stExonStart_0base	X1stExonEnd	X2ndExonStart_0base	X2ndExonEnd	upstreamES	upstreamEE	downstreamES	downstreamEE	IJC_SAMPLE_1	SJC_SAMPLE_1	IJC_SAMPLE_2	SJC_SAMPLE_2	FDR	IncLevel1	IncLevel2	siMBNL2.IncLevelDifference	MCF-7.IncLevelDifference
ENSG00000001617.11	SEMA3F	chr3	+	50174212	50174350	50175095	50175188	50174051	50174114	50176767	50176861	31,33	42,39	31,17	16,6	0.0284023	0.425,0.458	0.66,0.739	-0.258	NA
ENSG00000010244.16	ZNF207	chr17	+	32360891	32360967	32361467	32361515	32360597	32360765	32362913	32362984	297391	110137	410565	120,75	0.0431177	0.687,0.699	0.735,0.86	-0.104	NA
ENSG00000028116.16	VRK2	chr2	+	58084088	58084138	58088340	58088446	58058351	58058488	58089630	58089723	3,5	38,44	0,0	31,17	0.0325611	0.087,0.121	0.0,0.0	0.104	NA
ENSG00000028203.17	VEZT	chr12	+	95256549	95256622	95257149	95257239	95251939	95252071	95262905	95263081	92108	126158	69,29	173138	0.00282616	0.427,0.411	0.289,0.177	0.186	NA
ENSG00000033030.13	ZCCHC8	chr12	-	122490461	122490567	122492714	122492789	122489385	122489463	122498826	122498867	68,74	64,65	61,49	25,22	0.0260782	0.517,0.534	0.711,0.692	-0.176	NA
ENSG00000046651.14	OFD1	chrX	+	13763744	13763855	13767126	13767284	13762343	13762444	13768053	13768224	206205	117126	163131	148168	0.0112119	0.638,0.619	0.524,0.438	0.148	-0.176
ENSG00000049759.16	NEDD4L	chr18	+	58335477	58335537	58341037	58341169	58333817	58333892	58341677	58341797	39,57	49,84	31,18	104,77	0.00116364	0.471,0.432	0.25,0.207	0.223	NA
ENSG00000051825.14	MPHOSPH9	chr12	-	123202623	123203084	123203113	123203375	123202163	123202319	123210055	123210162	40,52	36,56	31,17	66,63	0.00547895	0.526,0.481	0.32,0.212	0.238	NA
ENSG00000051825.14	MPHOSPH9	chr12	-	123203249	123203375	123210055	123210162	123202623	123203084	123218375	123218499	12,9	35,33	24,36	29,10	0.0150478	0.255,0.214	0.453,0.783	-0.384	NA
ENSG00000058091.16	CDK14	chr7	+	90726566	90726812	90747680	90747775	90604217	90604249	90790572	90790652	1,9	5,9	0,0	5,2	0.00184525	0.167,0.5	0.0,0.0	0.334	NA
ENSG00000060237.16	WNK1	chr12	+	879572	880031	880720	880999	878211	878361	881691	881789	4,5	26,19	14,20	11,4	0.000279952	0.133,0.208	0.56,0.833	-0.526	NA
ENSG00000060971.17	ACAA1	chr3	-	38131925	38132005	38133951	38134009	38129289	38129388	38136591	38136685	43,43	18,23	21,15	21,31	0.0350918	0.731,0.68	0.532,0.355	0.262	-0.441
ENSG00000064787.12	BCAS1	chr20	-	53957431	53957497	53966905	53967073	53953431	53953695	53985286	53985499	116168	436388	103,61	83,6	0.000269889	0.199,0.288	0.537,0.905	-0.478	0.28
ENSG00000064787.12	BCAS1	chr20	-	53957431	53957497	53975388	53975430	53953431	53953695	53985286	53985499	399462	436388	256117	83,6	1.47129e-08	0.525,0.59	0.788,0.959	-0.316	NA
ENSG00000064787.12	BCAS1	chr20	-	53966905	53967073	53975388	53975430	53957431	53957497	53985286	53985499	335375	278276	181,72	70,9	0.000366465	0.609,0.637	0.77,0.912	-0.218	NA
ENSG00000072609.17	CHFR	chr12	-	132862332	132862425	132870723	132870783	132861466	132861634	132872284	132872394	33,32	4,2	26,25	12,7	0.0431588	0.902,0.947	0.708,0.8	0.17	NA
ENSG00000072682.18	P4HA2	chr5	-	132198205	132198271	132198320	132198380	132195411	132195480	132198878	132198932	287353	124217	354324	306314	0.00455479	0.707,0.63	0.547,0.519	0.135	NA
ENSG00000073350.13	LLGL2	chr17	+	75573951	75573980	75574212	75574260	75573480	75573631	75574609	75574668	464466	135162	327262	162172	0.00212775	0.803,0.773	0.705,0.643	0.114	NA
ENSG00000075131.9	TIPIN	chr15	-	66349314	66349437	66351524	66351600	66341149	66341356	66352128	66352207	25,19	0,1	8,1	3,3	0.00357405	1.0,0.95	0.727,0.25	0.486	NA
ENSG00000075131.9	TIPIN	chr15	-	66351524	66351600	66352128	66352207	66349314	66349437	66352814	66352955	20,26	23,18	16,12	4,1	0.0168544	0.465,0.591	0.8,0.923	-0.334	NA
ENSG00000076513.16	ANKRD13A	chr12	+	110021107	110021301	110024045	110024112	110019138	110019328	110025741	110025823	3,2	60,79	9,4	46,23	0.0268375	0.045,0.023	0.155,0.141	-0.114	NA
ENSG00000079277.19	MKNK1	chr1	-	46580529	46580627	46583227	46583329	46576574	46576654	46594112	46594280	87,78	102128	61,65	49,42	0.0336809	0.46,0.379	0.555,0.607	-0.161	NA
ENSG00000081870.11	HSPB11	chr1	-	53930038	53930145	53939984	53940097	53923532	53923947	53945554	53945610	22,43	4,4	41,70	14,40	0.0115478	0.846,0.915	0.745,0.636	0.19	NA
ENSG00000086300.15	SNX10	chr7	+	26354056	26354184	26357006	26357127	26346419	26346466	26360974	26361061	4,2	10,16	0,0	26,20	0.012788	0.286,0.111	0.0,0.0	0.198	NA
ENSG00000087470.17	DNM1L	chr12	+	32737864	32737942	32738263	32738296	32737104	32737161	32740063	32740240	6,9	38,37	17,7	22,12	0.0316316	0.101,0.148	0.355,0.294	-0.2	NA
ENSG00000088298.12	EDEM2	chr20	-	35131641	35131783	35134737	35134949	35126250	35126375	35137879	35138005	57,76	47,53	48,30	71,51	0.0224239	0.548,0.589	0.403,0.37	0.182	NA
ENSG00000099377.13	HSD3B7	chr16	+	30985652	30985824	30986048	30986204	30985210	30985297	30986422	30986531	26,24	59,79	13,10	88,70	0.0313977	0.306,0.233	0.129,0.125	0.143	NA
ENSG00000099968.17	BCL2L13	chr22	+	17683213	17683321	17702242	17702386	17655661	17655832	17726676	17730855	154220	120160	142130	55,33	0.000303284	0.562,0.579	0.721,0.798	-0.189	NA
ENSG00000100429.17	HDAC10	chr22	-	50248365	50248472	50248661	50248751	50248224	50248292	50249327	50249454	5,3	26,37	0,0	34,35	0.0154602	0.161,0.075	0.0,0.0	0.118	NA
ENSG00000100731.15	PCNX	chr14	+	70988566	70988699	70995740	70995843	70976941	70978648	71009633	71009724	7,14	0,1	6,4	1,7	0.013388	1.0,0.933	0.857,0.364	0.356	NA
ENSG00000101040.19	ZMYND8	chr20	-	47212641	47212725	47220257	47220324	47209213	47210897	47221313	47221474	322398	232212	314211	42,11	0	0.596,0.666	0.888,0.953	-0.289	0.115
ENSG00000101150.17	TPD52L2	chr20	+	63882718	63882820	63889189	63889238	63873667	63873816	63889849	63891545	143188	402475	337387	465378	1.90169e-06	0.226,0.245	0.373,0.456	-0.179	0.104
ENSG00000101150.17	TPD52L2	chr20	+	63875815	63875875	63882718	63882820	63873667	63873816	63889189	63889238	303357	806950	210107	987943	1.51236e-07	0.296,0.296	0.192,0.113	0.143	NA
ENSG00000101150.17	TPD52L2	chr20	+	63882718	63882820	63889189	63889238	63875815	63875875	63889849	63891545	359501	400469	275121	456348	0.000459869	0.424,0.467	0.331,0.222	0.169	NA
ENSG00000101901.10	ALG13	chrX	+	111708026	111708393	111712483	111712530	111684964	111685103	111713224	111713297	10,11	13,21	1,0	4,1	0.0429092	0.383,0.297	0.168,0.0	0.256	NA
ENSG00000102871.15	TRADD	chr16	-	67155095	67155294	67155376	67155654	67154179	67154959	67156509	67156668	72,62	113100	37,26	92108	0.033804	0.389,0.383	0.287,0.194	0.146	NA
ENSG00000103248.18	MTHFSD	chr16	-	86552032	86552146	86552178	86552292	86548463	86548577	86554644	86554748	67,41	58,66	25,7	73,28	0.0206146	0.536,0.383	0.255,0.2	0.232	-0.191
ENSG00000103248.18	MTHFSD	chr16	-	86551972	86552146	86552178	86552292	86548463	86548577	86554644	86554751	67,41	32,38	25,7	42,18	0.0326025	0.677,0.519	0.373,0.28	0.272	NA
ENSG00000103978.15	TMEM87A	chr15	-	42231191	42231260	42231843	42231915	42228711	42228820	42233212	42233306	29,39	122152	13,12	142139	0.00307484	0.189,0.201	0.082,0.078	0.115	NA
ENSG00000104299.14	INTS9	chr8	-	28813491	28813612	28835291	28835378	28812326	28812461	28837636	28837776	4,11	16,19	13,9	2,6	0.0224239	0.2,0.367	0.867,0.6	-0.45	NA
ENSG00000105793.15	GTPBP10	chr7	+	90372154	90372228	90374301	90374354	90352815	90353009	90377506	90377614	0,3	78,62	4,10	43,42	0.00545185	0.0,0.04	0.074,0.17	-0.102	NA
ENSG00000105865.10	DUS4L	chr7	+	107567049	107567186	107571144	107571266	107563957	107564209	107575187	107575310	10,12	9,10	15,13	1,0	2.32785e-05	0.526,0.545	0.938,1.0	-0.433	NA
ENSG00000105953.14	OGDH	chr7	+	44647443	44647534	44647656	44647759	44645326	44645518	44656317	44656362	12,17	54,74	3,3	97,31	0.00397093	0.182,0.187	0.03,0.088	0.126	-0.145
ENSG00000105953.14	OGDH	chr7	+	44647443	44647534	44647656	44647759	44645326	44645518	44666735	44666851	30,37	119141	14,9	159,62	0.0176627	0.201,0.208	0.081,0.127	0.101	-0.108
ENSG00000106086.18	PLEKHA8	chr7	+	30050433	30050474	30052708	30052866	30049223	30049382	30054708	30054865	14,10	44,56	5,5	80105	0.00626372	0.293,0.189	0.075,0.058	0.174	NA
ENSG00000107651.12	SEC23IP	chr10	+	119904083	119904277	119909040	119909130	119902798	119903009	119912043	119912164	41,70	51,55	59,73	30,16	0.0192694	0.446,0.56	0.663,0.82	-0.239	NA
ENSG00000107758.15	PPP3CB	chr10	-	73439871	73439901	73444724	73444822	73436805	73438420	73446491	73446576	81,85	34,24	79,64	3,7	0.000200857	0.623,0.711	0.948,0.864	-0.239	NA
ENSG00000108384.14	RAD51C	chr17	+	58720745	58720812	58724039	58724100	58709858	58709990	58732483	58732544	205239	216254	182112	124,55	0.0137772	0.476,0.474	0.584,0.661	-0.148	NA
ENSG00000108423.14	TUBD1	chr17	-	59874538	59874703	59880893	59881110	59866608	59866749	59886082	59886230	163143	74,53	143,73	32,7	0.00886453	0.688,0.73	0.817,0.913	-0.156	NA
ENSG00000110497.14	AMBRA1	chr11	-	46508190	46508370	46512726	46512813	46494123	46494204	46541944	46543398	10,12	46,66	3,3	71,75	0.00827509	0.179,0.154	0.041,0.038	0.127	NA
ENSG00000110768.11	GTF2H1	chr11	+	18347831	18347919	18352328	18352446	18347587	18347715	18357951	18358042	112141	86,96	91,91	35,15	0.00319934	0.566,0.595	0.722,0.858	-0.21	NA
ENSG00000111596.11	CNOT2	chr12	+	70310894	70311017	70319297	70319364	70278131	70278274	70335437	70335563	92102	60100	70,60	109138	0.00363243	0.59,0.489	0.376,0.29	0.207	-0.1
ENSG00000112983.17	BRD8	chr5	-	138167933	138168078	138168469	138168688	138165827	138166108	138169221	138169358	59,56	47,55	71,46	28,20	0.0279548	0.557,0.505	0.717,0.697	-0.176	NA
ENSG00000113648.16	H2AFY	chr5	-	135352945	135353045	135360496	135360780	135345967	135346057	135369405	135369603	9,19	192242	24,47	202137	0.00242123	0.045,0.073	0.106,0.255	-0.121	NA
ENSG00000114098.17	ARMC8	chr3	+	138239467	138239528	138241782	138241983	138237481	138237572	138245087	138245183	48,75	27,31	50,42	42,64	0.0341732	0.664,0.729	0.569,0.422	0.201	NA
ENSG00000114107.8	CEP70	chr3	-	138532513	138532570	138537177	138537347	138529374	138529462	138570317	138570498	64,97	35,36	102128	26,13	0.0149547	0.615,0.702	0.774,0.896	-0.176	NA
ENSG00000114268.11	PFKFB4	chr3	-	48539696	48539771	48543579	48543646	48538500	48538619	48549863	48549960	213293	42,53	369261	121119	0.0013576	0.843,0.854	0.763,0.699	0.118	-0.287
ENSG00000114346.13	ECT2	chr3	+	172758979	172759069	172760155	172760263	172755294	172755374	172761609	172761683	2,4	79110	19,18	137,65	0.000366465	0.025,0.035	0.122,0.217	-0.139	NA
ENSG00000115020.16	PIKFYVE	chr2	+	208304845	208305013	208312235	208312295	208304170	208304318	208314293	208314423	2,2	23,45	7,9	26,17	0.011193	0.072,0.038	0.194,0.321	-0.203	NA
ENSG00000115211.15	EIF2B4	chr2	-	27367456	27367559	27368024	27368113	27367073	27367201	27368371	27368463	6,7	48,55	1,0	47,23	0.0114419	0.111,0.113	0.021,0.0	0.102	NA
ENSG00000116001.15	TIA1	chr2	-	70228343	70228462	70229058	70229091	70227734	70227822	70229263	70229318	37,37	22,32	33,41	10,8	0.0175814	0.702,0.618	0.822,0.878	-0.19	NA
ENSG00000116539.10	ASH1L	chr1	-	155477885	155482449	155521099	155521618	155459796	155459898	155562152	155562532	11,30	81,96	30,28	66,37	0.0417903	0.12,0.238	0.313,0.431	-0.193	NA
ENSG00000117360.12	PRPF3	chr1	+	150344375	150344547	150346017	150346136	150344161	150344261	150346407	150346491	23,42	197201	41,87	179166	0.0431177	0.105,0.173	0.186,0.344	-0.126	NA
ENSG00000117475.13	BLZF1	chr1	+	169380480	169380609	169382061	169382281	169376539	169376979	169386996	169387209	2,2	23,17	5,5	5,4	0.00561534	0.08,0.105	0.5,0.556	-0.435	NA
ENSG00000117625.13	RCOR3	chr1	+	211295675	211295753	211312354	211312487	211289331	211289396	211312719	211312819	64,51	12,25	44,47	48,75	0.000397036	0.842,0.671	0.478,0.385	0.325	-0.16
ENSG00000118200.14	CAMSAP2	chr1	+	200847209	200847292	200848031	200850234	200841993	200842087	200852540	200852677	0,2	96119	5,8	69,23	0.000715755	0.0,0.017	0.068,0.258	-0.154	NA
ENSG00000118482.11	PHF3	chr6	+	63679999	63680161	63691736	63692043	63646526	63646795	63694580	63694764	37,41	105133	50,80	55,79	1.94527e-05	0.261,0.236	0.476,0.503	-0.241	NA
ENSG00000118482.11	PHF3	chr6	+	63679999	63680161	63684128	63685911	63646526	63646795	63691736	63692043	44,50	132173	57,86	89,88	0.000613023	0.25,0.224	0.39,0.494	-0.205	NA
ENSG00000119912.15	IDE	chr10	-	92479276	92479421	92480792	92480916	92478644	92478789	92483254	92483337	1,2	16,20	8,8	16,11	0.0100489	0.059,0.091	0.333,0.421	-0.302	NA
ENSG00000119969.14	HELLS	chr10	+	94562811	94562876	94571387	94571429	94562690	94562727	94573959	94574187	16,5	5,1	1,2	0,0	0.012788	0.728,0.807	1.0,1.0	-0.232	NA
ENSG00000122884.12	P4HA1	chr10	-	73043886	73043957	73044980	73045051	73030270	73030370	73046924	73047101	400467	476741	277252	7861098	1.06528e-09	0.457,0.387	0.261,0.187	0.198	NA
ENSG00000123485.11	HJURP	chr2	-	233847396	233847461	233849762	233849859	233845727	233845820	233852564	233852620	26,36	50,78	98,31	91,34	0.0221482	0.325,0.3	0.499,0.458	-0.166	NA
ENSG00000125885.13	MCM8	chr20	+	5972006	5972037	5972575	5972726	5967829	5968025	5973055	5973196	9,12	1,0	5,3	10,4	2.1846e-05	0.928,1.0	0.417,0.517	0.497	NA
ENSG00000126883.16	NUP214	chr9	+	131201646	131201717	131215211	131215368	131197215	131199015	131222777	131222930	88107	112114	95104	62,30	0.00816338	0.448,0.493	0.613,0.782	-0.227	NA
ENSG00000127507.17	ADGRE2	chr19	-	14752328	14752526	14756237	14756345	14751435	14751671	14764432	14764610	1,2	3,8	3,1	0,1	0.012788	0.25,0.2	1.0,0.5	-0.525	NA
ENSG00000128923.10	FAM63B	chr15	+	58821716	58821819	58831773	58831916	58810229	58810388	58847296	58847470	25,21	43,43	18,6	54,85	0.0302863	0.368,0.328	0.25,0.066	0.19	-0.243
ENSG00000130024.14	PHF10	chr6	-	169705615	169705724	169710235	169710391	169705132	169705321	169712385	169712539	246287	155157	267193	98,60	0.0147264	0.613,0.646	0.732,0.763	-0.118	NA
ENSG00000131966.13	ACTR10	chr14	+	58230398	58230480	58231079	58231153	58208998	58209107	58232065	58232267	112161	2,5	91,41	7,9	0.0171964	0.982,0.969	0.928,0.818	0.103	NA
ENSG00000132549.18	VPS13B	chr8	+	99507136	99507203	99507769	99507911	99502835	99502950	99511103	99511512	42,50	12,25	20,9	53,14	4.5339e-05	0.788,0.68	0.286,0.406	0.388	NA
ENSG00000132849.19	INADL	chr1	+	62100318	62100408	62108436	62108520	62084514	62084648	62114052	62114246	11,10	91102	21,7	40,33	0.0330225	0.108,0.089	0.344,0.175	-0.161	NA
ENSG00000134058.10	CDK7	chr5	+	69252417	69252451	69258042	69258153	69235142	69235453	69262204	69262304	87,92	4,14	82,44	22,73	0.00597687	0.968,0.901	0.838,0.456	0.287	-0.151
ENSG00000134058.10	CDK7	chr5	+	69258042	69258153	69262204	69262304	69235393	69235453	69269206	69269293	4,10	127149	17,56	141181	0.000366465	0.031,0.063	0.108,0.236	-0.125	NA
ENSG00000134138.19	MEIS2	chr15	-	36950323	36950400	37036813	37036959	36896627	36896686	37083770	37083885	52,67	41,40	50,37	15,10	0.034533	0.559,0.626	0.769,0.787	-0.185	NA
ENSG00000134152.10	KATNBL1	chr15	-	34148631	34148750	34152789	34153069	34145397	34145491	34154643	34154684	30,42	0,4	56,41	26,35	3.58228e-06	1.0,0.913	0.683,0.539	0.346	-0.179
ENSG00000134222.16	PSRC1	chr1	-	109281136	109281251	109281618	109282060	109280776	109281046	109282517	109282575	161219	104175	306321	158,88	0.0224239	0.608,0.556	0.659,0.785	-0.14	NA
ENSG00000134283.17	PPHLN1	chr12	+	42355160	42355222	42374862	42375074	42335882	42335974	42387455	42387535	32,29	32,28	9,8	39,17	0.0221482	0.524,0.533	0.203,0.342	0.256	NA
ENSG00000134759.13	ELP2	chr18	+	36139418	36139613	36141136	36141201	36138269	36138426	36142825	36142966	0,1	16,16	2,6	22,19	0.0399658	0.0,0.055	0.078,0.226	-0.124	NA
ENSG00000135083.14	CCNJL	chr5	-	160259468	160259771	160280524	160280738	160255548	160255708	160311857	160311972	20,15	37,43	25,17	20,8	0.0139204	0.351,0.259	0.556,0.68	-0.313	NA
ENSG00000135679.21	MDM2	chr12	+	68814602	68814689	68815627	68815720	68813553	68813628	68816811	68816945	17,9	16,28	2,0	34,43	1.45767e-05	0.515,0.243	0.056,0.0	0.351	NA
ENSG00000136045.11	PWP1	chr12	+	107702934	107703031	107703684	107703746	107697466	107697597	107704635	107704747	2,5	54,74	7,13	48,35	0.0215251	0.032,0.058	0.117,0.252	-0.14	NA
ENSG00000136492.8	BRIP1	chr17	-	61693429	61693512	61715950	61716063	61681265	61684140	61743012	61743134	204161	5,4	114,33	13,10	0.000397036	0.976,0.976	0.898,0.767	0.143	NA
ENSG00000136828.18	RALGPS1	chr9	+	126977694	126977745	127034430	127034514	126965843	126965951	127052846	127052939	25,31	8,1	15,10	10,12	0.015444	0.789,0.974	0.643,0.5	0.31	-0.33
ENSG00000137807.13	KIF23	chr15	+	69440767	69441079	69444789	69445041	69440307	69440487	69446008	69446091	43,73	116122	147109	160119	0.0258346	0.27,0.374	0.479,0.478	-0.156	0.181
ENSG00000137807.13	KIF23	chr15	+	69439903	69440077	69440307	69440487	69438247	69438405	69444789	69445041	58,72	22,11	102,87	10,6	0.0418195	0.725,0.867	0.911,0.935	-0.127	0.235
ENSG00000138069.16	RAB1A	chr2	-	65088938	65089070	65097970	65098066	65087870	65088690	65104733	65104806	220264	382387	283511	292202	0.0236882	0.365,0.406	0.492,0.717	-0.219	NA
ENSG00000138382.13	METTL5	chr2	-	169819560	169819643	169821091	169821273	169812456	169812506	169821942	169822057	166196	23,30	184178	61,96	7.70347e-05	0.878,0.867	0.751,0.65	0.172	-0.34
ENSG00000138382.13	METTL5	chr2	-	169812456	169812506	169815476	169815528	169811756	169811858	169819560	169819643	105125	155223	63,34	183216	0.000473686	0.4,0.356	0.253,0.134	0.184	NA
ENSG00000138674.16	SEC31A	chr4	-	82861630	82861708	82862533	82862572	82857688	82857764	82863317	82863392	45,59	170198	17,10	153,91	0.00383236	0.26,0.283	0.129,0.127	0.143	-0.172
ENSG00000138750.14	NUP54	chr4	-	76124648	76124756	76130655	76130749	76118074	76118194	76132522	76132719	4,0	126135	6,23	99,77	5.25382e-05	0.031,0.0	0.057,0.23	-0.128	NA
ENSG00000139428.11	MMAB	chr12	-	109559095	109559155	109561039	109561329	109556753	109557136	109561419	109561517	23,35	139175	37,22	93,54	0.0259217	0.129,0.152	0.262,0.267	-0.124	NA
ENSG00000139436.20	GIT2	chr12	-	109947255	109947504	109951211	109951316	109939164	109939247	109953091	109953234	48,83	8,14	62,40	3,1	0.0236882	0.857,0.856	0.954,0.976	-0.108	NA
ENSG00000140396.12	NCOA2	chr8	-	70216659	70216764	70296743	70296800	70213902	70214075	70403699	70403805	10,11	37,56	5,2	45,69	0.0392207	0.236,0.184	0.113,0.032	0.137	NA
ENSG00000141376.20	BCAS3	chr17	+	61368326	61368494	61380505	61380571	61354361	61354502	61388617	61388708	164279	33,28	360494	14,8	5.48023e-08	0.823,0.903	0.96,0.983	-0.109	NA
ENSG00000141556.20	TBCD	chr17	+	82893546	82893632	82905935	82906053	82884144	82884202	82911757	82911789	0,7	5,14	0,0	10,2	0.0155909	0.0,0.333	0.0,0.0	0.167	NA
ENSG00000141959.16	PFKL	chr21	+	44306680	44306754	44311005	44311083	44300095	44300190	44312104	44312294	243294	373351	145143	140,94	0.0375945	0.398,0.459	0.512,0.607	-0.131	NA
ENSG00000142330.19	CAPN10	chr2	+	240595933	240596521	240596680	240596942	240595023	240595304	240597887	240598087	1,1	22,29	3,6	14,10	0.0155909	0.043,0.033	0.176,0.375	-0.237	NA
ENSG00000142330.19	CAPN10	chr2	+	240595933	240596521	240596849	240596942	240595023	240595304	240597887	240598087	1,1	23,28	3,6	14,10	0.0155909	0.042,0.034	0.176,0.375	-0.237	NA
ENSG00000144445.16	KANSL1L	chr2	-	210098085	210098207	210104103	210104301	210043938	210044104	210129030	210129172	11,21	5,1	8,1	0,0	0.0236882	0.688,0.955	1.0,1.0	-0.179	NA
ENSG00000144504.15	ANKMY1	chr2	-	240507559	240507691	240511860	240512001	240500451	240500565	240512801	240512942	4,5	5,15	0,1	13,2	0.0341732	0.444,0.25	0.0,0.333	0.18	-0.459
ENSG00000144504.15	ANKMY1	chr2	-	240509347	240509455	240511860	240512001	240507559	240507691	240512801	240512942	4,2	13,17	0,0	9,1	0.0235953	0.235,0.105	0.0,0.0	0.17	NA
ENSG00000145833.15	DDX46	chr5	+	134789215	134789264	134790105	134790222	134788512	134788591	134790469	134790552	1,5	11,22	1,0	28,52	0.0279542	0.1,0.217	0.042,0.0	0.138	NA
ENSG00000146282.17	RARS2	chr6	-	87541917	87541994	87545615	87545699	87530783	87530942	87548590	87548646	170209	184217	122,71	185145	0.0375945	0.48,0.491	0.397,0.329	0.122	NA
ENSG00000148384.11	INPP5E	chr9	-	136432478	136432586	136432955	136433075	136431823	136431985	136433154	136433279	12,10	13,11	17,5	3,2	0.0443773	0.48,0.476	0.85,0.714	-0.304	NA
ENSG00000149923.13	PPP4C	chr16	+	30082483	30082534	30082745	30082963	30076314	30076475	30083393	30083567	28,41	5,3	28,23	10,18	0.013489	0.87,0.943	0.771,0.605	0.219	NA
ENSG00000151116.16	UEVLD	chr11	-	18570213	18570377	18575346	18575412	18566346	18566482	18578723	18578808	13,6	15,9	2,0	9,6	0.023747	0.481,0.417	0.192,0.0	0.353	NA
ENSG00000151135.9	TMEM263	chr12	+	106957081	106957149	106959287	106959385	106955827	106956065	106967110	106967180	138166	15,19	115,47	23,26	0.0267988	0.907,0.902	0.841,0.656	0.156	NA
ENSG00000151687.14	ANKAR	chr2	+	189728659	189728821	189737682	189737841	189728266	189728420	189738564	189738682	7,2	5,6	0,0	1,2	0.000983739	0.583,0.25	0.0,0.0	0.416	NA
ENSG00000152942.18	RAD17	chr5	+	69371034	69371171	69372033	69372217	69370059	69370284	69373829	69374087	23,18	45,56	5,2	47,24	0.00901585	0.338,0.243	0.096,0.077	0.204	0.186
ENSG00000152942.18	RAD17	chr5	+	69372033	69372217	69373829	69374087	69371453	69371557	69374627	69374711	0,2	45,56	7,1	30,14	0.0205552	0.0,0.034	0.189,0.067	-0.111	NA
ENSG00000153113.23	CAST	chr5	+	96727488	96727530	96729152	96729209	96722638	96722698	96729611	96729725	264302	281329	330262	191137	0.00010601	0.515,0.509	0.661,0.684	-0.161	0.13
ENSG00000153113.23	CAST	chr5	+	96727488	96727530	96729152	96729209	96695784	96695907	96729611	96729725	56,60	278318	104,80	179131	2.00319e-08	0.185,0.176	0.396,0.408	-0.222	NA
ENSG00000153113.23	CAST	chr5	+	96729611	96729725	96736171	96736240	96727488	96727530	96737848	96737947	84103	306384	166133	308277	0.00149327	0.207,0.204	0.339,0.314	-0.121	NA
ENSG00000153113.23	CAST	chr5	+	96722638	96722698	96727488	96727530	96695835	96695907	96729611	96729725	189243	56,60	200146	104,80	0.0035937	0.745,0.778	0.625,0.612	0.143	NA
ENSG00000153113.23	CAST	chr5	+	96722638	96722698	96729152	96729209	96695784	96695907	96729611	96729725	189243	278318	200146	179131	0.0478519	0.399,0.428	0.522,0.521	-0.108	NA
ENSG00000154144.12	TBRG1	chr11	+	124625670	124625903	124626472	124626609	124624930	124625001	124626903	124627050	22,25	5,4	17,5	0,0	0.00956152	0.815,0.862	1.0,1.0	-0.161	NA
ENSG00000156222.11	SLC28A1	chr15	+	84905538	84905652	84918523	84918604	84904096	84904238	84920988	84921069	3,4	21,19	10,3	6,5	0.0427297	0.125,0.174	0.625,0.375	-0.351	NA
ENSG00000156345.17	CDK20	chr9	-	87969795	87969919	87970567	87970630	87969193	87969349	87970775	87970897	6,12	10,8	1,0	14,7	0.000223852	0.396,0.622	0.073,0.0	0.473	NA
ENSG00000158062.20	UBXN11	chr1	-	26301693	26301722	26302812	26302918	26297961	26298062	26306591	26306704	3,3	10,6	2,4	1,0	0.00545185	0.171,0.256	0.579,1.0	-0.576	NA
ENSG00000158402.18	CDC25C	chr5	-	138319218	138319374	138328483	138328529	138291969	138292116	138330986	138331214	6,6	64,86	19,17	93,48	0.0200229	0.105,0.08	0.203,0.307	-0.163	NA
ENSG00000158402.18	CDC25C	chr5	-	138319218	138319374	138326020	138326054	138291969	138292116	138328483	138328529	27,30	71,98	17,9	111,68	0.034533	0.346,0.298	0.175,0.155	0.157	NA
ENSG00000158483.15	FAM86C1	chr11	+	71791738	71791819	71793379	71793481	71789782	71789845	71796016	71796166	2,1	8,2	1,1	0,0	7.05499e-06	0.2,0.333	1.0,1.0	-0.734	NA
ENSG00000158483.15	FAM86C1	chr11	+	71791735	71791819	71793379	71793481	71789782	71789845	71796016	71796166	4,1	8,2	2,1	0,0	0.000223852	0.333,0.333	1.0,1.0	-0.667	NA
ENSG00000160190.13	SLC37A1	chr21	+	42525775	42525857	42535471	42535550	42518276	42518510	42539511	42539647	31,32	35,47	36,23	17,8	0.00664415	0.47,0.405	0.679,0.742	-0.273	NA
ENSG00000161010.14	C5orf45	chr5	-	179847977	179848066	179851242	179851424	179844173	179844227	179853196	179853276	2,7	87113	7,15	79,40	0.0235953	0.022,0.058	0.081,0.273	-0.137	NA
ENSG00000161249.20	DMKN	chr19	-	35505938	35506049	35509910	35509961	35505717	35505765	35510183	35510252	71,78	150129	45,38	165166	0.00288187	0.362,0.42	0.247,0.216	0.16	-0.212
ENSG00000161249.20	DMKN	chr19	-	35505938	35505986	35509910	35509961	35505717	35505765	35510183	35510252	71,78	235219	45,38	268258	0.00273459	0.228,0.258	0.141,0.126	0.109	-0.132
ENSG00000161249.20	DMKN	chr19	-	35505717	35505765	35509910	35509961	35503303	35503447	35510183	35510252	62,70	56,73	41,35	71116	0.00921037	0.519,0.483	0.36,0.227	0.208	NA
ENSG00000161996.17	WDR90	chr16	+	651826	652039	652466	652535	651643	651747	653340	653451	16,18	38,39	20,19	19,14	0.0456689	0.286,0.306	0.501,0.564	-0.236	NA
ENSG00000162601.9	MYSM1	chr1	-	58668429	58668566	58668631	58668682	58667846	58667921	58668983	58669038	30,33	10,20	13,1	28,32	0.000339747	0.783,0.664	0.358,0.036	0.527	-0.378
ENSG00000162910.18	MRPL55	chr1	-	228108436	228108474	228108954	228109021	228108234	228108318	228109260	228109299	25,27	12,24	15,11	36,40	0.00226473	0.623,0.472	0.249,0.179	0.334	NA
ENSG00000162961.13	DPY30	chr2	-	31869847	31869952	31883385	31883462	31867808	31868492	31891991	31892134	79105	11,19	52,24	24,24	0.00269429	0.878,0.847	0.684,0.5	0.27	NA
ENSG00000162961.13	DPY30	chr2	-	31891991	31892134	31917925	31918037	31869847	31869952	31920797	31920910	106129	11,19	62,66	25,24	0.00288848	0.906,0.872	0.713,0.733	0.166	NA
ENSG00000162961.13	DPY30	chr2	-	31883385	31883462	31891991	31892134	31869847	31869952	31917925	31918037	47,67	43,41	56,61	18,20	0.0367963	0.522,0.62	0.757,0.753	-0.184	NA
ENSG00000162981.13	FAM84A	chr2	+	14641971	14642080	14646403	14646465	14635495	14635644	14649315	14649453	13,14	3,3	9,9	0,0	0.0247433	0.797,0.809	1.0,1.0	-0.197	NA
ENSG00000163319.10	MRPS18C	chr4	+	83458345	83458429	83459739	83459797	83456908	83456958	83460972	83461032	49,51	221330	21,8	329291	3.58975e-07	0.163,0.12	0.053,0.024	0.103	NA
ENSG00000163374.19	YY1AP1	chr1	-	155679927	155680008	155680381	155680456	155679408	155679512	155688070	155688201	28,28	3,5	31,14	14,14	0.0223774	0.904,0.849	0.69,0.502	0.281	NA
ENSG00000163608.14	C3orf17	chr3	-	113011044	113011406	113012733	113013403	113008170	113008430	113013952	113014032	93120	8,20	104111	31,39	0.0109778	0.921,0.857	0.77,0.74	0.134	NA
ENSG00000163913.11	IFT122	chr3	+	129451913	129451998	129458598	129458677	129449870	129449937	129461227	129461304	45,32	32,27	28,22	9,3	0.0273809	0.584,0.542	0.757,0.88	-0.256	NA
ENSG00000163913.11	IFT122	chr3	+	129451913	129451972	129458598	129458677	129449870	129449937	129461227	129461304	34,22	32,27	22,16	9,3	0.0288437	0.545,0.479	0.734,0.857	-0.283	NA
ENSG00000163947.11	ARHGEF3	chr3	-	56958822	56958889	57007181	57007336	56882291	56882354	57035087	57035176	3,5	14,21	0,0	7,15	0.0108086	0.168,0.183	0.0,0.0	0.175	NA
ENSG00000164073.9	MFSD8	chr4	-	127942044	127942158	127943751	127943992	127939852	127939997	127949803	127949847	36,32	13,14	35,33	5,2	0.0224239	0.735,0.696	0.875,0.943	-0.194	NA
ENSG00000164674.15	SYTL3	chr6	+	158713799	158713878	158718086	158718211	158708321	158708391	158725502	158725637	5,4	5,5	0,0	1,1	0.00185663	0.5,0.444	0.0,0.0	0.472	NA
ENSG00000165959.11	CLMN	chr14	-	95221690	95221774	95230071	95230133	95213218	95213409	95319710	95319906	74128	1,7	68,65	11,26	6.72009e-05	0.988,0.953	0.872,0.734	0.167	NA
ENSG00000166037.10	CEP57	chr11	+	95821870	95821978	95822498	95822576	95818826	95818904	95827785	95828027	44,47	49,64	47,42	21,27	0.024148	0.473,0.423	0.691,0.609	-0.202	NA
ENSG00000167110.16	GOLGA2	chr9	-	128267457	128267517	128267933	128267997	128265969	128266020	128268116	128268160	398489	23,62	203203	65,61	2.47584e-08	0.944,0.885	0.752,0.764	0.156	NA
ENSG00000167522.14	ANKRD11	chr16	-	89305205	89305344	89316932	89317078	89291012	89291183	89418283	89418368	47,65	62,86	35,35	76113	0.0284023	0.431,0.43	0.315,0.236	0.155	NA
ENSG00000168010.10	ATG16L2	chr11	+	72826517	72826589	72827187	72827293	72826172	72826243	72828358	72828508	39,24	44,29	42,50	23,24	0.0408582	0.477,0.46	0.652,0.682	-0.199	NA
ENSG00000168385.17	SEPT2	chr2	+	241324215	241324241	241324408	241324662	241317498	241317599	241325992	241326113	82,82	34,52	39,23	43,43	0.0109778	0.783,0.703	0.576,0.445	0.233	NA
ENSG00000169359.13	SLC33A1	chr3	-	155833467	155833585	155833856	155834041	155829687	155829903	155853222	155853317	1,2	35,24	7,7	25,14	0.011115	0.028,0.077	0.219,0.333	-0.224	NA
ENSG00000169398.19	PTK2	chr8	-	140864311	140864399	140879470	140879637	140846598	140846678	140890542	140890769	80126	202221	191213	195136	0.000154381	0.284,0.363	0.495,0.61	-0.229	NA
ENSG00000169660.15	HEXDC	chr17	+	82424418	82424503	82428029	82428127	82419748	82419883	82428557	82428645	27,30	4,5	18,5	0,0	0.0152941	0.871,0.857	1.0,1.0	-0.136	NA
ENSG00000169660.15	HEXDC	chr17	+	82424393	82424503	82428029	82428127	82419748	82419883	82428557	82428645	36,45	4,5	35,15	0,0	0.0235953	0.9,0.9	1.0,1.0	-0.1	NA
ENSG00000169764.14	UGP2	chr2	+	63842538	63842599	63854883	63854936	63840968	63841232	63856305	63856433	21,29	1,0	13,9	4,3	0.00676697	0.952,1.0	0.754,0.738	0.23	NA
ENSG00000170832.12	USP32	chr17	-	60211375	60211514	60212023	60212098	60211012	60211118	60213580	60213662	206242	14,56	131,58	286395	0	0.937,0.813	0.316,0.129	0.652	-0.661
ENSG00000170832.12	USP32	chr17	-	60211012	60211118	60211375	60211514	60209416	60209543	60212023	60212098	423507	494702	278,67	606489	0.000505588	0.461,0.419	0.314,0.121	0.223	NA
ENSG00000170949.17	ZNF160	chr19	-	53086261	53086321	53091412	53091529	53075056	53075183	53091636	53091720	24,34	106127	29,42	57,26	0.0236882	0.168,0.193	0.312,0.591	-0.271	NA
ENSG00000171634.16	BPTF	chr17	+	67875555	67875744	67891843	67892034	67874816	67875020	67893369	67893725	109147	263300	214165	222141	1.75331e-06	0.293,0.329	0.491,0.539	-0.204	NA
ENSG00000171634.16	BPTF	chr17	+	67886127	67886316	67891843	67892034	67875555	67875744	67893369	67893725	44,68	235320	112,83	299216	0.00627083	0.158,0.175	0.273,0.278	-0.109	NA
ENSG00000173276.13	ZBTB21	chr21	-	42002896	42002961	42009466	42009597	41993947	41994108	42010251	42010357	3,3	5,3	6,26	0,1	7.70347e-05	0.357,0.481	1.0,0.96	-0.561	NA
ENSG00000174032.16	SLC25A30	chr13	-	45405882	45405977	45408926	45409074	45402274	45402370	45411361	45411480	13,31	1,1	26,36	6,11	0.0155245	0.929,0.969	0.813,0.766	0.16	NA
ENSG00000177853.14	ZNF518A	chr10	+	96151415	96151566	96155325	96155398	96133555	96133648	96155923	96156047	6,10	3,7	2,0	8,1	0.0322169	0.662,0.583	0.197,0.0	0.524	NA
ENSG00000181555.19	SETD2	chr3	-	47103345	47103423	47105996	47106120	47097954	47098081	47113875	47114004	28,15	2,0	28,23	5,7	0.0443773	0.933,1.0	0.848,0.767	0.159	-0.168
ENSG00000183570.16	PCBP3	chr21	+	45929916	45929995	45930785	45930845	45910901	45911030	45935252	45935305	5,3	27,32	0,0	36,15	0.0236832	0.142,0.077	0.0,0.0	0.109	NA
ENSG00000185480.11	PARPBP	chr12	+	102148234	102148463	102164437	102164608	102123885	102124041	102165728	102165883	1,5	32,20	11,8	14,9	0.00482568	0.03,0.2	0.44,0.471	-0.341	NA
ENSG00000185513.14	L3MBTL1	chr20	+	43515008	43515159	43515291	43515415	43514525	43514776	43516092	43516177	4,3	6,8	0,0	1,1	0.00363243	0.4,0.273	0.0,0.0	0.337	NA
ENSG00000186001.12	LRCH3	chr3	+	197854391	197854445	197865422	197865471	197852560	197852620	197870159	197870278	15,14	0,0	3,8	2,5	0.000549209	1.0,1.0	0.59,0.606	0.402	NA
ENSG00000186998.15	EMID1	chr22	+	29225132	29225216	29226489	29226551	29215526	29215630	29231019	29231140	4,3	8,6	0,0	2,10	0.00383236	0.312,0.312	0.0,0.0	0.312	NA
ENSG00000189223.13	PAX8-AS1	chr2	+	113236512	113236622	113238089	113238212	113235529	113235570	113255389	113255549	3,5	13,24	0,0	6,7	0.0140226	0.188,0.172	0.0,0.0	0.18	NA
ENSG00000189308.10	LIN54	chr4	-	82970326	82970469	82978882	82979006	82939888	82939962	82984160	82984876	18,22	5,4	20,25	1,0	0.0130925	0.783,0.846	0.952,1.0	-0.161	0.14
ENSG00000189308.10	LIN54	chr4	-	82946257	82946474	82970326	82970469	82939888	82939962	82984160	82984876	5,4	24,47	1,0	42,54	0.0155909	0.172,0.078	0.023,0.0	0.114	NA
ENSG00000189319.13	FAM53B	chr10	-	124681606	124682379	124696157	124696212	124621670	124623604	124706635	124706887	40,55	20,43	29,16	43,41	0.0142876	0.699,0.598	0.44,0.312	0.272	NA
ENSG00000196295.11	AC005154.6	chr7	-	30561465	30562128	30563730	30563998	30552099	30552179	30568832	30568989	27,30	14,6	27,31	2,1	0.0096221	0.659,0.833	0.931,0.969	-0.204	NA
ENSG00000196498.13	NCOR2	chr12	-	124354836	124354939	124356641	124356782	124354092	124354196	124362125	124362297	10,8	5,6	10,12	1,1	0.0325611	0.667,0.571	0.909,0.923	-0.297	NA
ENSG00000196776.14	CD47	chr3	-	108049618	108049651	108050577	108050602	108047078	108047292	108057476	108057569	13,9	33,17	0,0	13,3	0.000461815	0.299,0.364	0.0,0.0	0.332	NA
ENSG00000196781.13	TLE1	chr9	-	81633347	81633364	81634096	81634301	81620453	81620557	81652183	81652288	224244	30,24	209157	10,4	0.00590418	0.819,0.86	0.927,0.96	-0.104	NA
ENSG00000197323.10	TRIM33	chr1	-	114433616	114433733	114463103	114463236	114427747	114427894	114463411	114463556	265307	23,66	304295	84158	0.00186047	0.92,0.823	0.784,0.651	0.154	NA
ENSG00000197467.13	COL13A1	chr10	+	69897474	69897531	69898696	69898762	69895549	69895576	69902747	69902855	5,7	0,1	17,17	13,16	0.00197728	1.0,0.882	0.583,0.532	0.384	NA
ENSG00000197563.9	PIGN	chr18	-	62148213	62148338	62154544	62154651	62146995	62147101	62157128	62157227	9,11	26,41	14,20	17,14	0.0189292	0.257,0.212	0.452,0.588	-0.286	NA
ENSG00000198270.12	TMEM116	chr12	-	111965594	111965759	111978735	111978787	111943264	111943369	111991757	111991889	1,11	36,45	1,0	32,25	0.0189622	0.032,0.225	0.036,0.0	0.111	NA
ENSG00000198467.13	TPM2	chr9	-	35684731	35684807	35685063	35685139	35684487	35684550	35685268	35685339	101,86	53,43	52,52	51,55	0.0284023	0.656,0.667	0.505,0.486	0.166	NA
ENSG00000198561.13	CTNND1	chr11	+	57811398	57811486	57814310	57814373	57810108	57810223	57815393	57815500	162196	419479	235239	443317	0.0339208	0.261,0.272	0.326,0.408	-0.1	NA
ENSG00000204580.11	DDR1	chr6	+	30884537	30884710	30885624	30885680	30883084	30883165	30888687	30888814	56,56	71,66	42,41	23,16	0.00626372	0.406,0.424	0.613,0.69	-0.236	NA
ENSG00000204580.11	DDR1	chr6	+	30884537	30884710	30885624	30885680	30883263	30883326	30888687	30888814	54,52	67,62	40,41	24,16	0.0172991	0.411,0.421	0.591,0.69	-0.224	NA
ENSG00000221978.11	CCNL2	chr1	-	1388625	1388743	1388949	1389047	1387953	1388065	1390229	1390371	6,11	45,62	12,23	26,34	0.00677533	0.118,0.151	0.316,0.404	-0.225	NA
ENSG00000223745.7	RP4-717I23.3	chr1	-	93309714	93309790	93315148	93315269	93305387	93305470	93318167	93318228	6,4	7,5	1,0	6,1	0.0200484	0.462,0.444	0.143,0.0	0.382	NA
ENSG00000229358.3	DPY19L1P1	chr7	-	32590878	32591004	32593183	32593306	32585976	32586136	32620403	32620484	1,8	7,9	1,0	6,13	0.0203878	0.125,0.471	0.143,0.0	0.226	NA
ENSG00000240344.8	PPIL3	chr2	-	200882341	200882435	200885261	200885367	200881420	200881488	200885697	200885772	71,74	238268	83,87	188144	0.0189292	0.23,0.216	0.306,0.377	-0.119	NA
ENSG00000240498.6	CDKN2B-AS1	chr9	+	22097257	22097364	22112319	22112395	22056251	22056387	22120199	22120410	1,0	5,5	3,2	1,0	4.17412e-05	0.167,0.0	0.75,1.0	-0.791	NA
ENSG00000240498.6	CDKN2B-AS1	chr9	+	22056251	22056387	22097257	22097364	22049105	22049228	22120199	22120410	10,13	0,0	3,3	3,2	0.00288848	1.0,1.0	0.5,0.6	0.45	NA
ENSG00000241837.6	ATP5O	chr21	-	33906448	33906500	33906727	33906794	33903934	33904021	33907340	33907412	9,11	1,5	7,11	0,0	0.00627083	0.889,0.663	1.0,1.0	-0.224	NA
ENSG00000244754.8	N4BP2L2	chr13	-	32517856	32518003	32527407	32527532	32443696	32444126	32535768	32537027	84,93	3,1	87,58	9,24	0.000111298	0.966,0.989	0.906,0.707	0.171	NA

## Sheet: siMBNL2_A5SS
GENCODE_GeneID	geneSymbol	chr	strand	longExonStart_0base	longExonEnd	shortES	shortEE	flankingES	flankingEE	IJC_SAMPLE_1	SJC_SAMPLE_1	IJC_SAMPLE_2	SJC_SAMPLE_2	FDR	IncLevel1	IncLevel2	siMBNL2.IncLevelDifference	MCF-7.IncLevelDifference
ENSG00000002016.16	RAD52	chr12	-	926795	927263	927144	927263	925449	925525	7,9	2,10	9,12	2,0	0.0413482	0.636,0.31	0.692,1.0	-0.373	NA
ENSG00000010361.13	FUZ	chr19	-	49812446	49812736	49812614	49812736	49812250	49812335	8,5	14,12	0,0	5,8	0.00229289	0.222,0.172	0.0,0.0	0.197	NA
ENSG00000044090.8	CUL7	chr6	-	43052112	43052796	43052208	43052796	43051611	43051763	39,59	80116	46,65	34,36	5.18884e-05	0.196,0.203	0.404,0.474	-0.239	NA
ENSG00000049283.17	EPN3	chr17	+	50532737	50532985	50532737	50532844	50536420	50536625	22,39	3,3	47,22	0,1	0.0442851	0.786,0.867	1.0,0.917	-0.132	NA
ENSG00000058673.15	ZC3H11A	chr1	+	203796292	203796601	203796292	203796496	203801574	203801628	107163	89112	159139	78,42	0.0314536	0.375,0.421	0.505,0.623	-0.166	-0.177
ENSG00000060971.17	ACAA1	chr3	-	38126161	38126700	38126509	38126700	38125825	38125881	103136	35,42	102114	10,10	0.00022742	0.595,0.618	0.836,0.851	-0.237	NA
ENSG00000068745.14	IP6K2	chr3	-	48715314	48715527	48715388	48715527	48695089	48695418	13,18	26,27	7,3	28,25	0.0414339	0.202,0.253	0.112,0.057	0.143	NA
ENSG00000068796.16	KIF2A	chr5	+	62352587	62352710	62352587	62352653	62353274	62353375	63,89	16,22	92110	10,10	0.0332939	0.693,0.698	0.84,0.863	-0.156	NA
ENSG00000070010.18	UFD1L	chr22	-	19475469	19475602	19475495	19475602	19475067	19475100	103,99	10,11	50,43	15,12	0.0323413	0.885,0.871	0.714,0.729	0.156	NA
ENSG00000071462.11	WBSCR22	chr7	+	73683766	73684000	73683766	73683901	73686635	73686731	7,14	1,0	14,18	2,8	0.0169954	0.778,1.0	0.778,0.529	0.236	NA
ENSG00000072310.16	SREBF1	chr17	-	17817547	17817916	17817695	17817916	17817255	17817457	13,27	95126	61182	214217	0.00496587	0.064,0.097	0.125,0.295	-0.13	NA
ENSG00000073060.15	SCARB1	chr12	-	124786356	124786503	124786440	124786503	124782682	124782811	125140	35,38	112113	14,6	0.00233707	0.641,0.648	0.8,0.904	-0.208	NA
ENSG00000087206.16	UIMC1	chr5	-	176968554	176969291	176969052	176969291	176958092	176958154	19,24	1,0	18,17	2,7	0.00633158	0.905,1.0	0.818,0.548	0.269	NA
ENSG00000089335.20	ZNF302	chr19	+	34677638	34678103	34677638	34677856	34678736	34678813	8,8	17,3	3,1	1,0	0.048797	0.19,0.571	0.6,1.0	-0.42	NA
ENSG00000090621.13	PABPC4	chr1	-	39571096	39571349	39571233	39571349	39569862	39570002	118179	226226	110104	110,91	0.044697	0.207,0.284	0.333,0.364	-0.103	0.16
ENSG00000095906.16	NUBP2	chr16	+	1786536	1786955	1786536	1786655	1787676	1787831	65,47	16,25	72,61	7,9	0.0376846	0.67,0.485	0.837,0.772	-0.227	NA
ENSG00000099338.22	CATSPERG	chr19	+	38362375	38362832	38362375	38362574	38364890	38364971	16,11	6,3	3,7	0,0	0.000939348	0.571,0.647	1.0,1.0	-0.391	NA
ENSG00000100321.14	SYNGR1	chr22	+	39374315	39374660	39374315	39374553	39376051	39376197	2,7	2,16	1,0	6,3	0.0390811	0.333,0.179	0.077,0.0	0.217	NA
ENSG00000100483.13	VCPKMT	chr14	-	50116068	50116179	50116079	50116179	50115838	50115911	6,9	7,25	22,27	10,12	0.0140333	0.431,0.241	0.66,0.665	-0.327	NA
ENSG00000100796.17	PPP4R3A	chr14	-	91475810	91475966	91475849	91475966	91473238	91473370	19,33	67,76	14,2	68,58	0.0140203	0.158,0.224	0.12,0.022	0.12	NA
ENSG00000100938.17	GMPR2	chr14	+	24232421	24232847	24232421	24232788	24233218	24233340	120127	80,94	179149	70,49	0.00564006	0.458,0.432	0.59,0.632	-0.166	0.232
ENSG00000101040.19	ZMYND8	chr20	-	47238757	47239138	47238895	47239138	47236325	47236516	85107	114106	105,74	32,4	5.3425e-05	0.272,0.335	0.621,0.902	-0.458	0.359
ENSG00000102125.15	TAZ	chrX	+	154411555	154412006	154411555	154411952	154412085	154412214	5,3	22,30	16,10	37,15	0.0488931	0.118,0.055	0.202,0.281	-0.155	NA
ENSG00000102984.14	ZNF821	chr16	-	71867892	71868037	71867911	71868037	71864902	71865048	24,26	37,50	6,1	38,22	0.00106712	0.343,0.295	0.113,0.035	0.245	NA
ENSG00000103319.11	EEF2K	chr16	+	22258493	22258827	22258493	22258695	22260461	22260529	5,4	150166	18,34	134,65	2.63287e-07	0.016,0.012	0.063,0.207	-0.121	NA
ENSG00000105519.13	CAPS	chr19	+	5914939	5915146	5914939	5915065	5915220	5915877	84,84	11,3	57,54	1,0	0.00634463	0.792,0.933	0.966,1.0	-0.12	NA
ENSG00000105618.13	PRPF31	chr19	+	54128072	54128377	54128072	54128200	54129056	54129370	120128	5,0	62,29	5,6	0.0180256	0.923,1.0	0.861,0.707	0.177	NA
ENSG00000106077.18	ABHD11	chr7	-	73737220	73737735	73737561	73737735	73736928	73737110	136127	15,11	113,79	4,2	0.0418345	0.819,0.852	0.934,0.952	-0.108	NA
ENSG00000107404.17	DVL1	chr1	-	1339286	1339439	1339361	1339439	1338521	1338653	79112	49,56	127124	44,23	0.0399053	0.448,0.502	0.592,0.731	-0.186	NA
ENSG00000107864.14	CPEB3	chr10	-	92192476	92192636	92192545	92192636	92180962	92181019	1,3	7,17	11,6	13,5	0.0204467	0.07,0.085	0.307,0.386	-0.269	NA
ENSG00000108591.9	DRG2	chr17	+	18099016	18099093	18099016	18099077	18099632	18100435	2,6	52,63	13,5	38,24	0.0197676	0.031,0.074	0.222,0.148	-0.133	NA
ENSG00000108788.11	MLX	chr17	+	42567071	42567328	42567071	42567166	42567618	42567655	5,6	13,12	1,1	18,22	0.00923829	0.161,0.2	0.027,0.022	0.156	NA
ENSG00000109180.14	OCIAD1	chr4	+	48831226	48831398	48831226	48831249	48832619	48832682	20,27	134170	43,44	102,94	0.000222781	0.069,0.074	0.174,0.19	-0.11	NA
ENSG00000109686.17	SH3D19	chr4	-	151176524	151176687	151176533	151176687	151174669	151175674	1,0	34,38	3,4	29,14	0.02499	0.026,0.0	0.085,0.205	-0.132	0.159
ENSG00000110514.19	MADD	chr11	+	47295495	47295579	47295495	47295567	47295896	47296055	46,39	23,43	15,7	64,53	6.81862e-06	0.636,0.442	0.17,0.103	0.403	NA
ENSG00000110514.19	MADD	chr11	+	47295495	47295576	47295495	47295567	47295896	47296055	37,33	23,43	27,6	64,53	0.00620589	0.592,0.409	0.276,0.093	0.316	NA
ENSG00000113240.12	CLK4	chr5	-	178617343	178618778	178618555	178618778	178616881	178616948	23,42	12,7	67,57	2,3	0.00496587	0.489,0.75	0.944,0.905	-0.305	NA
ENSG00000113645.13	WWC1	chr5	+	168441681	168441849	168441681	168441834	168444493	168444585	4,3	15,17	0,0	12,7	0.0194136	0.183,0.129	0.0,0.0	0.156	NA
ENSG00000114388.12	NPRL2	chr3	-	50349912	50350022	50349930	50350022	50349385	50349494	4,1	6,7	3,7	2,1	0.0488931	0.352,0.104	0.55,0.851	-0.473	NA
ENSG00000115282.19	TTC31	chr2	+	74483321	74483563	74483321	74483410	74490243	74490473	3,1	11,9	9,8	3,1	0.000273246	0.12,0.053	0.6,0.8	-0.613	NA
ENSG00000115459.17	ELMOD3	chr2	+	85371085	85371562	85371085	85371209	85377343	85377474	20,12	6,4	11,5	0,0	0.0007828	0.625,0.6	1.0,1.0	-0.387	NA
ENSG00000115459.17	ELMOD3	chr2	+	85355554	85355896	85355554	85355716	85356966	85357252	17,13	0,0	11,3	3,1	0.0106418	1.0,1.0	0.647,0.6	0.377	NA
ENSG00000115459.17	ELMOD3	chr2	+	85355554	85355784	85355554	85355716	85356966	85357252	13,12	0,0	9,2	3,1	0.0125214	1.0,1.0	0.613,0.514	0.436	NA
ENSG00000117222.13	RBBP5	chr1	-	205094872	205095064	205094986	205095064	205086141	205088815	21,32	6,22	22,30	4,1	0.0332406	0.636,0.421	0.733,0.938	-0.307	NA
ENSG00000118513.18	MYB	chr6	+	135194355	135194460	135194355	135194451	135195747	135195917	70,64	9,7	22,5	0,0	0.0106384	0.875,0.892	1.0,1.0	-0.117	NA
ENSG00000118518.15	RNF146	chr6	+	127266882	127267095	127266882	127266925	127280230	127280340	14,21	6,2	33,50	1,1	0.019492	0.538,0.84	0.943,0.962	-0.263	NA
ENSG00000124782.19	RREB1	chr6	+	7181123	7181289	7181123	7181246	7181869	7182082	14,8	41,49	31,23	53,31	0.0245305	0.18,0.095	0.273,0.322	-0.16	NA
ENSG00000125454.11	SLC25A19	chr17	-	75288387	75288591	75288501	75288591	75286632	75286802	12,5	8,5	2,3	1,0	0.0453586	0.429,0.333	0.5,1.0	-0.369	NA
ENSG00000126107.14	HECTD3	chr1	-	45005793	45006116	45005996	45006116	45004599	45004806	51,41	3,6	38,29	0,0	0.00455214	0.895,0.774	1.0,1.0	-0.165	NA
ENSG00000126214.21	KLC1	chr14	+	103679383	103679545	103679383	103679518	103684985	103685036	36,33	20,27	19,26	32,53	0.0109171	0.572,0.476	0.306,0.267	0.238	NA
ENSG00000127314.17	RAP1B	chr12	+	68610924	68611052	68610924	68611043	68654111	68654252	4,6	0,0	9,18	3,15	0.000678197	1.0,1.0	0.731,0.52	0.375	NA
ENSG00000128833.12	MYO5C	chr15	-	52260861	52261127	52260901	52261127	52256638	52256720	14,15	8,12	6,8	16,22	0.019492	0.535,0.451	0.198,0.193	0.297	-0.612
ENSG00000128928.8	IVD	chr15	+	40407635	40407812	40407635	40407725	40407938	40407990	19,23	84103	31,28	67,29	0.00980215	0.102,0.1	0.188,0.326	-0.156	0.162
ENSG00000130714.15	POMT1	chr9	+	131511336	131511472	131511336	131511467	131512040	131512136	30,36	194207	52,45	147118	0.00350417	0.128,0.142	0.251,0.266	-0.123	0.113
ENSG00000130714.15	POMT1	chr9	+	131509902	131510062	131509902	131509996	131510259	131510415	53,43	57,44	54,60	27,30	0.027452	0.332,0.344	0.517,0.517	-0.179	NA
ENSG00000132424.14	PNISR	chr6	-	99403828	99404702	99404602	99404702	99402539	99402710	111100	14,31	84,66	46,41	0.0129241	0.799,0.617	0.477,0.446	0.246	-0.645
ENSG00000132436.11	FIGNL1	chr7	-	50449544	50449723	50449562	50449723	50448180	50448289	0,0	6,4	5,2	6,3	0.00139447	0.0,0.0	0.405,0.352	-0.379	NA
ENSG00000135473.14	PAN2	chr12	-	56324036	56324185	56324048	56324185	56323806	56323913	20,28	38,53	5,3	50,18	0.00192404	0.315,0.315	0.08,0.127	0.211	NA
ENSG00000135506.15	OS9	chr12	+	57718992	57720263	57718992	57719182	57720405	57720518	527747	510557	662599	321200	5.18884e-05	0.341,0.401	0.508,0.6	-0.183	NA
ENSG00000135597.18	REPS1	chr6	-	138926400	138930098	138929976	138930098	138921036	138921124	91115	24,44	79,18	42,46	0.0488931	0.655,0.567	0.485,0.164	0.286	NA
ENSG00000137312.14	FLOT1	chr6	-	30741189	30741704	30741613	30741704	30740678	30740798	463702	42,64	440313	98101	3.12193e-07	0.846,0.846	0.692,0.608	0.196	-0.139
ENSG00000137817.16	PARP6	chr15	-	72265269	72265473	72265412	72265473	72265080	72265171	47,52	173200	53,81	139,76	0.0245305	0.12,0.115	0.16,0.348	-0.137	0.123
ENSG00000138035.14	PNPT1	chr2	-	55644636	55645432	55645348	55645432	55643318	55643425	28,46	0,0	19,14	0,5	0.0372232	1.0,1.0	1.0,0.583	0.209	NA
ENSG00000138674.16	SEC31A	chr4	-	82842139	82842481	82842184	82842481	82828999	82829058	48,86	38,73	56,41	72,87	0.0347934	0.443,0.426	0.329,0.229	0.155	NA
ENSG00000138688.15	KIAA1109	chr4	+	122334343	122334545	122334343	122334440	122336191	122336353	10,19	88,96	28,33	63,30	0.0004419	0.054,0.09	0.182,0.355	-0.196	0.101
ENSG00000141527.16	CARD14	chr17	+	80204226	80204351	80204226	80204341	80205034	80205205	1,0	13,3	6,8	5,8	0.000350509	0.064,0.0	0.517,0.472	-0.463	NA
ENSG00000141577.13	CEP131	chr17	-	81198105	81198297	81198114	81198297	81197711	81197888	9,13	17,19	15,14	6,3	0.00599647	0.324,0.382	0.693,0.808	-0.397	NA
ENSG00000142794.18	NBPF3	chr1	+	21478143	21478307	21478143	21478196	21479348	21479400	25,32	4,2	18,7	0,0	0.0129241	0.758,0.889	1.0,1.0	-0.176	0.189
ENSG00000143537.13	ADAM15	chr1	+	155061903	155062117	155061903	155061975	155062244	155062369	5,13	31,18	15,22	4,5	5.18884e-05	0.075,0.265	0.652,0.688	-0.5	NA
ENSG00000143702.15	CEP170	chr1	-	243142315	243142463	243142366	243142463	243139936	243140107	12,10	5,8	2,0	2,7	0.0280488	0.59,0.429	0.375,0.0	0.322	-0.649
ENSG00000144357.16	UBR3	chr2	+	170006989	170007202	170006989	170007190	170008803	170008940	11,9	31,24	4,2	49,42	0.00484074	0.236,0.246	0.066,0.04	0.188	-0.27
ENSG00000145191.11	EIF2B5	chr3	+	184142236	184142394	184142236	184142378	184142501	184142603	7,7	91,91	12,23	69,51	0.0069367	0.06,0.06	0.127,0.273	-0.14	NA
ENSG00000145833.15	DDX46	chr5	+	134816429	134816606	134816429	134816603	134817495	134817714	53,58	19,12	47,50	2,5	0.0127775	0.731,0.825	0.958,0.907	-0.154	NA
ENSG00000147144.12	CCDC120	chrX	+	49061958	49062104	49061958	49062058	49062234	49062325	26,27	5,1	16,24	0,0	0.0172443	0.765,0.944	1.0,1.0	-0.145	NA
ENSG00000148225.15	WDR31	chr9	-	113331906	113332050	113331977	113332050	113328880	113328955	11,13	1,0	3,1	1,3	0.00496587	0.851,1.0	0.608,0.147	0.548	NA
ENSG00000149532.15	CPSF7	chr11	-	61420469	61421608	61421389	61421608	61419921	61420094	50,54	2,4	40,41	7,10	0.0488931	0.926,0.871	0.741,0.672	0.192	-0.371
ENSG00000151148.13	UBE3B	chr12	+	109477652	109478109	109477652	109477776	109481636	109481742	43,47	0,1	29,15	1,6	0.0117882	1.0,0.959	0.935,0.556	0.234	NA
ENSG00000151632.16	AKR1C2	chr10	-	4999199	5000666	5000549	5000666	4998624	4998747	251258	26,57	73,36	55,84	2.94064e-07	0.828,0.694	0.399,0.176	0.473	-0.124
ENSG00000152556.15	PFKM	chr12	+	48134942	48135383	48134942	48135038	48137720	48137846	49,95	45,59	82,56	20,14	0.00106712	0.353,0.446	0.672,0.667	-0.27	NA
ENSG00000160193.11	WDR4	chr21	-	42873550	42873691	42873602	42873691	42863439	42863596	7,2	8,5	1,0	5,1	0.0343068	0.342,0.192	0.106,0.0	0.214	-0.558
ENSG00000160710.15	ADAR	chr1	-	154590183	154590409	154590261	154590409	154589756	154589928	185227	70,60	218131	24,11	5.2281e-05	0.569,0.654	0.82,0.856	-0.227	0.226
ENSG00000161996.17	WDR90	chr16	+	653745	655147	653745	653803	655306	655468	10,14	5,5	25,24	1,0	0.000229379	0.5,0.583	0.926,1.0	-0.422	NA
ENSG00000162298.16	SYVN1	chr11	-	65132247	65132780	65132731	65132780	65131469	65131596	41,58	1,0	42,32	2,10	0.00261465	0.953,1.0	0.913,0.615	0.212	NA
ENSG00000162910.18	MRPL55	chr1	-	228108436	228109021	228108954	228109021	228108234	228108318	23,41	25,27	59,55	15,10	0.00139447	0.315,0.432	0.663,0.733	-0.324	NA
ENSG00000162923.14	WDR26	chr1	-	224431476	224431581	224431524	224431581	224424517	224424719	23,24	0,0	38,27	2,4	0.030201	1.0,1.0	0.921,0.806	0.136	NA
ENSG00000163138.18	PACRGL	chr4	+	20700458	20700787	20700458	20700706	20704465	20704533	17,17	0,0	17,15	1,5	0.00397687	1.0,1.0	0.895,0.6	0.252	NA
ENSG00000163660.11	CCNL1	chr3	-	157151728	157151930	157151916	157151930	157150281	157150381	2,19	8,7	18,30	4,0	0.0209633	0.111,0.576	0.692,1.0	-0.502	NA
ENSG00000163702.18	IL17RC	chr3	+	9923880	9924137	9923880	9924020	9924231	9924291	41,69	38,56	36,32	15,10	0.0418345	0.35,0.381	0.545,0.615	-0.215	NA
ENSG00000165410.14	CFL2	chr14	-	34713253	34713561	34713396	34713561	34713059	34713136	45,67	13,9	88,86	4,4	0.013598	0.634,0.788	0.917,0.915	-0.205	0.368
ENSG00000166311.9	SMPD1	chr11	+	6391383	6392196	6391383	6392156	6393215	6393387	4,4	6,5	1,0	8,10	0.00564006	0.305,0.345	0.076,0.0	0.287	NA
ENSG00000166946.13	CCNDBP1	chr15	+	43185819	43186233	43185819	43185879	43189198	43189280	44,52	3,5	33,22	1,0	0.0488931	0.88,0.839	0.943,1.0	-0.112	NA
ENSG00000167193.7	CRK	chr17	-	1436619	1437155	1436789	1437155	1420688	1423650	52,92	96,85	82,61	51,34	0.027452	0.213,0.351	0.446,0.473	-0.178	0.101
ENSG00000168385.17	SEPT2	chr2	+	241316421	241316555	241316421	241316540	241317498	241317599	1,3	11,11	5,6	0,1	5.20792e-06	0.071,0.187	1.0,0.835	-0.788	NA
ENSG00000168488.18	ATXN2L	chr16	+	28835932	28836485	28835932	28836122	28836727	28837237	92129	42,65	156174	33,29	0.000343116	0.523,0.498	0.703,0.75	-0.216	NA
ENSG00000168872.16	DDX19A	chr16	+	70361417	70361636	70361417	70361510	70364542	70364645	13,15	62,46	19,21	30,10	0.0197676	0.095,0.14	0.241,0.512	-0.259	NA
ENSG00000170004.16	CHD3	chr17	+	7909142	7909384	7909142	7909338	7910427	7910591	83,89	102134	91,90	72,68	0.0278644	0.337,0.293	0.441,0.453	-0.132	NA
ENSG00000170037.13	CNTROB	chr17	+	7948486	7948685	7948486	7948619	7949084	7949157	40,56	44,33	82134	28,12	0.00554034	0.328,0.476	0.611,0.857	-0.332	NA
ENSG00000170632.13	ARMC10	chr7	+	103083681	103084062	103083681	103083830	103086629	103086764	39,46	49,63	64,60	36,35	0.00777297	0.285,0.267	0.471,0.462	-0.191	NA
ENSG00000170949.17	ZNF160	chr19	-	53091412	53091720	53091636	53091720	53086261	53086321	65115	42,47	86121	14,3	5.3425e-05	0.436,0.55	0.754,0.953	-0.36	NA
ENSG00000179195.15	ZNF664	chr12	+	123973218	123973352	123973218	123973303	123973885	123974553	11,14	1,7	3,5	0,0	0.00256808	0.87,0.549	1.0,1.0	-0.29	NA
ENSG00000180104.15	EXOC3	chr5	+	462156	462529	462156	462307	464289	465272	26,38	121109	37,47	71,60	0.00725969	0.097,0.148	0.207,0.281	-0.121	NA
ENSG00000181991.15	MRPS11	chr15	+	88467907	88469145	88467907	88468024	88472626	88472725	15,18	60,75	25,28	48,39	0.018123	0.111,0.107	0.207,0.264	-0.127	NA
ENSG00000186577.11	C6orf1	chr6	-	34247680	34247864	34247740	34247864	34247043	34247149	26,29	0,0	51,31	4,4	0.0104849	1.0,1.0	0.877,0.813	0.155	NA
ENSG00000186716.19	BCR	chr22	+	23311696	23311918	23311696	23311836	23312886	23313021	1,2	44,46	12,9	36,14	5.3425e-05	0.011,0.021	0.143,0.243	-0.177	0.116
ENSG00000196155.12	PLEKHG4	chr16	+	67277509	67280806	67277509	67280543	67280881	67281005	15,16	0,0	9,0	3,1	0.0169954	1.0,1.0	0.6,0.0	0.7	NA
ENSG00000196262.13	PPIA	chr7	+	44798747	44798904	44798747	44798814	44799246	44799277	418462	335335	430470	207208	0.00364701	0.384,0.408	0.509,0.53	-0.124	NA
ENSG00000196975.15	ANXA4	chr2	+	69810593	69811456	69810593	69810673	69812652	69812709	8,6	208271	9,12	68,29	5.91181e-05	0.019,0.011	0.062,0.171	-0.102	NA
ENSG00000197062.11	ZSCAN26	chr6	+	28271853	28272339	28271853	28272336	28272669	28272787	13,19	8,4	1,1	0,0	0.00666503	0.613,0.822	1.0,1.0	-0.282	NA
ENSG00000197062.11	ZSCAN26	chr6	+	28271853	28272336	28271853	28271934	28272669	28272787	33,34	3,4	14,8	0,0	0.0164988	0.846,0.81	1.0,1.0	-0.172	NA
ENSG00000197062.11	ZSCAN26	chr6	+	28271853	28272339	28271853	28271934	28272669	28272787	35,48	3,4	14,8	0,0	0.0264217	0.854,0.857	1.0,1.0	-0.145	NA
ENSG00000197530.12	MIB2	chr1	+	1623430	1623679	1623430	1623482	1623773	1623945	68,89	10,6	49,48	1,1	0.0245305	0.773,0.881	0.961,0.96	-0.133	NA
ENSG00000198001.13	IRAK4	chr12	+	43772911	43773072	43772911	43772986	43773964	43774029	45,77	4,8	55,37	1,0	0.00564006	0.849,0.828	0.965,1.0	-0.144	NA
ENSG00000198561.13	CTNND1	chr11	+	57761796	57762068	57761796	57762046	57795576	57795729	5,8	21,40	0,3	52106	0.000697874	0.157,0.135	0.0,0.022	0.135	NA
ENSG00000198561.13	CTNND1	chr11	+	57761796	57762119	57761796	57762046	57795576	57795729	38,41	21,40	52,16	52106	0.0488931	0.48,0.343	0.338,0.072	0.206	NA
ENSG00000205707.10	LYRM5	chr12	+	25195215	25195341	25195215	25195337	25203919	25204007	1,1	35,19	5,3	8,8	0.00554034	0.027,0.048	0.375,0.265	-0.283	NA
ENSG00000206149.10	HERC2P9	chr15	+	28655272	28655691	28655272	28655420	28655795	28656026	8,3	9,7	4,2	0,1	0.0172443	0.308,0.176	1.0,0.5	-0.508	NA
ENSG00000213918.10	DNASE1	chr16	+	3655848	3655966	3655848	3655937	3656101	3656185	15,20	56,93	32,34	67,53	0.0182735	0.163,0.135	0.258,0.318	-0.139	NA
ENSG00000215041.9	NEURL4	chr17	-	7324798	7324980	7324910	7324980	7324394	7324480	22,20	2,3	30,20	0,0	0.027452	0.846,0.769	1.0,1.0	-0.193	NA
ENSG00000215883.9	CYB5RL	chr1	-	54190737	54190896	54190747	54190896	54187651	54187739	5,3	9,9	0,0	6,2	0.00350417	0.332,0.229	0.0,0.0	0.281	NA
ENSG00000225138.7	CTD-2228K2.7	chr5	+	477243	477465	477243	477336	477805	477849	130111	15,20	82,74	3,0	0.000297064	0.813,0.735	0.932,1.0	-0.192	NA

## Sheet: siMBNL2_A3SS
GENCODE_GeneID	geneSymbol	chr	strand	longExonStart_0base	longExonEnd	shortES	shortEE	flankingES	flankingEE	IJC_SAMPLE_1	SJC_SAMPLE_1	IJC_SAMPLE_2	SJC_SAMPLE_2	FDR	IncLevel1	IncLevel2	siMBNL2.IncLevelDifference	MCF-7.IncLevelDifference
ENSG00000000457.13	SCYL3	chr1	-	169868927	169869128	169868927	169869039	169870254	169870357	8,4	34,31	14,6	21,5	0.0377469	0.105,0.061	0.25,0.375	-0.23	NA
ENSG00000001631.14	KRIT1	chr7	-	92235402	92236542	92235402	92235646	92237666	92237759	82,90	0,0	49,11	1,5	0.0195939	1.0,1.0	0.961,0.524	0.258	NA
ENSG00000005448.16	WDR54	chr2	+	74423190	74423385	74423318	74423385	74422869	74422932	9,13	186205	31,66	148164	1.97709e-08	0.024,0.031	0.095,0.168	-0.104	NA
ENSG00000011275.18	RNF216	chr7	-	5740972	5741815	5740972	5741644	5752845	5752979	18,26	3,5	21,18	13,21	0.0137823	0.75,0.722	0.447,0.3	0.362	NA
ENSG00000013573.16	DDX11	chr12	+	31089839	31090094	31089885	31090094	31089402	31089490	0,0	17,25	2,6	7,7	0.00123661	0.0,0.0	0.152,0.349	-0.251	NA
ENSG00000023041.11	ZDHHC6	chr10	-	112443514	112443606	112443514	112443594	112445169	112445650	45,47	5,6	43,20	1,0	0.0208492	0.887,0.872	0.974,1.0	-0.108	NA
ENSG00000028203.17	VEZT	chr12	+	95299093	95301172	95300164	95301172	95296050	95296258	17,40	116128	60112	125,87	0.00232542	0.068,0.135	0.194,0.392	-0.192	NA
ENSG00000032444.15	PNPLA6	chr19	+	7535788	7536020	7535932	7536020	7535508	7535577	12,36	3,7	32,15	0,1	0.0067805	0.667,0.72	1.0,0.882	-0.248	NA
ENSG00000040633.12	PHF23	chr17	-	7235929	7236767	7235929	7236566	7237384	7237477	12,23	5,4	22,12	1,0	0.00939014	0.545,0.742	0.917,1.0	-0.315	NA
ENSG00000051825.14	MPHOSPH9	chr12	-	123221371	123221895	123221371	123221723	123223037	123223127	35,38	3,4	57,27	0,0	0.0136978	0.854,0.826	1.0,1.0	-0.16	NA
ENSG00000059769.19	DNAJC25	chr9	+	111642838	111643094	111642856	111643094	111631359	111631743	6,10	10,17	10,26	6,7	0.0325547	0.328,0.324	0.576,0.752	-0.338	NA
ENSG00000061938.16	TNK2	chr3	-	195867168	195867264	195867168	195867258	195867360	195868709	49,62	2,1	44,30	9,4	0.0162972	0.958,0.983	0.821,0.875	0.122	NA
ENSG00000081014.10	AP4E1	chr15	+	50934535	50934697	50934623	50934697	50930804	50930971	0,1	6,9	5,4	6,3	0.00474399	0.0,0.053	0.294,0.4	-0.32	NA
ENSG00000085831.15	TTC39A	chr1	-	51309260	51309430	51309260	51309325	51311253	51311321	25,30	106129	33,26	68,39	0.0164811	0.105,0.104	0.195,0.25	-0.118	-0.139
ENSG00000089060.11	SLC8B1	chr12	-	113316525	113316656	113316525	113316624	113316941	113317001	12,19	3,3	13,10	0,0	0.0173399	0.739,0.818	1.0,1.0	-0.222	NA
ENSG00000090372.14	STRN4	chr19	-	46727451	46727567	46727451	46727546	46727893	46728007	18,20	60,76	34,46	63,70	0.0433059	0.191,0.172	0.299,0.342	-0.139	NA
ENSG00000092148.12	HECTD1	chr14	-	31128611	31129448	31128611	31129307	31133237	31133414	77,97	70,54	144118	37,20	0.000283221	0.355,0.473	0.661,0.747	-0.29	NA
ENSG00000095485.16	CWF19L1	chr10	-	100260965	100261044	100260965	100261028	100261978	100262063	22,17	14,7	18,16	2,0	0.00274802	0.567,0.669	0.882,1.0	-0.323	NA
ENSG00000100416.12	TRMU	chr22	+	46350290	46350463	46350345	46350463	46346421	46346544	28,26	14,21	50,19	9,3	0.0189321	0.538,0.419	0.764,0.786	-0.296	NA
ENSG00000100429.17	HDAC10	chr22	-	50249327	50249516	50249327	50249454	50249634	50249703	0,1	22,33	3,5	16,19	0.0262949	0.0,0.016	0.094,0.127	-0.103	NA
ENSG00000100813.14	ACIN1	chr14	-	23064104	23064257	23064104	23064221	23064354	23064485	94106	29,32	117148	15,20	0.0216024	0.688,0.693	0.842,0.835	-0.148	NA
ENSG00000102081.13	FMR1	chrX	+	147944868	147945051	147944943	147945051	147943130	147943326	221213	15,40	220193	10,6	0.0139453	0.881,0.728	0.917,0.942	-0.125	0.282
ENSG00000103544.14	C16orf62	chr16	+	19569243	19569591	19569423	19569591	19564850	19564950	5,8	24,20	0,1	20,11	0.0123181	0.094,0.167	0.0,0.043	0.109	NA
ENSG00000104129.9	DNAJC17	chr15	-	40776195	40776401	40776195	40776292	40776541	40776627	3,1	50,67	4,13	41,22	0.00424187	0.029,0.007	0.047,0.228	-0.12	NA
ENSG00000105520.10	PLPPR2	chr19	+	11359531	11359720	11359606	11359720	11357659	11357739	92126	13,23	92,79	5,2	0.00696542	0.781,0.734	0.903,0.952	-0.17	NA
ENSG00000105618.13	PRPF31	chr19	+	54126499	54126617	54126527	54126617	54124498	54124656	11,6	36,34	1,0	16,19	0.00757444	0.183,0.115	0.044,0.0	0.127	NA
ENSG00000106610.14	STAG3L4	chr7	+	67308576	67309139	67308934	67309139	67305986	67306083	13,15	37,31	3,7	42,39	0.0377229	0.149,0.195	0.034,0.082	0.114	NA
ENSG00000109381.19	ELF2	chr4	-	139071865	139072039	139071865	139072003	139073453	139073567	32,40	24,43	45,48	16,15	0.0139636	0.476,0.388	0.657,0.686	-0.239	0.401
ENSG00000109685.17	WHSC1	chr4	+	1952751	1953524	1953323	1953524	1952104	1952231	18,42	58,74	29,28	18,8	0.00104223	0.134,0.221	0.446,0.636	-0.364	0.255
ENSG00000111912.19	NCOA7	chr6	+	125888938	125889981	125888971	125889981	125885158	125885343	6,4	5,6	10,10	2,0	0.00757444	0.457,0.318	0.778,1.0	-0.502	0.178
ENSG00000114107.8	CEP70	chr3	-	138572858	138572984	138572858	138572914	138591853	138591956	1,9	5,8	8,11	0,3	0.0389944	0.094,0.369	1.0,0.656	-0.597	NA
ENSG00000115163.14	CENPA	chr2	+	26792501	26792833	26792755	26792833	26792130	26792240	4,3	32,52	13,15	46,38	0.0162972	0.059,0.028	0.124,0.165	-0.101	NA
ENSG00000116815.15	CD58	chr1	-	116519230	116519302	116519230	116519267	116521905	116521983	8,16	39,47	3,1	60,27	0.00382535	0.124,0.19	0.033,0.025	0.128	NA
ENSG00000117266.15	CDK18	chr1	+	205530185	205530349	205530258	205530349	205529520	205529563	14,19	102137	34,44	89,54	0.000141397	0.065,0.066	0.163,0.294	-0.163	NA
ENSG00000117360.12	PRPF3	chr1	+	150344375	150344547	150344433	150344547	150344161	150344261	76,99	333370	137257	295323	3.83777e-05	0.115,0.132	0.209,0.311	-0.137	NA
ENSG00000117713.17	ARID1A	chr1	+	26772811	26772987	26772814	26772987	26772499	26772632	45,51	37,72	34,40	100108	0.0107501	0.542,0.408	0.249,0.265	0.218	NA
ENSG00000118200.14	CAMSAP2	chr1	+	200847209	200847292	200847257	200847292	200844781	200844869	80107	8,10	63,20	17,16	0.0136978	0.86,0.868	0.695,0.435	0.299	0.137
ENSG00000123992.18	DNPEP	chr2	-	219386891	219386980	219386891	219386948	219387069	219387163	250246	73,70	283204	45,21	0.00342951	0.708,0.713	0.817,0.873	-0.135	NA
ENSG00000124357.12	NAGK	chr2	+	71075554	71076701	71076603	71076701	71072640	71073594	149164	1,1	95,61	1,9	0.0130343	0.987,0.988	0.979,0.772	0.112	NA
ENSG00000125633.10	CCDC93	chr2	-	117958364	117958481	117958364	117958478	117973907	117973994	30,33	1,8	38,18	0,0	0.0116518	0.967,0.801	1.0,1.0	-0.116	NA
ENSG00000125835.17	SNRPB	chr20	-	2461633	2461939	2461633	2461793	2462635	2462761	424375	105127	422357	68,70	0.0471809	0.669,0.596	0.756,0.718	-0.104	0.113
ENSG00000126254.11	RBM42	chr19	+	35633076	35633252	35633097	35633252	35631330	35631405	53,51	35,45	40,30	57,54	0.0473333	0.545,0.472	0.357,0.305	0.177	NA
ENSG00000127054.18	CPSF3L	chr1	-	1313731	1314105	1313731	1313921	1314300	1314365	1,6	68,72	9,17	53,34	0.00167071	0.007,0.04	0.078,0.2	-0.116	NA
ENSG00000129946.10	SHC2	chr19	-	422145	422456	422145	422379	430683	430747	1,1	5,6	1,1	0,0	2.13981e-05	0.091,0.077	1.0,1.0	-0.916	NA
ENSG00000132773.11	TOE1	chr1	+	45342734	45343002	45342842	45343002	45342383	45342643	6,7	6,3	7,14	1,0	0.00342951	0.333,0.538	0.778,1.0	-0.454	NA
ENSG00000133460.19	SLC2A11	chr22	+	23875116	23875241	23875120	23875241	23868480	23868641	8,12	2,3	11,8	0,0	0.0416935	0.794,0.794	1.0,1.0	-0.206	NA
ENSG00000133794.17	ARNTL	chr11	+	13376544	13376728	13376639	13376728	13375611	13375762	1,0	15,14	3,7	13,1	0.0117884	0.032,0.0	0.103,0.778	-0.424	NA
ENSG00000134644.15	PUM1	chr1	-	30980061	30980178	30980061	30980166	30981311	30981405	3,7	25,40	9,11	10,8	0.00184447	0.095,0.132	0.44,0.545	-0.379	NA
ENSG00000134644.15	PUM1	chr1	-	30980061	30980166	30980061	30980163	30981311	30981405	25,40	58,80	10,8	61,42	0.0202993	0.296,0.328	0.138,0.156	0.165	NA
ENSG00000135968.19	GCC2	chr2	+	108486434	108486648	108486510	108486648	108485830	108485908	6,11	75,68	21,22	70,39	0.00696542	0.038,0.075	0.13,0.22	-0.118	NA
ENSG00000138698.14	RAP1GDS1	chr4	+	98293404	98293515	98293407	98293515	98261485	98261569	17,13	1,2	7,5	4,6	0.0246413	0.943,0.864	0.63,0.448	0.364	NA
ENSG00000140320.11	BAHD1	chr15	+	40465334	40465435	40465343	40465435	40464470	40464547	29,29	29,53	10,6	43,33	0.0132923	0.475,0.331	0.174,0.141	0.246	NA
ENSG00000140400.14	MAN2C1	chr15	-	75359058	75359425	75359058	75359191	75359619	75359775	56,59	0,1	31,35	1,6	0.019362	1.0,0.967	0.939,0.745	0.142	NA
ENSG00000140553.16	UNC45A	chr15	+	90936136	90936460	90936284	90936460	90935945	90935982	7,12	98,85	21,41	39,34	5.53926e-07	0.034,0.066	0.212,0.376	-0.244	-0.185
ENSG00000140983.13	RHOT2	chr16	+	668487	668699	668655	668699	668352	668411	76,83	6,6	67,74	1,1	0.0416935	0.864,0.874	0.971,0.974	-0.103	NA
ENSG00000141959.16	PFKL	chr21	+	44325731	44326060	44325960	44326060	44325152	44325264	198222	514615	151201	237197	0.000294535	0.162,0.153	0.242,0.338	-0.133	NA
ENSG00000142046.14	TMEM91	chr19	+	41383714	41384083	41383885	41384083	41382771	41382921	67,61	8,6	66,67	2,1	0.0416935	0.807,0.836	0.943,0.971	-0.135	NA
ENSG00000143416.20	SELENBP1	chr1	-	151365767	151366453	151365767	151365846	151366721	151366904	88,92	21,21	60,37	27,30	0.0370555	0.677,0.687	0.526,0.381	0.229	0.107
ENSG00000143748.17	NVL	chr1	-	224313049	224313155	224313049	224313151	224317693	224317793	7,2	5,5	1,0	5,1	0.0353079	0.574,0.278	0.161,0.0	0.345	NA
ENSG00000144228.8	SPOPL	chr2	+	138550902	138551054	138550973	138551054	138550482	138550604	131169	29,33	223184	15,15	0.00274802	0.7,0.726	0.885,0.864	-0.162	NA
ENSG00000147576.15	ADHFE1	chr8	+	66453709	66454157	66454058	66454157	66451952	66452105	15,19	2,9	9,3	0,0	0.00189534	0.789,0.514	1.0,1.0	-0.349	NA
ENSG00000158856.17	DMTN	chr8	+	22069015	22069518	22069418	22069518	22067526	22067682	57,36	1,1	40,19	7,9	0.0011309	0.966,0.947	0.741,0.514	0.329	NA
ENSG00000161204.11	ABCF3	chr3	+	184187363	184187443	184187396	184187443	184186795	184186875	20,9	104,78	18,50	62,29	0.0484088	0.119,0.075	0.169,0.547	-0.261	NA
ENSG00000163374.19	YY1AP1	chr1	-	155668626	155668777	155668626	155668717	155670319	155670464	121144	53,72	161198	36,20	0.000655205	0.561,0.528	0.715,0.847	-0.236	NA
ENSG00000163482.11	STK36	chr2	+	218696526	218696601	218696589	218696601	218694524	218694635	14,8	20,17	2,2	30,25	0.00139499	0.277,0.205	0.035,0.042	0.202	NA
ENSG00000163785.12	RYK	chr3	-	134191848	134191983	134191848	134191974	134195081	134195182	80,83	86102	61,41	119123	0.0105233	0.457,0.424	0.317,0.231	0.166	0.186
ENSG00000164050.12	PLXNB1	chr3	-	48419576	48420257	48419576	48419674	48420664	48420773	13,13	5,2	4,2	0,0	0.00228196	0.565,0.765	1.0,1.0	-0.335	NA
ENSG00000165138.17	ANKS6	chr9	-	98756419	98756606	98756419	98756603	98768080	98768250	3,10	16,8	0,0	9,2	0.00278443	0.154,0.549	0.0,0.0	0.352	NA
ENSG00000165609.12	NUDT5	chr10	-	12170716	12170908	12170716	12170770	12172764	12172866	22,31	1,5	38,25	0,0	0.0136978	0.917,0.756	1.0,1.0	-0.163	NA
ENSG00000166333.13	ILK	chr11	+	6604179	6604360	6604225	6604360	6603730	6603822	35,40	19,15	36,38	6,1	0.0105335	0.535,0.625	0.789,0.96	-0.294	NA
ENSG00000167522.14	ANKRD11	chr16	-	89316932	89317078	89316932	89317075	89418283	89418368	44,65	33,51	32,34	57,52	0.0302755	0.565,0.554	0.354,0.389	0.188	NA
ENSG00000167543.15	TP53I13	chr17	+	29571831	29572057	29571856	29572057	29569317	29569359	15,9	2,3	4,4	10,4	0.0202993	0.85,0.694	0.233,0.431	0.44	NA
ENSG00000167550.10	RHEBL1	chr12	-	49069034	49069174	49069034	49069106	49069733	49070025	1,0	6,6	2,5	0,1	2.13981e-05	0.081,0.0	1.0,0.725	-0.822	NA
ENSG00000167646.13	DNAAF3	chr19	-	55159532	55159720	55159532	55159607	55159898	55160013	11,10	4,4	2,2	7,3	0.0404351	0.579,0.556	0.125,0.25	0.38	NA
ENSG00000167925.15	GHDC	chr17	-	42192905	42193101	42192905	42193027	42193316	42193594	0,2	19,21	7,2	10,11	0.0284054	0.0,0.046	0.262,0.084	-0.15	NA
ENSG00000168010.10	ATG16L2	chr11	+	72821198	72821741	72821667	72821741	72817755	72817855	58,60	14,3	54,89	3,0	0.0192188	0.674,0.909	0.9,1.0	-0.158	0.405
ENSG00000168010.10	ATG16L2	chr11	+	72826517	72827293	72827187	72827293	72826172	72826243	52,32	1,5	52,76	0,0	0.0392749	0.963,0.762	1.0,1.0	-0.137	NA
ENSG00000168036.16	CTNNB1	chr3	+	41239659	41240443	41239818	41240443	41239133	41239354	457508	134128	651713	125,49	0.00774602	0.63,0.665	0.723,0.879	-0.153	NA
ENSG00000168137.15	SETD5	chr3	+	9445619	9445740	9445656	9445740	9445047	9445300	5,22	185237	45,80	210149	2.15344e-07	0.018,0.059	0.126,0.266	-0.158	NA
ENSG00000168872.16	DDX19A	chr16	+	70365932	70366262	70366084	70366262	70365016	70365131	10,10	63,79	23,23	39,12	0.000657096	0.074,0.06	0.228,0.489	-0.291	0.212
ENSG00000168894.9	RNF181	chr2	+	85596952	85597178	85597103	85597178	85596518	85596649	58,97	28,30	156259	29,19	0.00487913	0.509,0.618	0.729,0.872	-0.237	0.232
ENSG00000169519.20	METTL15	chr11	+	28296752	28296931	28296796	28296931	28290205	28290397	33,74	9,10	61,61	3,2	0.0317976	0.7,0.825	0.928,0.951	-0.177	NA
ENSG00000169592.14	INO80E	chr16	+	30001211	30001530	30001413	30001530	30000928	30001040	78,91	324404	126,99	311155	0.000464012	0.107,0.101	0.168,0.242	-0.101	NA
ENSG00000169738.7	DCXR	chr17	-	82036190	82036448	82036190	82036308	82036543	82036643	43,75	8,8	60,58	0,2	0.00433192	0.729,0.824	1.0,0.935	-0.191	NA
ENSG00000170004.16	CHD3	chr17	+	7894114	7894265	7894126	7894265	7893804	7893935	72,81	78109	48,20	107,97	0.00483024	0.446,0.393	0.281,0.152	0.203	NA
ENSG00000170037.13	CNTROB	chr17	+	7936237	7936482	7936365	7936482	7934988	7935145	40,39	69,81	48,82	46,31	0.0172237	0.225,0.194	0.343,0.569	-0.246	0.161
ENSG00000171307.18	ZDHHC16	chr10	+	97455638	97455783	97455713	97455783	97454713	97454799	80,90	5,9	54,28	0,0	0.00342951	0.89,0.834	1.0,1.0	-0.138	NA
ENSG00000171307.18	ZDHHC16	chr10	+	97455659	97455783	97455713	97455783	97454713	97454799	85101	5,9	53,32	0,0	0.00561589	0.909,0.868	1.0,1.0	-0.111	NA
ENSG00000172057.9	ORMDL3	chr17	-	39924029	39924225	39924029	39924220	39927483	39927601	25,24	11,13	24,35	2,6	0.0448371	0.683,0.637	0.919,0.847	-0.223	NA
ENSG00000172530.19	BANP	chr16	+	88035322	88035394	88035331	88035394	88033108	88033245	34,26	15,17	8,8	26,14	0.00416567	0.672,0.58	0.218,0.341	0.346	NA
ENSG00000174485.15	DENND4A	chr15	-	65700543	65700675	65700543	65700672	65701050	65701192	4,3	6,6	1,0	6,2	0.040139	0.394,0.328	0.14,0.0	0.291	NA
ENSG00000176531.10	PHLDB3	chr19	-	43479376	43479593	43479376	43479491	43486265	43486322	10,18	1,4	17,12	0,0	0.0172261	0.833,0.692	1.0,1.0	-0.238	NA
ENSG00000177981.10	ASB8	chr12	-	48153367	48153529	48153367	48153525	48157458	48157502	17,21	1,2	8,5	10,10	2.87494e-05	0.942,0.91	0.435,0.325	0.546	NA
ENSG00000183963.18	SMTN	chr22	+	31088453	31088606	31088512	31088606	31087964	31088113	4,17	44,44	22,26	28,21	0.00342951	0.049,0.179	0.307,0.411	-0.245	NA
ENSG00000183963.18	SMTN	chr22	+	31095851	31096897	31096732	31096897	31095533	31095609	20,19	75,86	26,53	56,26	0.0336906	0.118,0.099	0.188,0.505	-0.238	NA
ENSG00000184792.15	OSBP2	chr22	+	30906193	30907824	30906196	30907824	30905836	30906069	4,1	8,10	0,0	8,4	0.0396777	0.328,0.089	0.0,0.0	0.209	NA
ENSG00000184863.10	RBM33	chr7	+	155711172	155711455	155711202	155711455	155706859	155707068	13,24	23,21	46,49	11,9	0.000387228	0.29,0.452	0.751,0.797	-0.403	NA
ENSG00000184867.13	ARMCX2	chrX	-	101659075	101659148	101659075	101659136	101659418	101659501	13,21	2,8	16,2	0,0	0.00363425	0.85,0.696	1.0,1.0	-0.227	NA
ENSG00000184939.15	ZFP90	chr16	+	68558374	68558568	68558472	68558568	68557997	68558124	46,55	27,41	35,21	7,6	0.0421458	0.46,0.401	0.714,0.636	-0.245	NA
ENSG00000185347.17	C14orf80	chr14	+	105492106	105492309	105492147	105492309	105491621	105491700	86,86	20,16	74,44	7,1	0.0429433	0.737,0.778	0.873,0.966	-0.162	NA
ENSG00000186166.8	CCDC84	chr11	+	119015287	119015439	119015306	119015439	119014993	119015083	1,2	45,53	11,16	51,71	0.00151286	0.018,0.03	0.148,0.154	-0.127	NA
ENSG00000188313.12	PLSCR1	chr3	-	146521832	146522053	146521832	146521981	146525604	146525647	42,40	1,5	25,9	0,0	0.0455681	0.956,0.804	1.0,1.0	-0.12	NA
ENSG00000189283.9	FHIT	chr3	-	59749309	59749579	59749309	59749568	59752220	59752321	1,0	6,4	3,4	0,2	0.000464012	0.128,0.0	1.0,0.638	-0.755	NA
ENSG00000196150.13	ZNF250	chr8	-	144889932	144890074	144889932	144890059	144890307	144890403	17,22	29,57	6,6	49,60	0.00324652	0.331,0.245	0.094,0.078	0.202	NA
ENSG00000196323.11	ZBTB44	chr11	-	130238443	130238607	130238443	130238556	130239811	130239896	22,27	2,6	28,12	1,0	0.0262949	0.868,0.73	0.944,1.0	-0.173	NA
ENSG00000196998.16	WDR45	chrX	-	49075544	49075753	49075544	49075663	49075865	49075945	94126	8,4	43,29	0,0	0.0189321	0.855,0.94	1.0,1.0	-0.103	NA
ENSG00000198131.13	ZNF544	chr19	+	58246710	58246794	58246745	58246794	58246300	58246427	34,45	12,15	30,18	4,0	0.0451479	0.661,0.674	0.838,1.0	-0.252	0.212
ENSG00000198520.10	C1orf228	chr1	+	44725032	44725217	44725135	44725217	44724761	44724839	26,26	4,4	19,10	0,1	0.0478671	0.765,0.765	1.0,0.833	-0.151	NA
ENSG00000198925.10	ATG9A	chr2	-	219228433	219228485	219228433	219228482	219229534	219229639	12,3	3,3	12,8	0,1	0.0359122	0.796,0.493	1.0,0.886	-0.298	NA
ENSG00000203780.10	FANK1	chr10	+	126009053	126009592	126009372	126009592	126008406	126008550	53,72	18,20	37,33	24,31	0.021895	0.596,0.643	0.435,0.347	0.228	NA
ENSG00000206195.10	DUXAP8	chr22	+	15790660	15790798	15790684	15790798	15788819	15788931	69,50	17,11	46,26	3,1	0.0222166	0.756,0.777	0.921,0.952	-0.17	NA
ENSG00000213918.10	DNASE1	chr16	+	3656963	3657111	3656998	3657111	3656637	3656753	125110	118166	64,46	169126	0.00362219	0.422,0.313	0.207,0.201	0.163	NA
ENSG00000223959.8	AFG3L1P	chr16	+	89979301	89980336	89980241	89980336	89978809	89978878	8,6	18,9	11,13	5,3	0.0202993	0.182,0.25	0.524,0.684	-0.388	NA
ENSG00000228106.5	RP11-452F19.3	chr1	+	222836922	222837384	222837218	222837384	222835118	222835215	16,16	5,0	21,20	0,0	0.0487336	0.615,1.0	1.0,1.0	-0.193	NA
ENSG00000232940.5	HCG25	chr6	+	33250608	33250711	33250615	33250711	33249789	33249889	7,5	3,7	1,0	4,2	0.0162972	0.684,0.398	0.188,0.0	0.447	NA
ENSG00000243364.7	EFNA4	chr1	+	155068998	155069538	155069018	155069538	155067371	155067440	26,28	5,7	23,32	1,0	0.00322009	0.806,0.761	0.948,1.0	-0.19	NA

## Sheet: siMBNL2_RI
GENCODE_GeneID	geneSymbol	chr	strand	riExonStart_0base	riExonEnd	upstreamES	upstreamEE	downstreamES	downstreamEE	IJC_SAMPLE_1	SJC_SAMPLE_1	IJC_SAMPLE_2	SJC_SAMPLE_2	FDR	IncLevel1	IncLevel2	siMBNL2.IncLevelDifference	MCF-7.IncLevelDifference
ENSG00000003756.16	RBM5	chr3	+	50100531	50103166	50100531	50100605	50103082	50103166	155193	20,20	183211	8,3	0.000321926	0.795,0.828	0.92,0.972	-0.134	0.389
ENSG00000004534.14	RBM6	chr3	+	50061461	50062108	50061461	50061547	50061961	50062108	91108	29,37	97126	16,16	0.0112532	0.611,0.593	0.752,0.797	-0.172	NA
ENSG00000013573.16	DDX11	chr12	+	31089402	31090094	31089402	31089490	31089885	31090094	10,22	17,25	23,35	7,7	0.000239324	0.227,0.306	0.622,0.714	-0.401	NA
ENSG00000038358.14	EDC4	chr16	+	67881264	67881533	67881264	67881417	67881496	67881533	36,31	65,85	48,54	68,38	0.037914	0.217,0.154	0.261,0.415	-0.152	NA
ENSG00000048707.13	VPS13D	chr1	+	12348822	12349374	12348822	12348973	12349163	12349374	2,5	20,20	15,13	12,8	0.000155678	0.048,0.111	0.385,0.448	-0.337	NA
ENSG00000060971.17	ACAA1	chr3	-	38125825	38126700	38125825	38125881	38126509	38126700	13,7	35,42	7,12	10,10	0.0389394	0.157,0.077	0.259,0.375	-0.2	NA
ENSG00000062822.12	POLD1	chr19	+	50401998	50402373	50401998	50402124	50402204	50402373	11,16	20,17	1,6	19,16	0.0358583	0.216,0.32	0.026,0.158	0.176	NA
ENSG00000064961.18	HMG20B	chr19	+	3573691	3574586	3573691	3573800	3574382	3574586	88,85	176175	114127	144102	0.003599	0.2,0.195	0.284,0.384	-0.136	NA
ENSG00000065357.19	DGKA	chr12	+	55938914	55939305	55938914	55938989	55939185	55939305	3,3	29,46	4,5	10,2	0.0232208	0.049,0.032	0.167,0.556	-0.321	NA
ENSG00000072778.19	ACADVL	chr17	+	7220765	7221058	7220765	7220830	7220923	7221058	115,98	733770	127204	395380	4.15162e-11	0.073,0.06	0.138,0.212	-0.108	NA
ENSG00000072778.19	ACADVL	chr17	+	7220121	7220676	7220121	7220197	7220603	7220676	50,50	16,16	41,92	7,8	0.0321254	0.61,0.61	0.745,0.852	-0.189	NA
ENSG00000075415.12	SLC25A3	chr12	+	98593624	98594135	98593624	98593740	98593974	98594135	61,69	59,61	41,51	72,83	0.036166	0.341,0.361	0.222,0.235	0.122	NA
ENSG00000076258.9	FMO4	chr1	+	171341412	171342084	171341412	171341493	171341944	171342084	45,59	3,10	12,5	0,0	0.00489591	0.882,0.747	1.0,1.0	-0.185	NA
ENSG00000087266.15	SH3BP2	chr4	+	2831922	2832412	2831922	2831978	2832330	2832412	25,19	88,91	64146	96,68	0.000318208	0.124,0.095	0.25,0.518	-0.275	NA
ENSG00000087274.16	ADD1	chr4	+	2908514	2909431	2908514	2908604	2909338	2909431	26,36	3,5	35,48	0,0	0.00117992	0.813,0.783	1.0,1.0	-0.202	NA
ENSG00000088038.17	CNOT3	chr19	+	54143659	54144134	54143659	54143749	54144005	54144134	19,30	164182	37157	220156	0.0158361	0.055,0.076	0.078,0.335	-0.141	NA
ENSG00000090061.17	CCNK	chr14	+	99502718	99503644	99502718	99502984	99503610	99503644	5,16	51102	31,61	99,84	0.000321926	0.047,0.073	0.135,0.266	-0.141	NA
ENSG00000090061.17	CCNK	chr14	+	99500765	99502376	99500765	99500871	99502206	99502376	27,41	1,1	39104	3,16	0.0251196	0.931,0.953	0.867,0.765	0.126	NA
ENSG00000094631.18	HDAC6	chrX	+	48805630	48806464	48805630	48805671	48806367	48806464	14,20	47,44	34,58	46,44	0.00843369	0.13,0.185	0.27,0.397	-0.176	0.136
ENSG00000099331.13	MYO9B	chr19	+	17202841	17203258	17202841	17202883	17203146	17203258	14,16	36,49	19,35	19,11	0.00445253	0.163,0.14	0.333,0.614	-0.322	NA
ENSG00000099624.7	ATP5D	chr19	+	1244314	1244825	1244314	1244440	1244736	1244825	197279	30,40	220210	50,63	0.0271593	0.767,0.777	0.688,0.625	0.116	NA
ENSG00000099797.11	TECR	chr19	+	14563657	14563903	14563657	14563702	14563770	14563903	27,10	3,3	15,26	1,0	0.0232208	0.826,0.638	0.888,1.0	-0.212	NA
ENSG00000100003.17	SEC14L2	chr22	+	30415758	30416087	30415758	30415865	30415947	30416087	0,3	13,11	13,2	15,3	0.00955585	0.0,0.12	0.302,0.25	-0.216	NA
ENSG00000100151.15	PICK1	chr22	+	38073772	38074451	38073772	38073823	38074306	38074451	22,9	22,17	36,43	19,14	0.0209557	0.333,0.209	0.486,0.606	-0.275	0.332
ENSG00000100359.20	SGSM3	chr22	+	40408932	40409372	40408932	40409018	40409249	40409372	88,97	4,4	58,67	14,9	0.0061394	0.917,0.924	0.674,0.788	0.19	0.322
ENSG00000100650.15	SRSF5	chr14	+	69768797	69770540	69768797	69768896	69769181	69770540	332340	588518	537841	269113	5.55028e-06	0.22,0.247	0.5,0.788	-0.411	0.316
ENSG00000101158.12	NELFCD	chr20	+	58988913	58989640	58988913	58989021	58989487	58989640	205255	679604	370759	720470	0.01639	0.131,0.174	0.204,0.447	-0.173	NA
ENSG00000101199.12	ARFGAP1	chr20	+	63287563	63289788	63287563	63289496	63289677	63289788	193230	7,8	207164	21,34	0.000154333	0.932,0.935	0.831,0.707	0.165	NA
ENSG00000102119.10	EMD	chrX	+	154379941	154380367	154379941	154380019	154380233	154380367	265370	608848	443874	697674	0.00333642	0.179,0.179	0.241,0.393	-0.138	NA
ENSG00000102125.15	TAZ	chrX	+	154420031	154420264	154420031	154420094	154420211	154420264	27,27	35,39	16,18	64,51	0.0159432	0.278,0.257	0.111,0.15	0.137	NA
ENSG00000103496.14	STX4	chr16	+	31034225	31034877	31034225	31034325	31034461	31034877	97112	89143	138226	104,70	0.0427292	0.353,0.281	0.399,0.617	-0.191	NA
ENSG00000103507.13	BCKDK	chr16	+	31109672	31110124	31109672	31109783	31110076	31110124	30,37	480583	45113	298199	9.61913e-09	0.03,0.031	0.07,0.221	-0.115	-0.282
ENSG00000103507.13	BCKDK	chr16	+	31110400	31111219	31110400	31110499	31111090	31111219	56,66	5,6	81101	19,42	0.00382401	0.848,0.846	0.681,0.546	0.233	-0.139
ENSG00000103653.16	CSK	chr15	+	74801694	74802083	74801694	74801890	74801996	74802083	4,3	21,38	8,17	12,13	0.000233417	0.087,0.038	0.25,0.395	-0.26	NA
ENSG00000103653.16	CSK	chr15	+	74800411	74800746	74800411	74800505	74800680	74800746	10,8	83,95	15,9	31,23	0.00149202	0.057,0.04	0.195,0.164	-0.131	NA
ENSG00000107937.18	GTPBP4	chr10	+	996105	997308	996105	996242	997207	997308	9,19	47,68	16,64	50,62	0.0492492	0.087,0.123	0.138,0.34	-0.134	0.199
ENSG00000108465.14	CDK5RAP3	chr17	+	47975513	47976013	47975513	47975653	47975868	47976013	12431181	278291	9401397	150126	0.000170364	0.691,0.67	0.758,0.847	-0.122	0.233
ENSG00000108465.14	CDK5RAP3	chr17	+	47973518	47974031	47973518	47973650	47973930	47974031	285253	685779	246382	422463	2.71325e-05	0.172,0.14	0.226,0.292	-0.103	NA
ENSG00000108963.17	DPH1	chr17	+	2041767	2043424	2041767	2041875	2042604	2043424	7,12	28,52	14,23	26,10	0.0237934	0.111,0.103	0.212,0.535	-0.267	NA
ENSG00000111325.16	OGFOD2	chr12	+	122975810	122976767	122975810	122975867	122976653	122976767	27,38	36,27	49,42	19,14	0.019449	0.273,0.413	0.563,0.6	-0.238	0.292
ENSG00000111674.8	ENO2	chr12	+	6916670	6917107	6916670	6916729	6917037	6917107	9191108	10161566	19683752	20001977	0.0492492	0.311,0.261	0.33,0.487	-0.122	NA
ENSG00000111752.10	PHC1	chr12	+	8922632	8922788	8922632	8922656	8922732	8922788	20,40	0,3	14,17	4,4	0.0497692	1.0,0.87	0.636,0.68	0.277	NA
ENSG00000112146.16	FBXO9	chr6	+	53092733	53093561	53092733	53092824	53093465	53093561	37,33	84,60	46,50	15,22	1.20548e-08	0.18,0.216	0.605,0.532	-0.37	NA
ENSG00000112739.16	PRPF4B	chr6	+	4056320	4057187	4056320	4056435	4057035	4057187	34,43	52,42	57117	39,39	0.0190234	0.246,0.339	0.422,0.6	-0.219	NA
ENSG00000115268.9	RPS15	chr19	+	1438806	1440253	1438806	1438892	1439960	1440253	6,18	4,2	9,29	1,0	0.0121923	0.429,0.818	0.818,1.0	-0.286	NA
ENSG00000117266.15	CDK18	chr1	+	205529520	205530349	205529520	205529563	205530258	205530349	17,26	102137	37,56	89,54	0.000249984	0.077,0.087	0.172,0.341	-0.175	NA
ENSG00000117335.18	CD46	chr1	+	207767012	207770362	207767012	207767195	207770320	207770362	99123	170202	123,68	339312	0.000154333	0.226,0.233	0.154,0.098	0.104	NA
ENSG00000123154.11	WDR83	chr19	+	12669754	12670080	12669754	12669893	12669976	12670080	19,12	22,14	4,3	31,15	0.000991026	0.302,0.3	0.061,0.091	0.225	NA
ENSG00000124177.14	CHD6	chr20	-	41496808	41498226	41496808	41497501	41498167	41498226	2,7	141186	22,47	139114	1.98202e-10	0.007,0.018	0.073,0.171	-0.11	NA
ENSG00000124784.8	RIOK1	chr6	+	7402602	7402897	7402602	7402715	7402816	7402897	9,4	54,60	26,20	52,48	0.000467027	0.077,0.032	0.2,0.172	-0.132	NA
ENSG00000129197.14	RPAIN	chr17	+	5425970	5426299	5425970	5426082	5426235	5426299	61,73	105113	56,35	49,25	0.0177892	0.225,0.244	0.364,0.412	-0.154	NA
ENSG00000129657.14	SEC14L1	chr17	+	77088748	77089271	77088748	77088949	77089152	77089271	10,13	9,17	11,14	1,3	0.00468195	0.357,0.277	0.846,0.7	-0.456	NA
ENSG00000130304.16	SLC27A1	chr19	+	17486562	17487335	17486562	17486957	17487173	17487335	20,21	37,65	30,24	31,28	0.0392013	0.213,0.139	0.326,0.3	-0.137	0.246
ENSG00000130714.15	POMT1	chr9	+	131509902	131510415	131509902	131509996	131510259	131510415	138128	57,44	141171	27,30	0.00713081	0.548,0.593	0.723,0.74	-0.161	NA
ENSG00000130813.17	C19orf66	chr19	+	10091249	10091630	10091249	10091353	10091475	10091630	29,21	11,16	14,11	1,2	0.0437816	0.569,0.396	0.875,0.733	-0.322	NA
ENSG00000132300.18	PTCD3	chr2	+	86133177	86133436	86133177	86133256	86133345	86133436	8,27	127133	27,48	129,55	0.00617887	0.031,0.092	0.095,0.304	-0.138	NA
ENSG00000135451.12	TROAP	chr12	+	49330144	49331407	49330144	49330943	49331213	49331407	61,60	35,53	47,22	74,45	0.00581609	0.466,0.361	0.241,0.196	0.195	NA
ENSG00000135476.11	ESPL1	chr12	+	53288537	53289303	53288537	53288699	53289089	53289303	9,10	47,50	31,22	65,26	0.00666453	0.087,0.091	0.193,0.297	-0.156	NA
ENSG00000136279.18	DBNL	chr7	+	44057781	44058280	44057781	44057859	44058128	44058280	12,18	229172	17,26	116,46	0.000710535	0.026,0.05	0.068,0.22	-0.106	NA
ENSG00000136279.18	DBNL	chr7	+	44058431	44058983	44058431	44058480	44058901	44058983	32,17	98104	28,33	55,25	0.00489591	0.14,0.076	0.203,0.398	-0.192	NA
ENSG00000139372.14	TDG	chr12	+	103982798	103983389	103982798	103982934	103983294	103983389	5,19	0,0	10,24	1,6	0.00122307	1.0,1.0	0.833,0.667	0.25	0.345
ENSG00000140398.13	NEIL1	chr15	+	75354249	75354492	75354249	75354277	75354430	75354492	22,23	2,5	18,10	0,0	0.00251425	0.846,0.697	1.0,1.0	-0.229	NA
ENSG00000140416.19	TPM1	chr15	+	63061197	63062277	63061197	63061273	63062214	63062277	139138	561499	183158	288143	1.75855e-08	0.11,0.121	0.241,0.356	-0.183	NA
ENSG00000140525.17	FANCI	chr15	+	89281764	89283250	89281764	89281835	89283135	89283250	22,33	33,47	58,43	45,24	0.0300264	0.25,0.26	0.392,0.473	-0.177	NA
ENSG00000140553.16	UNC45A	chr15	+	90948141	90948794	90948141	90948283	90948653	90948794	20,35	89124	46,61	50,44	6.68144e-08	0.101,0.124	0.315,0.409	-0.249	NA
ENSG00000140553.16	UNC45A	chr15	+	90935945	90936460	90935945	90935982	90936284	90936460	16,15	98,85	26,45	39,34	1.41694e-06	0.075,0.081	0.25,0.398	-0.246	NA
ENSG00000140553.16	UNC45A	chr15	+	90949653	90950267	90949653	90949720	90950153	90950267	22,31	128142	28,38	77,64	0.00489591	0.079,0.098	0.154,0.229	-0.103	NA
ENSG00000140983.13	RHOT2	chr16	+	672253	672825	672253	672566	672702	672825	28,27	91,64	35,63	44,54	0.000564032	0.133,0.174	0.285,0.368	-0.173	NA
ENSG00000140983.13	RHOT2	chr16	+	668352	668699	668352	668411	668655	668699	30,36	6,6	24,42	1,1	0.0154418	0.714,0.75	0.923,0.955	-0.207	NA
ENSG00000141002.18	TCF25	chr16	+	89904117	89905096	89904117	89904205	89904937	89905096	202211	410446	227206	305165	0.00168254	0.198,0.191	0.271,0.384	-0.133	0.11
ENSG00000141562.17	NARF	chr17	+	82483715	82484950	82483715	82483779	82484812	82484950	73,76	296408	134272	314280	1.35152e-05	0.11,0.085	0.176,0.327	-0.154	NA
ENSG00000141959.16	PFKL	chr21	+	44313912	44316339	44313912	44314021	44316243	44316339	122149	610748	139176	268242	1.57407e-12	0.091,0.091	0.206,0.267	-0.145	NA
ENSG00000141959.16	PFKL	chr21	+	44319350	44321875	44319350	44320147	44321728	44321875	50,51	326399	74120	206162	1.54511e-08	0.071,0.06	0.152,0.27	-0.146	NA
ENSG00000141959.16	PFKL	chr21	+	44319350	44320147	44319350	44319415	44320083	44320147	111,79	363408	99118	227162	5.73315e-05	0.133,0.088	0.179,0.267	-0.113	NA
ENSG00000142186.16	SCYL1	chr11	+	65538269	65538704	65538269	65538324	65538441	65538704	103112	226298	141218	241211	0.00691685	0.186,0.158	0.226,0.341	-0.112	NA
ENSG00000142765.17	SYTL1	chr1	+	27349971	27350485	27349971	27350132	27350388	27350485	165177	77,61	152188	37,34	0.0114852	0.517,0.592	0.673,0.734	-0.149	0.272
ENSG00000143847.15	PPFIA4	chr1	+	203075576	203078735	203075576	203075757	203076340	203078735	297295	5,14	231150	23,17	0.00107886	0.967,0.913	0.834,0.815	0.115	NA
ENSG00000145833.15	DDX46	chr5	+	134816429	134817714	134816429	134816603	134817495	134817714	1,5	19,12	7,5	2,5	0.0189807	0.026,0.172	0.636,0.333	-0.386	NA
ENSG00000146556.14	WASH2P	chr2	+	113595692	113596203	113595692	113595829	113596067	113596203	10,10	17,26	19,9	12,2	0.0251196	0.227,0.161	0.442,0.692	-0.373	NA
ENSG00000147140.15	NONO	chrX	+	71297835	71298508	71297835	71297938	71298468	71298508	155226	721840	252442	624607	6.32166e-06	0.097,0.119	0.168,0.267	-0.11	NA
ENSG00000148187.17	MRRF	chr9	+	122285168	122285946	122285168	122285287	122285779	122285946	36,47	29,36	57,64	20,6	0.00781053	0.383,0.395	0.588,0.842	-0.326	-0.193
ENSG00000148824.18	MTG1	chr10	+	133401528	133402245	133401528	133401590	133402148	133402245	13,16	43,34	15,17	13,8	0.00617887	0.131,0.19	0.366,0.515	-0.28	NA
ENSG00000149577.15	SIDT2	chr11	+	117189334	117190025	117189334	117189401	117189951	117190025	12,5	48,72	27,10	43,34	0.00885032	0.111,0.034	0.239,0.128	-0.111	NA
ENSG00000151498.11	ACAD8	chr11	+	134259607	134261179	134259607	134259745	134261043	134261179	8,9	17,15	12,10	5,5	0.0257986	0.19,0.231	0.545,0.5	-0.312	NA
ENSG00000157978.11	LDLRAP1	chr1	+	25563660	25565207	25563660	25563791	25565172	25565207	4,2	19,18	14,4	14,8	0.0199604	0.095,0.053	0.333,0.2	-0.193	NA
ENSG00000158864.12	NDUFS2	chr1	+	161213863	161214395	161213863	161213921	161214155	161214395	143231	171176	264388	82,37	2.14998e-06	0.295,0.396	0.617,0.84	-0.383	0.315
ENSG00000160633.12	SAFB	chr19	+	5667352	5667886	5667352	5667450	5667819	5667886	12,31	115168	67172	180103	0.00041386	0.05,0.084	0.157,0.455	-0.239	NA
ENSG00000160972.9	PPP1R16A	chr8	+	144500095	144500391	144500095	144500199	144500266	144500391	88100	84,72	119175	36,22	8.57462e-06	0.358,0.425	0.637,0.809	-0.332	0.302
ENSG00000160972.9	PPP1R16A	chr8	+	144500266	144500612	144500266	144500391	144500486	144500612	40,40	102113	45,61	72,31	0.0254738	0.164,0.15	0.238,0.496	-0.21	NA
ENSG00000161204.11	ABCF3	chr3	+	184187663	184187983	184187663	184187761	184187860	184187983	23,27	110145	35,55	77,51	0.000246636	0.095,0.085	0.185,0.35	-0.177	NA
ENSG00000161960.14	EIF4A1	chr17	+	7574259	7574678	7574259	7574308	7574545	7574678	55,64	555562	84368	389469	2.06812e-06	0.047,0.054	0.097,0.282	-0.139	NA
ENSG00000161996.17	WDR90	chr16	+	653745	655147	653745	653803	655028	655147	21,12	9,8	33,39	2,6	0.0146707	0.538,0.429	0.892,0.765	-0.345	0.282
ENSG00000164068.15	RNF123	chr3	+	49705533	49706065	49705533	49705679	49705981	49706065	6,0	20,28	17,10	9,13	0.000318208	0.13,0.0	0.486,0.278	-0.317	NA
ENSG00000165359.14	DDX26B	chrX	+	135569336	135573033	135569336	135569431	135572814	135573033	28,25	38,47	11,5	43,41	0.00284761	0.269,0.21	0.113,0.057	0.154	NA
ENSG00000165792.17	METTL17	chr14	+	20993117	20994063	20993117	20993191	20993968	20994063	117103	95135	109214	45,30	0.000283876	0.381,0.276	0.548,0.781	-0.336	NA
ENSG00000165792.17	METTL17	chr14	+	20995900	20996292	20995900	20995951	20996208	20996292	82101	129148	96231	82,58	0.0159432	0.241,0.254	0.369,0.666	-0.27	NA
ENSG00000166140.17	ZFYVE19	chr15	+	40813337	40813811	40813337	40813417	40813712	40813811	36,36	68,84	46,69	64,63	0.0427292	0.209,0.176	0.264,0.354	-0.116	NA
ENSG00000166333.13	ILK	chr11	+	6608693	6609156	6608693	6608967	6609070	6609156	51,60	209257	103179	109,58	3.35008e-06	0.109,0.105	0.321,0.607	-0.357	NA
ENSG00000166333.13	ILK	chr11	+	6608693	6608967	6608693	6608790	6608883	6608967	30,27	217244	36,53	133,95	2.91413e-05	0.065,0.052	0.119,0.218	-0.11	NA
ENSG00000166913.12	YWHAB	chr20	+	44904967	44906096	44904967	44905131	44906000	44906096	49,73	198179	49,52	102,49	0.0246187	0.11,0.169	0.194,0.347	-0.131	NA
ENSG00000167103.11	PIP5KL1	chr9	-	127927152	127927331	127927152	127927208	127927296	127927331	0,1	7,18	3,4	6,8	0.0102434	0.0,0.027	0.2,0.2	-0.186	NA
ENSG00000167964.12	RAB26	chr16	+	2152819	2153222	2152819	2152885	2152988	2153222	32,41	130205	55127	146195	0.000405147	0.11,0.091	0.159,0.246	-0.102	NA
ENSG00000167967.15	E4F1	chr16	+	2229569	2232364	2229569	2229675	2232170	2232364	17,14	30,35	27,55	18,17	0.000462881	0.221,0.167	0.429,0.618	-0.329	NA
ENSG00000168071.21	CCDC88B	chr11	+	64351159	64351616	64351159	64351255	64351475	64351616	5,7	1,4	12,23	0,1	0.00406279	0.714,0.467	1.0,0.92	-0.369	NA
ENSG00000168137.15	SETD5	chr3	+	9474448	9475156	9474448	9474582	9475067	9475156	78109	272216	127165	239165	0.016689	0.125,0.201	0.21,0.333	-0.109	NA
ENSG00000168488.18	ATXN2L	chr16	+	28835932	28837237	28835932	28836122	28836727	28837237	232380	42,65	415430	33,29	0.000246636	0.734,0.745	0.863,0.881	-0.132	NA
ENSG00000168906.12	MAT2A	chr2	+	85542154	85542747	85542154	85542373	85542564	85542747	71,76	528546	110210	384286	5.20392e-07	0.063,0.065	0.125,0.269	-0.133	NA
ENSG00000168970.21	JMJD7-PLA2G4B	chr15	+	41834739	41835223	41834739	41834893	41834969	41835223	25,11	8,5	9,2	6,16	0.0401528	0.61,0.524	0.429,0.059	0.323	NA
ENSG00000169598.15	DFFB	chr1	+	3883506	3885429	3883506	3883800	3885037	3885429	27,17	2,0	8,13	5,3	0.0111597	0.871,1.0	0.444,0.684	0.371	NA
ENSG00000170037.13	CNTROB	chr17	+	7948486	7949137	7948486	7948619	7949084	7949137	85113	44,33	126218	28,12	0.00884281	0.491,0.631	0.692,0.901	-0.236	NA
ENSG00000170037.13	CNTROB	chr17	+	7944122	7944638	7944122	7944248	7944475	7944638	48,34	70,84	55,49	39,54	0.0263595	0.255,0.168	0.414,0.312	-0.151	NA
ENSG00000171109.18	MFN1	chr3	+	179378340	179378814	179378340	179378443	179378584	179378814	16,18	64,65	21,19	25,11	0.00117992	0.111,0.122	0.296,0.463	-0.263	NA
ENSG00000172732.11	MUS81	chr11	+	65864719	65865145	65864719	65864815	65865016	65865145	45,45	50,60	36,34	20,18	0.0240867	0.31,0.273	0.474,0.486	-0.189	NA
ENSG00000172830.12	SSH3	chr11	+	67306837	67307113	67306837	67306962	67307041	67307113	72,78	104117	84,52	44,43	0.00489591	0.257,0.25	0.488,0.377	-0.179	NA
ENSG00000173020.10	ADRBK1	chr11	+	67281821	67282542	67281821	67281952	67282270	67282542	40,59	255312	109181	313310	1.1397e-06	0.073,0.086	0.148,0.226	-0.108	NA
ENSG00000175166.16	PSMD2	chr3	+	184303319	184303749	184303319	184303466	184303642	184303749	25,22	123146	45,41	102,80	0.000305285	0.092,0.07	0.181,0.204	-0.112	NA
ENSG00000177106.14	EPS8L2	chr11	+	709552	710486	709552	709608	710421	710486	104,73	233243	95134	176,97	0.0177892	0.182,0.131	0.213,0.409	-0.154	NA
ENSG00000177685.16	CRACR2B	chr11	+	830865	831295	830865	831032	831223	831295	13,8	6,5	4,9	0,0	7.76728e-05	0.52,0.444	1.0,1.0	-0.518	NA
ENSG00000177943.13	MAMDC4	chr9	+	136857978	136858546	136857978	136858097	136858399	136858546	14,8	5,2	6,8	0,1	0.0192846	0.583,0.667	1.0,0.8	-0.275	NA
ENSG00000178252.17	WDR6	chr3	+	49011634	49014293	49011634	49014116	49014209	49014293	144150	65,82	99,64	76,84	0.0157039	0.526,0.478	0.394,0.276	0.167	NA
ENSG00000178719.16	GRINA	chr8	+	143991691	143992373	143991691	143991804	143992244	143992373	86107	38,26	129203	18,6	0.000291408	0.531,0.673	0.782,0.944	-0.261	NA
ENSG00000180104.15	EXOC3	chr5	+	464289	465272	464289	464412	465110	465272	26,45	130143	37,47	76,63	0.00284761	0.091,0.136	0.196,0.272	-0.121	NA
ENSG00000182004.12	SNRPE	chr1	+	203861602	203862222	203861602	203861743	203862181	203862222	21,36	7,14	11,30	24,24	0.023067	0.6,0.563	0.186,0.385	0.296	NA
ENSG00000183401.11	CCDC159	chr19	+	11353450	11353874	11353450	11353572	11353791	11353874	33,31	10,13	8,15	1,0	0.00196316	0.623,0.544	0.8,1.0	-0.317	NA
ENSG00000183963.18	SMTN	chr22	+	31099061	31099896	31099061	31099179	31099744	31099896	9,13	32,60	9,42	22,30	0.0254738	0.123,0.098	0.17,0.412	-0.18	0.221
ENSG00000183963.18	SMTN	chr22	+	31096997	31097338	31096997	31097060	31097268	31097338	28,40	42,40	47106	23,14	0.00284761	0.25,0.333	0.505,0.791	-0.357	0.426
ENSG00000186815.12	TPCN1	chr12	+	113288162	113288847	113288162	113288234	113288757	113288847	64,99	75,81	119105	37,6	0.000100411	0.299,0.379	0.617,0.897	-0.418	NA
ENSG00000186815.12	TPCN1	chr12	+	113291873	113293073	113291873	113291958	113292933	113293073	70,97	126154	126,79	116,34	0.00668205	0.217,0.24	0.352,0.537	-0.216	NA
ENSG00000187134.12	AKR1C1	chr10	+	4966926	4968386	4966926	4967043	4968308	4968386	8,5	22,33	0,0	16,15	0.00298524	0.154,0.07	0.0,0.0	0.112	NA
ENSG00000187244.10	BCAM	chr19	+	44819581	44820822	44819581	44819726	44820704	44820822	45,70	166178	83128	152139	0.00162304	0.119,0.164	0.214,0.315	-0.123	NA
ENSG00000188542.9	DUSP28	chr2	+	240561329	240564014	240561329	240561519	240563673	240564014	17,10	18,23	3,4	19,24	0.0196857	0.321,0.179	0.073,0.077	0.175	NA
ENSG00000189337.15	KAZN	chr1	+	15060171	15063622	15060171	15060302	15063571	15063622	2,3	21,21	7,9	7,2	0.00105451	0.045,0.067	0.333,0.692	-0.456	NA
ENSG00000196975.15	ANXA4	chr2	+	69807905	69810673	69807905	69807996	69810593	69810673	16,48	133191	36,32	59,18	0.000169702	0.057,0.112	0.234,0.471	-0.268	NA
ENSG00000197530.12	MIB2	chr1	+	1628018	1628399	1628018	1628179	1628272	1628399	50,62	79,84	72,66	58,46	0.0159432	0.24,0.27	0.383,0.418	-0.145	NA
ENSG00000198089.14	SFI1	chr22	+	31604868	31606430	31604868	31604945	31606327	31606430	9,10	16,28	19,21	16,8	0.0159432	0.22,0.152	0.373,0.568	-0.284	NA
ENSG00000198720.12	ANKRD13B	chr17	+	29609085	29609421	29609085	29609275	29609354	29609421	4,8	22,19	0,0	8,8	0.00522743	0.083,0.174	0.0,0.0	0.129	NA
ENSG00000213593.9	TMX2	chr11	+	57738663	57739039	57738663	57738770	57738973	57739039	7,11	80,93	16,22	66,47	0.00398649	0.042,0.056	0.108,0.19	-0.1	NA
ENSG00000214517.8	PPME1	chr11	+	74250953	74251715	74250953	74251018	74251647	74251715	18,49	192253	94172	273204	2.14998e-06	0.045,0.088	0.147,0.297	-0.155	-0.308
ENSG00000250988.7	SNHG21	chr15	+	82756903	82757206	82756903	82756939	82757045	82757206	40,39	2,5	32,66	0,0	0.00450447	0.909,0.796	1.0,1.0	-0.147	NA
ENSG00000278558.4	TMEM191B	chr22	+	18529605	18530008	18529605	18529724	18529935	18530008	6,2	14,23	23,13	15,23	0.0225236	0.176,0.042	0.434,0.22	-0.218	NA

## Sheet: both_CE
GENCODE_GeneID	geneSymbol	chr	strand	exonStart_0base	exonEnd	upstreamEE	downstreamES	IJC_SAMPLE_1	SJC_SAMPLE_1	IJC_SAMPLE_2	SJC_SAMPLE_2	FDR	IncLevel1	IncLevel2	siMBNL2.IncLevelDifference	MCF-7.IncLevelDifference
ENSG00000000419.12	DPM1	chr20	-	50941104	50941209	50940955	50942030	74100	3,4	88,78	18,19	0.000263393	0.925,0.926	0.71,0.672	0.234	-0.279
ENSG00000003756.16	RBM5	chr3	+	50100531	50100605	50100051	50103082	50,62	14,12	28,16	18,16	0.0109428	0.644,0.724	0.441,0.336	0.295	-0.387
ENSG00000003756.16	RBM5	chr3	+	50104247	50104308	50103166	50105076	177172	10,11	84,25	38,54	7.05131e-07	0.908,0.897	0.551,0.205	0.525	-0.28
ENSG00000003989.16	SLC7A2	chr8	+	17502256	17502302	17497237	17543317	51,46	77100	10,9	73,64	4.28253e-05	0.293,0.223	0.079,0.081	0.178	-0.13
ENSG00000004864.13	SLC25A13	chr7	-	96189580	96189674	96189378	96191108	85,91	0,4	39,10	4,5	0.0202962	1.0,0.919	0.83,0.5	0.294	-0.176
ENSG00000005801.16	ZNF195	chr11	-	3373576	3373656	3371703	3379037	6,11	3,13	0,1	4,3	0.0096656	0.5,0.297	0.0,0.143	0.327	-0.345
ENSG00000006194.9	ZNF263	chr16	+	3288453	3288570	3284205	3289392	40,59	8,11	38,30	16,23	0.0374066	0.714,0.728	0.543,0.395	0.252	-0.309
ENSG00000008513.14	ST3GAL1	chr8	-	133499134	133499189	133476600	133545773	163158	8,5	243127	25,61	0.00288125	0.922,0.948	0.85,0.548	0.236	-0.107
ENSG00000011021.21	CLCN6	chr1	+	11828457	11828624	11828219	11829195	12,29	10,10	56,43	7,0	0.00463862	0.375,0.592	0.8,1.0	-0.417	0.574
ENSG00000011258.15	MBTD1	chr17	-	51202021	51202077	51201696	51202700	296262	12,24	154,27	30,42	0.00803565	0.934,0.863	0.748,0.271	0.389	-0.118
ENSG00000011566.14	MAP4K3	chr2	-	39307942	39308005	39299801	39309460	35,32	63,80	12,1	77,79	2.58825e-06	0.233,0.18	0.079,0.007	0.164	-0.139
ENSG00000012822.15	CALCOCO1	chr12	-	53724584	53724747	53723783	53725086	136140	7,10	48,38	13,21	6.69104e-05	0.907,0.875	0.649,0.475	0.329	-0.301
ENSG00000012822.15	CALCOCO1	chr12	-	53724644	53724747	53723783	53725086	300312	7,10	134,90	13,21	0.000111972	0.955,0.94	0.838,0.682	0.188	-0.138
ENSG00000028310.17	BRD9	chr5	-	868606	868804	865581	870472	21,16	59,49	22,33	10,11	1.22474e-07	0.151,0.14	0.524,0.6	-0.417	0.11
ENSG00000031003.10	FAM13B	chr5	-	137956476	137956542	137954376	137959615	11,5	13,26	1,0	12,13	0.0055481	0.312,0.093	0.043,0.0	0.181	-0.46
ENSG00000033867.16	SLC4A7	chr3	-	27409355	27409530	27404963	27411641	45,66	7,12	85,52	2,0	0.000163559	0.763,0.733	0.955,1.0	-0.23	0.182
ENSG00000035664.11	DAPK2	chr15	-	63924815	63924861	63912197	63925940	184235	20,18	115,80	29,19	0.00413159	0.852,0.891	0.713,0.725	0.152	-0.128
ENSG00000036054.12	TBC1D23	chr3	+	100311832	100311877	100310542	100316098	27,44	67102	21,10	111104	0.00108449	0.203,0.214	0.107,0.057	0.127	-0.169
ENSG00000039319.16	ZFYVE16	chr5	+	80448025	80448404	80445405	80449590	48,46	0,4	30,14	7,12	0.00269911	1.0,0.852	0.682,0.368	0.401	-0.183
ENSG00000042317.16	SPATA7	chr14	+	88393392	88393488	88391455	88396155	52,71	2,4	24,24	14,13	1.42775e-06	0.929,0.899	0.462,0.48	0.443	-0.424
ENSG00000046651.14	OFD1	chrX	+	13763744	13763855	13762444	13767126	323306	33,37	264233	67,80	2.66441e-05	0.83,0.805	0.663,0.593	0.19	-0.274
ENSG00000048028.11	USP28	chr11	-	113834248	113834335	113833557	113840597	51,61	0,6	101,45	14,24	0.0258599	1.0,0.836	0.783,0.484	0.284	-0.208
ENSG00000050748.17	MAPK9	chr5	-	180286974	180287067	180280608	180291847	9,11	16,21	2,0	12,15	0.0049415	0.22,0.208	0.077,0.0	0.175	-0.281
ENSG00000051825.14	MPHOSPH9	chr12	-	123163013	123163134	123161383	123163949	54,60	0,2	47,22	17,2	0.000930614	1.0,0.938	0.58,0.846	0.256	-0.167
ENSG00000058453.16	CROCC	chr1	+	16966407	16966571	16966119	16968202	62,60	8,2	31,23	1,0	0.0463147	0.795,0.938	0.939,1.0	-0.103	0.188
ENSG00000060237.16	WNK1	chr12	+	871264	871348	862270	878214	58,79	23,31	55,15	45,21	0.0236753	0.558,0.56	0.379,0.263	0.238	-0.238
ENSG00000062194.15	GPBP1	chr5	+	57237112	57237172	57236032	57246299	81,51	209243	25,0	260199	1.63988e-10	0.178,0.105	0.051,0.0	0.116	-0.114
ENSG00000064787.12	BCAS1	chr20	-	53957431	53957497	53953695	53966905	700651	110164	144,15	97,61	9.84533e-05	0.773,0.68	0.443,0.116	0.447	-0.346
ENSG00000064787.12	BCAS1	chr20	-	53957431	53957497	53953695	53975388	451418	84128	88,6	81,45	1.3122e-05	0.742,0.636	0.368,0.067	0.472	-0.262
ENSG00000065923.9	SLC9A7	chrX	-	46635588	46635648	46631649	46643235	130156	47,63	75,52	86,87	4.63259e-08	0.608,0.581	0.328,0.251	0.305	-0.363
ENSG00000066933.15	MYO9A	chr15	-	71902940	71903063	71901340	71903928	58,82	9,8	47,10	17,10	0.0193674	0.763,0.837	0.58,0.333	0.344	-0.131
ENSG00000068878.14	PSME4	chr2	-	53939955	53940000	53937540	53948420	65,73	1,3	59,17	9,5	0.00932103	0.976,0.939	0.805,0.682	0.214	-0.101
ENSG00000069869.15	NEDD4	chr15	-	55846968	55847034	55842163	55848371	43,26	0,0	29,9	2,3	0.0271463	1.0,1.0	0.886,0.616	0.249	-0.225
ENSG00000070081.15	NUCB2	chr11	+	17315385	17315475	17312120	17330126	206245	17,35	255216	52,72	0.00913712	0.858,0.778	0.71,0.6	0.163	-0.132
ENSG00000070214.15	SLC44A1	chr9	+	105299742	105299937	105299309	105309723	9,9	41,48	21,19	27,34	0.0103025	0.099,0.086	0.28,0.218	-0.157	0.124
ENSG00000070269.13	TMEM260	chr14	+	56603814	56603992	56585912	56605569	56,70	5,4	74,97	1,1	0.0375647	0.848,0.897	0.974,0.98	-0.104	0.144
ENSG00000071189.21	SNX13	chr7	-	17830009	17830047	17826091	17834051	83,72	4,1	63,49	8,12	0.00505748	0.933,0.98	0.841,0.732	0.17	-0.122
ENSG00000072071.16	ADGRL1	chr19	-	14152132	14152150	14151615	14152308	19,21	1,6	16,10	13,11	0.0146619	0.939,0.74	0.501,0.426	0.376	-0.273
ENSG00000072310.16	SREBF1	chr17	-	17823517	17823607	17820521	17836726	29,30	81,79	67134	97106	0.00330383	0.152,0.16	0.257,0.387	-0.166	-0.171
ENSG00000073060.15	SCARB1	chr12	-	124782682	124782811	124778586	124786356	236246	5,3	218201	17,25	2.05497e-05	0.959,0.976	0.865,0.801	0.135	-0.107
ENSG00000074054.17	CLASP1	chr2	-	121445448	121445496	121430177	121447336	80119	17,31	81,55	45,37	0.00318871	0.743,0.702	0.525,0.477	0.221	0.283
ENSG00000074964.16	ARHGEF10L	chr1	+	17634547	17634562	17632466	17634834	33,41	12,10	22,17	27,33	9.56075e-05	0.699,0.776	0.407,0.303	0.383	-0.236
ENSG00000076108.11	BAZ2A	chr12	-	56630775	56630865	56617532	56636181	59,47	41,50	46,48	84101	0.0106508	0.418,0.32	0.215,0.192	0.165	-0.389
ENSG00000077157.21	PPP1R12B	chr1	+	202430730	202430810	202428929	202431479	32,44	4,9	24,17	11,21	0.0182751	0.8,0.71	0.522,0.288	0.35	-0.24
ENSG00000081870.11	HSPB11	chr1	-	53928371	53928440	53923947	53930038	354411	4,3	382208	14,40	2.422e-06	0.979,0.986	0.935,0.732	0.149	-0.11
ENSG00000082898.16	XPO1	chr2	-	61501995	61502040	61499894	61522610	193196	19,37	139,74	50125	0.00655153	0.865,0.77	0.637,0.272	0.363	-0.26
ENSG00000085982.13	USP40	chr2	-	233525477	233525562	233524562	233527406	83,76	2,3	34,8	3,7	0.0492926	0.954,0.927	0.85,0.364	0.334	-0.316
ENSG00000088340.15	FER1L4	chr20	-	35578835	35578967	35576828	35579055	230265	53,60	208237	26,15	0.00196303	0.685,0.688	0.8,0.888	-0.158	-0.195
ENSG00000088448.14	ANKRD10	chr13	-	110900529	110900661	110893263	110906032	42,31	37,47	12,13	39,32	0.0490428	0.362,0.248	0.133,0.169	0.154	-0.3
ENSG00000090006.17	LTBP4	chr19	+	40622949	40623021	40622667	40623603	180215	41,68	115120	87,63	0.00132685	0.693,0.619	0.404,0.495	0.206	-0.365
ENSG00000090060.17	PAPOLA	chr14	+	96560648	96560711	96556413	96564954	79,61	79,76	26,10	57,32	0.0183325	0.354,0.305	0.2,0.146	0.157	-0.158
ENSG00000090989.17	EXOC1	chr4	+	55888887	55888932	55883928	55890222	91110	59,58	30,4	62,84	3.99133e-08	0.493,0.544	0.234,0.029	0.387	-0.238
ENSG00000091129.19	NRCAM	chr7	-	108177989	108178112	108160492	108180222	115121	10,11	79,37	37,25	1.22159e-07	0.852,0.846	0.516,0.425	0.378	-0.191
ENSG00000092096.14	SLC22A17	chr14	-	23347890	23347996	23347731	23348160	22,27	6,3	33,34	1,1	0.0433504	0.647,0.818	0.943,0.944	-0.211	0.313
ENSG00000092208.16	GEMIN2	chr14	+	39124991	39125036	39122543	39128279	61,55	9,8	42,38	17,32	0.00435059	0.81,0.812	0.609,0.428	0.293	0.12
ENSG00000094975.13	SUCO	chr1	+	172577538	172577559	172575623	172577763	86132	28,16	154,58	7,4	0.00570059	0.708,0.867	0.946,0.92	-0.146	0.195
ENSG00000095787.21	WAC	chr10	+	28595732	28596041	28590832	28608185	375507	65,82	405331	45,21	0.0160924	0.743,0.756	0.818,0.887	-0.103	0.264
ENSG00000099783.11	HNRNPM	chr19	+	8462528	8462581	8455574	8463496	493422	9,7	207,73	8,23	0.00109154	0.97,0.973	0.939,0.652	0.176	-0.1
ENSG00000100266.18	PACSIN2	chr22	-	42876887	42877010	42876333	42879047	202241	30,67	163108	86125	0.000489849	0.771,0.643	0.487,0.302	0.313	-0.257
ENSG00000100281.13	HMGXB4	chr22	+	35263981	35264096	35263874	35264647	38,57	21,12	56,70	5,4	0.00901146	0.475,0.704	0.848,0.897	-0.283	0.352
ENSG00000100523.14	DDHD1	chr14	-	53051843	53051927	53046949	53054437	18,15	34,42	1,0	25,13	0.000117968	0.209,0.152	0.02,0.0	0.17	-0.276
ENSG00000100731.15	PCNX	chr14	+	70988566	70988699	70978648	70995740	19,31	0,1	21,7	1,7	0.0141244	1.0,0.939	0.913,0.333	0.347	-0.318
ENSG00000100731.15	PCNX	chr14	+	70995740	70995843	70978648	71009633	0,1	9,19	1,7	5,7	0.00795164	0.0,0.026	0.091,0.333	-0.199	0.306
ENSG00000101150.17	TPD52L2	chr20	+	63875815	63875875	63873816	63882718	655848	143187	484218	336381	1.17646e-07	0.719,0.717	0.446,0.243	0.373	-0.204
ENSG00000101187.15	SLCO4A1	chr20	+	62668011	62668184	62667910	62668476	152226	24,28	432348	21,8	3.83781e-05	0.76,0.801	0.911,0.956	-0.153	0.221
ENSG00000101187.15	SLCO4A1	chr20	+	62668157	62668184	62667910	62668476	28,49	24,28	74,54	21,8	0.0103402	0.464,0.565	0.724,0.834	-0.264	0.368
ENSG00000101187.15	SLCO4A1	chr20	+	62668154	62668184	62667910	62668476	28,50	24,28	76,58	21,8	0.00858547	0.457,0.563	0.723,0.839	-0.271	0.388
ENSG00000101333.16	PLCB4	chr20	+	9476716	9476753	9473365	9478920	17,11	1,1	2,7	5,6	0.00118181	0.92,0.881	0.213,0.441	0.574	-0.466
ENSG00000102908.20	NFAT5	chr16	+	69646516	69646578	69626528	69647027	15,19	9,17	9,6	23,23	0.0114734	0.479,0.381	0.177,0.126	0.278	-0.361
ENSG00000102984.14	ZNF821	chr16	-	71867892	71868037	71865048	71879906	57,67	6,11	24,26	8,15	0.0390889	0.826,0.753	0.6,0.464	0.257	-0.318
ENSG00000103121.8	CMC2	chr16	-	80981805	80981877	80980879	80997313	148180	6,9	254175	33,61	0.000438643	0.927,0.911	0.798,0.596	0.222	-0.136
ENSG00000103121.8	CMC2	chr16	-	80980769	80980879	80976179	80997313	162243	14,25	361537	64104	0.0228791	0.853,0.829	0.738,0.721	0.111	-0.13
ENSG00000103121.8	CMC2	chr16	-	80981805	80981877	80976179	80997313	266293	14,25	333207	64104	0.000157312	0.907,0.858	0.728,0.506	0.266	-0.115
ENSG00000103145.10	HCFC1R1	chr16	-	3023473	3023530	3023361	3023846	170228	109121	158155	187210	3.45684e-05	0.472,0.519	0.326,0.297	0.184	-0.266
ENSG00000103540.16	CCP110	chr16	+	19547954	19548014	19546474	19551195	45,31	0,0	33,11	4,3	0.00204275	1.0,1.0	0.822,0.672	0.253	-0.175
ENSG00000104731.13	KLHDC4	chr16	-	87765065	87765340	87762040	87765791	2,4	28,47	9,9	29,15	0.0129243	0.034,0.041	0.134,0.231	-0.145	0.138
ENSG00000105699.16	LSR	chr19	+	35261924	35261981	35259064	35262545	101104	70,94	50,38	91,67	0.00173642	0.452,0.388	0.239,0.245	0.178	-0.194
ENSG00000105865.10	DUS4L	chr7	+	107573703	107573883	107571266	107575187	98119	9,9	51,62	1,0	0.00325617	0.845,0.869	0.962,1.0	-0.124	-0.235
ENSG00000106086.18	PLEKHA8	chr7	+	30050433	30050474	30049382	30052708	56,51	3,7	32,14	19,34	4.12885e-05	0.924,0.826	0.523,0.212	0.508	-0.342
ENSG00000106351.12	AGFG2	chr7	+	100556593	100556626	100555735	100562258	5,2	13,14	0,0	17,7	0.0106955	0.212,0.091	0.0,0.0	0.151	-0.11
ENSG00000107521.18	HPS1	chr10	-	98431130	98431291	98430670	98433939	43,43	5,3	30,12	0,0	0.0105086	0.811,0.878	1.0,1.0	-0.155	0.119
ENSG00000107758.15	PPP3CB	chr10	-	73439871	73439901	73438420	73444724	102,88	13,20	30,20	19,32	0.000251762	0.85,0.76	0.532,0.311	0.383	-0.483
ENSG00000107897.18	ACBD5	chr10	-	27223206	27223239	27219857	27223337	45,50	68112	31,7	139119	2.25793e-05	0.317,0.238	0.135,0.04	0.19	-0.211
ENSG00000108799.12	EZH1	chr17	-	42724304	42724424	42722915	42727634	120144	18,16	107106	24,67	0.0377786	0.769,0.818	0.69,0.442	0.228	-0.194
ENSG00000110066.14	SUV420H1	chr11	-	68180131	68180200	68175183	68185780	443489	19,30	262109	36,60	0.0013056	0.924,0.895	0.792,0.488	0.269	-0.143
ENSG00000110497.14	AMBRA1	chr11	-	46512726	46512813	46508370	46541944	23,15	12,24	9,9	27,41	0.0305554	0.489,0.238	0.143,0.099	0.242	-0.217
ENSG00000110721.11	CHKA	chr11	-	68081403	68081457	68074830	68097018	33,44	0,1	50,22	3,4	0.0320993	1.0,0.963	0.907,0.763	0.147	0.147
ENSG00000111711.9	GOLT1B	chr12	+	21508382	21508561	21506976	21512294	79,80	0,5	80,75	4,38	0.0450668	1.0,0.889	0.909,0.497	0.241	-0.147
ENSG00000111877.17	MCM9	chr6	-	118932606	118932740	118931738	118934890	27,37	2,2	18,13	5,7	0.0229419	0.871,0.902	0.643,0.481	0.325	-0.587
ENSG00000112511.17	PHF1	chr6	+	33413735	33413831	33413557	33414040	88149	11,14	100118	27,46	0.000960024	0.8,0.842	0.649,0.562	0.215	-0.205
ENSG00000112640.14	PPP2R5D	chr6	+	43008692	43008746	43008475	43009056	219296	23,36	174,98	63,86	2.60315e-05	0.848,0.828	0.618,0.4	0.329	-0.162
ENSG00000114268.11	PFKFB4	chr3	-	48539253	48539310	48538619	48539696	314427	41,52	437329	106103	0.000237999	0.814,0.825	0.702,0.646	0.145	-0.278
ENSG00000114439.18	BBX	chr3	+	107789786	107789876	107778519	107791239	109165	22,48	99,31	55,38	0.00473848	0.712,0.632	0.474,0.29	0.29	-0.304
ENSG00000114735.9	HEMK1	chr3	+	50578820	50578926	50577573	50579843	43,51	11,12	28,14	19,11	0.0314034	0.662,0.68	0.424,0.389	0.265	-0.381
ENSG00000115282.19	TTC31	chr2	+	74490655	74490739	74490473	74491127	60,83	12,23	48,23	25,17	0.0439191	0.714,0.643	0.49,0.404	0.231	-0.357
ENSG00000115307.16	AUP1	chr2	-	74528416	74528489	74528006	74528750	53103	4,3	60,49	8,10	0.0471486	0.871,0.946	0.793,0.714	0.155	-0.157
ENSG00000115421.12	PAPOLG	chr2	+	60794709	60794775	60794191	60794963	24,38	1,1	27,10	3,16	0.0146472	0.928,0.953	0.828,0.251	0.401	-0.124
ENSG00000115649.15	CNPPD1	chr2	-	219174145	219174207	219173467	219174777	248296	6,3	187122	10,22	0.000176222	0.958,0.982	0.912,0.754	0.137	-0.127
ENSG00000115966.16	ATF2	chr2	-	175121443	175121540	175118369	175130137	171183	22,40	173146	63,56	0.0113502	0.795,0.696	0.579,0.566	0.173	-0.135
ENSG00000116212.14	LRRC42	chr1	+	53947787	53947821	53946549	53951985	38,43	22,36	28,14	59,46	0.000397838	0.545,0.453	0.248,0.174	0.288	-0.291
ENSG00000116791.13	CRYZ	chr1	-	74707102	74707204	74706994	74710097	116105	4,9	87,55	11,21	0.026051	0.935,0.854	0.798,0.567	0.212	-0.415
ENSG00000116918.13	TSNAX	chr1	+	231563464	231563629	231561255	231564527	23,17	36,48	27,57	25,31	0.00864982	0.242,0.15	0.351,0.479	-0.219	0.104
ENSG00000117280.12	RAB29	chr1	-	205772495	205772567	205771653	205774832	119133	1,0	105,62	5,12	8.74429e-05	0.984,1.0	0.915,0.726	0.171	-0.139
ENSG00000117305.14	HMGCL	chr1	-	23814189	23814338	23808323	23816674	227272	25,44	224161	76105	8.43981e-05	0.819,0.756	0.596,0.434	0.272	-0.281
ENSG00000117335.18	CD46	chr1	+	207767778	207767823	207767195	207770320	322362	170202	297207	339312	4.04084e-08	0.544,0.53	0.356,0.295	0.212	-0.179
ENSG00000117448.13	AKR1A1	chr1	+	45568484	45568684	45568177	45568926	246296	36,32	279241	10,6	2.95616e-05	0.774,0.822	0.933,0.953	-0.145	-0.138
ENSG00000117620.12	SLC35A3	chr1	+	99974970	99975069	99970644	99993536	23,22	11,14	15,5	27,21	0.00345903	0.511,0.44	0.217,0.106	0.314	-0.527
ENSG00000117868.15	ESYT2	chr7	-	158752780	158752843	158749723	158759485	883872	135235	455303	201187	3.35188e-05	0.782,0.67	0.553,0.47	0.214	-0.146
ENSG00000119231.10	SENP5	chr3	+	196927795	196927879	196903610	196929632	41,60	5,6	31,21	15,29	0.000287597	0.804,0.833	0.508,0.266	0.431	-0.393
ENSG00000119596.17	YLPM1	chr14	+	74824255	74824307	74821137	74829212	72,73	16,13	32,15	15,20	0.022204	0.728,0.77	0.559,0.309	0.315	-0.16
ENSG00000120334.15	CENPL	chr1	-	173806438	173806576	173803505	173807266	16,21	23,30	39,45	20,27	0.0256007	0.258,0.259	0.494,0.455	-0.216	-0.116
ENSG00000120685.19	PROSER1	chr13	-	39034130	39034196	39031631	39037197	80,67	7,4	51,22	10,16	0.0230292	0.86,0.9	0.732,0.424	0.302	-0.335
ENSG00000120699.12	EXOSC8	chr13	+	37002272	37002309	37001801	37002487	14,17	0,0	9,20	0,8	0.00894882	1.0,1.0	1.0,0.628	0.186	-0.184
ENSG00000120868.13	APAF1	chr12	+	98703370	98703499	98699569	98706484	100102	35,59	54,14	85,92	4.88568e-07	0.588,0.464	0.241,0.071	0.37	-0.281
ENSG00000123562.16	MORF4L2	chrX	-	103684680	103684729	103678651	103685170	272232	292311	140,73	367380	9.4447e-10	0.362,0.313	0.189,0.105	0.191	-0.206
ENSG00000123636.17	BAZ2B	chr2	-	159400598	159400664	159398894	159404848	58,76	2,3	29,7	10,1	0.0127615	0.94,0.931	0.608,0.789	0.237	-0.323
ENSG00000124181.14	PLCG1	chr20	+	41163202	41163275	41162725	41163377	94104	10,7	71,41	14,15	0.0337425	0.827,0.883	0.721,0.582	0.204	-0.182
ENSG00000124193.14	SRSF6	chr20	+	43459152	43459420	43458509	43459770	88137	49,42	110136	19,5	0.0015348	0.473,0.62	0.743,0.932	-0.291	0.399
ENSG00000125351.10	UPF3B	chrX	-	119840645	119840684	119838527	119841075	12,12	12,22	5,2	27,37	0.00190796	0.399,0.266	0.109,0.035	0.261	-0.152
ENSG00000125772.12	GPCPD1	chr20	-	5586193	5586269	5584322	5593326	8,8	21,12	1,0	24,20	0.000214165	0.16,0.25	0.02,0.0	0.195	-0.506
ENSG00000125844.15	RRBP1	chr20	-	17679998	17680075	17660528	17682027	54,49	101136	13,9	95,75	0.000145661	0.211,0.153	0.064,0.057	0.121	-0.198
ENSG00000126777.17	KTN1	chr14	+	55663954	55664041	55661612	55667240	78,68	114127	44,16	146108	0.000173552	0.255,0.211	0.131,0.069	0.133	-0.173
ENSG00000127054.18	CPSF3L	chr1	-	1314300	1314365	1313921	1314823	104139	3,9	108,60	22,12	0.0013341	0.949,0.893	0.726,0.73	0.193	-0.24
ENSG00000127483.17	HP1BP3	chr1	-	20780344	20780540	20779911	20787194	137152	18,23	216199	10,13	0.0202495	0.792,0.768	0.915,0.884	-0.119	0.11
ENSG00000128000.15	ZNF780B	chr19	-	40055415	40055576	40050377	40056100	10,14	5,2	9,6	1,0	0.0391722	0.5,0.778	0.818,1.0	-0.27	-0.261
ENSG00000128833.12	MYO5C	chr15	-	52271762	52271844	52269860	52272579	179196	9,7	141,91	36,74	1.36094e-06	0.909,0.933	0.662,0.381	0.399	-0.248
ENSG00000129197.14	RPAIN	chr17	+	5426235	5426299	5422829	5432541	14,16	29,38	6,6	37,48	0.0315016	0.208,0.186	0.081,0.064	0.124	-0.137
ENSG00000129317.14	PUS7L	chr12	-	43738309	43738391	43736661	43742456	66,72	0,1	34,10	4,4	0.0010811	1.0,0.973	0.81,0.556	0.303	-0.233
ENSG00000130158.13	DOCK6	chr19	-	11229297	11229390	11229035	11233202	58,41	39,60	14,15	50,31	0.0276066	0.426,0.255	0.123,0.195	0.182	-0.741
ENSG00000130177.14	CDC16	chr13	+	114261886	114261948	114259398	114262878	139156	9,23	84,56	26,43	0.0011345	0.895,0.789	0.641,0.418	0.313	-0.21
ENSG00000131375.9	CAPN7	chr3	+	15241452	15241588	15240853	15242177	95,88	26,71	61,29	96,76	0.00415197	0.646,0.383	0.241,0.16	0.314	-0.44
ENSG00000131375.9	CAPN7	chr3	+	15245525	15245671	15242253	15246731	145131	23,34	93,22	54,54	0.00108449	0.759,0.658	0.463,0.169	0.393	-0.303
ENSG00000132424.14	PNISR	chr6	-	99403828	99403882	99402710	99404602	154128	14,31	119,94	46,41	0.013915	0.866,0.708	0.603,0.573	0.199	-0.61
ENSG00000132716.18	DCAF8	chr1	-	160225061	160225119	160224549	160225590	105122	16,17	70,44	19,24	0.0470895	0.789,0.803	0.677,0.51	0.203	-0.238
ENSG00000132716.18	DCAF8	chr1	-	160220458	160220691	160218968	160222650	0,2	25,30	8,1	11,20	0.0332803	0.0,0.032	0.267,0.024	-0.13	0.237
ENSG00000133961.19	NUMB	chr14	-	73279280	73279424	73277293	73282358	164187	27,48	127,49	52,73	0.0200897	0.752,0.661	0.55,0.251	0.306	-0.349
ENSG00000134058.10	CDK7	chr5	+	69252417	69252451	69235453	69258042	92,94	4,10	84,47	17,55	0.010351	0.941,0.867	0.774,0.372	0.331	-0.234
ENSG00000134109.10	EDEM1	chr3	+	5210174	5210248	5208263	5211119	98,97	16,24	92,38	47,45	0.00235805	0.756,0.672	0.498,0.3	0.315	-0.289
ENSG00000134759.13	ELP2	chr18	+	36138794	36138872	36138426	36142825	288380	4,0	262173	16,48	1.09543e-08	0.973,1.0	0.891,0.643	0.219	-0.107
ENSG00000135049.15	AGTPBP1	chr9	-	85678334	85678398	85677582	85681267	36,39	4,4	21,13	7,18	0.0156128	0.83,0.841	0.62,0.282	0.384	-0.159
ENSG00000135597.18	REPS1	chr6	-	138917554	138917624	138915976	138920214	112112	8,10	42,20	8,18	0.0316497	0.879,0.854	0.732,0.367	0.317	-0.205
ENSG00000135597.18	REPS1	chr6	-	138917554	138917627	138915976	138920214	155160	8,10	63,29	8,18	0.0295172	0.908,0.891	0.801,0.451	0.273	-0.173
ENSG00000135837.15	CEP350	chr1	+	179990506	179990621	179987286	179992061	86,67	3,6	61,14	22,38	0.000156914	0.935,0.848	0.581,0.156	0.523	-0.133
ENSG00000136048.13	DRAM1	chr12	+	101920108	101920201	101914232	101921215	35,48	0,1	28,11	2,4	0.012708	1.0,0.96	0.875,0.579	0.253	-0.157
ENSG00000136051.13	KIAA1033	chr12	+	105156725	105156792	105152451	105157235	156160	0,1	126,57	6,8	0.000240963	1.0,0.988	0.918,0.791	0.139	-0.147
ENSG00000136122.15	BORA	chr13	+	72731280	72731387	72729093	72737961	14,13	10,17	4,4	31,12	0.00730961	0.412,0.277	0.061,0.143	0.243	-0.414
ENSG00000136122.15	BORA	chr13	+	72734959	72735005	72729093	72737961	8,7	10,17	2,1	31,12	0.00605898	0.333,0.205	0.039,0.05	0.225	-0.362
ENSG00000136536.14	MARCH7	chr2	+	159764625	159764674	159762993	159767283	165167	17,21	82,11	35,31	0.00141011	0.855,0.829	0.588,0.178	0.459	-0.274
ENSG00000136754.16	ABI1	chr10	-	26759061	26759238	26751783	26765217	144177	35,52	214215	20,20	0.000157776	0.673,0.63	0.843,0.843	-0.192	0.152
ENSG00000136861.17	CDK5RAP2	chr9	-	120460571	120460747	120458622	120467859	41,40	20,19	24,4	27,16	0.0201549	0.506,0.513	0.308,0.111	0.3	-0.313
ENSG00000136936.10	XPA	chr9	-	97682199	97682430	97675587	97684922	18,26	110,81	32,36	60,33	0.00225588	0.076,0.138	0.211,0.353	-0.175	0.109
ENSG00000137145.20	DENND4C	chr9	+	19371755	19371820	19369987	19372036	120132	1,3	110,70	13,29	8.19161e-06	0.985,0.96	0.82,0.566	0.279	-0.137
ENSG00000137312.14	FLOT1	chr6	-	30741189	30741333	30740798	30741613	7671094	42,64	684511	98101	1.03422e-08	0.901,0.895	0.777,0.717	0.151	-0.105
ENSG00000137501.17	SYTL2	chr11	-	85714412	85714507	85711232	85718789	416275	12,23	220,71	21,21	0.0236979	0.945,0.857	0.84,0.628	0.167	-0.104
ENSG00000137574.10	TGS1	chr8	+	55782747	55782812	55773719	55785718	41,60	2,5	23,5	5,8	0.0402336	0.917,0.866	0.713,0.252	0.409	-0.152
ENSG00000137807.13	KIF23	chr15	+	69440767	69441079	69440487	69444789	70111	22,11	205151	10,5	0.00723694	0.614,0.835	0.911,0.938	-0.2	0.422
ENSG00000138069.16	RAB1A	chr2	-	65088938	65089070	65088690	65097970	388394	10,17	304223	45170	0.000111509	0.951,0.921	0.772,0.396	0.352	-0.107
ENSG00000138078.15	PREPL	chr2	-	44321826	44321900	44321445	44322730	133107	3,10	45,18	9,10	0.00718553	0.957,0.844	0.717,0.477	0.303	-0.107
ENSG00000138231.12	DBR1	chr3	-	138163777	138163858	138163494	138167080	54,54	0,3	40,5	11,23	0.000123933	1.0,0.9	0.645,0.098	0.579	-0.264
ENSG00000138382.13	METTL5	chr2	-	169815476	169815528	169812506	169819560	261373	21,29	176,92	57,94	1.01946e-05	0.881,0.884	0.648,0.368	0.375	-0.345
ENSG00000138592.13	USP8	chr15	+	50484274	50484361	50482065	50489800	193147	189293	39,14	233148	5.53013e-10	0.338,0.201	0.077,0.045	0.209	-0.203
ENSG00000138674.16	SEC31A	chr4	-	82862533	82862572	82857764	82863317	45,59	157209	17,10	174152	2.0358e-05	0.16,0.158	0.061,0.042	0.107	-0.256
ENSG00000138674.16	SEC31A	chr4	-	82862533	82862572	82861708	82863317	128159	21,19	91,36	32,22	0.0027419	0.802,0.847	0.654,0.521	0.237	-0.235
ENSG00000139211.6	AMIGO2	chr12	-	47079141	47079248	47079065	47079461	606564	304272	473159	492267	8.02207e-08	0.499,0.509	0.325,0.229	0.227	0.113
ENSG00000139211.6	AMIGO2	chr12	-	47079146	47079248	47079065	47079461	446390	304272	321104	492267	1.63516e-09	0.423,0.418	0.246,0.163	0.216	0.129
ENSG00000139323.13	POC1B	chr12	-	89425160	89425379	89421257	89459637	137193	15,15	196152	4,1	0.000263393	0.82,0.865	0.961,0.987	-0.131	0.22
ENSG00000140463.13	BBS4	chr15	+	72715290	72715402	72712307	72716777	42,69	4,4	66,43	0,0	0.0115133	0.84,0.896	1.0,1.0	-0.132	-0.215
ENSG00000140750.16	ARHGAP17	chr16	-	24939363	24939597	24935639	24941986	29,31	19,31	11,3	23,26	0.00423478	0.433,0.333	0.193,0.055	0.259	0.376
ENSG00000141736.13	ERBB2	chr17	+	39719786	39719834	39717480	39723318	89,90	5,11	104,68	28,40	0.00102203	0.916,0.834	0.695,0.511	0.272	-0.327
ENSG00000141959.16	PFKL	chr21	+	44311005	44311083	44306754	44312104	546574	10,18	196148	15,31	1.8408e-05	0.965,0.941	0.867,0.705	0.167	-0.113
ENSG00000142949.16	PTPRF	chr1	+	43602070	43602097	43598913	43603415	265240	365566	87,19	397184	3.48521e-07	0.35,0.239	0.14,0.071	0.189	-0.148
ENSG00000143033.17	MTF2	chr1	+	93120548	93120672	93119401	93133702	13,28	0,0	13,2	0,13	0.0271419	1.0,1.0	1.0,0.071	0.465	-0.269
ENSG00000143341.11	HMCN1	chr1	+	186117458	186117623	186117115	186119190	133127	10,9	49,23	13,13	0.00162916	0.869,0.876	0.653,0.469	0.312	-0.202
ENSG00000143393.16	PI4KB	chr1	-	151326171	151326373	151316509	151327270	133174	19,12	126137	8,0	0.0301575	0.778,0.879	0.887,1.0	-0.115	0.227
ENSG00000143409.15	FAM63A	chr1	-	151002164	151002968	151001782	151006311	70,79	7,6	50,36	0,1	0.00952246	0.833,0.868	1.0,0.947	-0.123	0.148
ENSG00000143409.15	FAM63A	chr1	-	151002164	151002323	151001782	151006311	78,85	7,6	54,36	0,1	0.0115783	0.848,0.876	1.0,0.947	-0.112	0.149
ENSG00000143409.15	FAM63A	chr1	-	151002164	151002400	151001782	151006311	66,72	7,6	48,30	0,1	0.00943155	0.825,0.857	1.0,0.938	-0.128	0.164
ENSG00000143409.15	FAM63A	chr1	-	151002164	151002170	151001782	151006311	4,6	7,6	9,1	0,1	0.0125161	0.349,0.484	1.0,0.484	-0.326	0.371
ENSG00000143416.20	SELENBP1	chr1	-	151366274	151366453	151365846	151366721	144153	21,21	103,77	27,30	0.0306289	0.774,0.785	0.656,0.562	0.171	-0.226
ENSG00000143553.10	SNAPIN	chr1	+	153659137	153659184	153658886	153659447	232182	41,47	125,59	74,46	4.33773e-06	0.778,0.706	0.511,0.443	0.265	-0.288
ENSG00000143850.12	PLEKHA6	chr1	-	204223461	204223585	204222779	204228082	58,74	3,10	32,13	0,0	0.00514416	0.906,0.787	1.0,1.0	-0.153	0.32
ENSG00000144674.16	GOLGA4	chr3	+	37289234	37289289	37282272	37294978	34,45	17,27	31,22	44,82	0.000309543	0.538,0.492	0.291,0.135	0.302	-0.373
ENSG00000144674.16	GOLGA4	chr3	+	37361242	37361305	37355187	37366079	115146	33,49	79,32	61,82	0.000494666	0.656,0.62	0.415,0.176	0.343	-0.294
ENSG00000144674.16	GOLGA4	chr3	+	37289234	37289291	37282272	37294978	128166	17,27	113,55	44,82	0.00314752	0.812,0.779	0.595,0.277	0.36	-0.27
ENSG00000148337.20	CIZ1	chr9	-	128187862	128187934	128185776	128190328	399412	26,40	294227	59,48	0.0001506	0.887,0.841	0.719,0.708	0.15	-0.109
ENSG00000148498.15	PARD3	chr10	-	34372497	34372536	34360259	34374873	61,82	153223	40,18	218174	0.000104607	0.209,0.196	0.109,0.064	0.116	-0.135
ENSG00000148814.17	LRRC27	chr10	+	132342212	132342271	132337695	132344497	22,18	3,11	8,1	12,10	0.0161884	0.805,0.48	0.273,0.053	0.48	-0.436
ENSG00000149182.14	ARFGAP2	chr11	-	47172280	47172333	47171800	47175014	65,88	9,3	55,35	10,30	0.0332118	0.81,0.945	0.765,0.408	0.291	-0.296
ENSG00000149532.15	CPSF7	chr11	-	61420469	61420530	61420094	61421389	44,49	2,4	34,32	7,10	0.0424279	0.924,0.872	0.73,0.64	0.213	-0.345
ENSG00000149554.12	CHEK1	chr11	+	125637448	125637544	125635533	125643791	40,25	2,11	16,13	19,21	0.00826125	0.909,0.532	0.296,0.236	0.455	-0.465
ENSG00000149577.15	SIDT2	chr11	+	117186129	117186223	117184139	117187377	42,83	1,0	47,44	7,3	0.00314752	0.955,1.0	0.77,0.88	0.153	-0.4
ENSG00000150403.17	TMCO3	chr13	+	113503495	113503588	113501880	113510237	411324	27,60	156,62	50,47	0.00130448	0.884,0.73	0.609,0.397	0.304	-0.16
ENSG00000151135.9	TMEM263	chr12	+	106957081	106957149	106956065	106967110	138166	89,87	115,47	128247	0.00025448	0.45,0.502	0.322,0.091	0.269	-0.13
ENSG00000151465.13	CDC123	chr10	+	12215739	12215835	12210322	12217360	240216	4,8	155,77	17,38	0.00016605	0.968,0.931	0.82,0.503	0.288	-0.137
ENSG00000151640.12	DPYSL4	chr10	+	132202645	132202825	132202116	132203761	77,94	26,20	107,80	16,2	0.041088	0.597,0.701	0.77,0.952	-0.212	-0.231
ENSG00000152117.17	AC093838.4	chr2	+	131519813	131519942	131519666	131520096	6,11	45,51	29,65	43,45	3.41083e-05	0.063,0.097	0.252,0.419	-0.256	0.211
ENSG00000152256.13	PDK1	chr2	+	172568740	172568817	172566933	172570725	409453	44,71	297137	101110	0.000117968	0.823,0.761	0.595,0.384	0.303	-0.51
ENSG00000152457.17	DCLRE1C	chr10	-	14947524	14947609	14945189	14949035	5,7	11,10	1,0	19,10	0.00126792	0.185,0.259	0.026,0.0	0.209	-0.283
ENSG00000152601.17	MBNL1	chr3	+	152455541	152455577	152447773	152456266	49,51	40,36	26,10	42,45	0.00501302	0.455,0.491	0.297,0.132	0.258	-0.377
ENSG00000152952.11	PLOD2	chr3	-	146077861	146077924	146073352	146079115	173225	21,19	184154	52,85	4.12896e-05	0.819,0.866	0.66,0.498	0.264	-0.239
ENSG00000153113.23	CAST	chr5	+	96729152	96729209	96727530	96729611	535608	84103	375251	166133	1.49867e-10	0.785,0.772	0.564,0.519	0.237	-0.168
ENSG00000153944.10	MSI2	chr17	+	57676986	57677059	57675126	57679548	302295	27,21	184,89	40,42	0.000195149	0.851,0.878	0.701,0.519	0.255	-0.358
ENSG00000154265.15	ABCA5	chr17	-	69251746	69251866	69250621	69253572	285280	10,15	155114	11,24	0.0314671	0.934,0.903	0.876,0.704	0.129	-0.359
ENSG00000155066.15	PROM2	chr2	+	95276971	95277061	95276347	95277363	15,23	11,15	31,32	5,4	0.00495503	0.405,0.434	0.756,0.8	-0.359	-0.489
ENSG00000155189.11	AGPAT5	chr8	+	6724869	6724939	6708887	6730710	53,90	1,7	70,20	19,17	0.000678052	0.965,0.87	0.657,0.38	0.399	-0.178
ENSG00000156860.15	FBRS	chr16	+	30661303	30661333	30660442	30662419	52,44	32,39	29,18	41,43	0.031714	0.54,0.449	0.338,0.232	0.21	-0.341
ENSG00000157106.16	SMG1	chr16	-	18899986	18900044	18896956	18925949	34,37	48,47	14,9	56,46	0.00109303	0.287,0.309	0.124,0.1	0.186	-0.237
ENSG00000157538.13	DSCR3	chr21	-	37233361	37233442	37232451	37238459	115177	13,6	82,34	29,30	1.02687e-05	0.816,0.937	0.586,0.362	0.403	-0.217
ENSG00000157796.17	WDR19	chr4	+	39189655	39189781	39186604	39203641	15,19	0,0	9,4	1,3	0.0260933	1.0,1.0	0.818,0.4	0.391	-0.147
ENSG00000157954.14	WIPI2	chr7	+	5193117	5193171	5190493	5199575	43,35	49100	12,4	48,36	0.0325787	0.34,0.17	0.128,0.061	0.161	-0.186
ENSG00000158106.12	RHPN1	chr8	+	143376524	143376653	143375668	143377379	60,54	6,4	32,33	0,0	0.00486936	0.833,0.871	1.0,1.0	-0.148	-0.3
ENSG00000158402.18	CDC25C	chr5	-	138329552	138329647	138328529	138330986	60,62	10,12	45,24	33,28	2.71949e-05	0.75,0.721	0.405,0.3	0.383	-0.29
ENSG00000158545.15	ZC3H18	chr16	+	88587541	88587613	88586684	88598177	38,32	32,59	19,14	50,58	0.0426093	0.379,0.218	0.163,0.11	0.162	-0.214
ENSG00000160410.14	SHKBP1	chr19	+	40578153	40578212	40577709	40578461	40,38	0,1	39,18	3,4	0.0174513	1.0,0.955	0.88,0.717	0.179	-0.176
ENSG00000160439.15	RDH13	chr19	-	55048045	55048257	55047488	55048328	44,67	65,53	89,59	40,12	0.00925501	0.253,0.387	0.527,0.711	-0.299	0.323
ENSG00000160796.16	NBEAL2	chr3	+	46998066	46998226	46997694	46998462	40,51	10,7	17,22	14,18	0.00280747	0.667,0.785	0.378,0.379	0.347	-0.443
ENSG00000162910.18	MRPL55	chr1	-	228108436	228108474	228108318	228109148	14,28	53,48	43,49	38,12	0.00865361	0.15,0.281	0.431,0.732	-0.366	0.233
ENSG00000162959.13	MEMO1	chr2	-	31883385	31883462	31869952	31891991	118142	11,19	70,43	24,24	0.000544621	0.843,0.789	0.593,0.473	0.283	-0.159
ENSG00000163002.12	NUP35	chr2	+	183151507	183151649	183133623	183157443	107128	5,3	111,57	7,15	0.0455804	0.915,0.955	0.888,0.655	0.163	-0.122
ENSG00000163125.15	RPRD2	chr1	+	150441880	150441958	150441023	150443230	98,84	84112	39,8	105,77	1.1136e-05	0.368,0.273	0.157,0.049	0.217	-0.207
ENSG00000163319.10	MRPS18C	chr4	+	83458345	83458429	83456958	83459739	169158	40,81	90,31	122104	2.92201e-06	0.679,0.494	0.269,0.13	0.387	-0.273
ENSG00000163517.14	HDAC11	chr3	+	13496735	13496852	13483564	13501870	20,23	7,2	15,11	13,11	0.0497189	0.588,0.852	0.366,0.333	0.37	-0.867
ENSG00000163517.14	HDAC11	chr3	+	13496735	13496852	13483564	13500712	21,25	4,13	16,10	23,19	0.0156128	0.724,0.49	0.258,0.208	0.374	-0.385
ENSG00000163607.14	GTPBP8	chr3	+	112995136	112995265	112993124	112996891	15,27	2,6	23,11	0,1	0.021266	0.789,0.692	1.0,0.846	-0.183	-0.51
ENSG00000163689.18	C3orf67	chr3	-	58913707	58913864	58884709	58937647	21,16	4,4	22,8	0,0	0.00117475	0.724,0.667	1.0,1.0	-0.304	0.227
ENSG00000163714.17	U2SURP	chr3	+	143023974	143024018	143023064	143027148	58,51	12,10	17,3	14,26	0.000441928	0.754,0.764	0.436,0.068	0.507	-0.264
ENSG00000163719.18	MTMR14	chr3	+	9697710	9697866	9689082	9701789	24,44	7,5	41,20	0,0	0.000385604	0.632,0.815	1.0,1.0	-0.276	0.341
ENSG00000164548.10	TRA2A	chr7	-	23522353	23522432	23521840	23531788	27,31	22,32	21,15	50,39	0.016084	0.38,0.326	0.174,0.161	0.185	0.361
ENSG00000164548.10	TRA2A	chr7	-	23522131	23522432	23521840	23531788	31,33	22,32	21,21	50,39	0.0229419	0.413,0.34	0.174,0.212	0.183	0.382
ENSG00000164548.10	TRA2A	chr7	-	23522120	23522432	23521840	23531788	44,56	22,32	32,18	50,39	0.000304286	0.5,0.467	0.242,0.188	0.269	0.403
ENSG00000164638.10	SLC29A4	chr7	+	5296935	5297198	5291821	5298987	27,36	5,6	23,42	1,1	0.0372668	0.73,0.75	0.92,0.955	-0.198	-0.195
ENSG00000164830.17	OXR1	chr8	+	106737519	106737600	106713985	106739457	93100	189286	58,23	288236	4.03711e-06	0.197,0.149	0.091,0.046	0.104	-0.105
ENSG00000164877.18	MICALL2	chr7	-	1434209	1435147	1428791	1436741	65,44	20,20	24,13	24,16	0.0150311	0.619,0.524	0.333,0.289	0.261	-0.309
ENSG00000164877.18	MICALL2	chr7	-	1435100	1435147	1434672	1436741	60,49	2,6	26,27	17,11	0.00026398	0.949,0.835	0.487,0.603	0.347	-0.234
ENSG00000165025.14	SYK	chr9	+	90867130	90867199	90865097	90874203	14,10	9,3	3,7	0,0	0.000331589	0.449,0.636	1.0,1.0	-0.458	-0.609
ENSG00000165105.9	RASEF	chr9	-	83007436	83007505	83005500	83009640	129127	12,20	59,14	26,10	0.00102884	0.849,0.769	0.543,0.423	0.326	-0.193
ENSG00000165219.21	GAPVD1	chr9	+	125342218	125342299	125341264	125346818	168205	1,5	169,82	14,59	0.000326291	0.988,0.953	0.858,0.41	0.336	-0.107
ENSG00000165233.17	CARD19	chr9	+	93111878	93111938	93110721	93112217	121120	23,38	114,83	57,73	0.00851092	0.746,0.639	0.528,0.389	0.234	-0.556
ENSG00000165275.9	TRMT10B	chr9	+	37769940	37770019	37768228	37770671	30,32	1,1	14,3	4,2	0.0261718	0.938,0.941	0.636,0.429	0.407	-0.29
ENSG00000165629.19	ATP5C1	chr10	+	7806973	7807010	7802854	7807658	13041639	23,40	12551026	98206	0	0.975,0.965	0.896,0.771	0.136	-0.102
ENSG00000165802.19	NSMF	chr9	-	137455238	137455307	137454443	137456410	98,81	54,78	34,13	56,54	0.00197285	0.488,0.353	0.242,0.112	0.243	-0.404
ENSG00000165923.15	AGBL2	chr11	-	47699445	47699553	47692256	47704542	11,13	0,1	1,3	4,1	0.0018238	1.0,0.867	0.111,0.6	0.578	0.355
ENSG00000166046.10	TCP11L2	chr12	+	106304092	106304231	106302941	106311040	16,19	17,19	5,6	25,21	0.00904696	0.32,0.333	0.091,0.125	0.219	-0.239
ENSG00000166987.14	MBD6	chr12	+	57526565	57527227	57526388	57527506	172171	4,16	91,43	14,19	0.00796807	0.956,0.842	0.765,0.531	0.251	-0.127
ENSG00000167110.16	GOLGA2	chr9	-	128267193	128267274	128266020	128267457	56,54	25,62	18,19	64,60	0.00078815	0.528,0.303	0.123,0.137	0.285	-0.56
ENSG00000167110.16	GOLGA2	chr9	-	128266286	128266325	128266020	128267457	532742	25,62	286194	64,60	1.24863e-10	0.934,0.888	0.748,0.682	0.196	-0.123
ENSG00000167491.17	GATAD2A	chr19	+	19501968	19502043	19501416	19502330	176197	7,21	130103	31,14	0.0336007	0.927,0.825	0.679,0.787	0.143	-0.182
ENSG00000167522.14	ANKRD11	chr16	-	89291680	89291777	89291183	89305205	36,30	62,86	14,5	75109	3.30138e-05	0.225,0.149	0.085,0.022	0.134	-0.131
ENSG00000168447.10	SCNN1B	chr16	+	23371775	23371883	23371462	23375737	39,58	1,1	75,81	11,5	0.0294714	0.951,0.967	0.773,0.89	0.127	-0.246
ENSG00000168769.12	TET2	chr4	+	105241338	105241429	105237351	105242833	50,66	2,0	38,6	7,4	0.0012388	0.926,1.0	0.731,0.429	0.383	-0.163
ENSG00000169057.19	MECP2	chrX	-	154092183	154092307	154032557	154097603	40,83	13,28	37,36	31,48	0.00102918	0.606,0.597	0.374,0.273	0.278	-0.299
ENSG00000169398.19	PTK2	chr8	-	140925660	140925749	140890769	141001124	122127	51,51	117,79	86143	0.00485813	0.545,0.555	0.405,0.216	0.24	-0.215
ENSG00000169689.14	STRA13	chr17	-	82019640	82019694	82019381	82019857	45,53	91,75	81116	68,83	0.00265663	0.225,0.293	0.411,0.45	-0.171	-0.253
ENSG00000170832.12	USP32	chr17	-	60212023	60212098	60211514	60213580	620747	14,56	403124	286395	0	0.957,0.87	0.415,0.136	0.638	-0.412
ENSG00000170921.14	TANC2	chr17	+	63418306	63418407	63415674	63419998	679907	56,99	902407	161119	0.0001506	0.858,0.821	0.737,0.631	0.155	-0.136
ENSG00000171729.13	TMEM51	chr1	+	15210489	15210562	15153954	15214894	14,16	1,0	25,6	2,4	0.0368407	0.877,1.0	0.864,0.434	0.289	-0.606
ENSG00000171843.15	MLLT3	chr9	-	20354807	20354879	20346574	20360741	167254	5,9	225192	14,36	0.00696006	0.945,0.935	0.892,0.733	0.127	-0.111
ENSG00000172500.12	FIBP	chr11	-	65886321	65886422	65885663	65887599	221250	3,11	190174	14,21	0.00685574	0.974,0.919	0.872,0.806	0.108	-0.104
ENSG00000172869.14	DMXL1	chr5	+	119238988	119239080	119237414	119240418	139142	4,6	77,23	10,6	0.0170719	0.946,0.922	0.794,0.657	0.208	-0.257
ENSG00000172939.8	OXSR1	chr3	+	38242742	38242778	38236961	38246074	71120	3,11	63,25	11,15	0.0234938	0.942,0.881	0.796,0.532	0.247	-0.14
ENSG00000173726.10	TOMM20	chr1	-	235119338	235119406	235113910	235119817	93139	149186	59,51	243242	2.30365e-08	0.248,0.283	0.114,0.1	0.158	0.248
ENSG00000175198.14	PCCA	chr13	+	100515426	100515567	100449305	100527674	29,36	1,1	22,13	4,5	0.0156249	0.935,0.947	0.733,0.565	0.292	0.206
ENSG00000176623.11	RMDN1	chr8	-	86494828	86494966	86488639	86506994	100179	273318	92,83	87116	0.0110147	0.155,0.22	0.346,0.263	-0.117	0.128
ENSG00000179950.13	PUF60	chr8	-	143820665	143820716	143818534	143821596	52,31	45,66	20,12	71,71	0.00724608	0.409,0.22	0.145,0.092	0.196	-0.281
ENSG00000180098.9	TRNAU1AP	chr1	+	28574588	28574718	28571900	28577499	62,90	93,69	88105	46,24	0.0174297	0.25,0.395	0.489,0.686	-0.265	0.106
ENSG00000180098.9	TRNAU1AP	chr1	+	28561112	28561260	28560732	28561345	54,91	38,46	85,75	18,23	0.024669	0.415,0.497	0.702,0.62	-0.205	0.285
ENSG00000180530.9	NRIP1	chr21	-	15014343	15014466	14968526	15043494	98,80	15,14	22,11	20,9	7.46557e-05	0.766,0.741	0.355,0.379	0.387	-0.144
ENSG00000180776.15	ZDHHC20	chr13	-	21421060	21421164	21391854	21459053	10,10	0,0	14,15	0,5	0.0379979	1.0,1.0	1.0,0.6	0.2	0.236
ENSG00000180776.15	ZDHHC20	chr13	-	21413651	21413772	21391854	21459053	10,29	0,0	18,19	0,5	0.0463865	1.0,1.0	1.0,0.655	0.172	0.339
ENSG00000181392.14	SYNE4	chr19	-	36008216	36008367	36006944	36008553	25,22	3,6	34,30	1,1	0.0436753	0.806,0.647	0.944,0.938	-0.214	-0.214
ENSG00000182473.21	EXOC7	chr17	-	76090328	76090397	76089320	76094413	47,56	99143	7,3	63,39	0.000146431	0.199,0.17	0.055,0.039	0.138	-0.554
ENSG00000183250.11	LINC01547	chr21	-	44937538	44937682	44935890	44939592	5,2	3,9	0,0	2,2	0.0140324	0.455,0.1	0.0,0.0	0.278	-0.209
ENSG00000183943.5	PRKX	chrX	-	3611221	3611334	3608945	3612176	30,38	13,17	33,23	3,2	0.00764905	0.536,0.528	0.846,0.852	-0.317	0.523
ENSG00000186973.10	FAM183A	chr1	+	43152827	43152979	43150820	43156205	12,8	2,3	7,1	0,0	0.00554259	0.75,0.571	1.0,1.0	-0.34	-0.433
ENSG00000186973.10	FAM183A	chr1	+	43152827	43152931	43150820	43156205	29,18	2,3	13,5	0,0	0.0450501	0.879,0.75	1.0,1.0	-0.185	-0.362
ENSG00000188559.13	RALGAPA2	chr20	-	20637362	20637501	20635617	20639784	66,56	26,37	24,10	32,25	0.00573826	0.559,0.431	0.273,0.167	0.275	-0.316
ENSG00000188917.14	TRMT2B	chrX	-	101051250	101051733	101042312	101051816	31,35	5,2	17,4	0,0	0.014344	0.756,0.897	1.0,1.0	-0.173	0.241
ENSG00000188917.14	TRMT2B	chrX	-	101051643	101051733	101042312	101051816	27,31	5,2	17,5	0,0	0.0103402	0.73,0.886	1.0,1.0	-0.192	0.329
ENSG00000196387.9	ZNF140	chr12	+	133100986	133101053	133083561	133105509	9,12	20,41	0,1	17,33	0.000255273	0.193,0.135	0.0,0.016	0.156	-0.464
ENSG00000196405.12	EVL	chr14	+	100139333	100139369	100138897	100141179	13,14	21,21	7,4	27,34	0.0271187	0.297,0.312	0.15,0.074	0.193	-0.501
ENSG00000196776.14	CD47	chr3	-	108049618	108049651	108047292	108057476	33,17	92136	13,3	161209	3.38452e-05	0.201,0.081	0.054,0.01	0.109	-0.408
ENSG00000197323.10	TRIM33	chr1	-	114430797	114430912	114427894	114433616	529667	23,66	557353	84157	0.00199445	0.92,0.835	0.768,0.529	0.229	-0.131
ENSG00000197563.9	PIGN	chr18	-	62140419	62140479	62139075	62143305	25,42	1,0	15,12	3,4	0.00288125	0.933,1.0	0.737,0.627	0.285	-0.37
ENSG00000197912.13	SPG7	chr16	+	89545871	89546030	89544772	89546657	32,49	105,84	30,26	29,18	0.00779076	0.132,0.226	0.341,0.419	-0.201	0.147
ENSG00000198000.11	NOL8	chr9	-	92311145	92311259	92310675	92314266	106,98	10,18	54,18	18,20	0.0219244	0.841,0.731	0.6,0.31	0.331	-0.46
ENSG00000198000.11	NOL8	chr9	-	92319942	92320137	92319356	92321667	6,16	64,59	13,14	20,17	0.00452393	0.045,0.119	0.245,0.292	-0.186	0.102
ENSG00000198000.11	NOL8	chr9	-	92319942	92320379	92319356	92321667	7,14	64,59	10,12	20,17	0.0262445	0.052,0.106	0.2,0.261	-0.152	0.126
ENSG00000198265.11	HELZ	chr17	-	67193966	67194042	67190355	67201128	134174	4,17	172109	31,40	0.0014545	0.944,0.837	0.735,0.577	0.235	-0.214
ENSG00000198265.11	HELZ	chr17	-	67195418	67195470	67190355	67201128	106118	4,17	103,61	31,40	0.000672321	0.94,0.805	0.664,0.476	0.302	-0.155
ENSG00000198496.10	NBR2	chr17	+	43131207	43131270	43125770	43138656	17,9	1,5	8,1	11,8	0.024669	0.903,0.496	0.285,0.064	0.525	-0.444
ENSG00000198707.14	CEP290	chr12	-	88109065	88109181	88107098	88111201	28,35	0,1	21,5	1,5	0.0172271	1.0,0.946	0.913,0.333	0.35	-0.196
ENSG00000203485.12	INF2	chr14	+	104715283	104715340	104714856	104718794	267266	9,33	192105	50135	0.00126269	0.944,0.822	0.687,0.308	0.385	-0.162
ENSG00000204580.11	DDR1	chr6	+	30885624	30885680	30883165	30888687	71,66	57,48	23,16	50,72	5.27775e-06	0.418,0.442	0.21,0.114	0.268	-0.232
ENSG00000204713.10	TRIM27	chr6	-	28907235	28907262	28904665	28908807	121110	8,6	57,22	11,11	0.00736819	0.918,0.932	0.794,0.598	0.229	-0.164
ENSG00000205981.6	DNAJC19	chr3	-	180986942	180987022	180985996	180988022	142159	46,68	96154	94,90	0.0288457	0.607,0.539	0.338,0.461	0.173	-0.407
ENSG00000225190.8	PLEKHM1	chr17	-	45468208	45468593	45458439	45475099	12,7	4,2	12,10	1,0	0.0177221	0.6,0.636	0.857,1.0	-0.31	0.205
ENSG00000226174.6	TEX22	chr14	+	105449358	105449409	105445511	105450057	123179	244366	41,37	185216	8.15881e-06	0.232,0.227	0.117,0.093	0.124	-0.23
ENSG00000240344.8	PPIL3	chr2	-	200882341	200882435	200881488	200885697	238268	38,58	188144	70,77	0.000600455	0.758,0.698	0.573,0.483	0.2	-0.32
ENSG00000248727.5	CTC-236F12.4	chr5	-	56464008	56464116	56457943	56467711	21,14	1,4	14,2	0,0	0.0227287	0.913,0.636	1.0,1.0	-0.226	0.252
ENSG00000251022.6	THAP9-AS1	chr4	-	82895691	82895774	82894847	82900076	28,25	16,14	25,9	42,39	0.000867116	0.467,0.472	0.229,0.103	0.303	-0.4
ENSG00000251022.6	THAP9-AS1	chr4	-	82897988	82898062	82894847	82900076	30,20	16,14	10,4	42,39	6.68505e-08	0.487,0.42	0.108,0.049	0.375	-0.393
ENSG00000251369.8	ZNF550	chr19	-	57543650	57544583	57543243	57546456	35,31	1,0	15,12	1,4	0.03049	0.946,1.0	0.882,0.6	0.232	-0.184
ENSG00000261732.1	LA16c-431H6.6	chr16	+	1667334	1667400	1666600	1667961	55,52	6,6	59,22	0,2	0.0464718	0.831,0.823	1.0,0.855	-0.101	-0.23
ENSG00000265681.7	RPL17	chr18	-	49491745	49491833	49491584	49492274	68101	47,53	119120	34,38	0.0264947	0.42,0.488	0.636,0.612	-0.17	0.239
ENSG00000265681.7	RPL17	chr18	-	49491735	49491833	49491584	49492274	250347	47,53	383424	34,38	0.0216225	0.727,0.766	0.849,0.848	-0.102	0.37
ENSG00000266714.6	MYO15B	chr17	+	75591976	75592080	75591712	75592237	107,80	13,9	55,74	4,0	0.044598	0.805,0.816	0.873,1.0	-0.126	0.191
ENSG00000275052.4	PPP4R3B	chr2	-	55578246	55578342	55577356	55579678	69,51	98121	24,5	101,31	0.00755379	0.26,0.174	0.106,0.075	0.127	-0.225

## Sheet: both_MXE
GENCODE_GeneID	geneSymbol	chr	strand	X1stExonStart_0base	X1stExonEnd	X2ndExonStart_0base	X2ndExonEnd	upstreamES	upstreamEE	downstreamES	downstreamEE	IJC_SAMPLE_1	SJC_SAMPLE_1	IJC_SAMPLE_2	SJC_SAMPLE_2	FDR	IncLevel1	IncLevel2	siMBNL2.IncLevelDifference	MCF-7.IncLevelDifference
ENSG00000046651.14	OFD1	chrX	+	13763744	13763855	13767126	13767284	13762343	13762444	13768053	13768224	206205	117126	163131	148168	0.0112119	0.638,0.619	0.524,0.438	0.148	-0.176
ENSG00000060971.17	ACAA1	chr3	-	38131925	38132005	38133951	38134009	38129289	38129388	38136591	38136685	43,43	18,23	21,15	21,31	0.0350918	0.731,0.68	0.532,0.355	0.262	-0.441
ENSG00000064787.12	BCAS1	chr20	-	53957431	53957497	53966905	53967073	53953431	53953695	53985286	53985499	116168	436388	103,61	83,6	0.000269889	0.199,0.288	0.537,0.905	-0.478	0.28
ENSG00000101040.19	ZMYND8	chr20	-	47212641	47212725	47220257	47220324	47209213	47210897	47221313	47221474	322398	232212	314211	42,11	0	0.596,0.666	0.888,0.953	-0.289	0.115
ENSG00000101150.17	TPD52L2	chr20	+	63882718	63882820	63889189	63889238	63873667	63873816	63889849	63891545	143188	402475	337387	465378	1.90169e-06	0.226,0.245	0.373,0.456	-0.179	0.104
ENSG00000103248.18	MTHFSD	chr16	-	86552032	86552146	86552178	86552292	86548463	86548577	86554644	86554748	67,41	58,66	25,7	73,28	0.0206146	0.536,0.383	0.255,0.2	0.232	-0.191
ENSG00000105953.14	OGDH	chr7	+	44647443	44647534	44647656	44647759	44645326	44645518	44656317	44656362	12,17	54,74	3,3	97,31	0.00397093	0.182,0.187	0.03,0.088	0.126	-0.145
ENSG00000105953.14	OGDH	chr7	+	44647443	44647534	44647656	44647759	44645326	44645518	44666735	44666851	30,37	119141	14,9	159,62	0.0176627	0.201,0.208	0.081,0.127	0.101	-0.108
ENSG00000111596.11	CNOT2	chr12	+	70310894	70311017	70319297	70319364	70278131	70278274	70335437	70335563	92102	60100	70,60	109138	0.00363243	0.59,0.489	0.376,0.29	0.207	-0.1
ENSG00000114268.11	PFKFB4	chr3	-	48539696	48539771	48543579	48543646	48538500	48538619	48549863	48549960	213293	42,53	369261	121119	0.0013576	0.843,0.854	0.763,0.699	0.118	-0.287
ENSG00000117625.13	RCOR3	chr1	+	211295675	211295753	211312354	211312487	211289331	211289396	211312719	211312819	64,51	12,25	44,47	48,75	0.000397036	0.842,0.671	0.478,0.385	0.325	-0.16
ENSG00000128923.10	FAM63B	chr15	+	58821716	58821819	58831773	58831916	58810229	58810388	58847296	58847470	25,21	43,43	18,6	54,85	0.0302863	0.368,0.328	0.25,0.066	0.19	-0.243
ENSG00000134058.10	CDK7	chr5	+	69252417	69252451	69258042	69258153	69235142	69235453	69262204	69262304	87,92	4,14	82,44	22,73	0.00597687	0.968,0.901	0.838,0.456	0.287	-0.151
ENSG00000134152.10	KATNBL1	chr15	-	34148631	34148750	34152789	34153069	34145397	34145491	34154643	34154684	30,42	0,4	56,41	26,35	3.58228e-06	1.0,0.913	0.683,0.539	0.346	-0.179
ENSG00000136828.18	RALGPS1	chr9	+	126977694	126977745	127034430	127034514	126965843	126965951	127052846	127052939	25,31	8,1	15,10	10,12	0.015444	0.789,0.974	0.643,0.5	0.31	-0.33
ENSG00000137807.13	KIF23	chr15	+	69440767	69441079	69444789	69445041	69440307	69440487	69446008	69446091	43,73	116122	147109	160119	0.0258346	0.27,0.374	0.479,0.478	-0.156	0.181
ENSG00000137807.13	KIF23	chr15	+	69439903	69440077	69440307	69440487	69438247	69438405	69444789	69445041	58,72	22,11	102,87	10,6	0.0418195	0.725,0.867	0.911,0.935	-0.127	0.235
ENSG00000138382.13	METTL5	chr2	-	169819560	169819643	169821091	169821273	169812456	169812506	169821942	169822057	166196	23,30	184178	61,96	7.70347e-05	0.878,0.867	0.751,0.65	0.172	-0.34
ENSG00000138674.16	SEC31A	chr4	-	82861630	82861708	82862533	82862572	82857688	82857764	82863317	82863392	45,59	170198	17,10	153,91	0.00383236	0.26,0.283	0.129,0.127	0.143	-0.172
ENSG00000144504.15	ANKMY1	chr2	-	240507559	240507691	240511860	240512001	240500451	240500565	240512801	240512942	4,5	5,15	0,1	13,2	0.0341732	0.444,0.25	0.0,0.333	0.18	-0.459
ENSG00000152942.18	RAD17	chr5	+	69371034	69371171	69372033	69372217	69370059	69370284	69373829	69374087	23,18	45,56	5,2	47,24	0.00901585	0.338,0.243	0.096,0.077	0.204	0.186
ENSG00000153113.23	CAST	chr5	+	96727488	96727530	96729152	96729209	96722638	96722698	96729611	96729725	264302	281329	330262	191137	0.00010601	0.515,0.509	0.661,0.684	-0.161	0.13
ENSG00000161249.20	DMKN	chr19	-	35505938	35506049	35509910	35509961	35505717	35505765	35510183	35510252	71,78	150129	45,38	165166	0.00288187	0.362,0.42	0.247,0.216	0.16	-0.212
ENSG00000161249.20	DMKN	chr19	-	35505938	35505986	35509910	35509961	35505717	35505765	35510183	35510252	71,78	235219	45,38	268258	0.00273459	0.228,0.258	0.141,0.126	0.109	-0.132
ENSG00000162601.9	MYSM1	chr1	-	58668429	58668566	58668631	58668682	58667846	58667921	58668983	58669038	30,33	10,20	13,1	28,32	0.000339747	0.783,0.664	0.358,0.036	0.527	-0.378
ENSG00000170832.12	USP32	chr17	-	60211375	60211514	60212023	60212098	60211012	60211118	60213580	60213662	206242	14,56	131,58	286395	0	0.937,0.813	0.316,0.129	0.652	-0.661
ENSG00000181555.19	SETD2	chr3	-	47103345	47103423	47105996	47106120	47097954	47098081	47113875	47114004	28,15	2,0	28,23	5,7	0.0443773	0.933,1.0	0.848,0.767	0.159	-0.168
ENSG00000189308.10	LIN54	chr4	-	82970326	82970469	82978882	82979006	82939888	82939962	82984160	82984876	18,22	5,4	20,25	1,0	0.0130925	0.783,0.846	0.952,1.0	-0.161	0.14

## Sheet: both_A5SS
GENCODE_GeneID	geneSymbol	chr	strand	longExonStart_0base	longExonEnd	shortES	shortEE	flankingES	flankingEE	IJC_SAMPLE_1	SJC_SAMPLE_1	IJC_SAMPLE_2	SJC_SAMPLE_2	FDR	IncLevel1	IncLevel2	siMBNL2.IncLevelDifference	MCF-7.IncLevelDifference
ENSG00000058673.15	ZC3H11A	chr1	+	203796292	203796601	203796292	203796496	203801574	203801628	107163	89112	159139	78,42	0.0314536	0.375,0.421	0.505,0.623	-0.166	-0.177
ENSG00000090621.13	PABPC4	chr1	-	39571096	39571349	39571233	39571349	39569862	39570002	118179	226226	110104	110,91	0.044697	0.207,0.284	0.333,0.364	-0.103	0.16
ENSG00000100938.17	GMPR2	chr14	+	24232421	24232847	24232421	24232788	24233218	24233340	120127	80,94	179149	70,49	0.00564006	0.458,0.432	0.59,0.632	-0.166	0.232
ENSG00000101040.19	ZMYND8	chr20	-	47238757	47239138	47238895	47239138	47236325	47236516	85107	114106	105,74	32,4	5.3425e-05	0.272,0.335	0.621,0.902	-0.458	0.359
ENSG00000109686.17	SH3D19	chr4	-	151176524	151176687	151176533	151176687	151174669	151175674	1,0	34,38	3,4	29,14	0.02499	0.026,0.0	0.085,0.205	-0.132	0.159
ENSG00000128833.12	MYO5C	chr15	-	52260861	52261127	52260901	52261127	52256638	52256720	14,15	8,12	6,8	16,22	0.019492	0.535,0.451	0.198,0.193	0.297	-0.612
ENSG00000128928.8	IVD	chr15	+	40407635	40407812	40407635	40407725	40407938	40407990	19,23	84103	31,28	67,29	0.00980215	0.102,0.1	0.188,0.326	-0.156	0.162
ENSG00000130714.15	POMT1	chr9	+	131511336	131511472	131511336	131511467	131512040	131512136	30,36	194207	52,45	147118	0.00350417	0.128,0.142	0.251,0.266	-0.123	0.113
ENSG00000132424.14	PNISR	chr6	-	99403828	99404702	99404602	99404702	99402539	99402710	111100	14,31	84,66	46,41	0.0129241	0.799,0.617	0.477,0.446	0.246	-0.645
ENSG00000137312.14	FLOT1	chr6	-	30741189	30741704	30741613	30741704	30740678	30740798	463702	42,64	440313	98101	3.12193e-07	0.846,0.846	0.692,0.608	0.196	-0.139
ENSG00000137817.16	PARP6	chr15	-	72265269	72265473	72265412	72265473	72265080	72265171	47,52	173200	53,81	139,76	0.0245305	0.12,0.115	0.16,0.348	-0.137	0.123
ENSG00000138688.15	KIAA1109	chr4	+	122334343	122334545	122334343	122334440	122336191	122336353	10,19	88,96	28,33	63,30	0.0004419	0.054,0.09	0.182,0.355	-0.196	0.101
ENSG00000142794.18	NBPF3	chr1	+	21478143	21478307	21478143	21478196	21479348	21479400	25,32	4,2	18,7	0,0	0.0129241	0.758,0.889	1.0,1.0	-0.176	0.189
ENSG00000143702.15	CEP170	chr1	-	243142315	243142463	243142366	243142463	243139936	243140107	12,10	5,8	2,0	2,7	0.0280488	0.59,0.429	0.375,0.0	0.322	-0.649
ENSG00000144357.16	UBR3	chr2	+	170006989	170007202	170006989	170007190	170008803	170008940	11,9	31,24	4,2	49,42	0.00484074	0.236,0.246	0.066,0.04	0.188	-0.27
ENSG00000149532.15	CPSF7	chr11	-	61420469	61421608	61421389	61421608	61419921	61420094	50,54	2,4	40,41	7,10	0.0488931	0.926,0.871	0.741,0.672	0.192	-0.371
ENSG00000151632.16	AKR1C2	chr10	-	4999199	5000666	5000549	5000666	4998624	4998747	251258	26,57	73,36	55,84	2.94064e-07	0.828,0.694	0.399,0.176	0.473	-0.124
ENSG00000160193.11	WDR4	chr21	-	42873550	42873691	42873602	42873691	42863439	42863596	7,2	8,5	1,0	5,1	0.0343068	0.342,0.192	0.106,0.0	0.214	-0.558
ENSG00000160710.15	ADAR	chr1	-	154590183	154590409	154590261	154590409	154589756	154589928	185227	70,60	218131	24,11	5.2281e-05	0.569,0.654	0.82,0.856	-0.227	0.226
ENSG00000165410.14	CFL2	chr14	-	34713253	34713561	34713396	34713561	34713059	34713136	45,67	13,9	88,86	4,4	0.013598	0.634,0.788	0.917,0.915	-0.205	0.368
ENSG00000167193.7	CRK	chr17	-	1436619	1437155	1436789	1437155	1420688	1423650	52,92	96,85	82,61	51,34	0.027452	0.213,0.351	0.446,0.473	-0.178	0.101
ENSG00000186716.19	BCR	chr22	+	23311696	23311918	23311696	23311836	23312886	23313021	1,2	44,46	12,9	36,14	5.3425e-05	0.011,0.021	0.143,0.243	-0.177	0.116

## Sheet: both_A3SS
GENCODE_GeneID	geneSymbol	chr	strand	longExonStart_0base	longExonEnd	shortES	shortEE	flankingES	flankingEE	IJC_SAMPLE_1	SJC_SAMPLE_1	IJC_SAMPLE_2	SJC_SAMPLE_2	FDR	IncLevel1	IncLevel2	siMBNL2.IncLevelDifference	MCF-7.IncLevelDifference
ENSG00000085831.15	TTC39A	chr1	-	51309260	51309430	51309260	51309325	51311253	51311321	25,30	106129	33,26	68,39	0.016	0.105,0.104	0.195,0.25	-0.12	-0.14
ENSG00000102081.13	FMR1	chrX	+	147944868	147945051	147944943	147945051	147943130	147943326	221213	15,40	220193	10,6	0.014	0.881,0.728	0.917,0.942	-0.13	0.28
ENSG00000109381.19	ELF2	chr4	-	139071865	139072039	139071865	139072003	139073453	139073567	32,40	24,43	45,48	16,15	0.014	0.476,0.388	0.657,0.686	-0.24	0.4
ENSG00000109685.17	WHSC1	chr4	+	1952751	1953524	1953323	1953524	1952104	1952231	18,42	58,74	29,28	18,8	0.001	0.134,0.221	0.446,0.636	-0.36	0.26
ENSG00000111912.19	NCOA7	chr6	+	125888938	125889981	125888971	125889981	125885158	125885343	6,4	5,6	10,10	2,0	0.008	0.457,0.318	0.778,1.0	-0.5	0.18
ENSG00000118200.14	CAMSAP2	chr1	+	200847209	200847292	200847257	200847292	200844781	200844869	80107	8,10	63,20	17,16	0.014	0.86,0.868	0.695,0.435	0.3	0.14
ENSG00000125835.17	SNRPB	chr20	-	2461633	2461939	2461633	2461793	2462635	2462761	424375	105127	422357	68,70	0.047	0.669,0.596	0.756,0.718	-0.1	0.11
ENSG00000140553.16	UNC45A	chr15	+	90936136	90936460	90936284	90936460	90935945	90935982	7,12	98,85	21,41	39,34	0	0.034,0.066	0.212,0.376	-0.24	-0.19
ENSG00000143416.20	SELENBP1	chr1	-	151365767	151366453	151365767	151365846	151366721	151366904	88,92	21,21	60,37	27,30	0.037	0.677,0.687	0.526,0.381	0.23	0.11
ENSG00000163785.12	RYK	chr3	-	134191848	134191983	134191848	134191974	134195081	134195182	80,83	86102	61,41	119123	0.011	0.457,0.424	0.317,0.231	0.17	0.19
ENSG00000168010.10	ATG16L2	chr11	+	72821198	72821741	72821667	72821741	72817755	72817855	58,60	14,3	54,89	3,0	0.019	0.674,0.909	0.9,1.0	-0.16	0.41
ENSG00000168872.16	DDX19A	chr16	+	70365932	70366262	70366084	70366262	70365016	70365131	10,10	63,79	23,23	39,12	0.001	0.074,0.06	0.228,0.489	-0.29	0.21
ENSG00000168894.9	RNF181	chr2	+	85596952	85597178	85597103	85597178	85596518	85596649	58,97	28,30	156259	29,19	0.005	0.509,0.618	0.729,0.872	-0.24	0.23
ENSG00000170037.13	CNTROB	chr17	+	7936237	7936482	7936365	7936482	7934988	7935145	40,39	69,81	48,82	46,31	0.017	0.225,0.194	0.343,0.569	-0.25	0.16
ENSG00000198131.13	ZNF544	chr19	+	58246710	58246794	58246745	58246794	58246300	58246427	34,45	12,15	30,18	4,0	0.045	0.661,0.674	0.838,1.0	-0.25	0.21

[truncated: 1 more sheets: both_RI]
